# Supplementary material for: Asymmetric synthesis of (aza)flavanones by the evolution of CarOx ligands
Source: Royal Society of Chemistry journal article supplement (doi:10.1039/d4qo01345j), 2024-01-01

*Supplementary Information for*

**Asymmetric Synthesis of (Aza)flavanones by the Evolution of  
CarOx Ligands**

Juan Yang<sup>†#</sup>, Wenlong Kong<sup>†#</sup>, Shengxin Sun<sup>†</sup>, Mingxin Chang<sup>‡</sup>, Jixing Lai<sup>†</sup>,  
Shengkun Li<sup>\*†</sup>

<sup>†</sup> State Key Laboratory of Green Pesticide, Key Laboratory of Green Pesticide and  
Agricultural Bioengineering, Ministry of Education, Center for R&D of Fine  
Chemicals of Guizhou University, Guiyang, 550025, China.

<sup>‡</sup> College of Chemistry & Pharmacy, Northwest A&F University, Yangling 712100,  
China

<sup>#</sup>These two authors contribute equally

Corresponding Author: Shengkun Li, Email [SKL505@outlook.com](mailto:SKL505@outlook.com)

# Content

|                                                                                |    |
|--------------------------------------------------------------------------------|----|
| 1. General Information .....                                                   | 3  |
| 2. Synthesis and structural elucidation of new NHPyOx ligands .....            | 4  |
| 2.1 The synthesis of 3-bromo pyridine oxazolines .....                         | 4  |
| 2.2 Synthesis and characteristic data of 3-arylamido-pyridine oxazolines ..... | 5  |
| 2.3 Synthesis and characteristic data of 3-arylamino-pyridine oxazolines ..... | 6  |
| 2.4 Analysis of substituted PyOx ligands for asymmetric transformations .....  | 17 |
| 3. Asymmetric addition of arylboronic acid to <i>N</i> -Cbz-4-quinolone .....  | 18 |
| 3.1 Establishment of the optimal condition .....                               | 19 |
| 3.2 Substrate scope .....                                                      | 26 |
| 3.3 Asymmetric addition of arylboronic acid to chromone by NL11 .....          | 28 |
| 4. Procedure for the Synthesis of 10 on a 1-mmol-scale .....                   | 28 |
| 5. Spectroscopic data for 2-phenyl-3,4-dihydroquinolines .....                 | 29 |
| 6. Density functional theory (DFT) of NL11 .....                               | 80 |
| 7. NMR spectra .....                                                           | 84 |

## 1. General Information

All solvents and reagents were purchased from commercial sources (Energy or Meryer Chemicals etc.), they were analytically pure and used as received. Silica gel GF<sub>254</sub> and column chromatography silica gel for isolation (200-300 mesh) were both purchased from Qingdao Broadchem Industrial Co., Ltd. Reaction progress was monitored by thin-layer chromatography (TLC) on silica gel GF<sub>254</sub> with ultraviolet (UV<sub>254nm</sub> and UV<sub>365nm</sub>) detection. NMR spectra were measured either on a JMTC-500 (500 MHz) or a DPX Ascend 400 (400 MHz) spectrometer. The chemical shift values were corrected to 7.26 ppm (<sup>1</sup>H NMR) and 77.16 ppm (<sup>13</sup>C NMR) for CHCl<sub>3</sub>. <sup>1</sup>H NMR splitting patterns are designated as singlet (s), double (d), triplet (t), quartet (q), doublet of doublets (dd), multiplets (m), etc. All first-order splitting patterns were assigned on the base of the appearance of the multiplet. Splitting patterns that could not be easily interpreted are designated as multiplet (m). The identity of compounds was confirmed with HRMS using a Thermo Scientific Q Exactive. The melting point (m.p.) was corrected and recorded on the WRS-2A digital melting point instrument. The specific rotation ( $[\alpha]_D^{25}$ ) was corrected and recorded on the SGWzz-3 polarimeter. The ee values were determined by HPLC LC-2030 Plus.

## 2. Synthesis and structural elucidation of new NHPyOx ligands

### 2.1 The synthesis of 3-bromo pyridine oxazolines

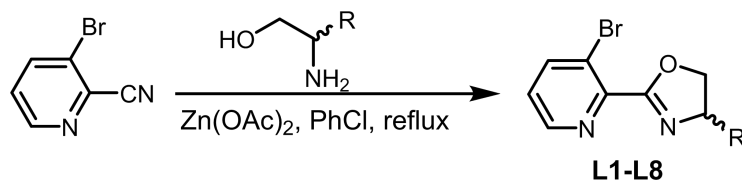

To a Schlenk flask charged with the compound 3-Bromo-2-cyanopyridine (3.0 mmol) and  $\text{Zn}(\text{OAc})_2$  (0.6 mmol, 0.2 equiv.) was added anhydrous PhCl (9 mL). Then chiral amino alcohol (3.6 mmol, 1.2 equiv.) was added. The reaction mixture was stirred at 140 °C (heating mantle) until the full consumption of the starting material was detected by TLC. The mixture was quenched by the addition of a saturated aqueous solution of  $\text{NaHCO}_3$  (5 mL) and separated, the water phase was extracted with EtOAc (5 mL  $\times$  3), and the combined organic phase was sequentially washed with water (5 mL  $\times$  2), dried over anhydrous sodium sulfate, and concentrated under vacuum. Purification by silica gel column chromatography on silica gel (200-300 m) with petroleum ether/EtOAc (3:1, v/v) as the eluent gave the compounds 3-Bromo-PyOx **L1-L8**.

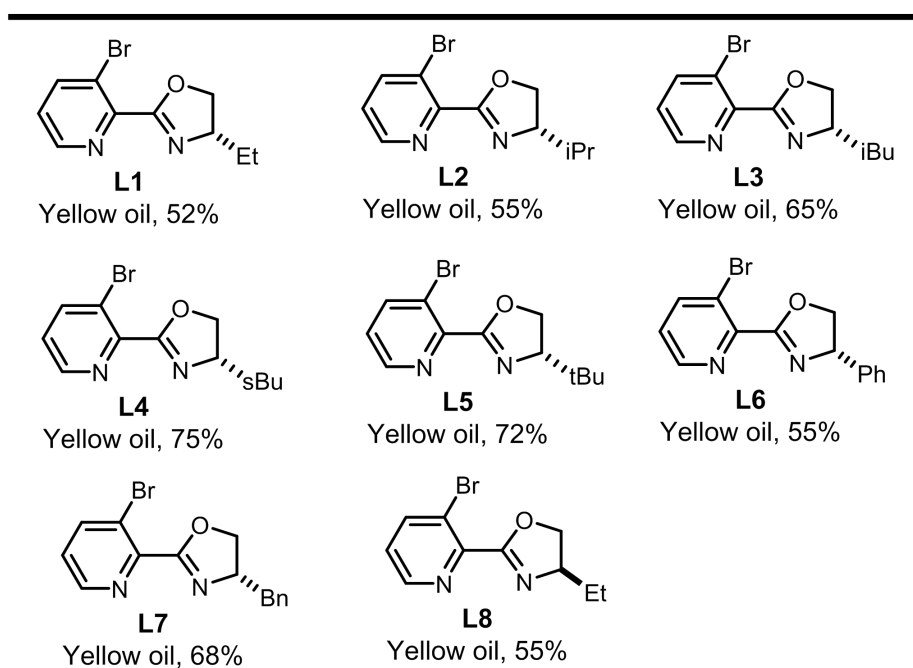



## 2.2 Synthesis and characteristic data of 3-arylamido-pyridine oxazolines

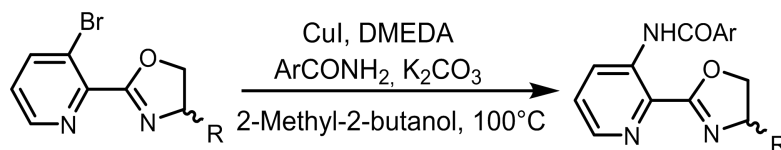

To a Schlenk tube charged with 3-Bromo-PyOx (0.2 mmol), K<sub>2</sub>CO<sub>3</sub> (0.3 mmol, 1.5 equiv, 42 mg), CuI (0.05 mmol, 25 mol%, 9.5 mg), DMEDA (0.06 mmol, 30 mol%, 6.5  $\mu$ L) and aryl formamide (0.4 mmol, 2.0 equiv) was added anhydrous 2-Methyl-2-butanol (0.8 mL, 0.25 M) under N<sub>2</sub> atmosphere. The reaction mixture was stirred at 100° C (heating mantle) until the full consumption of the starting material was detected by TLC. The mixture was quenched by the addition of H<sub>2</sub>O (5 mL) and separated, the water phase was extracted with EtOAc (5 mL  $\times$  3), dried over anhydrous sodium sulfate, and concentrated under vacuum. Purification by silica gel column chromatography on silica gel (200-300 m) with petroleum ether/EtOAc (3:1, v/v) as the eluent gave the compounds 3-arylamido pyridine oxazolines.

### (S)-N-(2-(4-(tert-butyl)-4,5-dihydrooxazol-2-yl)pyridin-3-yl)benzamide (CL5)

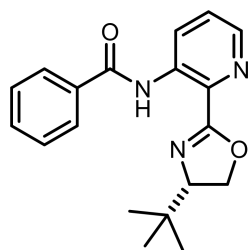

White solid, 31.0 mg, 48% yield.

<sup>1</sup>H NMR (500 MHz, CDCl<sub>3</sub>)  $\delta$  13.01 (s, 1H), 9.33 (dd,  $J_1 = 8.6$  Hz,  $J_2 = 1.5$  Hz, 1H), 8.43 (dd,  $J_1 = 4.5$  Hz,  $J_2 = 1.5$  Hz, 1H), 8.08 (dd,  $J_1 = 8.4$  Hz,  $J_2 = 1.3$  Hz, 2H), 7.61-7.53 (m, 1H), 7.51-7.43 (m, 3H), 4.53-4.43 (m, 1H), 4.36-4.26 (m, 2H), 0.97 (s, 9H).

<sup>13</sup>C NMR (126 MHz, CDCl<sub>3</sub>)  $\delta$  167.0, 163.9, 143.6, 138.2, 134.7, 132.3, 131.7, 128.8, 127.9, 127.6, 126.7, 76.7, 68.2, 34.1, 26.1.

HRMS (ESI) [M+H]<sup>+</sup> calcd for C<sub>19</sub>H<sub>22</sub>N<sub>3</sub>O<sub>2</sub>: 324.1707, found: 324.1709.

### 2.3 Synthesis and characteristic data of 3-arylamino-pyridine oxazolines

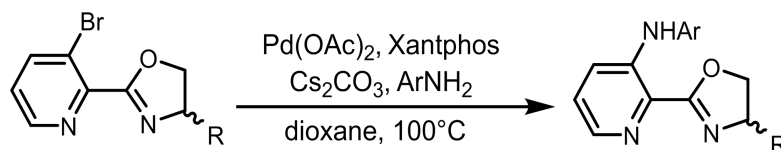

To a Schlenk tube charged with 3-Bromo-PyOx (0.2 mmol), Cs<sub>2</sub>CO<sub>3</sub> (0.4 mmol, 2.0 equiv, 130 mg), Pd(OAc)<sub>2</sub> (0.02 mmol, 10 mol%, 4.5 mg), Xantphos (0.024 mmol, 12 mol%, 13.9 mg) and arylamine (0.22 mmol, 1.2 equiv) was added anhydrous dioxane (1.0 mL, 0.2 M) under N<sub>2</sub> atmosphere. The reaction mixture was stirred at 100°C until the full consumption of the starting material was detected by TLC. The mixture was quenched by the addition of H<sub>2</sub>O (5 mL) and separated, the water phase was extracted with EtOAc (5 mL × 3), dried over anhydrous sodium sulfate, and concentrated under vacuum. Purification by silica gel column chromatography on silica gel (200-300 m) with petroleum ether/EtOAc (5:1, v/v) as the eluent gave the compounds 3-arylamino pyridine oxazolines.

#### (S)-2-(4-ethyl-4,5-dihydrooxazol-2-yl)-N-phenylpyridin-3-amine (NL1)

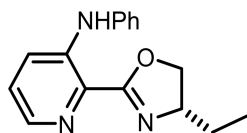

Yellow oil, 24.6 mg, 46% yield.

<sup>1</sup>H NMR (500 MHz, CDCl<sub>3</sub>) δ 10.52 (s, 1H), 8.11 (dd, *J*<sub>1</sub> = 4.3 Hz, *J*<sub>2</sub> = 1.5 Hz, 1H), 7.65 (dd, *J*<sub>1</sub> = 8.6 Hz, *J*<sub>2</sub> = 1.4 Hz, 1H), 7.42-7.33 (m, 2H), 7.27-7.22 (m, 2H), 7.18 (dd, *J*<sub>1</sub> = 8.6 Hz, *J*<sub>2</sub> = 4.4 Hz, 1H), 7.15-7.09 (m, 1H), 4.53 (dd, *J*<sub>1</sub> = 9.6 Hz, *J*<sub>2</sub> = 8.3 Hz, 1H), 4.42-4.34 (m, 1H), 4.09 (t, *J* = 8.1 Hz, 1H), 1.77-1.66 (m, 2H), 1.06 (t, *J* = 7.4 Hz, 3H).

<sup>13</sup>C NMR (126 MHz, CDCl<sub>3</sub>) δ 163.6, 143.0, 140.3, 138.6, 129.6, 128.8, 126.0, 123.8, 122.3, 120.4, 71.3, 68.4, 29.1, 10.5.

HRMS (ESI) [M+H]<sup>+</sup> calcd for C<sub>16</sub>H<sub>18</sub>N<sub>3</sub>O: 268.1444, found: 268.1449.

**(S)-2-(4-isopropyl-4,5-dihydrooxazol-2-yl)-N-phenylpyridin-3-amine (NL2)**

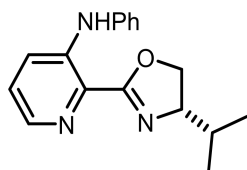

Yellow oil, 35.4 mg, 63% yield.

$^1\text{H}$  NMR (500 MHz,  $\text{CDCl}_3$ )  $\delta$  10.60 (s, 1H), 8.09 (dd,  $J_1 = 4.3$  Hz,  $J_2 = 1.4$  Hz, 1H), 7.65 (dd,  $J_1 = 8.6$  Hz,  $J_2 = 1.4$  Hz, 1H), 7.38-7.32 (m, 2H), 7.24-7.20 (m, 2H), 7.17-7.14 (m, 1H), 7.11-7.07 (m, 1H), 4.50-4.45 (m, 1H), 4.25-4.11 (m, 2H), 1.85-1.80 (m, 1H), 1.05 (d,  $J = 6.7$  Hz, 3H), 0.96 (d,  $J = 6.8$  Hz, 3H).

$^{13}\text{C}$  NMR (126 MHz,  $\text{CDCl}_3$ )  $\delta$  163.6, 143.0, 140.4, 138.6, 129.6, 128.8, 125.9, 123.7, 122.0, 120.4, 73.1, 69.7, 33.4, 19.1, 18.9.

HRMS (ESI)  $[\text{M}+\text{H}]^+$  calcd for  $\text{C}_{17}\text{H}_{20}\text{N}_3\text{O}$ : 282.1601, found: 282.1606.

**(S)-2-(4-isobutyl-4,5-dihydrooxazol-2-yl)-N-phenylpyridin-3-amine (NL3)**

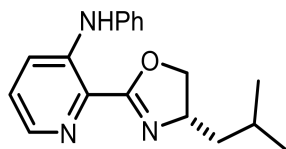

Yellow oil, 38.4 mg, 65% yield.

$^1\text{H}$  NMR (500 MHz,  $\text{CDCl}_3$ )  $\delta$  10.49 (s, 1H), 8.07 (dd,  $J_1 = 4.2$  Hz,  $J_2 = 1.4$  Hz, 1H), 7.61 (dd,  $J_1 = 8.8$  Hz,  $J_2 = 1.5$  Hz, 1H), 7.37-7.31 (m, 2H), 7.22-7.17 (m, 2H), 7.13 (dd,  $J_1 = 8.6$  Hz,  $J_2 = 4.4$  Hz, 1H), 7.11-7.04 (m, 1H), 4.52 (dd,  $J_1 = 9.5$  Hz,  $J_2 = 7.8$  Hz, 1H), 4.47-4.41 (m, 1H), 3.98 (t,  $J = 7.9$  Hz, 1H), 1.91-1.79 (m, 1H), 1.69-1.64 (m, 1H), 1.46-1.41 (m, 1H), 0.98 (dd,  $J_1 = 6.6$  Hz,  $J_2 = 4.2$  Hz, 6H).

$^{13}\text{C}$  NMR (126 MHz,  $\text{CDCl}_3$ )  $\delta$  163.5, 142.9, 140.3, 138.6, 129.6, 128.8, 125.9, 123.7, 122.1, 120.4, 72.1, 65.4, 45.6, 25.9, 23.0, 22.7.

HRMS (ESI)  $[\text{M}+\text{H}]^+$  calcd for  $\text{C}_{18}\text{H}_{22}\text{N}_3\text{O}$ : 296.1757, found: 296.1749.

**2-((S)-4-((S)-sec-butyl)-4,5-dihydrooxazol-2-yl)-N-phenylpyridin-3-amine (NL4)**

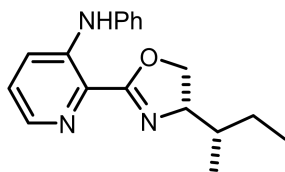

Yellow oil, 44.3 mg, 75% yield.

$^1\text{H}$  NMR (500 MHz,  $\text{CDCl}_3$ )  $\delta$  10.60 (s, 1H), 8.12 (dd,  $J_1 = 4.5$  Hz,  $J_2 = 1.4$  Hz, 1H), 7.67 (dd,  $J_1 = 8.6$  Hz,  $J_2 = 1.4$  Hz, 1H), 7.41-7.37 (m, 2H), 7.25 (d,  $J = 7.9$  Hz, 2H), 7.21-7.11 (m, 2H), 4.49 (t,  $J = 8.3$  Hz, 1H), 4.35-4.30 (m, 1H), 4.17 (t,  $J = 8.1$  Hz, 1H), 1.72-1.69 (m, 2H), 1.35-1.26 (m, 1H), 0.99 (t,  $J = 7.3$  Hz, 3H), 0.94 (t,  $J = 5.5$  Hz, 3H).

$^{13}\text{C}$  NMR (126 MHz,  $\text{CDCl}_3$ )  $\delta$  163.5, 142.9, 140.3, 138.6, 129.6, 128.8, 125.9, 123.7, 122.0, 120.3, 71.7, 69.3, 39.5, 26.1, 15.0, 11.4.

HRMS (ESI)  $[\text{M}+\text{H}]^+$  calcd for  $\text{C}_{18}\text{H}_{22}\text{N}_3\text{O}$ : 296.1757, found: 296.1760.

**(S)-2-(4-(tert-butyl)-4,5-dihydrooxazol-2-yl)-N-phenylpyridin-3-amine (NL5)**

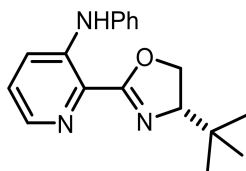

Yellow solid, 42.5 mg, 72% yield.

$^1\text{H}$  NMR (400 MHz,  $\text{CDCl}_3$ )  $\delta$  10.70 (s, 1H), 8.12 (dd,  $J_1 = 4.3$  Hz,  $J_2 = 1.4$  Hz, 1H), 7.71 (dd,  $J_1 = 8.6$  Hz,  $J_2 = 1.4$  Hz, 1H), 7.40-7.36 (m, 2H), 7.26-7.24 (m, 2H), 7.22-7.18 (m, 1H), 7.14-7.09 (m, 1H), 4.43 (dd,  $J_1 = 9.7$  Hz,  $J_2 = 8.2$  Hz, 1H), 4.30-4.20 (m, 2H), 1.00 (s, 9H).

$^{13}\text{C}$  NMR (126 MHz,  $\text{CDCl}_3$ ):  $\delta$  169.2, 143.9, 140.1, 137.2, 130.4, 129.6, 127.2, 123.9, 122.4, 121.9, 63.6, 60.0, 33.8, 27.1.

HRMS (ESI)  $[\text{M}+\text{H}]^+$  calcd for  $\text{C}_{18}\text{H}_{22}\text{N}_3\text{O}$ : 296.1757, found: 296.1750.

**(S)-N-phenyl-2-(4-phenyl-4,5-dihydrooxazol-2-yl)pyridin-3-amine (NL6)**

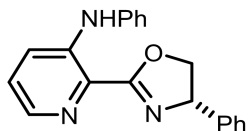

Yellow oil, 36.6 mg, 58% yield.

$^1\text{H}$  NMR (500 MHz,  $\text{CDCl}_3$ )  $\delta$  10.48 (s, 1H), 8.18 (dd,  $J_1 = 4.3$  Hz,  $J_2 = 1.4$  Hz, 1H), 7.68 (dd,  $J_1 = 8.6$  Hz,  $J_2 = 1.4$  Hz, 1H), 7.44-7.32 (m, 7H), 7.28-7.20 (m, 3H), 7.17-7.11 (m, 1H), 5.59 (dd,  $J_1 = 10.2$  Hz,  $J_2 = 8.6$  Hz, 1H), 4.88 (dd,  $J_1 = 10.2$  Hz,  $J_2 = 8.5$  Hz, 1H), 4.33 (t,  $J = 8.5$  Hz, 1H).

$^{13}\text{C}$  NMR (126 MHz,  $\text{CDCl}_3$ )  $\delta$  165.0, 143.5, 142.1, 140.0, 138.7, 129.5, 128.9, 128.3, 127.8, 126.7, 126.3, 124.1, 122.7, 120.5, 73.7, 70.4.

HRMS (ESI)  $[\text{M}+\text{H}]^+$  calcd for  $\text{C}_{20}\text{H}_{18}\text{N}_3\text{O}$ : 316.1444, found: 316.1449.

**(S)-2-(4-benzyl-4,5-dihydrooxazol-2-yl)-N-phenylpyridin-3-amine (NL7)**

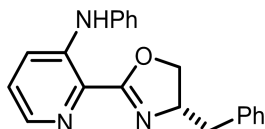

Yellow oil, 42.1 mg, 64% yield.

$^1\text{H}$  NMR (500 MHz,  $\text{CDCl}_3$ )  $\delta$  10.44 (s, 1H), 8.09 (dd,  $J_1 = 4.3$  Hz,  $J_2 = 1.4$  Hz, 1H), 7.65 (dd,  $J_1 = 8.6$  Hz,  $J_2 = 1.4$  Hz, 1H), 7.39-7.33 (m, 2H), 7.32-7.24 (m, 5H), 7.21-7.15 (m, 3H), 7.12-7.09 (m, 1H), 4.72-4.66 (m, 1H), 4.47 (dd,  $J_1 = 9.4$  Hz,  $J_2 = 8.5$  Hz, 1H), 4.18 (dd,  $J_1 = 8.5$  Hz,  $J_2 = 7.6$  Hz, 1H), 3.10 (dd,  $J_1 = 13.6$  Hz,  $J_2 = 7.1$  Hz, 1H), 2.86 (dd,  $J_1 = 13.6$  Hz,  $J_2 = 7.4$  Hz, 1H).

$^{13}\text{C}$  NMR (126 MHz,  $\text{CDCl}_3$ )  $\delta$  164.0, 143.1, 140.3, 138.7, 138.1, 129.6, 129.3, 128.72, 128.67, 126.7, 126.1, 123.8, 122.1, 120.7, 71.1, 68.4, 42.3.

HRMS (ESI)  $[\text{M}+\text{H}]^+$  calcd for  $\text{C}_{21}\text{H}_{20}\text{N}_3\text{O}$ : 330.1601, found: 330.1609.

**(S)-2-(4-(tert-butyl)-4,5-dihydrooxazol-2-yl)-N-(4-methoxyphenyl)pyridin-3-amine (NL8)**

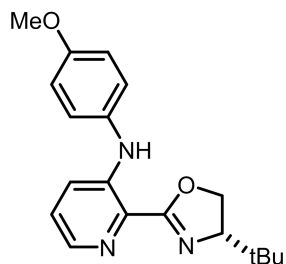

Yellow oil, 34.5 mg, 53% yield.

$^1\text{H}$  NMR (500 MHz,  $\text{CDCl}_3$ )  $\delta$  10.53 (s, 1H), 8.05 (dd,  $J_1 = 4.3$  Hz,  $J_2 = 1.4$  Hz, 1H), 7.57 (dd,  $J_1 = 8.6$  Hz,  $J_2 = 1.4$  Hz, 1H), 7.17-7.10 (m, 5H), 4.40-4.37 (m, 1H), 4.26-4.17 (m, 2H), 3.81 (s, 3H), 0.96 (s, 9H).

$^{13}\text{C}$  NMR (126 MHz,  $\text{CDCl}_3$ )  $\delta$  163.7, 156.7, 144.4, 137.9, 133.1, 128.0, 126.0, 125.1, 119.7, 114.9, 76.5, 67.7, 55.6, 34.0, 26.0.

HRMS (ESI)  $[\text{M}+\text{H}]^+$  calcd for  $\text{C}_{19}\text{H}_{24}\text{N}_3\text{O}_2$ : 326.1863, found: 326.1869.

**(S)-2-(4-(tert-butyl)-4,5-dihydrooxazol-2-yl)-N-(p-tolyl)pyridin-3-amine (NL9)**

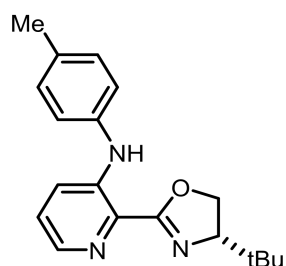

Yellow oil, 28.4 mg, 46% yield.

$^1\text{H}$  NMR (500 MHz,  $\text{CDCl}_3$ )  $\delta$  10.35 (s, 1H), 8.03 (dd,  $J_1 = 4.3$  Hz,  $J_2 = 1.4$  Hz, 1H), 7.40 (dd,  $J_1 = 8.6$  Hz,  $J_2 = 1.4$  Hz, 1H), 7.20-7.07 (m, 3H), 6.96-6.84 (m, 2H), 4.39 (dd,  $J_1 = 9.4$  Hz,  $J_2 = 8.5$  Hz, 1H), 4.28-4.14 (m, 2H), 2.34 (s, 3H), 0.95 (s, 9H).

$^{13}\text{C}$  NMR (126 MHz,  $\text{CDCl}_3$ )  $\delta$  163.6, 143.5, 138.2, 137.6, 133.5, 130.2, 128.4, 126.0, 122.4, 120.1, 76.4, 67.7, 33.9, 26.0, 20.9.

HRMS (ESI)  $[\text{M}+\text{H}]^+$  calcd for  $\text{C}_{19}\text{H}_{24}\text{N}_3\text{O}$ : 310.1914, found: 310.1918.

**(S)-2-(4-(tert-butyl)-4,5-dihydrooxazol-2-yl)-N-(4-chlorophenyl)pyridin-3-amine (NL10)**

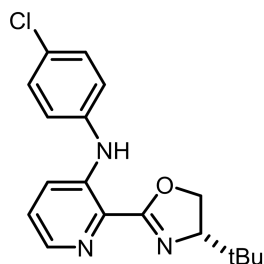

Yellow oil, 42.1 mg, 64% yield.

$^1\text{H}$  NMR (500 MHz,  $\text{CDCl}_3$ )  $\delta$  10.25 (s, 1H), 7.92 (dd,  $J_1 = 4.3$  Hz,  $J_2 = 1.4$  Hz, 1H), 7.54 (dd,  $J_1 = 8.6$  Hz,  $J_2 = 1.4$  Hz, 1H), 7.31-7.25 (m, 2H), 7.19 (dd,  $J_1 = 8.6$  Hz,  $J_2 = 4.3$  Hz, 1H), 7.16-7.10 (m, 2H), 3.98-3.90 (m, 2H), 3.69-3.63 (m, 1H), 1.03 (s, 9H).

$^{13}\text{C}$  NMR (126 MHz,  $\text{CDCl}_3$ )  $\delta$  169.1, 143.6, 138.8, 137.6, 130.7, 129.6, 128.8, 127.3, 123.5, 121.8, 63.6, 60.1, 33.8, 27.1.

HRMS (ESI)  $[\text{M}+\text{H}]^+$  calcd for  $\text{C}_{18}\text{H}_{21}\text{ClN}_3\text{O}$ : 330.1368, found: 330.1370.

**(S)-2-(4-(tert-butyl)-4,5-dihydrooxazol-2-yl)-N-(4-fluorophenyl)pyridin-3-amine  
(NL11)**

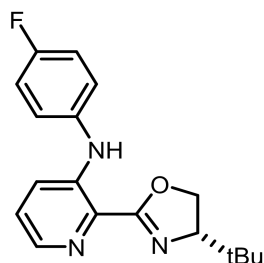

Yellow oil, 45.1 mg, 72% yield.

$^1\text{H}$  NMR (400 MHz,  $\text{CDCl}_3$ )  $\delta$  10.55 (s, 1H), 8.07 (dd,  $J_1 = 4.4$  Hz,  $J_2 = 1.4$  Hz, 1H), 7.48 (dd,  $J_1 = 8.7$  Hz,  $J_2 = 1.5$  Hz, 1H), 7.36-7.29 (m, 1H), 7.19-7.12 (m, 2H), 7.05 (t,  $J = 8.6$  Hz, 2H), 4.39 (dd,  $J_1 = 9.8$  Hz,  $J_2 = 8.3$  Hz, 1H), 4.27-4.16 (m, 2H), 0.96 (s, 9H).

$^{13}\text{C}$  NMR (126 MHz,  $\text{CDCl}_3$ )  $\delta$  162.6, 159.5 (d,  $J = 242.7$  Hz), 156.5, 145.7, 138.4, 136.0 (d,  $J = 2.6$  Hz), 123.8 (d,  $J = 8.0$  Hz), 116.3 (d,  $J = 22.5$  Hz), 115.4, 109.2, 76.5, 69.3, 34.1, 26.0.

HRMS (ESI)  $[M+H]^+$  calcd for  $C_{18}H_{21}FN_3O$ : 314.1663, found: 314.1658.

**(S)-2-(4-(tert-butyl)-4,5-dihydrooxazol-2-yl)-N-(4-(trifluoromethyl) phenyl) pyridin-3-amine (NL12)**

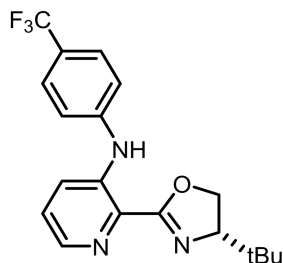

Yellow oil, 41.5 mg, 57% yield.

$^1H$  NMR (400 MHz,  $CDCl_3$ )  $\delta$  11.02 (s, 1H), 8.20 (dd,  $J_1 = 4.4$  Hz,  $J_2 = 1.4$  Hz, 1H), 7.79 (dd,  $J_1 = 8.6$  Hz,  $J_2 = 1.4$  Hz, 1H), 7.58 (d,  $J = 8.5$  Hz, 2H), 7.32-7.24 (m, 3H), 4.43 (dd,  $J_1 = 9.8$  Hz,  $J_2 = 8.3$  Hz, 1H), 4.33-4.20 (m, 2H), 0.98 (s, 9H).

$^{13}C$  NMR (101 MHz,  $CDCl_3$ )  $\delta$  163.5, 144.0, 141.3, 139.9, 130.0, 126.9 (q,  $J = 3.7$  Hz), 125.9, 124.6, 124.3 (d,  $J = 271.1$  Hz), 124.2, 119.4, 76.4, 67.9, 33.9, 26.0.

HRMS (ESI)  $[M+H]^+$  calcd for  $C_{19}H_{21}F_3N_3O$ : 364.1631, found: 364.1638.

**(S)-2-(4-(tert-butyl)-4,5-dihydrooxazol-2-yl)-N-(3-fluorophenyl)pyridin-3-amine (NL13)**

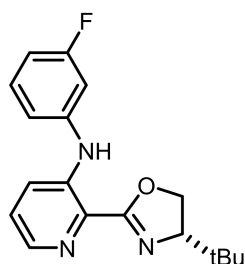

Yellow oil, 38.8 mg, 62% yield.

$^1H$  NMR (500 MHz,  $CDCl_3$ )  $\delta$  10.83 (s, 1H), 8.15 (dd,  $J_1 = 4.3$  Hz,  $J_2 = 1.4$  Hz, 1H), 7.74 (dd,  $J_1 = 8.6$  Hz,  $J_2 = 1.4$  Hz, 1H), 7.29 (td,  $J_1 = 8.3$  Hz,  $J_2 = 6.6$  Hz, 1H), 7.22 (dd,  $J_1 = 8.6$  Hz,  $J_2 = 4.3$  Hz, 1H), 7.01-6.91 (m, 2H), 6.76 (dd,  $J_1 = 8.3$  Hz,  $J_2 = 2.4$  Hz, 1H), 4.42 (dd,  $J_1 = 10.0$  Hz,  $J_2 = 8.4$  Hz, 1H), 4.29-4.19 (m, 2H), 0.98 (s, 9H).



$^{13}\text{C}$  NMR (126 MHz,  $\text{CDCl}_3$ )  $\delta$  163.7 (d,  $J = 245.8$  Hz), 163.5, 142.4 (d,  $J = 10.1$  Hz), 142.1, 139.3, 130.7 (d,  $J = 9.8$  Hz), 129.4, 126.0, 120.9, 116.5 (d,  $J = 2.9$  Hz), 109.9 (d,  $J = 21.3$  Hz), 107.7 (d,  $J = 23.7$  Hz), 76.4, 67.8, 33.9, 26.0.

HRMS (ESI)  $[\text{M}+\text{H}]^+$  calcd for  $\text{C}_{18}\text{H}_{21}\text{FN}_3\text{O}$ : 314.1663, found: 314.1660.

**(S)-2-(4-(tert-butyl)-4,5-dihydrooxazol-2-yl)-N-(2-fluorophenyl)pyridin-3-amine (NL14)**

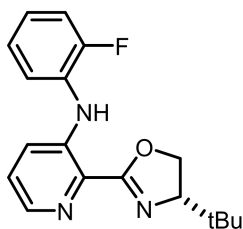

Yellow oil, 33.8 mg, 54% yield.

$^1\text{H}$  NMR (400 MHz,  $\text{CDCl}_3$ )  $\delta$  10.69 (s, 1H), 8.11 (dd,  $J_1 = 4.3$  Hz,  $J_2 = 1.4$  Hz, 1H), 7.56-7.53 (m, 1H), 7.41-7.37 (m, 1H), 7.19-6.98 (m, 4H), 4.39 (dd,  $J_1 = 9.3$  Hz,  $J_2 = 7.7$  Hz, 1H), 4.26-4.17 (m, 2H), 0.95 (s, 9H).

$^{13}\text{C}$  NMR (101 MHz,  $\text{CDCl}_3$ )  $\delta$  163.5, 155.5 (d,  $J = 245.9$  Hz), 142.2, 139.0, 129.4, 128.5 (d,  $J = 11.8$  Hz), 125.8, 124.3 (d,  $J = 3.8$  Hz), 124.1 (d,  $J = 7.4$  Hz), 122.2 (d,  $J = 1.8$  Hz), 120.4 (d,  $J = 1.2$  Hz), 116.3 (d,  $J = 19.6$  Hz), 76.4, 67.8, 33.9, 25.9.

HRMS (ESI)  $[\text{M}+\text{H}]^+$  calcd for  $\text{C}_{18}\text{H}_{21}\text{FN}_3\text{O}$ : 314.1663, found: 314.1669.

**(S)-2-(4-(tert-butyl)-4,5-dihydrooxazol-2-yl)-N-(2,6-difluorophenyl)pyridin-3-amine (NL15)**

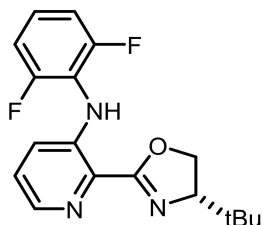

Yellow oil, 42.9 mg, 65% yield.

$^1\text{H}$  NMR (500 MHz,  $\text{CDCl}_3$ )  $\delta$  10.52 (s, 1H), 8.11 (d,  $J = 4.4$  Hz, 1H), 7.19-7.07 (m, 2H), 6.98-6.94 (m, 3H), 4.41-4.37 (m, 1H), 4.27-4.18 (m, 2H), 0.94 (s, 9H).

$^{13}\text{C}$  NMR (126 MHz,  $\text{CDCl}_3$ )  $\delta$  163.7, 157.78 (d,  $J = 249.2$ ), 157.74 (d,  $J = 249.2$ ), 142.6, 139.0, 128.8, 125.2 (t,  $J = 9.6$  Hz), 120.6 (d,  $J = 3.0$  Hz), 117.2 (d,  $J = 15.7$  Hz), 112.2 (d,  $J = 4.8$  Hz), 112.0 (d,  $J = 4.7$  Hz), 76.3, 67.8, 33.9, 25.8.

HRMS (ESI)  $[\text{M}+\text{H}]^+$  calcd for  $\text{C}_{18}\text{H}_{20}\text{F}_2\text{N}_3\text{O}$ : 331.1496, found: 331.1490.

**(S)-2-(4-(tert-butyl)-4,5-dihydrooxazol-2-yl)-N-(4-fluorophenyl)-N-methylpyridin-3-amine (NMeNL11)**

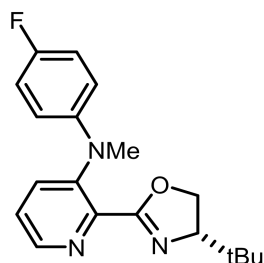

Yellow oil, 24.9 mg, 38% yield.

$^1\text{H}$  NMR (500 MHz,  $\text{CDCl}_3$ )  $\delta$  8.55-8.53 (m, 1H), 7.62-7.60 (m, 1H), 7.43-7.40 (m, 1H), 6.88-6.84 (m, 2H), 6.58-6.55 (m, 2H), 4.16-4.12 (m, 1H), 3.95-3.91 (m, 1H), 3.89-3.84 (m, 1H), 3.26 (s, 3H), 0.79 (s, 9H).

$^{13}\text{C}$  NMR (126 MHz,  $\text{CDCl}_3$ )  $\delta$  161.4, 156.7 (d,  $J = 237.1$  Hz), 146.2, 145.3 (d,  $J = 8.8$  Hz), 144.9, 136.6, 129.1 (d,  $J = 9.1$  Hz), 126.3, 116.3 (d,  $J = 7.7$  Hz), 115.5 (d,  $J = 22.4$  Hz), 76.6, 68.8, 40.9, 33.6, 26.0.

HRMS (ESI)  $[\text{M}+\text{H}]^+$  calcd for  $\text{C}_{19}\text{H}_{23}\text{FN}_3\text{O}$ : 328.1820 found: 328.1828.

**(S)-N-(2-(4-(tert-butyl)-4,5-dihydrooxazol-2-yl)pyridin-3-yl)pyridin-2-amine (ZNL1)**

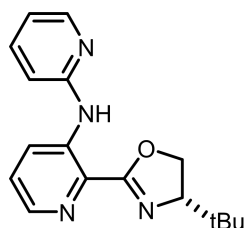

Yellow oil, 50.3 mg, 85% yield.

$^1\text{H}$  NMR (400 MHz,  $\text{CDCl}_3$ )  $\delta$  11.85 (s, 1H), 9.34 (dd,  $J_1 = 8.7$ ,  $J_2 = 1.5$  Hz, 1H), 8.30 – 8.28 (m, 1H), 8.22 (dd,  $J_1 = 4.4$ ,  $J_2 = 1.5$  Hz, 1H), 7.59 – 7.54 (m, 1H), 7.35 (dd,  $J_1 = 8.7$ ,  $J_2 = 4.4$  Hz, 1H), 6.84 (dd,  $J_1 = 5.0$ ,  $J_2 = 0.9$  Hz, 1H), 6.77 (d,  $J = 8.2$  Hz, 1H), 4.53 – 4.37 (m, 1H), 4.33 – 4.21 (m, 2H), 1.02 (s, 9H).

$^{13}\text{C}$  NMR (101 MHz,  $\text{CDCl}_3$ )  $\delta$  164.0, 155.2, 147.7, 140.7, 140.3, 137.7, 129.7, 126.3, 125.3, 116.2, 113.1, 76.5, 67.9, 34.1, 26.1.

HRMS (ESI)  $[\text{M}+\text{H}]^+$  calcd for  $\text{C}_{17}\text{H}_{21}\text{N}_4\text{O}$ : 297.1710 found: .297.1714

**(S)-N-(2-(4-(*tert*-butyl)-4,5-dihydrooxazol-2-yl)pyridin-3-yl)pyrimidin-2-amine**  
**(ZNL2)**

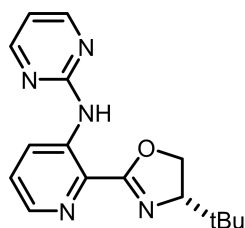

Yellow oil, 52.9 mg, 89% yield.

$^1\text{H}$  NMR (400 MHz,  $\text{CDCl}_3$ )  $\delta$  12.28 (s, 1H), 9.30 (dd,  $J_1 = 8.7$ ,  $J_2 = 1.5$  Hz, 1H), 8.48 (d,  $J = 4.8$  Hz, 2H), 8.28 (dd,  $J_1 = 4.4$ ,  $J_2 = 1.5$  Hz, 1H), 7.38 (dd,  $J_1 = 8.7$ ,  $J_2 = 4.4$  Hz, 1H), 6.78 (t,  $J = 4.8$  Hz, 1H), 4.43 – 4.39 (m, 1H), 4.31 – 4.28 (m, 2H), 1.02 (s, 9H).

$^{13}\text{C}$  NMR (101 MHz,  $\text{CDCl}_3$ )  $\delta$  163.3, 160.3, 158.0, 141.1, 139.4, 130.6, 126.02, 125.98, 113.6, 76.5, 68.0, 34.2, 26.0.

HRMS (ESI)  $[\text{M}+\text{H}]^+$  calcd for  $\text{C}_{16}\text{H}_{20}\text{N}_5\text{O}$ : 298.1662 found: .298.1665

**(S)-2-(4-(*tert*-butyl)-4,5-dihydrooxazol-2-yl)-N-cyclohexylpyridin-3-amine**  
**(ZNL3)**

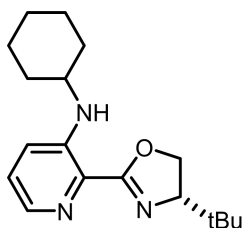

Yellow oil, 53.5 mg, 89% yield.

$^1\text{H}$  NMR (400 MHz,  $\text{CDCl}_3$ )  $\delta$  8.67 (s, 1H), 7.91 (dd,  $J_1 = 4.3$ ,  $J_2 = 1.4$  Hz, 1H), 7.14 (dd,  $J_1 = 8.6$ ,  $J_2 = 4.3$  Hz, 1H), 7.02 (dd,  $J_1 = 8.8$ ,  $J_2 = 1.4$  Hz, 1H), 4.37 – 4.30 (m, 1H), 4.20 – 4.13 (m, 2H), 3.38 – 3.21 (m, 1H), 2.20 – 1.94 (m, 2H), 1.79 – 1.74 (m, 2H), 1.62 – 1.57 (m, 1H), 1.43 – 1.27 (m, 5H), 0.94 (s, 9H).

$^{13}\text{C}$  NMR (101 MHz,  $\text{CDCl}_3$ )  $\delta$  163.8, 145.3, 135.7, 127.2, 126.2, 118.1, 76.5, 67.4, 50.3, 34.0, 32.8, 32.7, 26.0, 25.9, 24.6, 24.4.

HRMS (ESI)  $[\text{M}+\text{H}]^+$  calcd for  $\text{C}_{18}\text{H}_{28}\text{N}_3\text{O}$ : 302.2227 found: 302.2235

**(S)-4-(tert-butyl)-2-(3-(4-fluorophenoxy)pyridin-2-yl)-4,5-dihydrooxazole (OL11)**

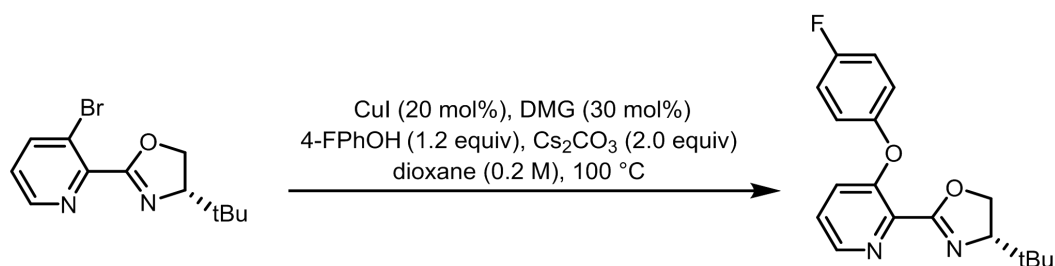

Yellow oil, 20.1 mg, 32% yield.

$^1\text{H}$  NMR (500 MHz,  $\text{CDCl}_3$ )  $\delta$  8.43-8.42 (m, 1H), 7.32-7.26 (m, 2H), 6.99-6.84 (m, 4H), 4.29 (dd,  $J_1 = 10.1$  Hz,  $J_2 = 8.5$  Hz, 1H), 4.15-4.02 (m, 2H), 0.79 (s, 9H).

$^{13}\text{C}$  NMR (101 MHz,  $\text{CDCl}_3$ )  $\delta$  160.0, 159.0 (d,  $J = 242.1$  Hz), 153.0, 152.9 (d,  $J = 2.5$  Hz), 144.9, 139.8, 128.2, 126.3, 119.7 (d,  $J = 8.4$  Hz), 116.5 (d,  $J = 23.4$  Hz), 77.0, 68.7, 34.0, 25.9.

HRMS (ESI)  $[\text{M}+\text{H}]^+$  calcd for  $\text{C}_{18}\text{H}_{20}\text{FN}_2\text{O}_2$ : 315.1503, found: 315.1510.

## 2.4 Analysis of substituted PyOx ligands for asymmetric transformations

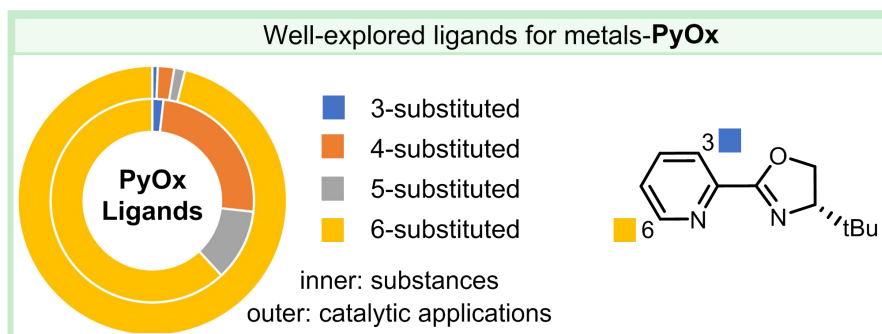

| 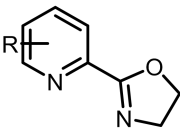 | Note                                                                   |
|-----------------------------------------------------------------------------------|------------------------------------------------------------------------|
| 3-substituted PyOx                                                                | 29 related substances<br>1 reference on asymmetric transformation      |
| 4-substituted PyOx                                                                | 411 related substances<br>3 references on asymmetric transformation    |
| 5-substituted PyOx                                                                | 187 related substances<br>2 references on asymmetric transformation    |
| 6-substituted PyOx                                                                | 1018 related substances<br>146 references on asymmetric transformation |

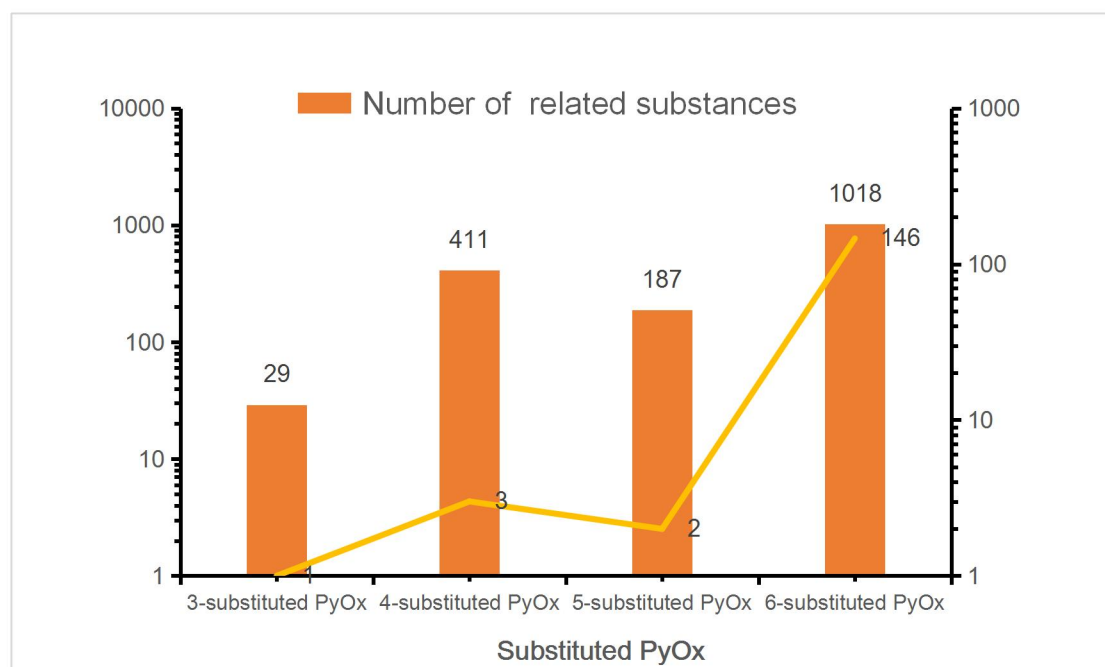

Scifinder search profiles of the non-ring fused PyOx ligands in asymmetric transformations were listed below (accessed on 08/29/2022)

### 3. Asymmetric addition of arylboronic acid to *N*-Cbz-4-quinolone

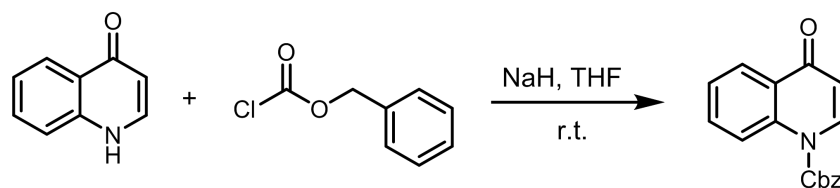

A solution of quinolin-4(1H)-ones (2.90 g, 20 mmol, 1 eq) in THF (20 mL) was added to a suspension of NaH (1.44 g, 60 mmol, 3 eq) in THF (15 mL) at room temperature, and the resulting mixture was stirred for 15 min at 55 °C. Benzyl chloroformate (3.73 mL, 30 mmol, 1.5 eq) was then added to it dropwise, and the mixture was stirred for 48 h at room temperature. The reaction was quenched with water and extracted with EtOAc. The organic layer was dried over Na<sub>2</sub>SO<sub>4</sub>, filtered, and concentrated under vacuum. The residue was chromatographed on silica gel with petroleum ether/EtOAc (5:1, v/v) to afford compound as a white solid (1.65 g, 59% yield).

<sup>1</sup>H NMR (400 MHz, CDCl<sub>3</sub>) δ δ 8.68 (d, *J*<sub>1</sub> = 9.0 Hz, 1H), 8.50 – 8.27 (m, 2H), 7.72 – 7.55 (m, 1H), 7.53 – 7.39 (m, 6H), 6.26 (d, *J* = 8.6 Hz, 1H), 5.47 (s, 2H).

The NMR data are in accordance with previously reported data (Org. Lett. 2022, 24, 5, 1228–1231.).

Unless otherwise mentioned, the other substituted *N*-Cbz-4-quinolone were synthesized according to this procedure.

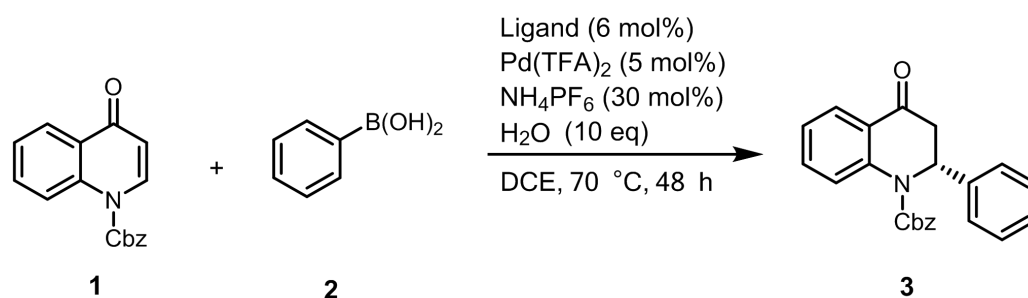

#### General procedure

Step 1: To a Schlenk tube charged Pd(TFA)<sub>2</sub> (1.7 mg, 5 mol%, 0.05 eq) and ligand (6 mol%, 0.06 eq) was added DCE (0.5 mL), The mixture was stirred at 70 °C (heating

mantle) for 2 h to afford the catalyst solution.

Step 2: To the above solution was added phenyl boronic acid (24.4 mg, 0.2 mmol, 2eq),  $\text{NH}_4\text{PF}_6$  (4.9 mg, 30 mol%, 0.3 eq), **1** (27.9 mg, 0.1 mmol, 1 eq) and  $\text{H}_2\text{O}$  (18  $\mu\text{L}$ , 10 eq). The wall of the tube was rinsed with DCE (0.5 mL) or some oil substrate was dissolved in DCE (0.5 mL) (The volume of solvent is 1.0 mL). The tube was placed in the modules of the reactor which was set at 70 °C (heating mantle) for 48 h, the reaction mixture was cooled to room temperature, and the solvent was removed by rotary evaporation. The residue was purified by column chromatography with petroleum ether/EtOAc (5/1, v/v) to give the product.

### 3.1 Establishment of the optimal condition

#### 3.1.1 Initial chiral ligands screening

**Table S1.** Initial Ligand evaluation

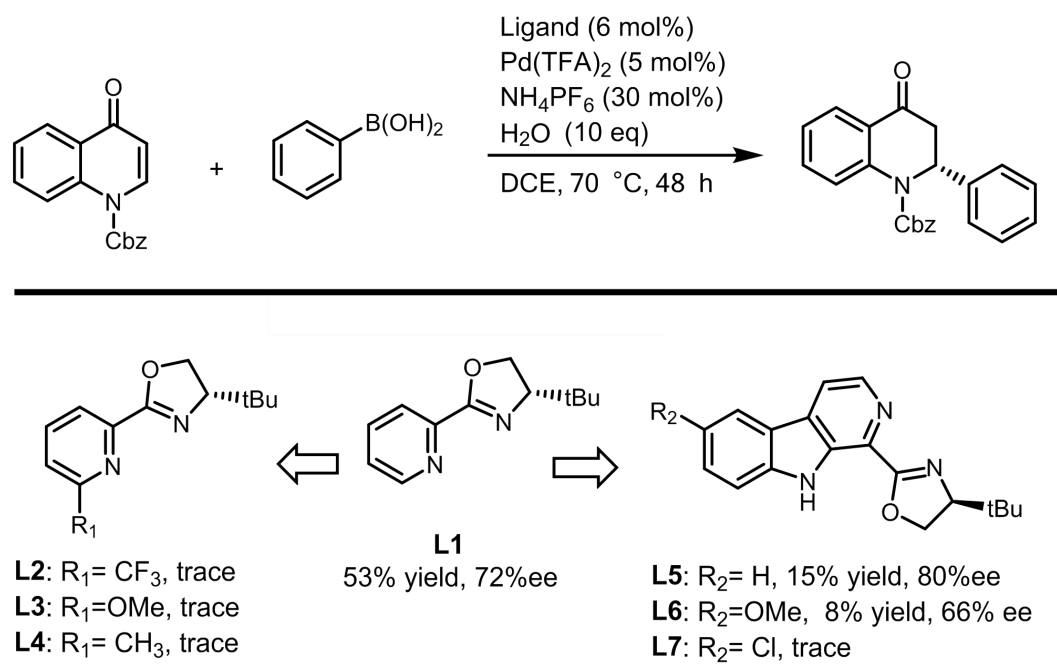

**Table S2.** Evaluation of Ligand loading

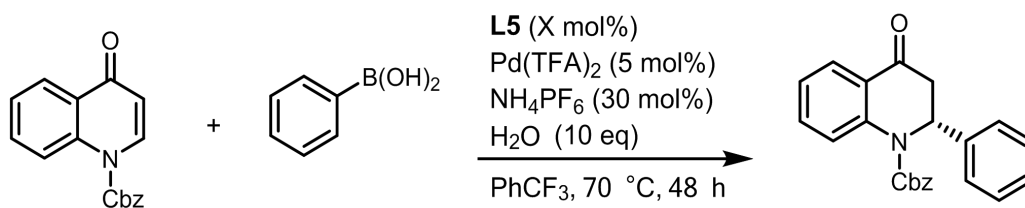

| Entry | Ligand / mol% | Yield <sup>a</sup> / % | ee <sup>b</sup> / % |
|-------|---------------|------------------------|---------------------|
| 1     | 5             | 28                     | 0                   |
| 2     | 6             | 15                     | 80                  |
| 3     | 7.5           | 15                     | 46                  |
| 4     | 10            | 22                     | 64                  |
| 5     | 12            | 42                     | 77                  |
| 6     | 15            | 48                     | 77                  |
| 7     | 20            | 28                     | 87                  |

*a* All reactions were run at 0.1 mmol scale. *b* Isolated yield and ee values were determined by HPLC on a chiral stationary phase.

### 3.1.2 Solvents screening

**Table S3.** Solvent effects

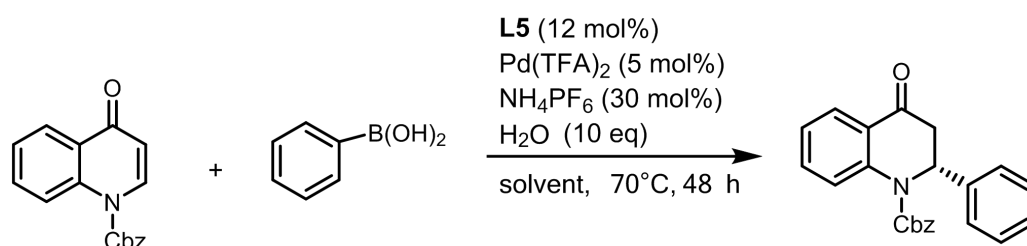



| Entry | Solvent                       | Yield <sup>a</sup> / % | ee <sup>b</sup> / % |
|-------|-------------------------------|------------------------|---------------------|
| 1     | MeOH                          | 56                     | 87                  |
| 2     | EtOH                          | 36                     | 83                  |
| 3     | IPA                           | 53                     | 69                  |
| 4     | HFIP                          | trace                  | N.T.                |
| 5     | Toluene                       | 53                     | 86                  |
| 6     | PhCl                          | 46                     | 84                  |
| 7     | DCB                           | 28                     | 27                  |
| 8.    | PhCF <sub>3</sub>             | 67                     | 92                  |
| 9     | DMB                           | trace                  | trace               |
| 10    | Benzene                       | 47                     | 80                  |
| 11    | DMF                           | 28                     | 89                  |
| 12    | DMSO                          | trace                  | N.T.                |
| 13    | DCE                           | 42                     | 77                  |
| 14    | THF                           | trace                  | N.T.                |
| 15    | MeOH: PhCF <sub>3</sub> (1:1) | 31                     | 86                  |
| 16    | H <sub>2</sub> O              | 11                     | 85                  |

|    |                             |       |      |
|----|-----------------------------|-------|------|
| 17 | PhNO <sub>2</sub>           | 39    | 65   |
| 18 | DMPU                        | trace | N.T. |
| 19 | DCE: H <sub>2</sub> O (1:1) | 22.4  | 85   |

*a* All reactions were run at 0.1 mmol scale. *b* Isolated yield and ee values were determined by HPLC on a chiral stationary phase.

### 3.1.3 Arylboronic acid loading

**Table S4.** Stoichiometry of arylboronic acid

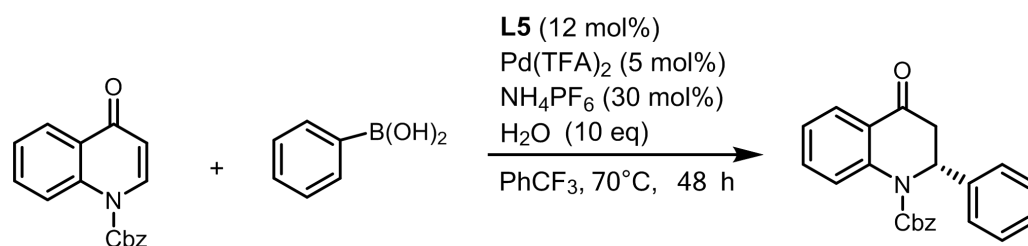

| Entry | PhB(OH) <sub>2</sub> / eq | Yield <sup>a</sup> / % | ee <sup>b</sup> / % |
|-------|---------------------------|------------------------|---------------------|
| 1     | 1                         | 34                     | 80                  |
| 2     | 2                         | 67                     | 92                  |
| 3     | 3                         | 63                     | 77                  |
| 4     | 4                         | 43                     | 85                  |

*a* All reactions were run at 0.1 mmol scale. *b* Isolated yield and ee values were determined by HPLC on a chiral stationary phase.

### 3.1.4 Ligands optimization based on L5

**Table S5.** Ligands optimization based on L5

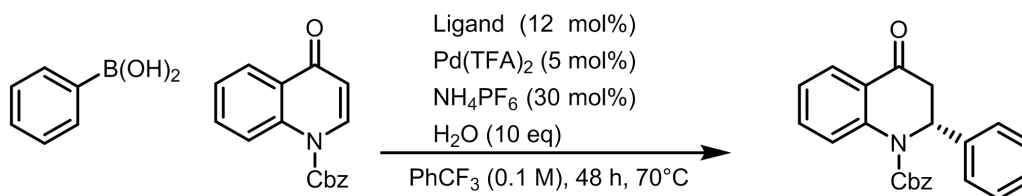

|                                |                 |                                |
|--------------------------------|-----------------|--------------------------------|
| <b>NL5:</b> 45% yield, 64% ee  | <p>X = N, O</p> | <b>NL14:</b> 84% yield, 80% ee |
| <b>NL8:</b> 31% yield, 92% ee  |                 | <b>NL15:</b> 56% yield, 84% ee |
| <b>NL9:</b> 53% yield, 89% ee  |                 | <b>OL11:</b> trace, N.T.       |
| <b>NL10:</b> 78% yield, 82% ee |                 | <b>NMeNL11:</b> trace, N.T.    |
| <b>NL11:</b> 95% yield, 73% ee |                 | <b>ZNL1:</b> trace, N.T.       |
| <b>NL12:</b> 59% yield, 59% ee |                 | <b>ZNL3:</b> trace, N.T.       |
| <b>NL13:</b> 70% yield, 80% ee |                 | <b>CL5:</b> trace, N.T.        |

*a* All reactions were run at 0.1 mmol scale. *b* Isolated yield and ee values were determined by HPLC on a chiral stationary phase.

### 3.1.5 Other parameters optimization

**Table S6.** Temperature influence

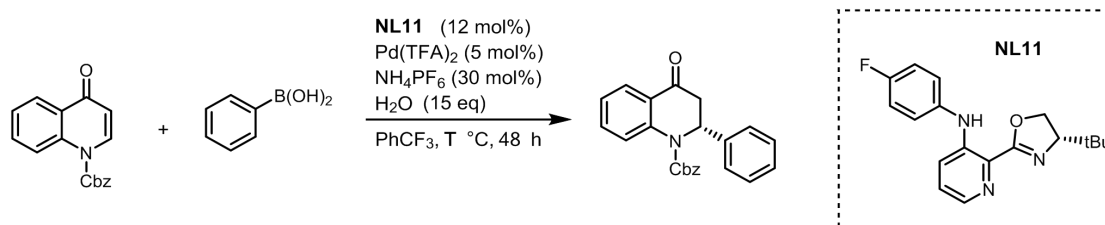

| Entry | T / °C | Yield <sup>a</sup> / % | ee <sup>b</sup> / % |
|-------|--------|------------------------|---------------------|
| 1     | 70     | 95                     | 73                  |
| 2     | 60     | 95                     | 91                  |
| 3     | 50     | 90                     | 95                  |

*a* All reactions were run at 0.1 mmol scale. *b* Isolated yield and ee values were

determined by HPLC on a chiral stationary phase.

**Table S7.** Metal Screening

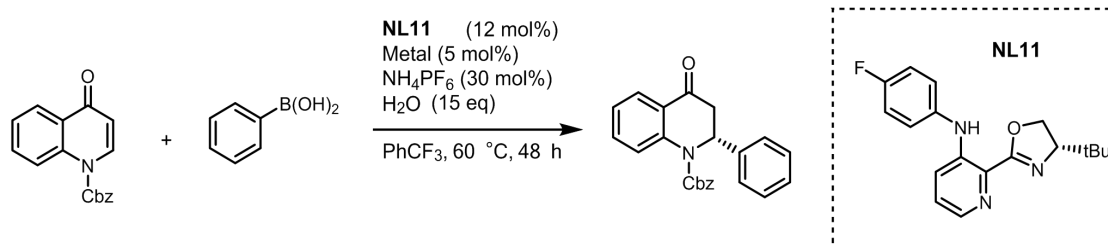

| Entry | Metal                                              | L2/mol% | Yield <sup>a</sup> / % | ee <sup>b</sup> / % |
|-------|----------------------------------------------------|---------|------------------------|---------------------|
| 1     | Pd(OAc) <sub>2</sub>                               | 12      | 78                     | 87                  |
| 2     | PdCl <sub>2</sub>                                  | 12      | trace                  | --                  |
| 3     | (Ph <sub>3</sub> P) <sub>2</sub> PdCl <sub>2</sub> | 12      | trace                  | --                  |
| 4     | Cu(OAc) <sub>2</sub> ·H <sub>2</sub> O             | 12      | trace                  | --                  |
| 5     | AgTFA                                              | 12      | trace                  | --                  |
| 6     | Pd(TFA) <sub>2</sub>                               | 12      | 95                     | 91                  |
| 7     | Pd(TFA) <sub>2</sub>                               | 6       | 70                     | 87                  |
| 8     | Pd(TFA) <sub>2</sub>                               | 7.5     | 84                     | 89                  |
| 9     | Pd(TFA) <sub>2</sub>                               | 10      | 89                     | 86                  |

<sup>a</sup> All reactions were run at 0.1 mmol scale. <sup>b</sup> Isolated yield and ee values were determined by HPLC on a chiral stationary phase.

**Table S8.** Screening of additives

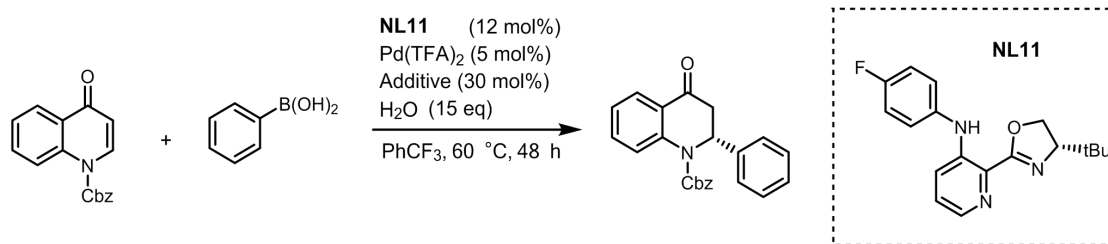

| Entry     | Additive                                              | Additive/mol% | Yield <sup>a</sup> / % | ee <sup>b</sup> / % |
|-----------|-------------------------------------------------------|---------------|------------------------|---------------------|
| 1         | NH <sub>4</sub> BF <sub>4</sub>                       | 30            | 59                     | 77                  |
| 2         | NaSbF <sub>6</sub>                                    | 30            | 56                     | 75                  |
| 3         | Ag <sub>2</sub> CO <sub>3</sub>                       | 30            | 56                     | 93                  |
| 4         | B(C <sub>6</sub> F <sub>5</sub> ) <sub>3</sub>        | 30            | 70                     | 81                  |
| 5         | 4-FPhNH <sub>2</sub>                                  | 30            | 11                     | 93                  |
| 6         | NH <sub>4</sub> PF <sub>6</sub> +4-FPhNH <sub>2</sub> | 30:12         | 78                     | 89                  |
| 7         | NH <sub>4</sub> PF <sub>6</sub>                       | 0             | 78                     | 88                  |
| 8         | NH <sub>4</sub> PF <sub>6</sub>                       | 10            | 84                     | 95                  |
| 9         | NH <sub>4</sub> PF <sub>6</sub>                       | 20            | 92                     | 93                  |
| <b>10</b> | <b>NH<sub>4</sub>PF<sub>6</sub></b>                   | <b>30</b>     | <b>95</b>              | <b>91</b>           |
| 11        | NH <sub>4</sub> PF <sub>6</sub>                       | 40            | 95                     | 83                  |
| 12        | NH <sub>4</sub> PF <sub>6</sub>                       | 50            | 78                     | 90                  |

<sup>a</sup> All reactions were run at 0.1 mmol scale. <sup>b</sup> Isolated yield and ee values were determined by HPLC on a chiral stationary phase.

**Table S9.** Stoichiometry of H<sub>2</sub>O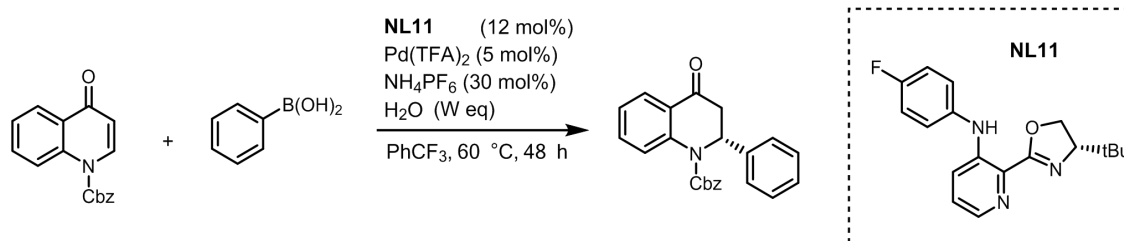

| Entry | H <sub>2</sub> O / eq | Yield <sup>a</sup> / % | ee <sup>b</sup> / % |
|-------|-----------------------|------------------------|---------------------|
| 1     | 0                     | 84                     | 92                  |
| 2     | 5                     | 95                     | 89                  |
| 3     | 10                    | 95                     | 91                  |
| 5     | 20                    | 95                     | 92                  |

<sup>a</sup> All reactions were run at 0.1 mmol scale. <sup>b</sup> Isolated yield and ee values were determined by HPLC on a chiral stationary phase.

### 3.2 Substrate scope

**Table S10.** Substrate scope for asymmetric addition of arylboronic acids to quinolones

### Substrate Scope for Pd Catalyzed Hayashi-Miyaura Coupling

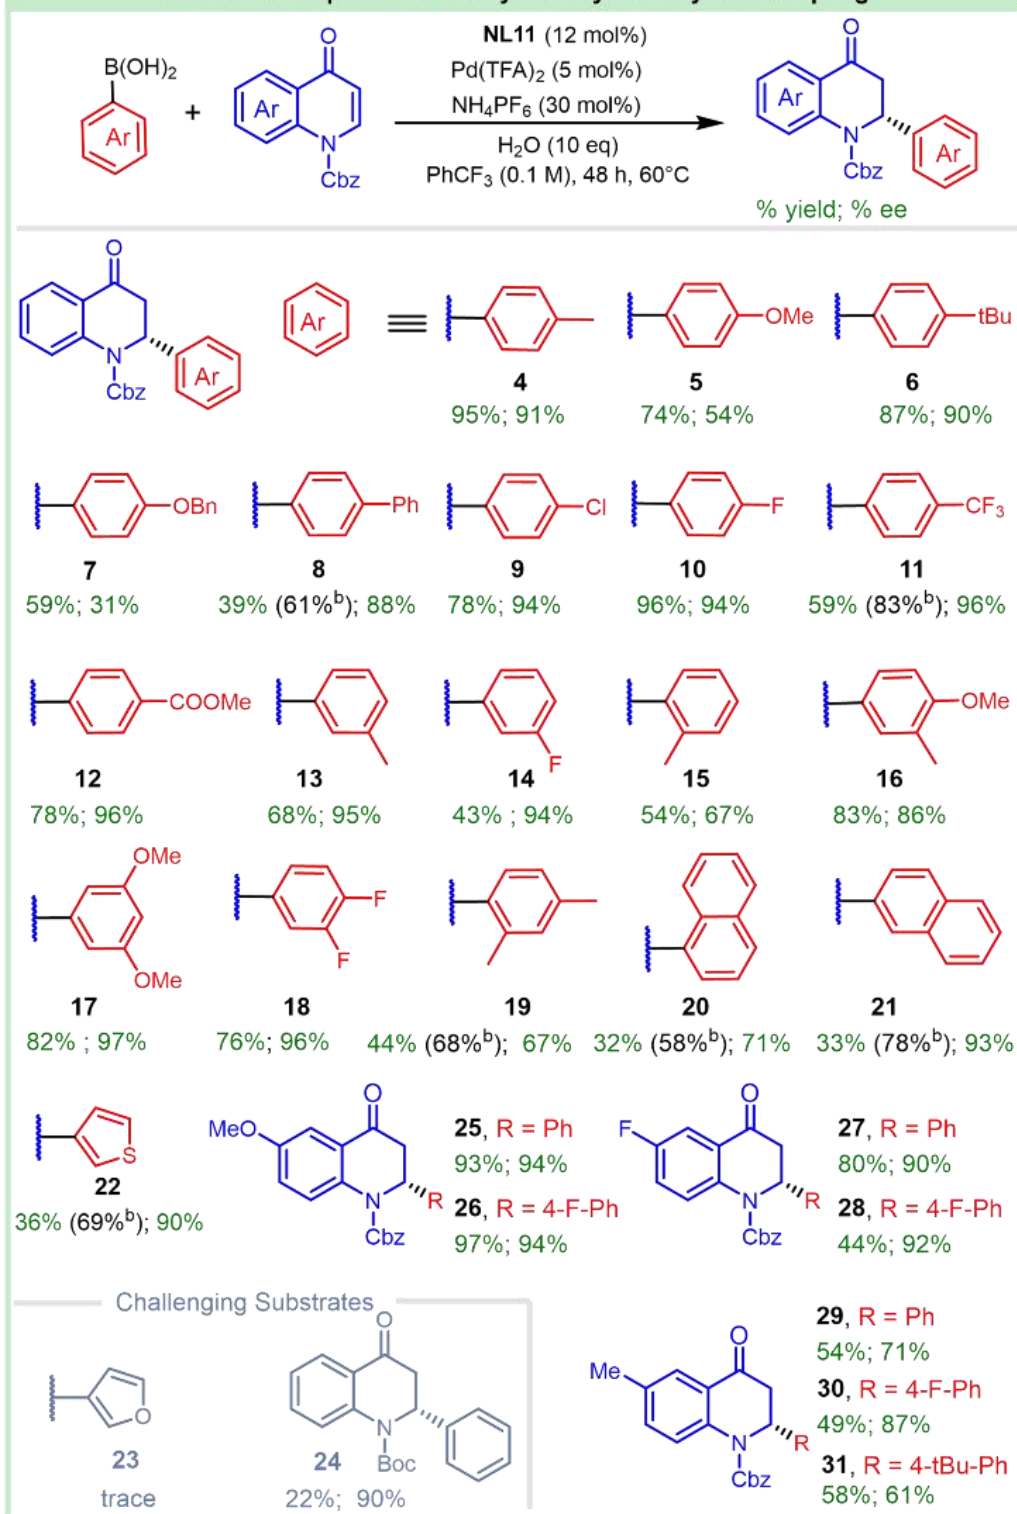

<sup>a</sup> Unless otherwise mentioned, the yields refer to the isolated yield, and the ee values were determined by HPLC on a chiral phase.

<sup>b</sup> Yield brsm.

### 3.3 Asymmetric addition of aryboronic acid to chromone by NL11

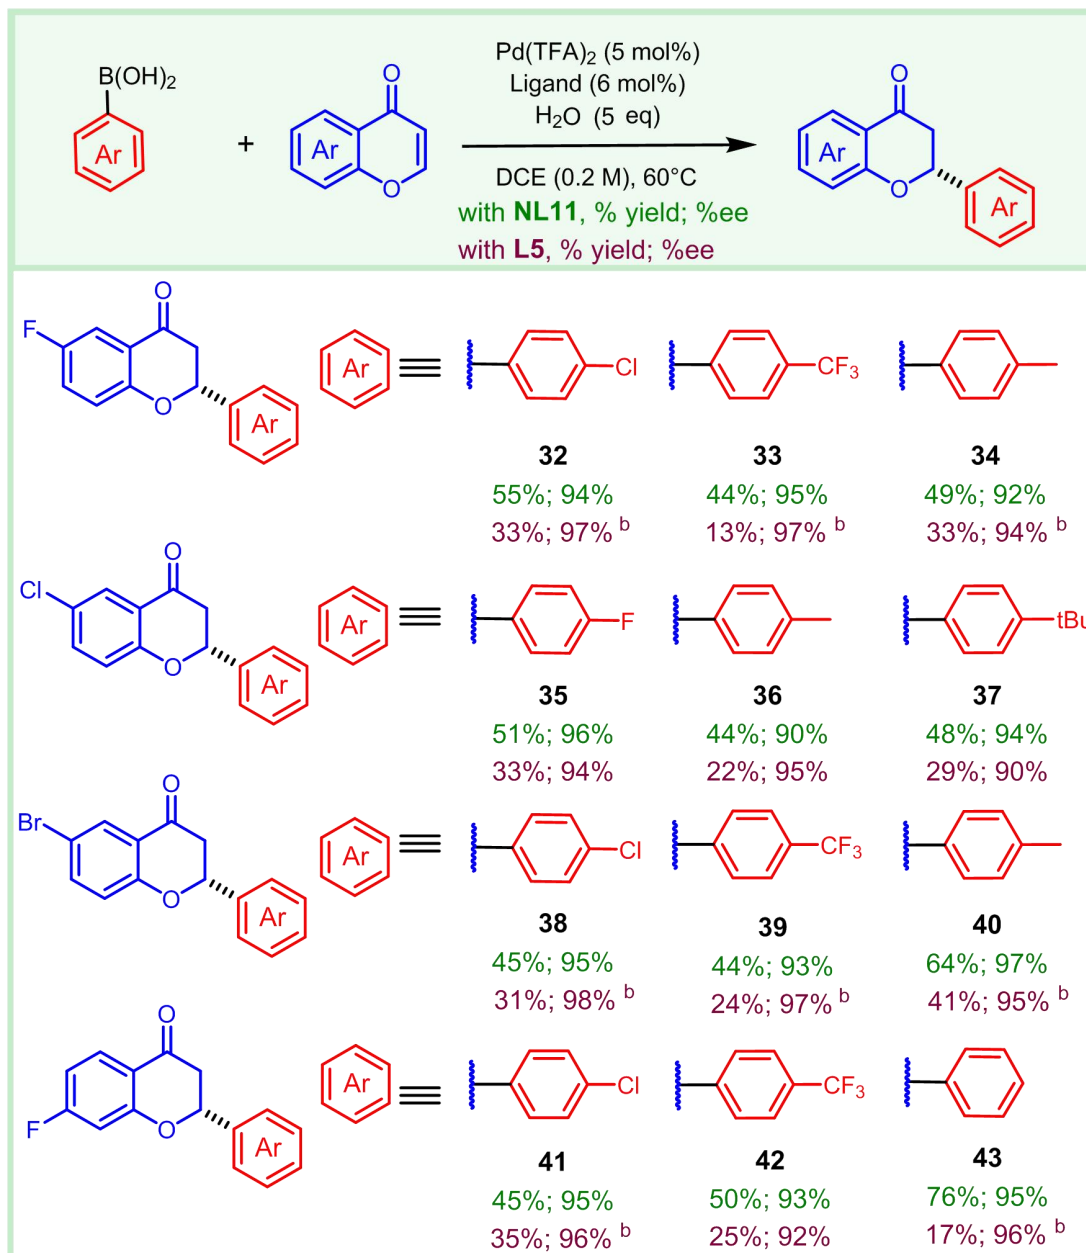

### 4. Procedure for the Synthesis of 10 on a 1-mmol-scale

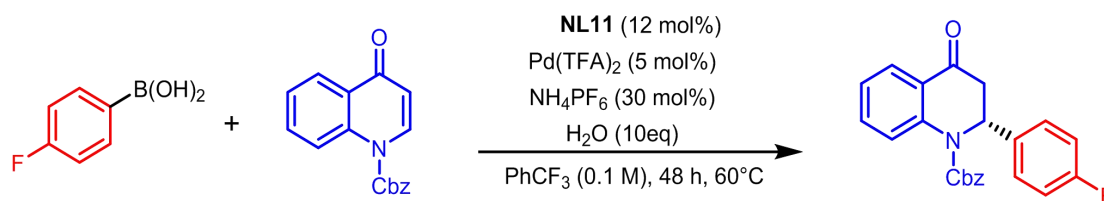



Step 1: To a Schlenk tube charged Pd(TFA)<sub>2</sub> (17 mg, 5 mol%) and NL11 (37 mg, 12 mol%) was added DCE (5.0 mL), The mixture was stirred at 60 °C (heating mantle) for 2 h to afford the catalyst solution.

Step 2: To the above solution was added 4F-phenyl boronic acid (280 mg, 2.0 mmol), NH<sub>4</sub>PF<sub>6</sub> (49 mg, 30 mol%), **1** (279 mg, 1 mmol) and H<sub>2</sub>O (180 μL, 10 eq). The wall of the tube was rinsed with DCE (5.0 mL) or some oil substrate was dissolved in DCE (0.5 mL) (The volume of solvent is 1.0 mL). The tube was placed in the modules of the reactor which was set at 60 °C (heating mantle) for 48 h, the reaction mixture was cooled to room temperature, and the solvent was removed by rotary evaporation. The residue was purified by column chromatography with petroleum ether/EtOAc (5/1, v/v) to give the product (325 mg, 87% yield).

## 5. Spectroscopic data for 2-phenyl-3,4-dihydroquinolines

### (*R*)-benzyl 4-oxo-2-phenyl-3,4-dihydroquinoline-1(2H)-carboxylate (**3**)

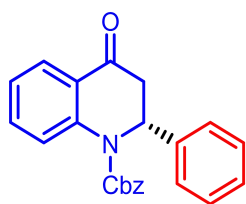

Yellow solid (95% isolated yield, 33.9 mg, 0.1 mmol), mp: 149.0-151.7 °C, column chromatography purification using petroleum ether/EtOAc (10:1, v/v) as eluents.

<sup>1</sup>H NMR (400 MHz, CDCl<sub>3</sub>) δ 7.81 (dd, *J*<sub>1</sub> = 7.8 Hz, *J*<sub>2</sub> = 1.7 Hz, 1H), 7.72 (d, *J* = 8.4 Hz, 1H), 7.38-7.25 (m, 6H), 7.14-7.06 (m, 5H), 7.00-6.96 (m, 1H), 6.16 (dd, *J*<sub>1</sub> = 4.8 Hz, *J*<sub>2</sub> = 3.2 Hz, 1H), 5.32 (d, *J* = 12.2 Hz, 1H), 5.24 (d, *J* = 12.3 Hz, 1H), 3.22-3.21 (m, 2H).

$^{13}\text{C}$  NMR (101 MHz,  $\text{CDCl}_3$ )  $\delta$  192.8, 154.4, 141.6, 138.2, 135.7, 134.7, 128.8, 128.7, 128.6, 128.3, 127.7, 127.0, 126.7, 125.2, 124.5, 124.3, 68.6, 56.2, 42.4.

$[\alpha]_{\text{D}}^{21} = +78.6^\circ$  ( $c$  0.1, MeOH).

HRMS (ESI)  $[\text{M}+\text{H}]^+$  calcd for  $\text{C}_{23}\text{H}_{20}\text{NO}_3$ : 358.1438, found: 358.1429.

HPLC Conditions: IPA/Hexanes (10:90), 1.0 mL/min, Daicel Chiralpak OD-H column,  $\lambda = 220$  nm,  $t_{\text{R}}$  (min): minor = 13.0 min, major = 16.2 min; ee = 91%.

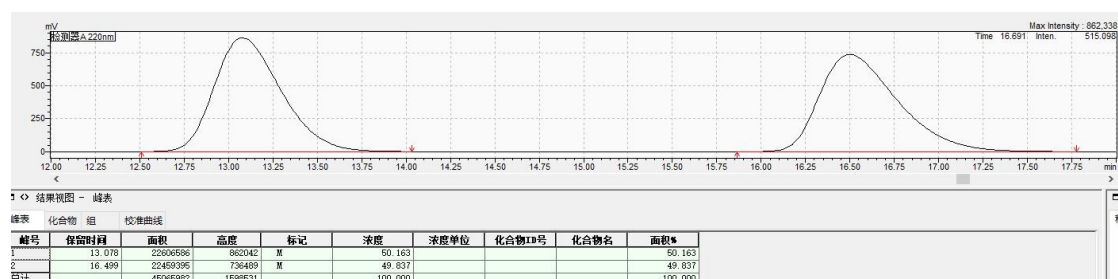

Annotation: Peak number (峰号), Retention Time (min) (保留时间), Area ( $\text{mV} \cdot \text{min}$ ) (面积), Height (mV) (高度), Labeled peak (标记), Concentration (浓度) and Relative Area (%) (面积%).

**(R)- benzyl 4-oxo-2-(p-tolyl)-3,4-dihydroquinoline-1(2H)-carboxylate (4)**

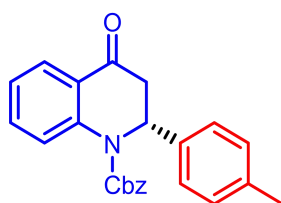

Yellow solid (95% isolated yield, 35.2 mg, 0.1 mmol), mp: 108.8-111.4  $^\circ\text{C}$ , column chromatography purification using petroleum ether/EtOAc (10:1, v/v) as eluents.

The NMR data and HRMS data are in accordance with that of previous publications (*Eur. J. Org. Chem.* 2011, 8, 1443–1446.)

$^1\text{H}$  NMR (500 MHz,  $\text{CDCl}_3$ )  $\delta$  7.90 (dd,  $J_1 = 7.8$  Hz,  $J_2 = 1.7$  Hz, 1H), 7.80 (d,  $J = 8.5$  Hz, 1H), 7.46-7.33 (m, 7H), 7.09-7.06 (m, 2H), 7.01 (d,  $J = 8.0$  Hz, 2H), 6.21 (t,  $J = 4.0$  Hz, 1H), 5.40 (d,  $J = 12.4$  Hz, 1H), 5.33 (d,  $J = 12.4$  Hz, 1H), 3.32-3.24 (m, 2H), 2.23 (s, 3H).

$^{13}\text{C}$  NMR (101 MHz,  $\text{CDCl}_3$ )  $\delta$  192.9, 154.1, 141.4, 139.8, 135.7, 134.7, 128.9, 128.7, 128.4, 127.1, 126.7, 126.6, 125.0, 124.4, 124.3, 122.7, 68.7, 53.8, 43.2, 29.8.

HRMS (ESI)  $[\text{M}+\text{H}]^+$  calcd for  $\text{C}_{24}\text{H}_{22}\text{NO}_3$ : 372.1594, found: 372.1588.

$[\alpha]_{\text{D}}^{21} = +51.6^\circ$  ( $c$  0.1, MeOH).

HPLC Conditions: IPA/ Hexanes (10:90), 1.0 mL/min, Daicel Chiralpak OD-H column,  $\lambda = 220$  nm,  $t_{\text{R}}$  (min): minor = 10.9 min, major = 14.9 min; ee = 91%.

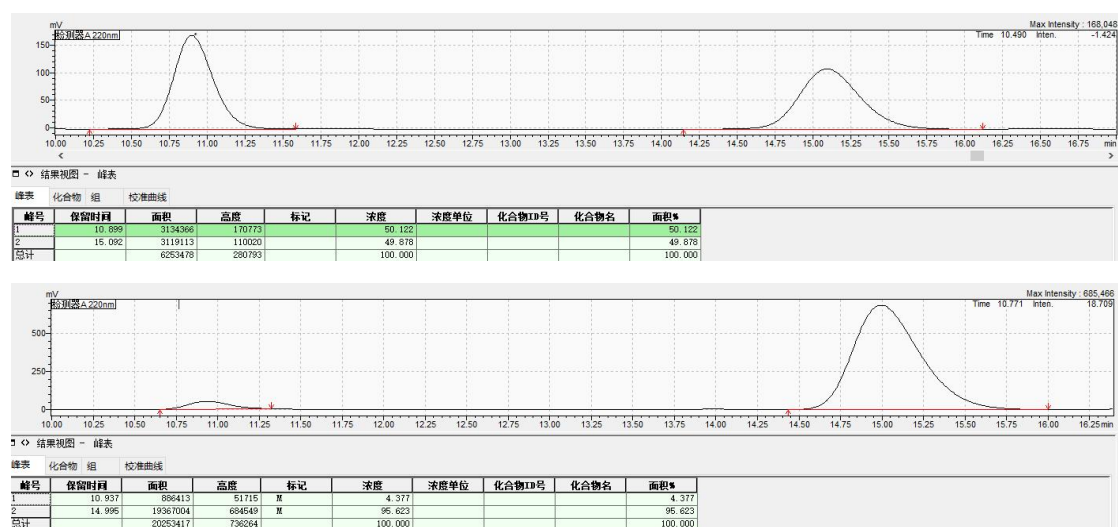

Annotation: Peak number (峰号), Retention Time (min) (保留时间), Area (mV\*min) (面积), Height (mV) (高度), Labeled peak (标记), Concentration (浓度) and Relative Area (%) (面积%).

**(R)-benzyl 2-(4-methoxyphenyl)-4-oxo-3,4-dihydroquinoline-1(2H)-carboxylate**

(5)

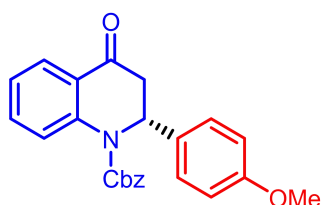

Yellow solid (74% isolated yield, 28.6 mg, 0.1 mmol), column chromatography purification using petroleum ether/EtOAc (10:1, v/v) as eluents.

$^1\text{H}$  NMR (500 MHz,  $\text{CDCl}_3$ )  $\delta$  7.90 (dd,  $J_1 = 7.7$  Hz,  $J_2 = 1.7$  Hz, 1H), 7.77 (d,  $J = 8.6$  Hz, 1H), 7.46-7.35 (m, 6H), 7.11-7.07 (m, 3H), 6.72 (d,  $J = 8.7$  Hz, 2H), 6.19 (t,  $J = 4.0$  Hz, 1H), 5.40 (d,  $J = 12.2$  Hz, 1H), 5.32 (d,  $J = 12.3$  Hz, 1H), 3.70 (s, 3H), 3.27 (d,  $J = 4.0$  Hz, 2H).

$^{13}\text{C}$  NMR (126 MHz,  $\text{CDCl}_3$ )  $\delta$  193.2, 159.0, 154.4, 141.5, 135.7, 134.7, 130.1, 128.8, 128.6, 128.3, 127.9, 126.9, 125.2, 124.6, 124.3, 114.1, 68.6, 55.8, 55.3, 42.6.

HRMS (ESI)  $[\text{M}+\text{H}]^+$  calcd for  $\text{C}_{24}\text{H}_{22}\text{NO}_4$ : 388.1543, found: 388.1537.

$[\alpha]_{\text{D}}^{28} = +60.3^\circ$  ( $c$  0.1, MeOH).

HPLC Conditions: IPA/ Hexanes (20:90), 1.0 mL/min, Daicel Chiralpak IC column,  $\lambda = 220$  nm,  $t_{\text{R}}$  (min): minor = 13.5 min, major = 16.1 min; ee = 54%.

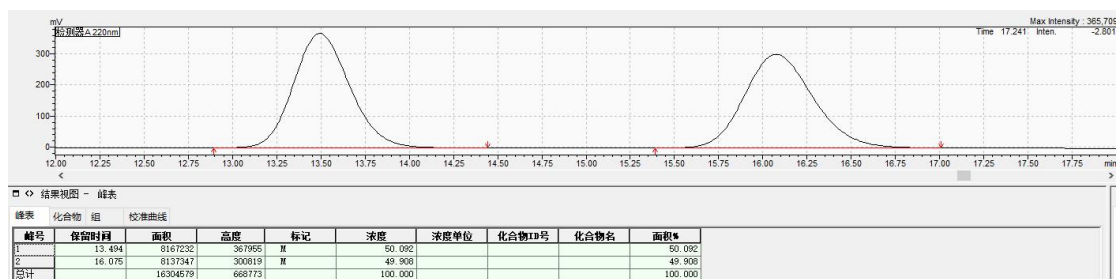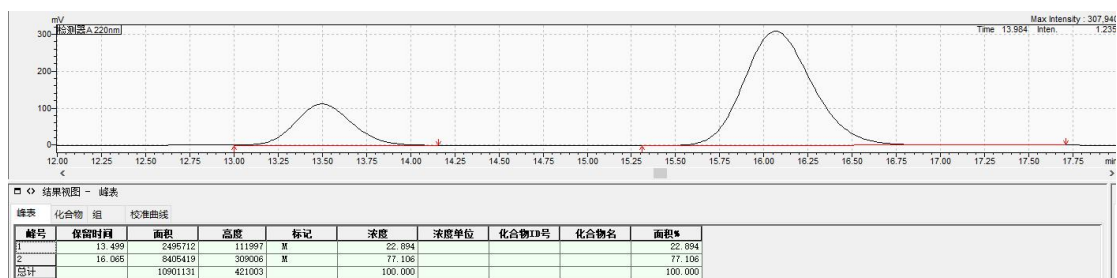

Annotation: Peak number (峰号), Retention Time (min) (保留时间), Area (mV\*min) (面积), Height (mV) (高度), Labeled peak (标记), Concentration (浓度) and Relative Area (%) (面积%).

(*R*)-benzyl

2-(4-(*tert*-butyl)phenyl)-4-oxo-3,4-dihydroquinoline-1(2H)-carboxylate (6)

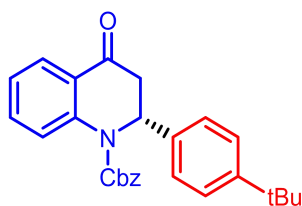

White solid (87% isolated yield, 35.9 mg, 0.1 mmol), mp: 106.9-108.2 °C, column chromatography purification using petroleum ether/EtOAc (10:1, v/v) as eluents.

$^1\text{H}$  NMR (500 MHz,  $\text{CDCl}_3$ )  $\delta$  7.91 (dd,  $J_1 = 7.8$  Hz,  $J_2 = 1.8$  Hz, 1H), 7.85 (d,  $J = 8.5$  Hz, 1H), 7.50-7.44 (m, 1H), 7.41-7.35 (m, 5H), 7.23-7.21 (m, 2H), 7.11-7.07 (m, 3H), 6.21 (t,  $J = 4.1$  Hz, 1H), 5.40 (d,  $J = 12.4$  Hz, 1H), 5.32 (d,  $J = 12.4$  Hz, 1H), 3.29 (d,  $J = 4.0$  Hz, 2H), 1.22 (s, 9H).

$^{13}\text{C}$  NMR (126 MHz,  $\text{CDCl}_3$ )  $\delta$  193.0, 154.5, 150.6, 141.8, 135.8, 135.1, 134.7, 128.8, 128.6, 128.3, 127.0, 126.4, 125.7, 125.2, 124.5, 124.2, 68.6, 56.1, 42.6, 34.5, 31.3.

HRMS (ESI)  $[\text{M}+\text{H}]^+$  calcd for  $\text{C}_{27}\text{H}_{28}\text{NO}_3$ : 414.2064, found: 414.2056.

$[\alpha]_{\text{D}}^{22} = +63.9^\circ$  ( $c$  0.1,  $\text{CHCl}_3$ ).

HPLC Conditions: IPA/ Hexanes (10:90), 1.0 mL/min, Daicel Chiralpak OD-H column,  $\lambda = 220$  nm,  $t_{\text{R}}$  (min): minor = 9.2 min, major = 12.3 min; ee = 90%.

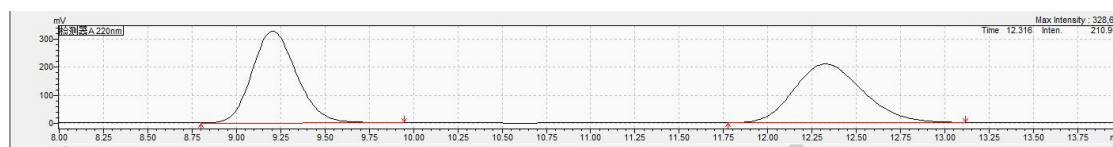

| 峰号 | 保留时间   | 面积       | 高度     | 标记 | 浓度      | 浓度单位 | 化合物ID号 | 化合物名 | 面积%     |
|----|--------|----------|--------|----|---------|------|--------|------|---------|
| 1  | 9.205  | 6688102  | 326376 | M  | 50.348  |      |        |      | 50.348  |
| 2  | 12.325 | 6609549  | 208208 | M  | 49.652  |      |        |      | 49.652  |
| 总计 |        | 11297651 | 534584 |    | 100.000 |      |        |      | 100.000 |

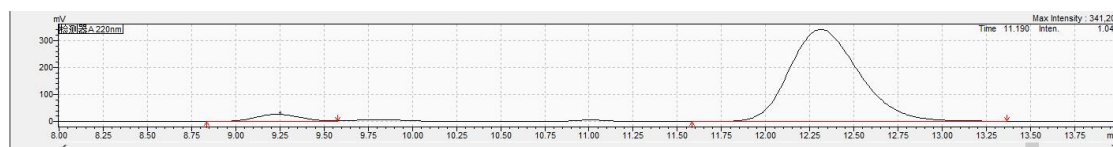

| 峰号 | 保留时间   | 面积      | 高度     | 标记 | 浓度      | 浓度单位 | 化合物ID号 | 化合物名 | 面积%     |
|----|--------|---------|--------|----|---------|------|--------|------|---------|
| 1  | 9.233  | 480722  | 26850  |    | 4.964   |      |        |      | 4.964   |
| 2  | 12.311 | 9203627 | 340296 | M  | 95.036  |      |        |      | 95.036  |
| 总计 |        | 9684350 | 367146 |    | 100.000 |      |        |      | 100.000 |

Annotation: Peak number (峰号), Retention Time (min) (保留时间), Area ( $\text{mV} \cdot \text{min}$ ) (面积), Height (mV) (高度), Labeled peak (标记), Concentration (浓度) and Relative Area (%) (面积%).

**(R)-benzyl 2-(4-(benzyloxy)phenyl)-4-oxo-3,4-dihydroquinoline-1(2H)-carboxylate (7)**

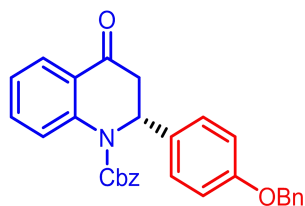

White solid (59% isolated yield, 27.3 mg, 0.1 mmol), mp: 148.8-151.7 °C, column chromatography purification using petroleum ether/EtOAc (10:1, v/v) as eluents.

Synthesized according to the general procedure and purified by flash chromatography (10:1 petroleum ether /EtOAc) to afford a white solid.

<sup>1</sup>H NMR (500 MHz, CDCl<sub>3</sub>) δ 7.90 (dd, *J*<sub>1</sub> = 7.9 Hz, *J*<sub>2</sub> = 1.7 Hz, 1H), 7.77 (d, *J* = 8.4 Hz, 1H), 7.48-7.28 (m, 11H), 7.14-7.04 (m, 3H), 6.80 (d, *J* = 8.9 Hz, 2H), 6.19 (t, *J* = 4.0 Hz, 1H), 5.40 (d, *J* = 12.3 Hz, 1H), 5.32 (d, *J* = 12.4 Hz, 1H), 4.94 (s, 2H), 3.27 (d, *J* = 4.0 Hz, 2H).

<sup>13</sup>C NMR (126 MHz, CDCl<sub>3</sub>) δ 193.1, 158.2, 154.4, 141.5, 136.8, 135.7, 134.7, 130.4, 128.8, 128.7, 128.6, 128.3, 128.2, 128.0, 127.6, 127.0, 125.2, 124.6, 124.3, 115.0, 70.0, 68.6, 55.8, 42.5.

HRMS (ESI) [M+H]<sup>+</sup> calcd for C<sub>30</sub>H<sub>26</sub>NO<sub>4</sub>: 464.1856, found: 464.1849.

[α]<sub>D</sub><sup>23</sup> = + 47.2° (c 0.1, MeOH).

HPLC Conditions: IPA/ Hexanes (10:90), 1.0 mL/min, Daicel Chiralpak OD-H column, λ = 220 nm, t<sub>R</sub> (min): minor = 36.0 min, major = 46.0 min; ee = 31%.

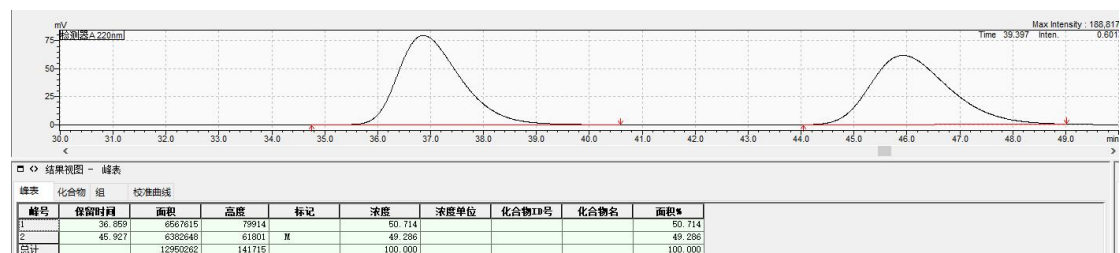

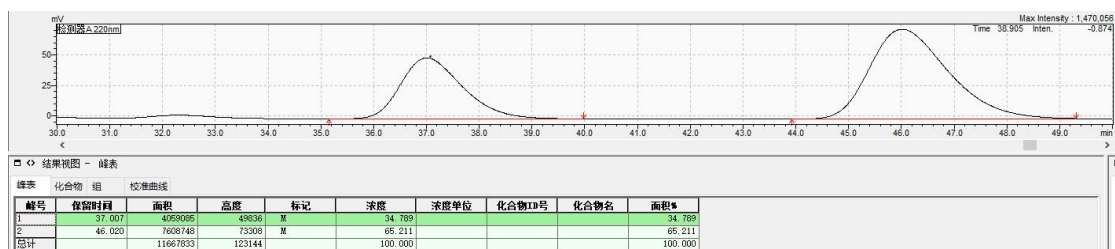

Annotation: Peak number (峰号), Retention Time (min) (保留时间), Area (mV\*min) (面积), Height (mV) (高度), Labeled peak (标记), Concentration (浓度) and Relative Area (%) (面积%).

**(R)-benzyl 2-([1,1'-biphenyl]-4-yl)-4-oxo-3,4-dihydroquinoline-1(2H)-carboxylate (8)**

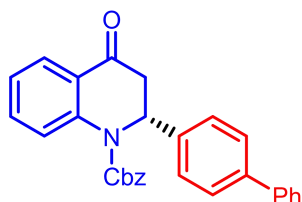

Yellow solid (39% isolated yield, 16.9 mg and 11.6 mg substrate, 0.1 mmol), mp: 167.5-169.6 °C, column chromatography purification using petroleum ether/EtOAc (10:1, v/v) as eluents.

<sup>1</sup>H NMR (400 MHz, CDCl<sub>3</sub>) δ 7.92 (dd, *J* = 7.9 Hz, 1.7 Hz, 1H), 7.84 (d, *J* = 8.4 Hz, 1H), 7.49-7.35 (m, 11H), 7.32-7.31 (m, 1H), 7.30-7.24 (m, 2H), 7.09 (t, *J* = 7.5 Hz, 1H), 6.28 (t, *J* = 4.0 Hz, 1H), 5.42 (d, *J* = 12.3 Hz, 1H), 5.34 (d, *J* = 12.3 Hz, 1H), 3.40-3.33 (m, 2H).

<sup>13</sup>C NMR (101 MHz, CDCl<sub>3</sub>) δ 192.8, 154.5, 141.7, 140.6, 140.4, 137.2, 135.7, 134.8, 128.9, 128.8, 128.7, 128.3, 127.6, 127.5, 127.2, 127.1, 125.2, 124.6, 124.4, 68.7, 56.2, 42.5.

HRMS (ESI) [M+H]<sup>+</sup> calcd for C<sub>29</sub>H<sub>24</sub>NO<sub>3</sub>: 434.1751, found: 434.1724.

[α]<sub>D</sub><sup>20</sup> = +63.8° (*c* 0.1, MeOH).

HPLC Conditions: IPA/ Hexanes (10:90), 1.0 mL/min, Daicel Chiralpak OD-H column, λ = 220 nm, t<sub>R</sub> (min): minor = 19.6 min, major = 26.5 min; ee = 88%.

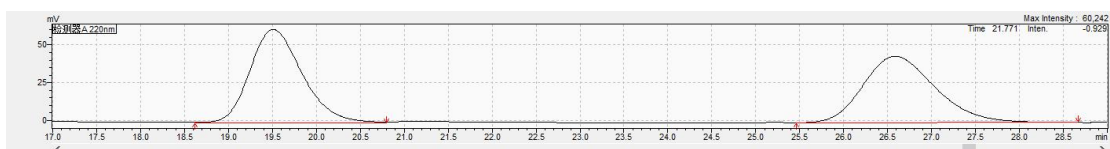

| 峰号 | 保留时间   | 面积      | 高度     | 标记 | 浓度      | 浓度单位 | 化合物ID号 | 化合物名 | 面积%     |
|----|--------|---------|--------|----|---------|------|--------|------|---------|
| 1  | 19.509 | 2690314 | 61701  | I  | 50.306  |      |        |      | 50.306  |
| 2  | 26.587 | 2519362 | 44022  | II | 49.695  |      |        |      | 49.695  |
| 总计 |        | 5069696 | 106724 |    | 100.000 |      |        |      | 100.000 |

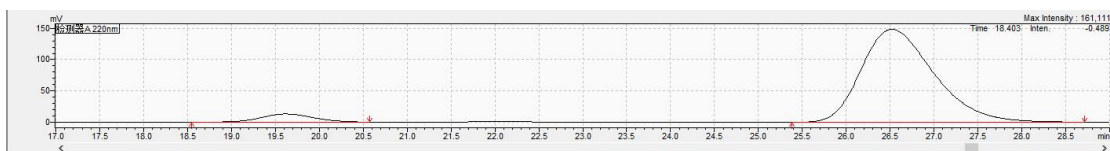

| 峰号 | 保留时间   | 面积      | 高度     | 标记 | 浓度      | 浓度单位 | 化合物ID号 | 化合物名 | 面积%     |
|----|--------|---------|--------|----|---------|------|--------|------|---------|
| 1  | 19.615 | 950831  | 13173  | I  | 6.044   |      |        |      | 6.044   |
| 2  | 26.520 | 862797  | 14928  | II | 93.956  |      |        |      | 93.956  |
| 总计 |        | 9113628 | 162499 |    | 100.000 |      |        |      | 100.000 |

Annotation: Peak number ( **峰号** ), Retention Time (min) ( **保留时间** ), Area (mV\*min) ( **面积** ), Height (mV) ( **高度** ), Labeled peak ( **标记** ), Concentration ( **浓度** ) and Relative Area (%) ( **面积%** ).

**(R)-2 benzyl -(4-chlorophenyl)-4-oxo-3,4-dihydroquinoline-1(2H)-carboxylate (9)**

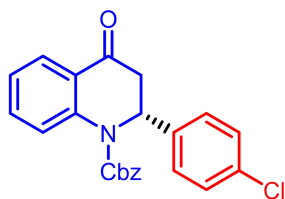

Colorless oil (78% isolated yield, 30.4 mg, 0.1 mmol), column chromatography purification using petroleum ether/EtOAc (10:1, v/v) as eluents.

<sup>1</sup>H NMR (400 MHz, CDCl<sub>3</sub>) δ 7.89 (dd, *J*<sub>1</sub> = 7.8 Hz, *J*<sub>2</sub> = 1.7 Hz, 1H), 7.77 (d, *J* = 8.5 Hz, 1H), 7.48-7.44 (m, 1H), 7.41-7.36 (m, 5H), 7.18-7.07 (m, 5H), 6.23-6.17 (m, 1H), 5.39 (d, *J* = 12.2 Hz, 1H), 5.32 (d, *J* = 12.2 Hz, 1H), 3.29-3.27 (m, 2H).

<sup>13</sup>C NMR (101 MHz, CDCl<sub>3</sub>) δ 192.5, 154.4, 141.4, 136.8, 135.6, 134.9, 133.7, 129.0, 128.9, 128.7, 128.4, 128.2, 127.1, 125.1, 124.6, 68.8, 55.9, 42.4.

[α]<sub>D</sub><sup>19</sup> = + 95.3° (c 0.1, CHCl<sub>3</sub>).

HRMS (ESI) [M+H]<sup>+</sup> calcd for C<sub>23</sub>H<sub>19</sub>ClNO<sub>3</sub>: 392.1048, found: 392.1044 .

HPLC Conditions: IPA/ Hexanes (10:90), 1.0 mL/min, Daicel Chiralpak OD-H column, λ = 220 nm, t<sub>R</sub> (min): minor = 14.3 min, major = 21.3 min; ee = 94%.



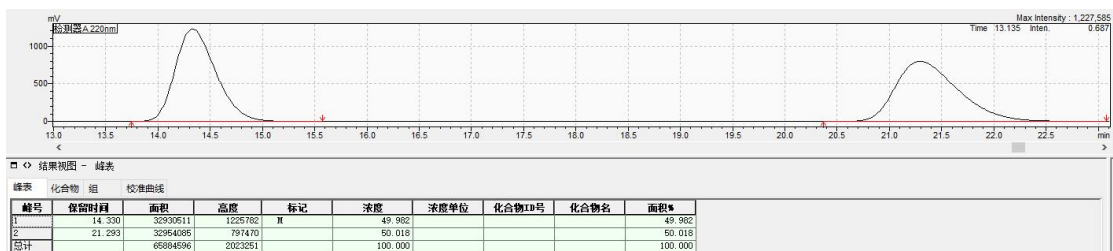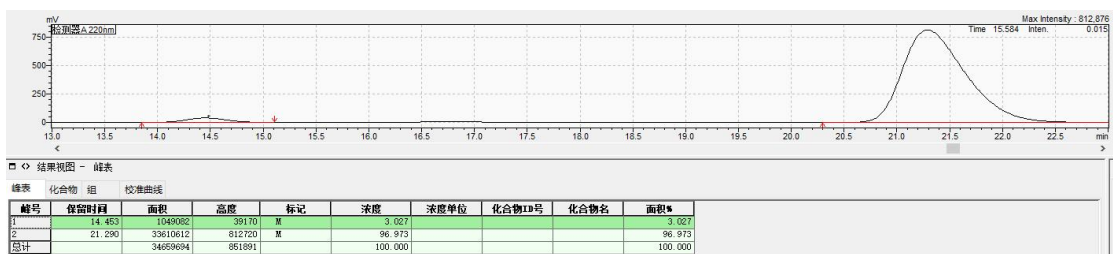

Annotation: Peak number (  ), Retention Time (min) (  ), Area (mV\*min) (  ), Height (mV) (  ), Labeled peak (  ), Concentration (  ) and Relative Area (%) (  ).

**(R)-2 benzyl -(4-fluorophenyl)-4-oxo-3,4-dihydroquinoline-1(2H)-carboxylate (10)**

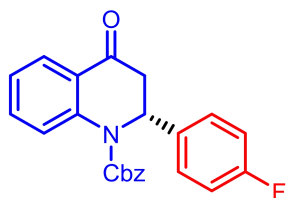

Colorless oil (96% isolated yield, 36.0 mg, 0.1 mmol), column chromatography purification using petroleum ether/EtOAc (10:1, v/v) as eluents.

$^1\text{H}$  NMR (400 MHz,  $\text{CDCl}_3$ )  $\delta$  7.90 (dd,  $J_1 = 7.8$  Hz,  $J_2 = 1.7$  Hz, 1H), 7.76 (d,  $J = 8.4$  Hz, 1H), 7.48-7.44 (m, 1H), 7.41-7.35 (m, 5H), 7.19-7.08 (m, 3H), 6.92-6.86 (m, 2H), 6.22-6.20 (m, 1H), 5.40 (d,  $J = 12.2$  Hz, 1H), 5.33 (d,  $J = 12.2$  Hz, 1H), 3.34-3.23 (m, 2H).

$^{13}\text{C}$  NMR (101 MHz,  $\text{CDCl}_3$ )  $\delta$  192.7, 162.2 (d,  $J = 247.0$  Hz), 154.4, 141.4, 135.6, 134.8, 134.0 (d,  $J = 3.3$  Hz), 128.9, 128.7, 128.5 (d,  $J = 8.2$  Hz), 128.4, 127.1, 125.1, 124.6, 124.5, 115.7 (d,  $J = 21.6$  Hz), 68.8, 55.8, 42.6.

HRMS (ESI)  $[\text{M}+\text{H}]^+$  calcd for  $\text{C}_{23}\text{H}_{19}\text{FNO}_3$ : 376.1344, found: 376.1339.

$[\alpha]_D^{22} = +66.9^\circ$  (c 0.1, MeOH).

HPLC Conditions: IPA/ Hexanes (10:90), 1.0 mL/min, Daicel Chiralpak OD-H column,  $\lambda = 220$  nm,  $t_R$  (min): minor = 14.0 min, major = 18.8 min; ee = 94%.

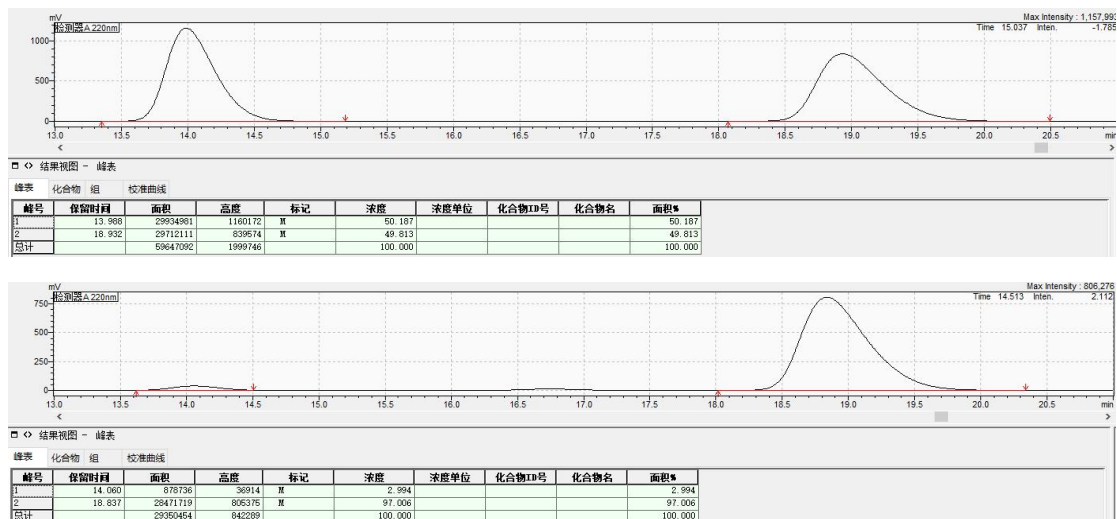

Annotation: Peak number (峰号), Retention Time (min) (保留时间), Area (mV\*min) (面积), Height (mV) (高度), Labeled peak (标记), Concentration (浓度) and Relative Area (%) (面积%).

(R)-4

benzyl-oxo-2-(3-(trifluoromethyl)phenyl)-3,4-dihydroquinoline-1(2H)-carboxylate (11)

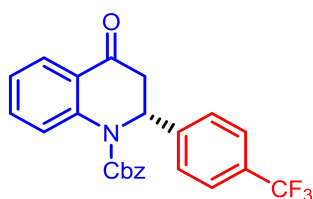

Yellow oil (59% isolated yield, 25.1 mg and 8.1 mg substrate, 0.1 mmol), column chromatography purification using petroleum ether/EtOAc (10:1, v/v) as eluents.

$^1\text{H}$  NMR (400 MHz,  $\text{CDCl}_3$ )  $\delta$  7.90 (dd,  $J_1 = 7.9$  Hz,  $J_2 = 1.7$  Hz, 1H), 7.81 (d,  $J = 8.5$  Hz, 1H), 7.52-7.45(m, 3H), 7.40-7.36 (m, 5H), 7.34-7.29 (m, 2H), 7.13-7.08 (m, 1H), 6.27 (t,  $J = 4.4$  Hz, 1H), 5.40 (d,  $J = 12.2$  Hz, 1H), 5.33 (d,  $J = 12.2$  Hz, 1H), 3.34-3.31 (m, 2H).

$^{13}\text{C}$  NMR (126 MHz,  $\text{CDCl}_3$ )  $\delta$  192.2, 154.4, 142.4, 141.4, 135.5, 135.0, 130.2 (d,  $J = 32.6$  Hz), 128.9, 128.4, 128.0 (d,  $J = 197.5$  Hz), 127.2, 127.1, 125.8 (q,  $J = 3.7$  Hz), 125.0, 124.7, 124.5, 122.9, 68.9, 56.1, 42.4.

HRMS (ESI)  $[\text{M}+\text{H}]^+$  calcd for  $\text{C}_{24}\text{H}_{19}\text{F}_3\text{NO}_3$ : 426.1312, found: 426.1321.

$[\alpha]_{\text{D}}^{25} = +119.4^\circ$  ( $c$  0.1, MeOH).

HPLC Conditions: IPA/ Hexanes (10:90), 1.0 mL/min, Daicel Chiralpak OD-H column,  $\lambda = 220$  nm,  $t_{\text{R}}$  (min): minor = 13.2 min, major = 21.3 min; ee = 96%.

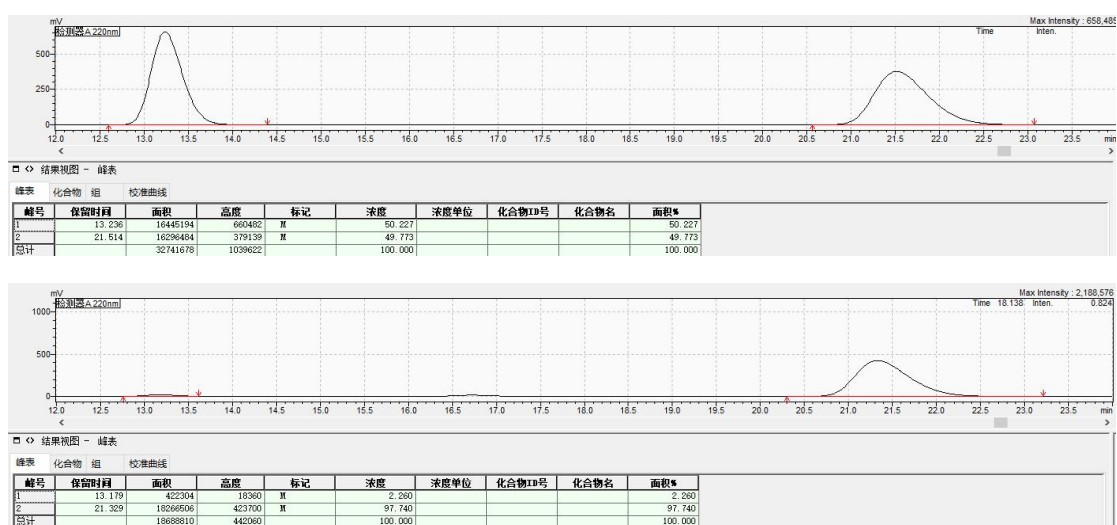

Annotation: Peak number (峰号), Retention Time (min) (保留时间), Area (mV\*min) (面积), Height (mV) (高度), Labeled peak (标记), Concentration (浓度) and Relative Area (%). (面积%).

**(R)-benzyl**

**2-(4-(methoxycarbonyl)phenyl)-4-oxo-3,4-dihydroquinoline-1(2H)-carboxylate (12)**

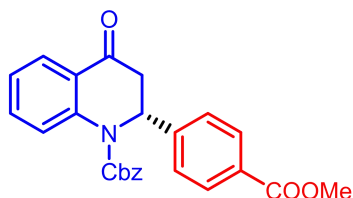

White solid (78% isolated yield, 32.4 mg, 0.1 mmol), mp: 163.0-165.2 °C, column chromatography purification using petroleum ether/EtOAc (10:1, v/v) as eluents.

<sup>1</sup>H NMR (400 MHz, CDCl<sub>3</sub>) δ 7.87 (dd, *J*<sub>1</sub> = 8.5 Hz, *J*<sub>2</sub> = 2.0 Hz, 3H), 7.79 (d, *J* = 8.4 Hz, 1H), 7.48-7.43 (m, 1H), 7.41-7.32 (m, 5H), 7.27 (dd, *J*<sub>1</sub> = 7.2 Hz, *J*<sub>2</sub> = 1.7 Hz, 2H), 7.11-7.06 (m, 1H), 6.27 (t, *J* = 4.0 Hz, 1H), 5.40 (d, *J* = 12.2 Hz, 1H), 5.33 (d, *J* = 12.2 Hz, 1H), 3.84 (s, 3H), 3.33 (d, *J* = 4.0 Hz, 2H).

<sup>13</sup>C NMR (101 MHz, CDCl<sub>3</sub>) δ 192.3, 166.6, 154.3, 143.3, 141.4, 135.5, 134.8, 130.0, 129.6, 128.9, 128.71, 128.66, 128.3, 127.1, 126.8, 125.0, 124.6, 124.5, 68.8, 56.2, 52.2, 42.3.

HRMS (ESI) [M+H]<sup>+</sup> calcd for C<sub>25</sub>H<sub>22</sub>NO<sub>5</sub>: 416.1493, found: 416.1489.

[α]<sub>D</sub><sup>26</sup> = + 48.3° (c 0.1, MeOH).

HPLC Conditions: IPA/ Hexanes (10:90), 1.0 mL/min, Daicel Chiralpak OD-H column, λ = 220 nm, t<sub>R</sub> (min): minor = 23.8 min, major = 39.7 min; ee = 96%.

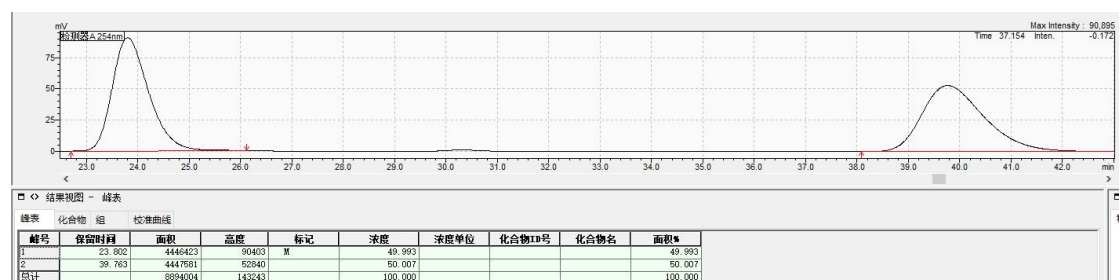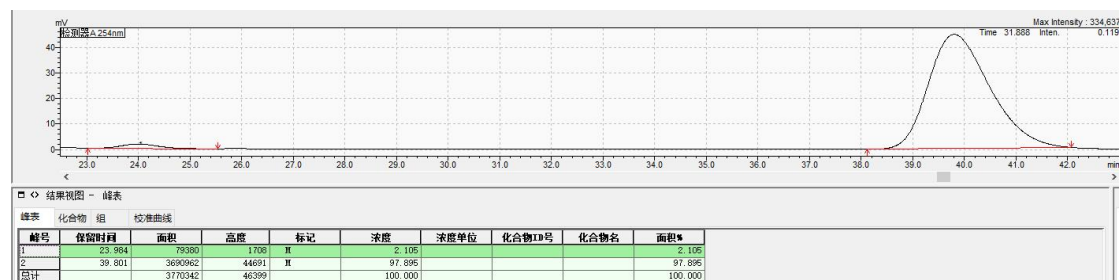

Annotation: Peak number (  ), Retention Time (min) (  ), Area (mV\*min) (  ), Height (mV) (  ), Labeled peak (  ), Concentration (  ) and Relative Area (%) (  ).

**(R)- benzyl 4-oxo-2-(*m*-tolyl)-3,4-dihydroquinoline-1(2*H*)-carboxylate (13)**

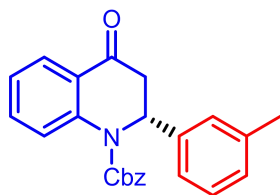

Colorless oil (68% isolated yield, 25.2 mg, 0.1 mmol), column chromatography purification using petroleum ether/EtOAc (10:1, v/v) as eluents.

$^1\text{H}$  NMR (400 MHz,  $\text{CDCl}_3$ )  $\delta$  7.95 (dd,  $J_1 = 7.8$  Hz,  $J_2 = 1.7$  Hz, 1H), 7.73-7.72 (m, 1H), 7.47-7.46 (m, 1H), 7.36-7.29 (m, 5H), 7.17-7.08(m, 3H), 6.93-6.89 (m, 2H), 6.26 (dd,  $J_1 = 6.4$  Hz,  $J_2 = 1.9$  Hz, 1H), 5.34 (d,  $J = 12.3$  Hz, 1H), 5.22 (d,  $J = 12.3$  Hz, 1H), 3.31 (dd,  $J_1 = 17.5$  Hz,  $J_2 = 6.5$  Hz, 1H), 3.11 (dd,  $J_1 = 17.5$  Hz,  $J_2 = 1.9$  Hz, 1H), 2.34 (s, 3H)

$^{13}\text{C}$  NMR (101 MHz,  $\text{CDCl}_3$ )  $\delta$  194.3, 154.9, 142.8, 137.5, 137.2, 136.5, 135.4, 132.1, 129.5, 129.3, 128.9, 128.7, 127.6, 127.0, 126.8, 126.6, 125.5, 125.4, 69.3, 55.5, 43.5, 20.5.

HRMS (ESI)  $[\text{M}+\text{H}]^+$  calcd for  $\text{C}_{24}\text{H}_{22}\text{NO}_3$ : 372.1594, found: 372.1590.

$[\alpha]_{\text{D}}^{23} = +53.6^\circ$  ( $c$  0.1,  $\text{CHCl}_3$ ).

HPLC Conditions: IPA/ Hexanes (10:90), 1.0 mL/min, Daicel Chiralpak OD-H column,  $\lambda = 220$  nm,  $t_{\text{R}}$  (min): minor = 9.3 min, major = 10.9 min; ee = 95%.

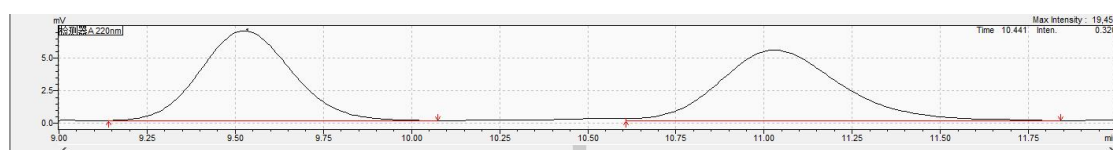

| 峰号 | 保留时间   | 面积     | 高度    | 标记 | 浓度      | 浓度单位 | 化合物ID号 | 化合物名 | 面积%     |
|----|--------|--------|-------|----|---------|------|--------|------|---------|
| 1  | 9.525  | 128999 | 6899  | V  | 49.161  |      |        |      | 49.161  |
| 2  | 11.030 | 128956 | 6427  |    | 50.839  |      |        |      | 50.839  |
| 总计 |        | 253655 | 12327 |    | 100.000 |      |        |      | 100.000 |

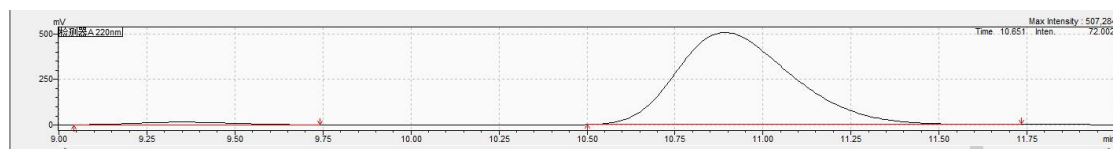

| 峰号 | 保留时间   | 面积       | 高度     | 标记 | 浓度      | 浓度单位 | 化合物ID号 | 化合物名 | 面积%     |
|----|--------|----------|--------|----|---------|------|--------|------|---------|
| 1  | 9.352  | 283433   | 14674  | M  | 2.416   |      |        |      | 2.416   |
| 2  | 10.891 | 11447899 | 504258 | M  | 97.584  |      |        |      | 97.584  |
| 总计 |        | 11731332 | 518931 |    | 100.000 |      |        |      | 100.000 |

Annotation: Peak number (峰号), Retention Time (min) (保留时间), Area (mV\*min) (面积), Height (mV) (高度), Labeled peak (标记), Concentration (浓度) and Relative Area (%). (面积%).

**(R)-2 benzyl -(3-fluorophenyl)-4-oxo-3,4-dihydroquinoline-1(2H)-carboxylate (14)**

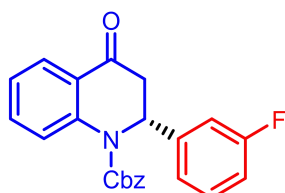

Colorless oil (43% isolated yield, 16.1 mg 0.1 mmol), column chromatography purification using petroleum ether/EtOAc (10:1, v/v) as eluents.

$^1\text{H}$  NMR (400 MHz,  $\text{CDCl}_3$ )  $\delta$  7.90 (dd,  $J_1 = 7.9$  Hz,  $J_2 = 1.7$  Hz, 1H), 7.80 (d,  $J = 8.4$  Hz, 1H), 7.50-7.45 (m, 2H), 7.41-7.34 (m, 5H), 7.21-7.08 (m, 3H), 6.97-6.86 (m, 2H), 6.21 (t,  $J = 3.9$  Hz, 1H), 5.40 (d,  $J = 12.2$  Hz, 1H), 5.33 (d,  $J = 12.2$  Hz, 1H), 3.30-3.28 (m, 2H).

$^{13}\text{C}$  NMR (101 MHz,  $\text{CDCl}_3$ )  $\delta$  192.4, 163.1 (d,  $J = 246.9$  Hz), 154.4, 141.4, 140.9 (d,  $J = 6.6$  Hz), 135.6, 134.9, 130.4 (d,  $J = 8.2$  Hz), 128.9, 128.7, 128.4, 127.1, 125.0, 124.6, 122.31, 122.28, 114.8 (d,  $J = 21.1$  Hz), 114.1 (d,  $J = 22.6$  Hz), 68.9, 56.0, 42.4.

HRMS (ESI)  $[\text{M}+\text{H}]^+$  calcd for  $\text{C}_{23}\text{H}_{19}\text{FNO}_3$ : 376.1344, found: 376.1350.

$[\alpha]_{\text{D}}^{26} = +65.2^\circ$  ( $c$  0.1,  $\text{CHCl}_3$ ).

HPLC Conditions: IPA/ Hexanes (10:90), 1.0 mL/min, Daicel Chiralpak OD-H column,  $\lambda = 220$  nm,  $t_{\text{R}}$  (min): minor = 14.0 min, major = 17.8 min; ee = 94%.

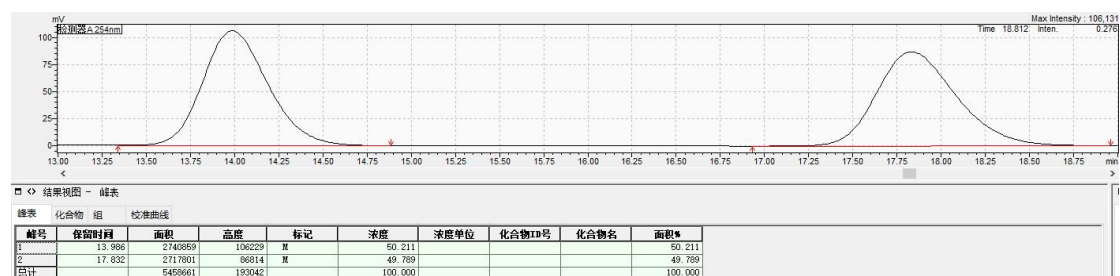

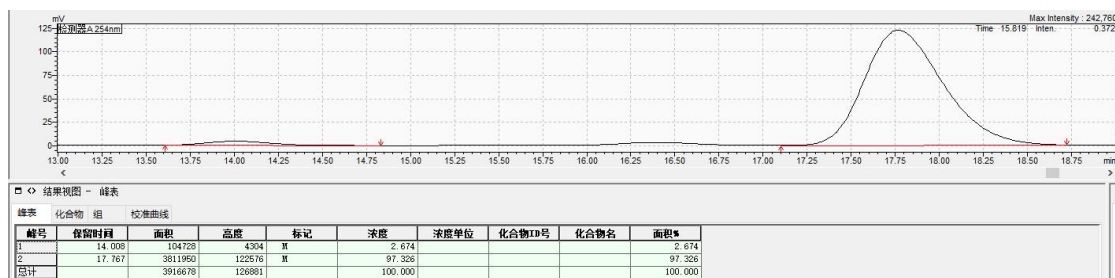

Annotation: Peak number (峰号), Retention Time (min) (保留时间), Area (mV\*min) (面积), Height (mV) (高度), Labeled peak (标记), Concentration (浓度) and Relative Area (%) (面积%).

**(R)- benzyl 4-oxo-2-(*o*-tolyl)-3,4-dihydroquinoline-1(2*H*)-carboxylate (15)**

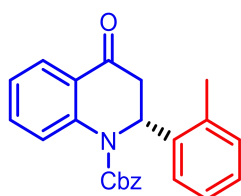

White solid (54% isolated yield, 20.0 mg, 0.1 mmol), mp: 105.4-117.9 °C, column chromatography purification using petroleum ether/EtOAc (10:1, v/v) as eluents.

<sup>1</sup>H NMR (400 MHz, CDCl<sub>3</sub>) δ 7.95 (dd, *J*<sub>1</sub> = 7.8 Hz, *J*<sub>2</sub> = 1.7 Hz, 1H), 7.73-7.72 (m, 1H), 7.47-7.46 (m, 1H), 7.36-7.29 (m, 5H), 7.17-7.08 (m, 3H), 6.93-6.89 (m, 2H), 6.26 (dd, *J*<sub>1</sub> = 6.4 Hz, *J*<sub>2</sub> = 1.9 Hz, 1H), 5.34 (d, *J* = 12.3 Hz, 1H), 5.22 (d, *J* = 12.3 Hz, 1H), 3.31 (dd, *J*<sub>1</sub> = 17.5 Hz, *J*<sub>2</sub> = 6.5 Hz, 1H), 3.11 (dd, *J*<sub>1</sub> = 17.5 Hz, *J*<sub>2</sub> = 1.9 Hz, 1H), 2.34 (s, 3H).

<sup>13</sup>C NMR (101 MHz, CDCl<sub>3</sub>) δ 193.5, 154.1, 142.0, 136.8, 136.4, 135.7, 134.7, 131.4, 128.8, 128.5, 128.2, 128.0, 126.9, 126.3, 126.1, 125.8, 124.8, 124.7, 68.6, 54.8, 42.8, 19.7.

HRMS (ESI) [M+H]<sup>+</sup> calcd for C<sub>24</sub>H<sub>22</sub>NO<sub>3</sub>: 372.1594, found: 372.1589

[α]<sub>D</sub><sup>24</sup> = +42.8° (*c* 0.1, CHCl<sub>3</sub>).

HPLC Conditions: IPA/ Hexanes (10:90), 1.0 mL/min, Daicel Chiralpak IC column, λ = 220 nm, t<sub>R</sub> (min): minor = 15.4 min, major = 16.1 min; ee = 67%.

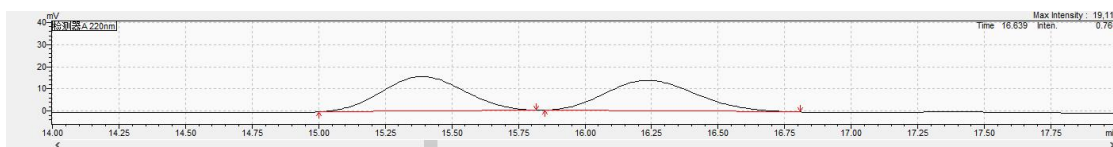

| 峰号 | 保留时间   | 面积     | 高度    | 标记 | 浓度      | 浓度单位 | 化合物ID号 | 化合物名 | 面积%     |
|----|--------|--------|-------|----|---------|------|--------|------|---------|
| 1  | 15.389 | 336201 | 18676 | M  | 50.708  |      |        |      | 50.708  |
| 2  | 16.235 | 320315 | 13769 | M  | 49.292  |      |        |      | 49.292  |
| 总计 |        | 663016 | 29364 |    | 100.000 |      |        |      | 100.000 |

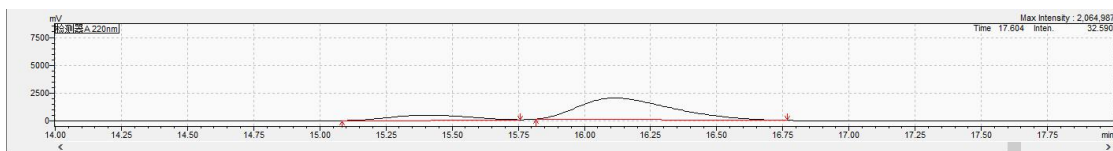

| 峰号 | 保留时间   | 面积       | 高度      | 标记 | 浓度      | 浓度单位 | 化合物ID号 | 化合物名 | 面积%     |
|----|--------|----------|---------|----|---------|------|--------|------|---------|
| 1  | 15.410 | 5386754  | 464022  | M  | 16.596  |      |        |      | 16.596  |
| 2  | 16.114 | 4717217  | 192661  | M  | 83.405  |      |        |      | 83.405  |
| 总计 |        | 56663971 | 2390683 |    | 100.000 |      |        |      | 100.000 |

Annotation: Peak number (峰号), Retention Time (min) (保留时间), Area (mV\*min) (面积), Height (mV) (高度), Labeled peak (标记), Concentration (浓度) and Relative Area (%). (面积%).

(R)-benzyl

2-(4-methoxy-3-methylphenyl)-4-oxo-3,4-dihydroquinoline-1(2H)-carboxylate

(16)

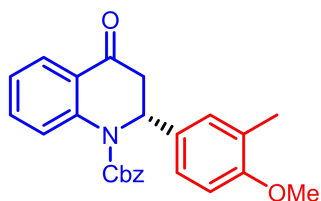

White solid (83% isolated yield, 33.3 mg, 0.1 mmol), mp: 184.3-186.7 °C, column chromatography purification using petroleum ether/EtOAc (3:1, v/v) as eluents.

<sup>1</sup>H NMR (500 MHz, CDCl<sub>3</sub>) δ 7.90 (dd,  $J_1 = 7.9$  Hz,  $J_2 = 1.7$  Hz, 1H), 7.78 (d,  $J = 8.4$  Hz, 1H), 7.46-7.35 (m, 6H), 7.07 (dd,  $J_1 = 7.4$  Hz,  $J_2 = 1.1$  Hz, 1H), 6.96-6.92 (m, 2H), 6.61 (d,  $J = 8.4$  Hz, 1H), 6.16 (t,  $J = 4.0$  Hz, 1H), 5.39 (d,  $J = 12.3$  Hz, 1H), 5.34 (d,  $J = 12.2$  Hz, 1H), 3.71 (s, 3H), 3.26-3.25 (m, 2H), 2.08 (s, 3H).

<sup>13</sup>C NMR (126 MHz, CDCl<sub>3</sub>) δ 193.2, 157.2, 154.4, 141.6, 135.8, 134.6, 129.6, 129.2, 128.8, 128.6, 128.3, 127.0, 126.9, 125.2, 125.0, 124.5, 124.2, 109.7, 68.5, 55.8, 55.3, 42.5, 16.4.

HRMS (ESI) [M+H]<sup>+</sup> calcd for C<sub>25</sub>H<sub>24</sub>NO<sub>4</sub>: 402.1700, found: 402.1689.



$[\alpha]_D^{26} = + 74.9^\circ$  ( $c$  0.1,  $\text{CHCl}_3$ ).

HPLC Conditions: IPA/ Hexanes (10:90), 1.0 mL/min, Daicel Chiralpak OD-H column,  $\lambda = 220$  nm,  $t_R$  (min): minor = 14.2 min, major = 17.0 min; ee = 86%.

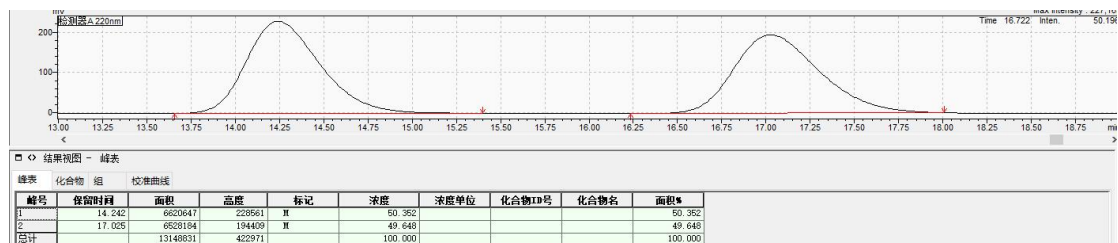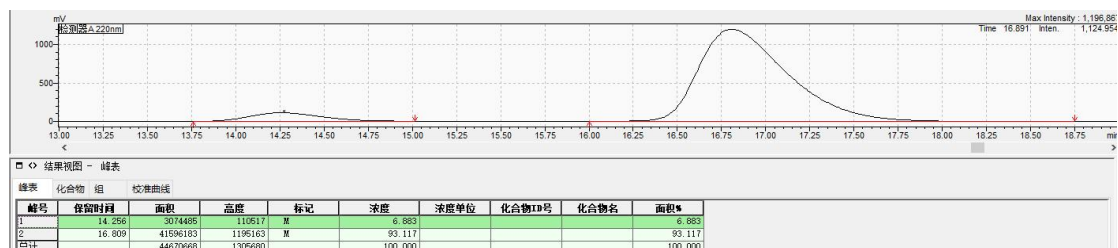

Annotation: Peak number (峰号), Retention Time (min) (保留时间), Area (mV\*min) (面积), Height (mV) (高度), Labeled peak (标记), Concentration (浓度) and Relative Area (%). (面积%).

### (R)-benzyl

### 2-(3,5-dimethoxyphenyl)-4-oxo-3,4-dihydroquinoline-1(2H)-carboxylate (17)

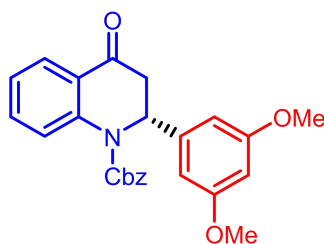

White solid (82% isolated yield, 34.2 mg, 0.1 mmol), mp: 157.1-159.0 °C, column chromatography purification using petroleum ether/EtOAc (3:1, v/v) as eluents.

$^1\text{H}$  NMR (500 MHz,  $\text{CDCl}_3$ )  $\delta$  7.90 (dd,  $J_1 = 7.8$  Hz,  $J_2 = 1.7$  Hz, 1H), 7.81 (d,  $J = 8.2$  Hz, 1H), 7.49-7.45 (m, 1H), 7.42-7.35 (m, 5H), 7.11-7.08 (m, 1H), 6.30 (dd,  $J_1 = 2.2$  Hz,  $J_2 = 0.9$  Hz, 2H), 6.24 (t,  $J = 2.3$  Hz, 1H), 6.15 (t,  $J = 4.0$  Hz, 1H), 5.38 (d,  $J = 12.3$  Hz, 1H), 5.32 (d,  $J = 12.3$  Hz, 1H), 3.64 (s, 6H), 3.27-3.26 (m, 2H).

$^{13}\text{C}$  NMR (126 MHz,  $\text{CDCl}_3$ )  $\delta$  192.7, 161.0, 154.3, 141.7, 140.6, 135.7, 134.7, 128.8, 128.7, 128.6, 128.3, 127.1, 125.2, 124.45, 124.39, 105.2, 99.3, 68.6, 56.3, 55.3, 42.6.

HRMS (ESI)  $[\text{M}+\text{H}]^+$  calcd for  $\text{C}_{25}\text{H}_{24}\text{NO}_5$ : 418.1649, found: 418.1640.

$[\alpha]_{\text{D}}^{26} = +48.3^\circ$  ( $c$  0.1,  $\text{CHCl}_3$ ).

HPLC Conditions: IPA/ Hexanes (10:90), 1.0 mL/min, Daicel Chiralpak OD-H column,  $\lambda = 220$  nm,  $t_{\text{R}}$  (min): minor = 25.6 min, major = 37.8 min; ee = 97%.

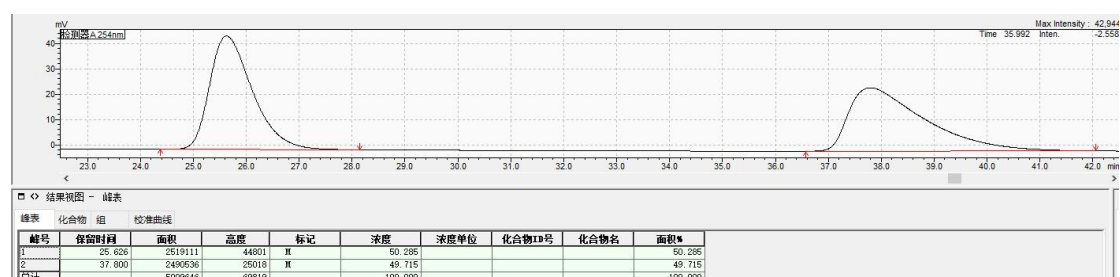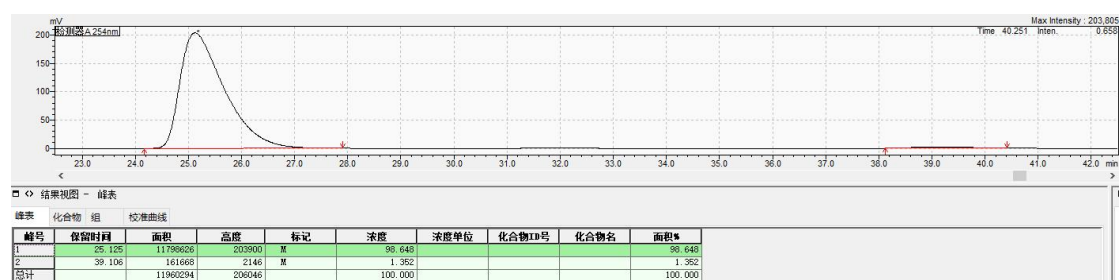

Annotation: Peak number (峰号), Retention Time (min) (保留时间), Area ( $\text{mV} \cdot \text{min}$ ) (面积), Height (mV) (高度), Labeled peak (标记), Concentration (浓度) and Relative Area (%) (面积%).

**(R)-benzyl 2-(3,4-difluorophenyl)-4-oxo-3,4-dihydroquinoline-1(2H)-carboxylate (18)**

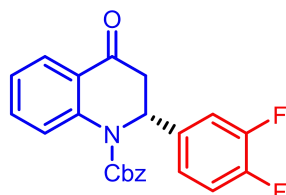

Colorless oil (76% isolated yield, 29.9 mg and 5.3 mg substrate, 0.1 mmol), column chromatography purification using petroleum ether/EtOAc (10:1, v/v) as eluents.

$^1\text{H}$  NMR (400 MHz,  $\text{CDCl}_3$ )  $\delta$  7.90 (dd,  $J_1 = 7.9$  Hz,  $J_2 = 1.7$  Hz, 1H), 7.76 (d,  $J = 8.4$  Hz, 1H), 7.50-7.45 (m, 1H), 7.41-7.34 (m, 5H), 7.13-7.09 (m, 1H), 7.04-6.95 (m, 2H), 6.92-6.87 (m, 1H), 6.18-6.16 (m, 1H), 5.40 (d,  $J = 12.2$  Hz, 1H), 5.33 (d,  $J = 12.2$  Hz, 1H), 3.33-3.20 (m, 2H).

$^{13}\text{C}$  NMR (101 MHz,  $\text{CDCl}_3$ )  $\delta$  192.0, 154.2, 151.3 (dd,  $J_1 = 71.2$  Hz,  $J_2 = 12.7$  Hz), 148.8 (dd,  $J_1 = 71.2$  Hz,  $J_2 = 12.6$  Hz), 141.0, 135.3 (q,  $J = 16.0$  Hz), 134.8, 128.8, 128.7, 128.3, 127.0, 124.8, 124.6, 124.4, 122.7 (dd,  $J_1 = 6.5$  Hz,  $J_2 = 3.6$  Hz), 117.5 (d,  $J = 17.4$  Hz), 116.1 (d,  $J = 18.2$  Hz), 68.8, 55.5, 55.4, 42.2.

HRMS (ESI)  $[\text{M}+\text{H}]^+$  calcd for  $\text{C}_{23}\text{H}_{18}\text{F}_2\text{NO}_3$ : 394.1249, found: 394.1241.

$[\alpha]_{\text{D}}^{29} = +73.0^\circ$  ( $c$  0.1,  $\text{CHCl}_3$ ).

HPLC Conditions: IPA/ Hexanes (10:90), 1.0 mL/min, Daicel Chiralpak OD-H column,  $\lambda = 220$  nm,  $t_{\text{R}}$  (min): minor = 14.6 min, major = 21.6 min; ee = 96%.

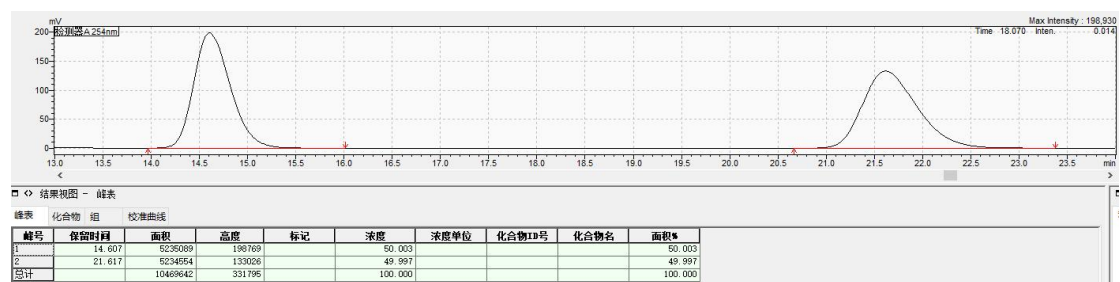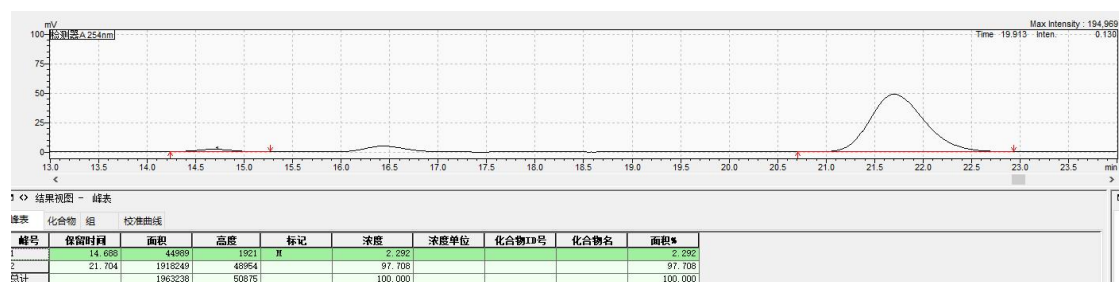

Annotation: Peak number (  ), Retention Time (min) (  ), Area (mV\*min) (  ), Height (mV) (  ), Labeled peak (  ), Concentration (  ) and Relative Area (%) (  ).

**(R)-benzyl 2-(2,4-dimethylphenyl)-4-oxo-3,4-dihydroquinoline-1(2H)-carboxylate (19)**

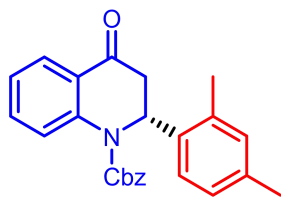

White solid (44% isolated yield, 16.9 mg and 10.0 mg substrate, 0.1 mmol), mp: 67.6-68.7 °C, column chromatography purification using petroleum ether/EtOAc (10:1, v/v) as eluents.

$^1\text{H}$  NMR (500 MHz,  $\text{CDCl}_3$ )  $\delta$  7.95 (dd,  $J_1 = 7.8$  Hz,  $J_2 = 1.7$  Hz, 1H), 7.73 (d,  $J = 8.4$  Hz, 1H), 7.48-7.44 (m, 1H), 7.38-7.29 (m, 5H), 7.16-7.13 (m, 1H), 6.98 (d,  $J = 7.7$  Hz, 1H), 6.88 (dd,  $J_1 = 7.6$  Hz,  $J_2 = 1.8$  Hz, 1H), 6.67 (d,  $J = 1.8$  Hz, 1H), 6.22 (dd,  $J_1 = 6.5$  Hz,  $J_2 = 1.9$  Hz, 1H), 5.34 (d,  $J = 12.3$  Hz, 1H), 5.22 (d,  $J = 12.3$  Hz, 1H), 3.29 (dd,  $J_1 = 17.5$  Hz,  $J_2 = 6.5$  Hz, 1H), 3.11 (dd,  $J_1 = 17.5$  Hz,  $J_2 = 1.9$  Hz, 1H), 2.29 (s, 3H), 2.08 (s, 3H).

$^{13}\text{C}$  NMR (126 MHz,  $\text{CDCl}_3$ )  $\delta$  193.6, 154.1, 142.1, 136.6, 135.7, 135.4, 134.6, 133.2, 131.3, 128.7, 128.6, 128.5, 128.2, 127.1, 126.7, 125.9, 124.8, 124.7, 68.5, 54.7, 42.8, 21.2, 19.3.

HRMS (ESI)  $[\text{M}+\text{H}]^+$  calcd for  $\text{C}_{25}\text{H}_{24}\text{NO}_3$ : 386.1751, found: 386.1760.

$[\alpha]_{\text{D}}^{31} = +54.9^\circ$  ( $c$  0.1,  $\text{CHCl}_3$ ).

HPLC Conditions: IPA/ Hexanes (10:90), 1.0 mL/min, Daicel Chiralpak OD-H column,  $\lambda = 220$  nm,  $t_{\text{R}}$  (min): minor = 28.1min, major = 29.4 min; ee = 67%.

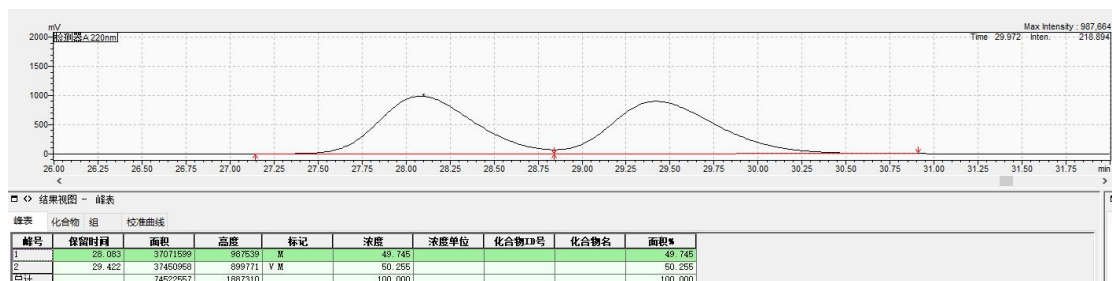

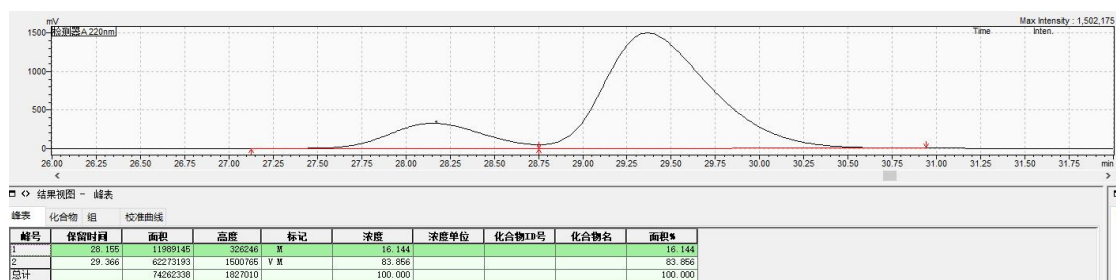

Annotation: Peak number (峰号), Retention Time (min) (保留时间), Area (mV\*min) (面积), Height (mV) (高度), Labeled peak (标记), Concentration (浓度) and Relative Area (%). (面积%).

**(R)-benzyl 2-(naphthalen-1-yl)-4-oxo-3,4-dihydroquinoline-1(2H)-carboxylate (20)**

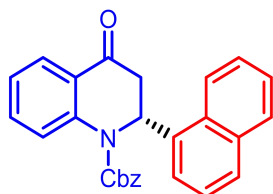

White solid (32% isolated yield, 13.0 mg and 12.6 mg substrate, 0.1 mmol), mp: 117.3-120.9 °C, column chromatography purification using petroleum ether/EtOAc (5:1, v/v) as eluents.

<sup>1</sup>H NMR (500 MHz, CDCl<sub>3</sub>) δ 8.23-8.21 (m, 1H), 7.97 (dd,  $J_1 = 7.8$  Hz,  $J_2 = 1.7$  Hz, 1H), 7.83-7.80 (m, 1H), 7.68 (d,  $J = 8.1$  Hz, 1H), 7.53-7.49 (m, 3H), 7.40-7.31 (m, 6H), 7.19-7.08 (m, 3H), 6.90-6.89 (m, 1H), 5.41 (d,  $J = 12.4$  Hz, 1H), 5.29 (d,  $J = 12.4$  Hz, 1H), 3.50-3.31 (m, 2H).

<sup>13</sup>C NMR (126 MHz, CDCl<sub>3</sub>) δ 193.6, 154.3, 141.7, 135.8, 134.5, 134.1, 134.0, 131.1, 129.2, 129.1, 128.8, 128.5, 128.1, 126.84, 126.81, 126.0, 125.5, 125.0, 124.9, 124.8, 123.4, 68.6, 54.3, 43.2.

HRMS (ESI) [M+H]<sup>+</sup> calcd for C<sub>27</sub>H<sub>21</sub>NO<sub>3</sub>: 407.1521, found: 407.1529.

$[\alpha]_D^{25} = +76.5^\circ$  (c 0.1, CHCl<sub>3</sub>).

HPLC Conditions: IPA/ Hexanes (10:90), 1.0 mL/min, Daicel Chiralpak OD-H column,  $\lambda = 220$  nm,  $t_R$  (min): minor = 16.5 min, major = 17.7 min; ee = 71%.

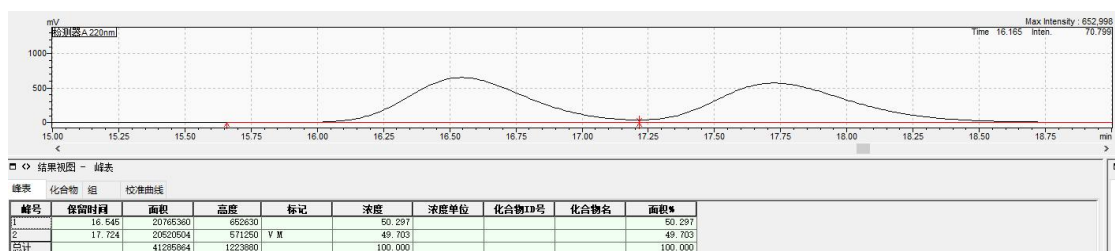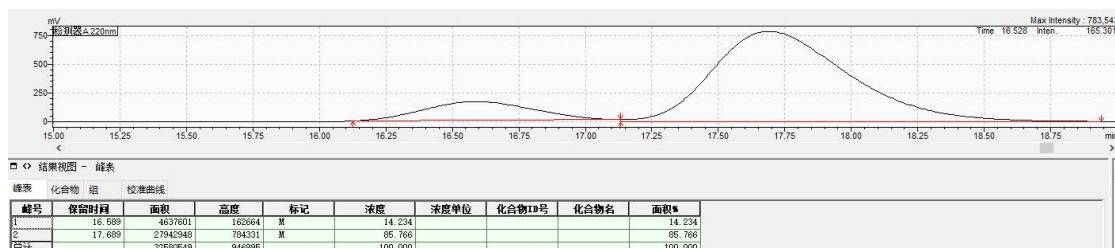

Annotation: Peak number ( **峰号** ), Retention Time (min) ( **保留时间** ), Area (mV\*min) ( **面积** ), Height (mV) ( **高度** ), Labeled peak ( **标记** ), Concentration ( **浓度** ) and Relative Area (%) ( **面积%** ).

**(R)-benzyl 2-(naphthalen-2-yl)-4-oxo-3,4-dihydroquinoline-1(2H)-carboxylate (21)**

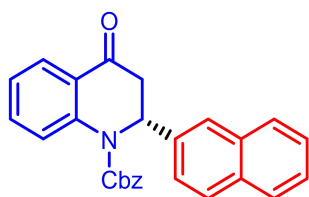

White solid (33% isolated yield, 13.4 mg and 14.8 mg substrate, 0.1 mmol), mp: 140.8-143.8 °C, column chromatography purification using petroleum ether/EtOAc (8:1, v/v) as eluents.

<sup>1</sup>H NMR (500 MHz, CDCl<sub>3</sub>) δ 7.89 (dd,  $J_1 = 7.9$  Hz,  $J_2 = 1.7$  Hz, 1H), 7.76 (d,  $J = 8.4$  Hz, 1H), 7.48 -7.45 (m, 1H), 7.40-7.36 (m, 6H), 7.26 (s, 2H), 7.18-7.16 (m, 2H), 7.13-7.09 (m, 3H), 6.20 (dd,  $J_1 = 5.3$  Hz,  $J_2 = 2.6$  Hz, 1H), 5.39 (d,  $J = 12.1$  Hz, 1H), 5.32 (d,  $J = 12.3$  Hz, 1H), 3.29-3.27 (m, 2H).

<sup>13</sup>C NMR (126 MHz, CDCl<sub>3</sub>) δ 193.0, 154.5, 141.4, 135.7, 135.6, 134.7, 133.0, 132.6, 129.9, 128.7, 128.3, 128.2, 127.6, 127.0, 126.5, 125.7, 125.2, 124.8, 124.6, 124.5, 123.3, 119.0, 68.7, 56.3, 42.3.

HRMS (ESI) [M+H]<sup>+</sup> calcd for C<sub>27</sub>H<sub>21</sub>NO<sub>3</sub>: 407.1521, found: 407.1528.

$[\alpha]_D^{25} = +91.0^\circ$  ( $c$  0.1,  $\text{CHCl}_3$ ).

HPLC Conditions: IPA/ Hexanes (10:90), 1.0 mL/min, Daicel Chiralpak OD-H column,  $\lambda = 220$  nm,  $t_R$  (min): minor = 17.5 min, major = 22.1 min; ee = 93%.

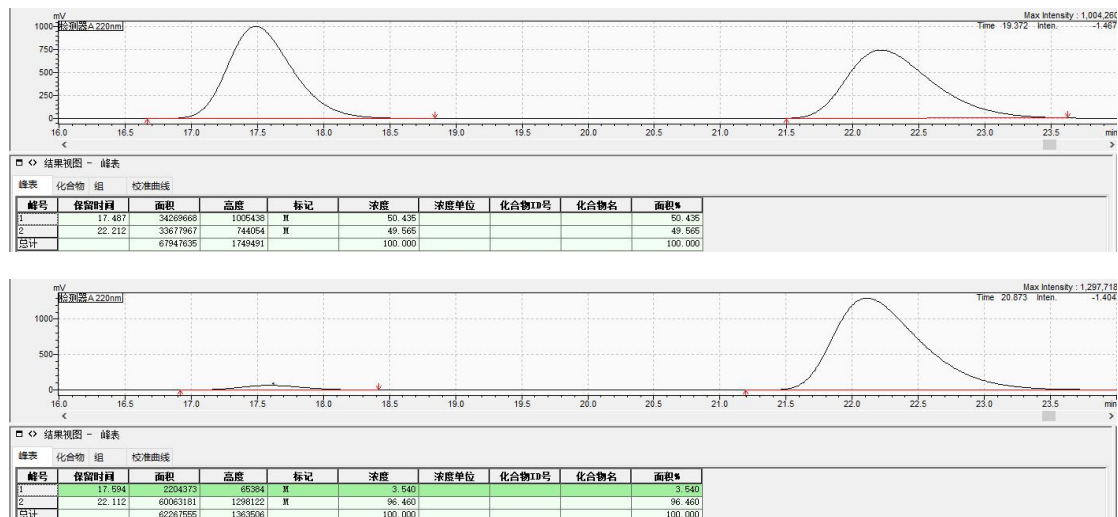

Annotation: Peak number (峰号), Retention Time (min) (保留时间), Area (mV\*min) (面积), Height (mV) (高度), Labeled peak (标记), Concentration (浓度) and Relative Area (%) (面积%).

**(R)-benzyl-4-oxo-2-(thiophen-3-yl)-3,4-dihydroquinoline-1(2H)-carboxylate (22)**

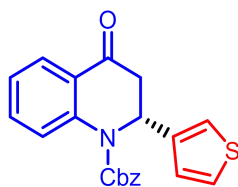

White solid (36% isolated yield, 13.0 mg and 14.0 mg substrate, 0.1 mmol), mp: 91.1-91.5 °C, column chromatography purification using petroleum ether/EtOAc (10:1, v/v) as eluents.

$^1\text{H}$  NMR (400 MHz,  $\text{CDCl}_3$ )  $\delta$  7.92 (dd,  $J_1 = 7.9$  Hz,  $J_2 = 1.7$  Hz, 1H), 7.78 (d,  $J = 8.4$  Hz, 1H), 7.48-7.37 (m, 6H), 7.17 (dd,  $J = 5.0$  Hz, 2.9 Hz, 1H), 7.12-7.08 (m, 1H), 6.95-6.93 (m, 1H), 6.89 (dd,  $J_1 = 5.1$  Hz,  $J_2 = 1.4$  Hz, 1H), 6.22-6.19 (m, 1H), 5.39 (d,  $J = 12.3$  Hz, 1H), 5.33 (d,  $J = 12.3$  Hz, 1H), 3.26-3.20 (m, 2H).

$^{13}\text{C}$  NMR (126 MHz,  $\text{CDCl}_3$ )  $\delta$  192.9, 154.1, 141.4, 139.8, 135.7, 134.7, 128.9, 128.7, 128.4, 127.1, 126.71, 126.66, 124.9, 124.4, 124.3, 122.7, 68.7, 53.8, 43.2.

HRMS (ESI)  $[\text{M}+\text{H}]^+$  calcd for  $\text{C}_{21}\text{H}_{18}\text{NO}_3\text{S}$ : 364.1002, found: 364.0920.

$[\alpha]_{\text{D}}^{26} = +50.5^\circ$  ( $c$  0.1,  $\text{CHCl}_3$ ).

HPLC Conditions: IPA/ Hexanes (10:90), 1.0 mL/min, Daicel Chiralpak OD-H column,  $\lambda = 220$  nm,  $t_{\text{R}}$  (min): minor = 16.4 min, major = 19.3 min; ee = 90%.

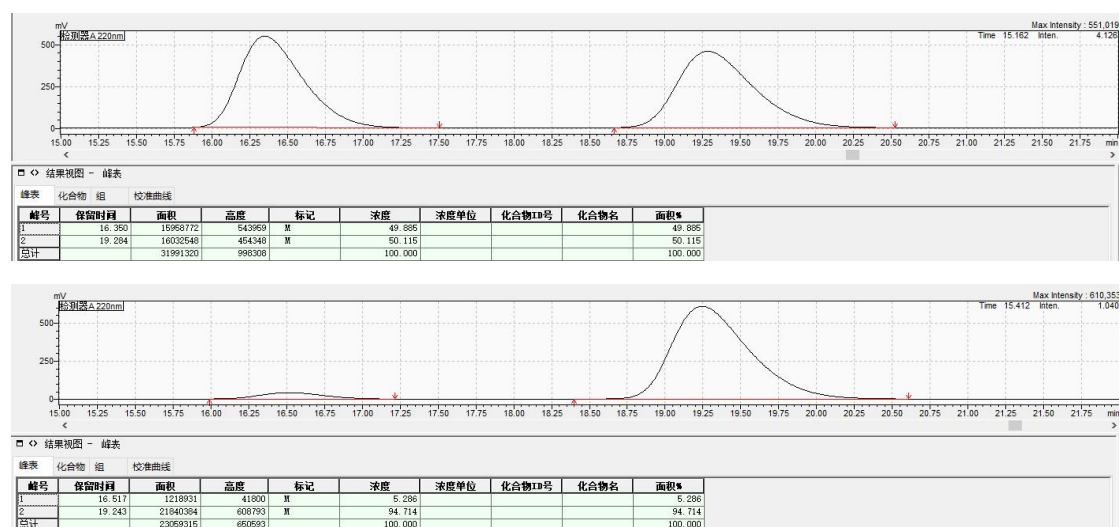

Annotation: Peak number (峰号), Retention Time (min) (保留时间), Area ( $\text{mV} \cdot \text{min}$ ) (面积), Height (mV) (高度), Labeled peak (标记), Concentration (浓度) and Relative Area (%) (面积%).

**(R)-tert-butyl 4-oxo-2-phenyl-3,4-dihydroquinoline-1(2H)-carboxylate (24)**

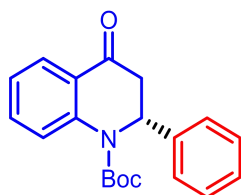

Yellow solid (22% isolated yield, 7.1 mg and 20.0 mg substrate, 0.1 mmol), mp: 122.6-125.2  $^\circ\text{C}$ , column chromatography purification using petroleum ether/EtOAc (10:1, v/v) as eluents.



$^1\text{H}$  NMR (500 MHz,  $\text{CHCl}_3$ )  $\delta$  7.88 (dd,  $J_1 = 7.8$  Hz,  $J_2 = 1.7$  Hz, 1H), 7.77-7.75 (m, 1H), 7.46-7.42 (m, 1H), 7.23-7.14 (m, 5H), 7.06-7.03 (m, 1H), 6.16 (t,  $J = 4.0$  Hz, 1H), 3.30-3.29 (m, 2H), 1.59 (s, 9H).

$^{13}\text{C}$  NMR (126 MHz,  $\text{CHCl}_3$ )  $\delta$  193.3, 153.5, 142.2, 138.7, 134.4, 128.7, 127.6, 126.9, 126.7, 125.1, 124.7, 123.8, 82.7, 55.9, 42.5, 28.5.

HRMS (ESI)  $[\text{M}+\text{H}]^+$  calcd for  $\text{C}_{20}\text{H}_{22}\text{NO}_3$ : 324.1592, found: 324.1588.

$[\alpha]_{\text{D}}^{24} = +79.4^\circ$  ( $c$  0.1,  $\text{CHCl}_3$ ).

HPLC Conditions: 20% IPA/ Hexanes, 1.0 mL/min, Daicel Chiralpak IC column,  $\lambda = 220$  nm,  $t_{\text{R}}$  (min): minor = 6.0 min, major = 6.5 min; ee = 90%.

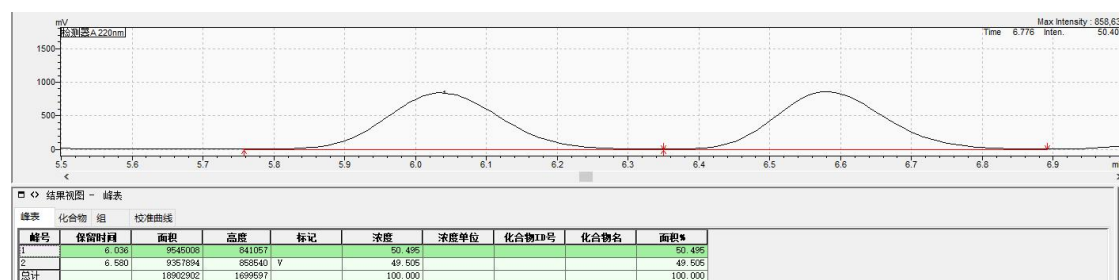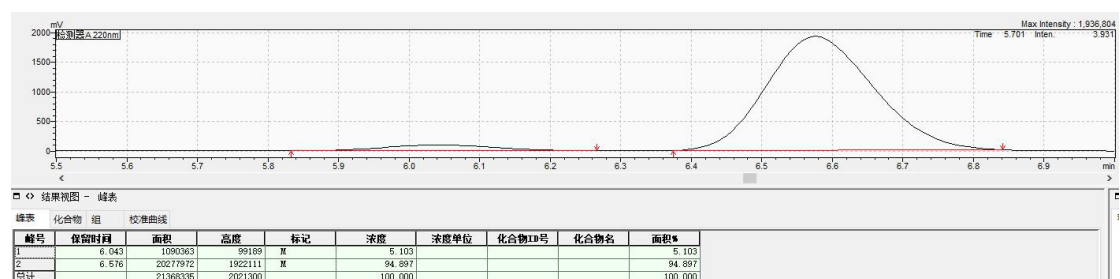

Annotation: Peak number (峰号), Retention Time (min) (保留时间), Area ( $\text{mV} \cdot \text{min}$ ) (面积), Height (mV) (高度), Labeled peak (标记), Concentration (浓度) and Relative Area (%) (面积%).

**(R)-benzyl-6-methoxy-4-oxo-2-phenyl-3,4-dihydroquinoline-1(2H)-carboxylate (25)**

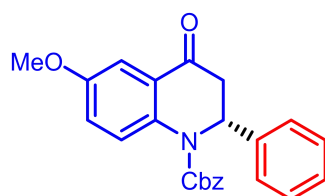

Colorless oil (93% isolated yield, 36.0 mg, 0.1 mmol), column chromatography purification using petroleum ether/EtOAc (10:1, v/v) as eluents.

$^1\text{H}$  NMR (500 MHz,  $\text{CDCl}_3$ )  $\delta$  7.90 (dd,  $J_1 = 7.9$  Hz,  $J_2 = 1.7$  Hz, 1H), 7.77 (d,  $J = 8.5$  Hz, 1H), 7.46-7.35 (m, 6H), 7.11-7.06 (m, 3H), 6.73-6.71 (m, 2H), 6.19 (t,  $J = 4.0$  Hz, 1H), 5.40 (d,  $J = 12.2$  Hz, 1H), 5.32 (d,  $J = 12.3$  Hz, 1H), 3.70 (s, 3H), 3.27 (d,  $J = 4.0$  Hz, 2H).

$^{13}\text{C}$  NMR (126 MHz,  $\text{CDCl}_3$ )  $\delta$  193.1, 159.0, 154.4, 141.5, 135.8, 134.7, 130.2, 128.9, 128.6, 128.3, 127.9, 126.9, 125.2, 124.6, 124.3, 114.1, 68.6, 55.8, 55.3, 42.5.

HRMS (ESI)  $[M+H]^+$  calcd for  $\text{C}_{24}\text{H}_{22}\text{NO}_4$ : 388.1543, found: 388.1550.

HPLC Conditions: 10% IPA/ Hexanes, 1.0 mL/min, Daicel Chiralpak OD-H column,  $\lambda = 220$  nm,  $t_R$  (min): minor = 12.5 min, major = 15.0 min; ee = 94%.

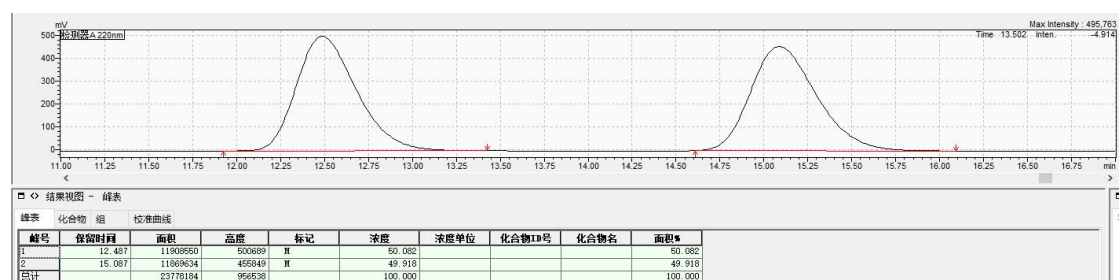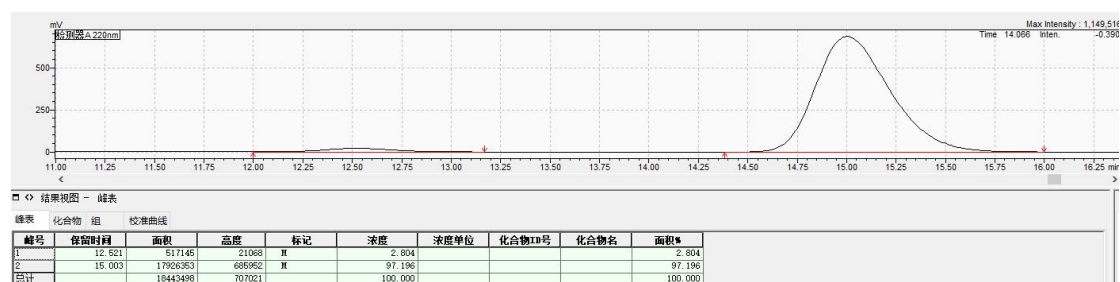

Annotation: Peak number ( **峰号** ), Retention Time (min) ( **保留时间** ), Area (mV\*min) ( **面积** ), Height (mV) ( **高度** ), Labeled peak ( **标记** ), Concentration ( **浓度** ) and Relative Area (%) ( **面积%** ).

**(R)-benzyl**

**2-(4-fluorophenyl)-6-methoxy-4-oxo-3,4-dihydroquinoline-1(2H)-carboxylate**

**(26)**

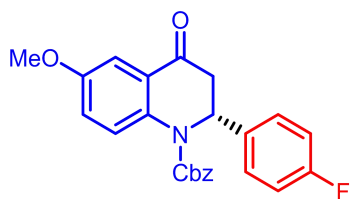

Colorless oil (97% isolated yield, 39.2 mg, 0.1 mmol), column chromatography purification using petroleum ether/EtOAc(10:1, v/v) as eluents.

$^1\text{H}$  NMR (500 MHz,  $\text{CDCl}_3$ )  $\delta$  7.64 (d,  $J = 9.2$  Hz, 1H), 7.39-7.32 (m, 6H), 7.15-7.12 (m, 2H), 7.03 (dd,  $J_1 = 9.2$  Hz,  $J_2 = 3.1$  Hz, 1H), 6.90-6.86 (m, 2H), 6.18-6.17 (m, 1H), 5.38 (d,  $J = 12.3$  Hz, 1H), 5.31 (d,  $J = 12.3$  Hz, 1H), 3.76 (s, 3H), 3.27-3.25 (m, 2H).

$^{13}\text{C}$  NMR (126 MHz,  $\text{CDCl}_3$ )  $\delta$  192.7, 162.2 (d,  $J = 247.0$  Hz), 156.3, 154.5, 135.7, 134.9, 134.1 (d,  $J = 3.4$  Hz), 128.9, 128.7, 128.5 (d,  $J = 8.3$  Hz), 128.3, 126.3, 125.9, 122.9, 115.7 (d,  $J = 21.4$  Hz), 108.4, 68.6, 55.8, 55.7, 42.5.

HRMS (ESI)  $[\text{M}+\text{H}]^+$  calcd for  $\text{C}_{24}\text{H}_{21}\text{FNO}_4$ : 406.1449, found: 406.1440.

$[\alpha]_{\text{D}}^{30} = +78.1^\circ$  ( $c$  0.1,  $\text{CHCl}_3$ ).

EIPA/ Hexanes (10:90), 1.0 mL/min, Daicel Chiralpak OD-H column,  $\lambda = 220$  nm,  $t_{\text{R}}$  (min): minor = 14.1 min, major = 17.9 min; ee = 94%.

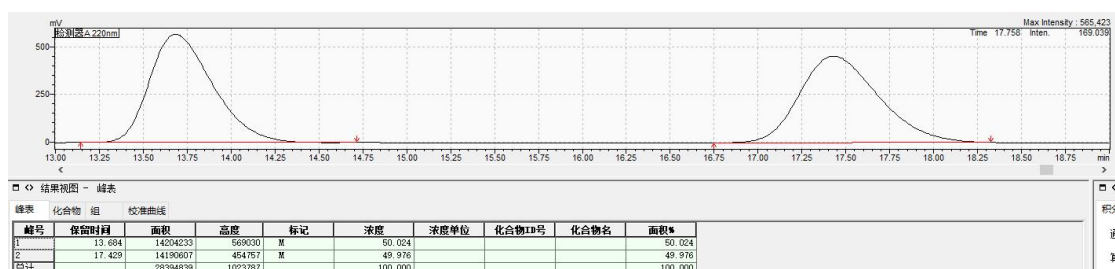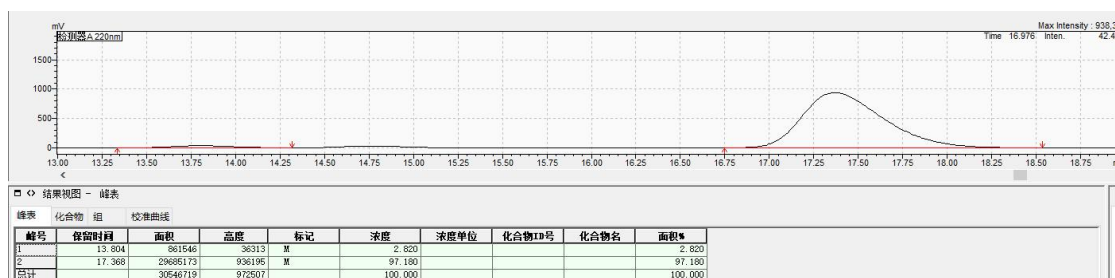

Annotation: Peak number (峰号), Retention Time (min) (保留时间), Area (mV\*min) (面积), Height (mV) (高度), Labeled peak (标记), Concentration (浓度) and Relative Area (%). (面积%).

**(R)-benzyl 6-fluoro-4-oxo-2-phenyl-3,4-dihydroquinoline-1(2H)-carboxylate (27)**

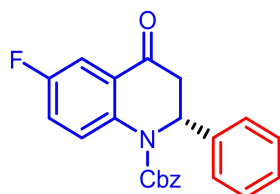

White solid (80% isolated yield, 30.0 mg, 0.1 mmol), mp: 148.8-151.7 °C, column chromatography purification using petroleum ether/EtOAc (5:1, v/v) as eluents.

<sup>1</sup>H NMR (500 MHz, CDCl<sub>3</sub>) δ 7.84 (dd, *J*<sub>1</sub> = 9.4 Hz, *J*<sub>2</sub> = 4.5 Hz, 1H), 7.59 (dd, *J*<sub>1</sub> = 8.3 Hz, *J*<sub>2</sub> = 3.1 Hz, 1H), 7.44-7.41 (m, 5H), 7.30-7.18 (m, 6H), 6.29 (dd, *J*<sub>1</sub> = 5.5 Hz, *J*<sub>2</sub> = 2.2 Hz, 1H), 5.45 (d, *J* = 12.2 Hz, 1H), 5.38 (d, *J* = 12.3 Hz, 1H), 3.41-3.30 (m, 2H).

<sup>13</sup>C NMR (126 MHz, CDCl<sub>3</sub>) δ 192.0, 159.1 (d, *J* = 246.3 Hz), 154.4, 137.8, 137.7 (d, *J* = 2.6 Hz), 135.6, 128.9 (d, *J* = 2.5 Hz), 128.7, 128.3, 127.9, 126.82, 126.76, 126.7, 126.6, 121.9 (d, *J* = 23.4 Hz), 112.6 (d, *J* = 23.2 Hz), 68.8, 56.2, 42.2.

HRMS (ESI) [M+H]<sup>+</sup> calcd for C<sub>23</sub>H<sub>19</sub>FNO<sub>3</sub>: 376.1344, found: 376.1350.

[α]<sub>D</sub><sup>27</sup> = +91.6° (c 0.1, CHCl<sub>3</sub>).

HPLC Conditions: IPA/ Hexanes (10:90), 1.0 mL/min, Daicel Chiralpak OD-H column, λ = 220 nm, t<sub>R</sub> (min): minor = 15.6 min, major = 20.5 min; ee = 90 %.

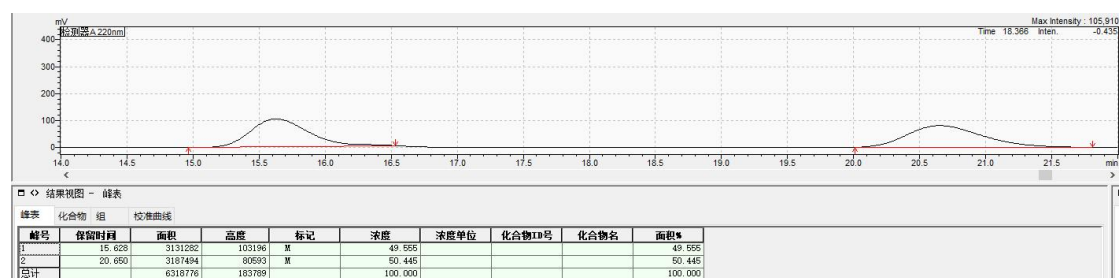

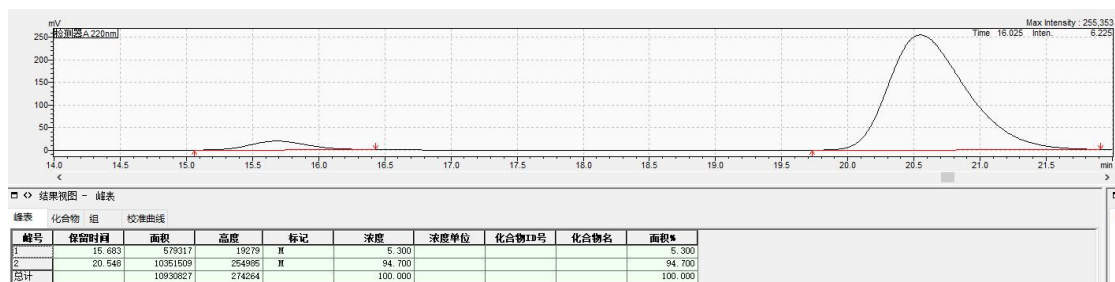

Annotation: Peak number (峰号), Retention Time (min) (保留时间), Area (mV\*min) (面积), Height (mV) (高度), Labeled peak (标记), Concentration (浓度) and Relative Area (%). (面积%).

**(R)-benzyl**

**6-fluoro-2-(4-fluorophenyl)-4-oxo-3,4-dihydroquinoline-1(2H)-carboxylate (28)**

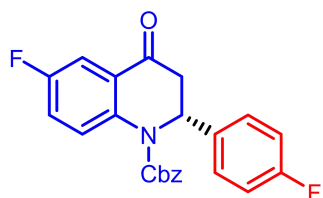

Colorless oil (44% isolated yield, 17.3 mg, 0.1 mmol), column chromatography purification using petroleum ether: EtOAc (5:1, v/v) as eluents.

$^1\text{H}$  NMR (500 MHz,  $\text{CDCl}_3$ )  $\delta$  7.75 (dd,  $J_1 = 9.4$  Hz,  $J_2 = 4.4$  Hz, 1H), 7.55 (dd,  $J_1 = 8.3$  Hz,  $J_2 = 3.2$  Hz, 1H), 7.42-7.36 (m, 5H), 7.18-7.09 (m, 3H), 6.93-6.87 (m, 2H), 6.21-6.20 (m, 1H), 5.39 (d,  $J = 12.3$  Hz, 1H), 5.33 (d,  $J = 12.3$  Hz, 1H), 3.29-2.28 (m, 2H).

$^{13}\text{C}$  NMR (126 MHz,  $\text{CDCl}_3$ )  $\delta$  191.8, 162.3 (d,  $J = 247.2$  Hz), 159.2 (d,  $J = 246.7$  Hz), 154.3, 137.5, 135.5, 133.7 (d,  $J = 3.3$  Hz), 128.9, 128.8, 128.5 (d,  $J = 8.4$  Hz), 128.4, 126.8 (d,  $J = 7.2$  Hz), 126.5 (d,  $J = 6.3$  Hz), 122.1 (d,  $J = 23.5$  Hz), 115.8 (d,  $J = 21.5$  Hz), 112.7 (d,  $J = 23.1$  Hz), 68.9, 55.7, 42.3.

HRMS (ESI)  $[\text{M}+\text{H}]^+$  calcd for  $\text{C}_{23}\text{H}_{18}\text{F}_2\text{NO}_3$ : 394.1249, found: 394.1240.

$[\alpha]_{\text{D}}^{31} = +93.1^\circ$  (c 0.1,  $\text{CHCl}_3$ ).

HPLC Conditions: IPA/ Hexanes (10:90), 1.0 mL/min, Daicel Chiralpak OD-H column,  $\lambda = 220$  nm,  $t_{\text{R}}$  (min): minor = 15.9 min, major = 22.8 min; ee = 92%.

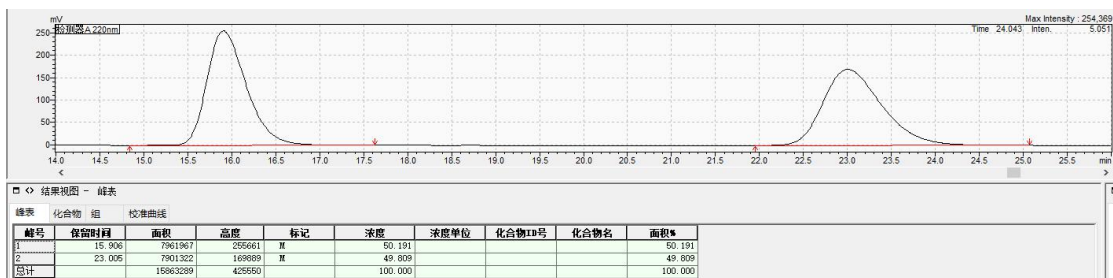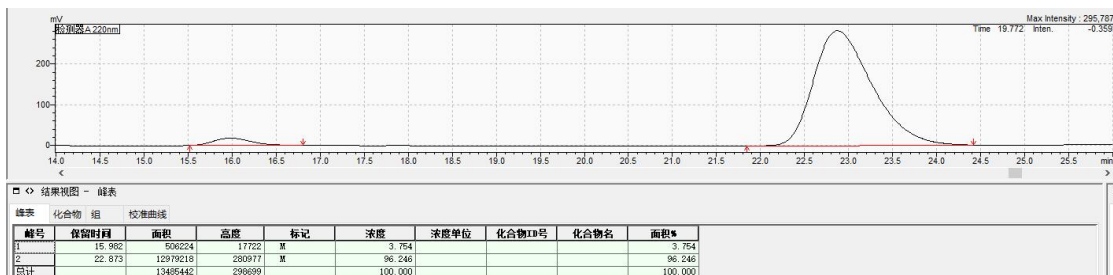

Annotation: Peak number (峰号), Retention Time (min) (保留时间), Area (mV\*min) (面积), Height (mV) (高度), Labeled peak (标记), Concentration (浓度) and Relative Area (%) (面积%)

### (R)-benzyl 6-methyl-4-oxo-2-phenyl-3,4-dihydroquinoline-1(2H)-carboxylate (29)

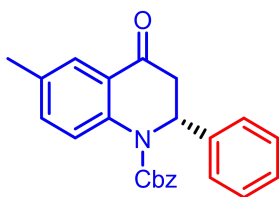

White solid (54% isolated yield, 20.0 mg, 0.1 mmol), mp: 165.0-167.3 °C, column chromatography purification using petroleum ether/EtOAc (10:1, v/v) as eluents.

<sup>1</sup>H NMR (500 MHz, CHCl<sub>3</sub>) δ 7.68 (d, *J* = 2.4 Hz, 2H), 7.41-7.34 (m, 5H), 7.27-7.25 (m, 1H), 7.23-7.16 (m, 5H), 6.22 (t, *J* = 3.9 Hz, 1H), 5.39 (d, *J* = 12.3 Hz, 1H), 5.31 (d, *J* = 12.3 Hz, 1H), 3.29-3.28 (m, 2H), 2.26 (s, 3H).

<sup>13</sup>C NMR (126 MHz, CHCl<sub>3</sub>) δ 193.2, 154.5, 139.2, 138.3, 135.8, 135.7, 134.1, 128.8, 128.7, 128.6, 128.3, 127.7, 126.9, 126.7, 124.9, 124.5, 68.6, 56.2, 42.5, 20.7.

HRMS (ESI) [M+H]<sup>+</sup> calcd for C<sub>24</sub>H<sub>22</sub>NO<sub>3</sub>: 372.1594, found: 372.1600.

[α]<sub>D</sub><sup>27</sup> = + 99.7° (c 0.1, CHCl<sub>3</sub>).

HPLC Conditions: IPA/ Hexanes (10:90), 1.0 mL/min, Daicel Chiralpak IC column,  $\lambda = 220$  nm,  $t_R$  (min): minor = 34.7 min, major = 36.2 min; ee = 71%.

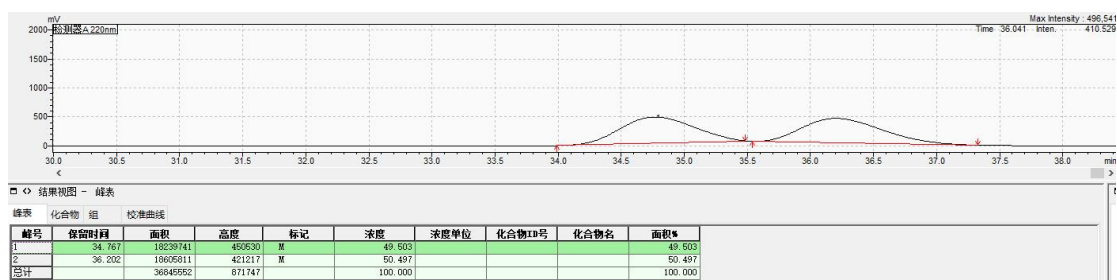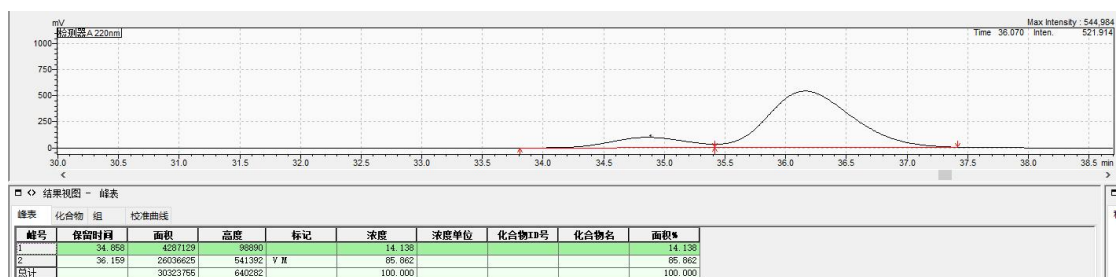

Annotation: Peak number (  ), Retention Time (min) (  ), Area (mV\*min) (  ), Height (mV) (  ), Labeled peak (  ), Concentration (  ) and Relative Area (%) (  ).

## (R)-benzyl

### 2-(4-fluorophenyl)-6-methyl-4-oxo-3,4-dihydroquinoline-1(2H)-carboxylate (30)

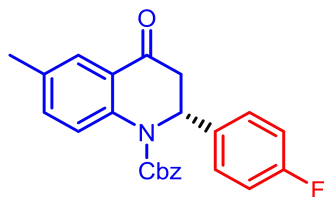

White solid (49% isolated yield, 19.0 mg, 0.1 mmol), mp: 133.9-136.1 °C, column chromatography purification using petroleum ether/EtOAc (10:1, v/v) as eluents.

$^1\text{H}$  NMR (400 MHz,  $\text{CHCl}_3$ )  $\delta$  7.69 (d,  $J = 2.3$  Hz, 1H), 7.64 (d,  $J = 8.5$  Hz, 1H), 7.40-7.35 (m, 5H), 7.28-7.25 (m, 1H), 7.17-7.13 (m, 2H), 6.90-6.87 (m, 2H), 6.20-6.17 (m, 1H), 5.39 (d,  $J = 12.3$  Hz, 1H), 5.31 (d,  $J = 12.3$  Hz, 1H), 3.32-3.21 (m, 2H), 2.27 (s, 3H).

$^{13}\text{C}$  NMR (101 MHz,  $\text{CHCl}_3$ )  $\delta$  192.9, 162.1 (d,  $J = 246.8$  Hz), 154.4, 138.9, 135.8, 135.7, 134.3, 134.1 (d,  $J = 3.3$  Hz), 128.8, 128.6, 128.5 (d,  $J = 8.2$  Hz), 128.3, 126.9, 124.8, 124.5, 115.7 (d,  $J = 21.6$  Hz), 68.7, 55.7, 42.5, 20.7.

HRMS (ESI)  $[\text{M}+\text{H}]^+$  calcd for  $\text{C}_{24}\text{H}_{21}\text{FNO}_3$ : 390.1500, found: 390.1509.

$[\alpha]_{\text{D}}^{30} = +101.6^\circ$  ( $c$  0.1,  $\text{CHCl}_3$ ).

HPLC Conditions: IPA/ Hexanes (20:80), 1.0 mL/min, Daicel Chiralpak IC column,  $\lambda = 220$  nm,  $t_{\text{R}}$  (min): minor = 15.4 min, major = 16.5 min; ee = 87%.

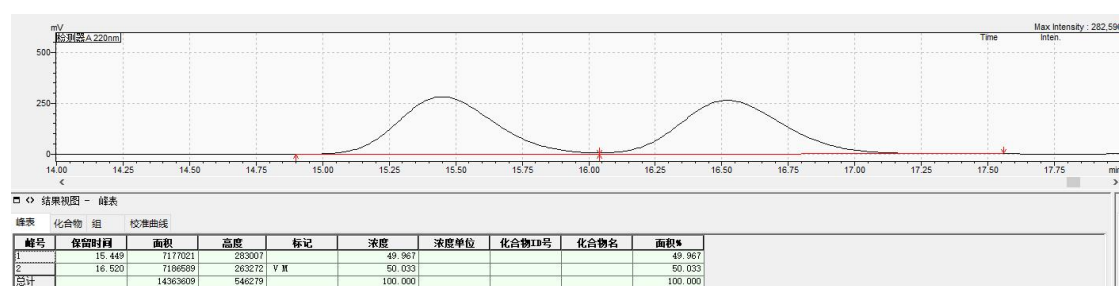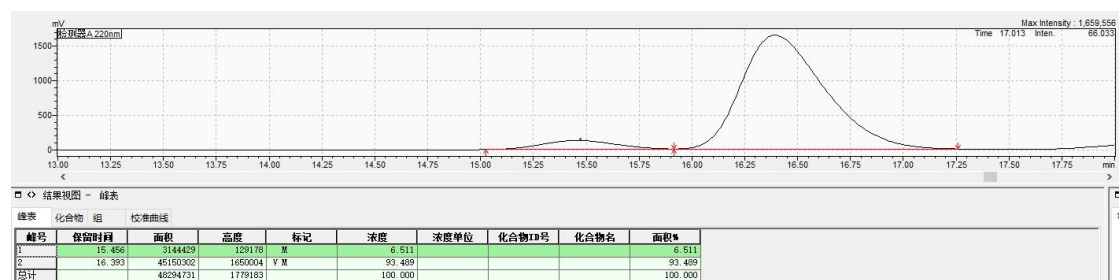

Annotation: Peak number (峰号), Retention Time (min) (保留时间), Area ( $\text{mV} \cdot \text{min}$ ) (面积), Height (mV) (高度), Labeled peak (标记), Concentration (浓度) and Relative Area (%) (面积%).

(*R*)-benzyl

2-(4-(tert-butyl)phenyl)-6-methyl-4-oxo-3,4-dihydroquinoline-1(2H)-carboxylate

(31)

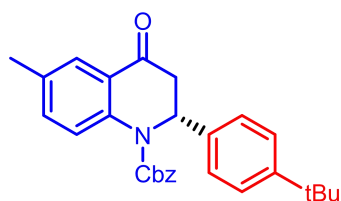



Yellow oil (58% isolated yield, 25.0 mg, 0.1 mmol), column chromatography purification using petroleum ether/EtOAc (10:1, v/v) as eluents.

$^1\text{H}$  NMR (400 MHz,  $\text{CHCl}_3$ )  $\delta$  7.73-7.70 (m, 2H), 7.41-7.34 (m, 6H), 7.22-7.20 (m, 2H), 7.11-7.09 (m, 2H), 6.18 (t,  $J = 4.0$  Hz, 1H), 5.39 (d,  $J = 12.3$  Hz, 1H), 5.29 (d,  $J = 12.3$  Hz, 1H), 3.27 (d,  $J = 4.0$  Hz, 2H), 2.28 (s, 3H), 1.22 (s, 9H).

$^{13}\text{C}$  NMR (101 MHz,  $\text{CHCl}_3$ )  $\delta$  193.3, 154.5, 150.5, 139.4, 135.8, 135.7, 135.3, 133.9, 128.8, 128.6, 128.3, 126.9, 126.4, 125.7, 124.9, 124.4, 68.5, 56.1, 42.6, 34.5, 31.3, 20.7.

HRMS (ESI)  $[\text{M}+\text{H}]^+$  calcd for  $\text{C}_{28}\text{H}_{30}\text{NO}_3$ : 428.2220, found: 428.2214.

$[\alpha]_{\text{D}}^{25} = +23.3^\circ$  ( $c$  0.1,  $\text{CHCl}_3$ ).

HPLC Conditions: IPA/ Hexanes (10:90), 1.0 mL/min, Daicel Chiralpak IC column,  $\lambda = 220$  nm,  $t_{\text{R}}$  (min): minor = 13.7 min, major = 17.3 min; ee = 61%.

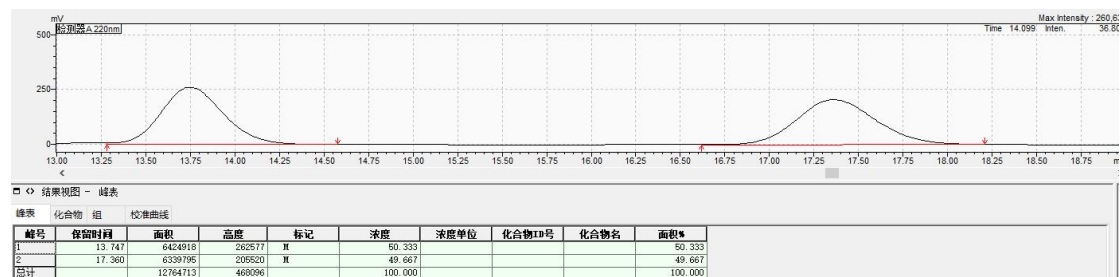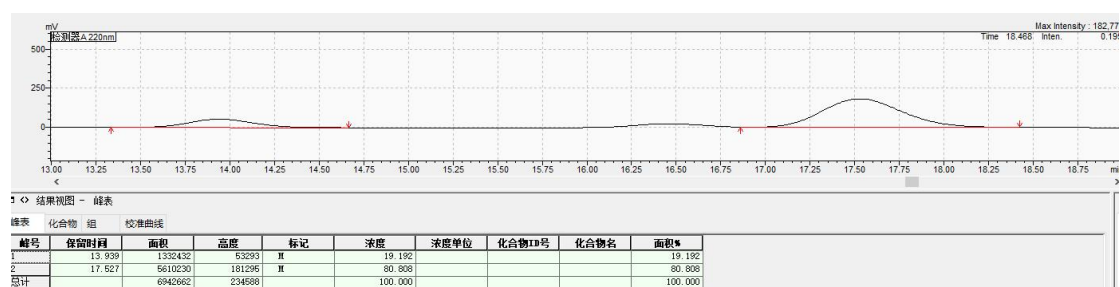

Annotation: Peak number (峰号), Retention Time (min) (保留时间), Area ( $\text{mV} \cdot \text{min}$ ) (面积), Height (mV) (高度), Labeled peak (标记), Concentration (浓度) and Relative Area (%) (面积%).

**(R)-2-(4-chlorophenyl)-6-fluorochroman-4-one (32)**

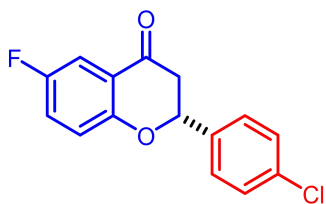

Yellow solid (55% isolated yield, 30.3 mg and 5.3 mg substrate, 0.2 mmol), column chromatography purification using petroleum ether/EtOAc (20:1, v/v) as eluents.

The NMR data and HRMS data are in accordance with that of previous publications (*J Agric Food Chem.* **2022**, *70*, 3409-3419. )

$^1\text{H}$  NMR (500 MHz,  $\text{CDCl}_3$ )  $\delta$  7.57 (dd,  $J_1 = 8.1$ ,  $J_2 = 3.3$  Hz, 1H), 7.44 - 7.38 (m, 4H), 7.26 - 7.22 (m, 1H), 7.04 (dd,  $J_1 = 9.1$ ,  $J_2 = 4.1$  Hz, 1H), 5.45 (dd,  $J_1 = 13.2$ ,  $J_2 = 3.0$  Hz, 1H), 3.02 (dd,  $J_1 = 16.8$ ,  $J_2 = 13.1$  Hz, 1H), 2.89 (dd,  $J_1 = 17.1$ ,  $J_2 = 3.0$  Hz, 1H).

$^{13}\text{C}$  NMR (126 MHz,  $\text{CDCl}_3$ )  $\delta$  190.9, 157.7, 157.6 (d,  $J=243.1$  Hz), 137.1, 134.9, 129.2, 127.6, 124.0 (d,  $J = 24.2$  Hz), 121.5 (d,  $J = 7.0$  Hz), 119.9 (d,  $J = 7.3$  Hz), 112.2 (d,  $J= 23.2$  Hz), 79.2, 44.4.

mp: 119.3-4 - 120.5 °C.

$[\alpha]_{\text{D}}^{20} = +46^\circ$  (c 0.1,  $\text{CHCl}_3$ ).

HRMS (ESI)  $[\text{M}+\text{H}]^+$  calcd for  $\text{C}_{15}\text{H}_{11}\text{O}_2\text{FCl}$ : 277.0426, found: 277.0424.

HPLC Conditions: 10% IPA/ Hexanes, 0.9 mL/min, Daicel Chiralpak OD-H column,  $\lambda = 220$  nm,  $t_{\text{R}}$  (min): minor = 10.3 min, major = 12.4 min. ee = 94%.

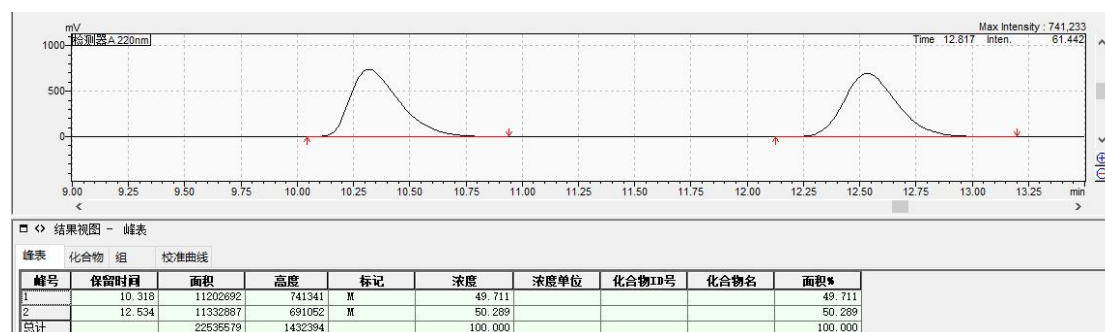

NL11:

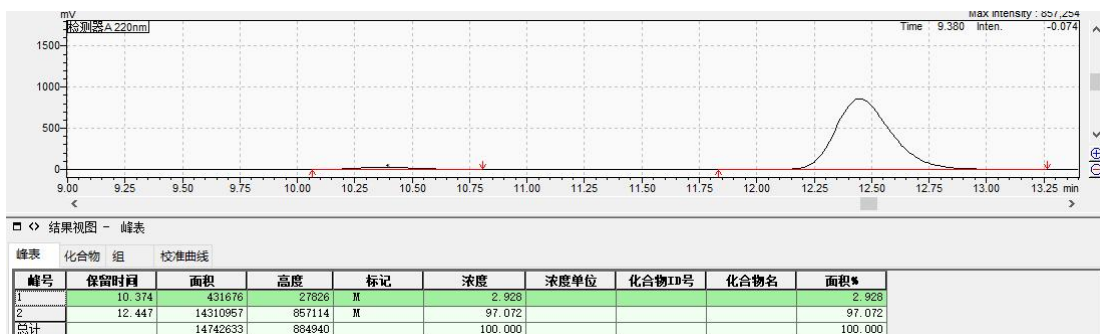

L5:

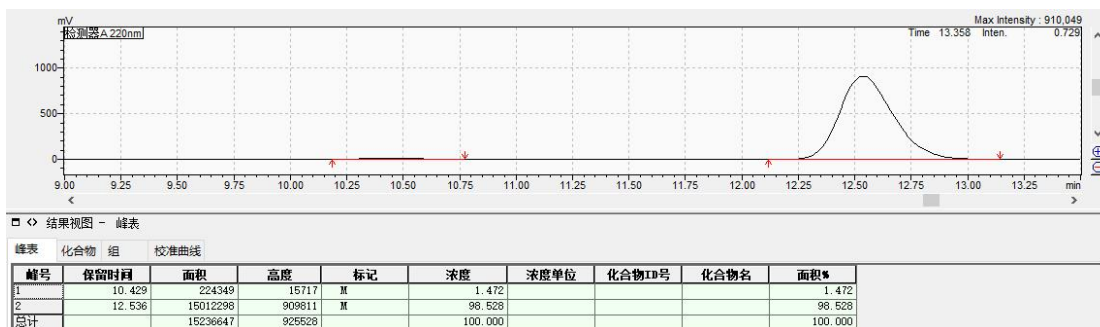

Annotation: Peak number (  ), Retention Time (min) (  ), Area (mV\*min) (  ), Height (mV) (  ), Labeled peak (  ), Concentration (  ) and Relative Area (%) (  ).

### (R)-6-fluoro-2-(4-(trifluoromethyl)phenyl)chroman-4-one (33)

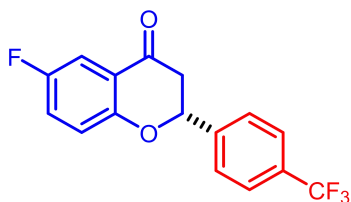

White solid (44% isolated yield, 27.3 mg, 0.2 mmol), mp: 121.4 - 125.7 °C, column chromatography purification using petroleum ether/EtOAc (10:1, v/v) as eluents.

The NMR data and HRMS data are in accordance with that of previous publications (*J Agric Food Chem.* **2022**, *70*, 3409-3419. )

<sup>1</sup>H NMR (500 MHz, CDCl<sub>3</sub>) δ 7.70 (d, *J* = 8.1 Hz, 2H), 7.61 - 7.56 (m, 3H), 7.27 - 7.22 (m, 1H), 7.05 (dd, *J*<sub>1</sub> = 8.9, *J*<sub>2</sub> = 4.2 Hz, 1H), 5.53 (dd, *J*<sub>1</sub> = 13.1, *J*<sub>2</sub> = 3.2 Hz, 1H), 3.02 (dd, *J*<sub>1</sub> = 17.1, *J*<sub>2</sub> = 13.1 Hz, 1H), 2.92 (dd, *J*<sub>1</sub> = 17.0, *J*<sub>2</sub> = 3.3 Hz, 1H).

<sup>13</sup>C NMR (126 MHz, CDCl<sub>3</sub>) δ 190.6, 157.7 (d, *J* = 242.7 Hz), 157.5, 142.5, 131.2 (d,

$J = 32.5$  Hz), 126.5, 126.1 (q,  $J = 4.0, 3.6$  Hz), 124.1 (d,  $J = 24.3$  Hz), 124.0 (d,  $J = 272.5$  Hz), 121.5 (d,  $J = 7.0$  Hz), 120.0 (d,  $J = 7.3$  Hz), 112.3 (d,  $J = 23.1$  Hz), 79.1, 44.5.

$[\alpha]_D^{20} = +47^\circ$  (c 0.1,  $\text{CHCl}_3$ ).

HRMS (ESI)  $[M+H]^+$  calcd for  $\text{C}_{16}\text{H}_{11}\text{O}_2\text{F}_4$ : 311.0690, found: 311.0669.

HPLC Conditions: 10% IPA/ Hexanes, 0.9 mL/min, Daicel Chiralpak OD-H column,  $\lambda = 220$  nm,  $t_R$  (min): minor = 8.6 min, major = 11.4 min. ee = 95%.

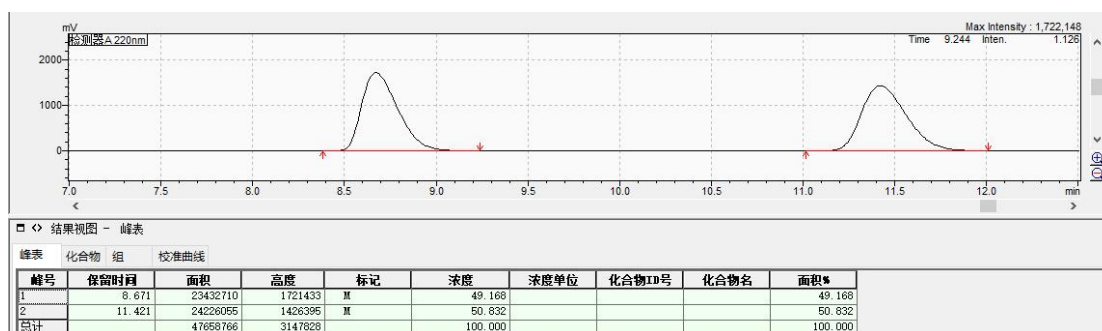

NL11:

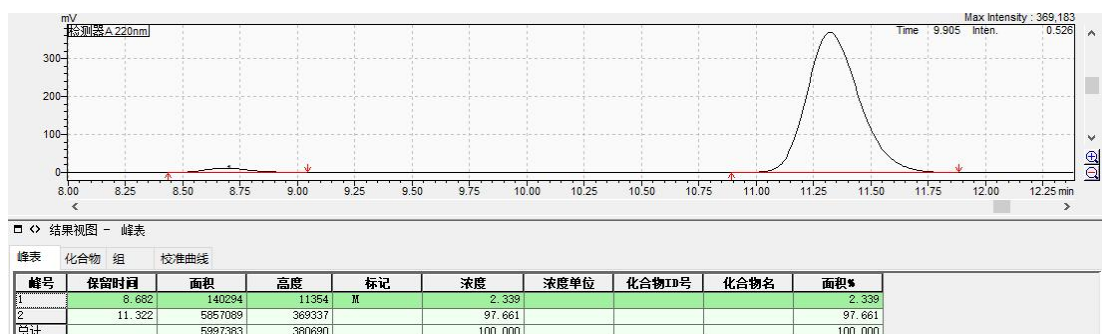

L5:

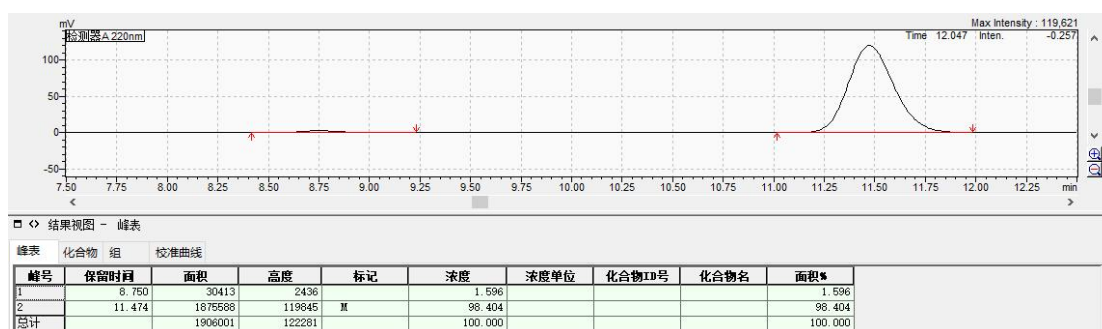

Annotation: Peak number (峰号), Retention Time (min) (保留时间), Area (mV\*min) (面积), Height (mV) (高度), Labeled peak (标记), Concentration (浓度) and Relative Area (%) (面积%).

### (R)-6-fluoro-2-(p-tolyl)chroman-4-one (34)

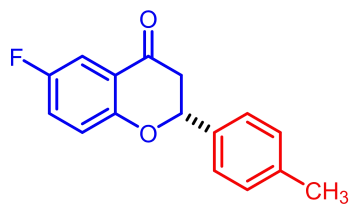

White solid (49% isolated yield, 25.1 mg, 0.2 mmol), mp: 88.5 - 89.5 °C, column chromatography purification using petroleum ether/EtOAc (10:1, v/v) as eluents.

Synthesized according to the general procedure and purified by flash chromatography (10:1 petroleum ether /EtOAc) to afford a yellow solid. (25.1 mg, 49% yield)

The NMR data and HRMS data are in accordance with that of previous publications (*J Agric Food Chem.* **2022**, *70*, 3409-3419. )

<sup>1</sup>H NMR (500 MHz, CDCl<sub>3</sub>) δ 7.56 (dd, *J*<sub>1</sub> = 8.3, *J*<sub>2</sub> = 3.2 Hz, 1H), 7.36 - 7.35 (m, 2H), 7.25 - 7.19 (m, 3H), 7.01 (dd, *J*<sub>1</sub> = 9.1, *J*<sub>2</sub> = 4.0 Hz, 1H), 5.42 (dd, *J*<sub>1</sub> = 13.6, *J*<sub>2</sub> = 2.8 Hz, 1H), 3.07 (dd, *J*<sub>1</sub> = 16.9, *J*<sub>2</sub> = 13.4 Hz, 1H), 2.87 (dd, *J*<sub>1</sub> = 17.1, *J*<sub>2</sub> = 2.9 Hz, 1H), 2.38 (s, 3H).

<sup>13</sup>C NMR (126 MHz, CDCl<sub>3</sub>) δ 191.6, 158.0, 157.5 (d, *J* = 242.5 Hz), 139.0, 135.6, 129.7, 126.3, 123.8 (d, *J* = 24.3 Hz), 121.5 (d, *J* = 6.1 Hz), 120.0 (d, *J* = 7.3 Hz), 112.0 (d, *J* = 23.8 Hz), 79.9, 44.3, 21.3.

[α]<sub>D</sub><sup>11</sup> = +31° (c 0.1, CHCl<sub>3</sub>).

HRMS (ESI) [M+H]<sup>+</sup> calcd for C<sub>16</sub>H<sub>14</sub>O<sub>2</sub>F: 257.0972, found: 257.0970.

HPLC Conditions: 10% IPA/ Hexanes, 0.9 mL/min, Daicel Chiralpak OD-H column, λ = 220 nm, t<sub>R</sub> (min): minor = 8.7 min, major = 10.4 min. ee = 92%.

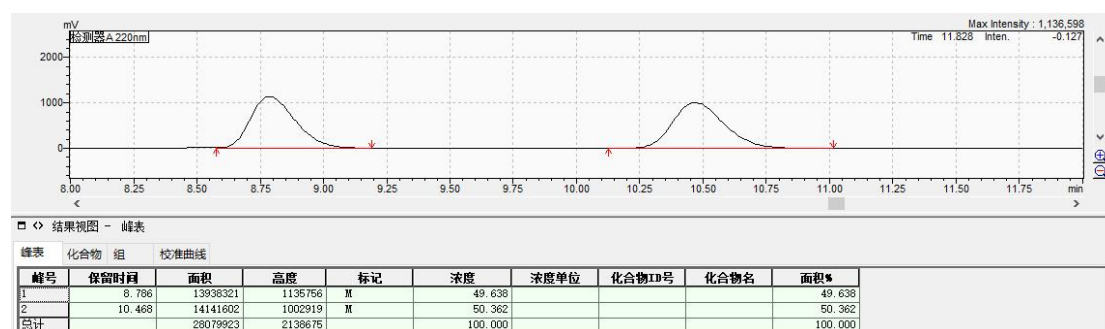

NL11:

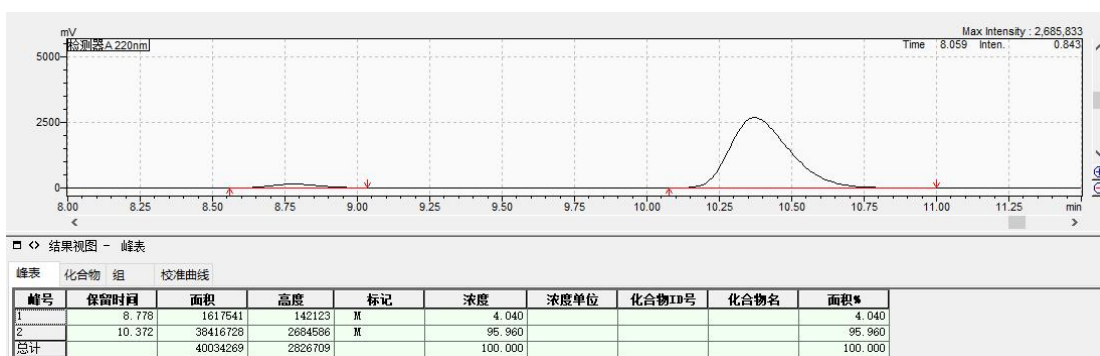

L5:

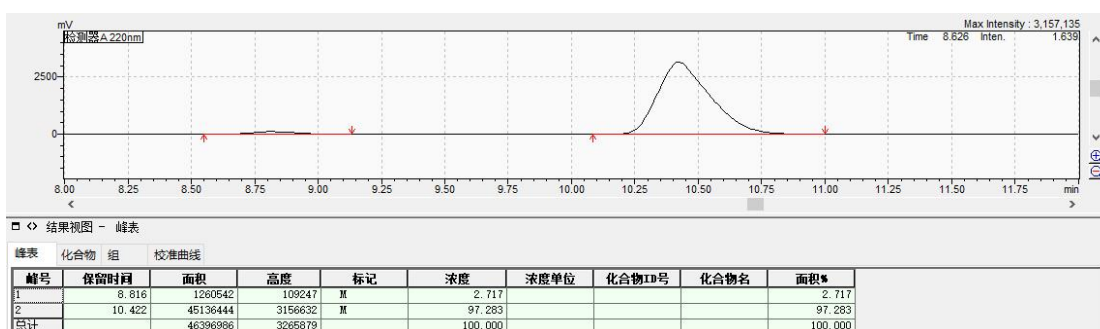

Annotation: Peak number (峰号), Retention Time (min) (保留时间), Area (mV\*min) (面积), Height (mV) (高度), Labeled peak (标记), Concentration (浓度) and Relative Area (%). (面积%).

### (R)-6-chloro-2-(4-fluorophenyl)chroman-4-one (35)

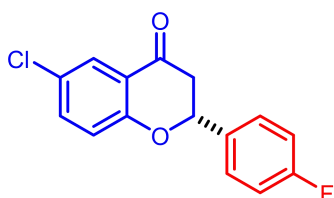

Yellow solid (51% isolated yield, 28.2 mg, 0.2 mmol), mp: 91.3 – 93.4 °C, column chromatography purification using petroleum ether/EtOAc (10:1, v/v) as eluents.

<sup>1</sup>H NMR (400 MHz, CDCl<sub>3</sub>) δ 7.89 (d, *J* = 2.7 Hz, 1H), 7.49 – 7.39 (m, 6H), 7.02 (d, *J* = 8.8 Hz, 1H), 5.47 (dd, *J*<sub>1</sub> = 13.3, *J*<sub>2</sub> = 3.0 Hz, 1H), 3.08 (dd, *J*<sub>1</sub> = 17.0, *J*<sub>2</sub> = 13.2 Hz, 1H), 2.91 (dd, *J*<sub>1</sub> = 17.0, *J*<sub>2</sub> = 3.0 Hz, 1H).

<sup>13</sup>C NMR (101 MHz, CDCl<sub>3</sub>) δ 190.9, 160.1, 138.4, 136.1, 129.1, 129.0, 127.3, 126.5, 126.3, 121.8, 120.0, 79.9, 44.4.

[α]<sub>D</sub><sup>12</sup> = +53° (c 0.1, CHCl<sub>3</sub>).

HRMS (ESI)  $[M-H]^-$  calcd for  $C_{15}H_9ClFO_2$ : 275.0281, found: 275.0284.

HPLC Conditions: 10% IPA/ Hexanes, 0.9 mL/min, Daicel Chiralpak OD-H column,  
 $\lambda = 220$  nm,  $t_R$  (min): minor = 10.6 min, major = 14.8 min. ee = 96%.

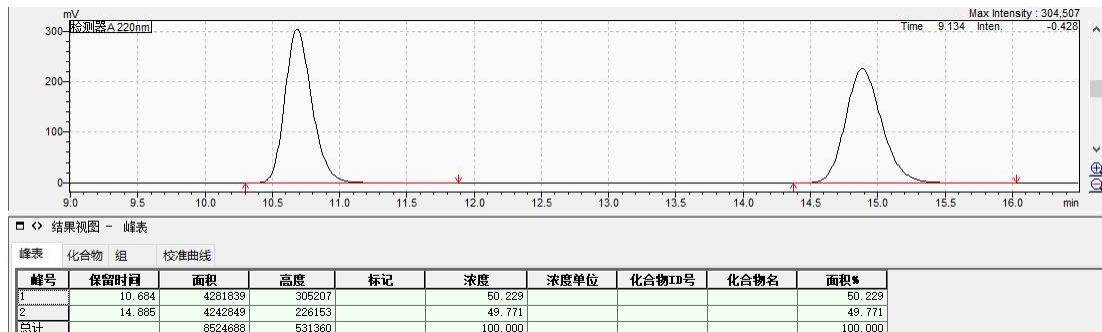

NL11:

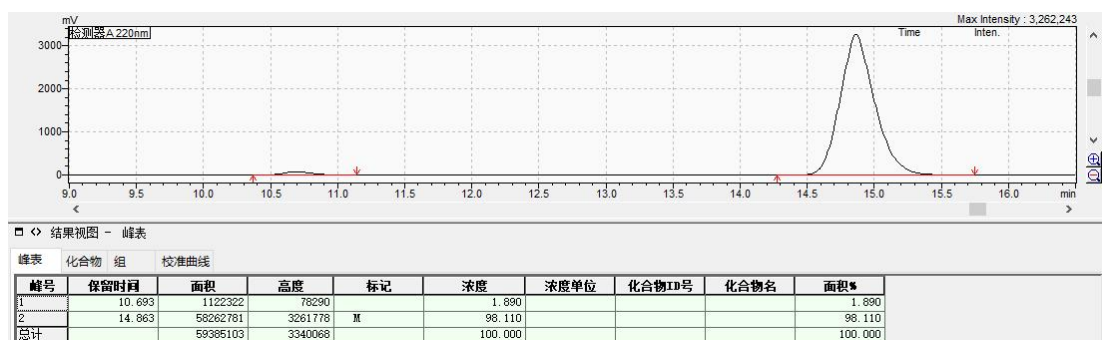

L5:

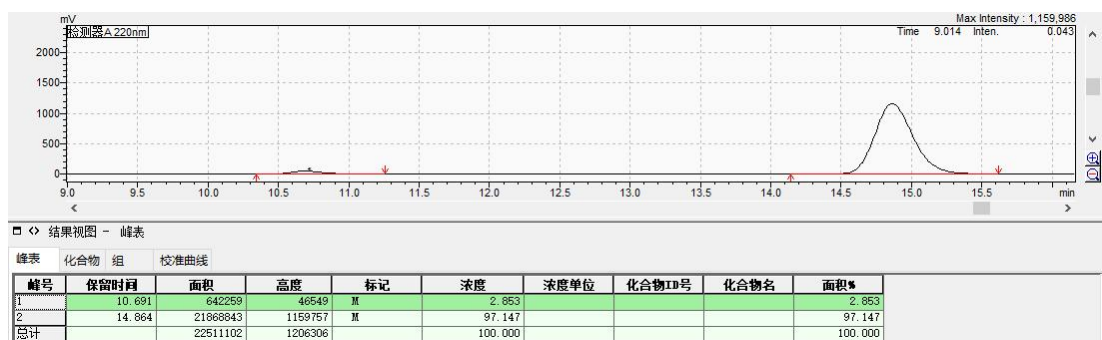

Annotation: Peak number (峰号), Retention Time (min) (保留时间), Area (mV\*min) (面积), Height (mV) (高度), Labeled peak (标记), Concentration (浓度) and Relative Area (%). (面积%).

(R)-6-chloro-2-(p-tolyl)chroman-4-one (36)



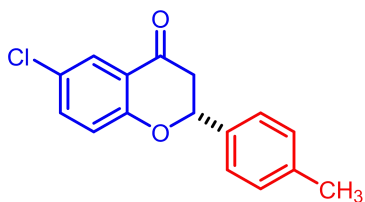

Yellow solid (44% isolated yield, 23.9 mg, 0.2 mmol), mp: 73.2 °C, column chromatography purification using petroleum ether/EtOAc (10:1, v/v) as eluents.

$^1\text{H}$  NMR (400 MHz,  $\text{CDCl}_3$ )  $\delta$  7.79 (d,  $J = 2.7$  Hz, 1H), 7.40 – 7.30 (m, 1H), 7.27 (d,  $J = 8.1$  Hz, 2H), 7.19 – 7.11 (m, 2H), 6.91 (d,  $J = 8.8$  Hz, 1H), 5.35 (dd,  $J_1 = 13.2$ ,  $J_2 = 2.9$  Hz, 1H), 2.99 (dd,  $J_1 = 17.0$ ,  $J_2 = 13.2$  Hz, 1H), 2.79 (dd,  $J_1 = 17.0$ ,  $J_2 = 2.9$  Hz, 1H), 2.30 (s, 3H).

$^{13}\text{C}$  NMR (101 MHz,  $\text{CDCl}_3$ )  $\delta$  191.1, 160.1, 139.0, 136.1, 135.4, 129.7, 127.2, 126.5, 126.3, 121.8, 120.0, 79.8, 44.2, 21.3.

$[\alpha]_{\text{D}}^{25} = +59^\circ$  ( $c$  0.1,  $\text{CHCl}_3$ ).

HRMS (ESI)  $[\text{M}-\text{H}]^-$  calcd for  $\text{C}_{16}\text{H}_{12}\text{ClO}_2$ : 271.0531, found: 271.0526.

HPLC Conditions: 10% IPA/ Hexanes, 0.9 mL/min, Daicel Chiralpak OD-H column,  $\lambda = 220$  nm,  $t_{\text{R}}$  (min): minor = 9.3 min, major = 11.4 min. ee = 90%.

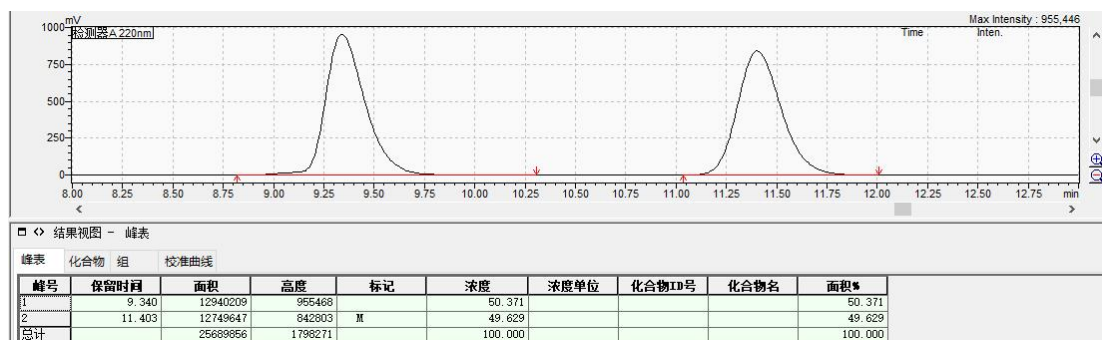

NL11:

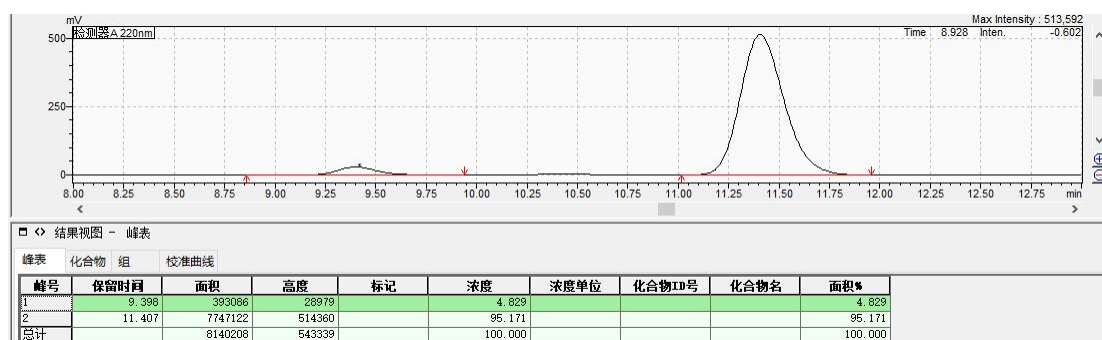

L5:



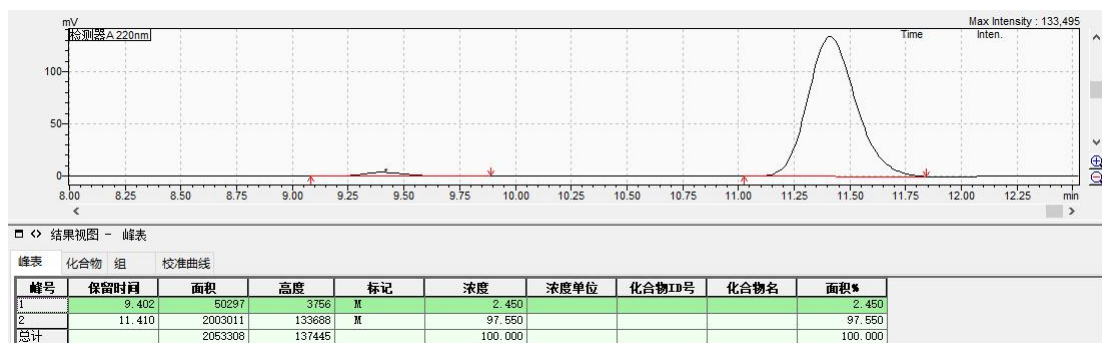

Annotation: Peak number (峰号), Retention Time (min) (保留时间), Area (mV\*min) (面积), Height (mV) (高度), Labeled peak (标记), Concentration (浓度) and Relative Area (%). (面积%).

**(R)-2-(4-(tert-butyl)phenyl)-6-chlorochroman-4-one (37)**

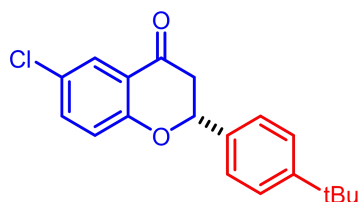

Yellow solid (48% isolated yield, 30.1 mg, 0.2 mmol), mp: 102.2 °C, column chromatography purification using petroleum ether/EtOAc (10:1, v/v) as eluents.

<sup>1</sup>H NMR (400 MHz, CDCl<sub>3</sub>) δ 7.89 (d, *J* = 2.7 Hz, 1H), 7.55 – 7.34 (m, 5H), 7.01 (d, *J* = 8.9 Hz, 1H), 5.45 (dd, *J*<sub>1</sub> = 13.3, *J*<sub>2</sub> = 2.9 Hz, 1H), 3.11 (dd, *J*<sub>1</sub> = 17.0, *J*<sub>2</sub> = 13.3 Hz, 1H), 2.90 (dd, *J*<sub>1</sub> = 17.0, *J*<sub>2</sub> = 2.9 Hz, 1H).

<sup>13</sup>C NMR (101 MHz, CDCl<sub>3</sub>) δ 191.1, 160.2, 152.3, 136.1, 135.3, 127.2, 126.5, 126.2, 126.0, 121.8, 120.0, 79.9, 44.2, 31.4.

[α]<sub>D</sub><sup>14</sup> = +61° (*c* 0.1, CHCl<sub>3</sub>).

HRMS (ESI) [M-H]<sup>-</sup> calcd for C<sub>19</sub>H<sub>18</sub>ClO<sub>2</sub>: 313.1001, found: 313.1001.

HPLC Conditions: 10% IPA/ Hexanes, 0.9 mL/min, Daicel Chiralpak OD-H column, λ = 220 nm, t<sub>R</sub> (min): minor = 6.1 min, major = 10.7 min. ee = 94%.

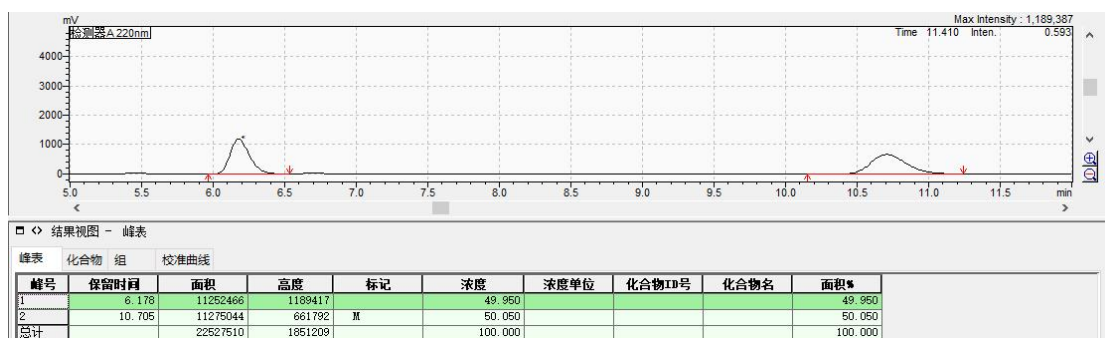

NL11:

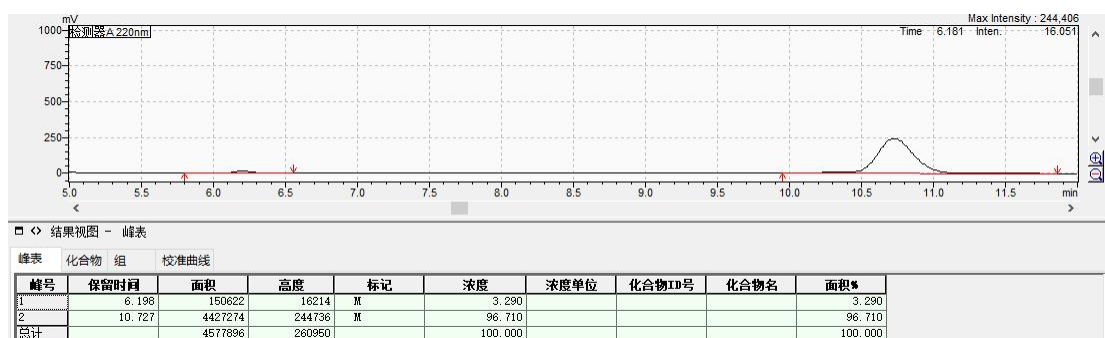

L5:

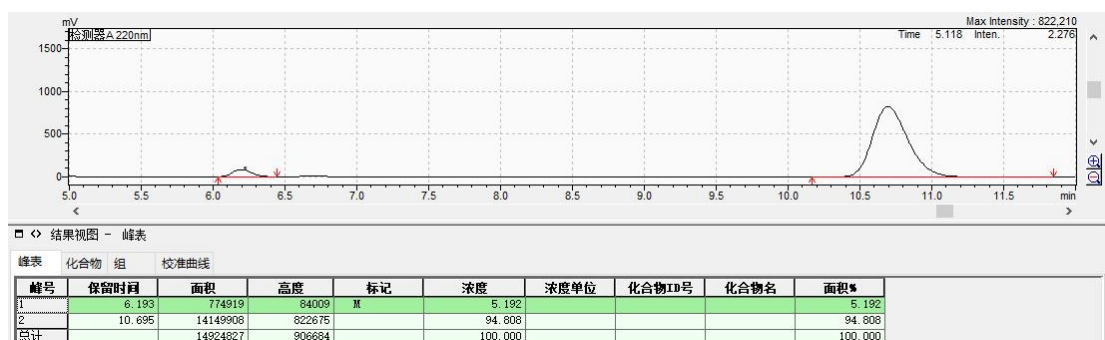

Annotation: Peak number (  ), Retention Time (min) (  ), Area (mV\*min) (  ), Height (mV) (  ), Labeled peak (  ), Concentration (  ) and Relative Area (%) (  ).

**(R)-6-bromo-2-(4-chlorophenyl)chroman-4-one (38)**

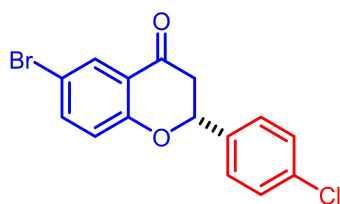

Yellow solid (45% isolated yield, 30.2 mg, 0.2 mmol), mp: 117.9 - 119.9 °C, column chromatography purification using petroleum ether/EtOAc (10:1, v/v) as eluents.

The NMR data and HRMS data are in accordance with that of previous publications (*J Agric Food Chem.* **2022**, *70*, 3409-3419. )

<sup>1</sup>H NMR (500 MHz, CDCl<sub>3</sub>) δ 8.03 (d, *J* = 2.5 Hz, 1H), 7.59 (dd, *J*<sub>1</sub> = 8.9, *J*<sub>2</sub> = 2.5 Hz, 1H), 7.44 -7.39 (m, 4H), 6.96 (d, *J* = 8.6 Hz, 1H), 5.45 (dd, *J*<sub>1</sub> = 13.1, *J*<sub>2</sub> = 2.9 Hz, 1H), 3.03 (dd, *J*<sub>1</sub> = 17.1, *J*<sub>2</sub> = 13.2 Hz, 1H), 2.91 - 2.87 (m, 1H).

<sup>13</sup>C NMR (126 MHz, CDCl<sub>3</sub>) δ 190.4, 160.3, 139.1, 136.9, 135.0, 129.7, 129.3, 127.7, 122.28, 120.3, 114.7, 79.2, 44.3.

[α]<sub>D</sub><sup>10</sup> = +35° (c 0.1, CHCl<sub>3</sub>).

HRMS (ESI) [M+H]<sup>+</sup> calcd for C<sub>15</sub>H<sub>11</sub>O<sub>2</sub>BrCl: 336.9626, found: 336.9623.

HPLC Conditions: 10% IPA/ Hexanes, 0.9 mL/min, Daicel Chiralpak OD-H column, λ = 220 nm, t<sub>R</sub> (min): minor = 12.0 min, major = 14.4 min. ee = 95%.

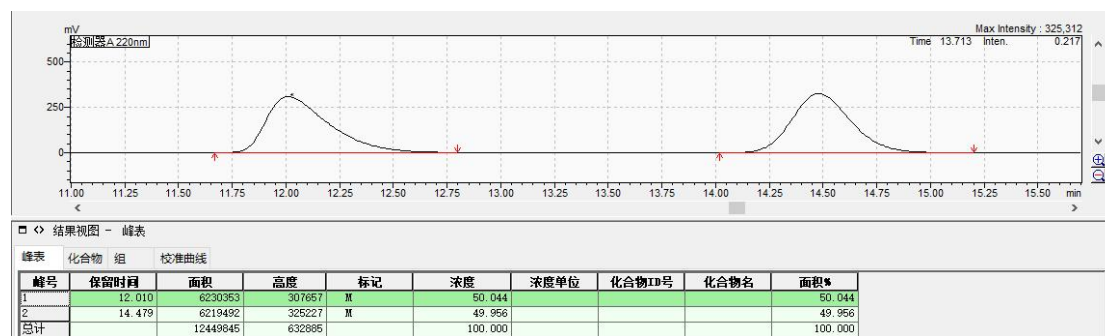

NL11:

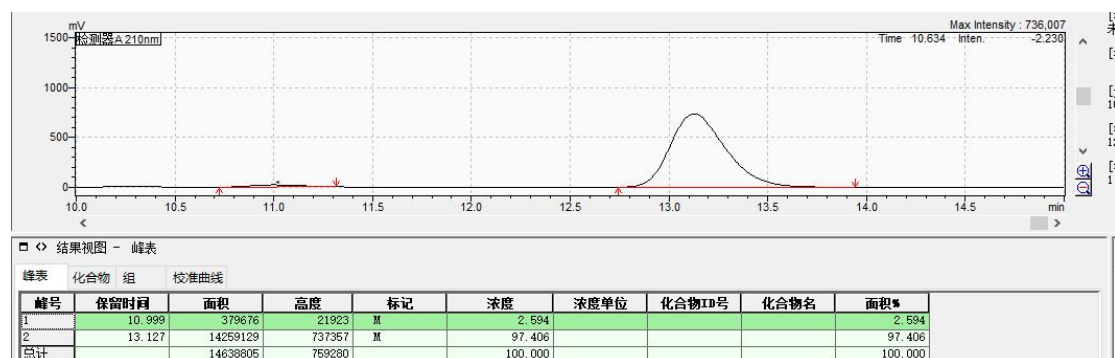

L5:

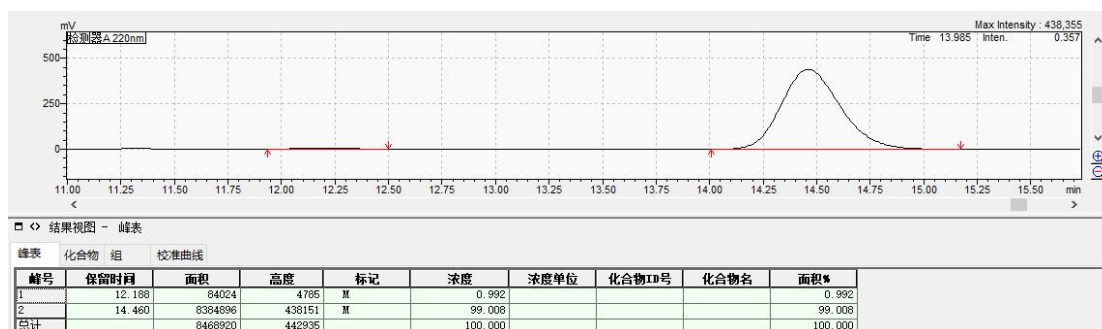

Annotation: Peak number (  ), Retention Time (min) (  ), Area (mV\*min) (  ), Height (mV) (  ), Labeled peak (  ), Concentration (  ) and Relative Area (%) (  ).

### (R)-6-bromo-2-(4-(trifluoromethyl)phenyl)chroman-4-one (39)

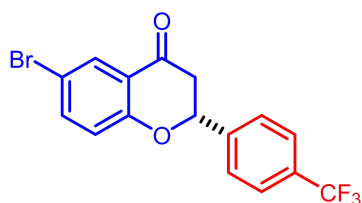

Yellow solid (44% isolated yield, 32.5 mg, 0.2 mmol), mp: 117.8 - 118.2 °C, column chromatography purification using petroleum ether/EtOAc (10:1, v/v) as eluents.

The NMR data and HRMS data are in accordance with that of previous publications (*J Agric Food Chem.* **2022**, *70*, 3409-3419. )

<sup>1</sup>H NMR (500 MHz, CDCl<sub>3</sub>) δ 8.04 (d, *J* = 2.7 Hz, 1H), 7.71 (d, *J* = 8.1 Hz, 2H), 7.62 - 7.59 (m, 3H), 6.98 (d, *J* = 9.0 Hz, 1H), 5.55 (dd, *J*<sub>1</sub> = 12.9, *J*<sub>2</sub> = 3.2 Hz, 1H), 3.04 (dd, *J*<sub>1</sub> = 16.9, *J*<sub>2</sub> = 12.9 Hz, 1H), 2.96 - 2.92 (m, 1H).

<sup>13</sup>C NMR (126 MHz, CDCl<sub>3</sub>) δ 190.1, 160.2, 142.3, 139.2, 131.1 (t, *J* = 33.1 Hz), 129.8, 126.5, 126.1 (q, *J* = 3.7 Hz), 124.0 (d, *J* = 271.9 Hz), 122.3, 120.3, 114.9, 79.1, 44.4.

[α]<sub>D</sub><sup>12</sup> = +65° (*c* 0.1, CHCl<sub>3</sub>).

HRMS (ESI) [M+H]<sup>+</sup> calcd for C<sub>16</sub>H<sub>11</sub>O<sub>2</sub>F<sub>3</sub>: 370.9889, found: 370.9888.

HPLC Conditions: 10% IPA/ Hexanes, 0.9 mL/min, Daicel Chiralpak OD-H column, λ = 220 nm, t<sub>R</sub> (min): minor = 10.2 min, major = 13.5 min. ee = 93%.

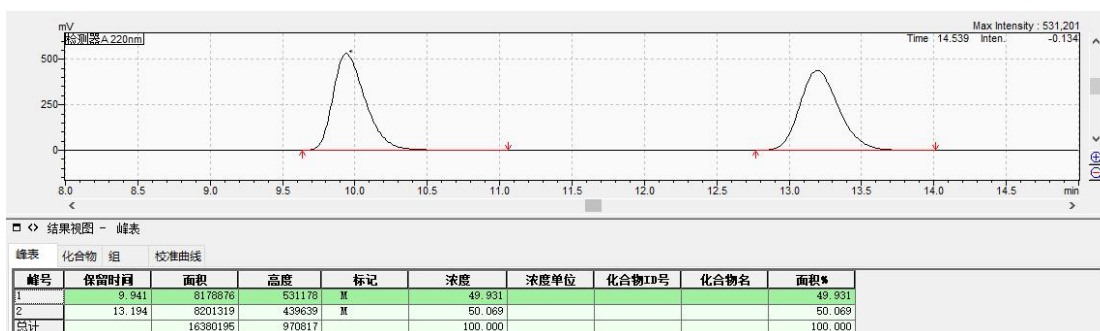

NL11:

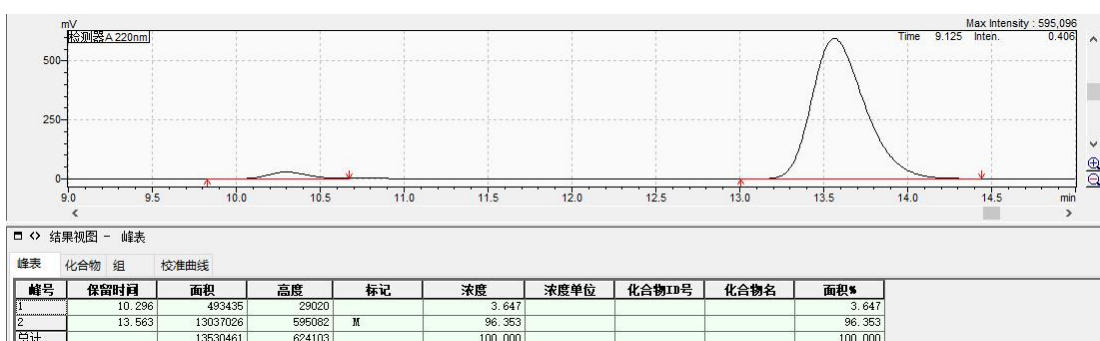

L5:

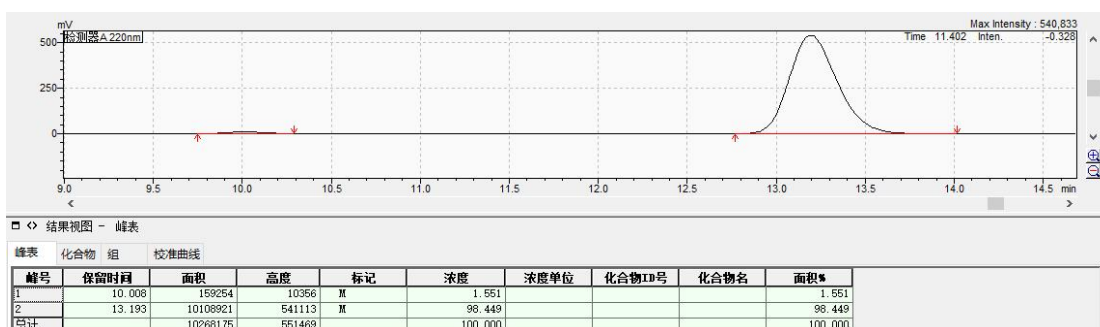

Annotation: Peak number (峰号), Retention Time (min) (保留时间), Area (mV\*min) (面积), Height (mV) (高度), Labeled peak (标记), Concentration (浓度) and Relative Area (%). (面积%).

**(R)-6-bromo-2-(p-tolyl)chroman-4-one (40)**

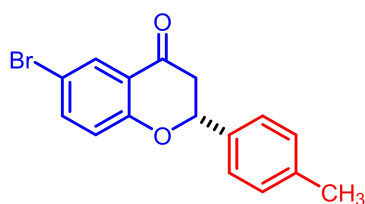

Yellow solid (64% isolated yield, 40.4 mg, 0.2 mmol), mp: 99.1 - 103.0 °C, column

chromatography purification using petroleum ether/EtOAc (10:1, v/v) as eluents.

The NMR data and HRMS data are in accordance with that of previous publications (*J Agric Food Chem.* **2022**, *70*, 3409-3419. )

$^1\text{H}$  NMR (500 MHz,  $\text{CDCl}_3$ )  $\delta$  8.02 - 8.01 (m, 1H), 7.57 - 7.54 (m, 1H), 7.34 (d,  $J = 7.6$  Hz, 2H), 7.23 (d,  $J = 7.8$  Hz, 2H), 6.93 (d,  $J = 8.9$  Hz, 1H), 5.42 (dd,  $J_1 = 13.0$ ,  $J_2 = 2.7$  Hz, 1H), 3.07 (dd,  $J_1 = 17.0$ ,  $J_2 = 13.2$  Hz, 1H), 2.87 (dd,  $J_1 = 17.2$ ,  $J_2 = 3.0$  Hz, 1H), 2.37 (s, 1H).

$^{13}\text{C}$  NMR (126 MHz,  $\text{CDCl}_3$ )  $\delta$  191.0, 160.6, 139.1, 138.9, 135.3, 129.7, 129.6, 126.3, 122.3, 120.4, 114.4, 79.8, 44.2, 21.3.

$[\alpha]_{\text{D}}^{25} = +41^\circ$  ( $c$  0.1,  $\text{CHCl}_3$ ).

HRMS (ESI)  $[\text{M}+\text{H}]^+$  calcd for  $\text{C}_{16}\text{H}_{14}\text{O}_2\text{Br}$ : 317.0172, found: 317.0171.

HPLC Conditions: 10% IPA/ Hexanes, 0.9 mL/min, Daicel Chiralpak OD-H column,  $\lambda = 220$  nm,  $t_{\text{R}}$  (min): minor = 9.7 min, major = 12.2 min. ee = 97%.

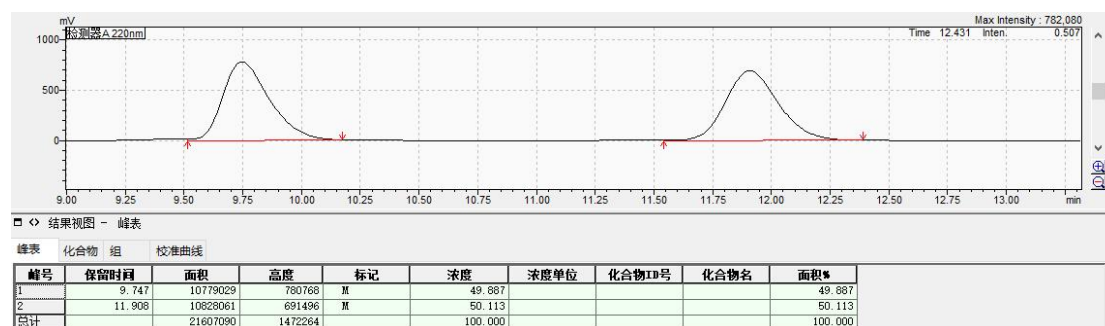

NL11:

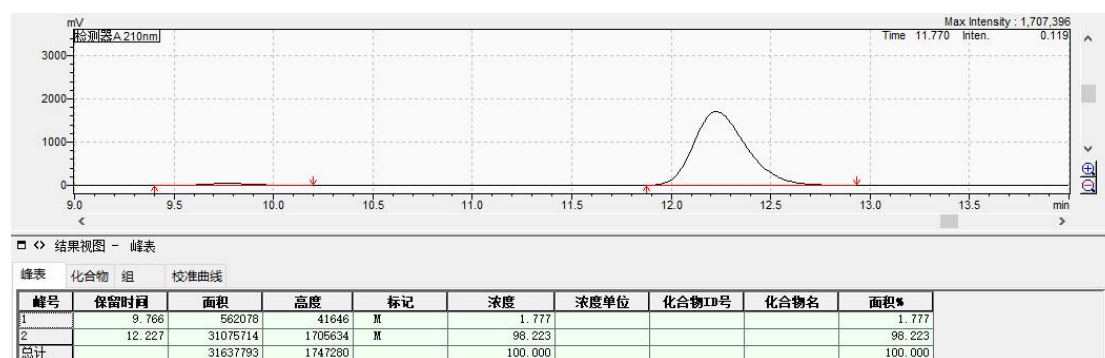

L5:

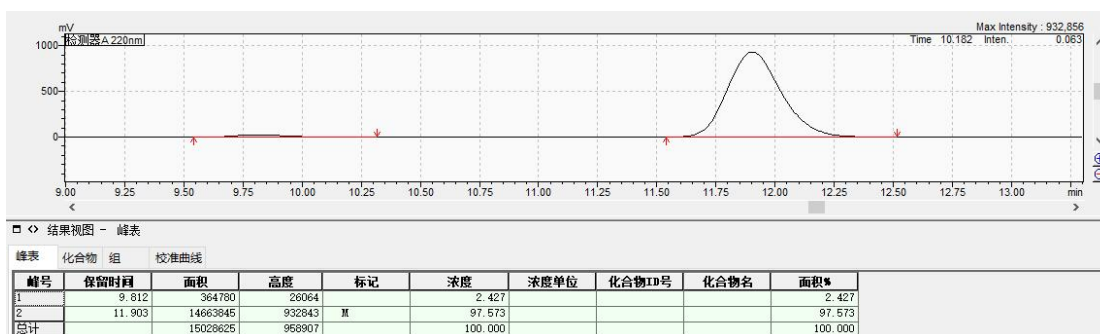

Annotation: Peak number (  ), Retention Time (min) (  ), Area (mV\*min) (  ), Height (mV) (  ), Labeled peak (  ), Concentration (  ) and Relative Area (%) (  ).

### (*R*)-2-(4-chlorophenyl)-7-fluorochroman-4-one (41)

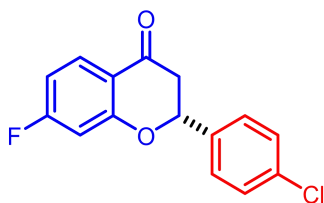

Yellow solid (45% isolated yield, 24.8 mg, 0.2 mmol), mp: 86.8 °C, column chromatography purification using petroleum ether/EtOAc (10:1, v/v) as eluents.

The NMR data and HRMS data are in accordance with that of previous publications (*J Agric Food Chem.* **2022**, *70*, 3409-3419. )

<sup>1</sup>H NMR (500 MHz, CDCl<sub>3</sub>) δ 7.94 (dd, *J*<sub>1</sub> = 8.8, *J*<sub>2</sub> = 6.7 Hz, 1H), 7.44 - 7.38 (m, 4H), 6.80 - 6.72 (m, 2H), 5.48 (dd, *J*<sub>1</sub> = 13.2, *J*<sub>2</sub> = 2.9 Hz, 1H), 3.02 (dd, *J*<sub>1</sub> = 17.0, *J*<sub>2</sub> = 13.1 Hz, 1H), 2.87 (dd, *J*<sub>1</sub> = 17.1, *J*<sub>2</sub> = 2.9 Hz, 1H).

<sup>13</sup>C NMR (126 MHz, CDCl<sub>3</sub>) δ 190.2, 167.7 (d, *J* = 256.9 Hz), 163.0 (d, *J* = 13.4 Hz), 136.9, 134.9, 129.7 (d, *J* = 11.5 Hz), 129.2, 127.6, 117.9, 110.4 (d, *J* = 22.8 Hz), 105.1 (d, *J* = 25.0 Hz), 79.5, 44.3.

[α]<sub>D</sub><sup>11</sup> = +35° (c 0.1, CHCl<sub>3</sub>).

HRMS (ESI) [M+H]<sup>+</sup> calcd for C<sub>15</sub>H<sub>11</sub>O<sub>2</sub>FCl: 277.0426, found: 277.0424.

HPLC Conditions: 10% IPA/ Hexanes, 0.9 mL/min, Daicel Chiralpak OD-H column, λ = 220 nm, t<sub>R</sub> (min): minor = 10.0 min, major = 12.5 min. ee = 95%.



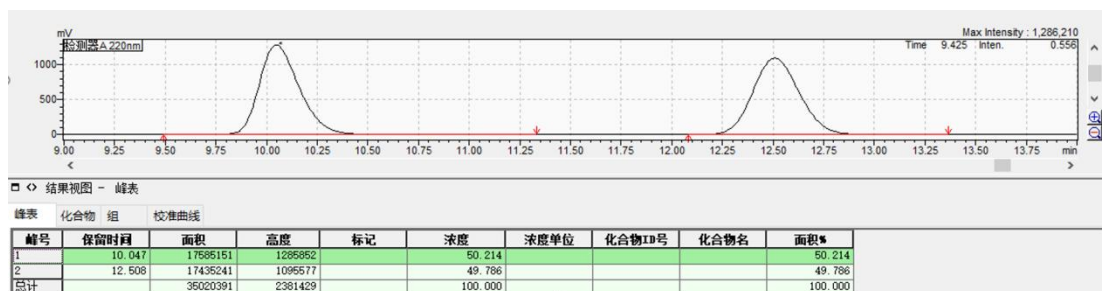

NL11:

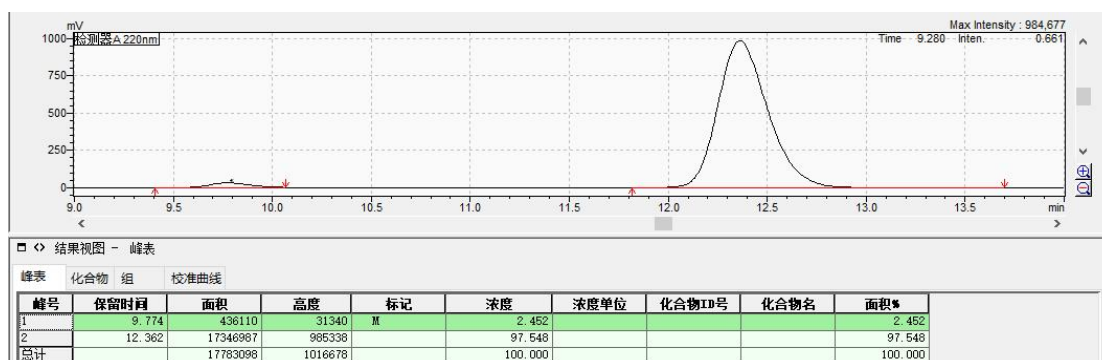

L5:

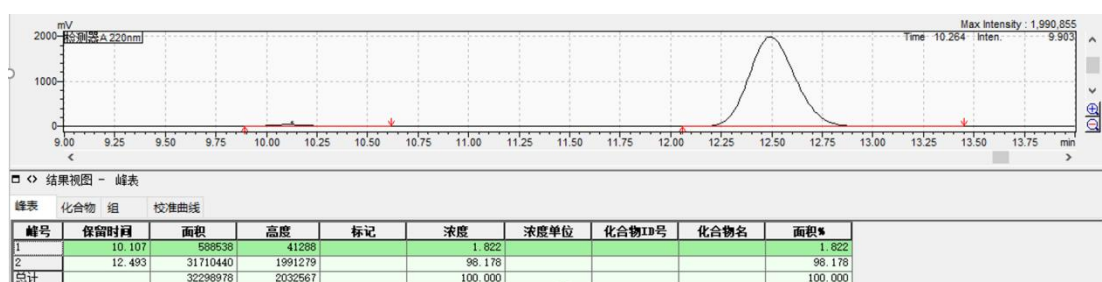

Annotation: Peak number (峰号), Retention Time (min) (保留时间), Area (mV\*min) (面积), Height (mV) (高度), Labeled peak (标记), Concentration (浓度) and Relative Area (%) (面积%).

(R)-7-fluoro-2-(4-(trifluoromethyl)phenyl)chroman-4-one (42)

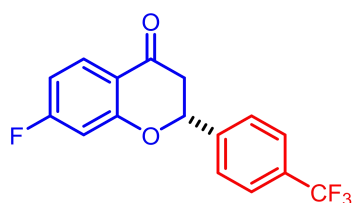

Yellow solid (50% isolated yield, 31.0 mg, 0.2 mmol), mp: 128.5 – 131.4 °C, column chromatography purification using petroleum ether/EtOAc (10:1, v/v) as eluents.



$^1\text{H}$  NMR (400 MHz,  $\text{CDCl}_3$ )  $\delta$  7.95 (dd,  $J_1 = 8.8$ ,  $J_2 = 6.6$  Hz, 1H), 7.45 (dd,  $J_1 = 8.7$ ,  $J_2 = 5.2$  Hz, 2H), 7.13 (t,  $J = 8.6$  Hz, 2H), 6.81 – 6.72 (m, 2H), 5.48 (dd,  $J_1 = 13.1$ ,  $J_2 = 3.0$  Hz, 1H), 3.05 (dd,  $J_1 = 16.9$ ,  $J_2 = 13.1$  Hz, 1H), 2.87 (dd,  $J_1 = 16.9$ ,  $J_2 = 3.0$  Hz, 1H).

$^{13}\text{C}$  NMR (101 MHz,  $\text{CDCl}_3$ )  $\delta$  190.4, 169.0, 166.5, 163.1 (d,  $J = 13.5$  Hz), 163.0 (d,  $J = 248.1$  Hz), 134.3 (d,  $J = 3.3$  Hz), 129.8 (d,  $J = 11.4$  Hz), 128.2 (d,  $J = 8.3$  Hz), 118.0 (d,  $J = 2.5$  Hz), 116.0 (d,  $J = 21.6$  Hz), 110.4 (d,  $J = 22.6$  Hz), 105.0 (d,  $J = 24.5$  Hz), 79.6, 44.4.

$[\alpha]_{\text{D}}^{20} = +49^\circ$  ( $c$  0.1,  $\text{CHCl}_3$ ).

HRMS (ESI)  $[\text{M}+\text{H}]^+$  calcd for  $\text{C}_{16}\text{H}_{12}\text{F}_4\text{O}_2$ : 311.0690, found: 311.0693.

HPLC Conditions: 10% IPA/ Hexanes, 0.9 mL/min, Daicel Chiralpak OD-H column,  $\lambda = 220$  nm,  $t_{\text{R}}$  (min): minor=8.6 min, major=9.9 min. ee = 93%.

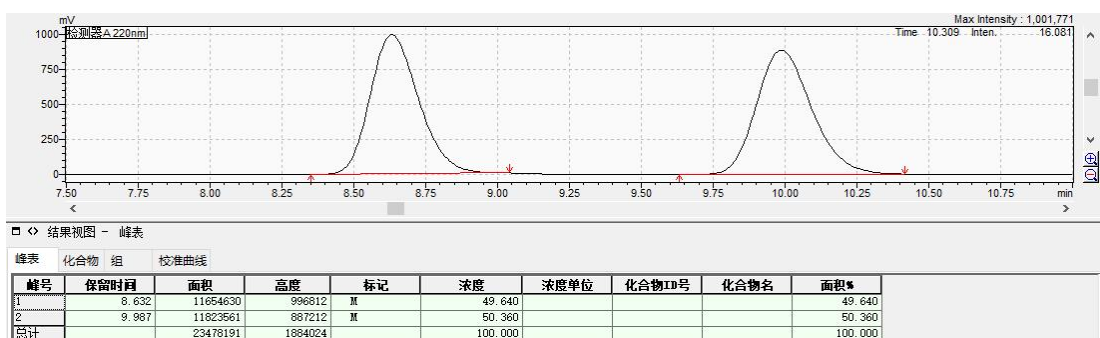

NL11:

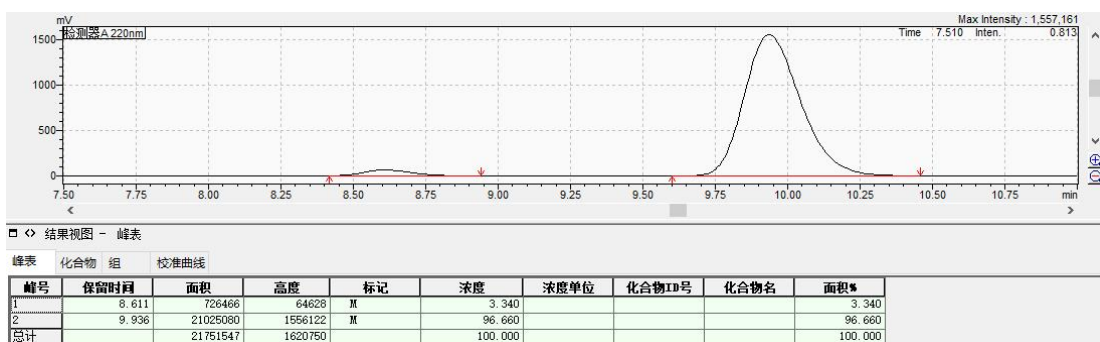

L5:

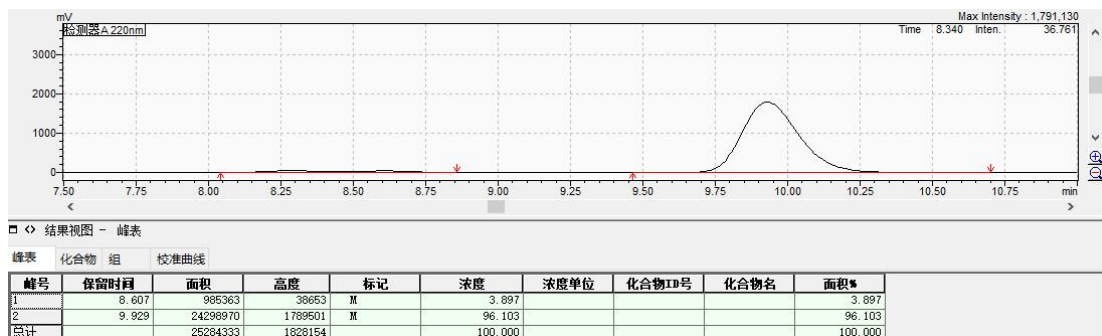

Annotation: Peak number (  ), Retention Time (min) (  ), Area (mV\*min) (  ), Height (mV) (  ), Labeled peak (  ), Concentration (  ) and Relative Area (%) (  ).

### (R)-7-fluoro-2-phenylchroman-4-one (43)

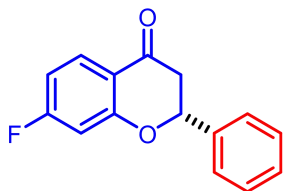

Yellow oil (76% isolated yield, 36.8 mg, 0.2 mmol), column chromatography purification using petroleum ether/EtOAc (10:1, v/v) as eluents.

The NMR data and HRMS data are in accordance with that of previous publications (*J Agric Food Chem.* **2022**, *70*, 3409-3419. )

$^1\text{H}$  NMR (500 MHz,  $\text{CDCl}_3$ )  $\delta$  7.97 - 7.94 (m, 1H), 7.48 - 7.40 (m, 5H), 6.80 - 6.73 (m, 2H), 5.50 (dd,  $J_1 = 13.3$ ,  $J_2 = 3.0$  Hz, 1H), 3.11 - 3.05 (m, 1H), 2.89 (dd,  $J_1 = 16.9$ ,  $J_2 = 3.1$  Hz, 1H).

$^{13}\text{C}$  NMR (126 MHz,  $\text{CDCl}_3$ )  $\delta$  190.7, 167.7 (d,  $J = 256.0$  Hz), 163.4, 163.3, 138.4, 129.7 (d,  $J = 11.8$  Hz), 129.1 (d,  $J = 5.8$  Hz), 126.3, 118.0, 110.2 (d,  $J = 22.9$  Hz), 105.1 (d,  $J = 24.3$  Hz), 80.3, 44.4.

$[\alpha]_{\text{D}}^{10} = +41^\circ$  (c 0.1,  $\text{CHCl}_3$ ).

HRMS (ESI)  $[\text{M}+\text{H}]^+$  calcd for  $\text{C}_{15}\text{H}_{12}\text{O}_2\text{F}$ : 243.0816, found: 243.0818.

HPLC Conditions: 10% IPA/ Hexanes, 0.9 mL/min, Daicel Chiralpak OD-H column,  $\lambda = 220$  nm,  $t_{\text{R}}$  (min): minor = 9.1 min, major = 12.1 min. ee = 95%.

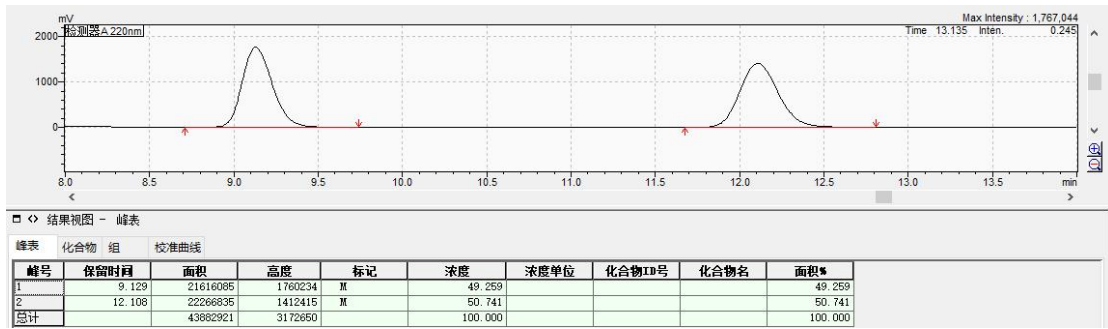

NL11:

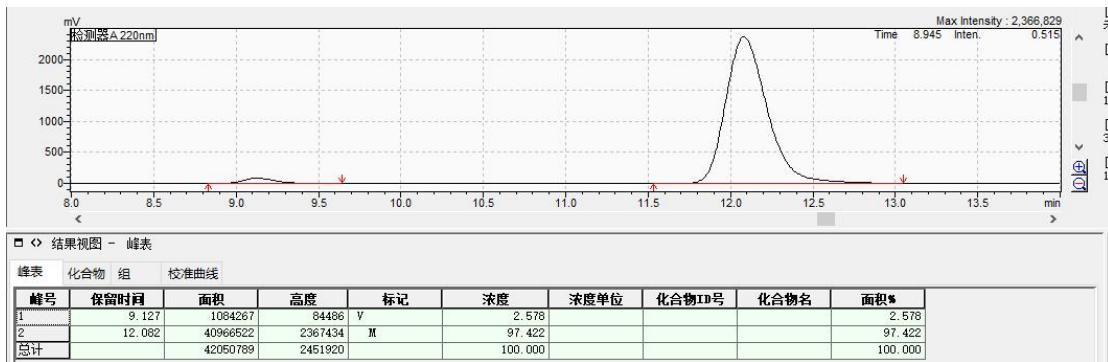

L5:

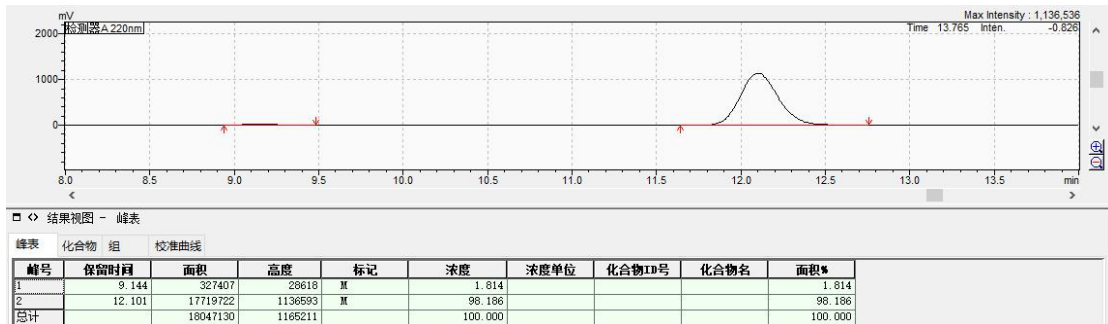

Annotation: Peak number (峰号), Retention Time (min) (保留时间), Area (mV\*min) (面积), Height (mV) (高度), Labeled peak (标记), Concentration (浓度) and Relative Area (%) (面积%).

## 6. Density functional theory (DFT) of NL11

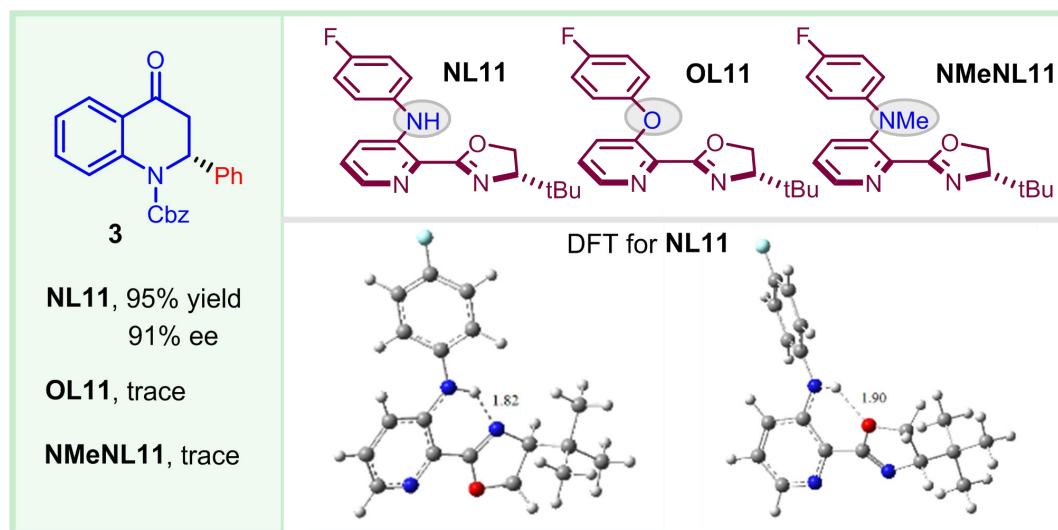

**Figure 1** Control Experiments, X-ray, and DFT for Ligand NL11

Consistent with our previous observation, these modifications were detrimental, showing the indispensability of the NH segment for the current transformation. This may be due to the flexibility from the ring-opening of the carboline ring. The presence of NH-functionality could counterbalance this by forming an intramolecular H-bonding with oxazoline to further rigidify the ligand structure for improving catalytic performance. Density functional theory (DFT) calculation (Gaussian 16 software at the B3LYP-D3 level.) was carried out to show the potential hydrogen bonding between NH and oxazoline segment (**Figure 3**). The appended aromatic unit of **NHPyOx** may also possess a  $\pi$ - $\pi$  stacking interaction with the substrates.

All calculations were performed using Gaussian 16 software with the density functional theory (DFT). Structure optimization was carried out at the B3LYP-D3 level of theory with the 6-311G(d,p) basis set for C, N, O, F and H. The vibrational frequencies were also computed at the same level.

-----  
# 1 NL11\_1\_opt  
G = -1037.325473

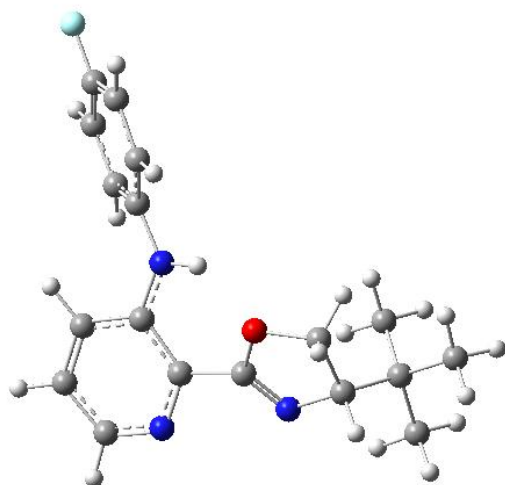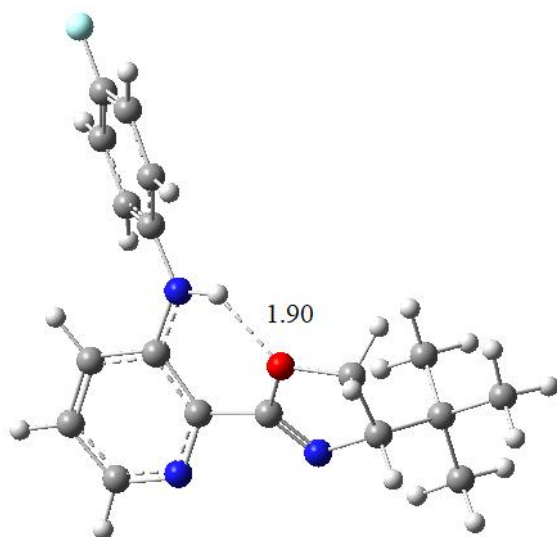

|   |             |             |             |
|---|-------------|-------------|-------------|
| C | -1.10890000 | 3.77969800  | 0.23881700  |
| C | 0.27546000  | 3.95716600  | 0.22330200  |
| N | 1.11418600  | 2.96566600  | -0.04556200 |
| C | 0.63141500  | 1.74358800  | -0.29337300 |
| C | -0.75961600 | 1.44831900  | -0.27850300 |
| C | -1.62648200 | 2.52421200  | -0.01583500 |
| C | 1.66458600  | 0.71692300  | -0.55977100 |
| O | 1.27575800  | -0.34997700 | -1.34982500 |
| C | 2.43617700  | -1.21166900 | -1.46701300 |
| C | 3.51865700  | -0.49830100 | -0.61419300 |
| N | 2.85732200  | 0.72331200  | -0.13489700 |
| N | -1.23444300 | 0.17474300  | -0.52691200 |
| H | -0.58703200 | -0.44294500 | -0.99610800 |
| C | -2.50562800 | -0.33879900 | -0.23145300 |
| C | -3.07333600 | -1.27413100 | -1.10661000 |

|   |             |             |             |
|---|-------------|-------------|-------------|
| C | -4.30176700 | -1.86076800 | -0.82565900 |
| C | -4.97440400 | -1.48936500 | 0.32712500  |
| C | -4.44050500 | -0.56581100 | 1.21190500  |
| C | -3.20026300 | -0.00085800 | 0.93807200  |
| F | -6.17889000 | -2.04358300 | 0.59762300  |
| C | 4.09639700  | -1.32616600 | 0.56437000  |
| C | 5.14918500  | -0.46775000 | 1.28237700  |
| C | 4.76508000  | -2.59177400 | 0.00579500  |
| C | 2.98665100  | -1.70544300 | 1.55602500  |
| H | -1.76894100 | 4.61640500  | 0.43473000  |
| H | 0.71983800  | 4.92644700  | 0.42509100  |
| H | -2.69561600 | 2.36376800  | -0.03215600 |
| H | 2.69559000  | -1.28044300 | -2.52348900 |
| H | 2.15911600  | -2.19931700 | -1.09819800 |
| H | 4.36297100  | -0.20172200 | -1.24582900 |
| H | -2.54591400 | -1.53523500 | -2.01675600 |
| H | -4.74625000 | -2.58586800 | -1.49525700 |
| H | -4.98515400 | -0.31256800 | 2.11254000  |
| H | -2.76014400 | 0.68895300  | 1.64562400  |
| H | 5.57235700  | -1.01249600 | 2.13104400  |
| H | 4.70549400  | 0.46052900  | 1.64315000  |
| H | 5.96916200  | -0.20975400 | 0.60513500  |
| H | 5.23607600  | -3.15957800 | 0.81249400  |
| H | 4.04695800  | -3.25592300 | -0.48403200 |
| H | 5.54244700  | -2.33751200 | -0.72134200 |
| H | 2.20995200  | -2.32057000 | 1.09202900  |
| H | 3.40421000  | -2.28005700 | 2.38682400  |
| H | 2.51312500  | -0.81052800 | 1.96380900  |

---

# 2 NL11\_2\_opt  
G = -1037.335013

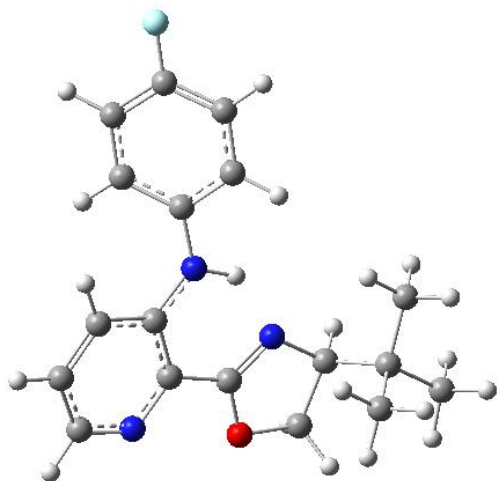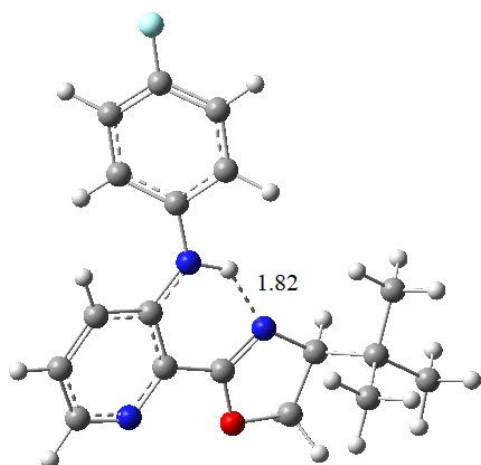

|   |             |             |             |
|---|-------------|-------------|-------------|
| C | 1.02677400  | 3.84073400  | 0.70828300  |
| C | -0.31138700 | 4.13105200  | 0.42624800  |
| N | -1.17426000 | 3.19580400  | 0.05714900  |
| C | -0.75479700 | 1.93190900  | -0.07781400 |
| C | 0.59787300  | 1.53324400  | 0.14560300  |
| C | 1.48192600  | 2.54445400  | 0.57140000  |
| C | -1.78324400 | 0.94764500  | -0.44104100 |
| O | -3.03546700 | 1.41042700  | -0.64880000 |
| C | -3.83164100 | 0.26349400  | -1.03412500 |
| C | -2.88553600 | -0.94963500 | -0.84476800 |
| N | -1.59113600 | -0.31729200 | -0.55626700 |
| N | 0.97510300  | 0.22519400  | -0.00685800 |
| H | 0.19371500  | -0.40992900 | -0.19535200 |
| C | 2.27603600  | -0.30221600 | -0.03626500 |
| C | 2.49333000  | -1.56441800 | 0.53161300  |
| C | 3.74492500  | -2.16589800 | 0.47664300  |

|   |             |             |             |
|---|-------------|-------------|-------------|
| C | 4.78803900  | -1.48738700 | -0.13316600 |
| C | 4.60568000  | -0.23876900 | -0.70566100 |
| C | 3.34506600  | 0.34710600  | -0.66765700 |
| F | 6.01337400  | -2.05988000 | -0.17494500 |
| C | -3.29056100 | -1.95395300 | 0.26865600  |
| C | -2.22444000 | -3.05840500 | 0.33932100  |
| C | -4.64320800 | -2.58301400 | -0.10002300 |
| C | -3.38557700 | -1.25135000 | 1.63079700  |
| H | 1.69810200  | 4.62378200  | 1.04093300  |
| H | -0.69591100 | 5.14220300  | 0.51170200  |
| H | 2.50629200  | 2.29504700  | 0.80965800  |
| H | -4.13864000 | 0.40259800  | -2.07185500 |
| H | -4.71575400 | 0.24743700  | -0.39838400 |
| H | -2.79889200 | -1.51775100 | -1.77659800 |
| H | 1.67029200  | -2.06881200 | 1.02367100  |
| H | 3.92186600  | -3.14143000 | 0.91108400  |
| H | 5.43891100  | 0.25276600  | -1.19152200 |
| H | 3.18552400  | 1.30050500  | -1.15304400 |
| H | -2.49260400 | -3.80043800 | 1.09640900  |
| H | -1.24969500 | -2.64083300 | 0.59609500  |
| H | -2.12922700 | -3.57525400 | -0.62042300 |
| H | -4.92503800 | -3.33786400 | 0.63866700  |
| H | -5.44597500 | -1.84134900 | -0.13152100 |
| H | -4.59612700 | -3.07294600 | -1.07746500 |
| H | -4.13493100 | -0.45542900 | 1.63262500  |
| H | -3.66655300 | -1.96886200 | 2.40613700  |
| H | -2.42546900 | -0.81144300 | 1.90765800  |

## 7. NMR spectra





20  
si

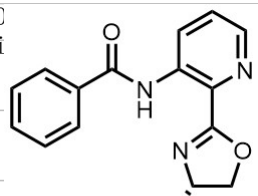

<sup>13</sup>CNMR of **CL5**  
CDCl<sub>3</sub>, 126 MHz

gate 0.00E

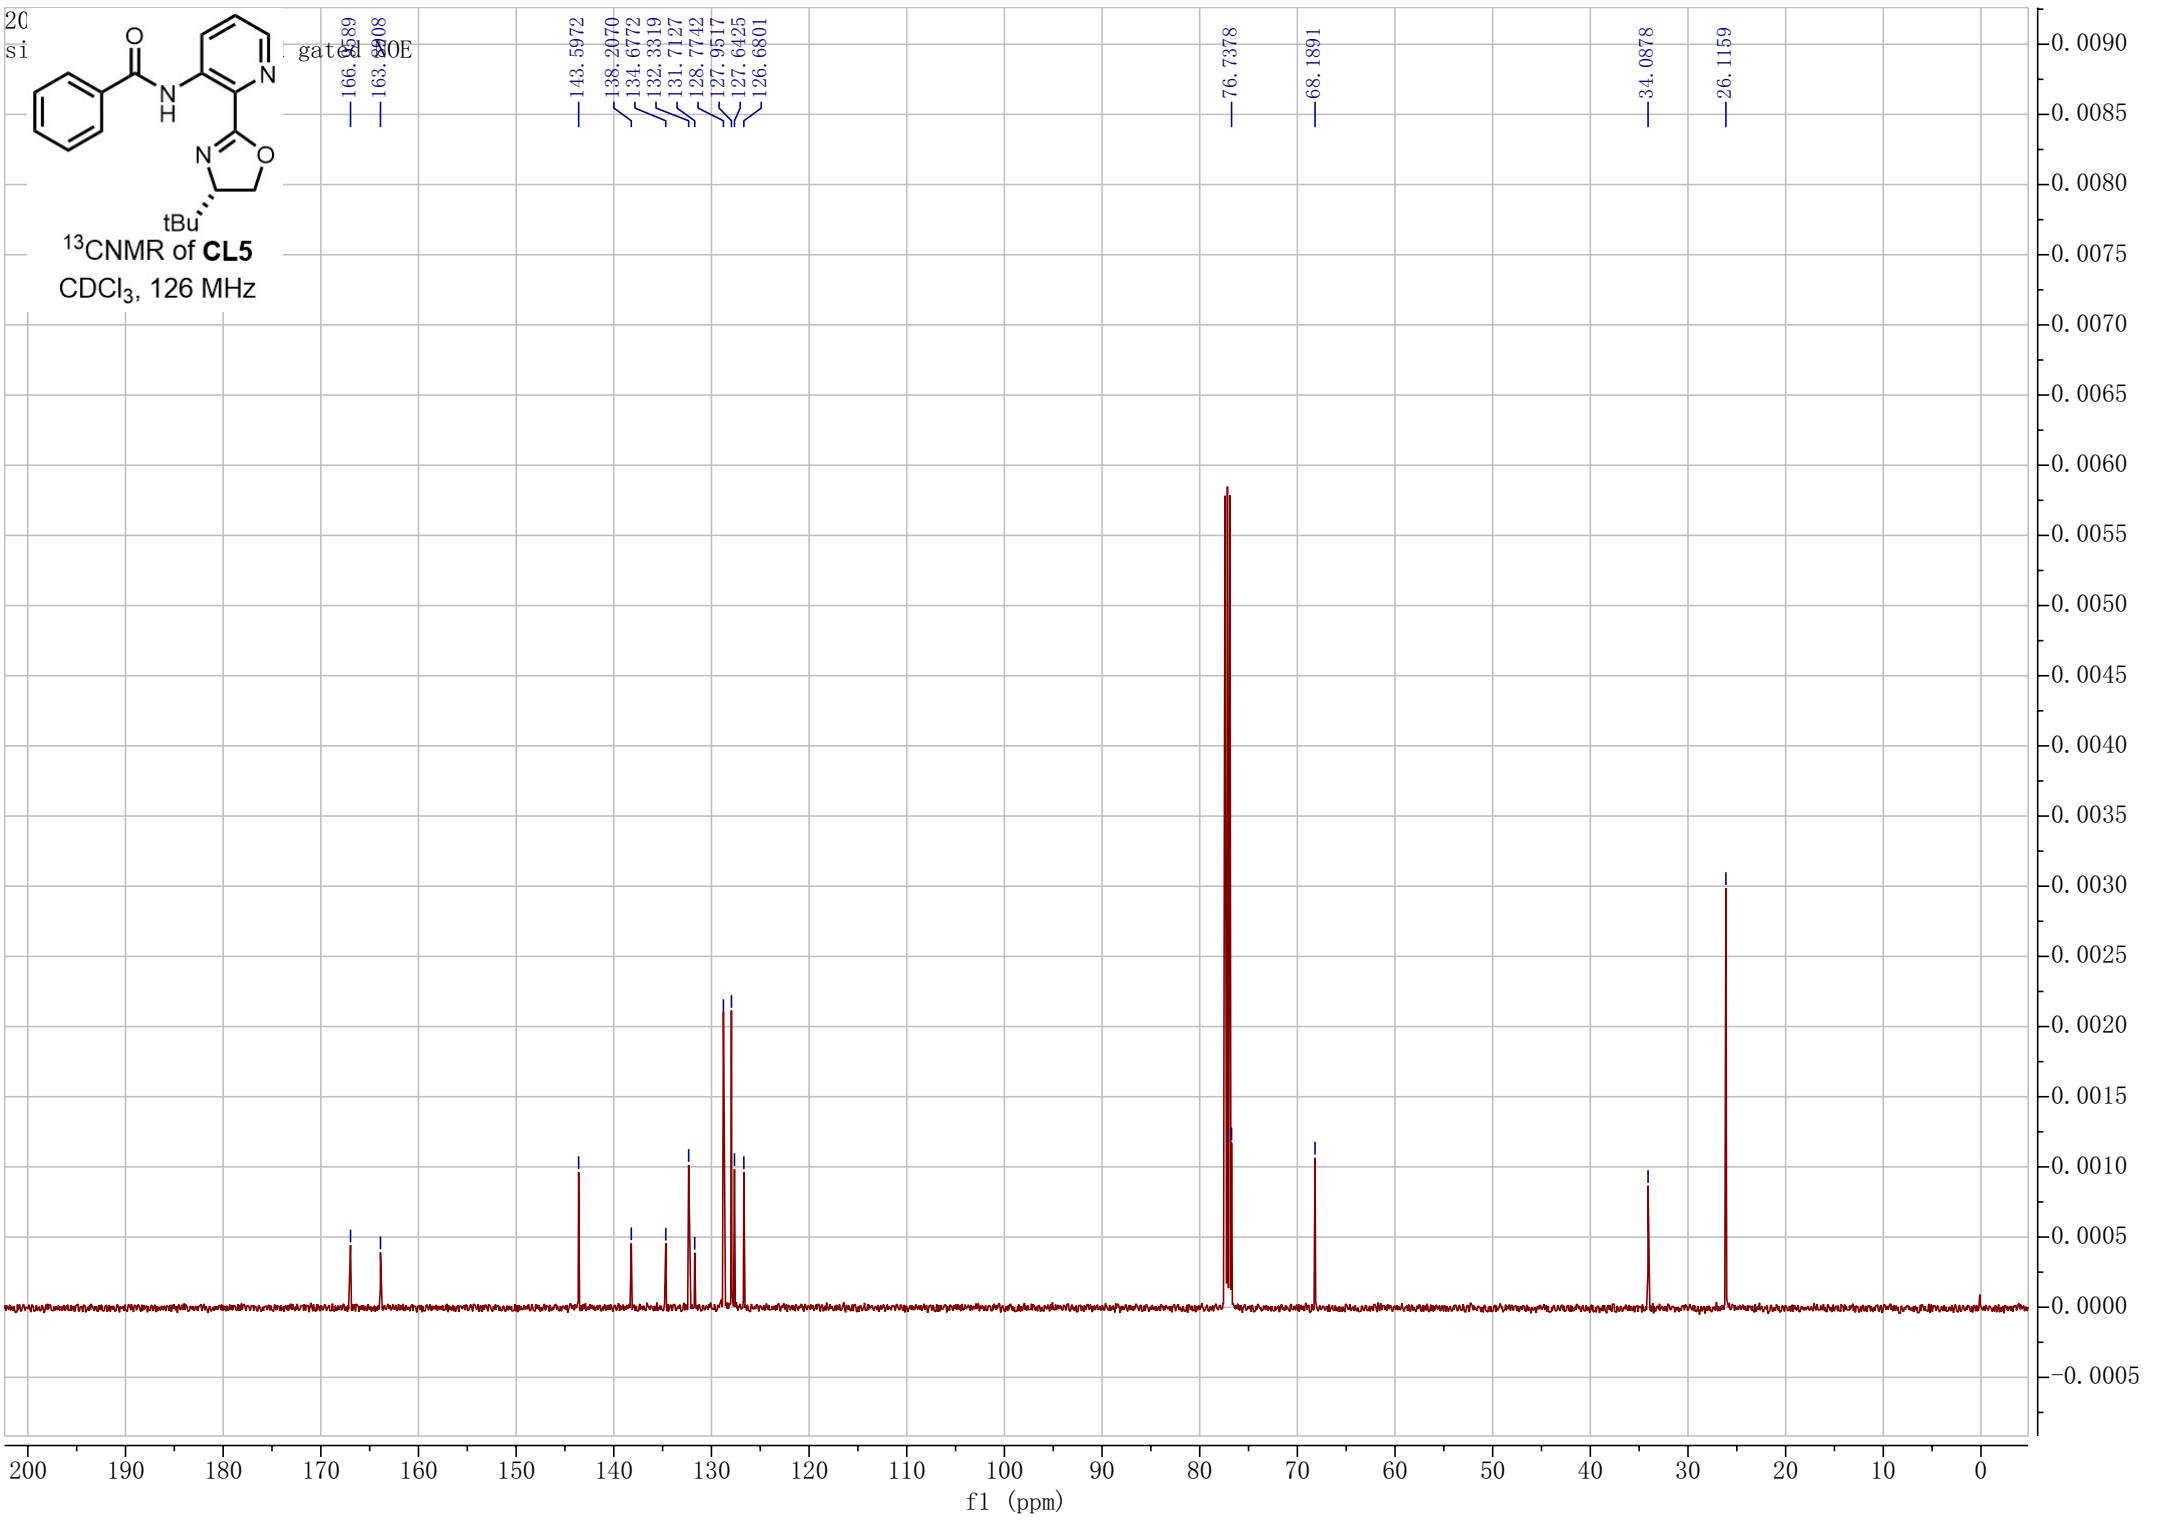

20220902-K327  
single\_pulse

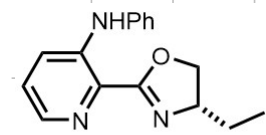

<sup>1</sup>H NMR of **NL1**  
CDCl<sub>3</sub>, 500 MHz

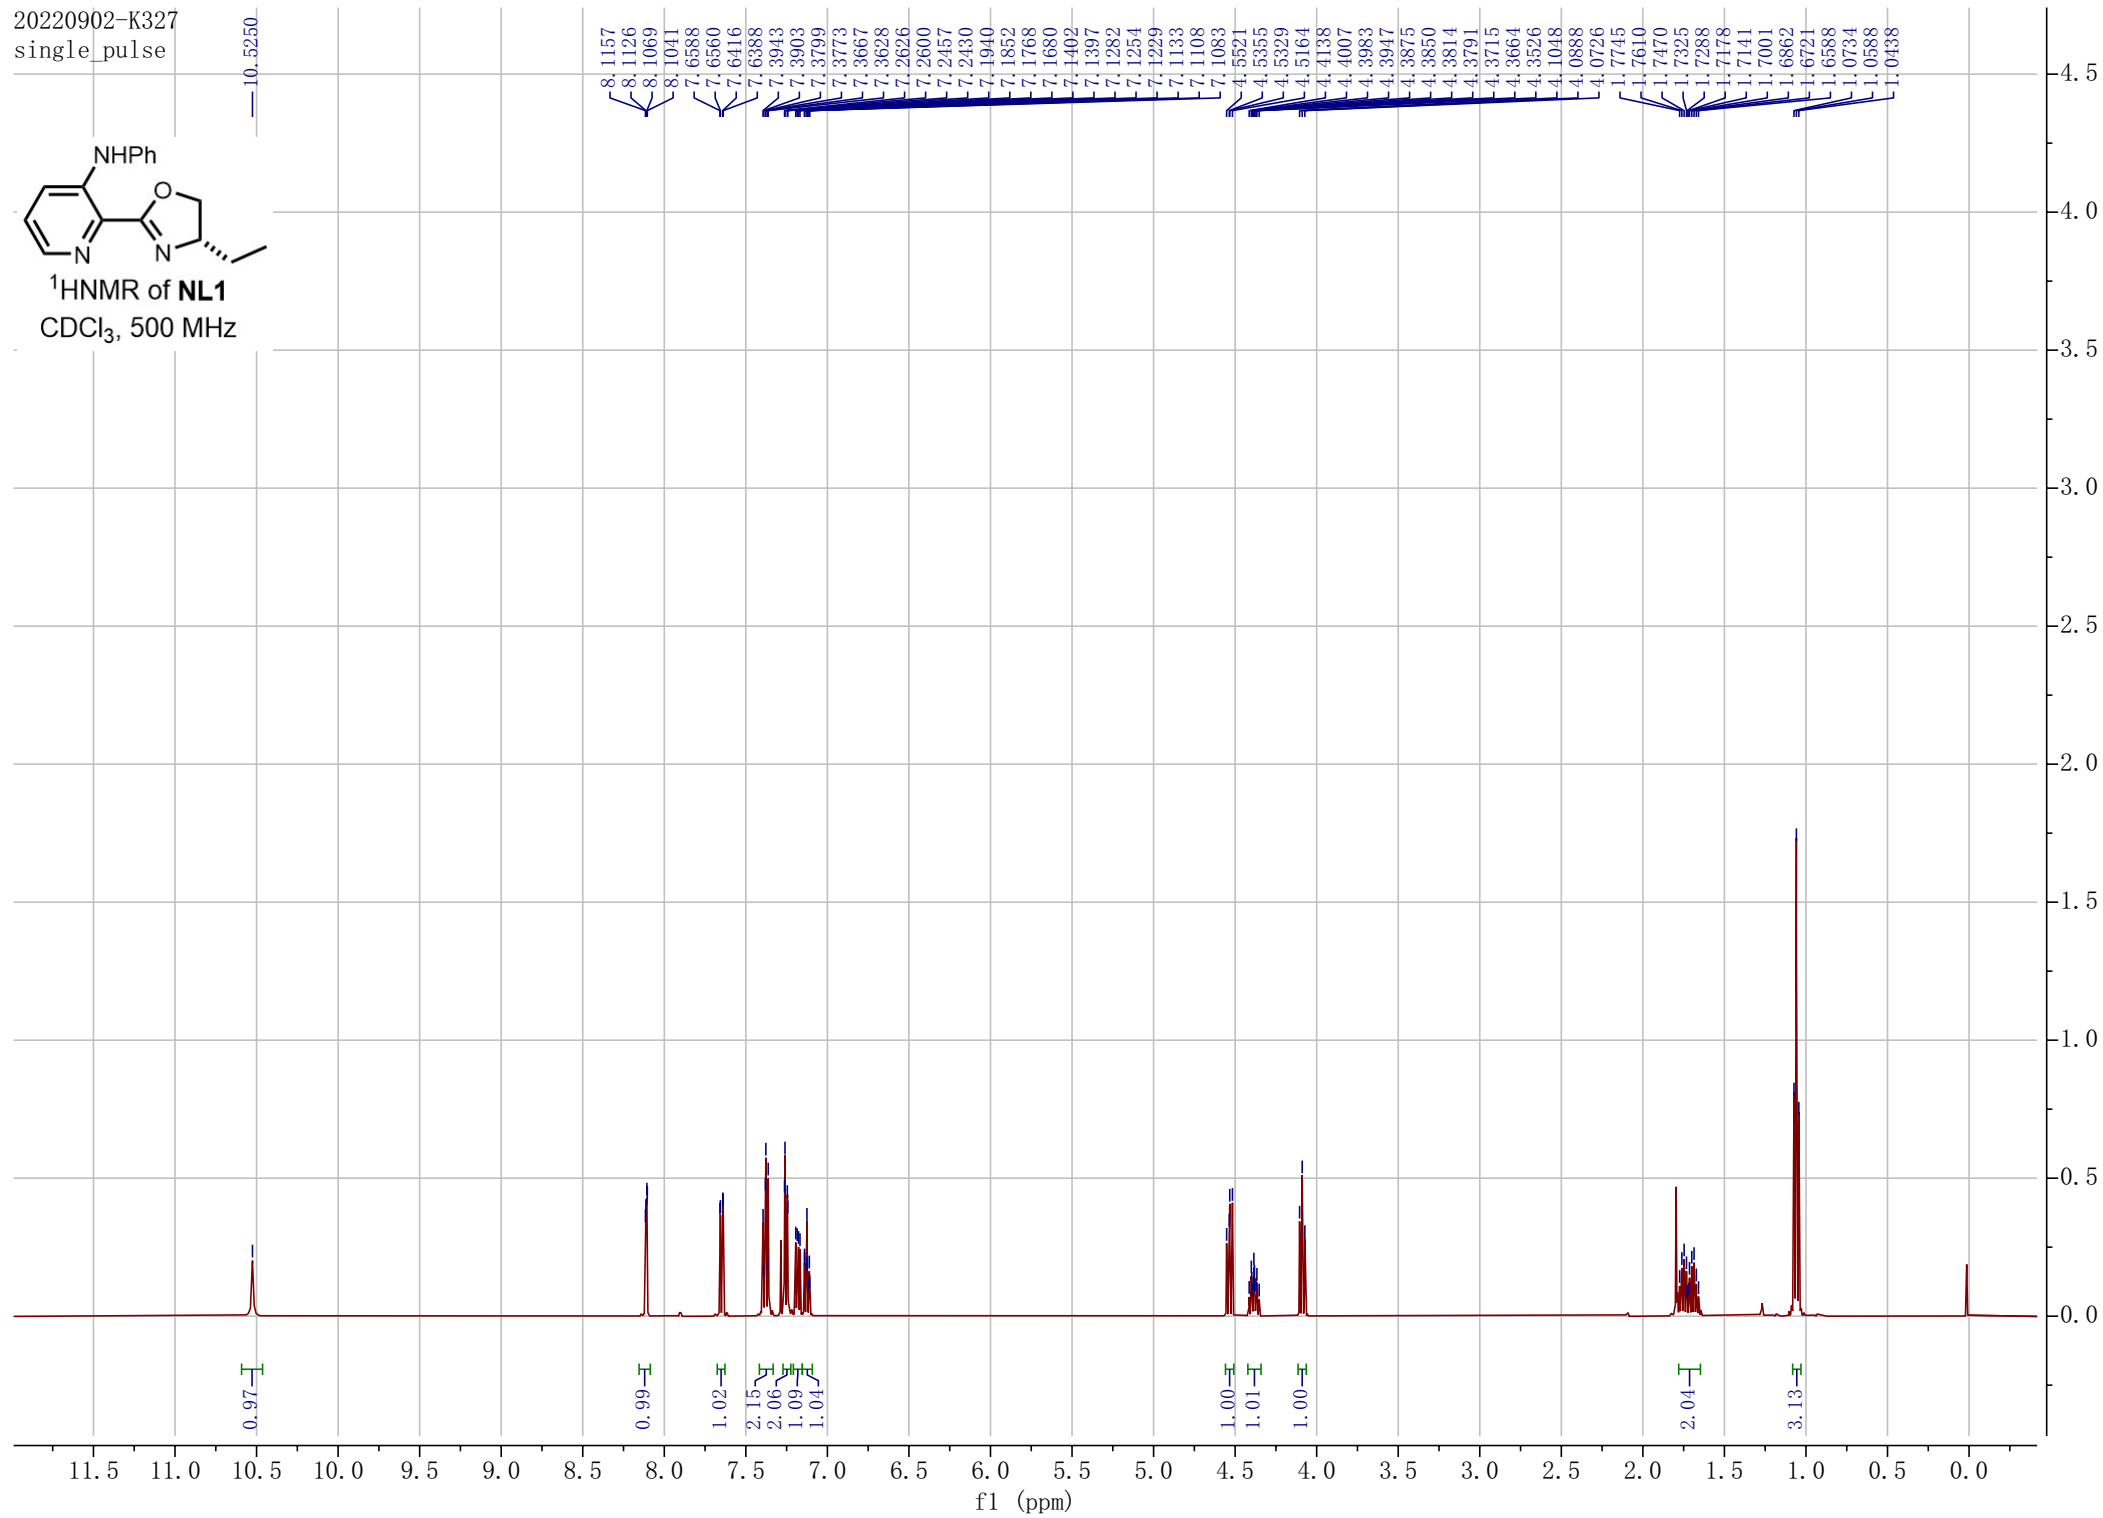

20220902-K327

single pulse decoupled gated NOE

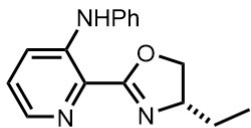

<sup>13</sup>CNMR of **NL1**

CDCl<sub>3</sub>, 126 MHz

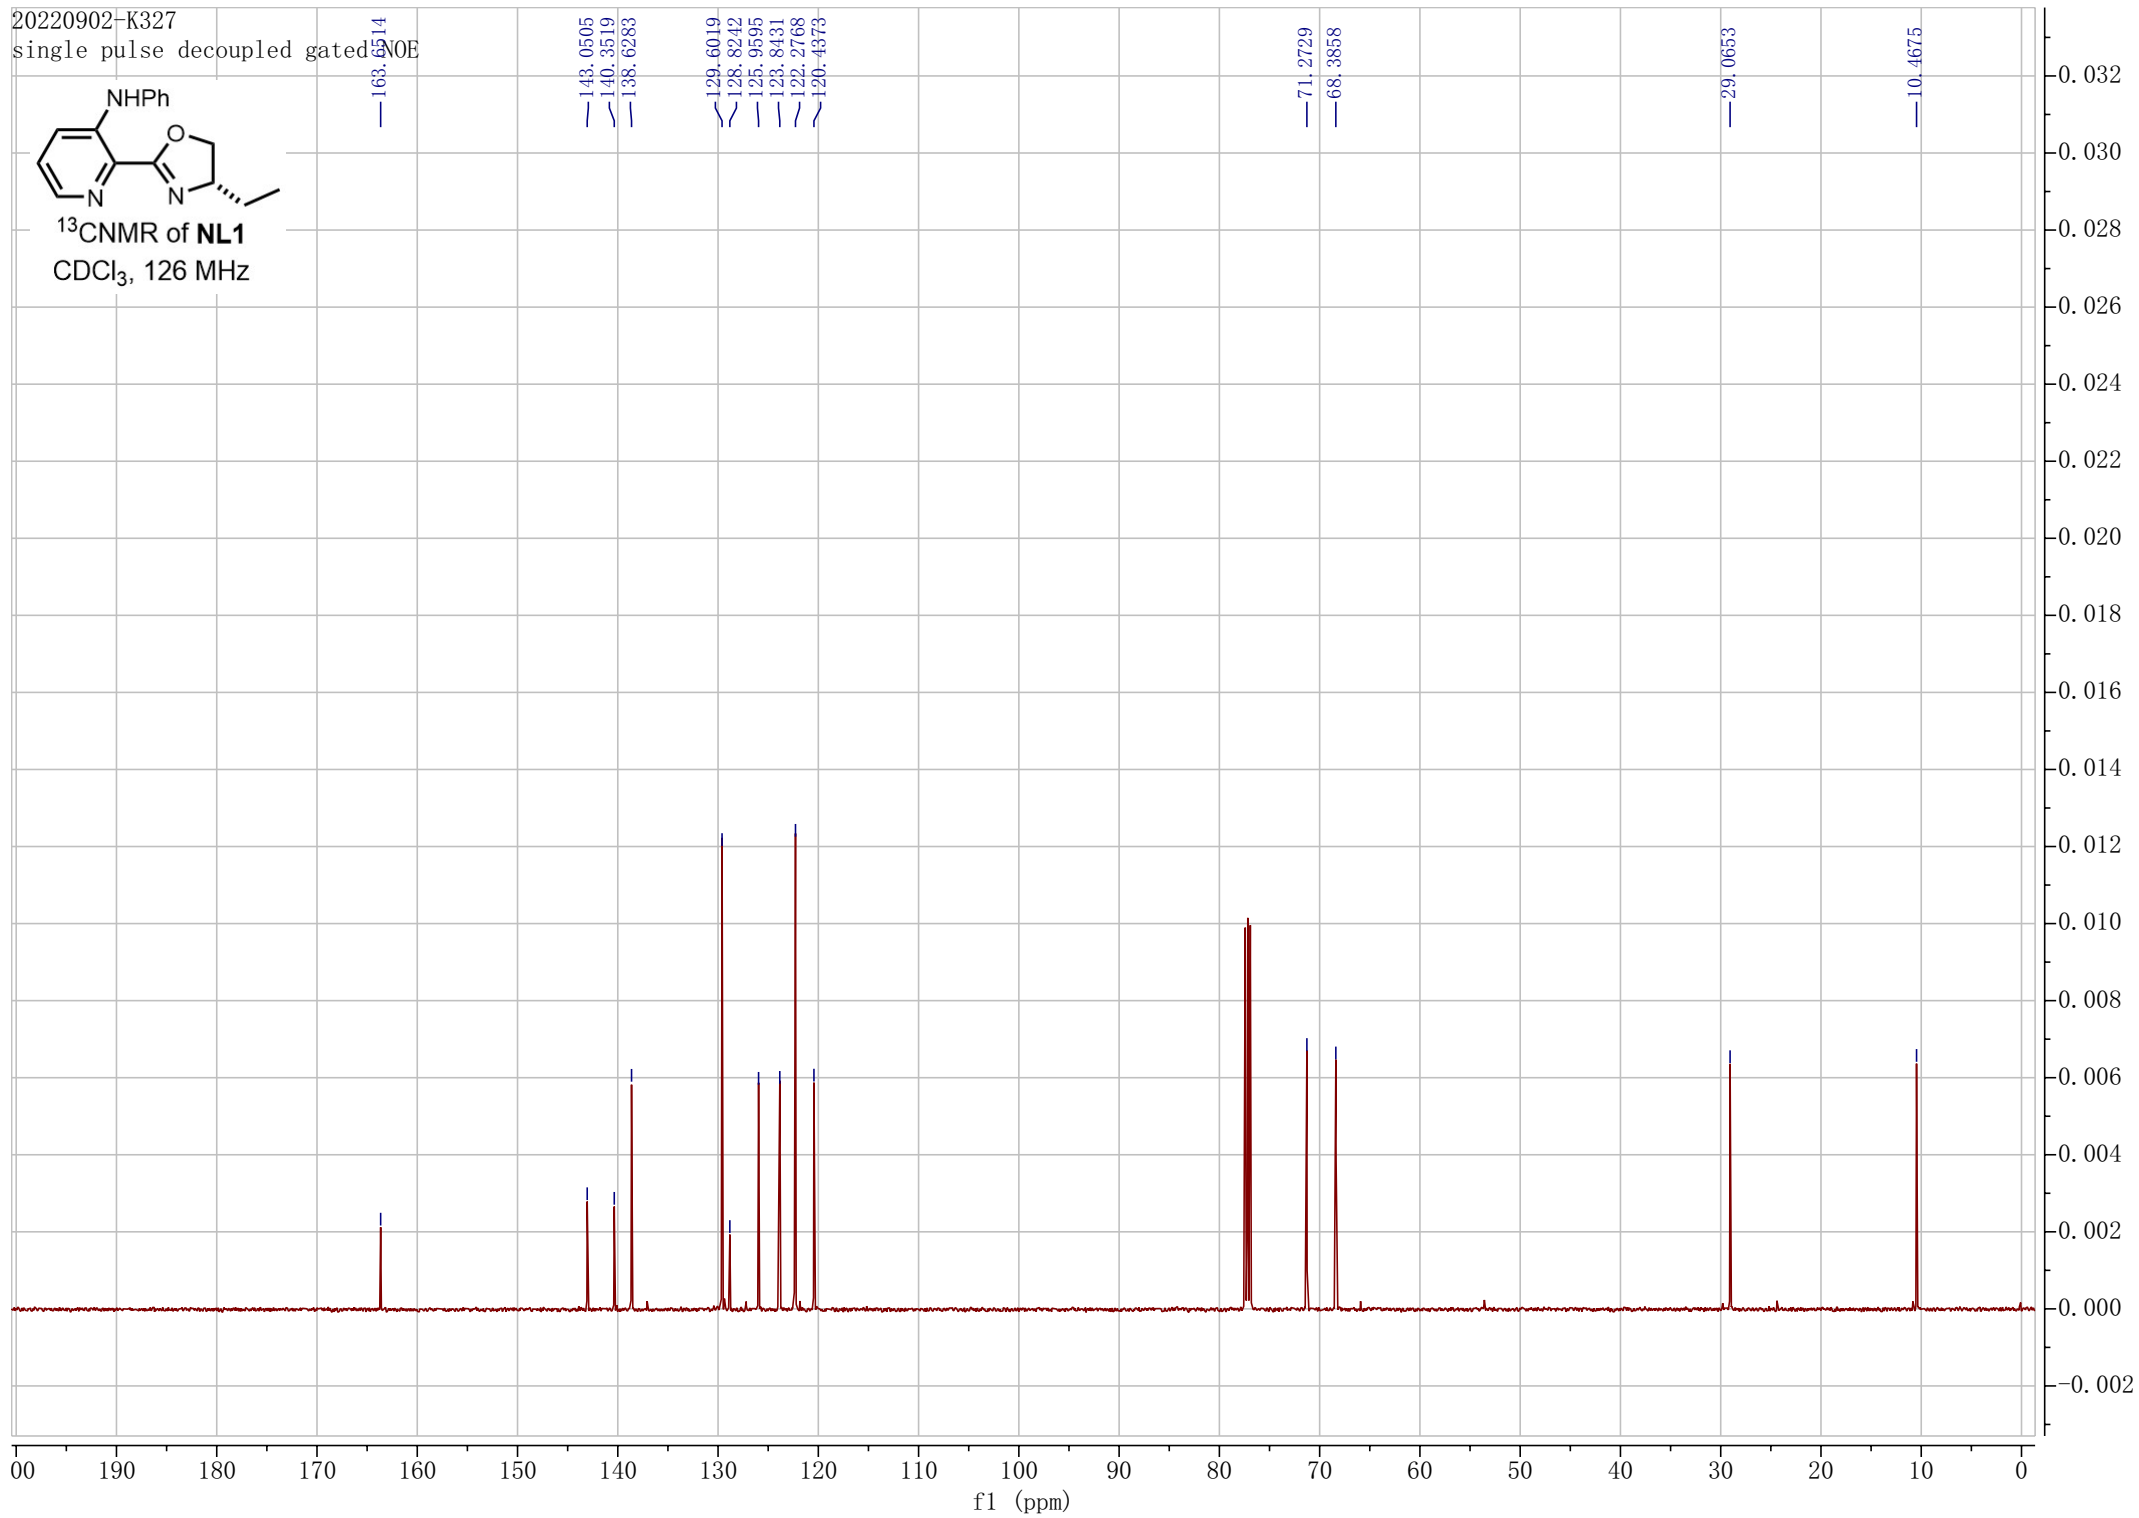

20220902-K328  
single\_pulse

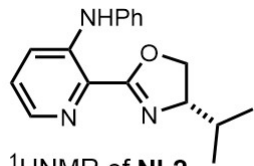

<sup>1</sup>HNMR of **NL2**  
CDCl<sub>3</sub>, 500 MHz

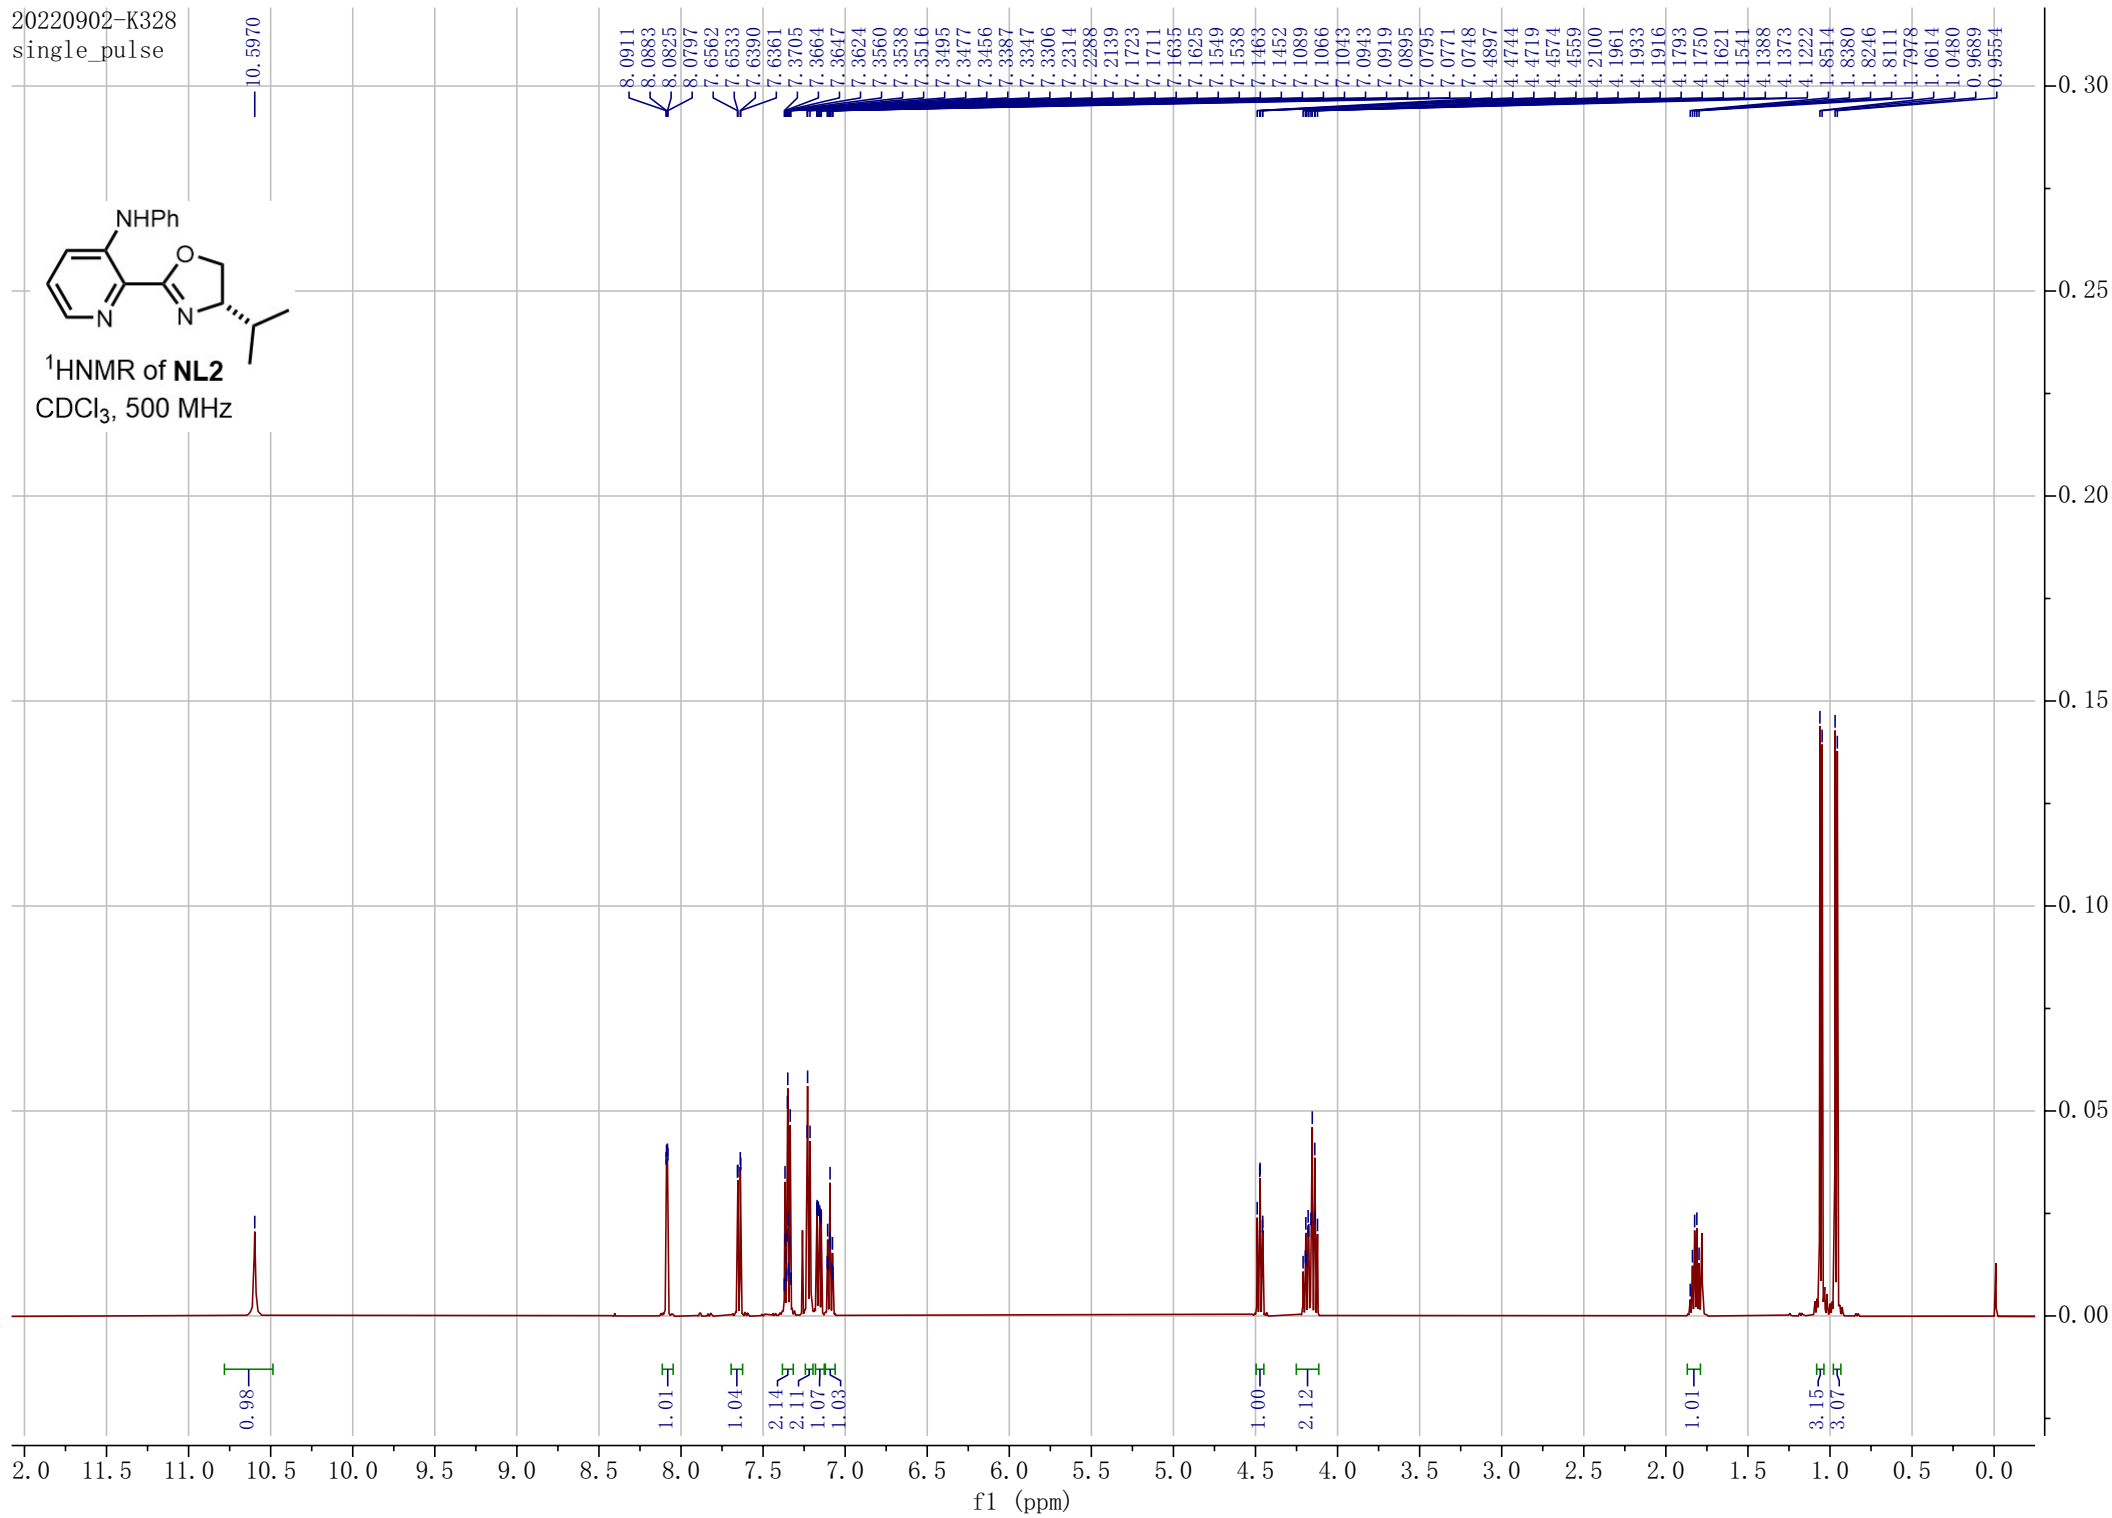

20220902-K328

single pulse decoupled gated NMR

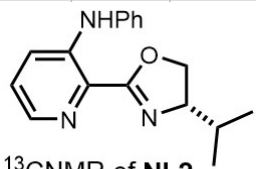

<sup>13</sup>CNMR of **NL2**  
CDCl<sub>3</sub>, 126 MHz

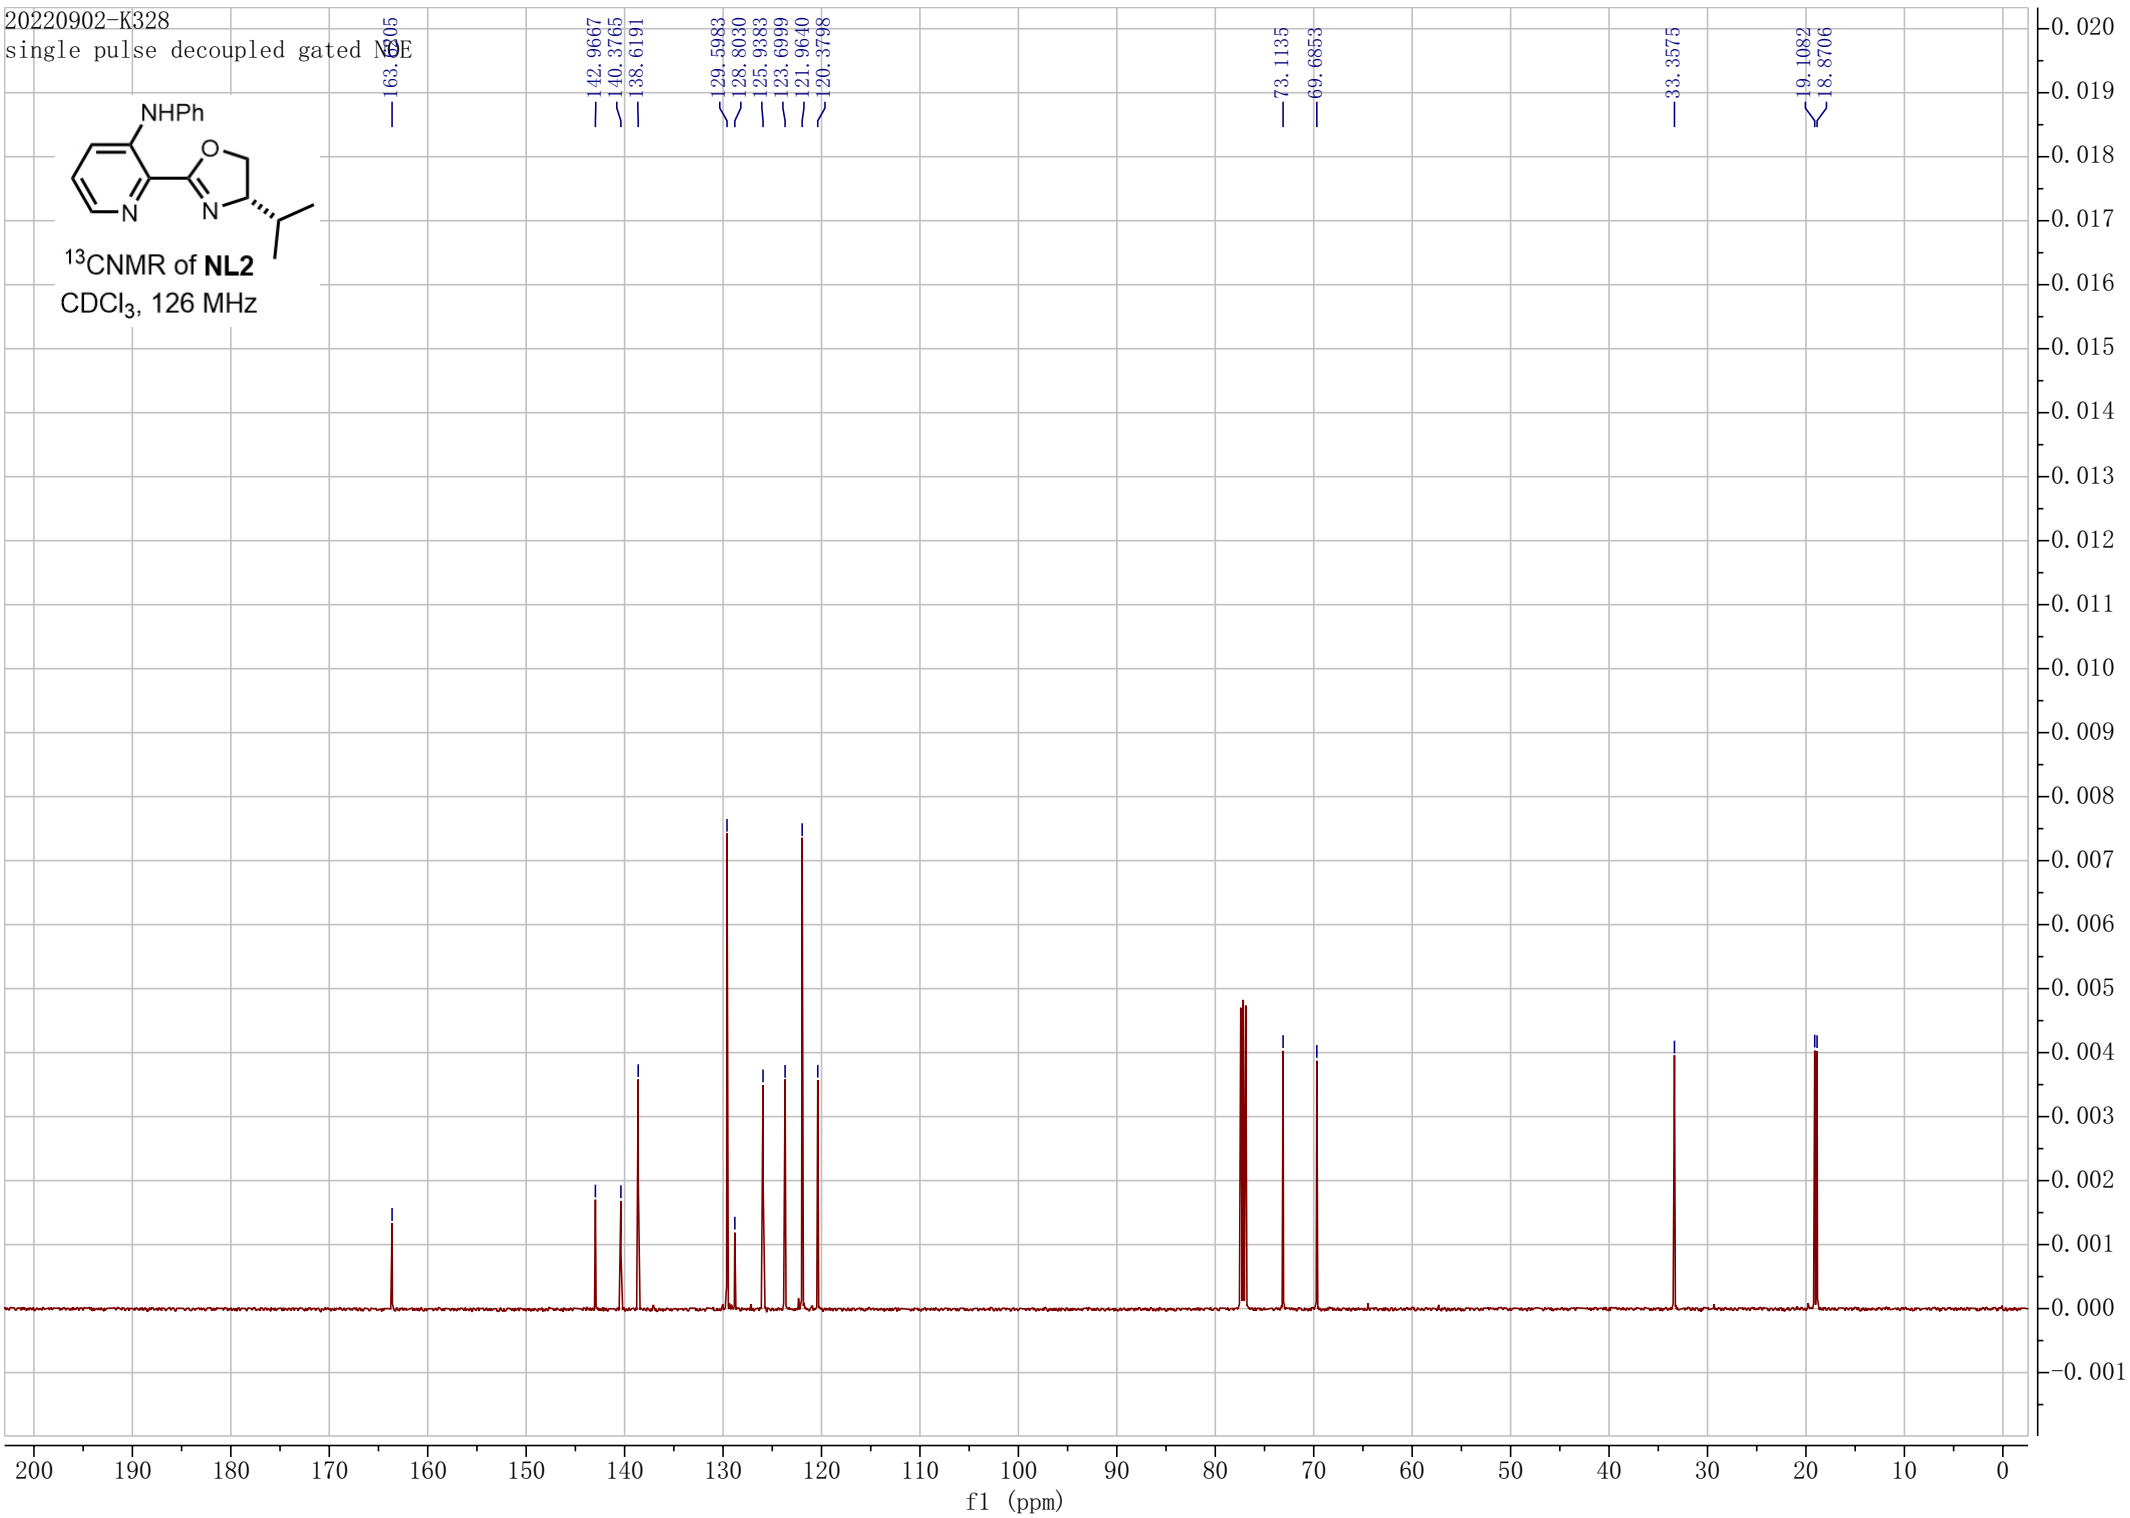

20220902-K329

single\_pulse

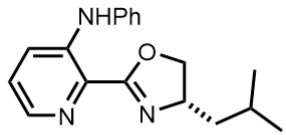

<sup>1</sup>HNMR of **NL3**

CDCl<sub>3</sub>, 500 MHz

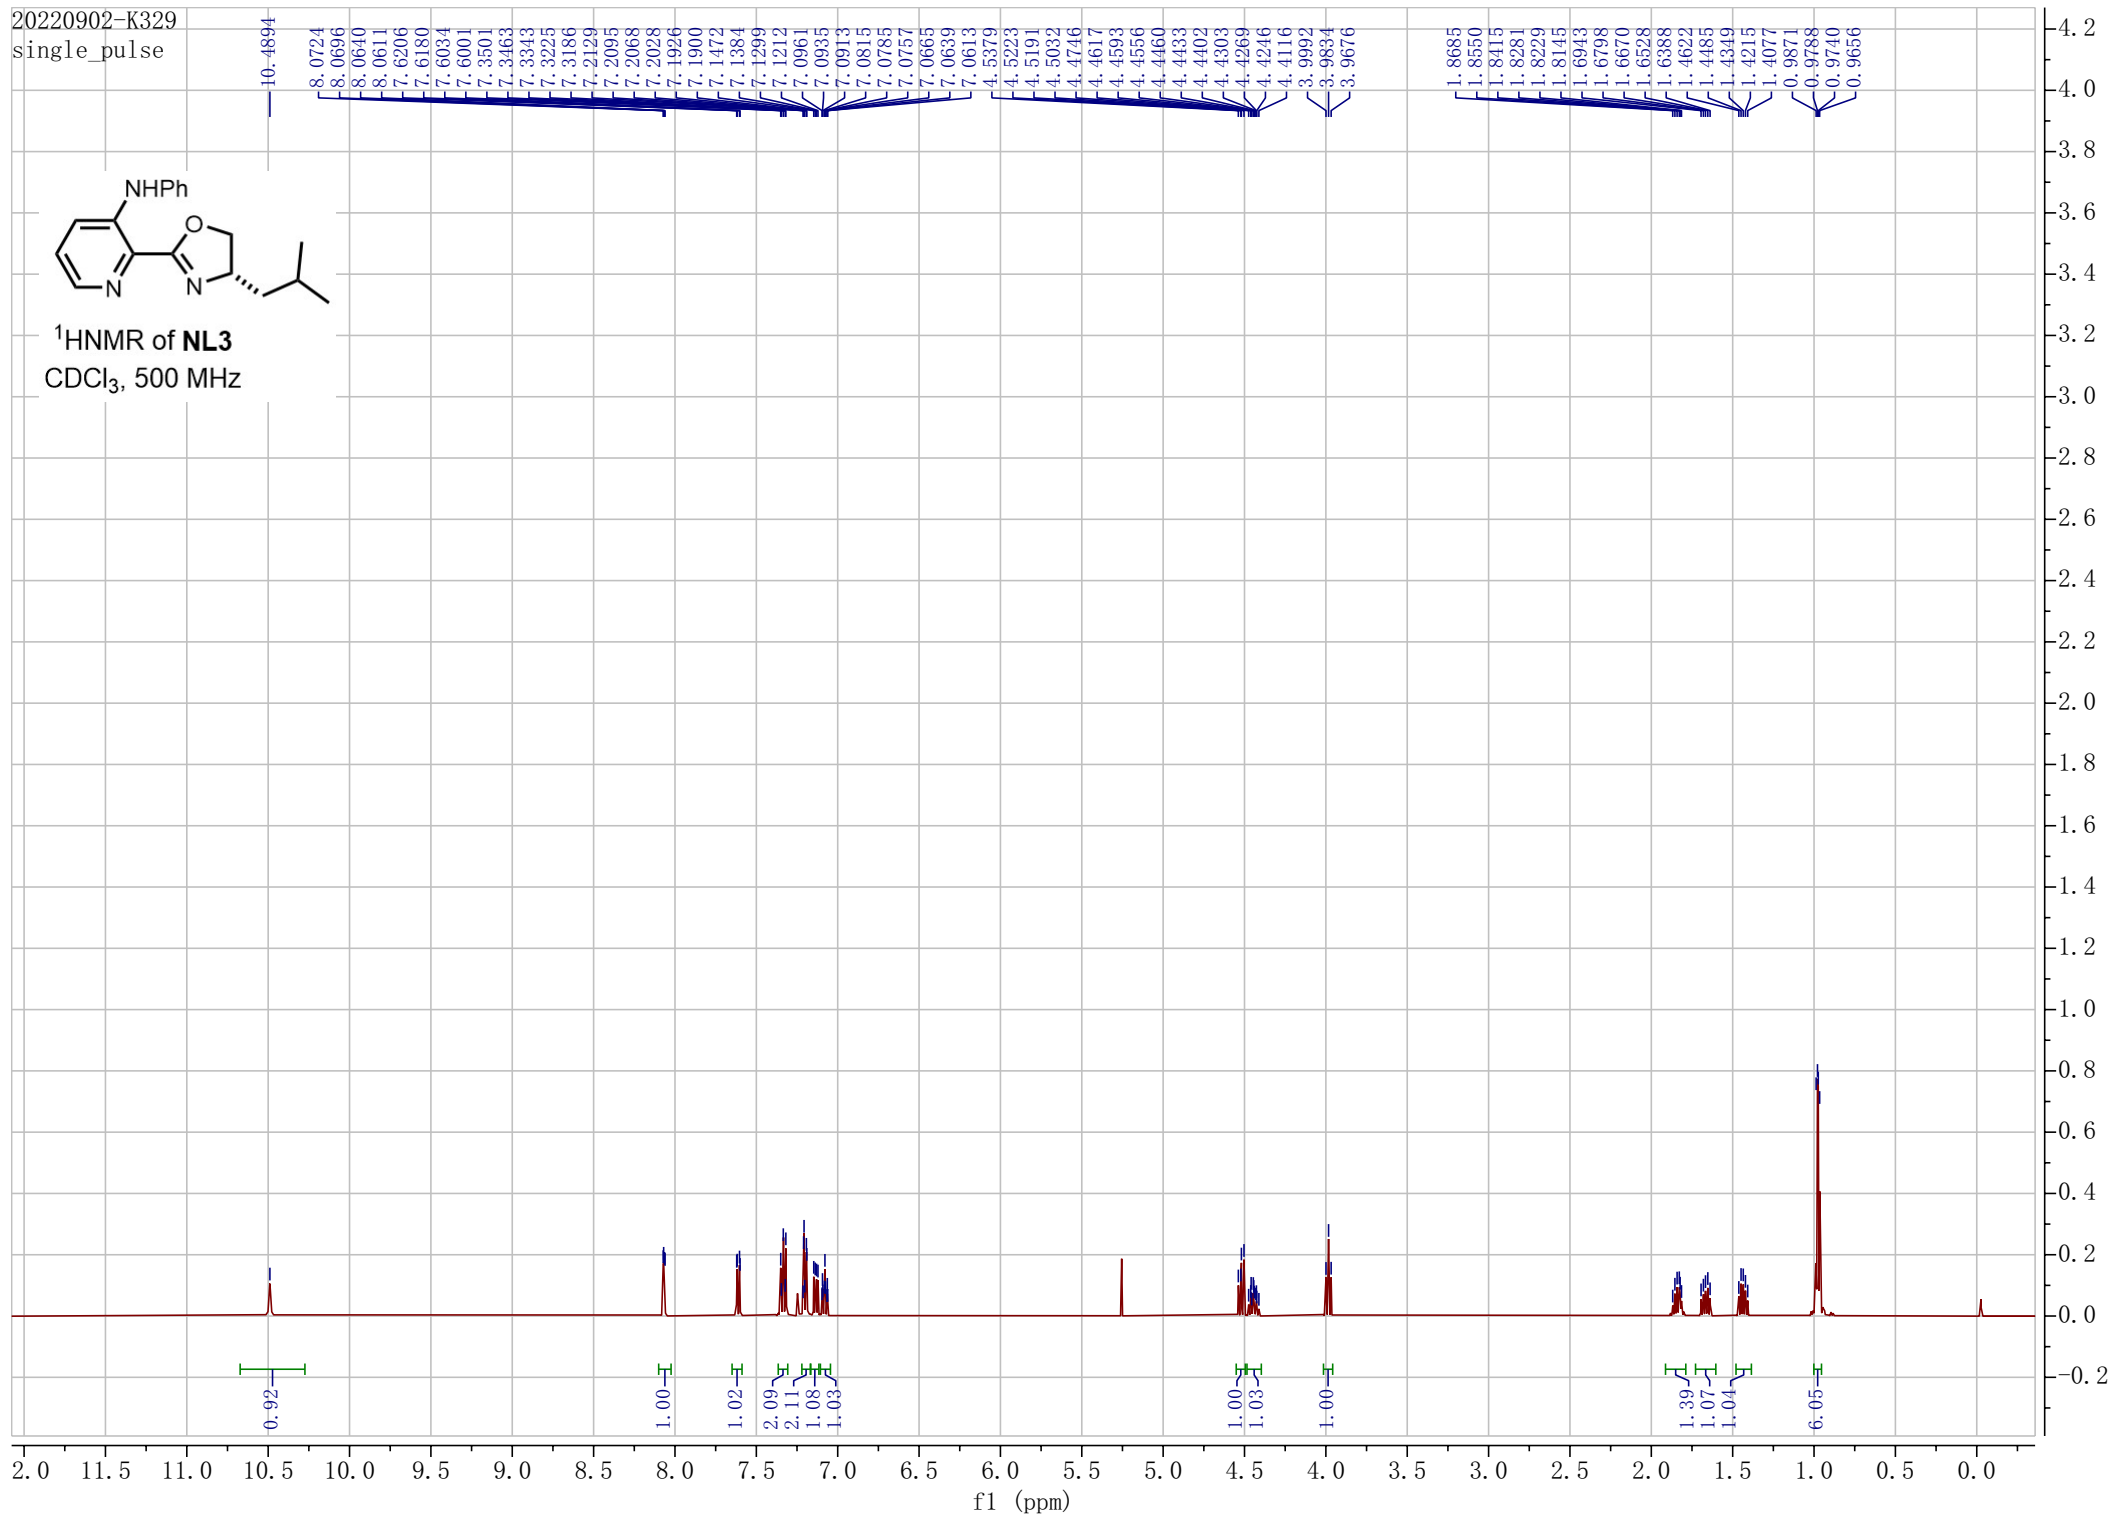

20220902-K329

single pulse decoupled gated 40E

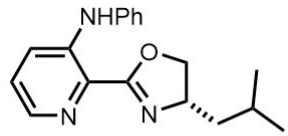

<sup>13</sup>CNMR of **NL3**  
CDCl<sub>3</sub>, 126 MHz

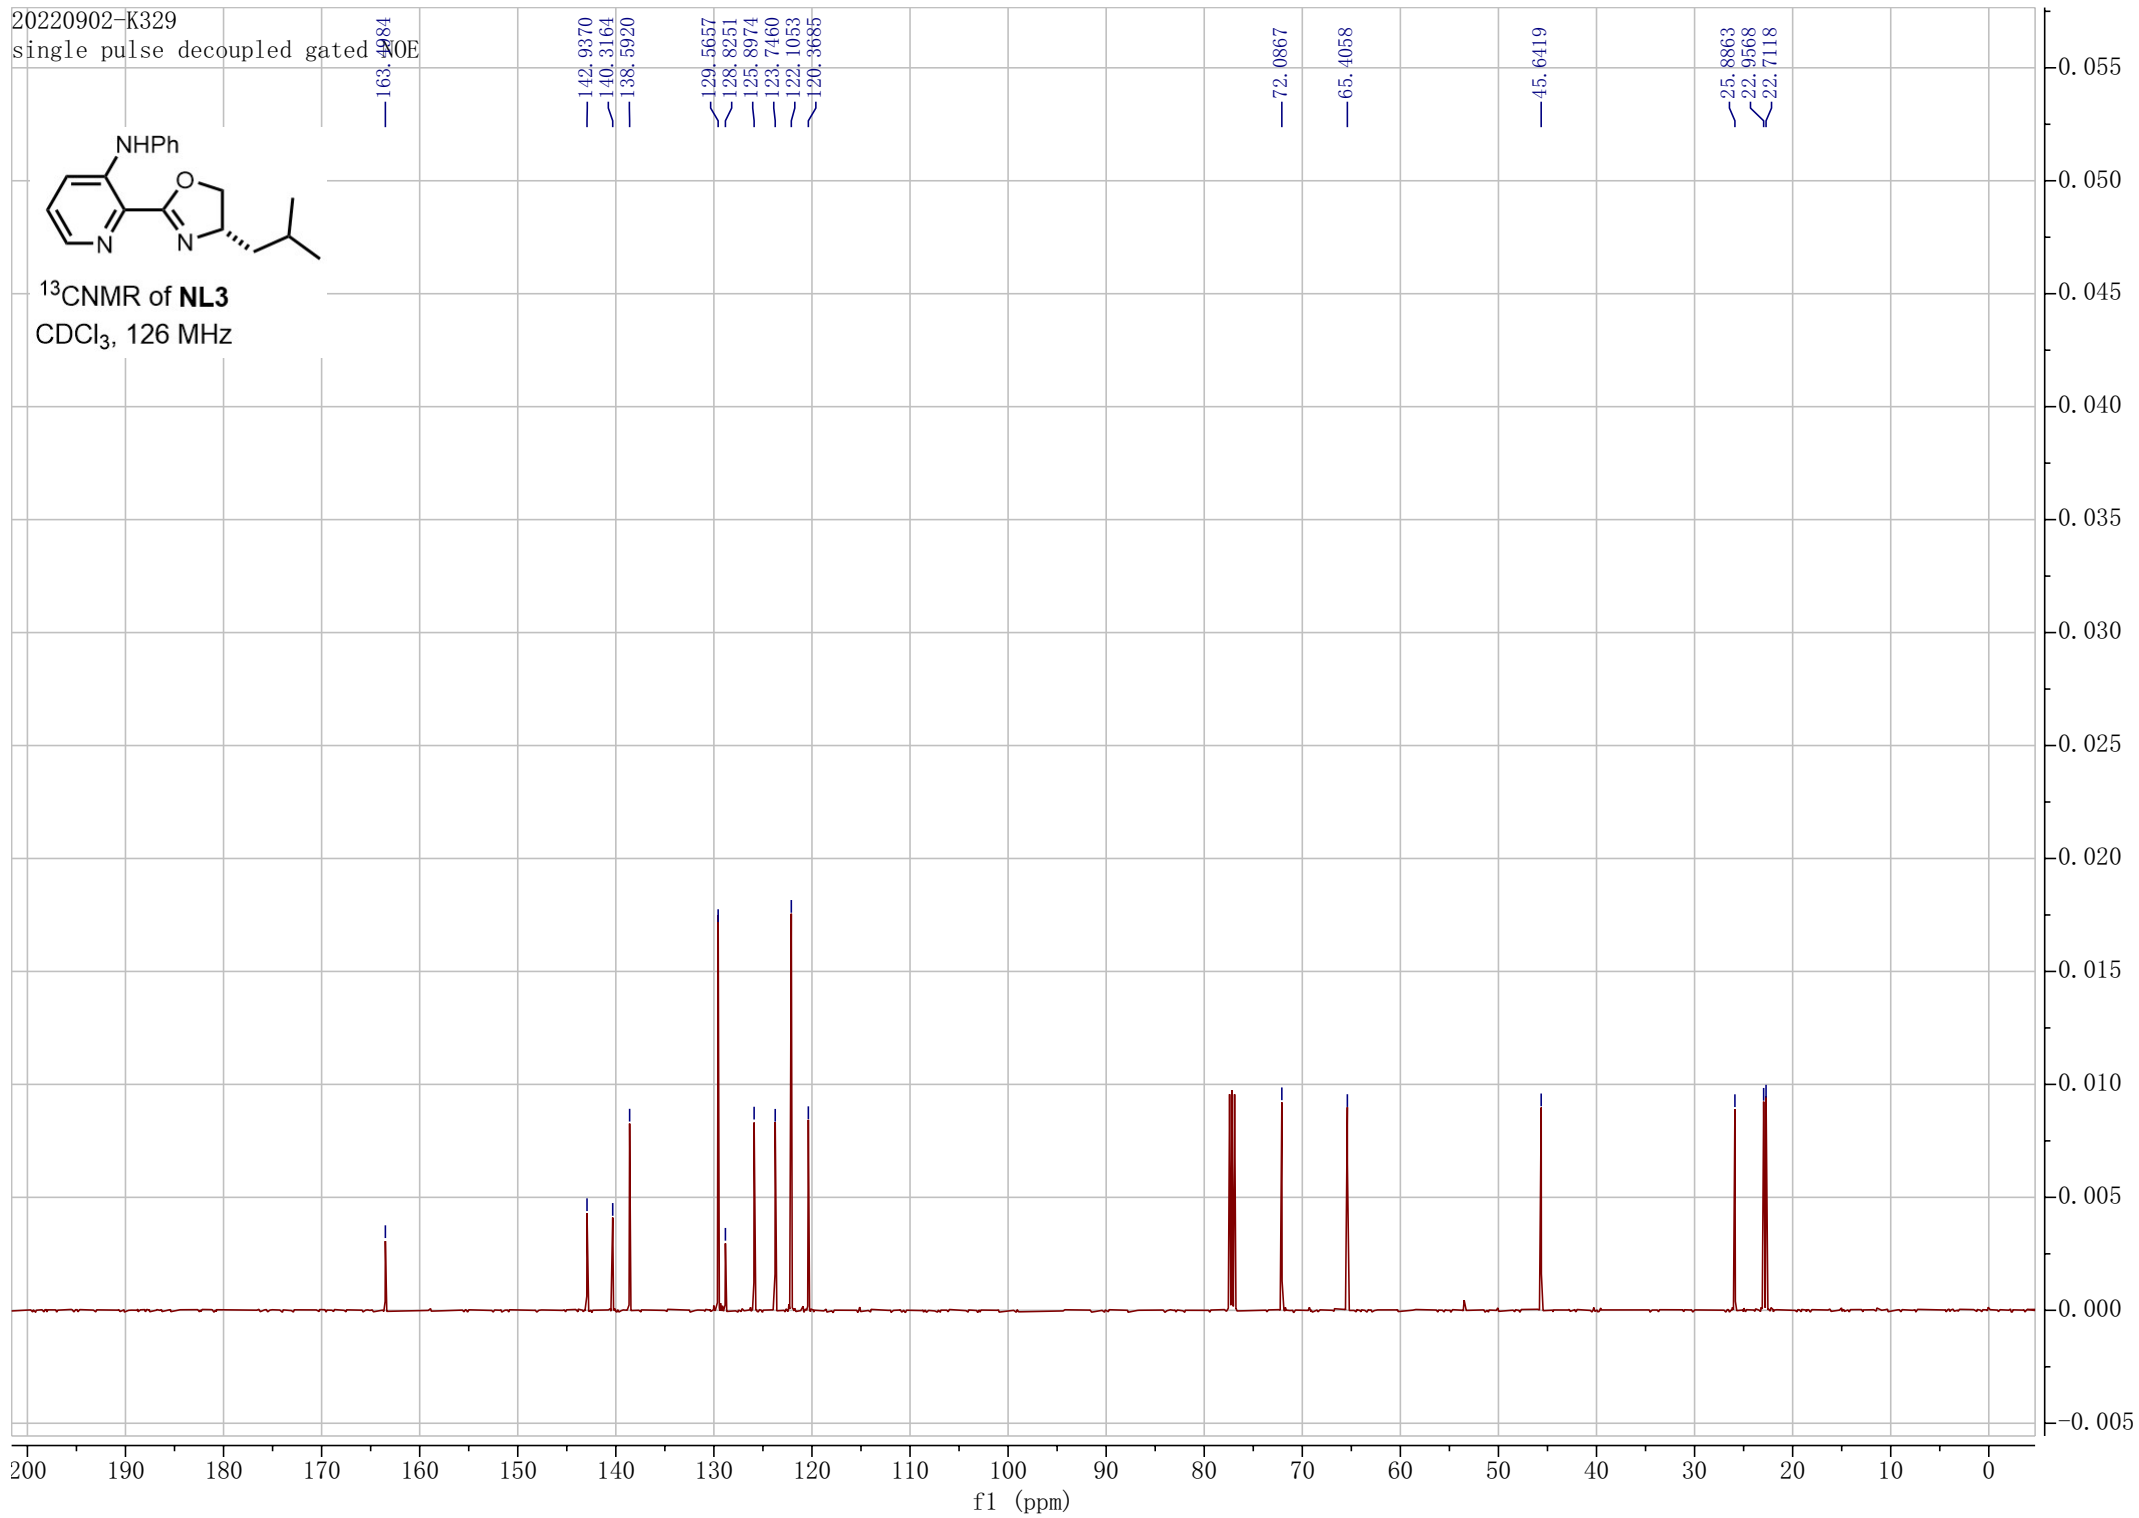



20220615-K324  
single\_pulse

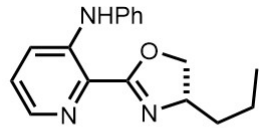

<sup>1</sup>H NMR of NL4  
CDCl<sub>3</sub>, 500 MHz

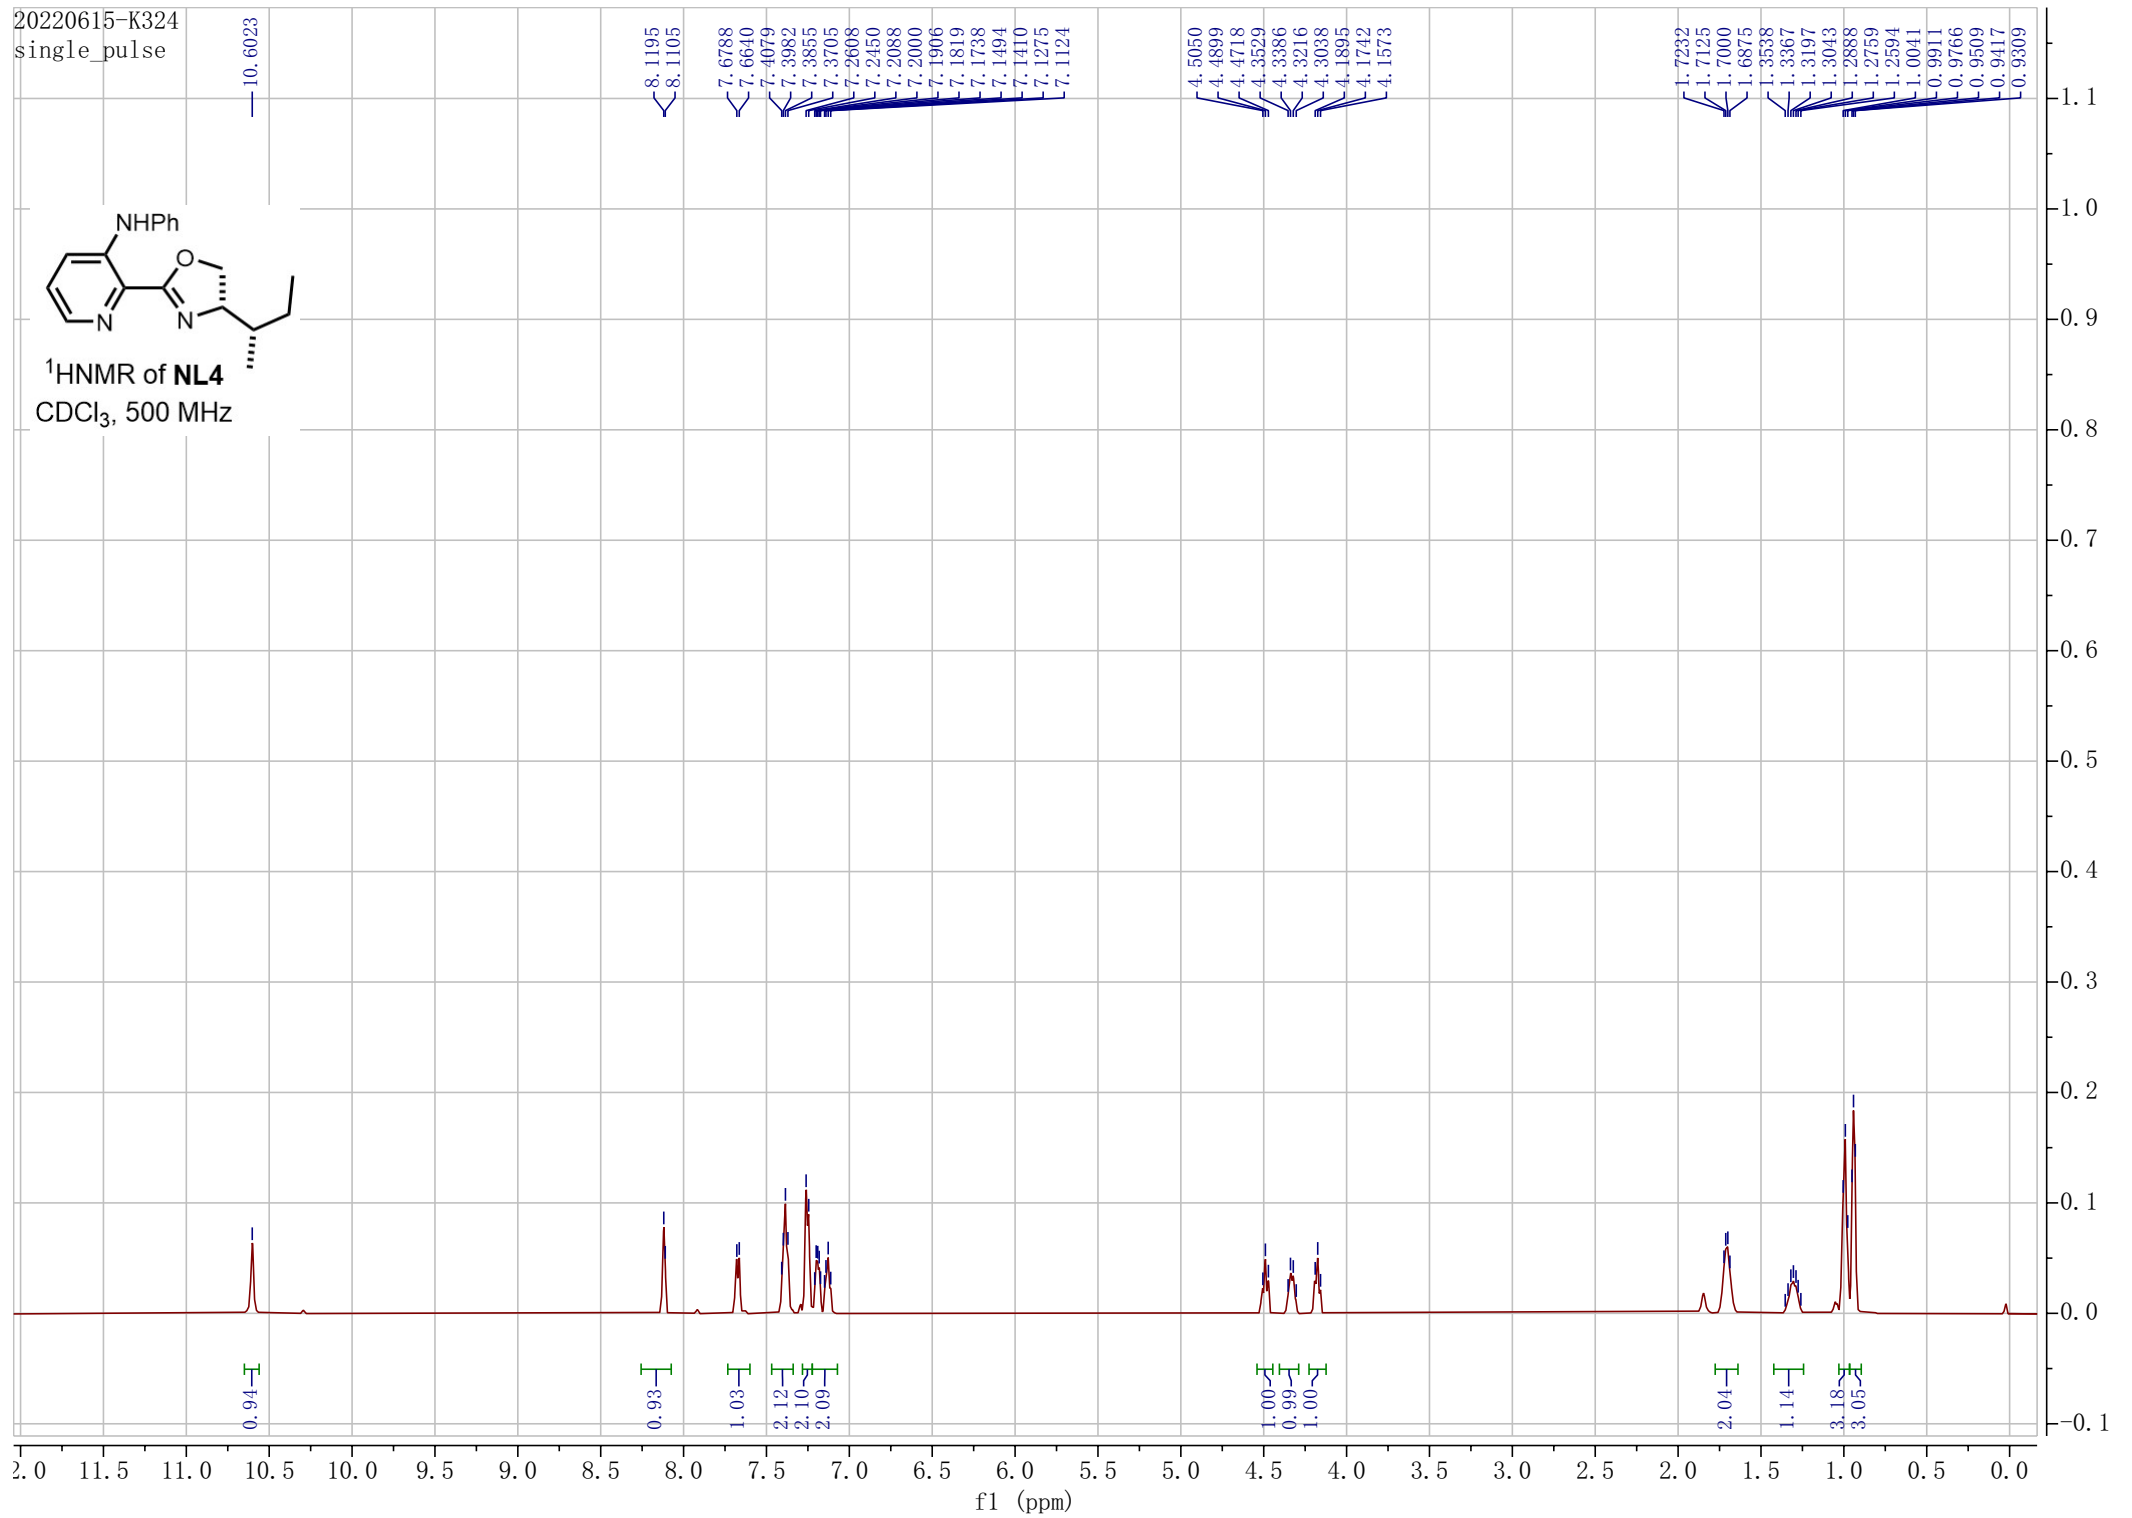

20220621-K324  
single pulse decoupled gated NMR

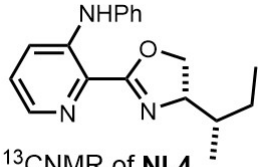

<sup>13</sup>CNMR of **NL4**  
CDCl<sub>3</sub>, 126 MHz

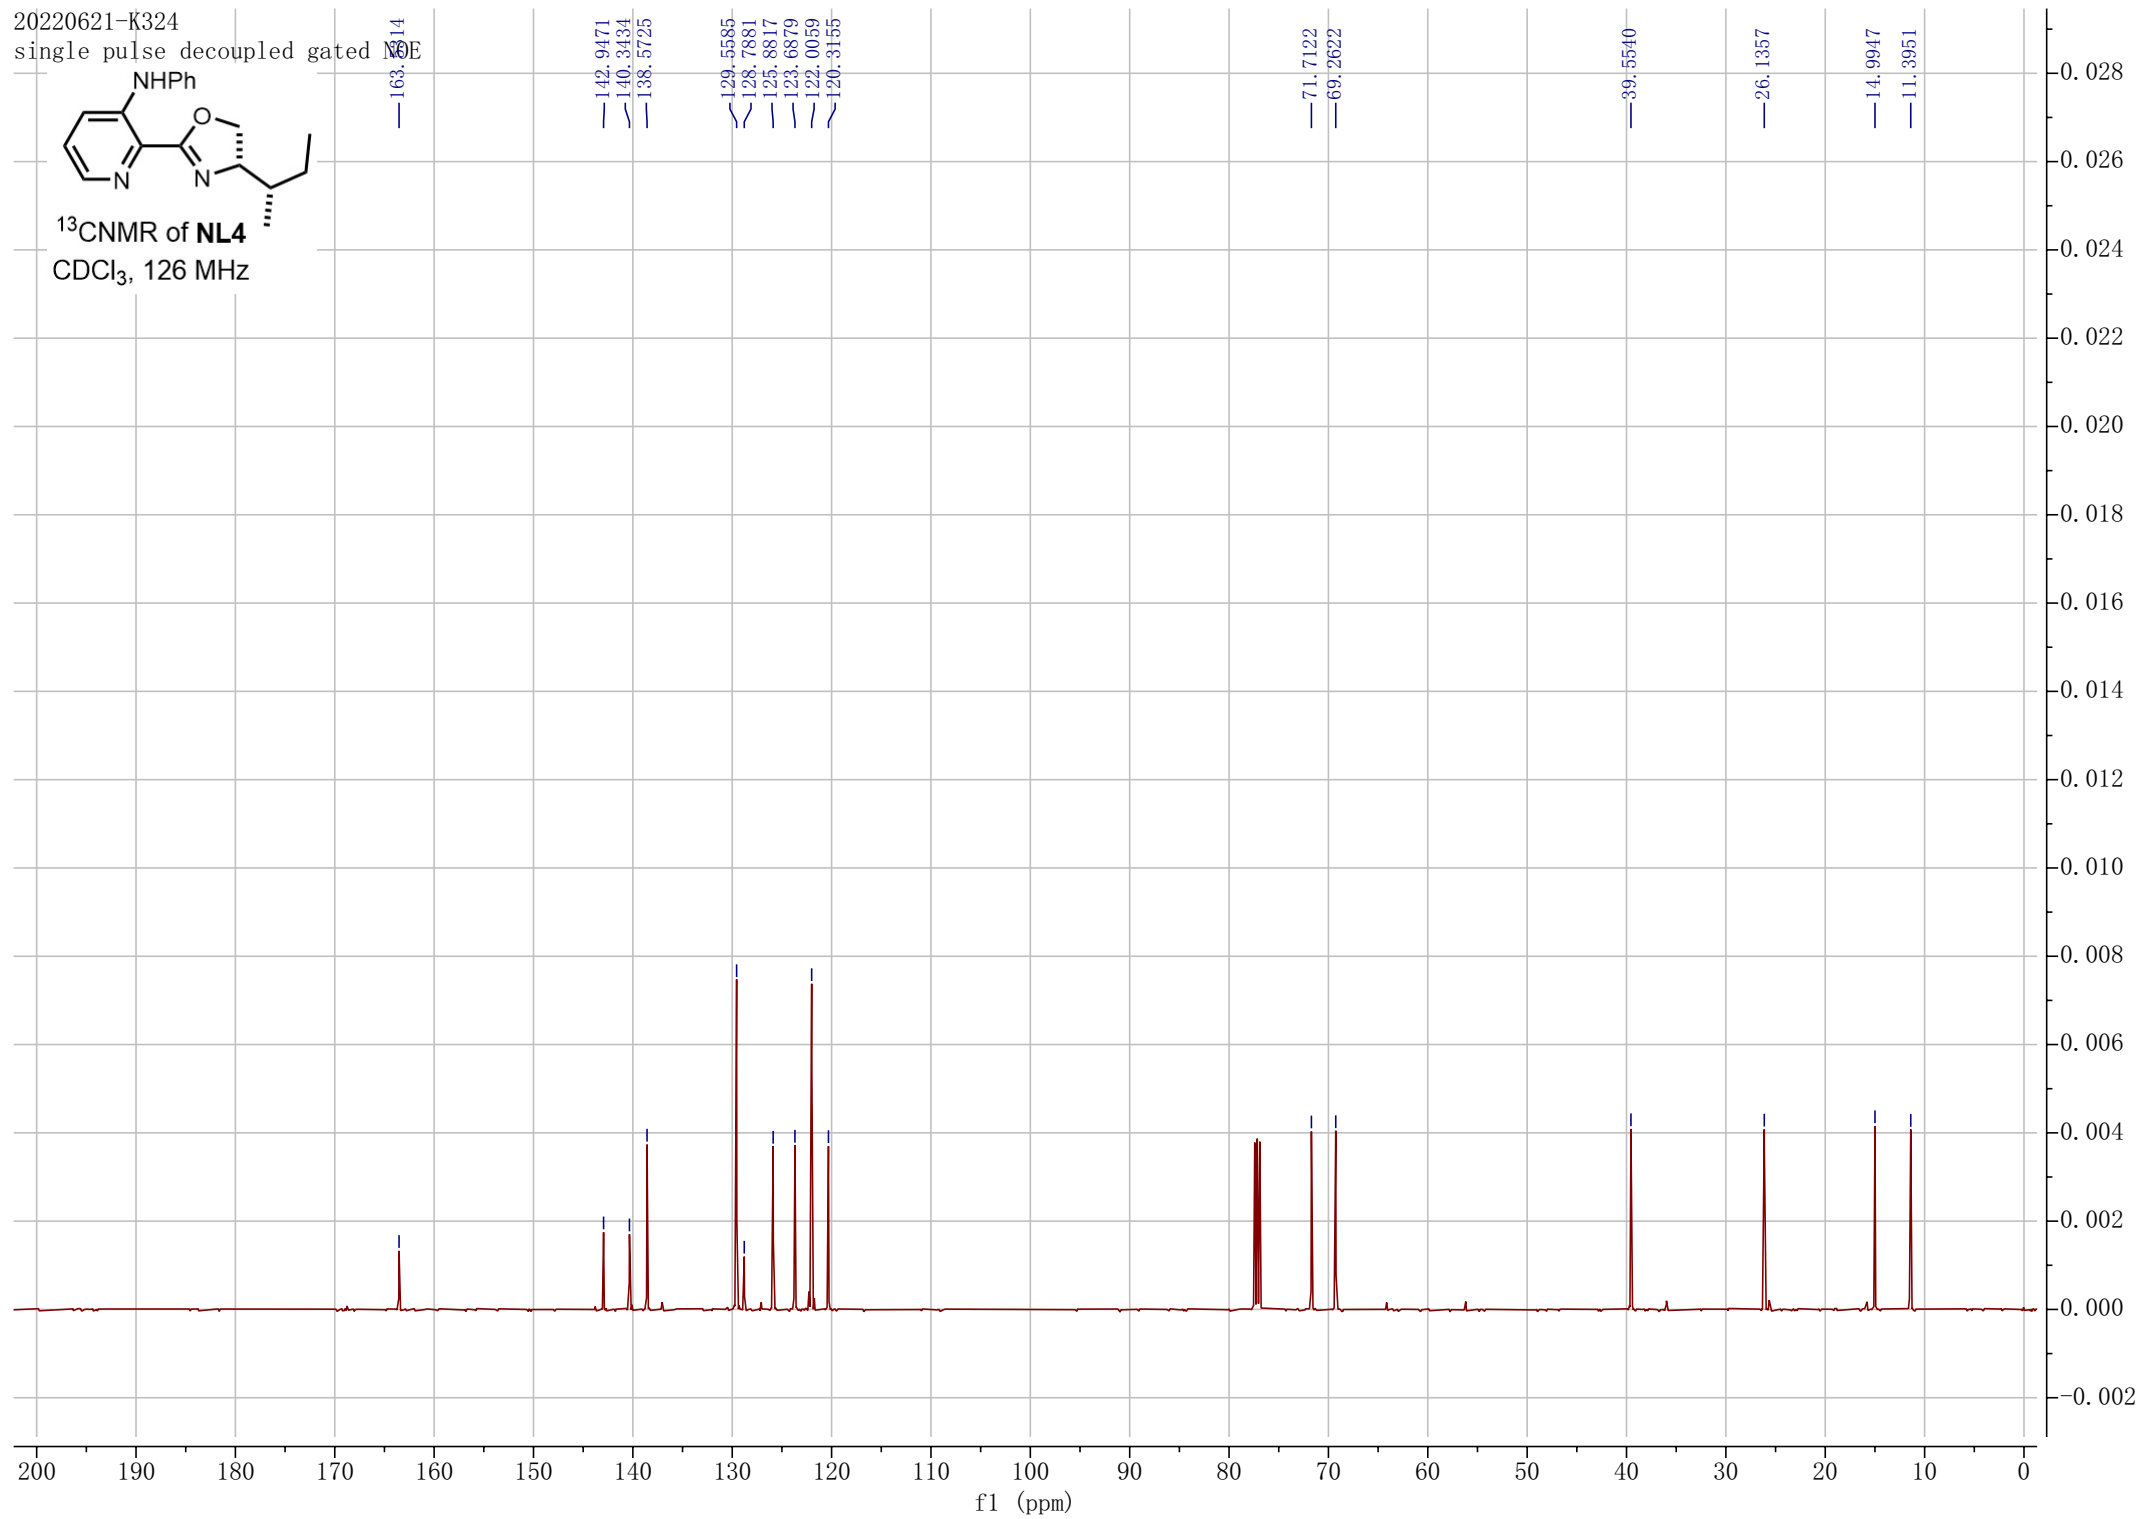

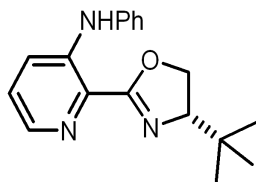

<sup>1</sup>H NMR of NL5  
500 MHz, CDCl<sub>3</sub>

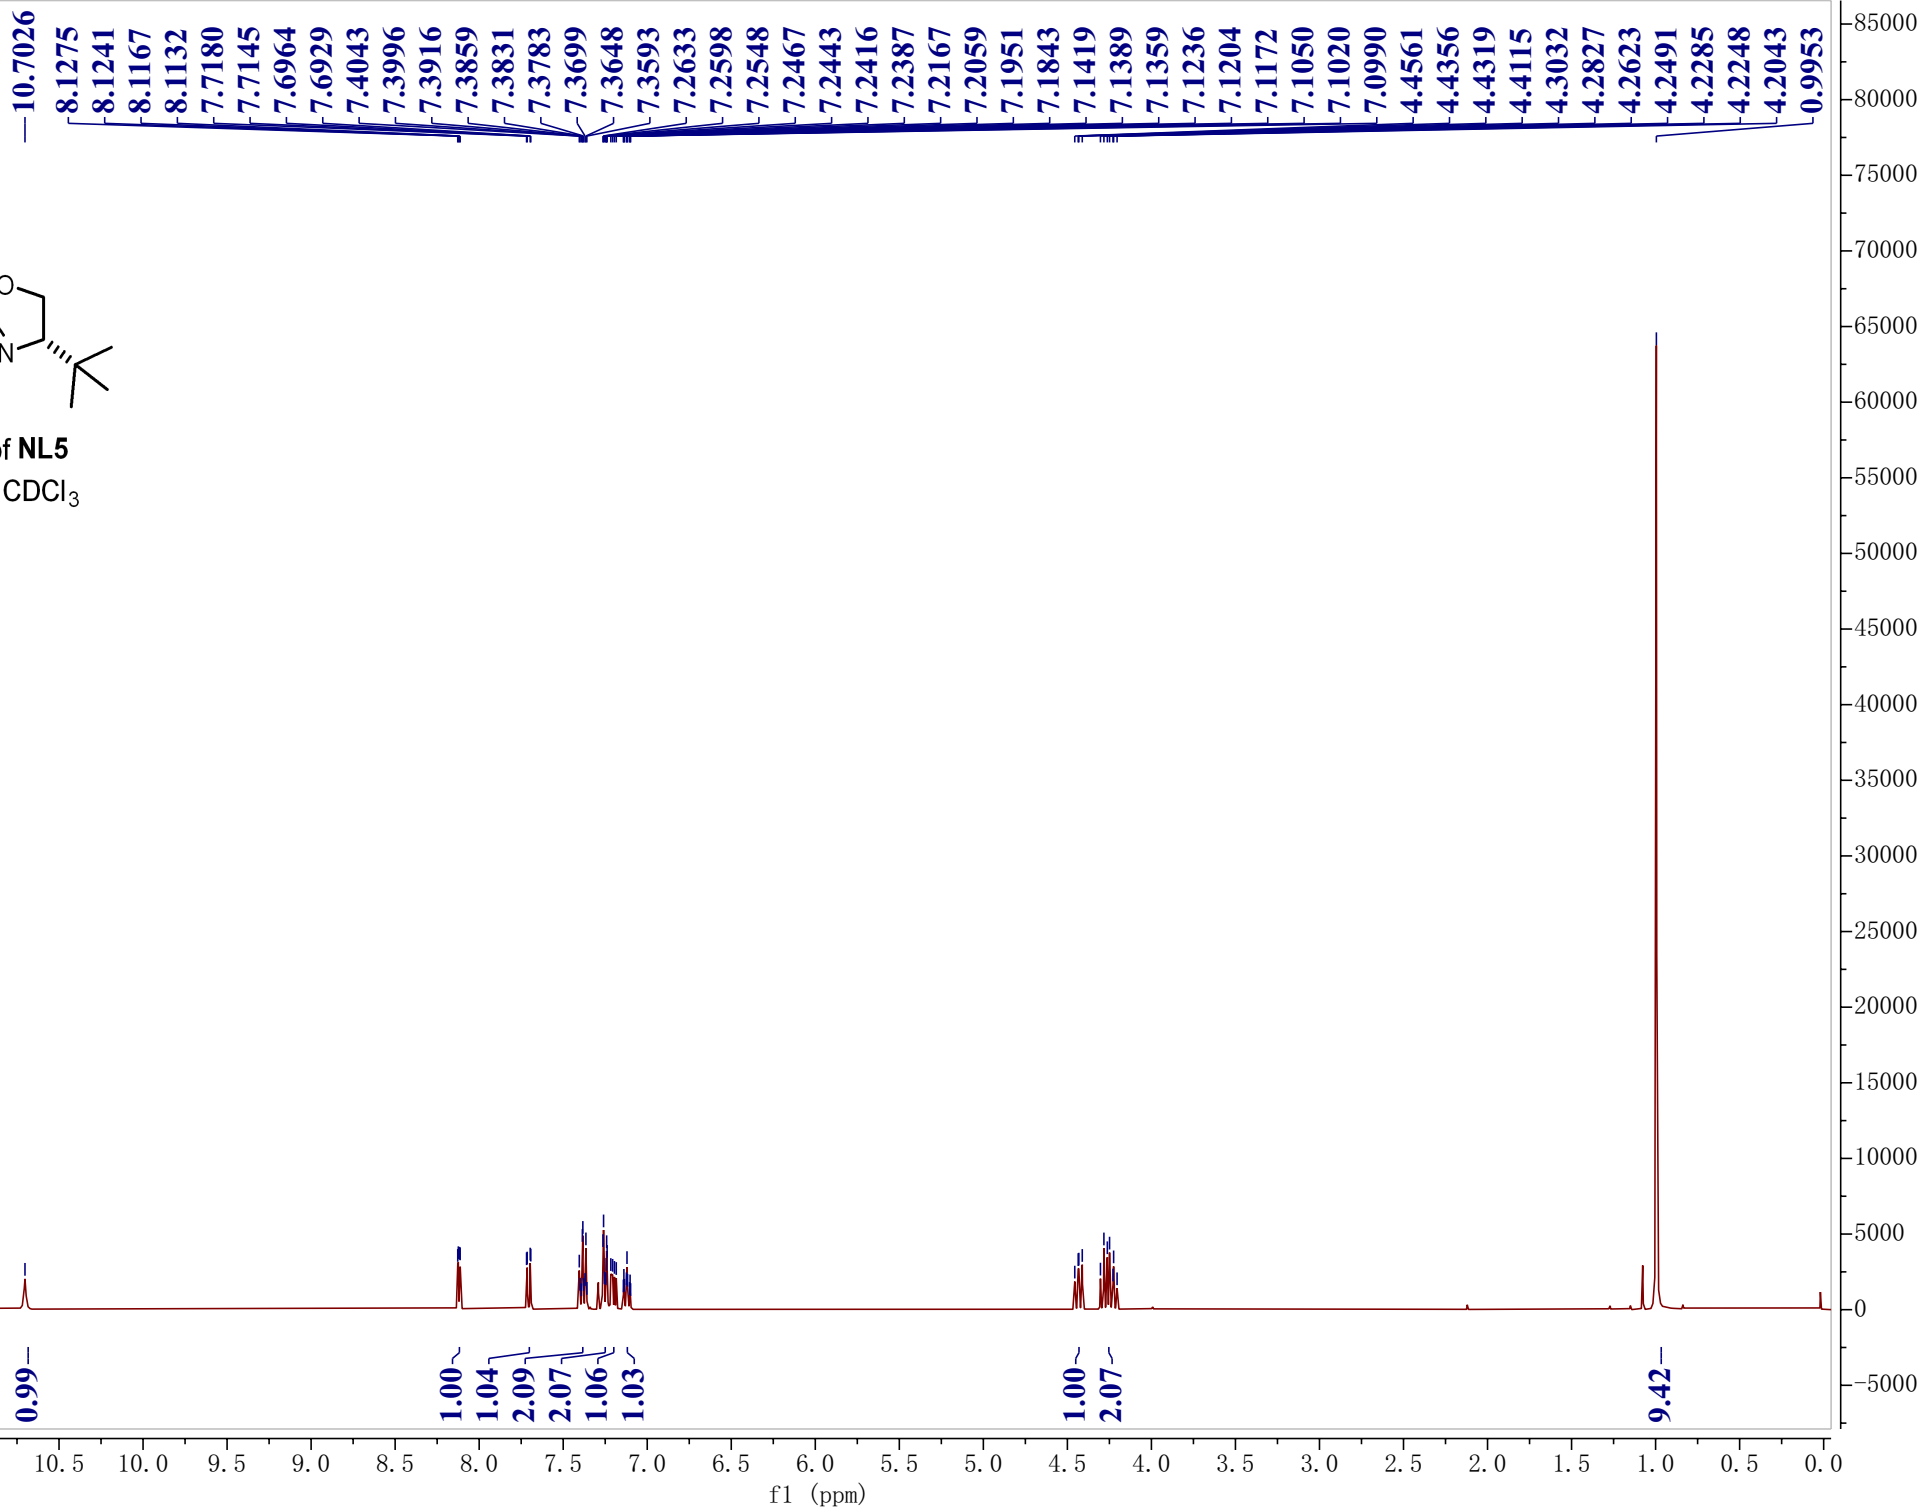

20220909-K412  
single pulse decoupled gated NOE

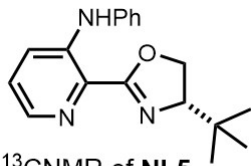

<sup>13</sup>CNMR of **NL5**  
CDCl<sub>3</sub>, 126 MHz

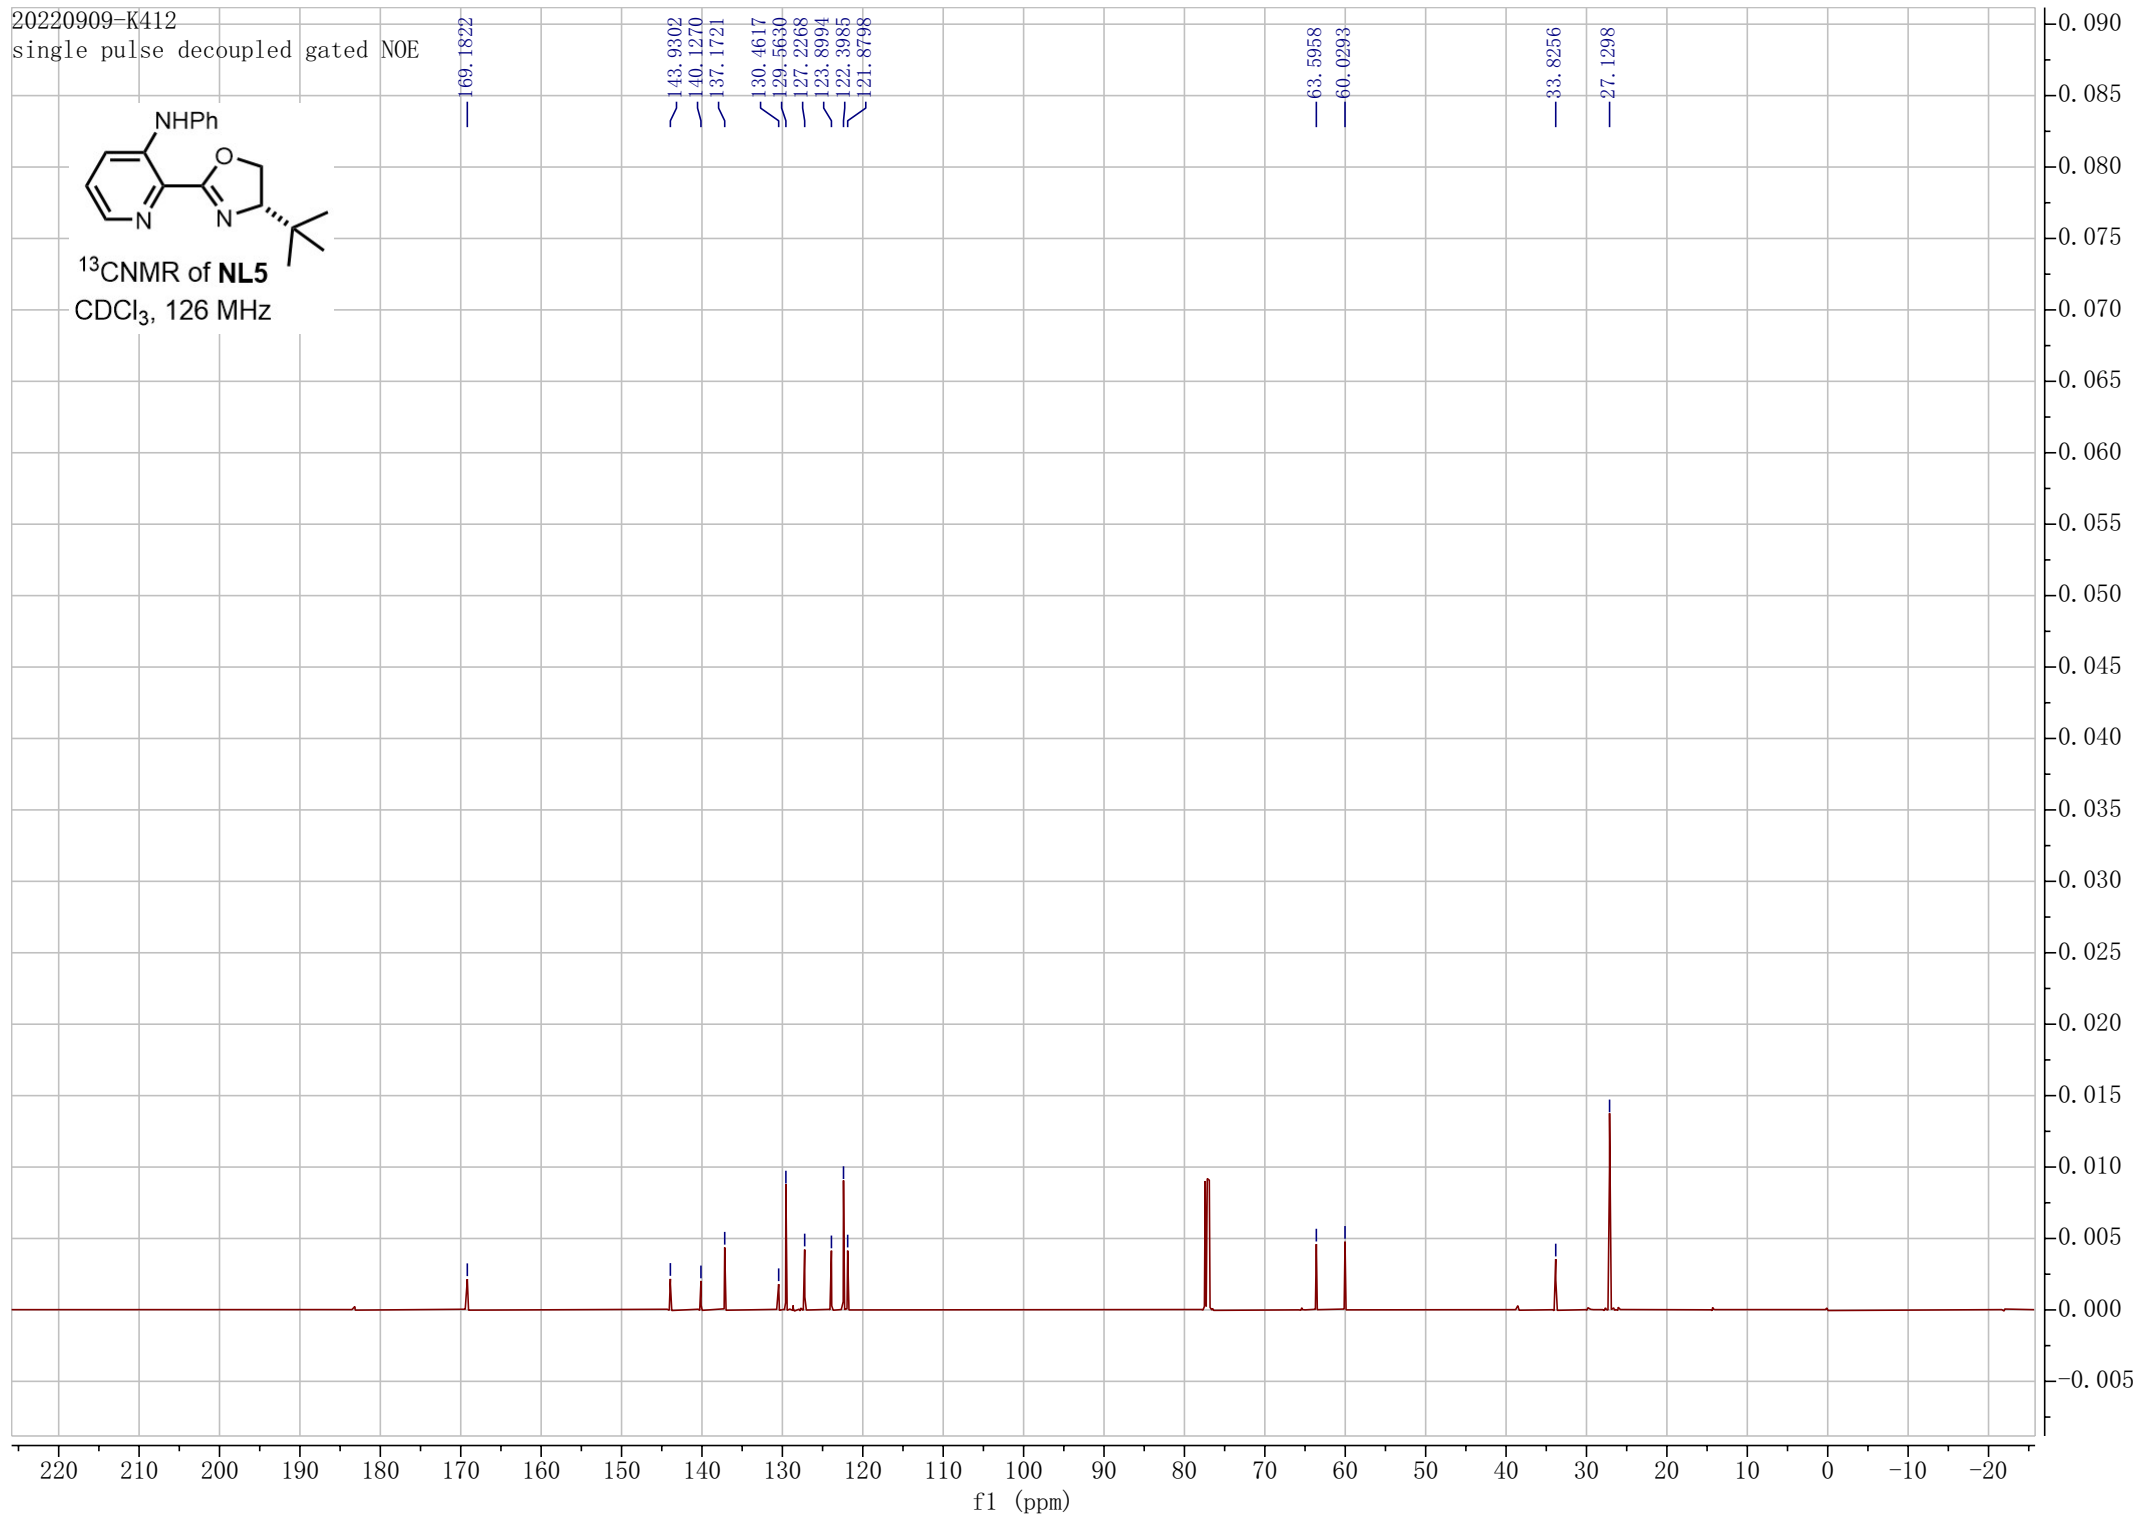

20220902-K330

single\_pulse

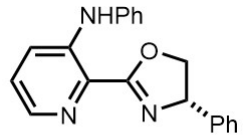

<sup>1</sup>HNMR of **NL6**  
CDCl<sub>3</sub>, 500 MHz

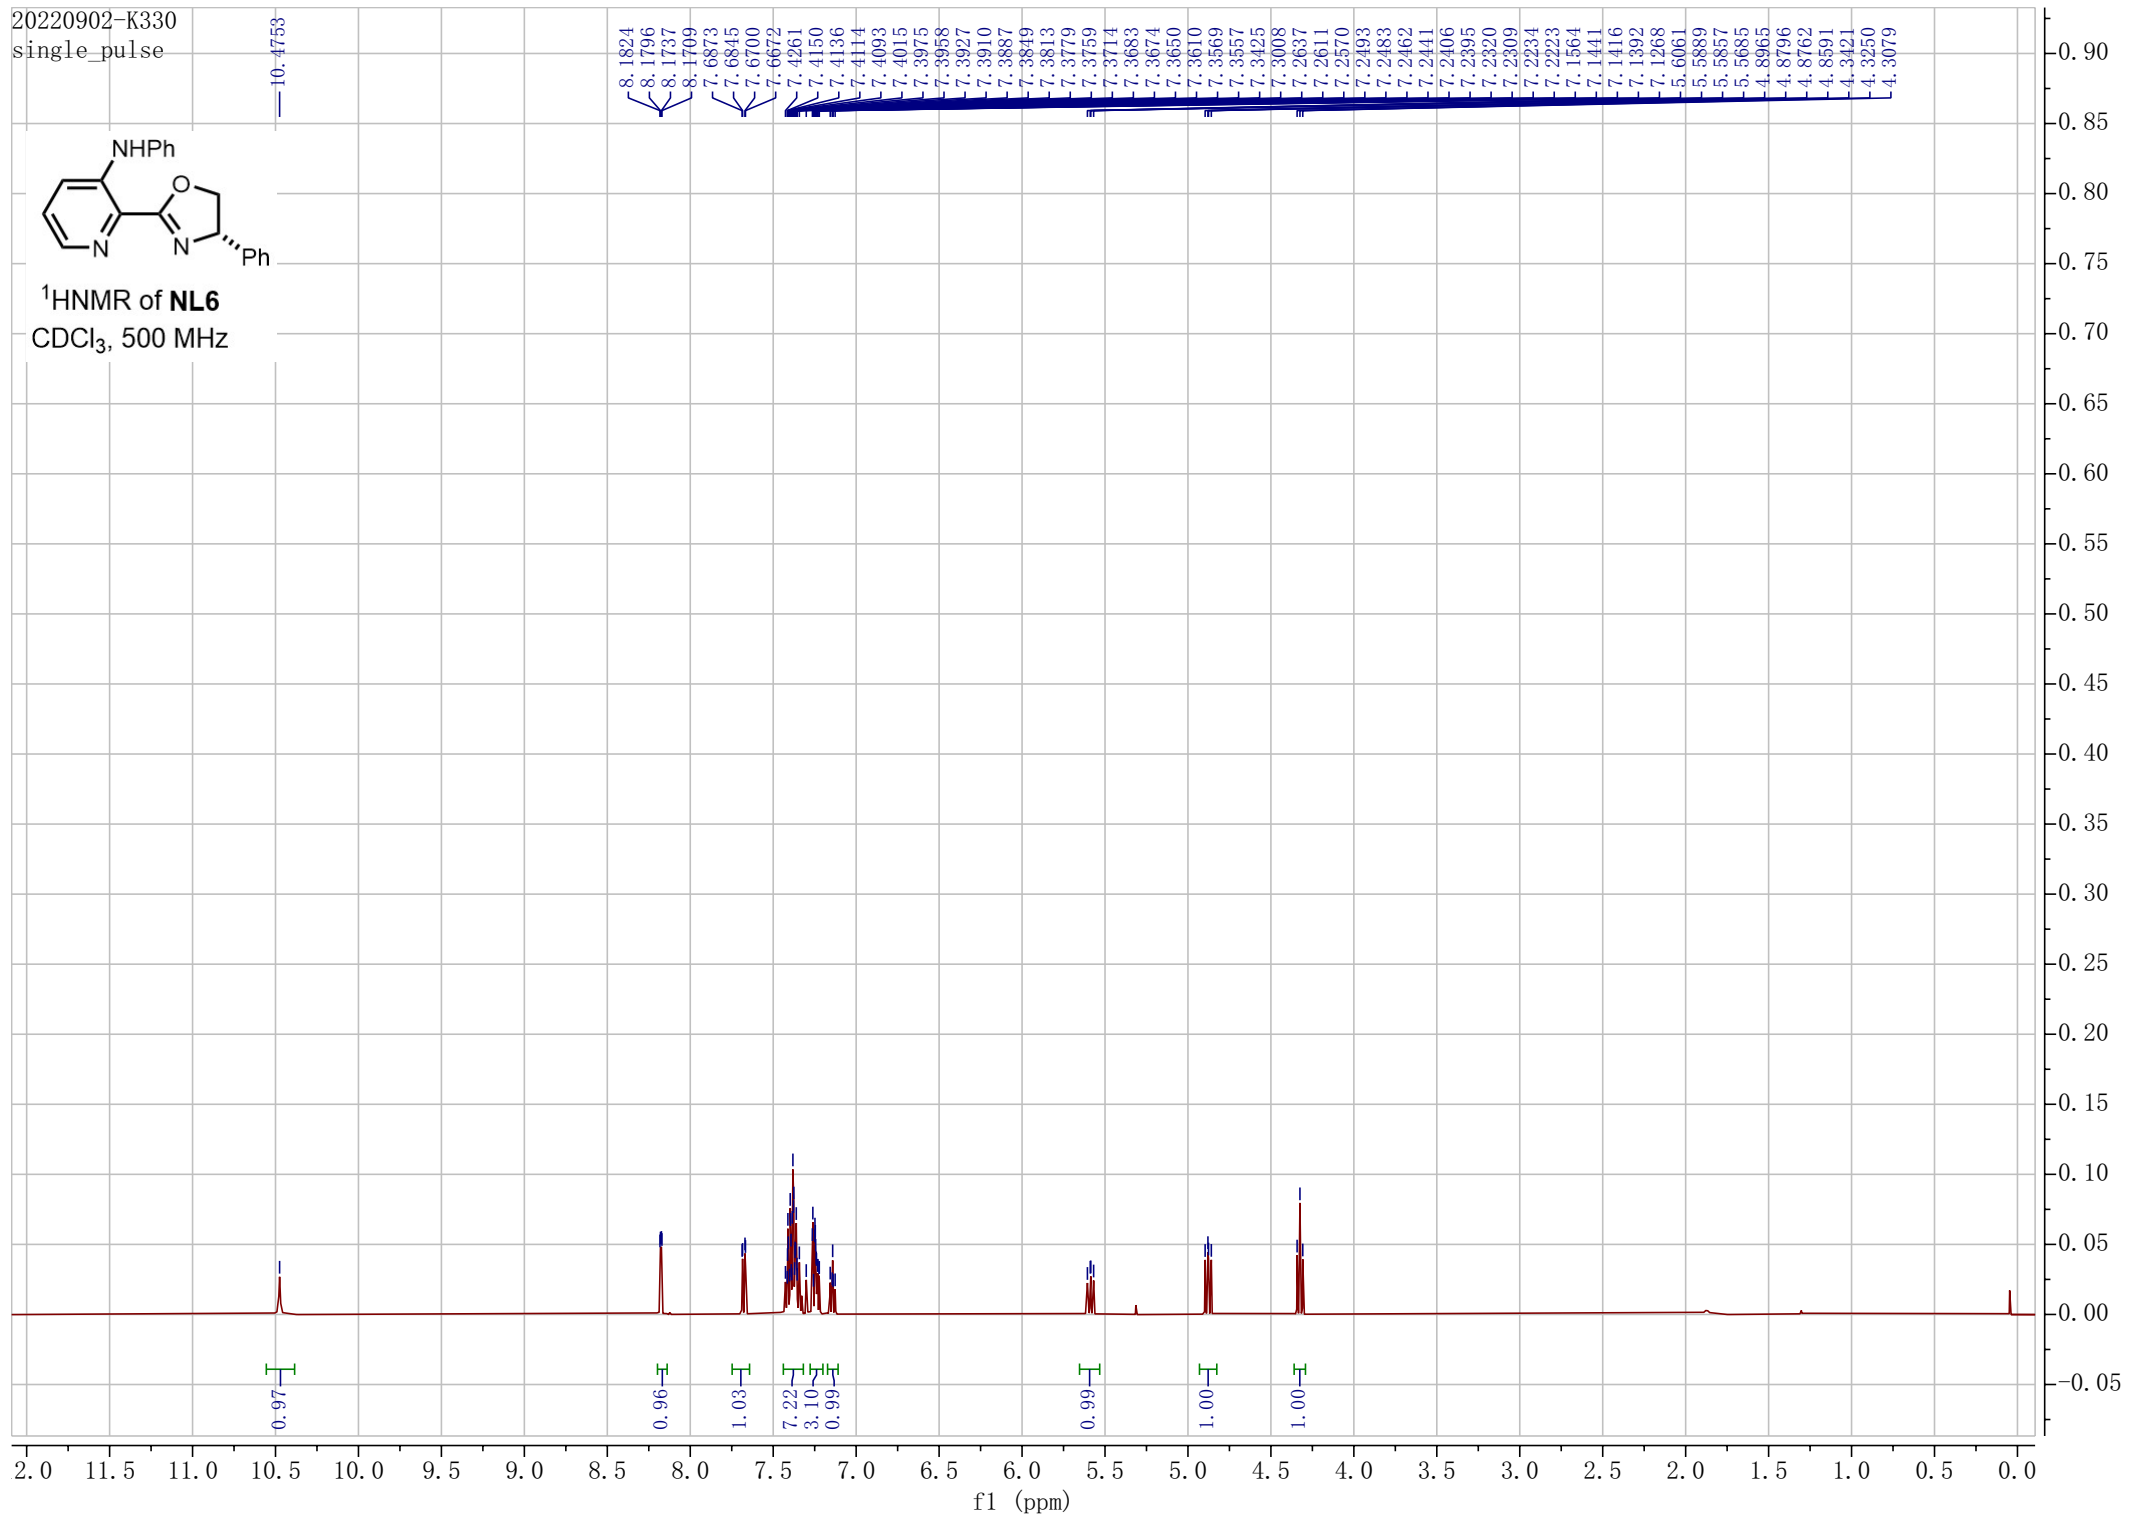

20220902-K330  
single pulse decoupled gated NOE

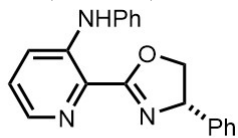

<sup>13</sup>CNMR of **NL6**  
CDCl<sub>3</sub>, 126 MHz

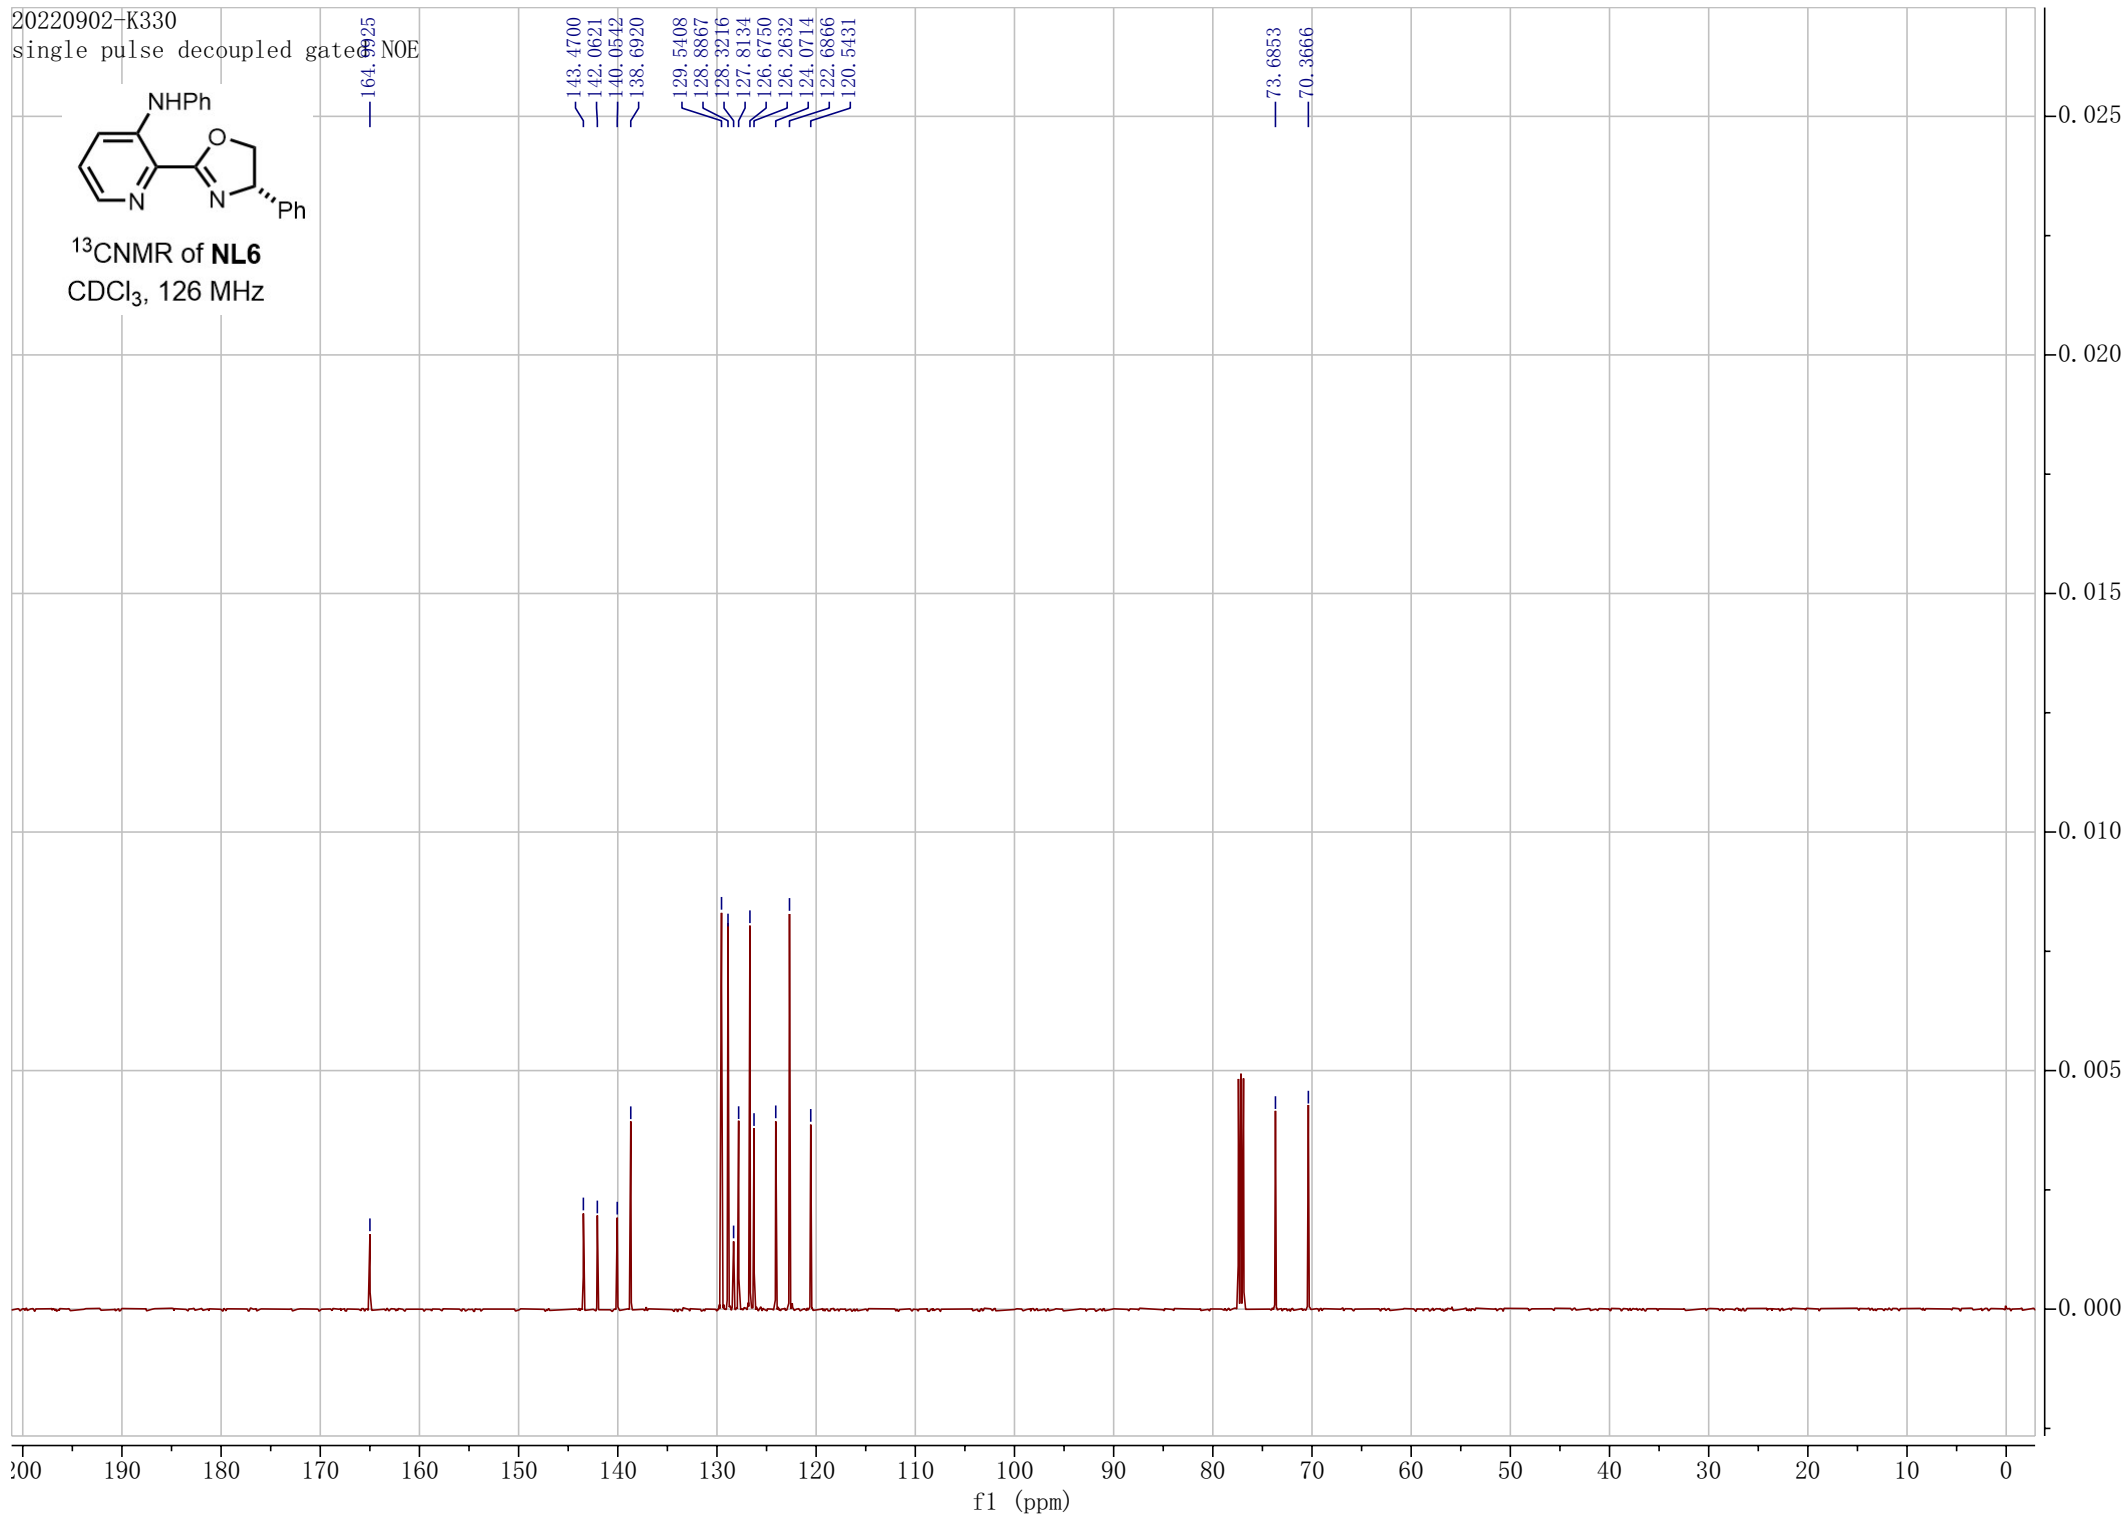

20220902-K331  
single\_pulse

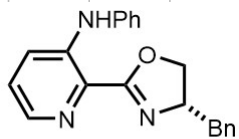

<sup>1</sup>HNMR of **NL7**  
CDCl<sub>3</sub>, 500 MHz

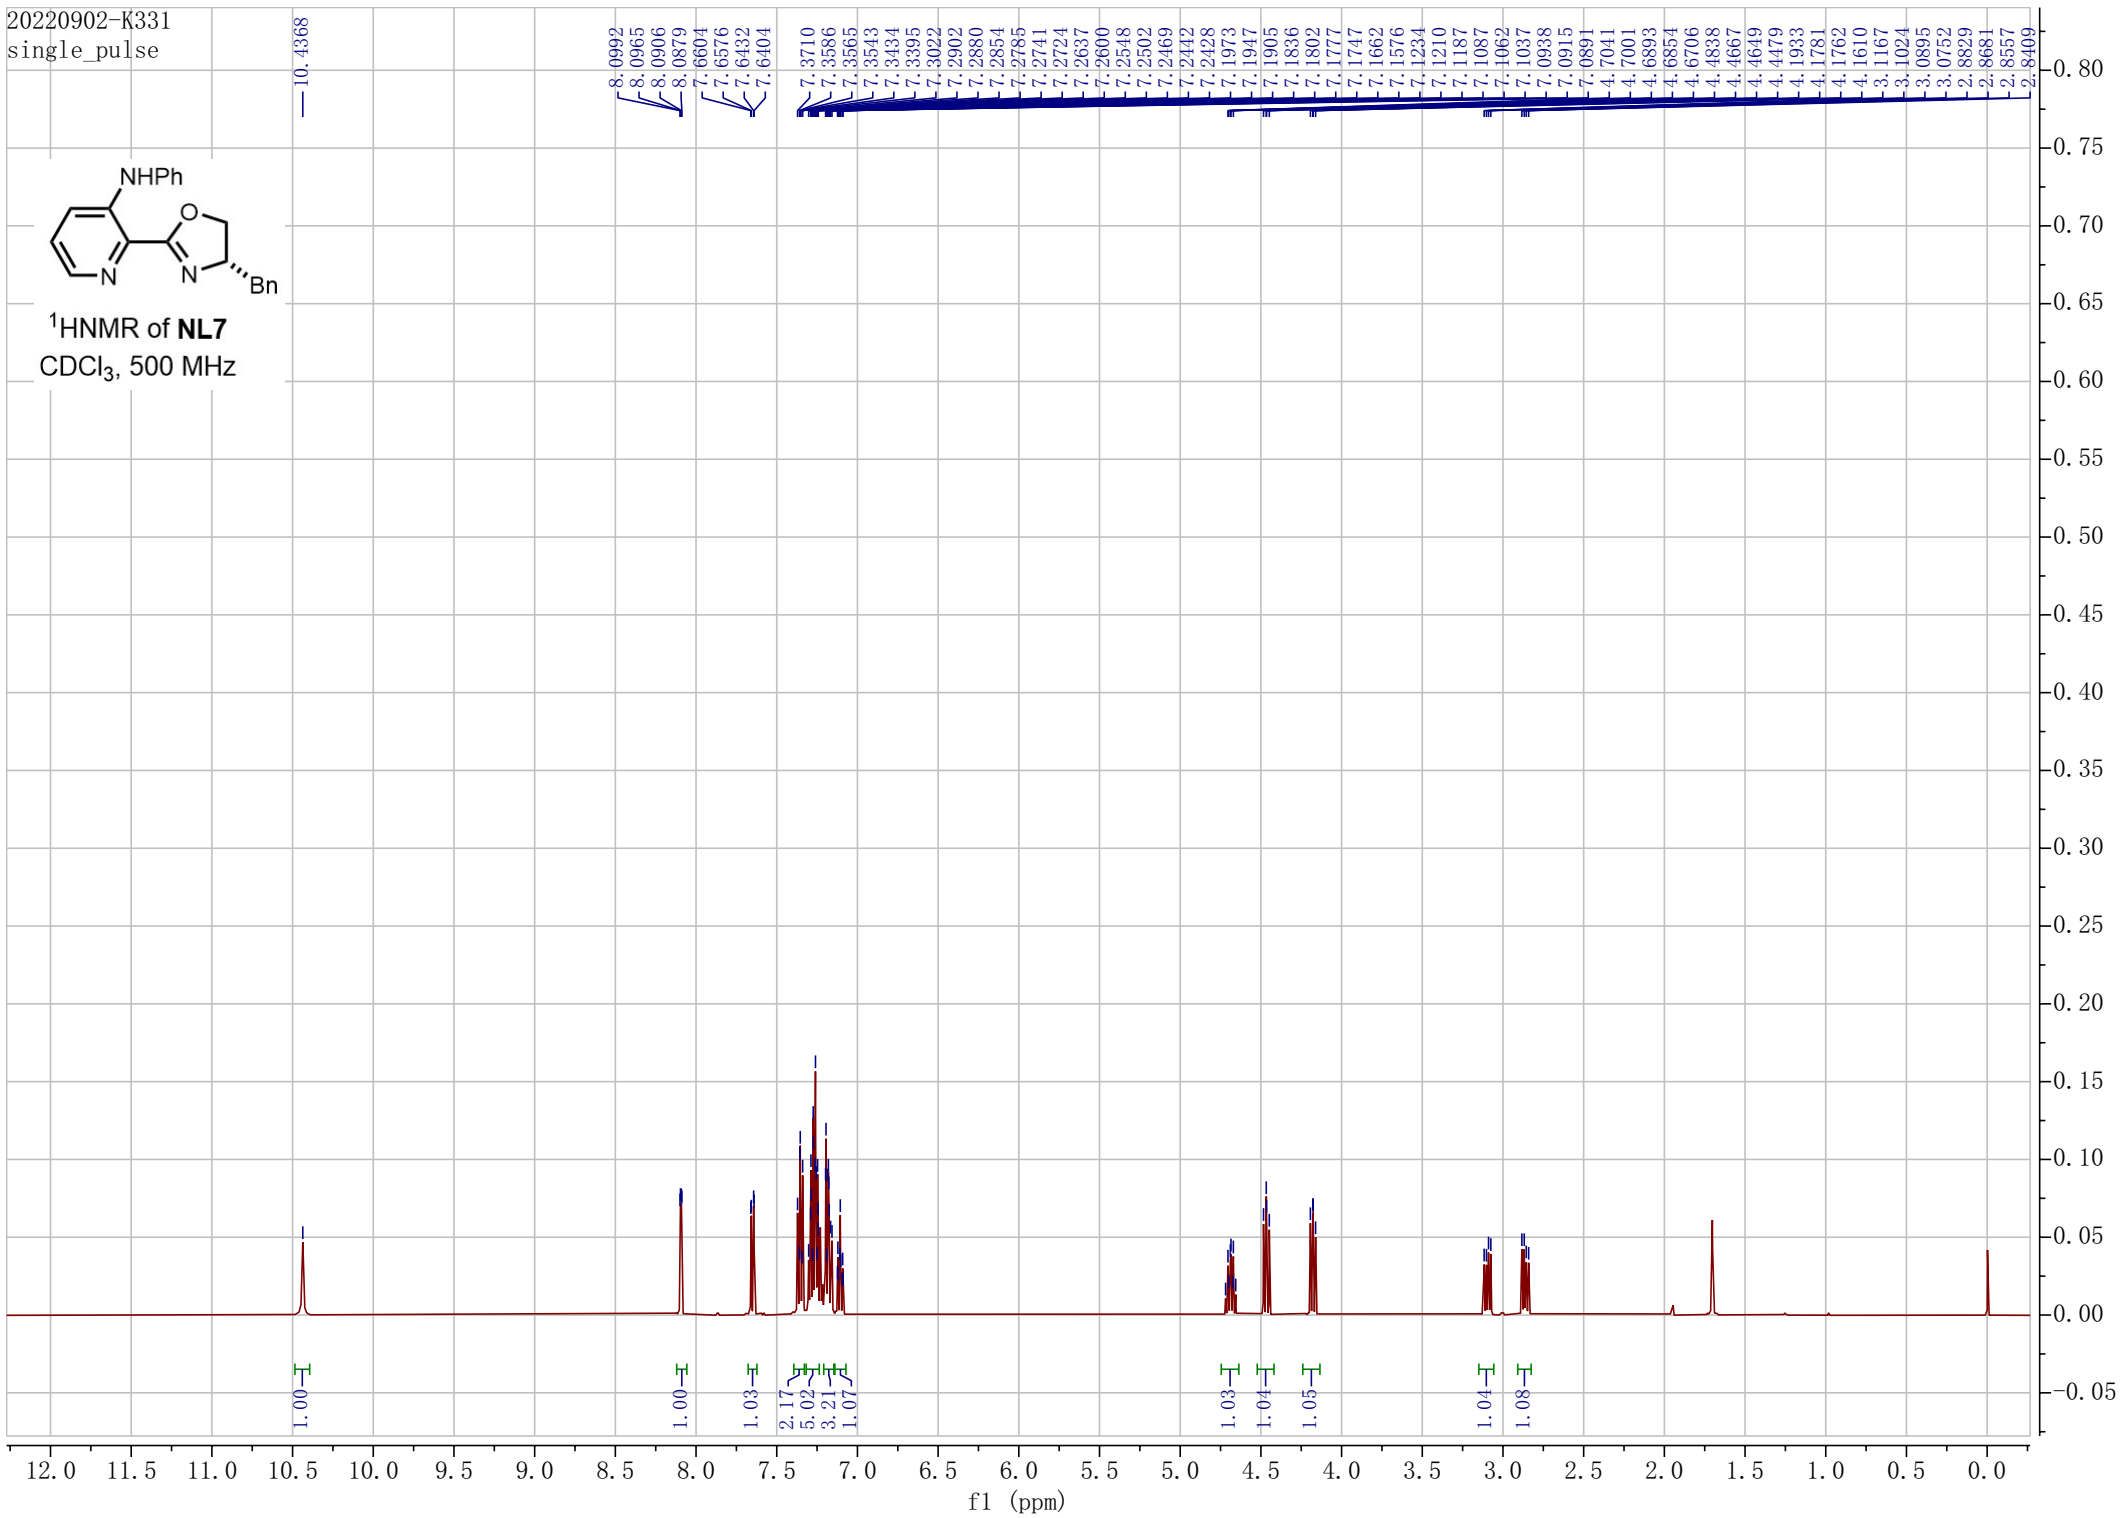

20220902-K331  
single pulse decoupled gated NOE

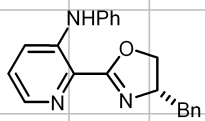

<sup>13</sup>C NMR of **NL7**  
126 MHz, CDCl<sub>3</sub>

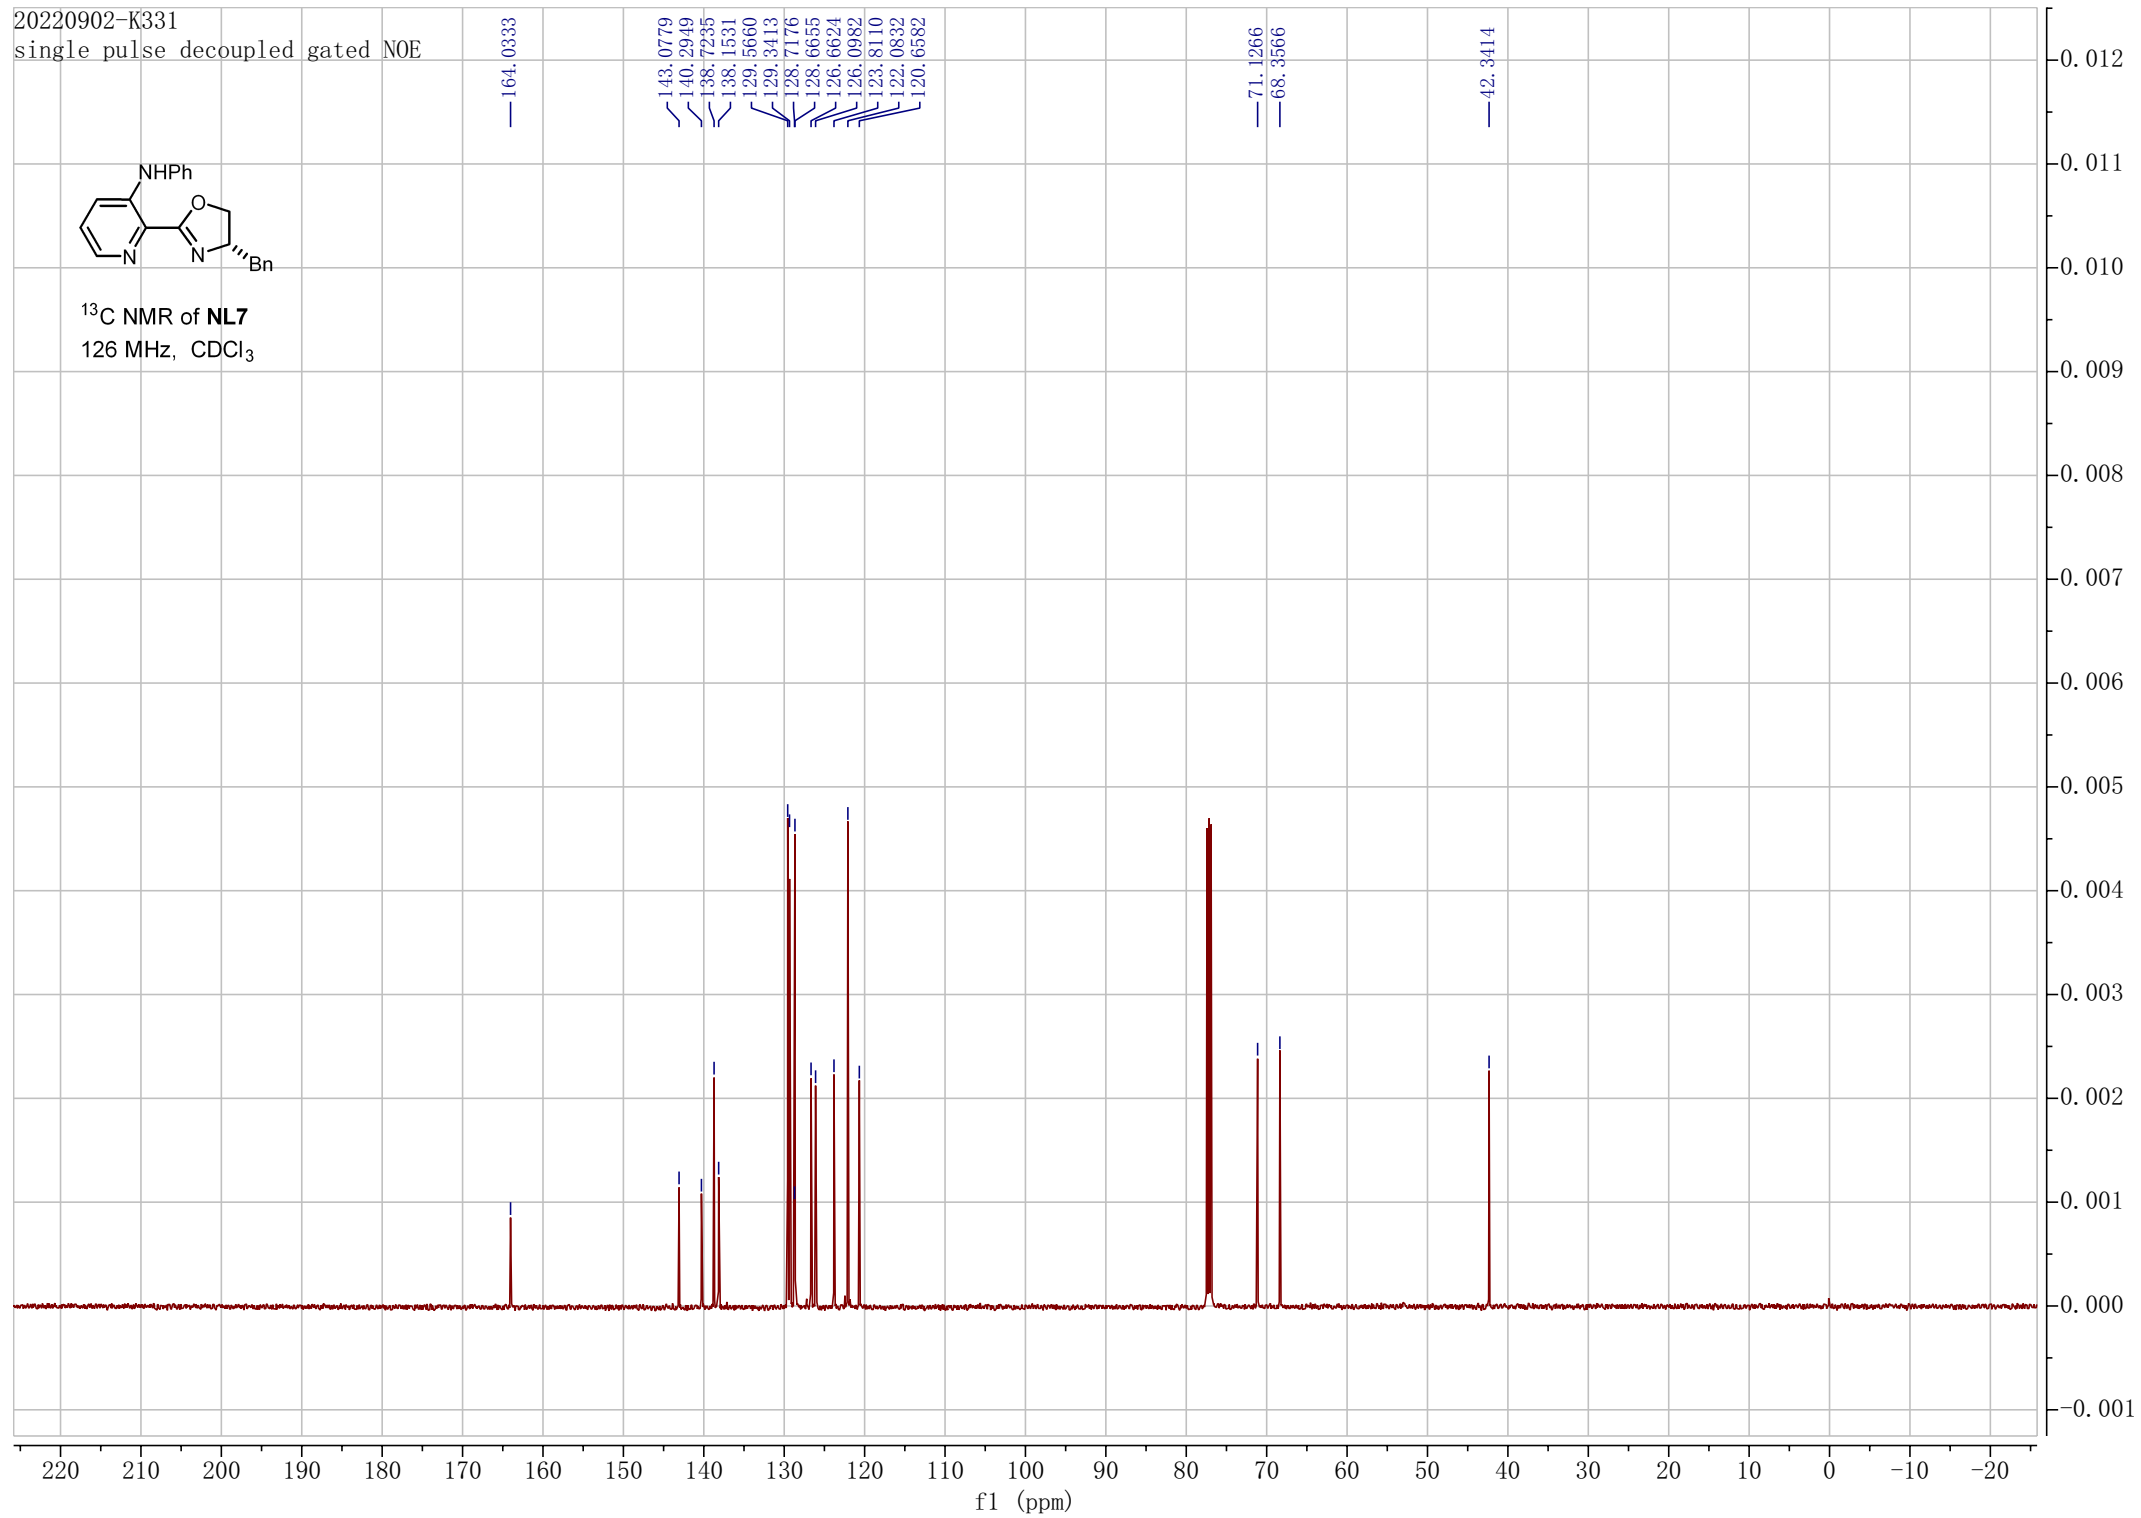



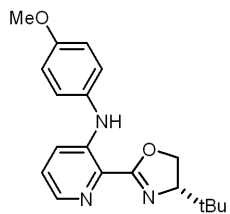

<sup>1</sup>H NMR of **NL8**  
500 MHz, CDCl<sub>3</sub>

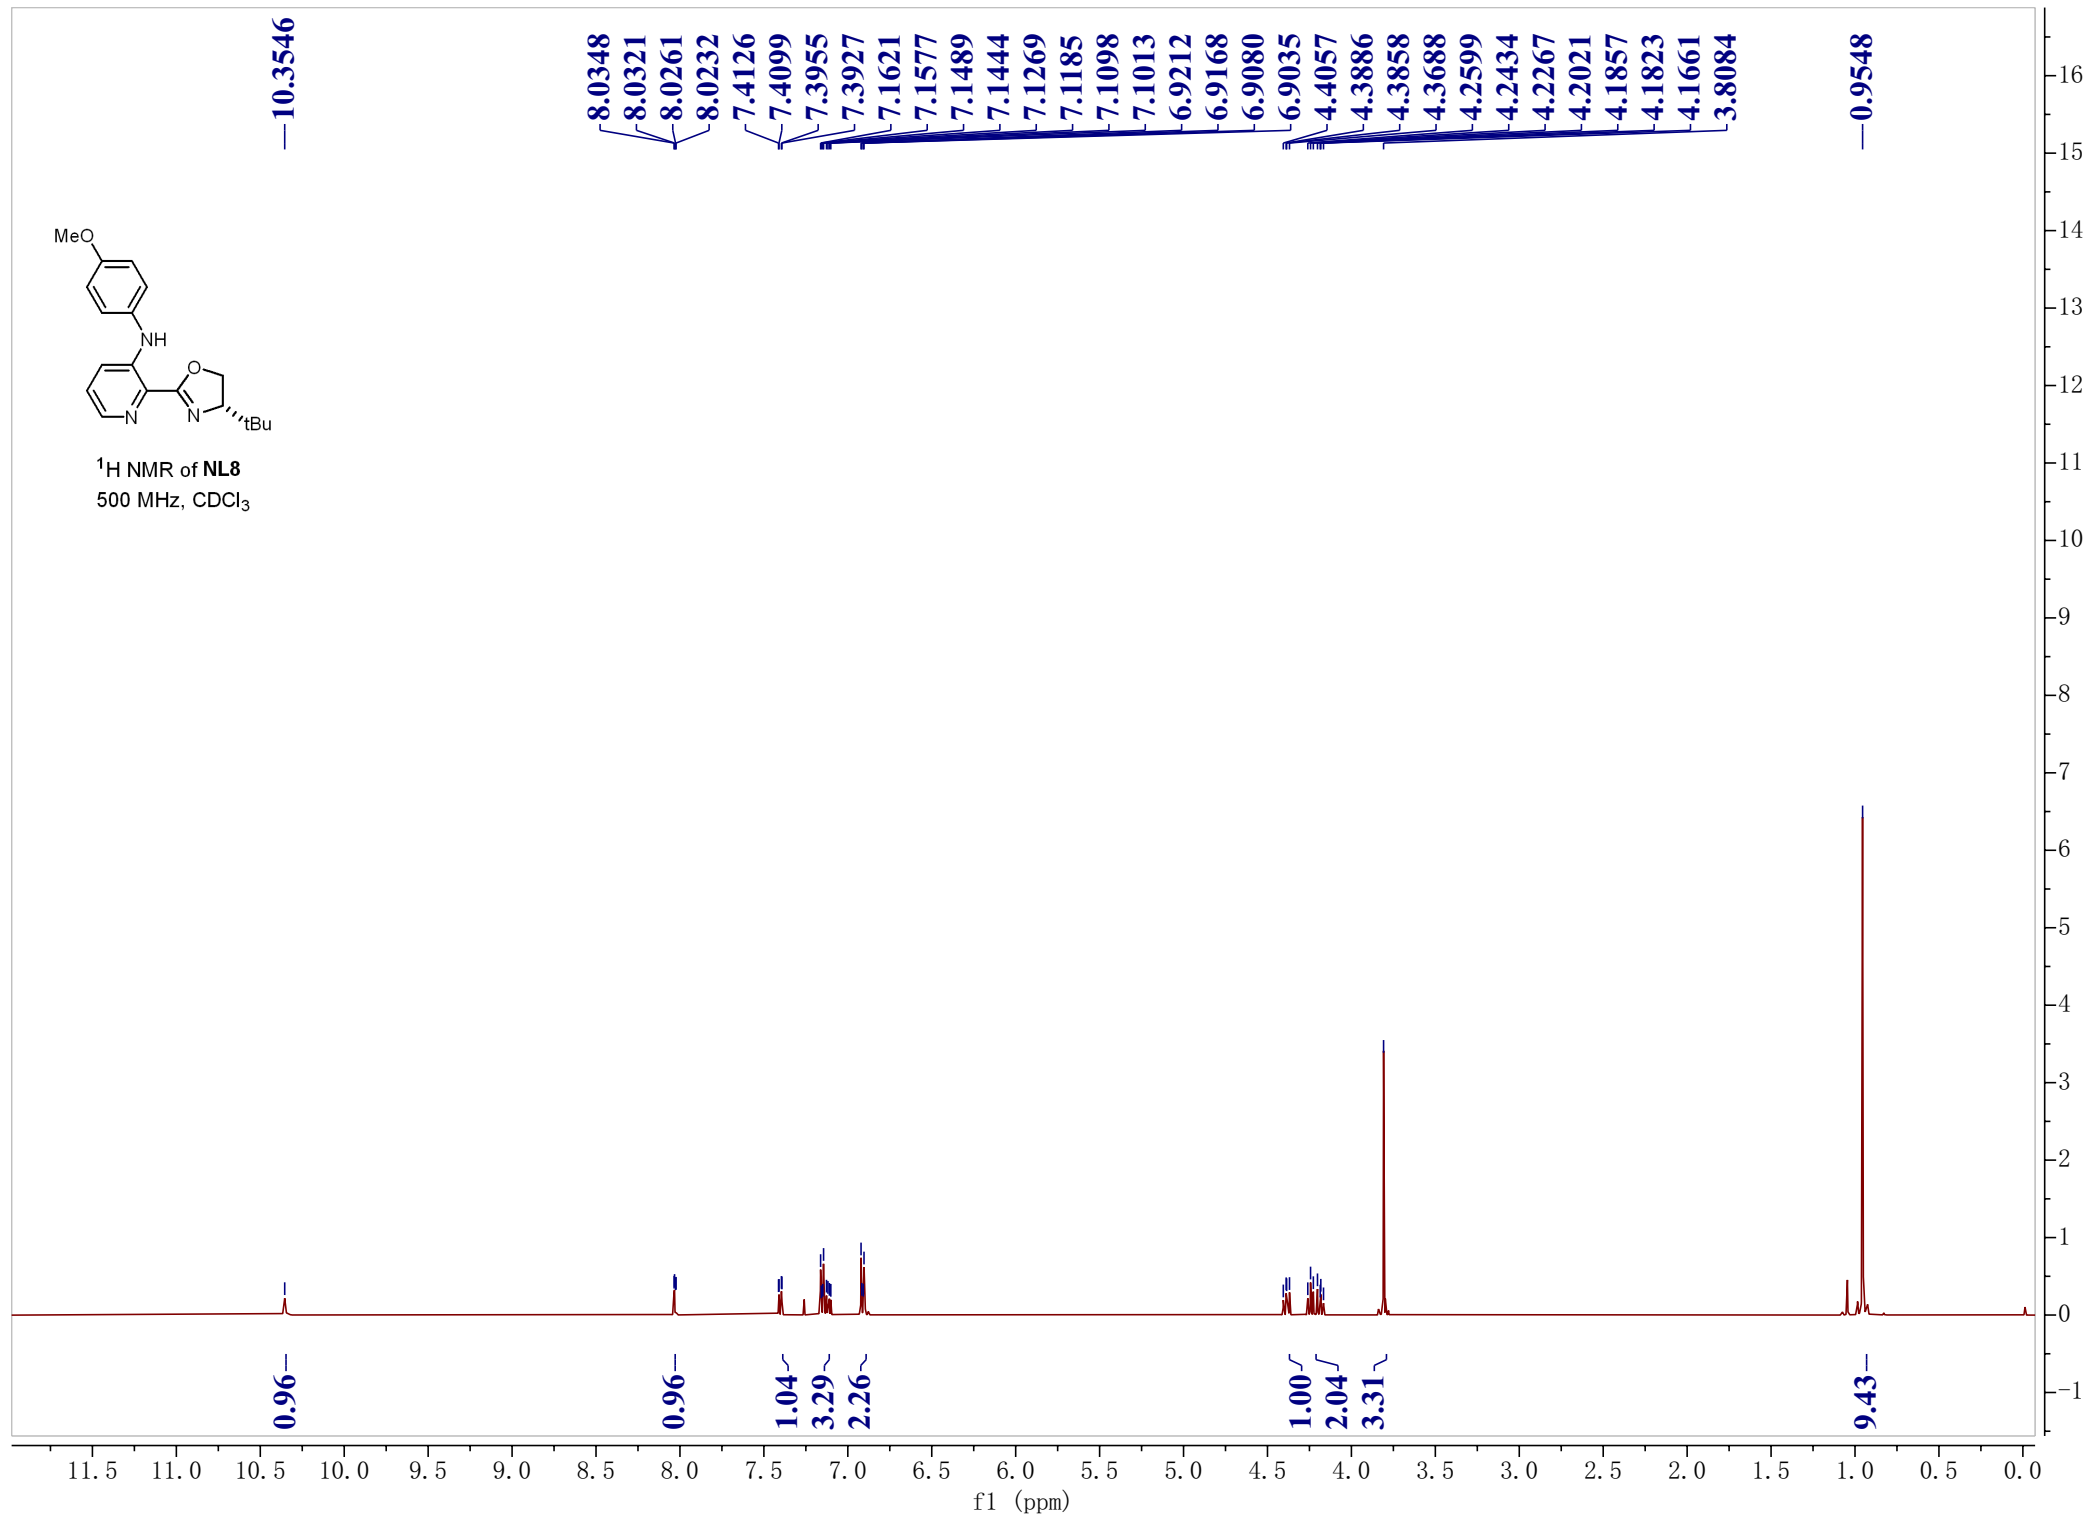

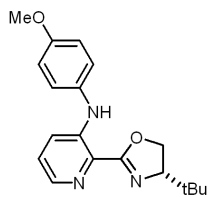

<sup>13</sup>C NMR of **NL8**  
126 MHz, CDCl<sub>3</sub>

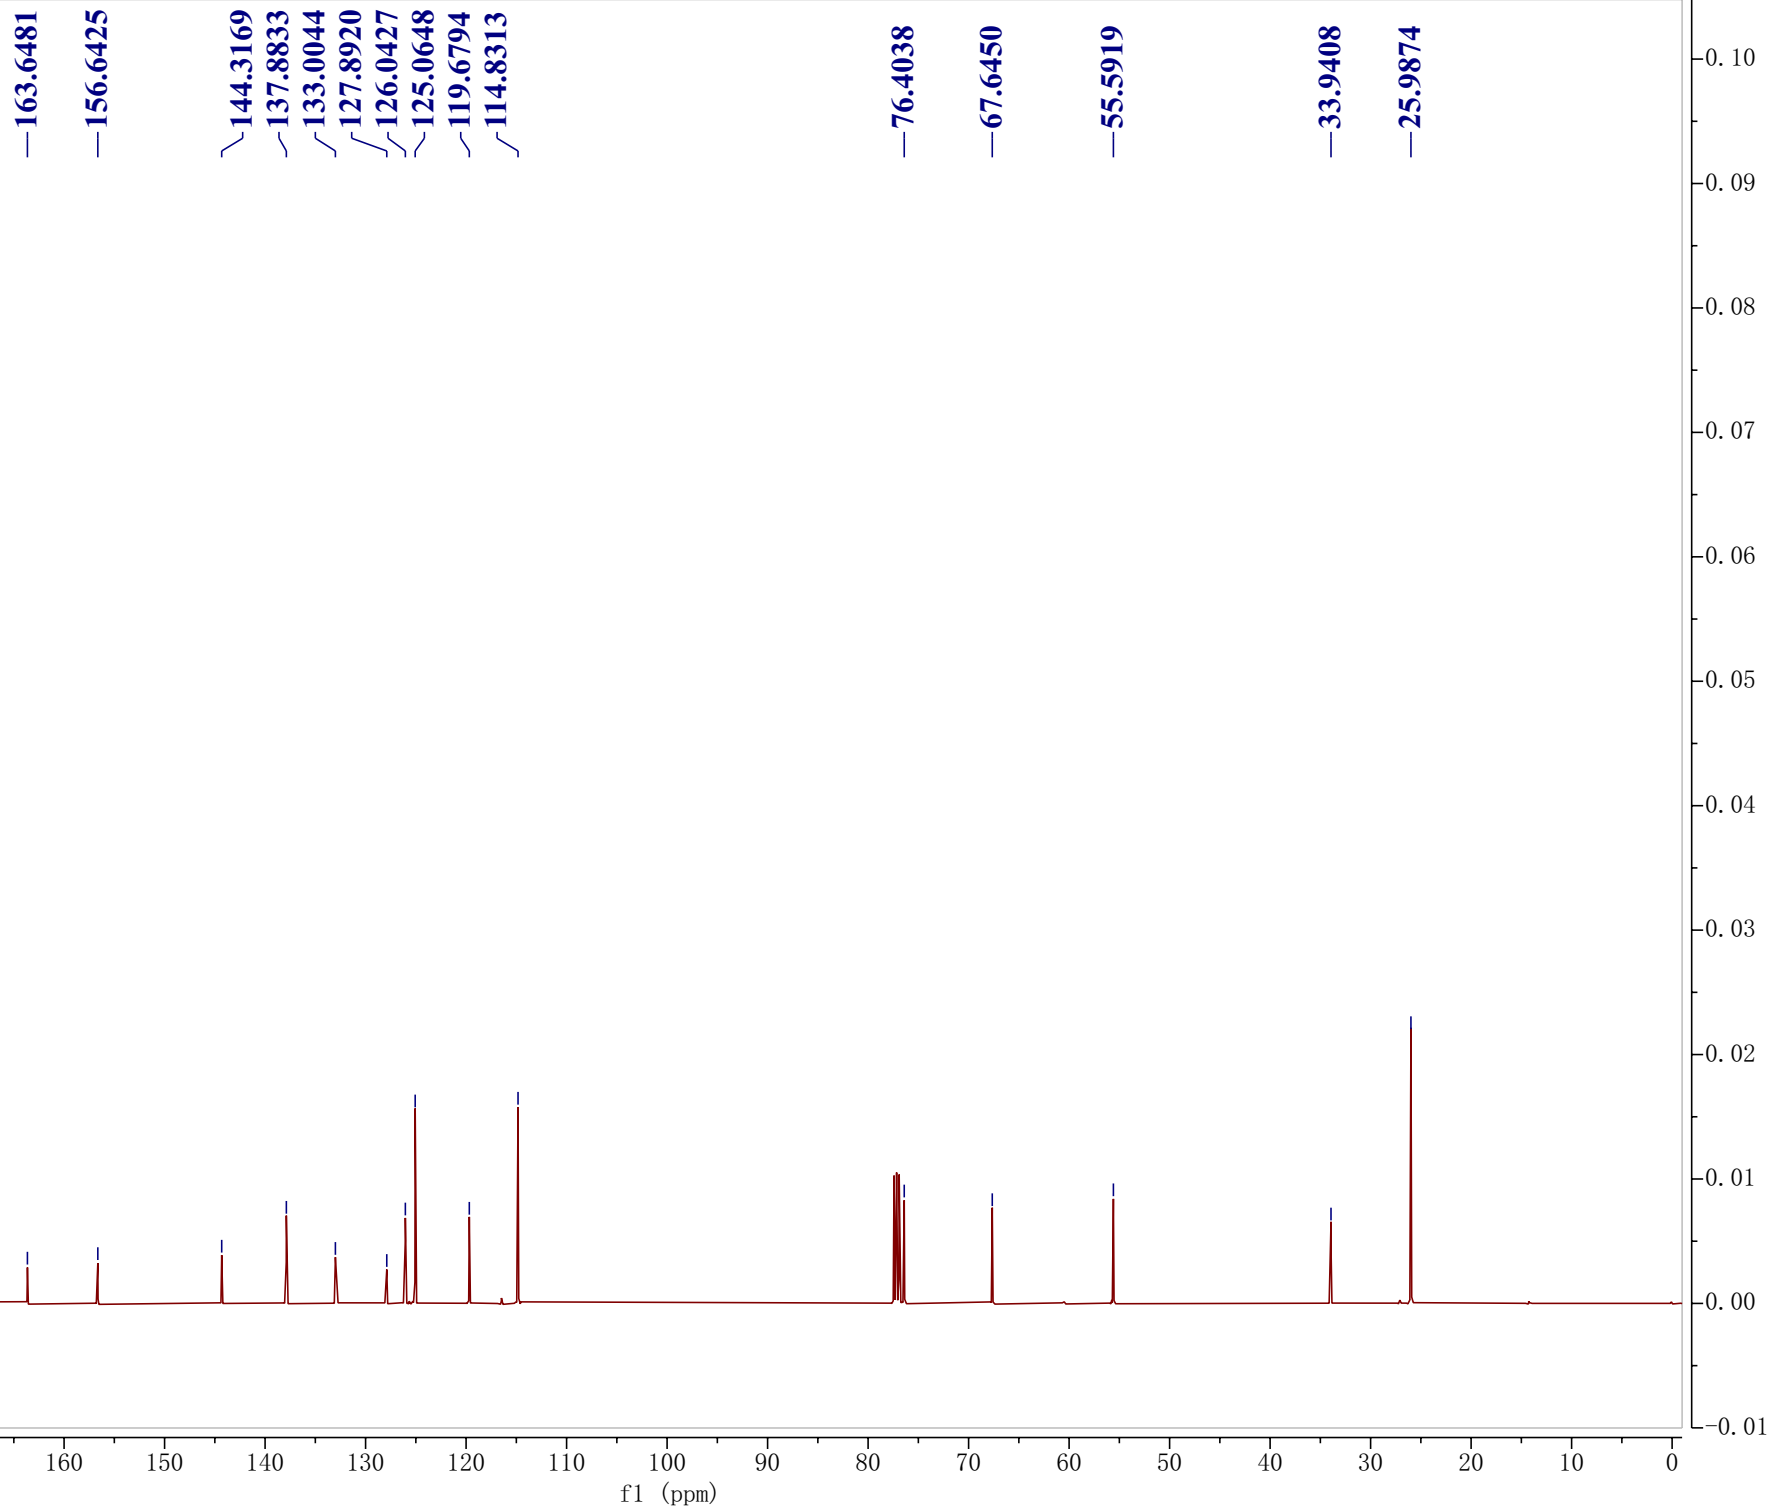

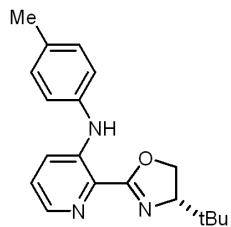

<sup>1</sup>H NMR of **NL9**  
500 MHz, CDCl<sub>3</sub>

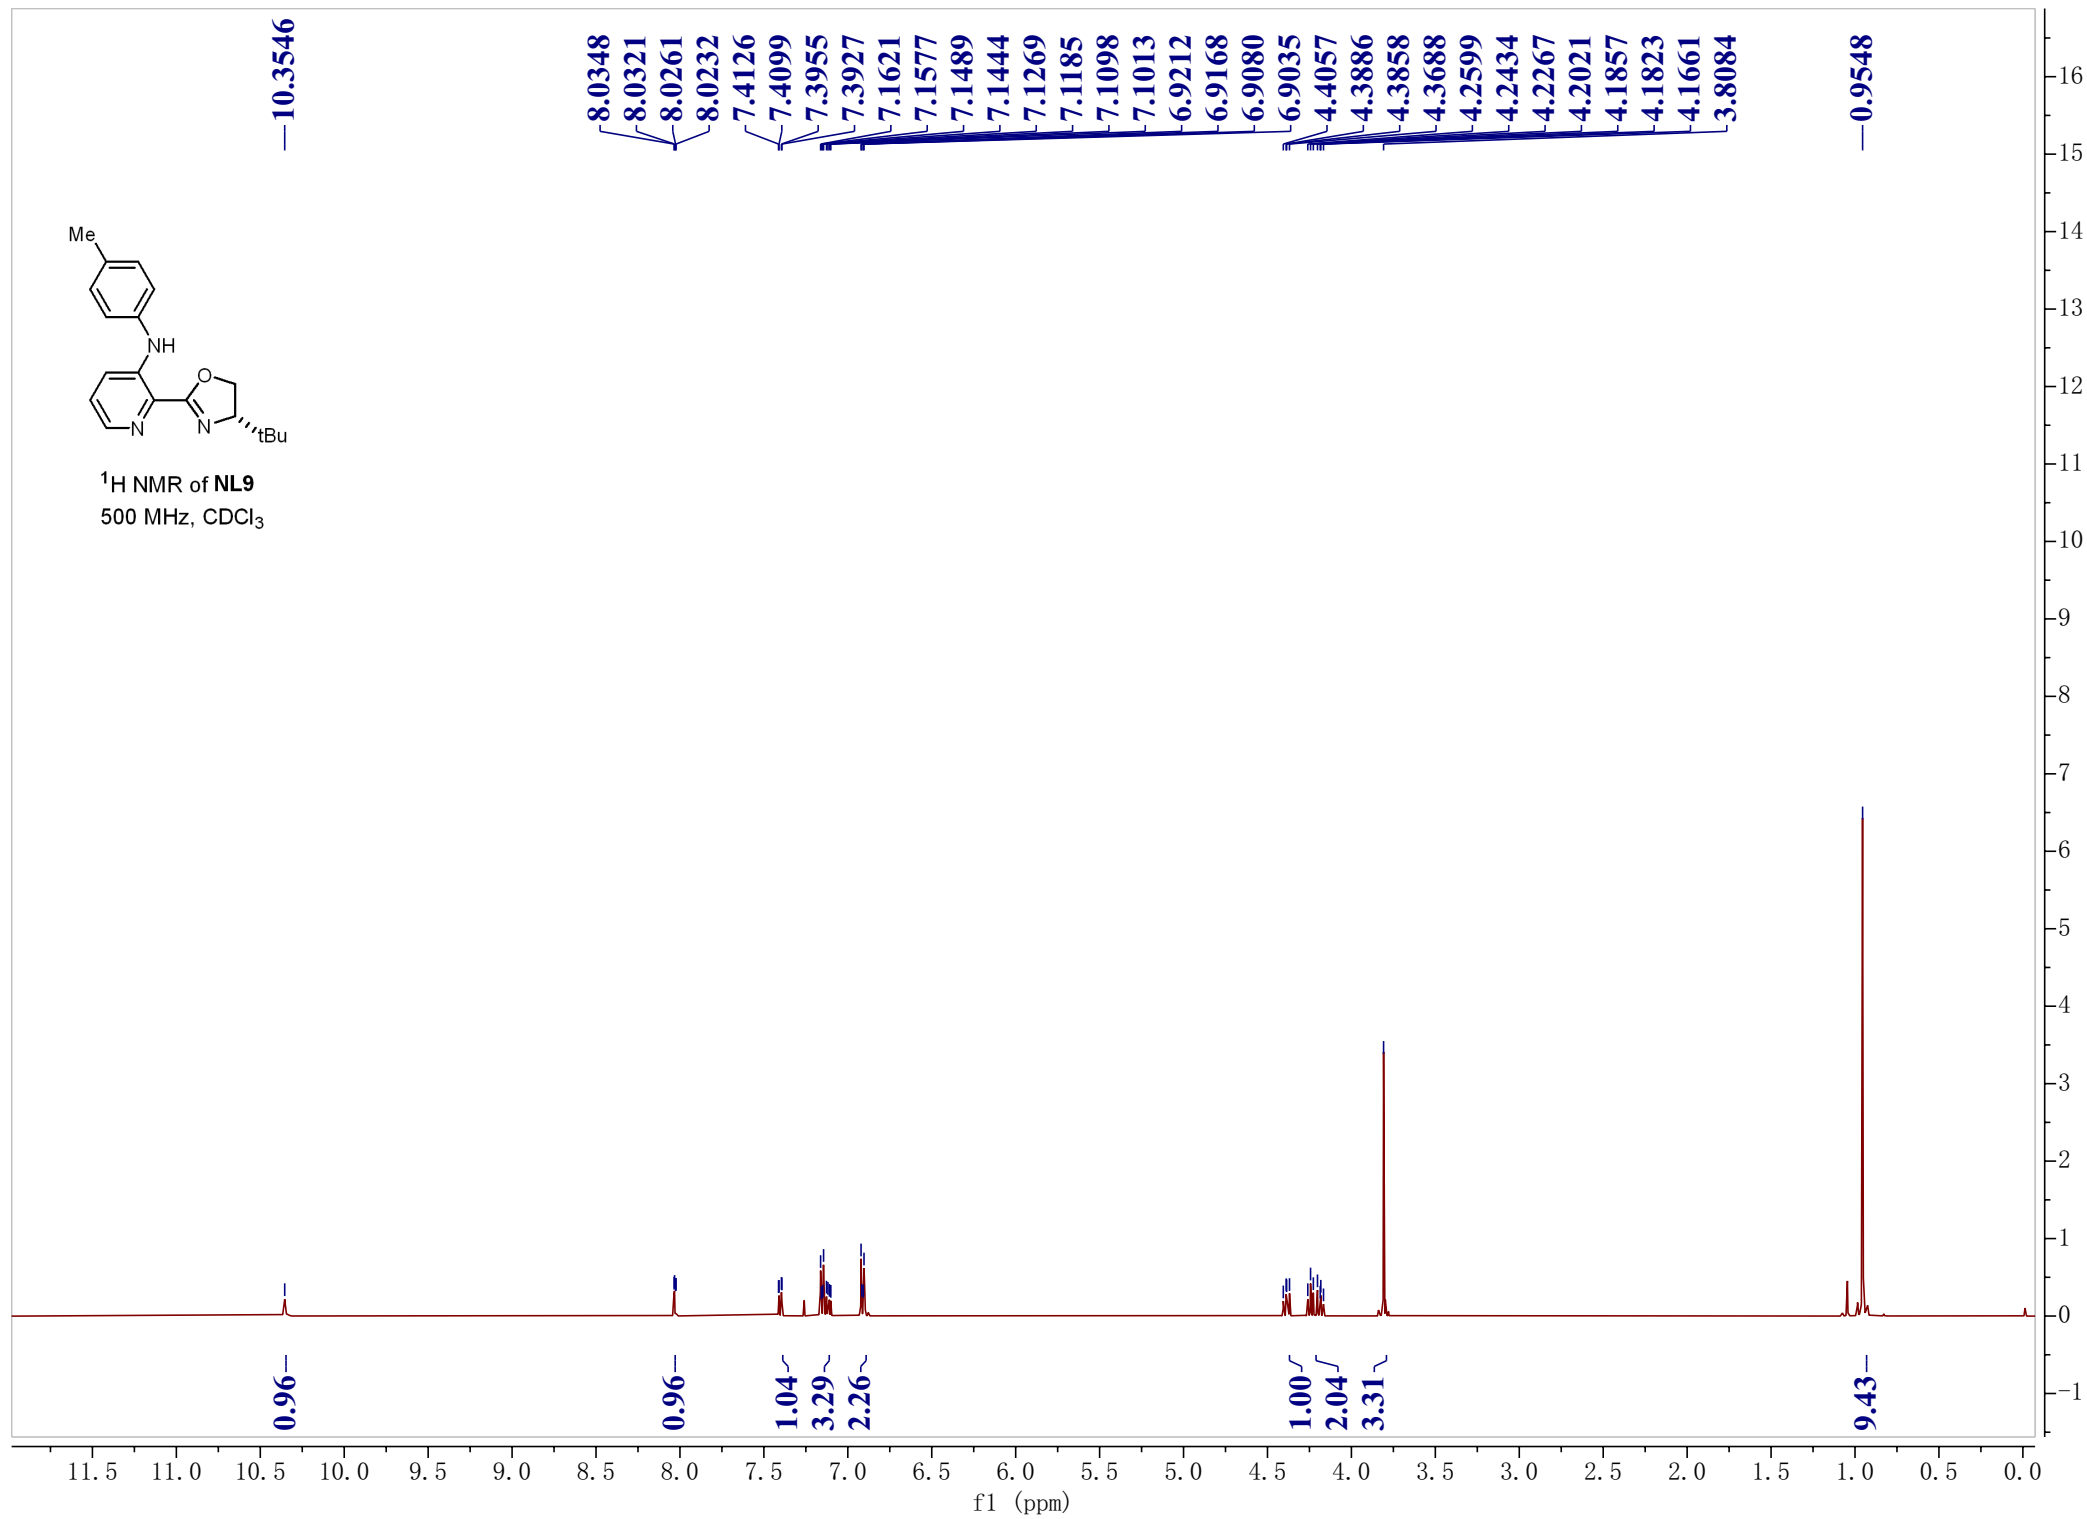

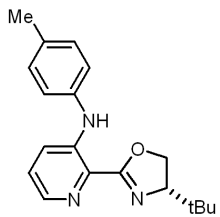

<sup>13</sup>C NMR of **NL9**  
126 MHz, CDCl<sub>3</sub>

—163.5886

143.4534

138.2071

137.5880

133.5213

130.1433

128.3298

125.9674

122.3713

120.0548

—76.4093

—67.6686

—33.9379

—25.9846

—20.9510

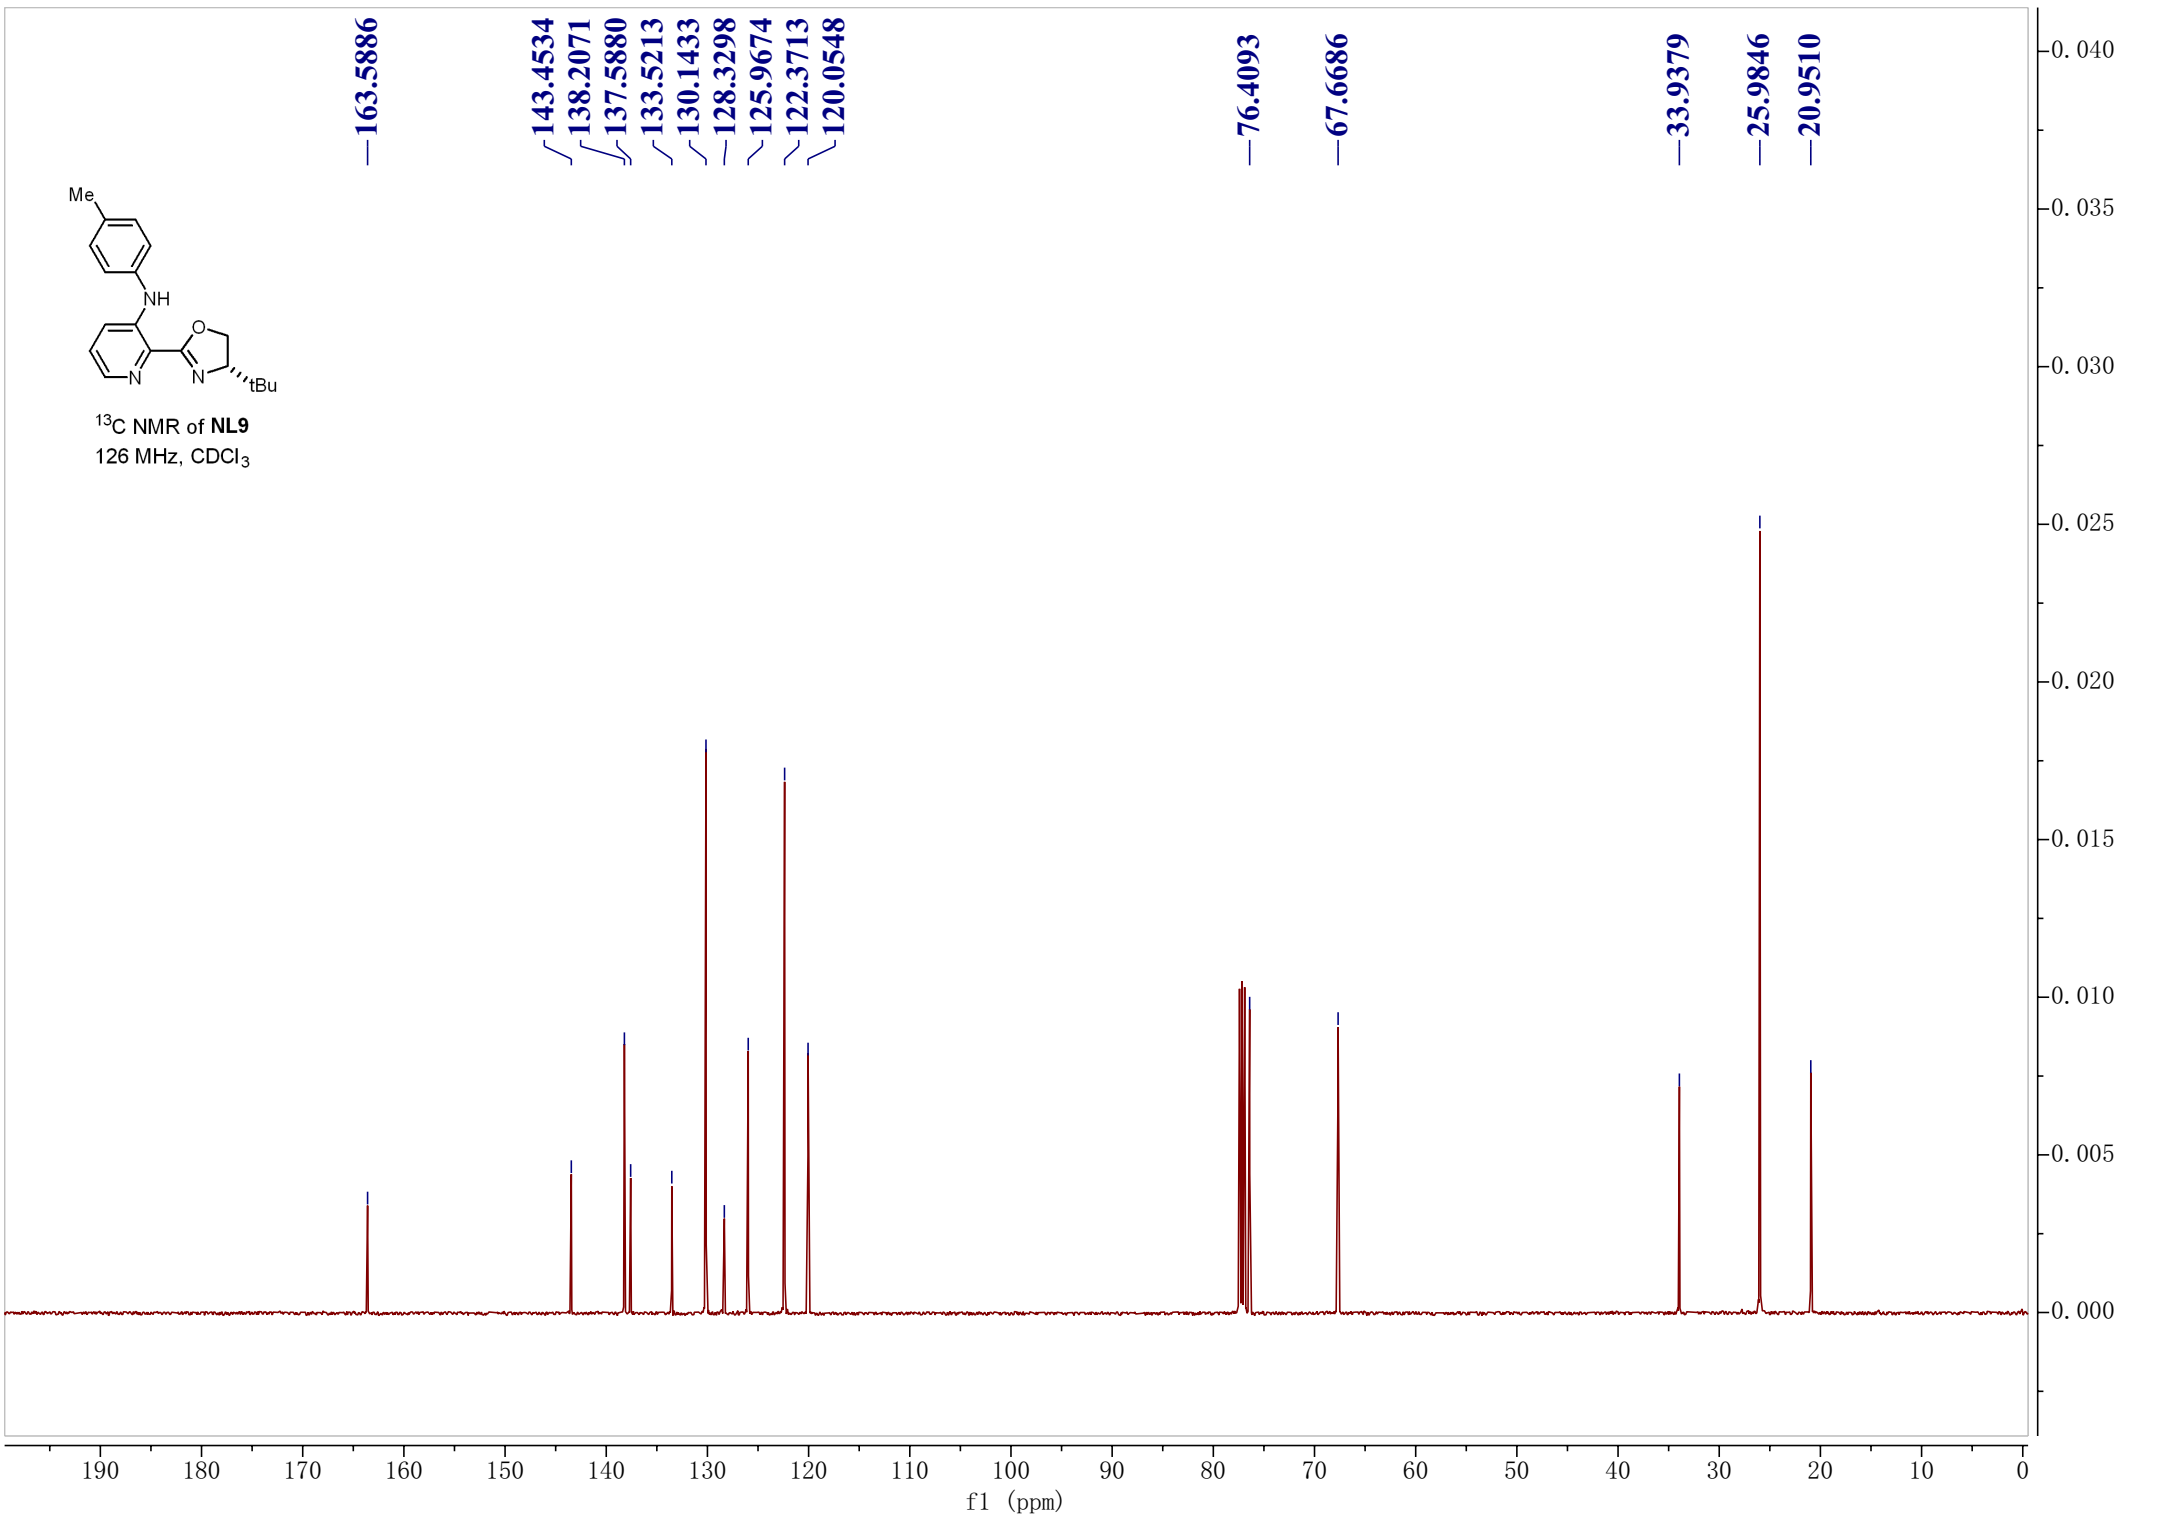

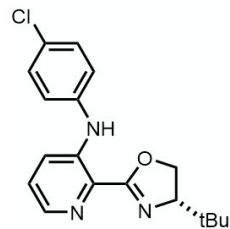

<sup>1</sup>HNMR of **NL10**  
CDCl<sub>3</sub>, 500 MHz

10.2492

8.4806  
8.4617  
7.9139  
7.9105  
7.9055  
7.9024  
7.5477  
7.5450  
7.5305  
7.5278  
7.2773  
7.2732  
7.2642  
7.2600  
7.2448  
7.1999  
7.1912  
7.1827  
7.1740  
7.1254  
7.1211  
7.1122  
7.1080  
3.9692  
3.9628  
3.9566  
3.9448  
3.9414  
3.9381  
3.9257  
3.9193  
3.6722  
3.6699  
3.6538  
3.6487  
3.6337  
3.6303  
1.0241

0.93

0.91

0.94

1.00

2.05

1.07

2.08

2.05

1.03

9.00

11.5 11.0 10.5 10.0 9.5 9.0 8.5 8.0 7.5 7.0 6.5 6.0 5.5 5.0 4.5 4.0 3.5 3.0 2.5 2.0 1.5 1.0 0.5 0.0

f1 (ppm)

5.0  
4.5  
4.0  
3.5  
3.0  
2.5  
2.0  
1.5  
1.0  
0.5  
0.0  
-0.5

20220909-K413

single pulse decoupled gated NOE

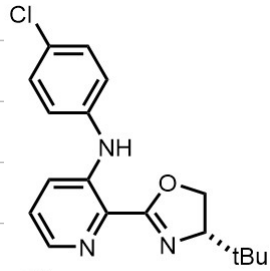

<sup>13</sup>CNMR of **NL10**

CDCl<sub>3</sub>, 126 MHz

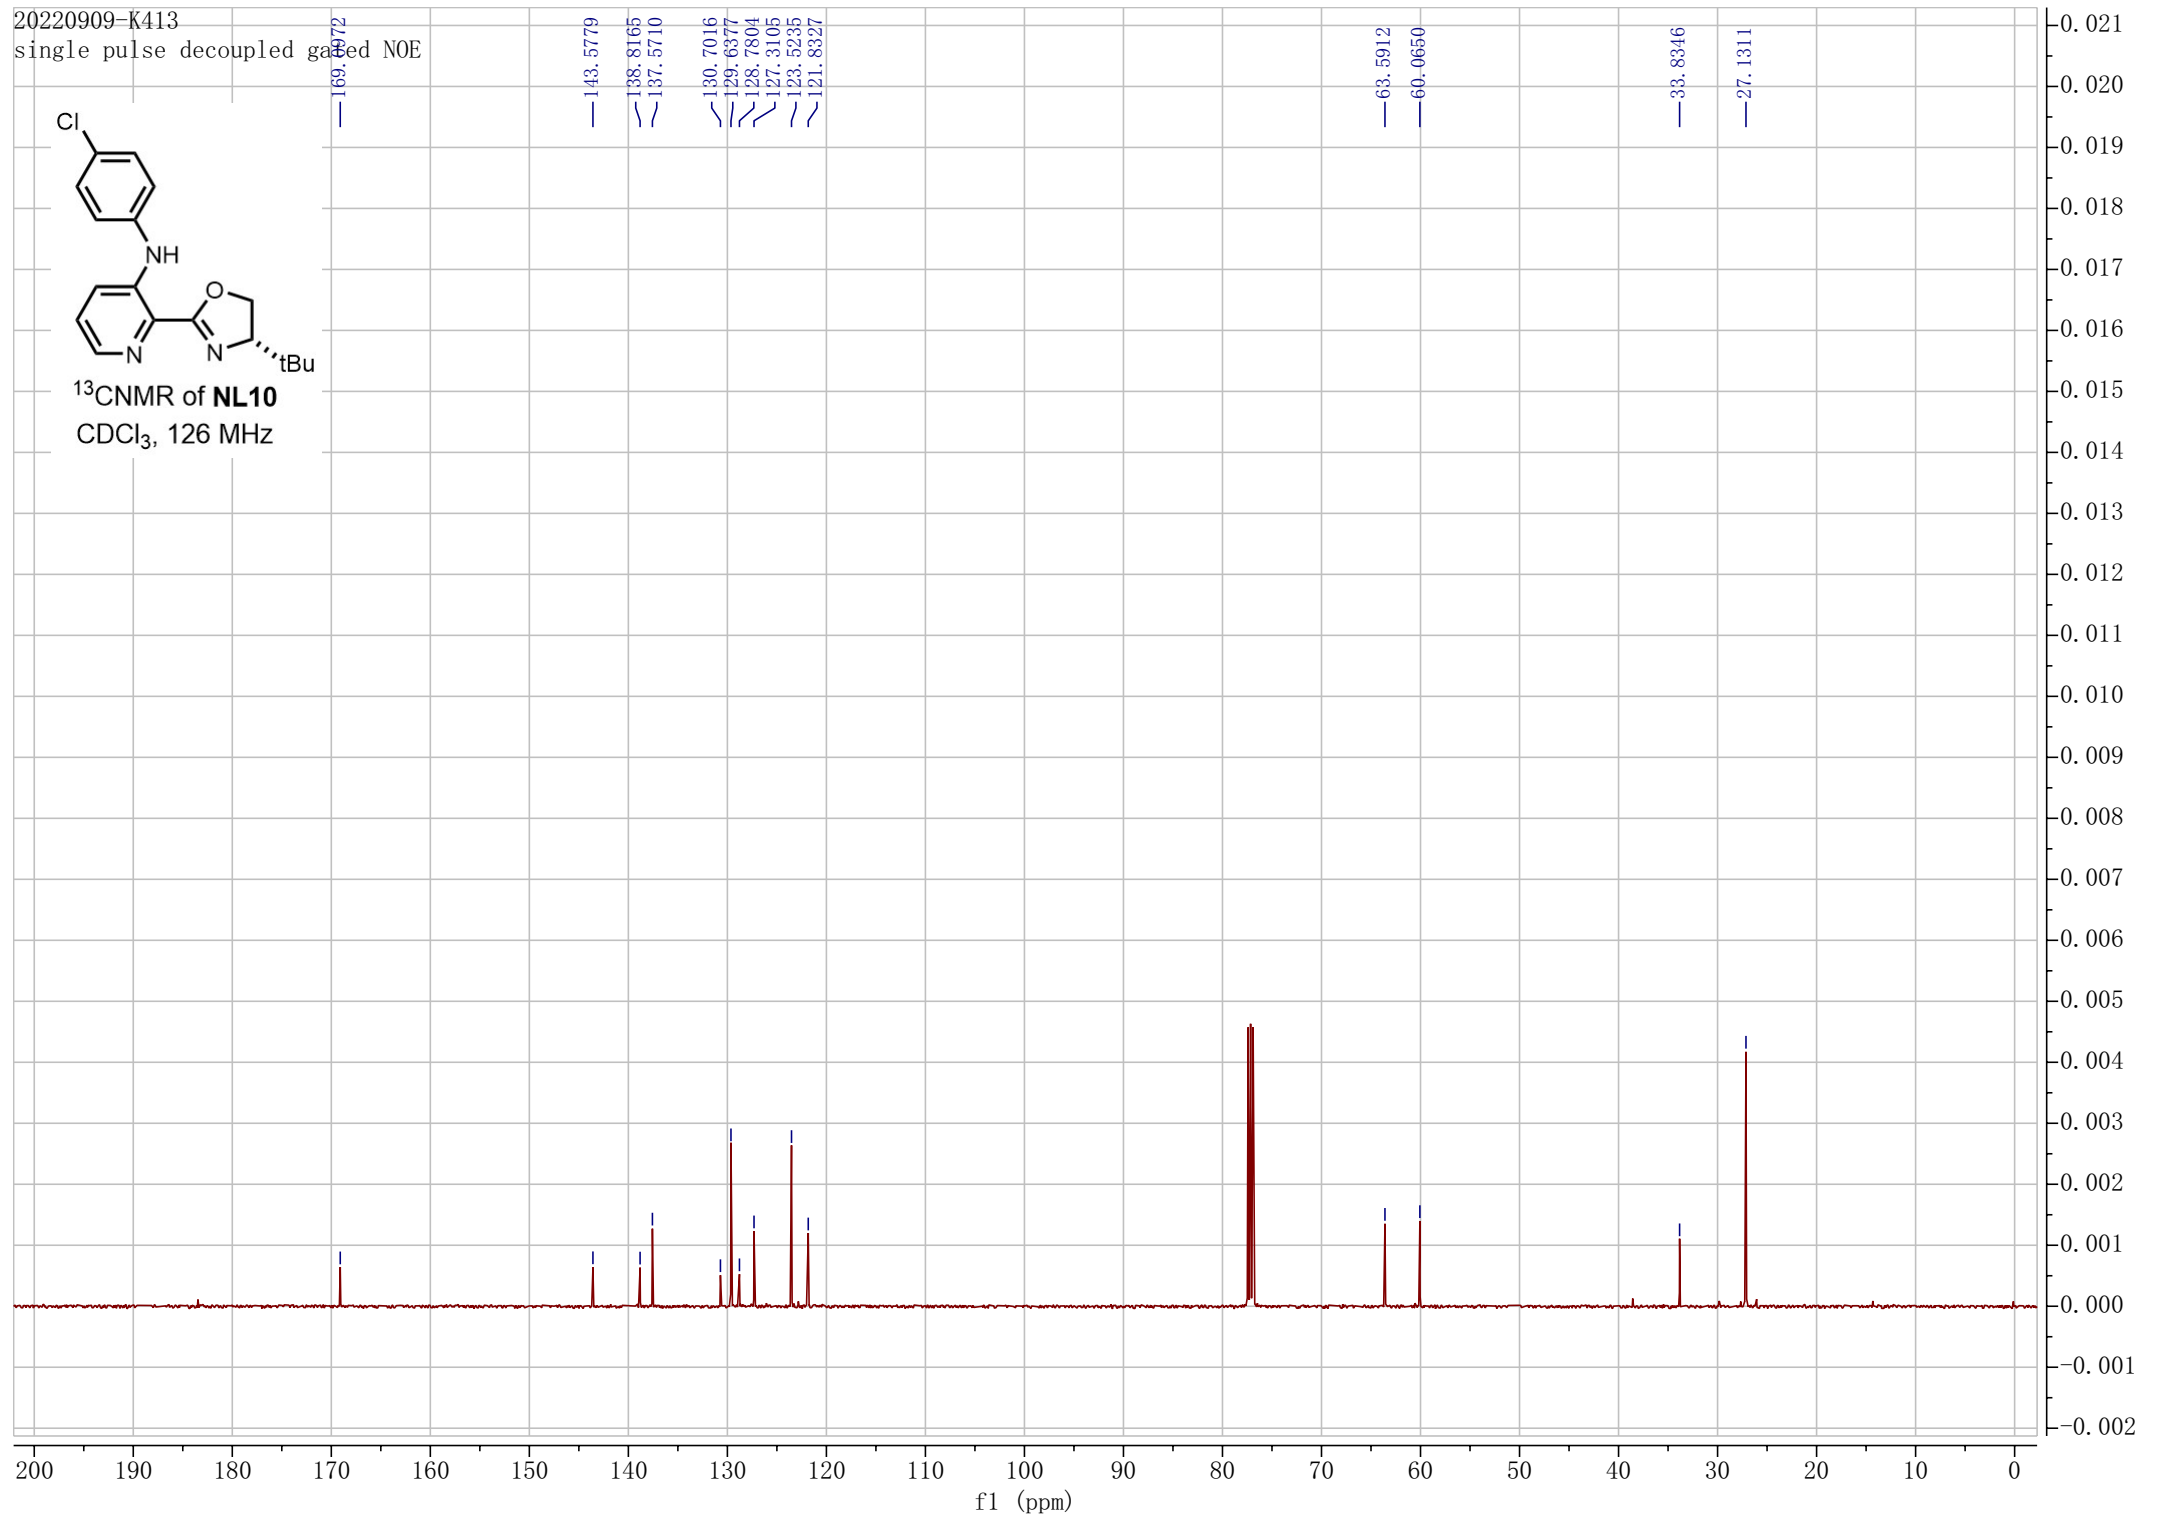

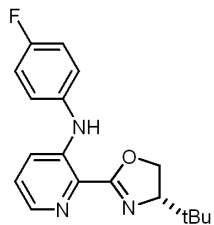

<sup>1</sup>H NMR of **NL11**  
400 MHz, CDCl<sub>3</sub>

7.5536  
7.5387  
7.5369  
7.5226  
7.5059  
7.5039  
7.4913  
7.4888  
7.2269  
7.2227  
7.2185  
7.2092  
7.0572  
7.0404  
7.0228  
6.8678  
6.8657  
6.8513  
6.8492  
6.7048  
4.4413  
4.4238  
4.4207  
4.4034  
4.3141  
4.2974  
4.2803  
4.1235  
4.1072  
4.1033  
4.0868  
-0.9733

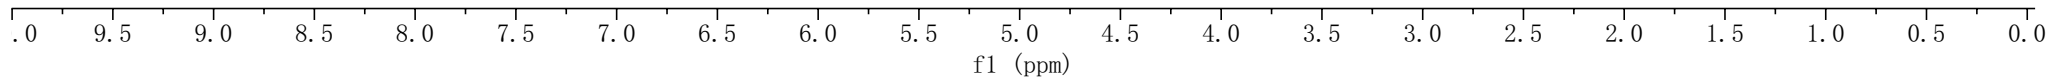

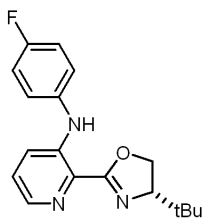

<sup>13</sup>C NMR of **NL11**  
126 MHz, CDCl<sub>3</sub>

162.6935  
160.5115  
158.5813  
156.5217  
145.7412  
138.4455  
136.1104  
136.0901  
123.8749  
123.8109  
116.4297  
116.2507  
115.4694  
109.2613

76.5375

69.3717

34.1544

26.0949

f1 (ppm)

0.010  
0.009  
0.008  
0.007  
0.006  
0.005  
0.004  
0.003  
0.002  
0.001  
0.000  
-0.001



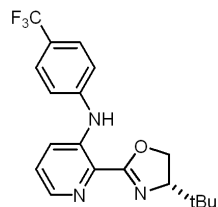

<sup>1</sup>H NMR of **NL12**  
400 MHz, CDCl<sub>3</sub>

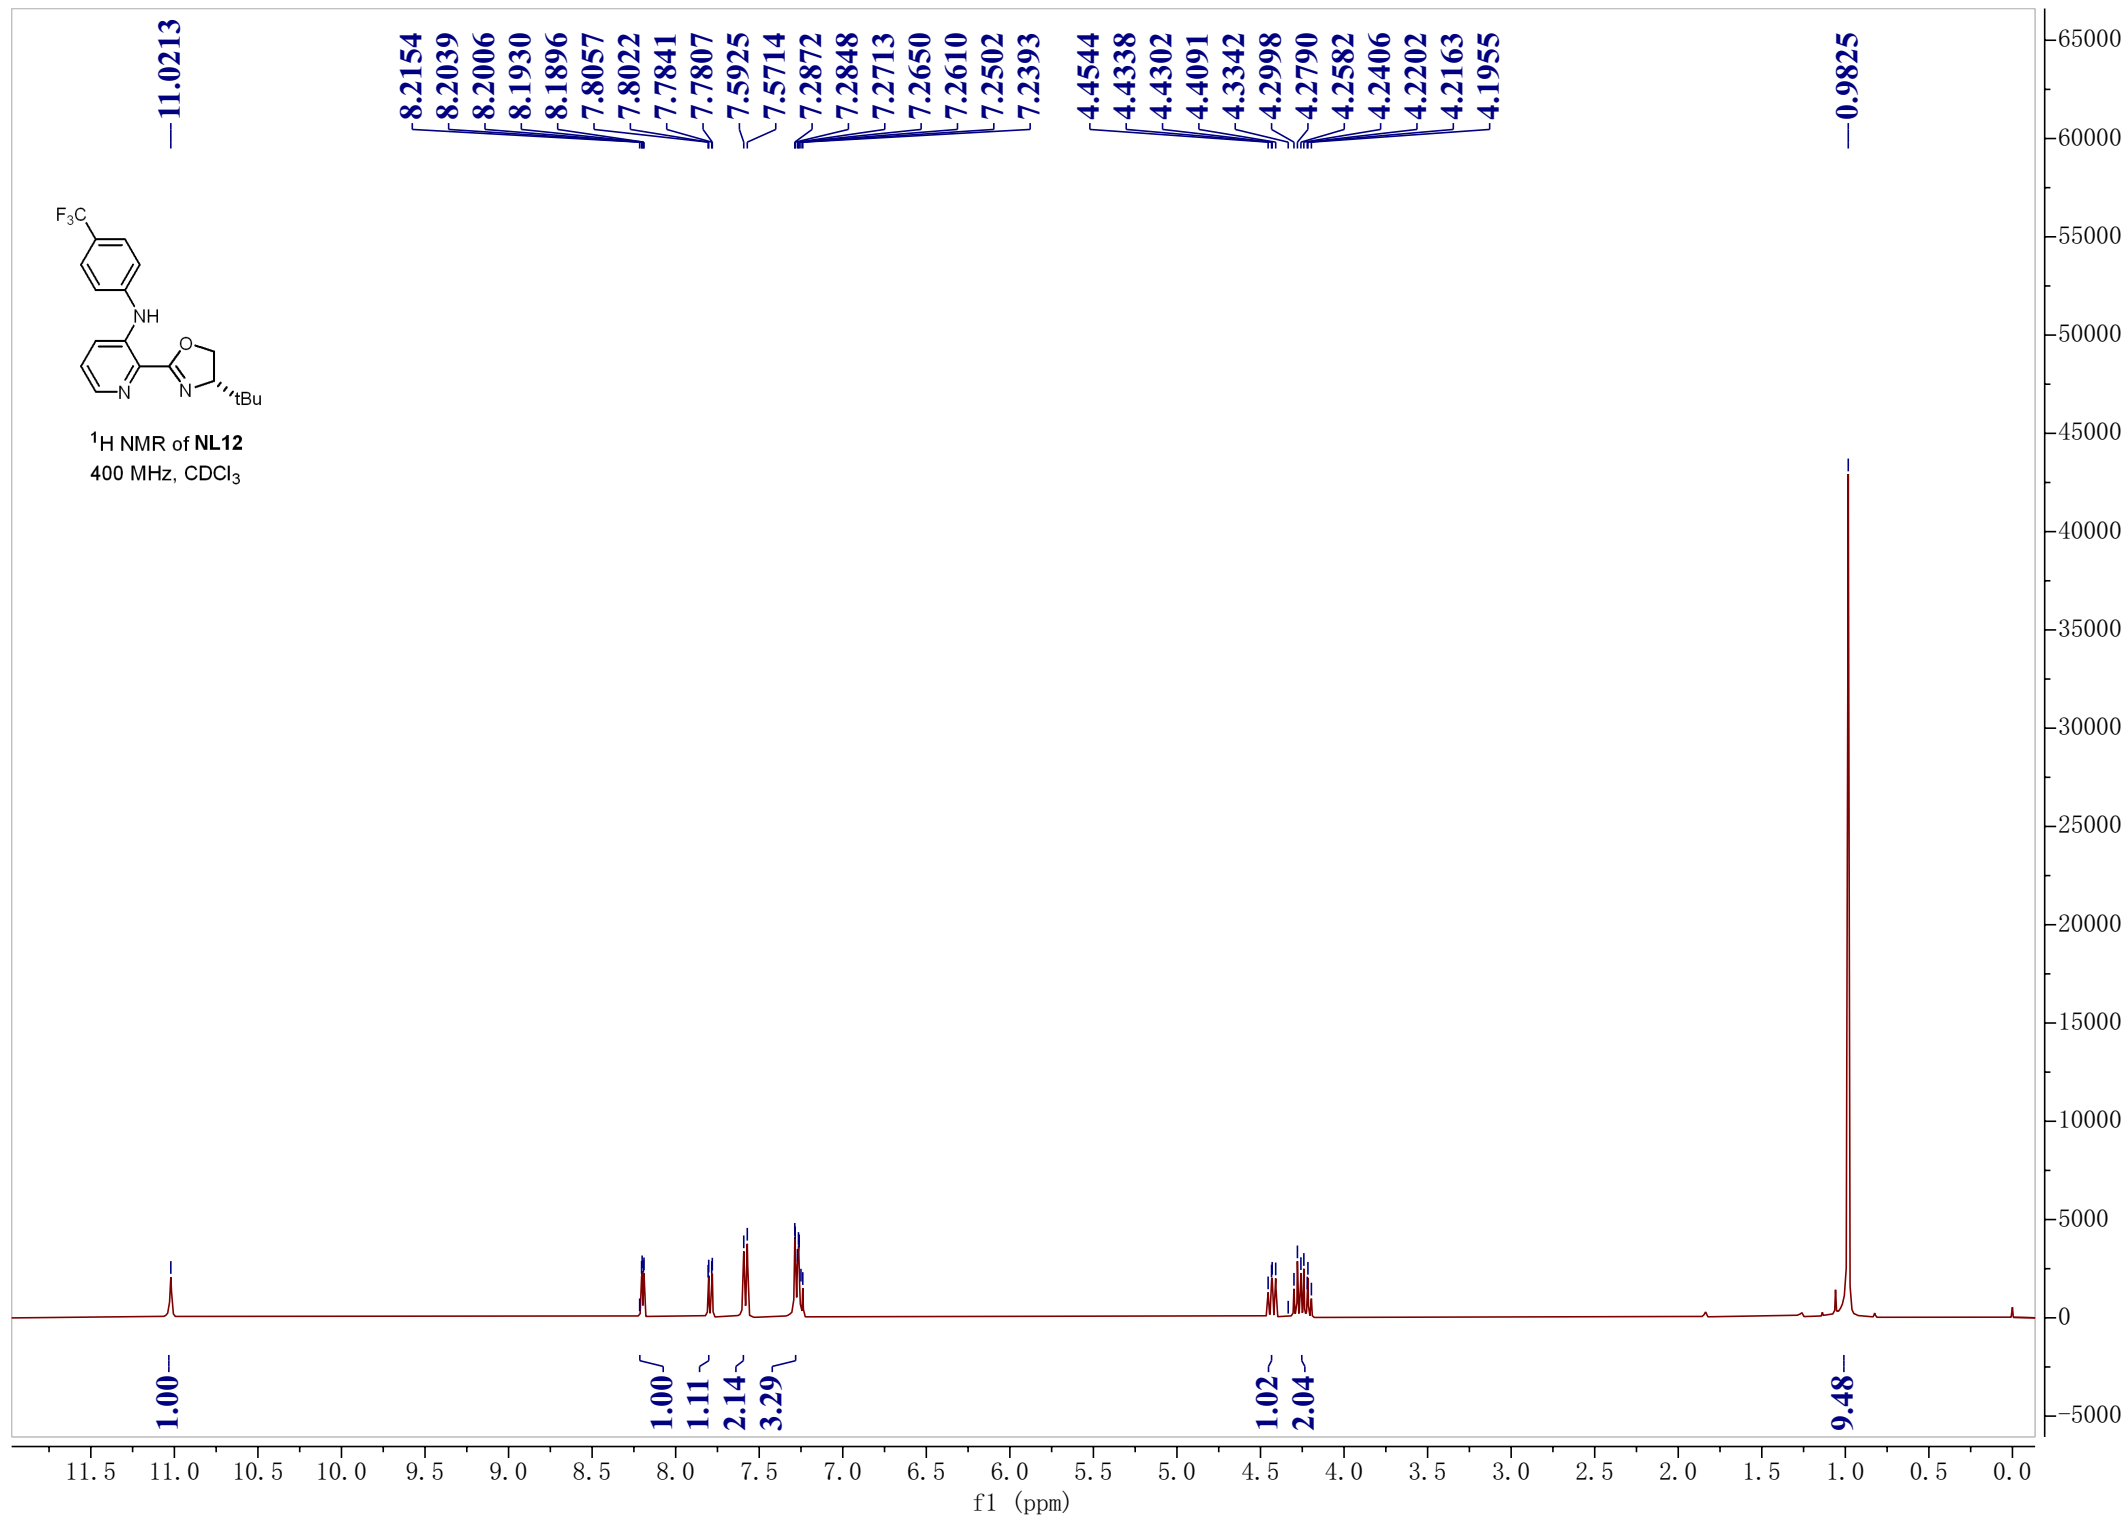

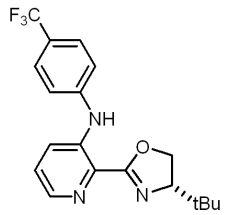

<sup>13</sup>C NMR of NL12  
101 MHz, CDCl<sub>3</sub>

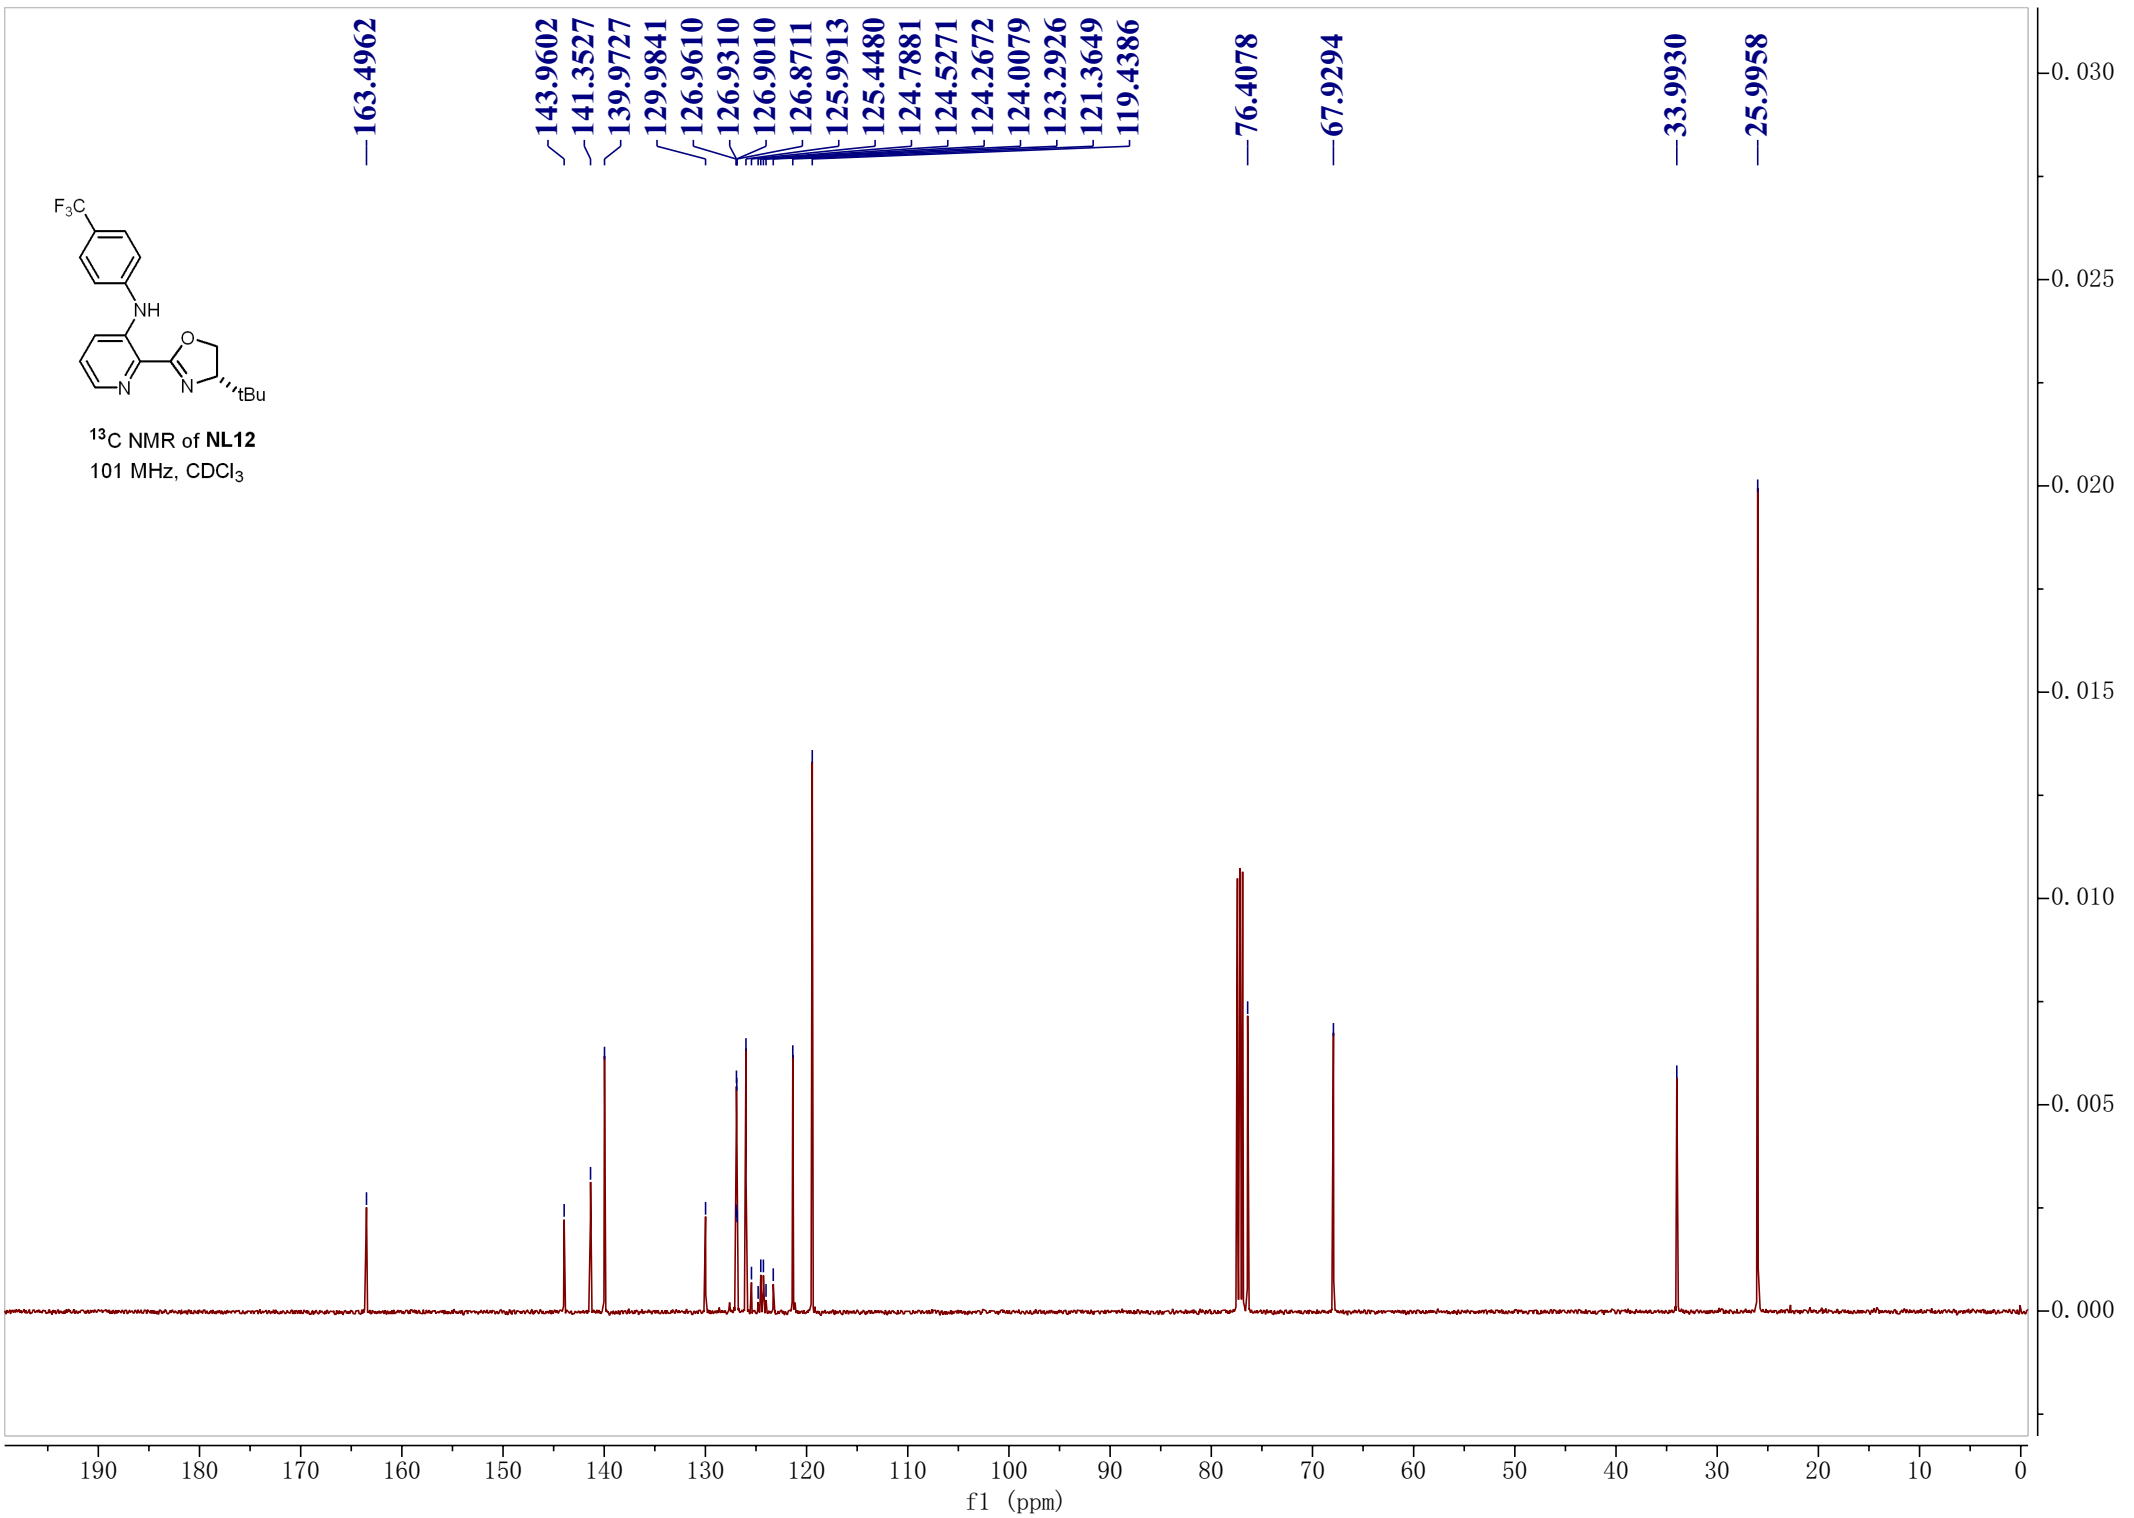

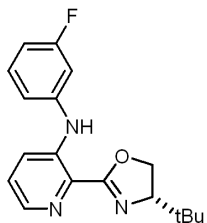

<sup>1</sup>H NMR of NL13  
500 MHz, CDCl<sub>3</sub>

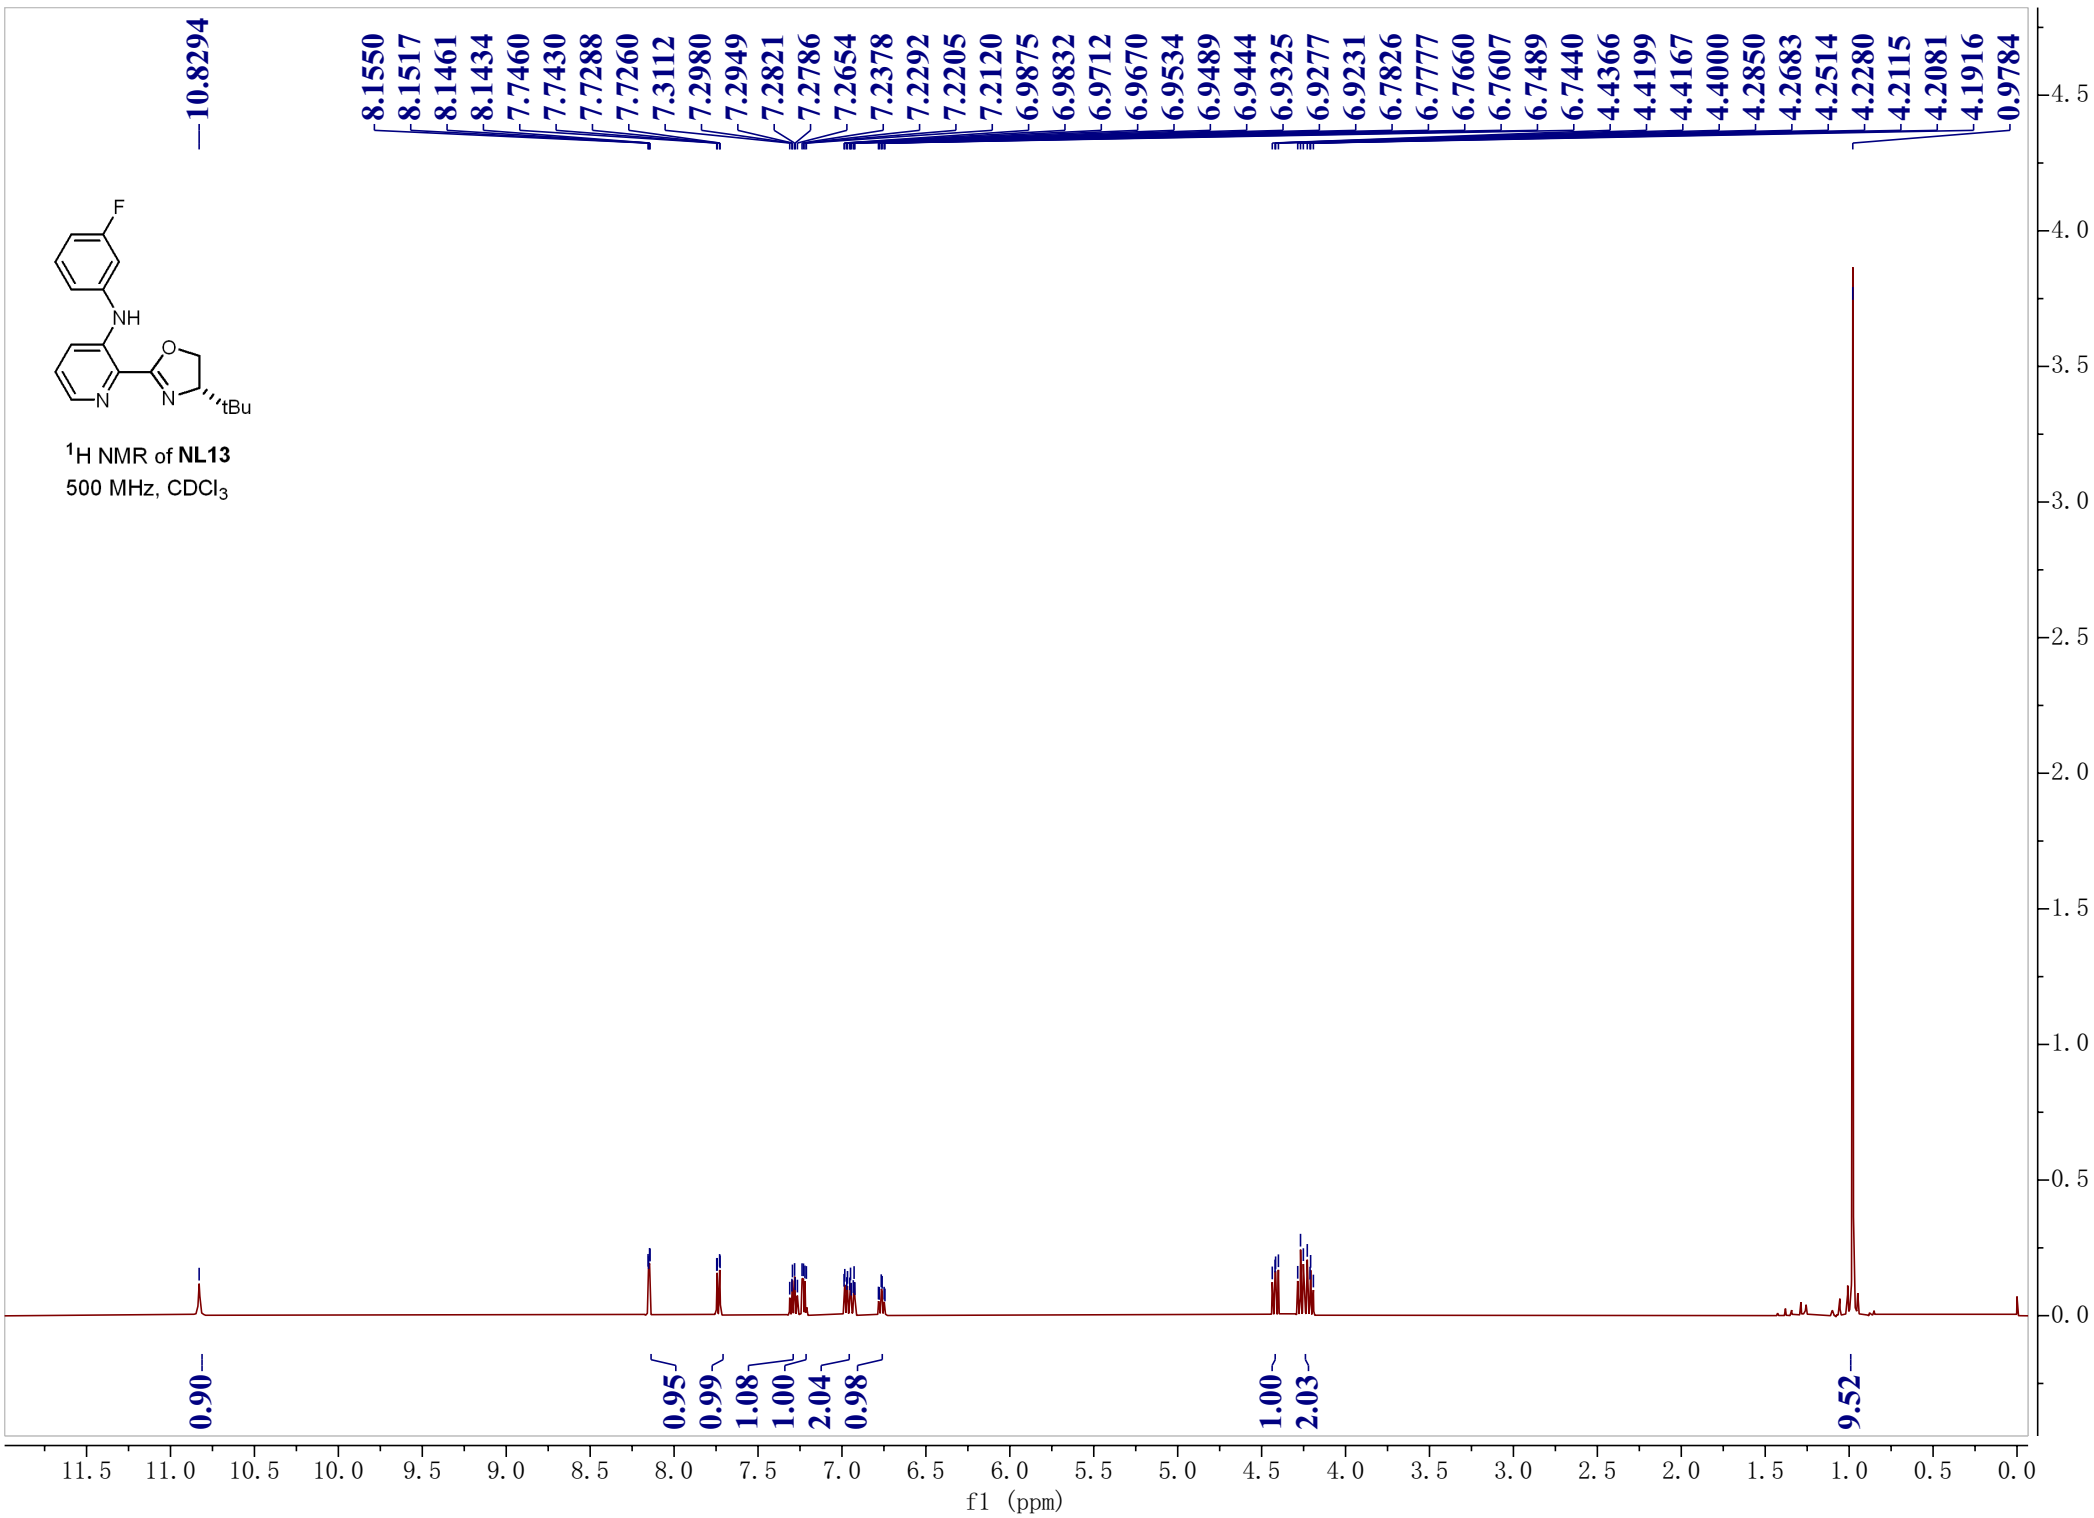

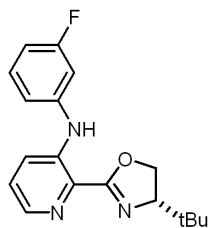

<sup>13</sup>C NMR of **NL13**  
126 MHz, CDCl<sub>3</sub>

164.6324  
163.5538  
162.6777

142.3978  
142.3178  
142.0501  
139.3436  
130.7824  
130.7048  
129.4051  
125.9568  
120.8881  
116.4667  
116.4436  
109.9708  
109.8012  
107.7703  
107.5820

76.4095

67.8164

33.9392

25.9809

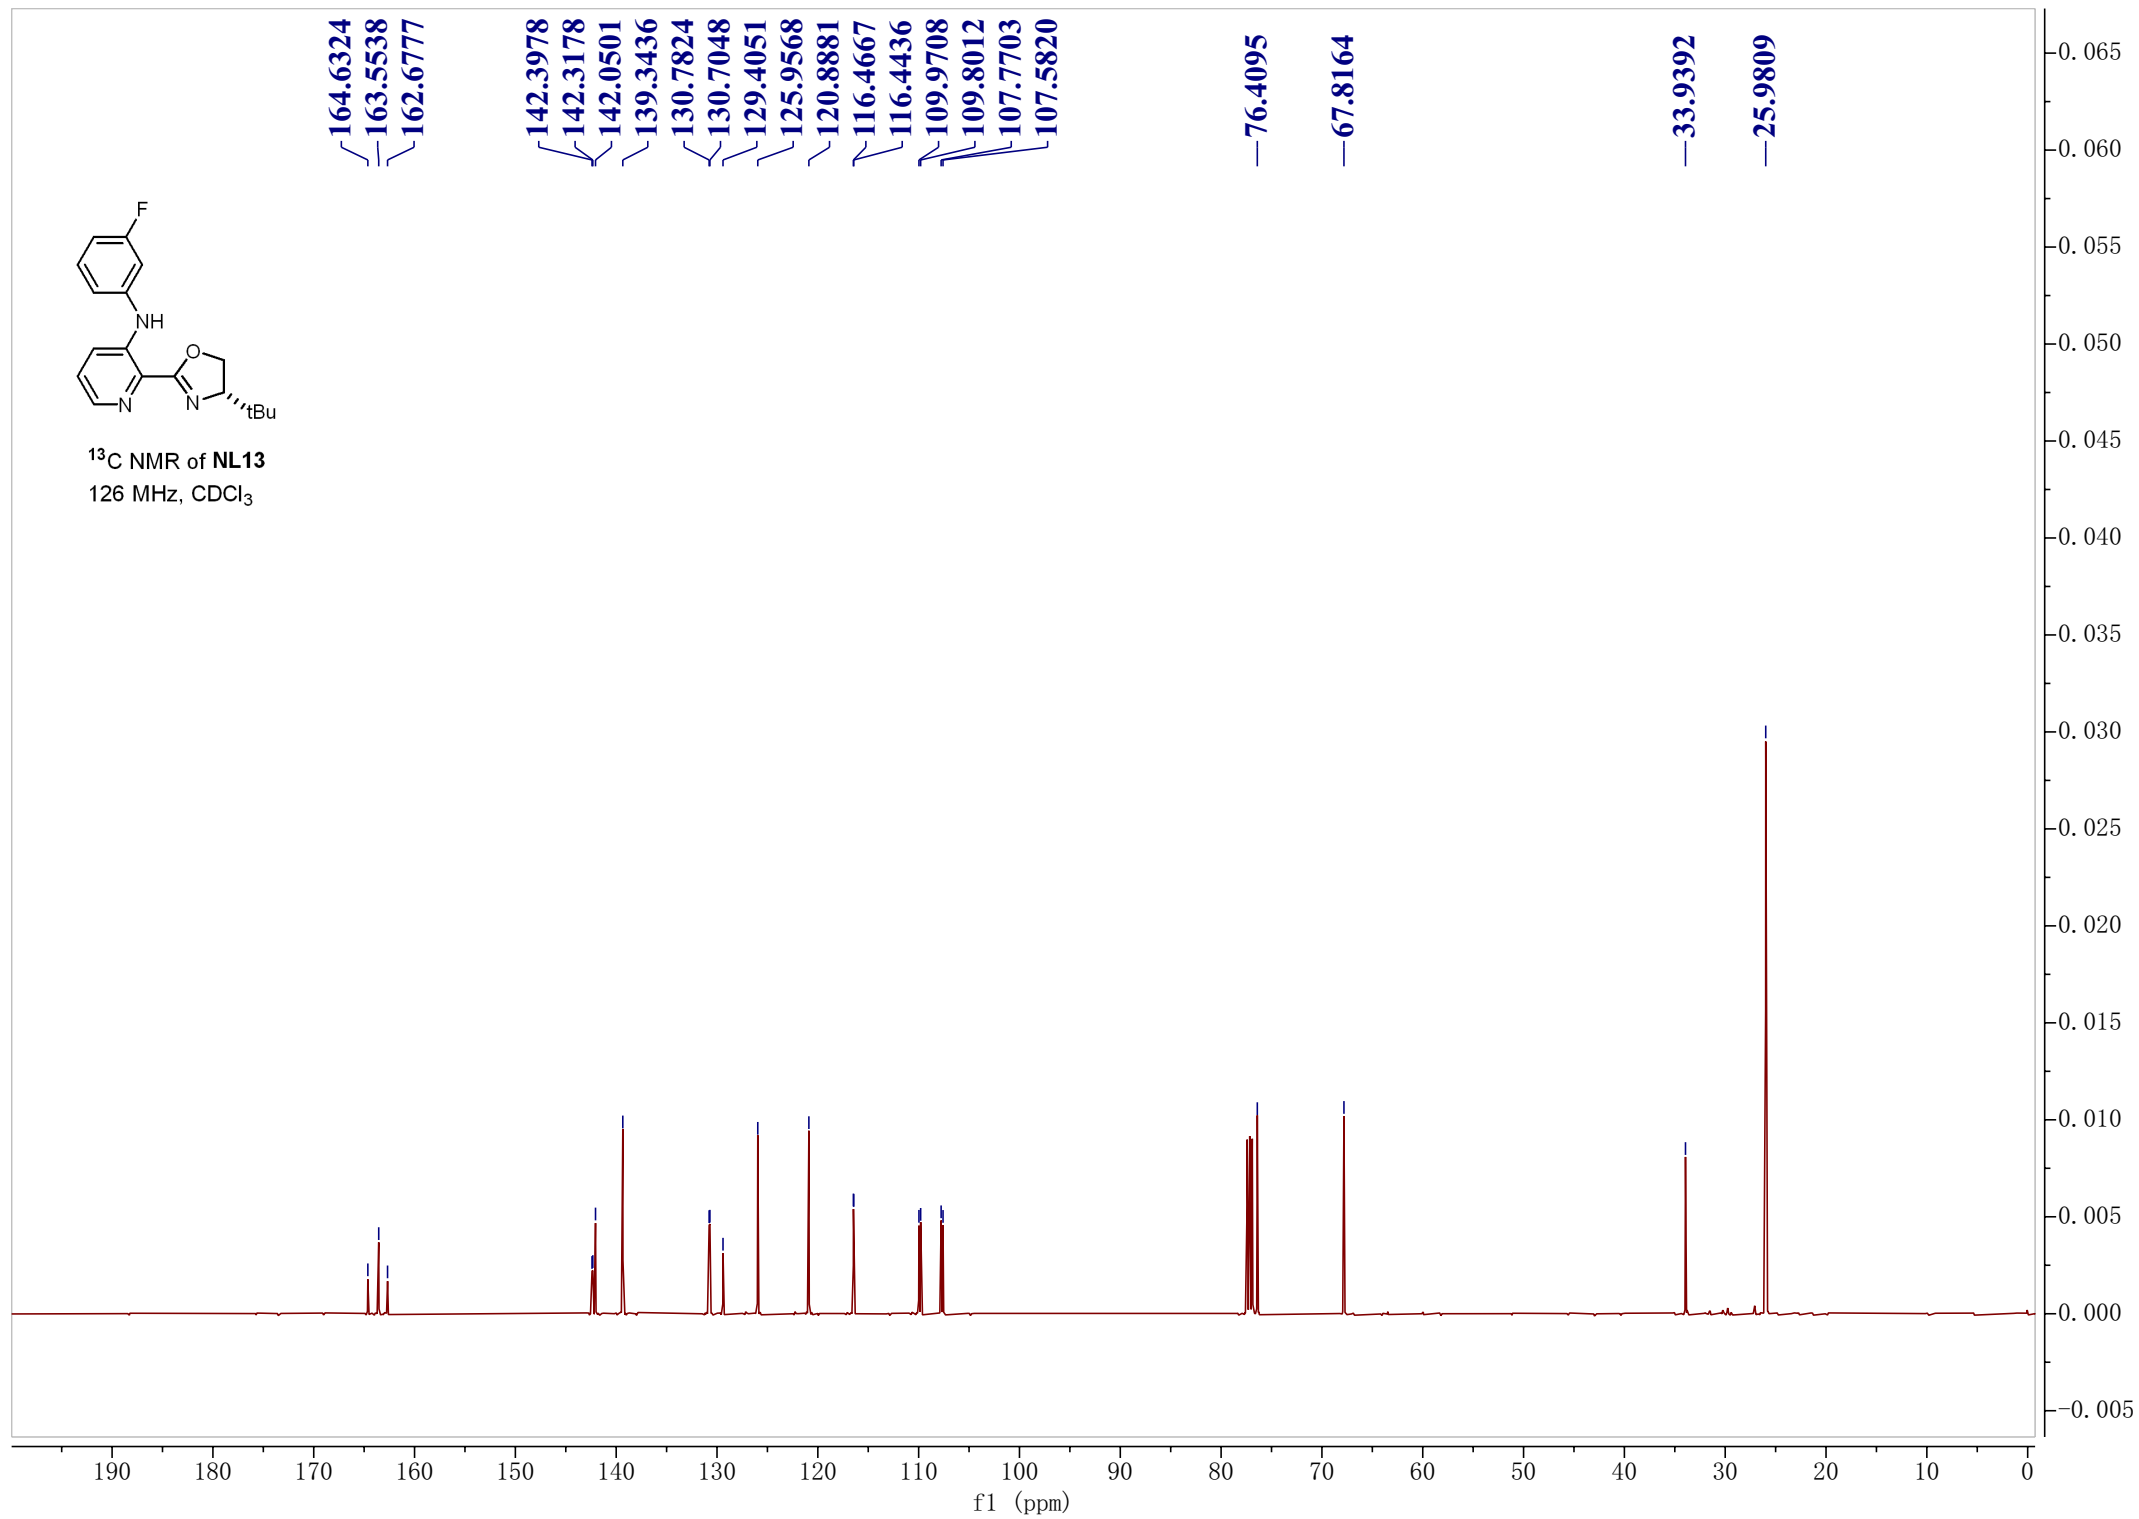

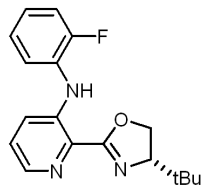

<sup>1</sup>H NMR of NL14  
400 MHz, CDCl<sub>3</sub>

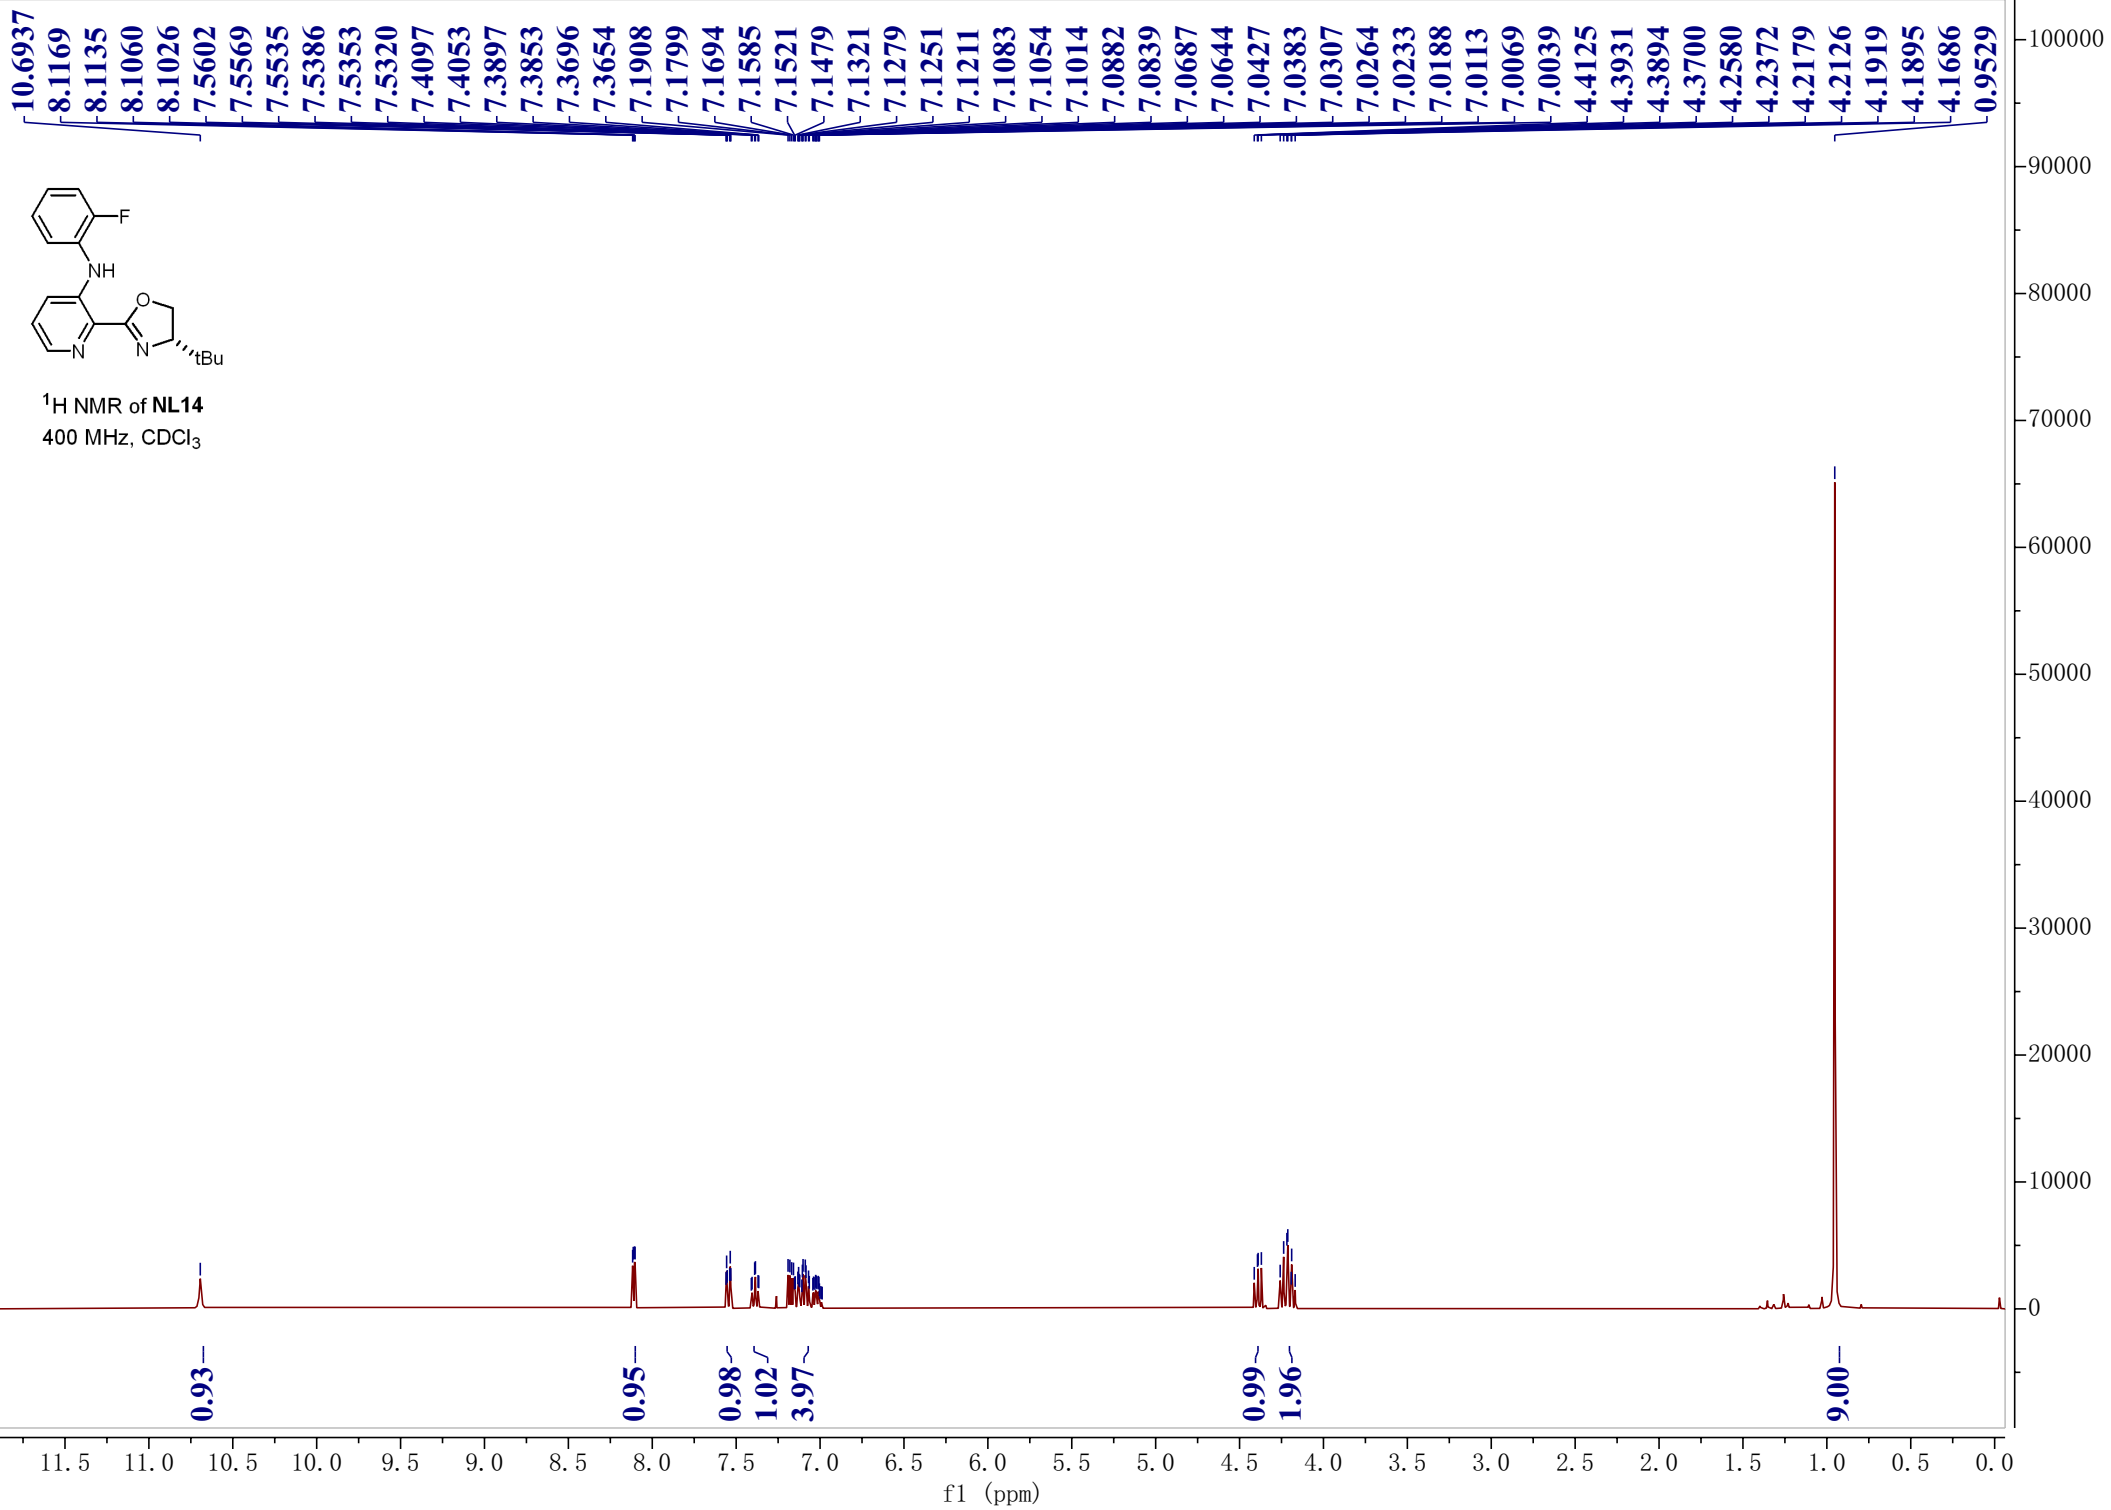

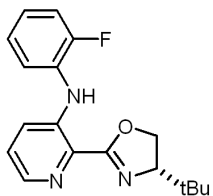

<sup>13</sup>C NMR of **NL14**  
101 MHz, CDCl<sub>3</sub>

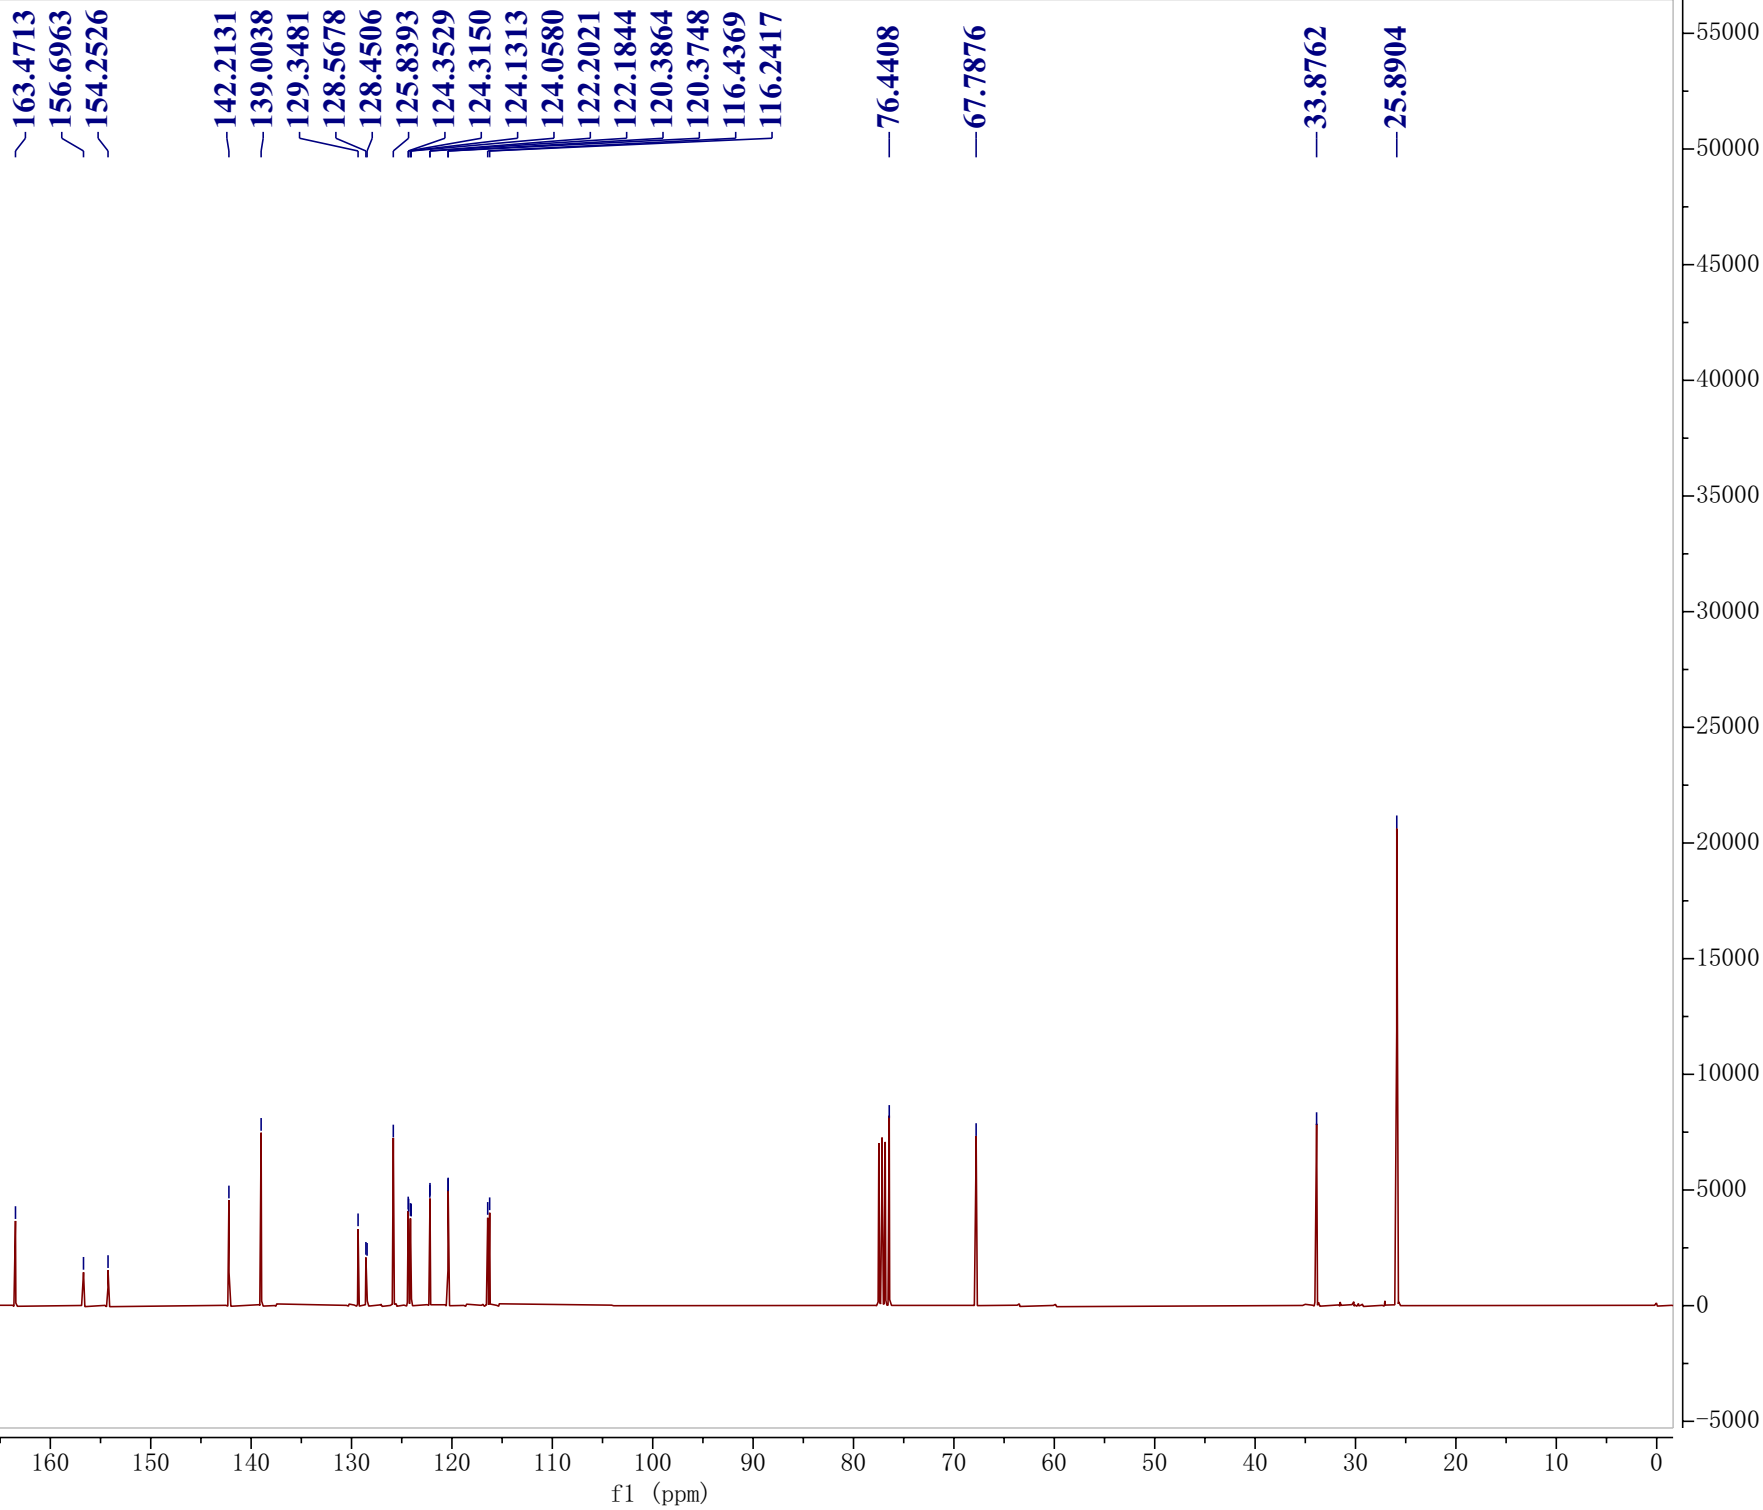

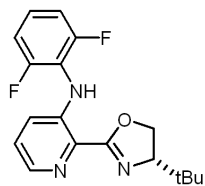

<sup>1</sup>H NMR of **NL15**  
500 MHz, CDCl<sub>3</sub>

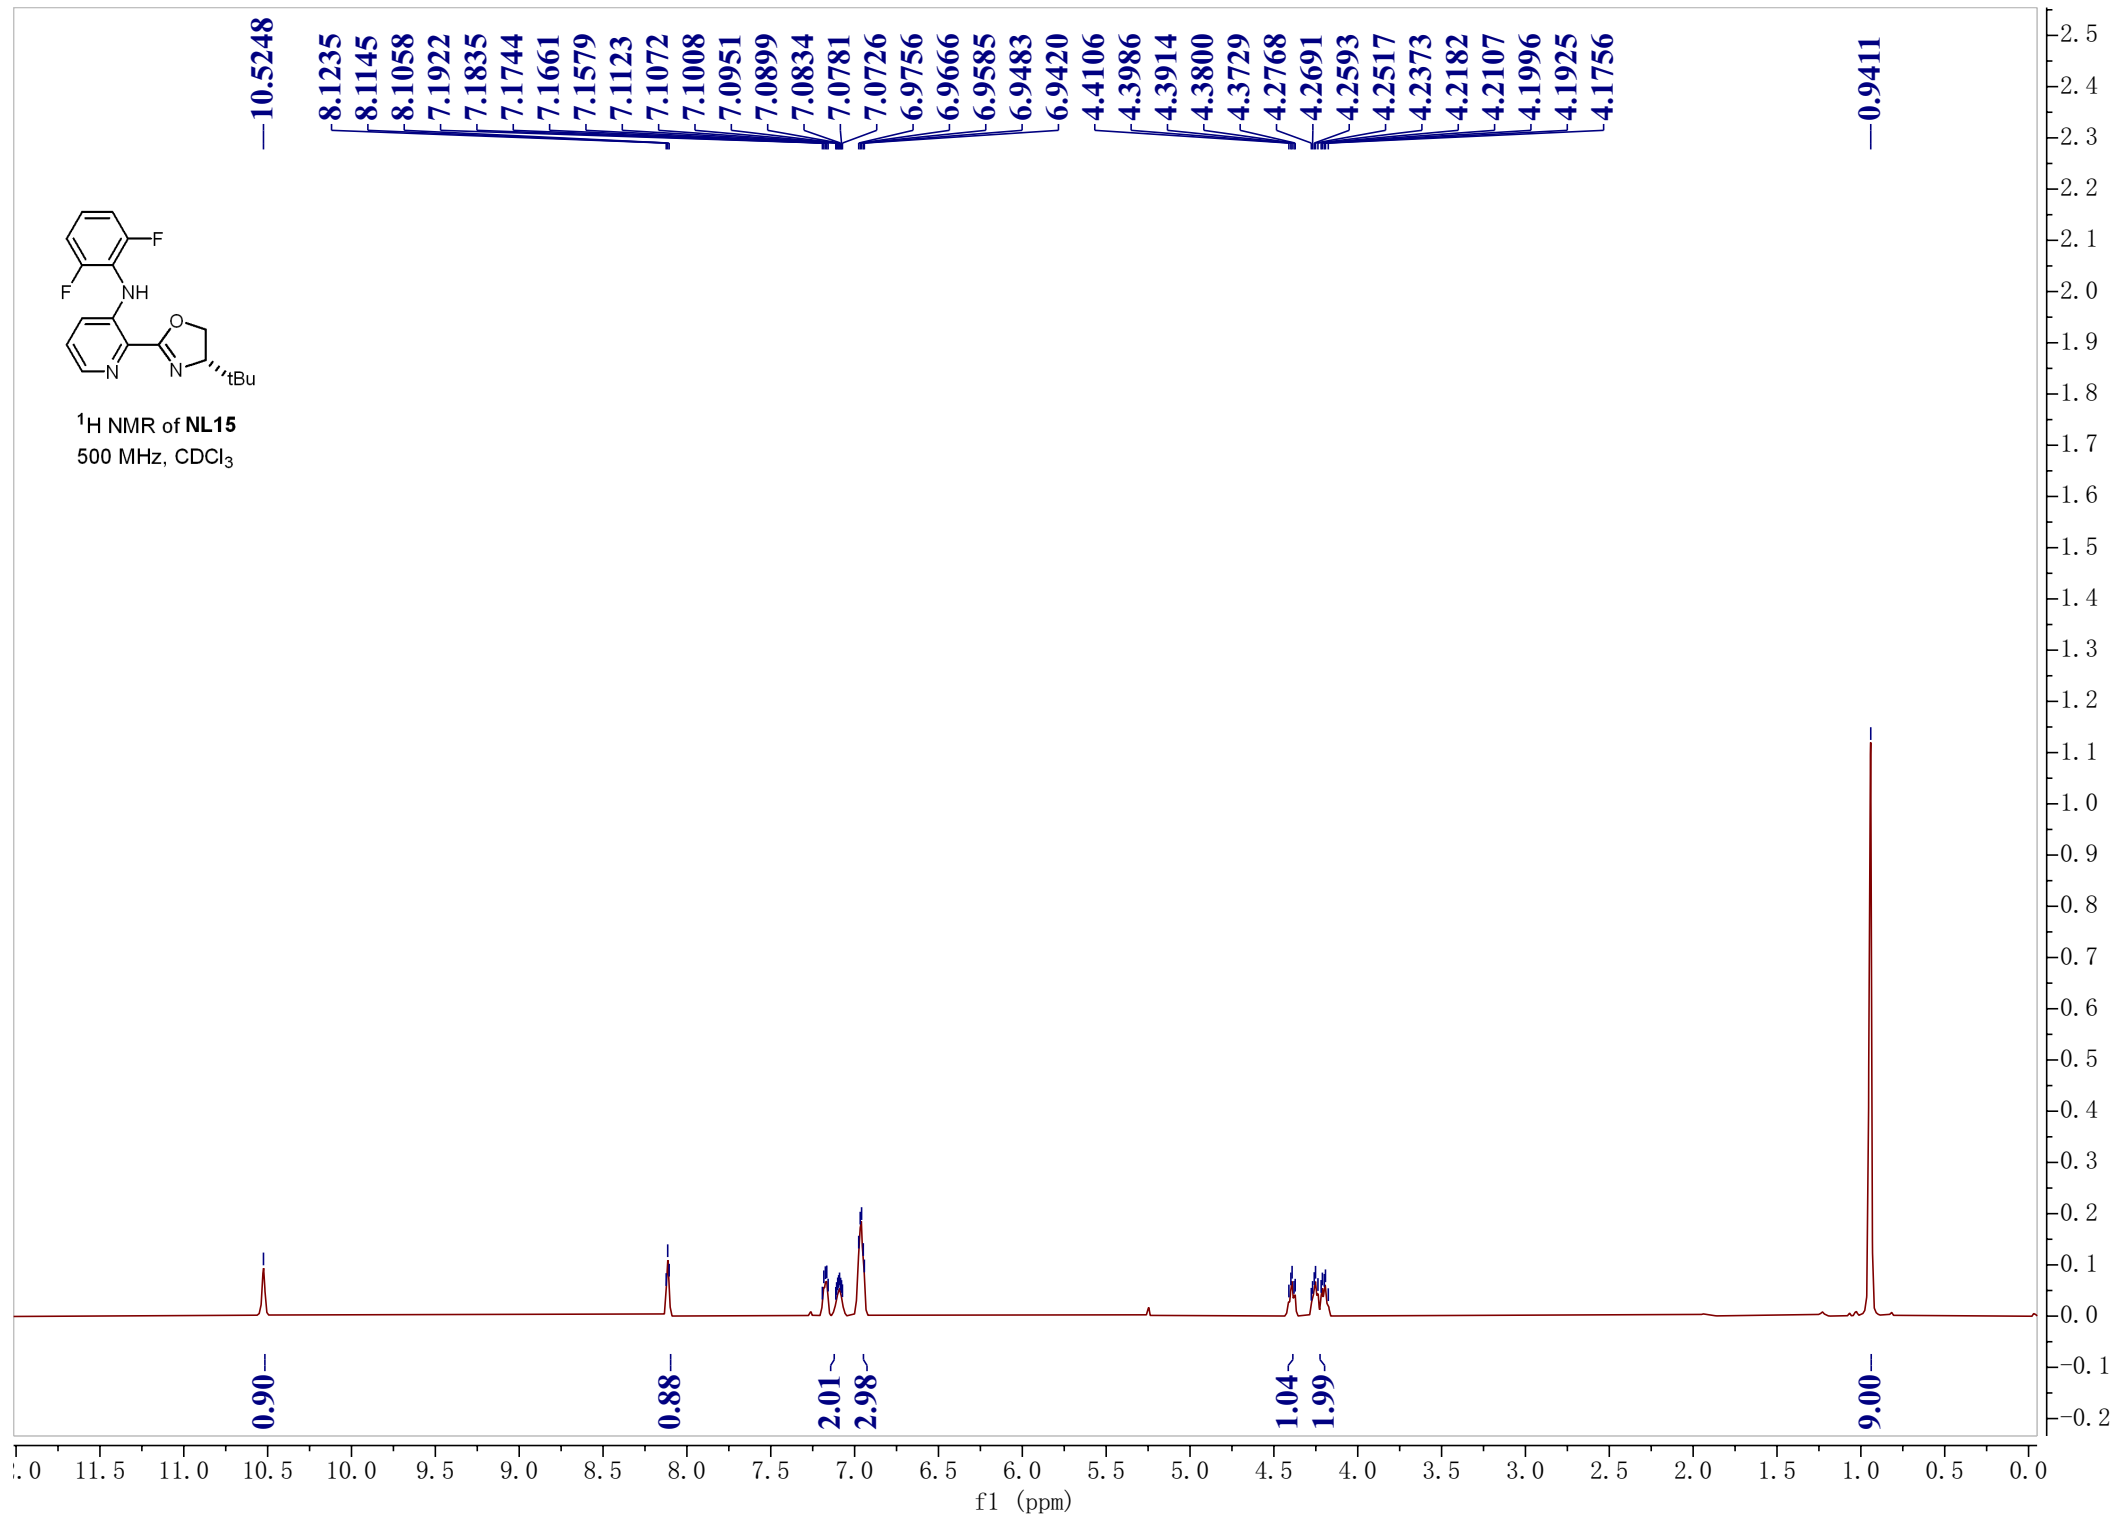

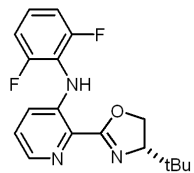

<sup>13</sup>C NMR of **NL15**  
126 MHz, CDCl<sub>3</sub>

163.7229  
158.7743  
158.7326  
156.7926  
156.7508

142.6266  
138.9999  
128.8674  
125.9443  
125.3438  
125.2675  
125.1913  
120.7023  
120.6782  
120.6541  
117.3614  
117.2358  
117.1110  
112.2067  
112.1685  
112.0559  
112.0188

76.3747  
67.8777

33.9539  
25.8936

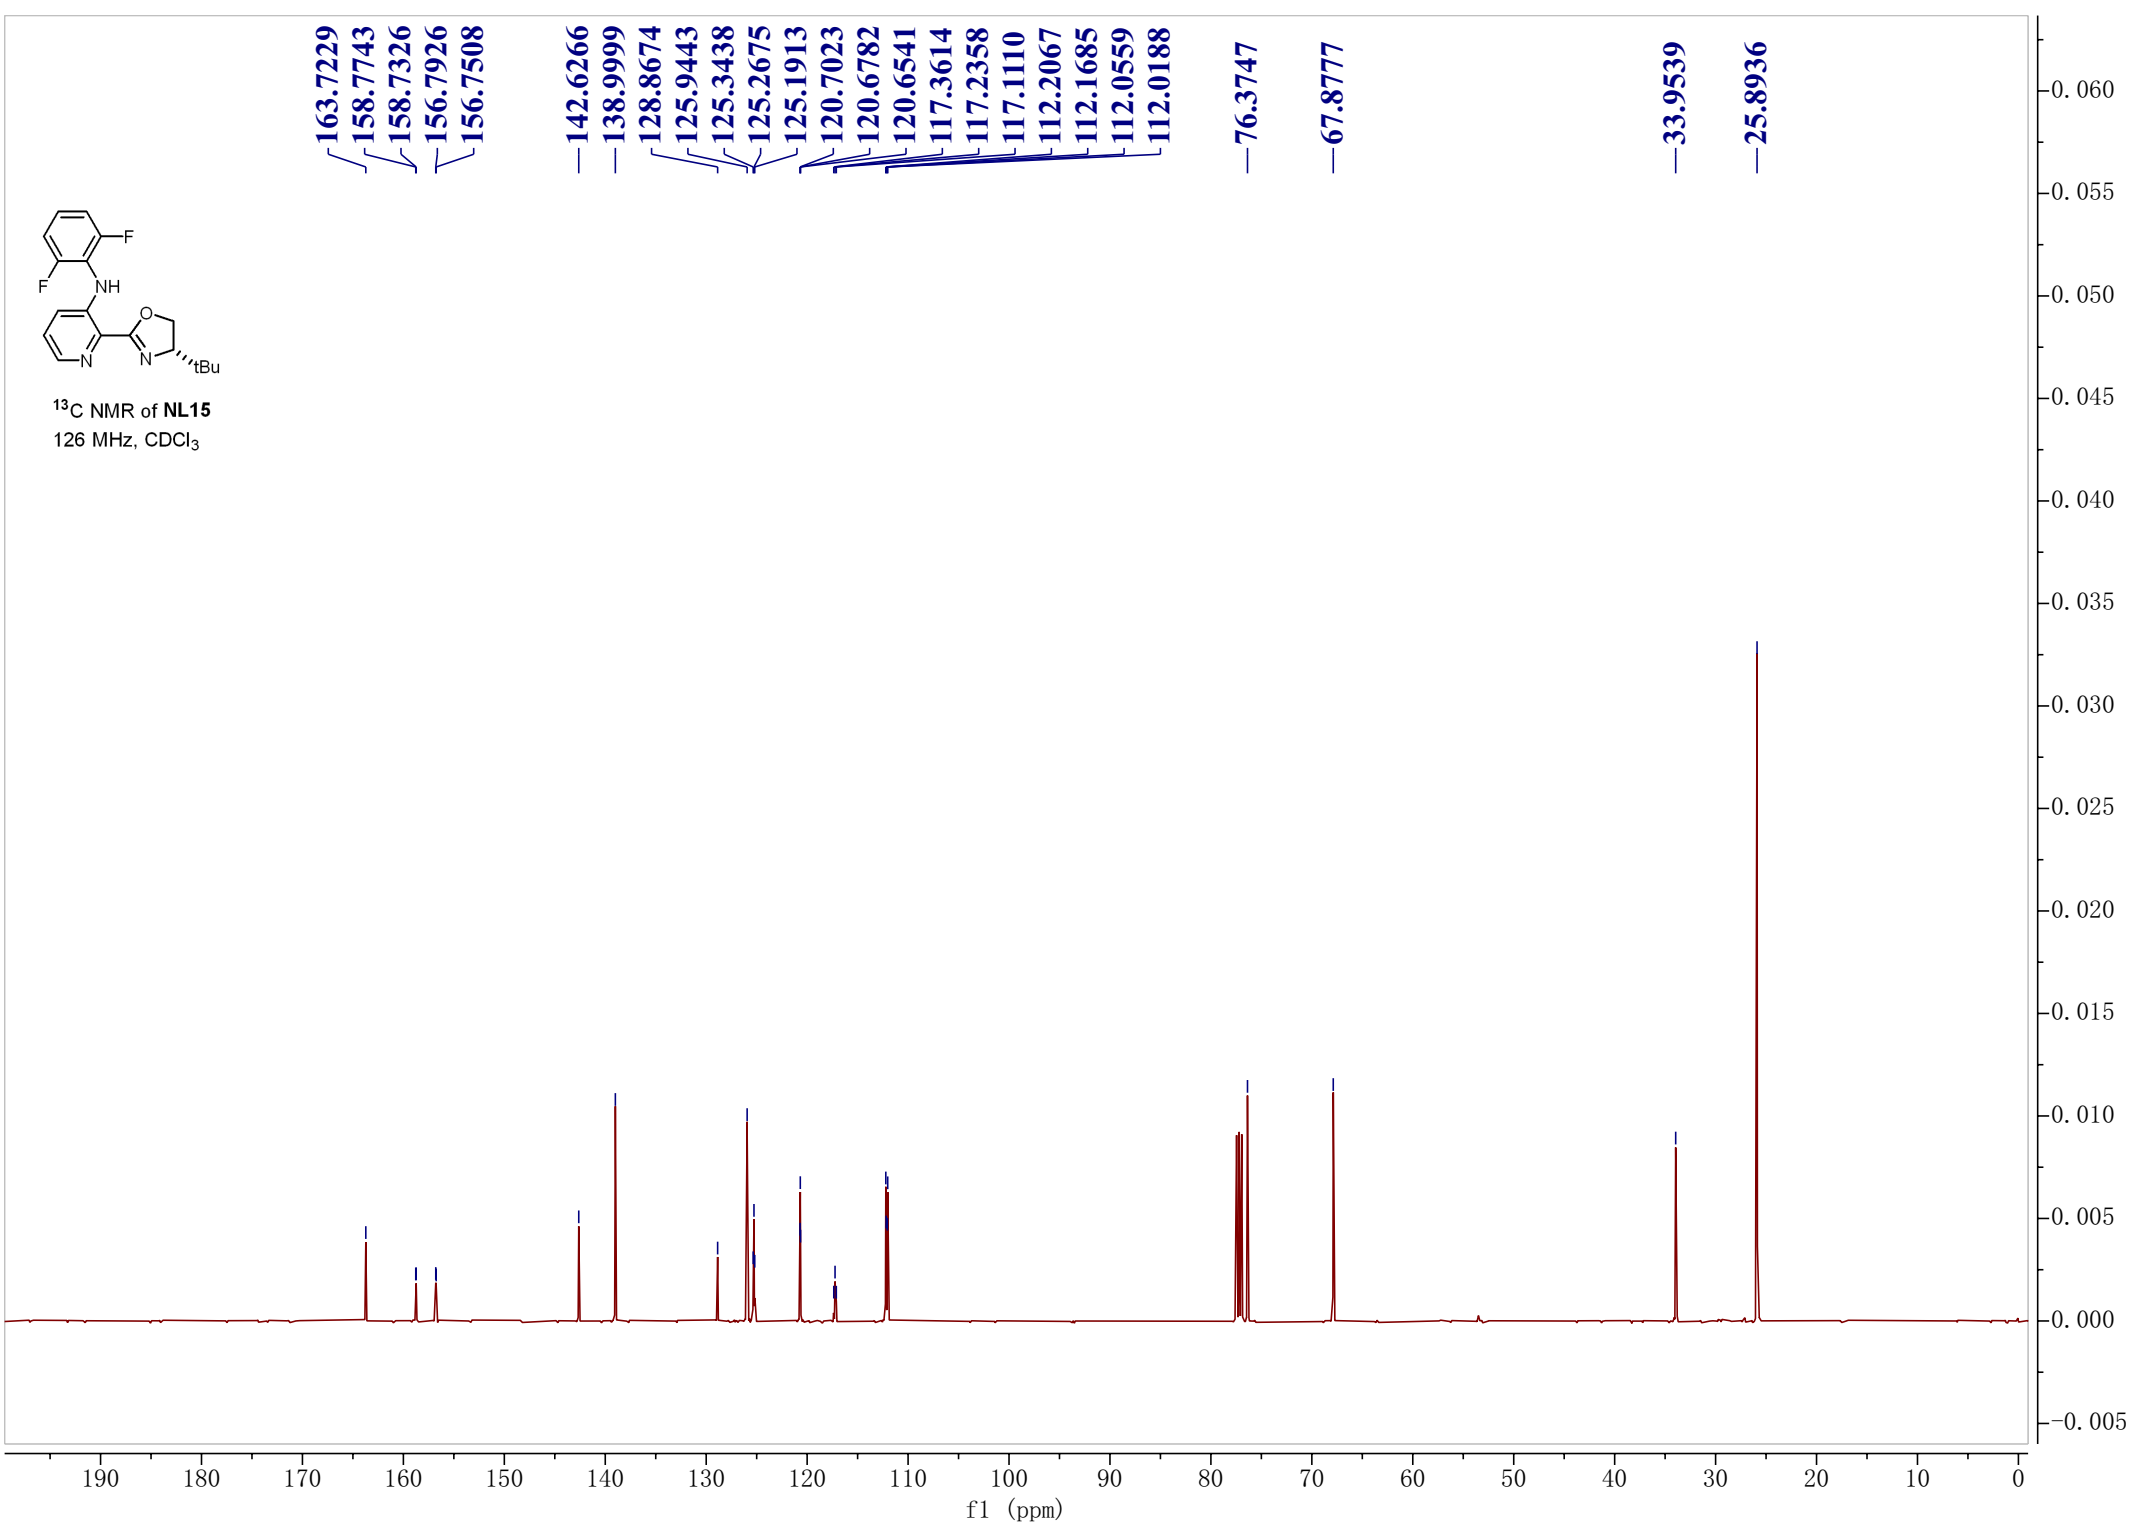



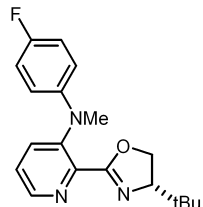

<sup>1</sup>H NMR of NMeNL11  
500 MHz, CDCl<sub>3</sub>

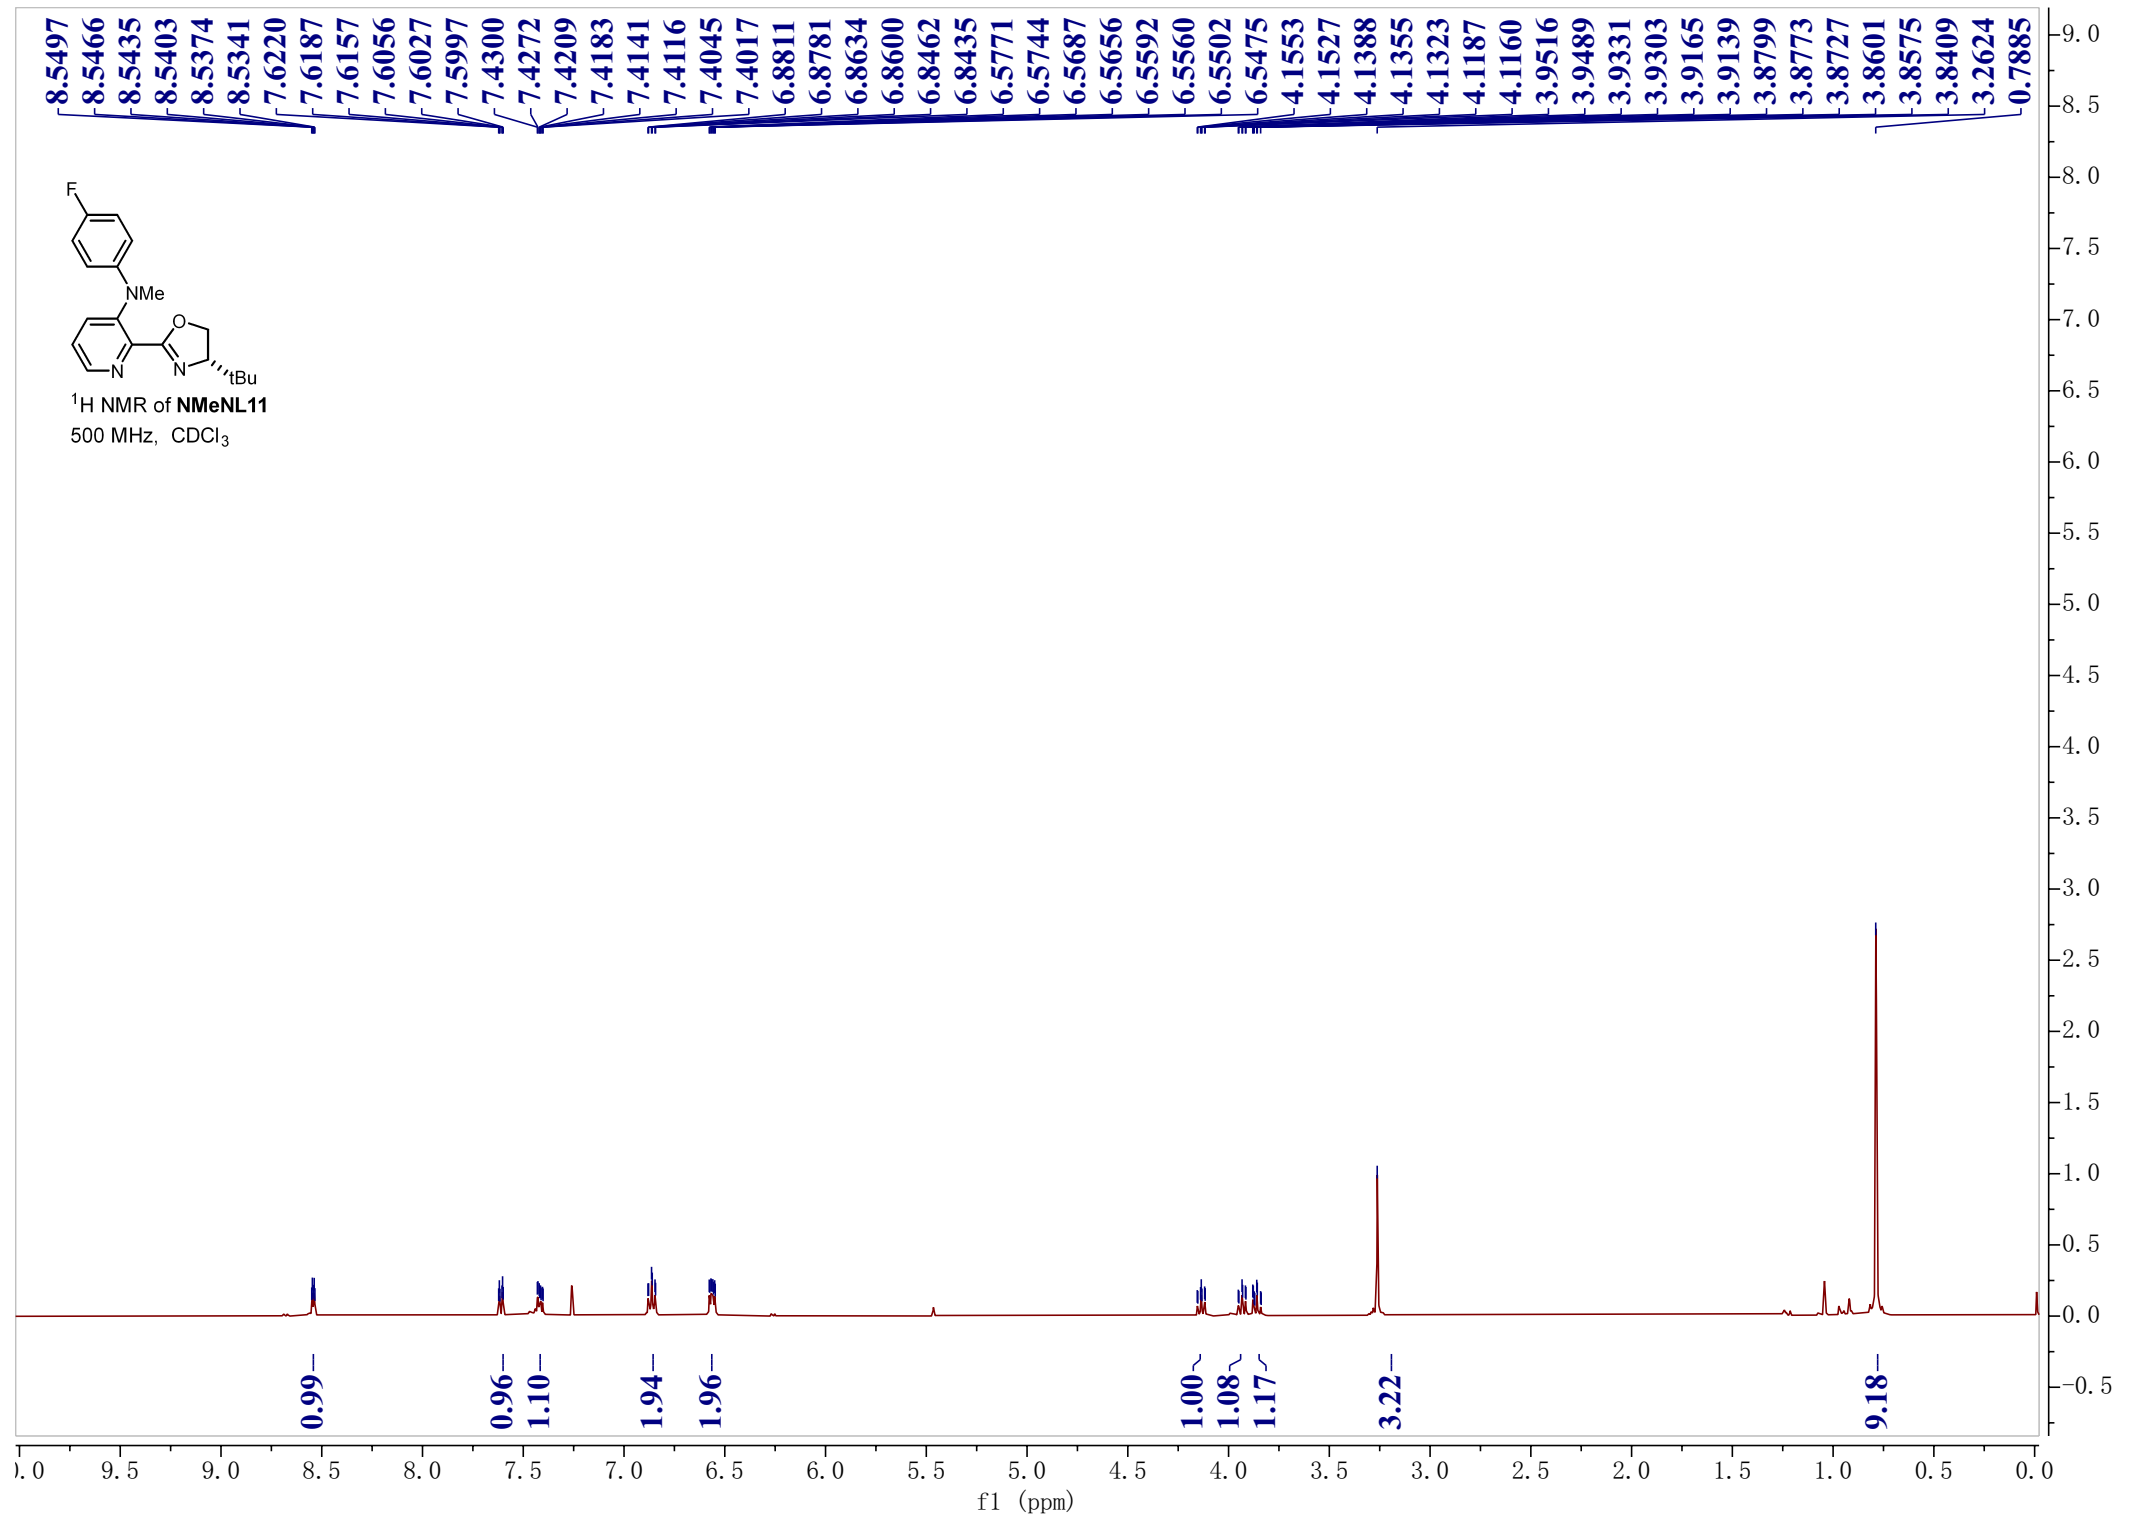

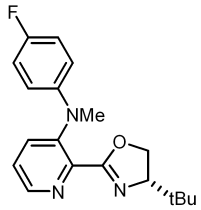

<sup>13</sup>C NMR of NMeNL11  
126 MHz, CDCl<sub>3</sub>

~161.4238  
~157.5969  
~155.7111  
146.1847  
145.3440  
145.2739  
144.9124  
—136.6039  
129.0841  
129.0115  
126.2884  
116.2905  
116.2292  
115.6054  
115.4275

—76.6429

—68.8106

—40.9503

—33.5653

—25.9927

0.034  
0.032  
0.030  
0.028  
0.026  
0.024  
0.022  
0.020  
0.018  
0.016  
0.014  
0.012  
0.010  
0.008  
0.006  
0.004  
0.002  
0.000  
-0.002

f1 (ppm)

11.8488

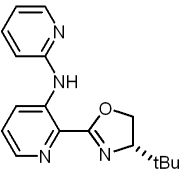

<sup>1</sup>HNMR of ZNL1  
400 MHz, CDCl<sub>3</sub>

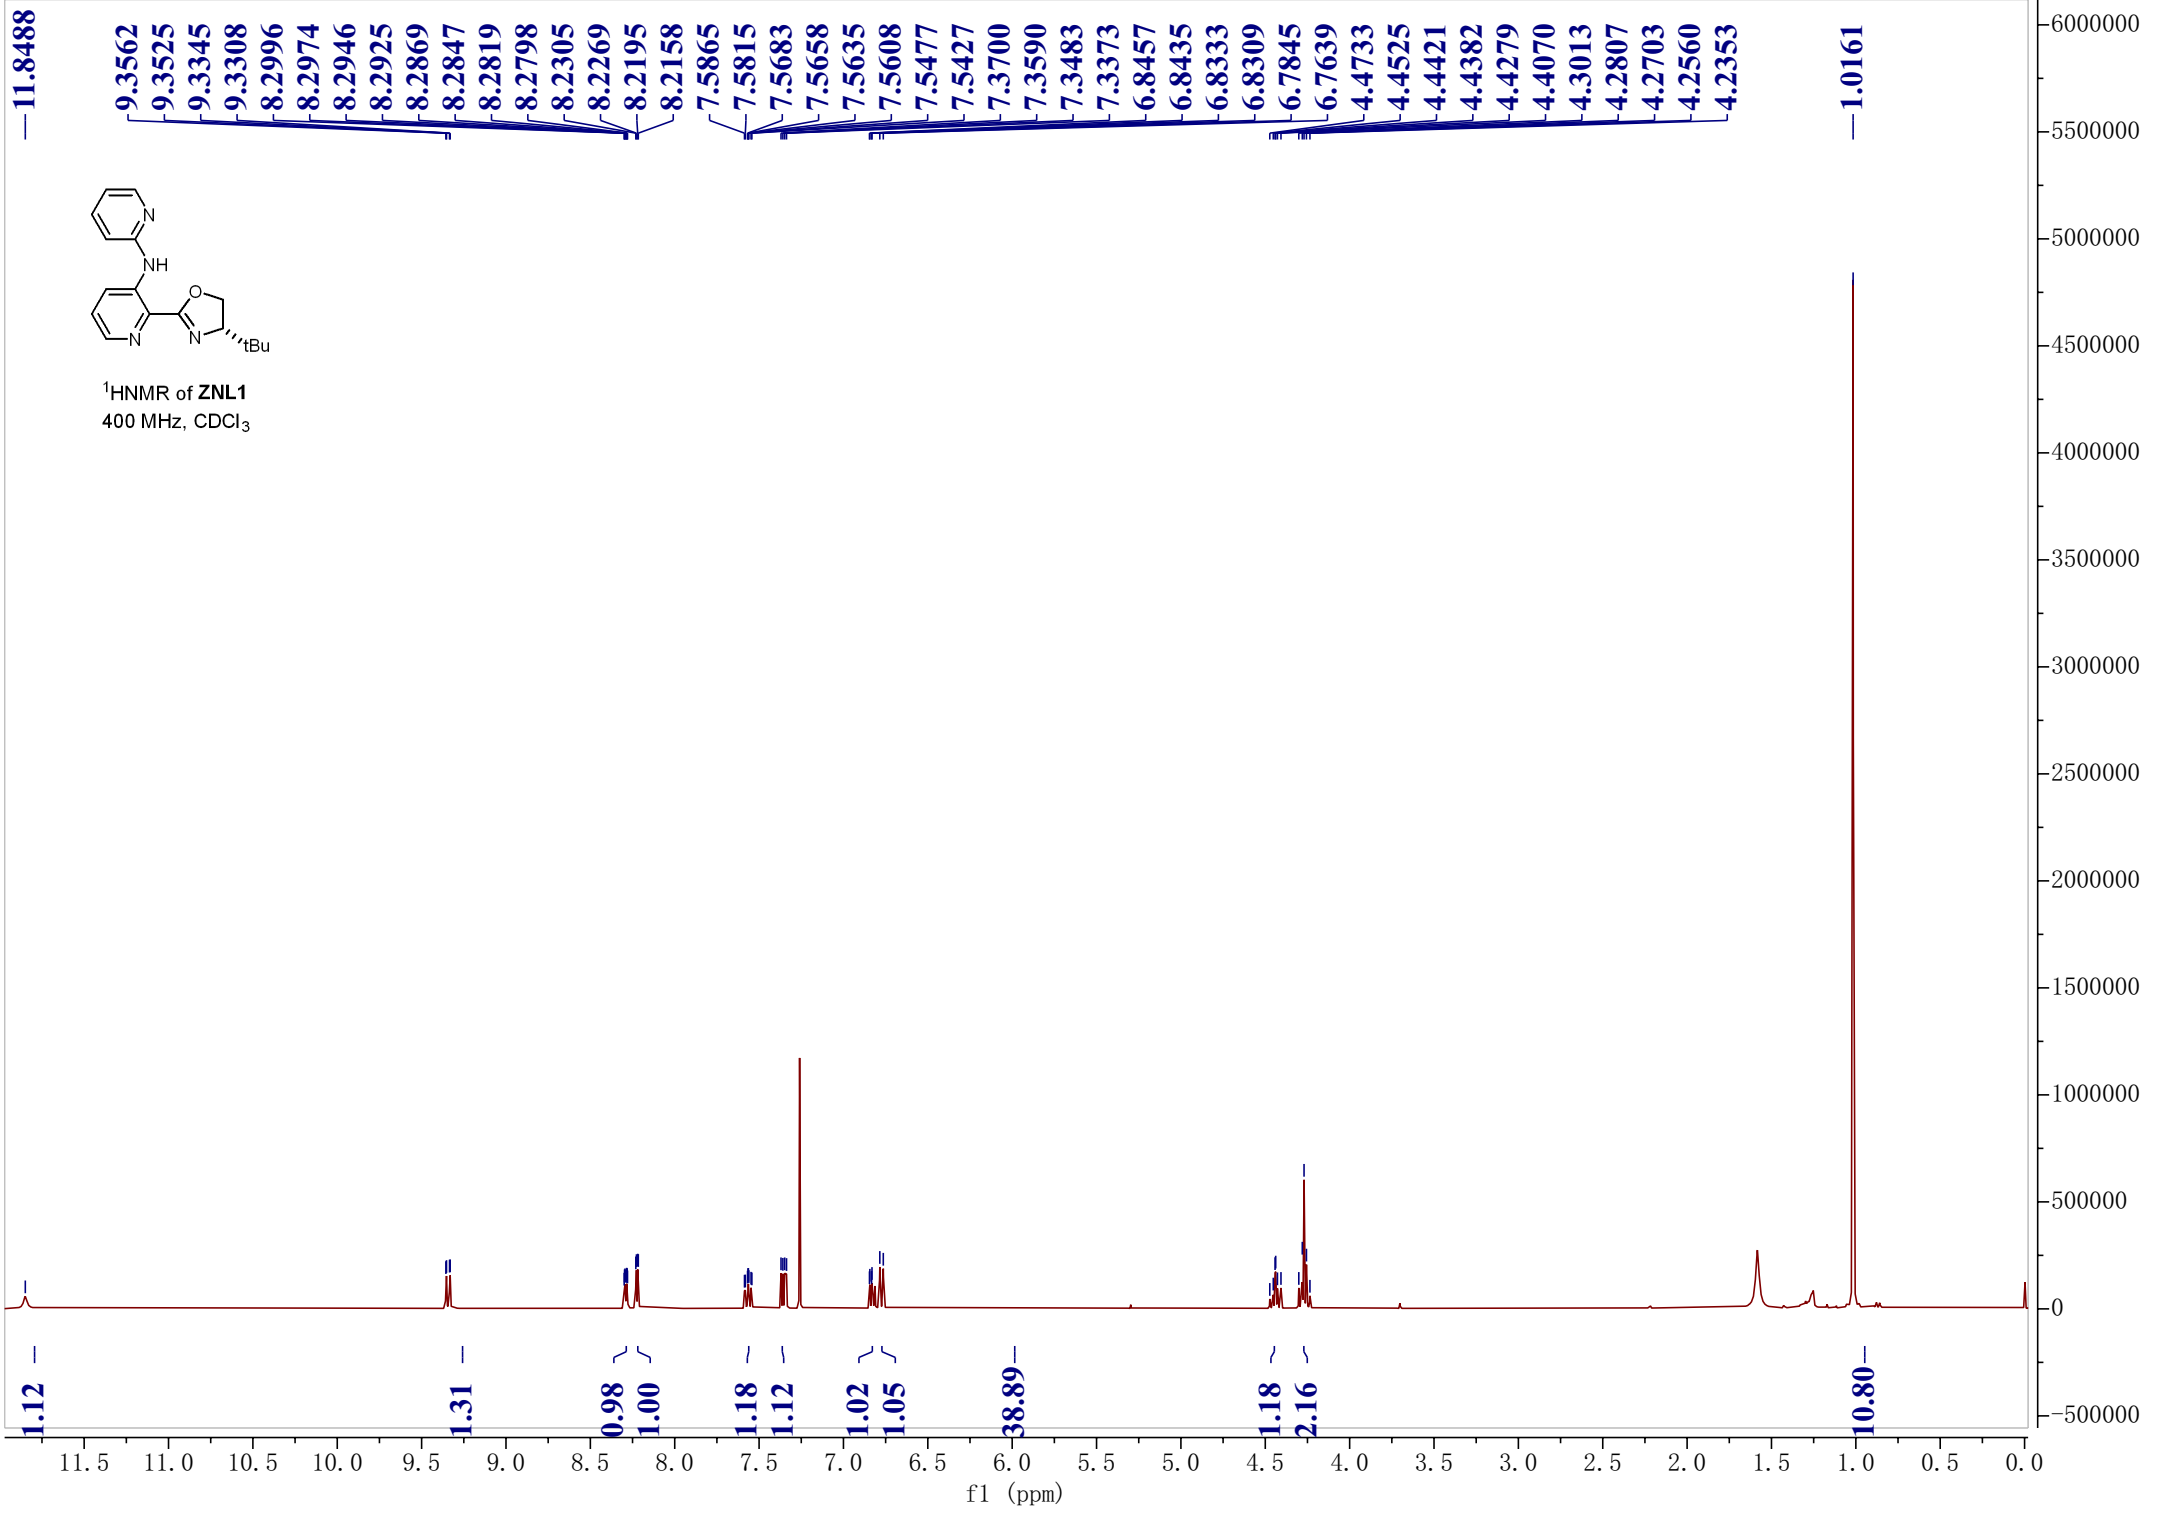

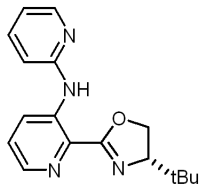

<sup>13</sup>CNMR of ZNL1  
101 MHz, CDCl<sub>3</sub>

—163.9606

—155.2408

~147.6459

~140.6845

~140.2485

~137.6794

~129.5624

~126.2337

~125.2618

—116.1994

—113.0889

—76.5099

—67.9006

—34.1132

—26.1250

f1 (ppm)

320000  
300000  
280000  
260000  
240000  
220000  
200000  
180000  
160000  
140000  
120000  
100000  
80000  
60000  
40000  
20000  
0  
-20000

—12.2821

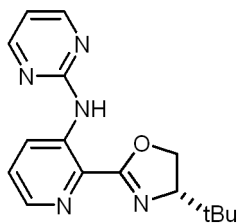

<sup>1</sup>HNMR of **ZNL2**  
400 MHz, CDCl<sub>3</sub>

9.3085  
9.3047  
9.2867  
9.2829  
8.4864  
8.4744  
8.2874  
8.2836  
8.2764  
8.2727  
7.3919  
7.3809  
7.3702  
7.3592  
6.7944  
6.7825  
6.7704

4.4284  
4.4247  
4.3953  
4.3141  
4.2942  
4.2910  
4.2812

—1.0188

0.96

0.93

1.83

0.98

0.95

1.01

0.99

1.90

9.00

12.5 12.0 11.5 11.0 10.5 10.0 9.5 9.0 8.5 8.0 7.5 7.0 6.5 6.0 5.5 5.0 4.5 4.0 3.5 3.0 2.5 2.0 1.5 1.0 0.5 0.0

f1 (ppm)

3.6 × 10<sup>7</sup>  
3.4 × 10<sup>7</sup>  
3.2 × 10<sup>7</sup>  
3.0 × 10<sup>7</sup>  
2.8 × 10<sup>7</sup>  
2.6 × 10<sup>7</sup>  
2.4 × 10<sup>7</sup>  
2.2 × 10<sup>7</sup>  
2.0 × 10<sup>7</sup>  
1.8 × 10<sup>7</sup>  
1.6 × 10<sup>7</sup>  
1.4 × 10<sup>7</sup>  
1.2 × 10<sup>7</sup>  
1.0 × 10<sup>7</sup>  
8.0 × 10<sup>6</sup>  
6.0 × 10<sup>6</sup>  
4.0 × 10<sup>6</sup>  
2.0 × 10<sup>6</sup>  
0.0  
-2.0 × 10<sup>6</sup>

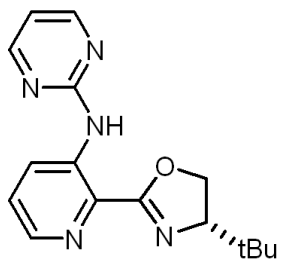

<sup>13</sup>CNMR of **ZNL2**  
101 MHz, CDCl<sub>3</sub>

~163.3462  
~160.3175  
~157.9891

~141.1531  
~139.3550

~130.5970  
~126.0172  
~125.9812

—113.6228

—76.4990

—67.9645

—34.1695

—26.0134

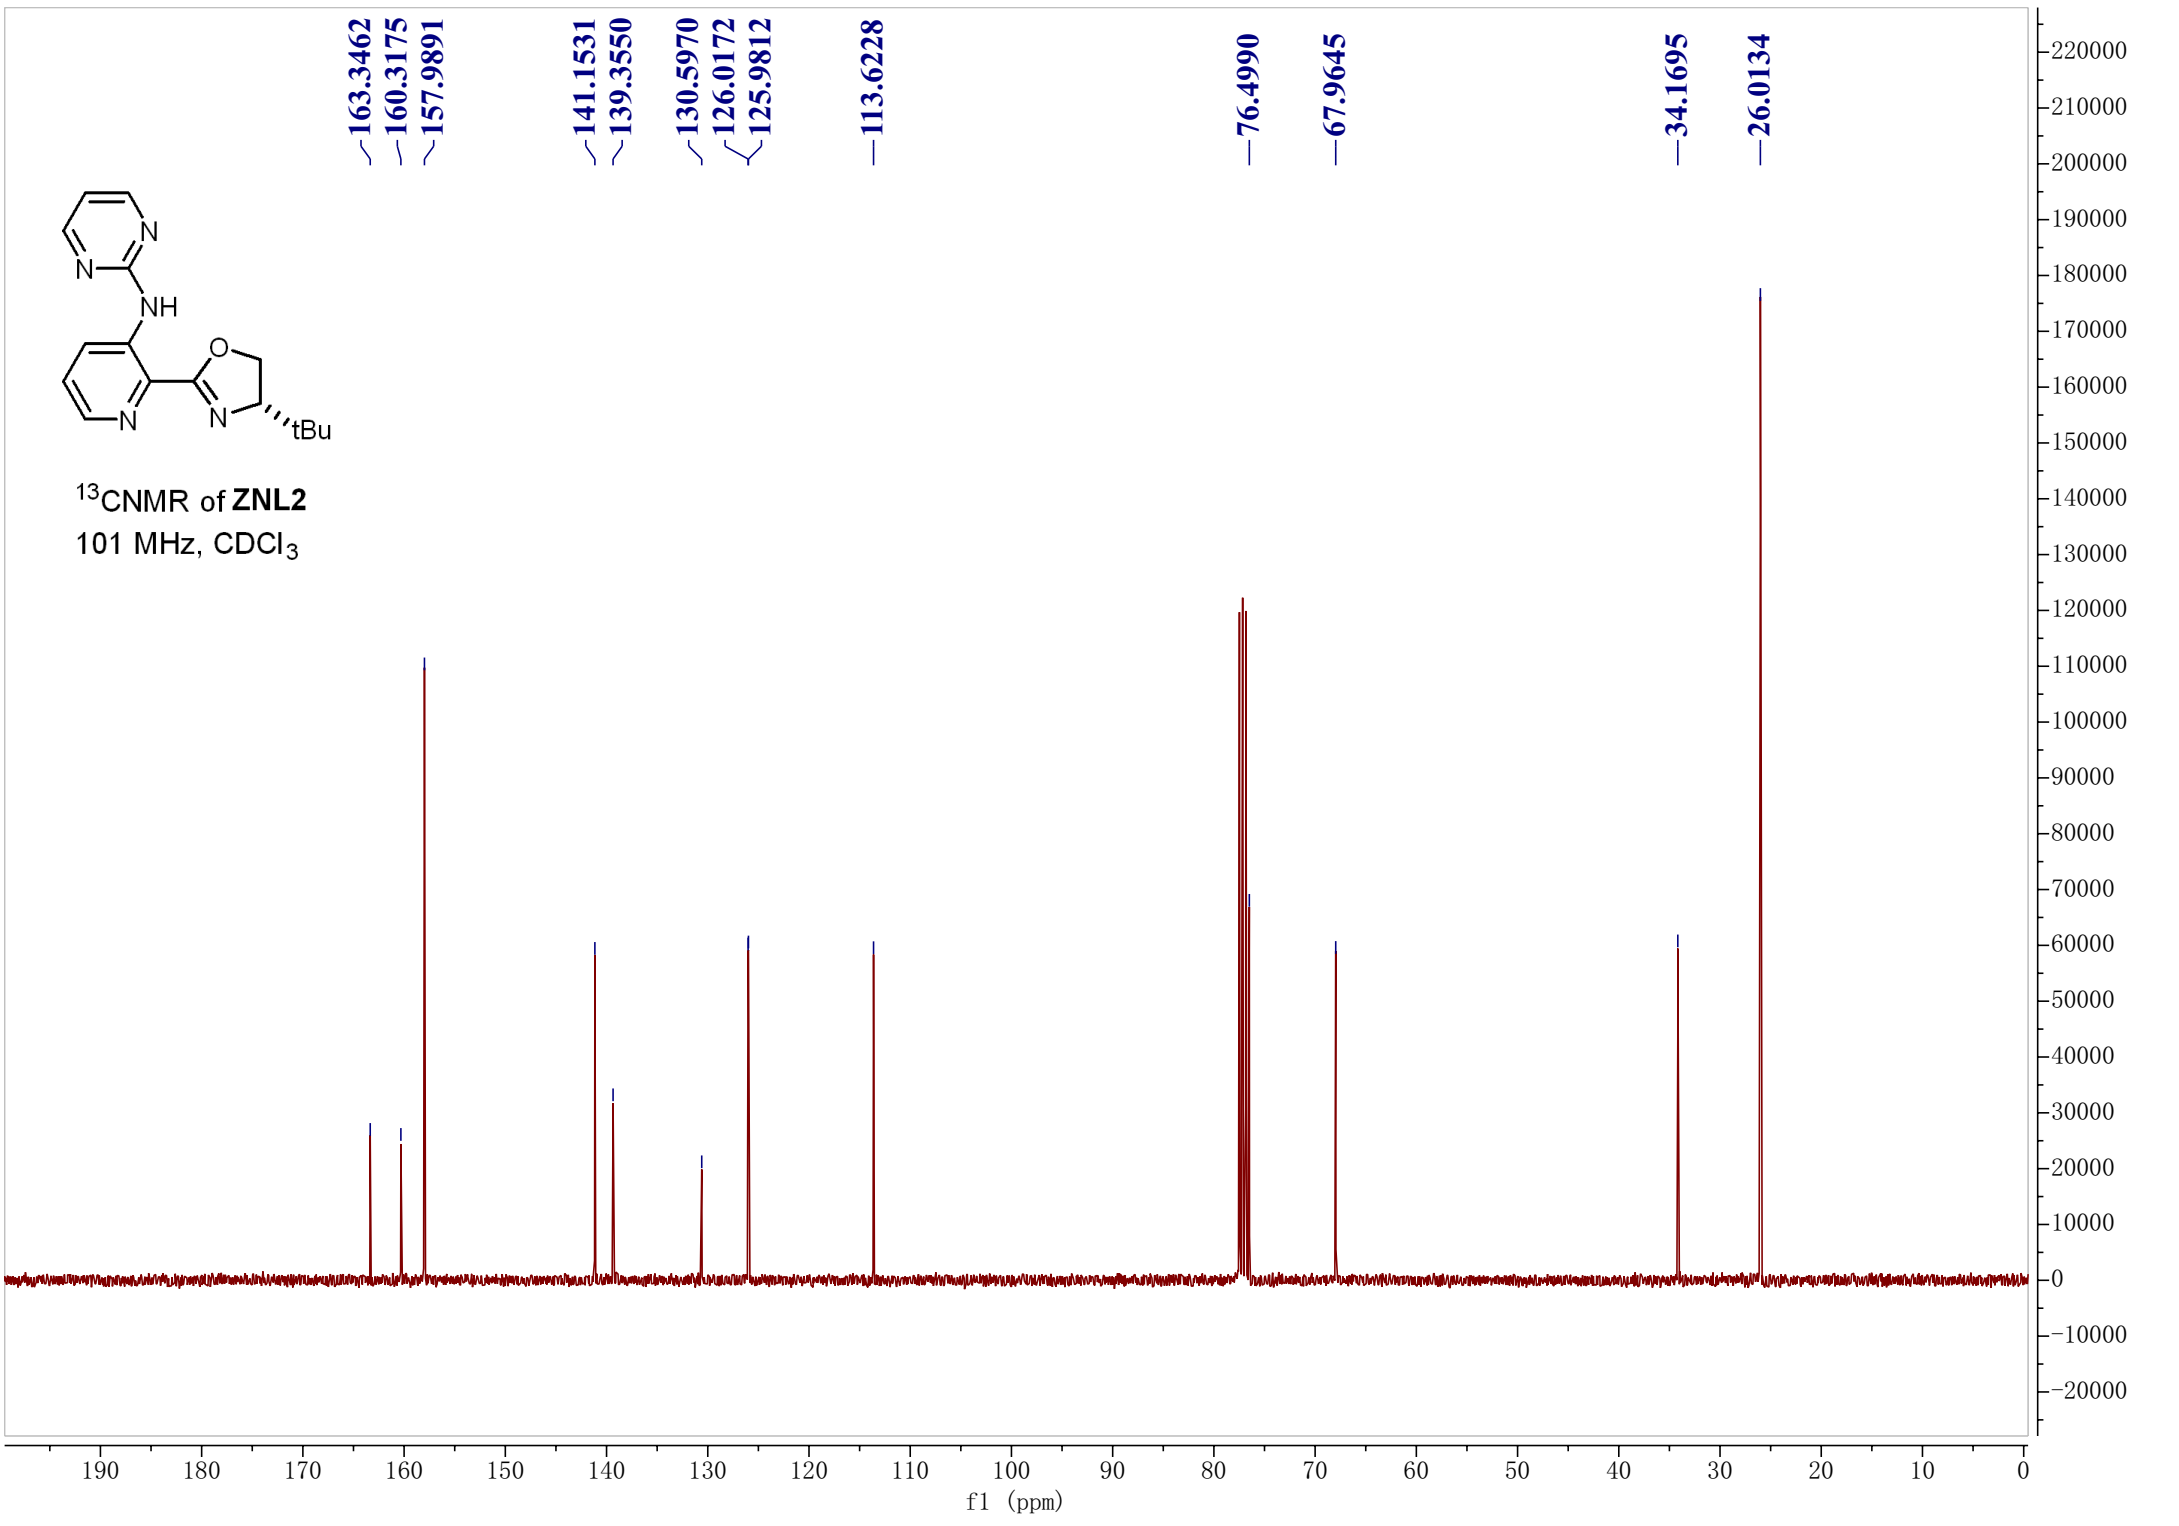

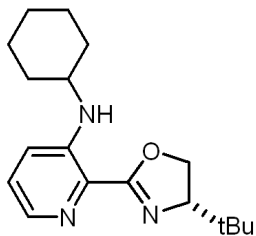

<sup>1</sup>HNMR of **ZNL3**  
400 MHz, CDCl<sub>3</sub>

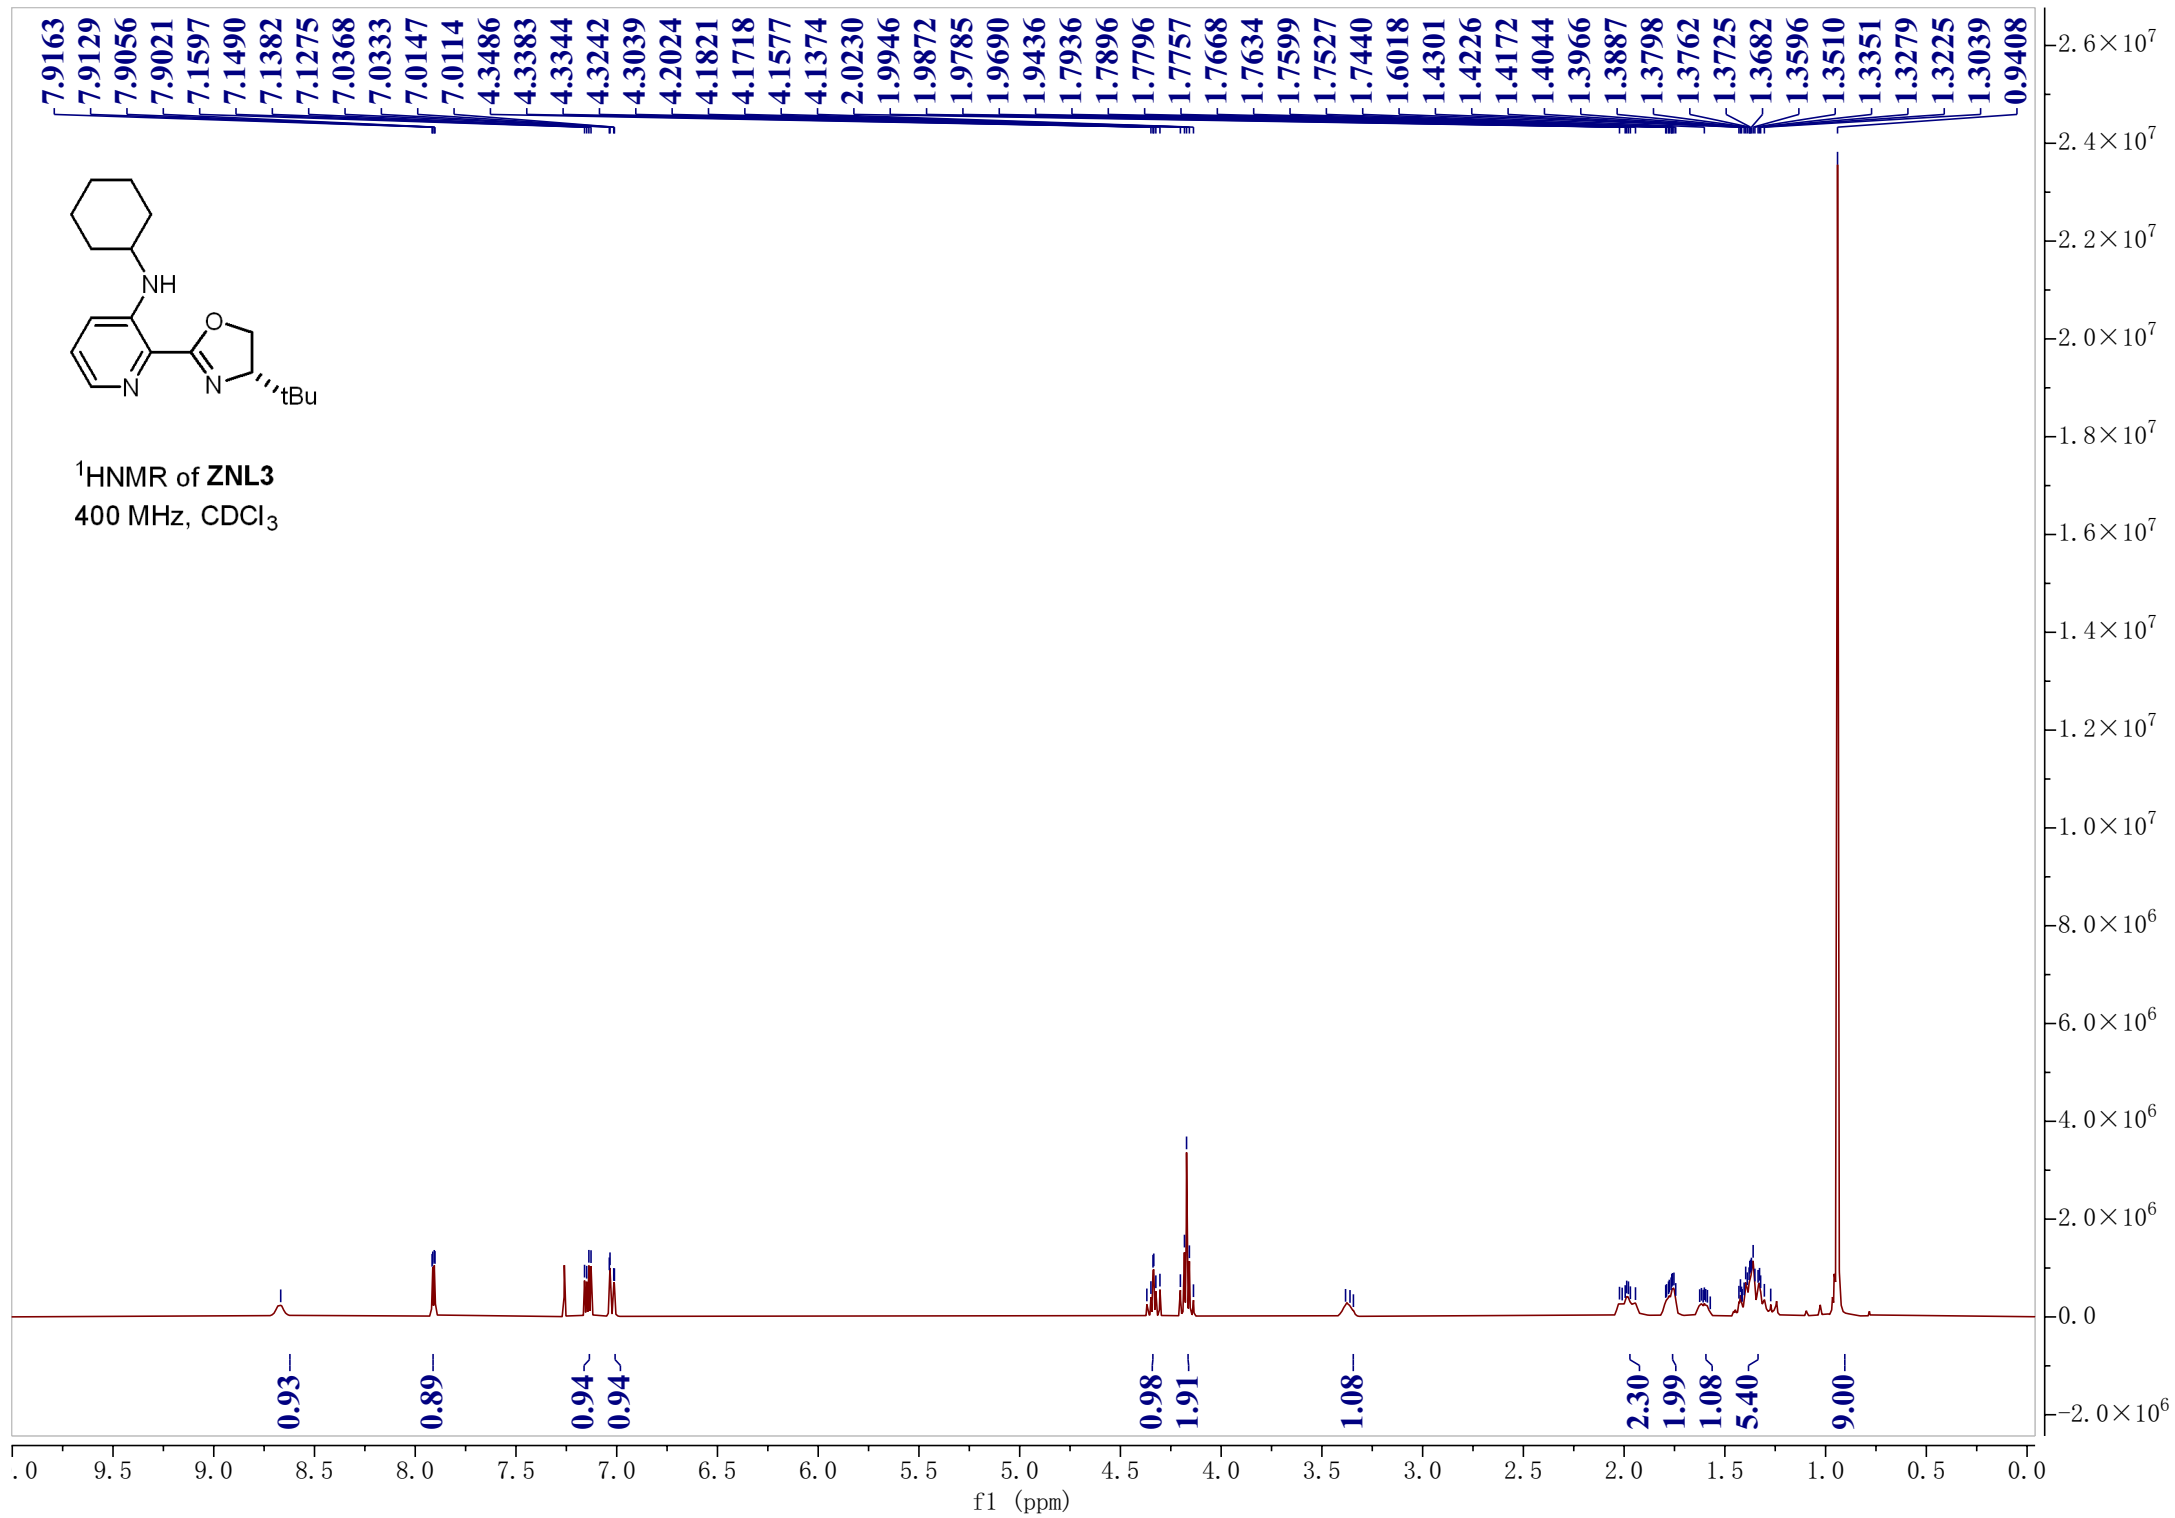

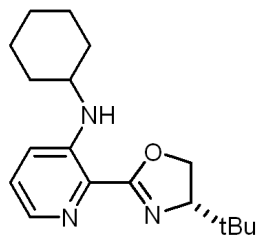

<sup>13</sup>CNMR of ZNL3  
101 MHz, CDCl<sub>3</sub>

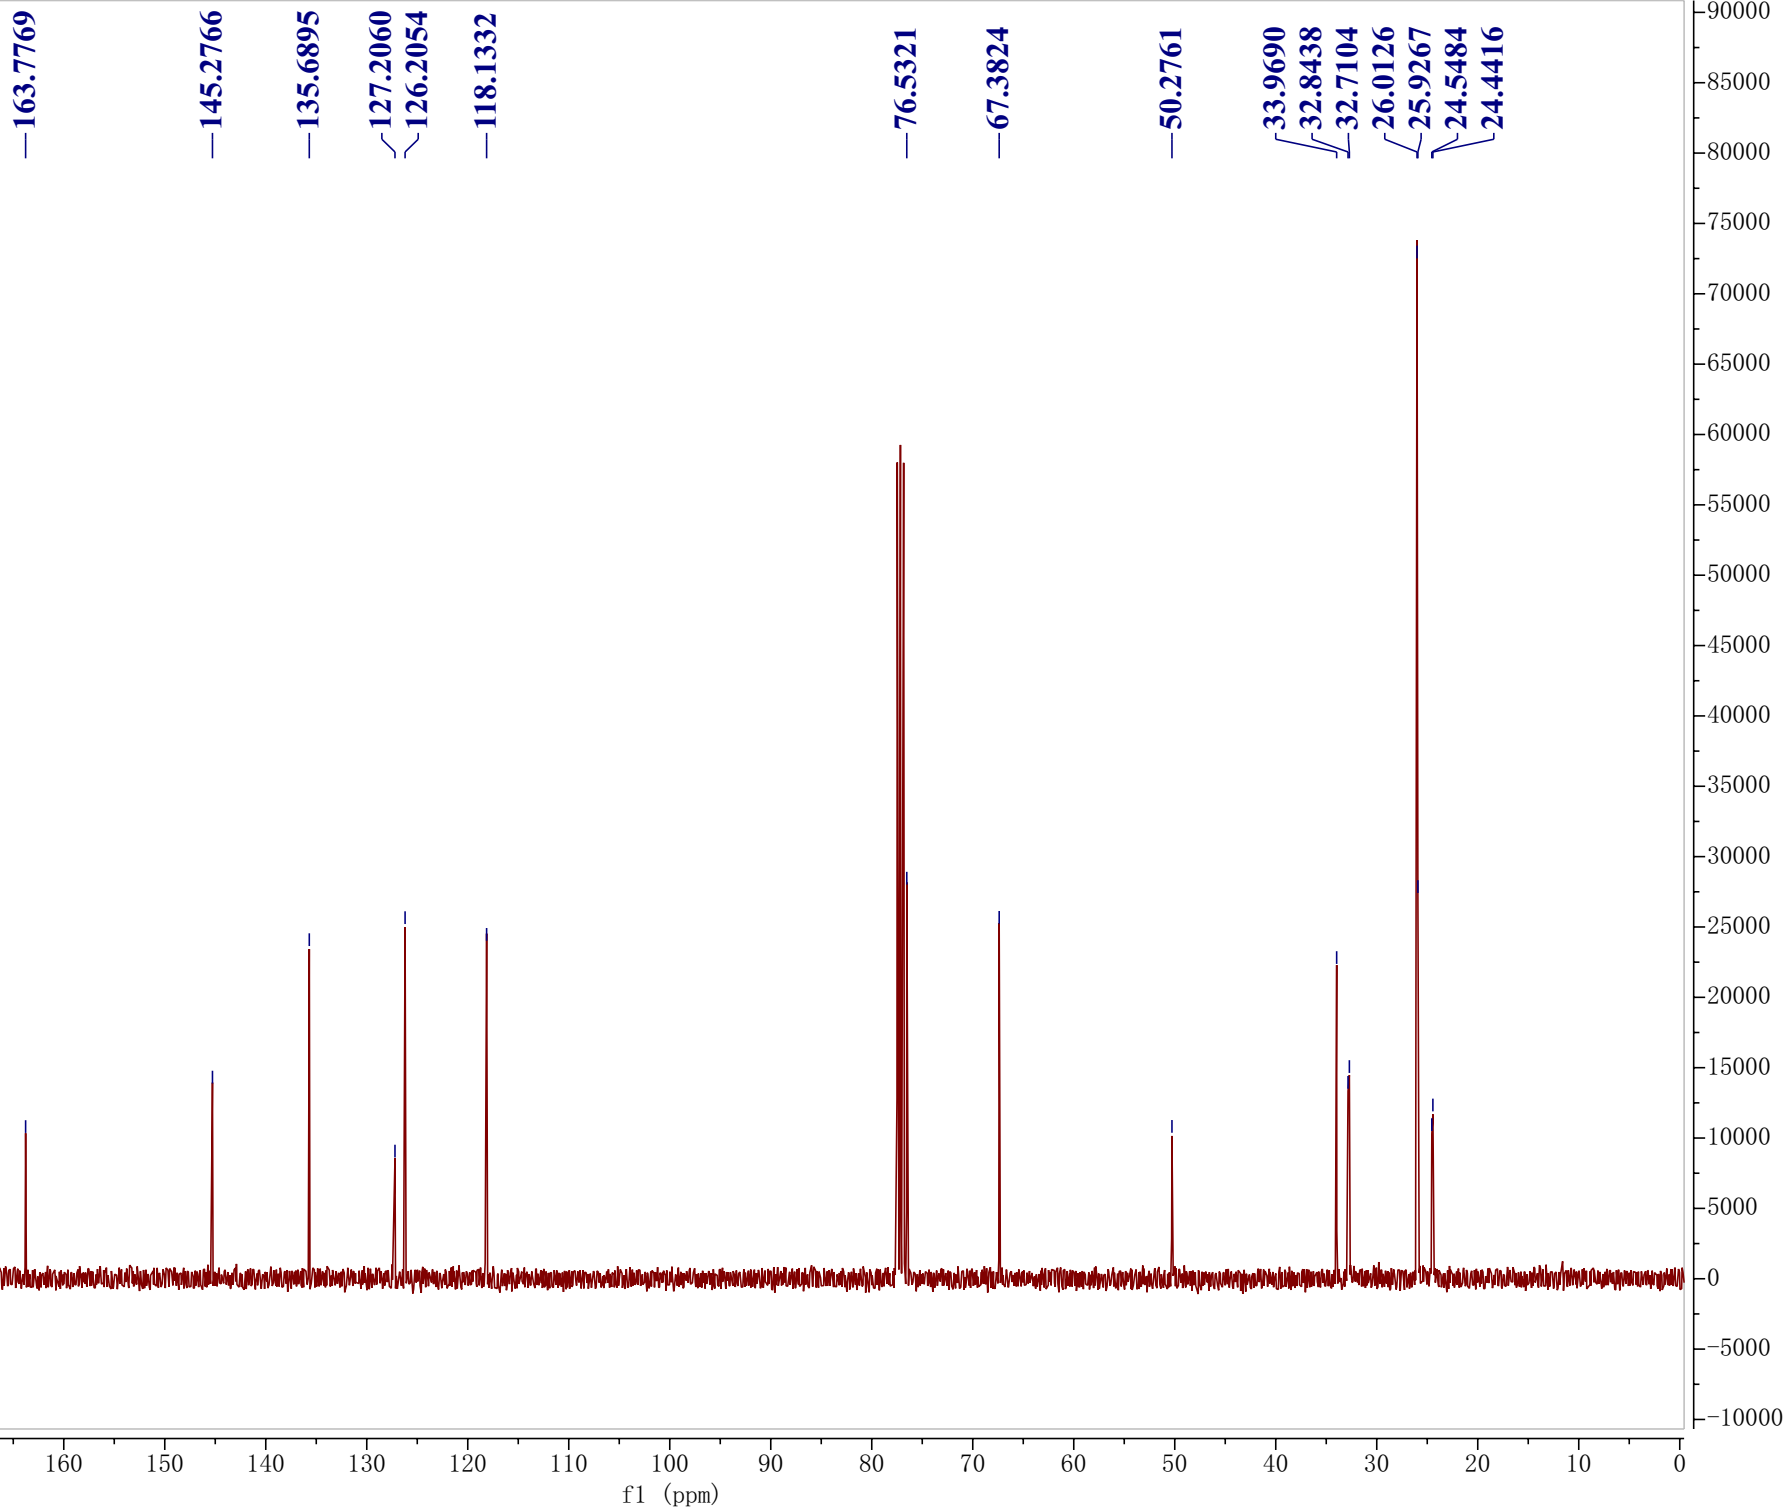



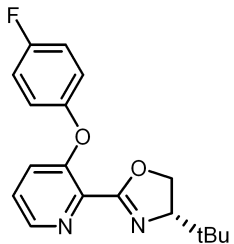

<sup>1</sup>H NMR of OL11  
500 MZH, CDCl<sub>3</sub>

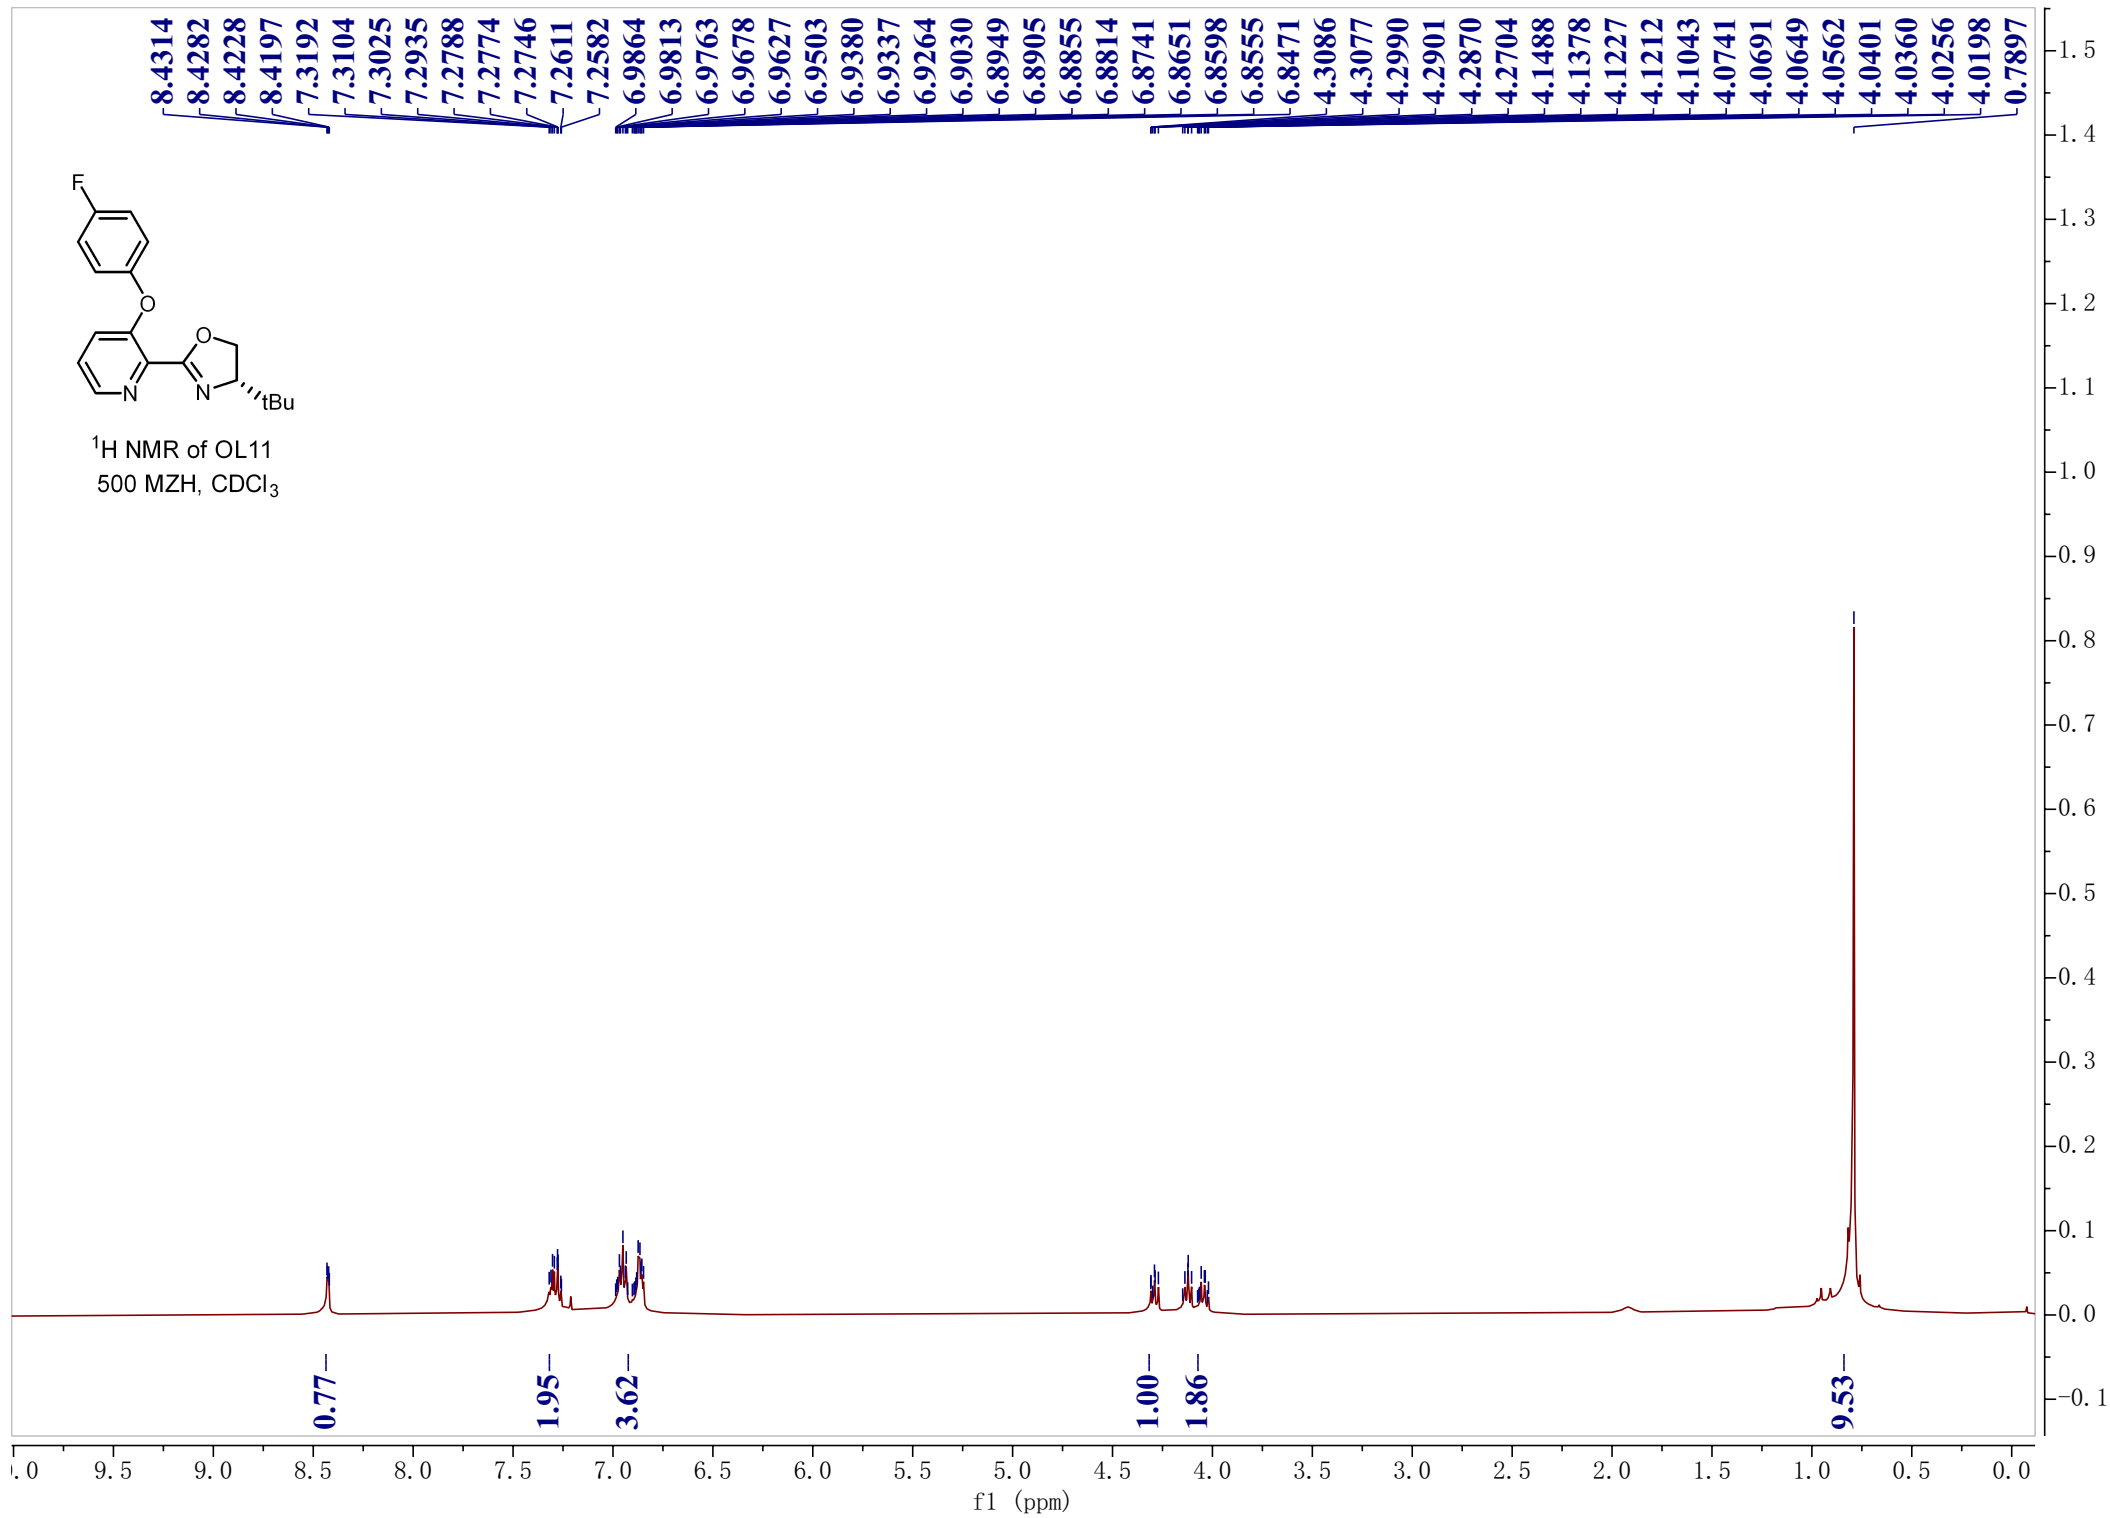

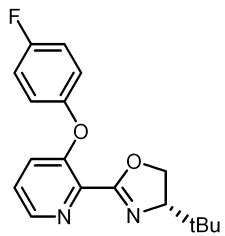

<sup>13</sup>C NMR of OL11  
101 MZH, CDCl<sub>3</sub>

160.2118  
160.0455  
157.8058  
153.0187  
152.9045  
152.8794  
144.8849  
139.8309  
128.2404  
126.3811  
119.7196  
119.6362  
116.6672  
116.4344

77.0244

68.7384

33.9621

25.8802

f1 (ppm)

10000  
9000  
8000  
7000  
6000  
5000  
4000  
3000  
2000  
1000  
0  
-1000

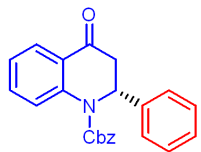

<sup>1</sup>H NMR of **3**  
400 MHz, CDCl<sub>3</sub>

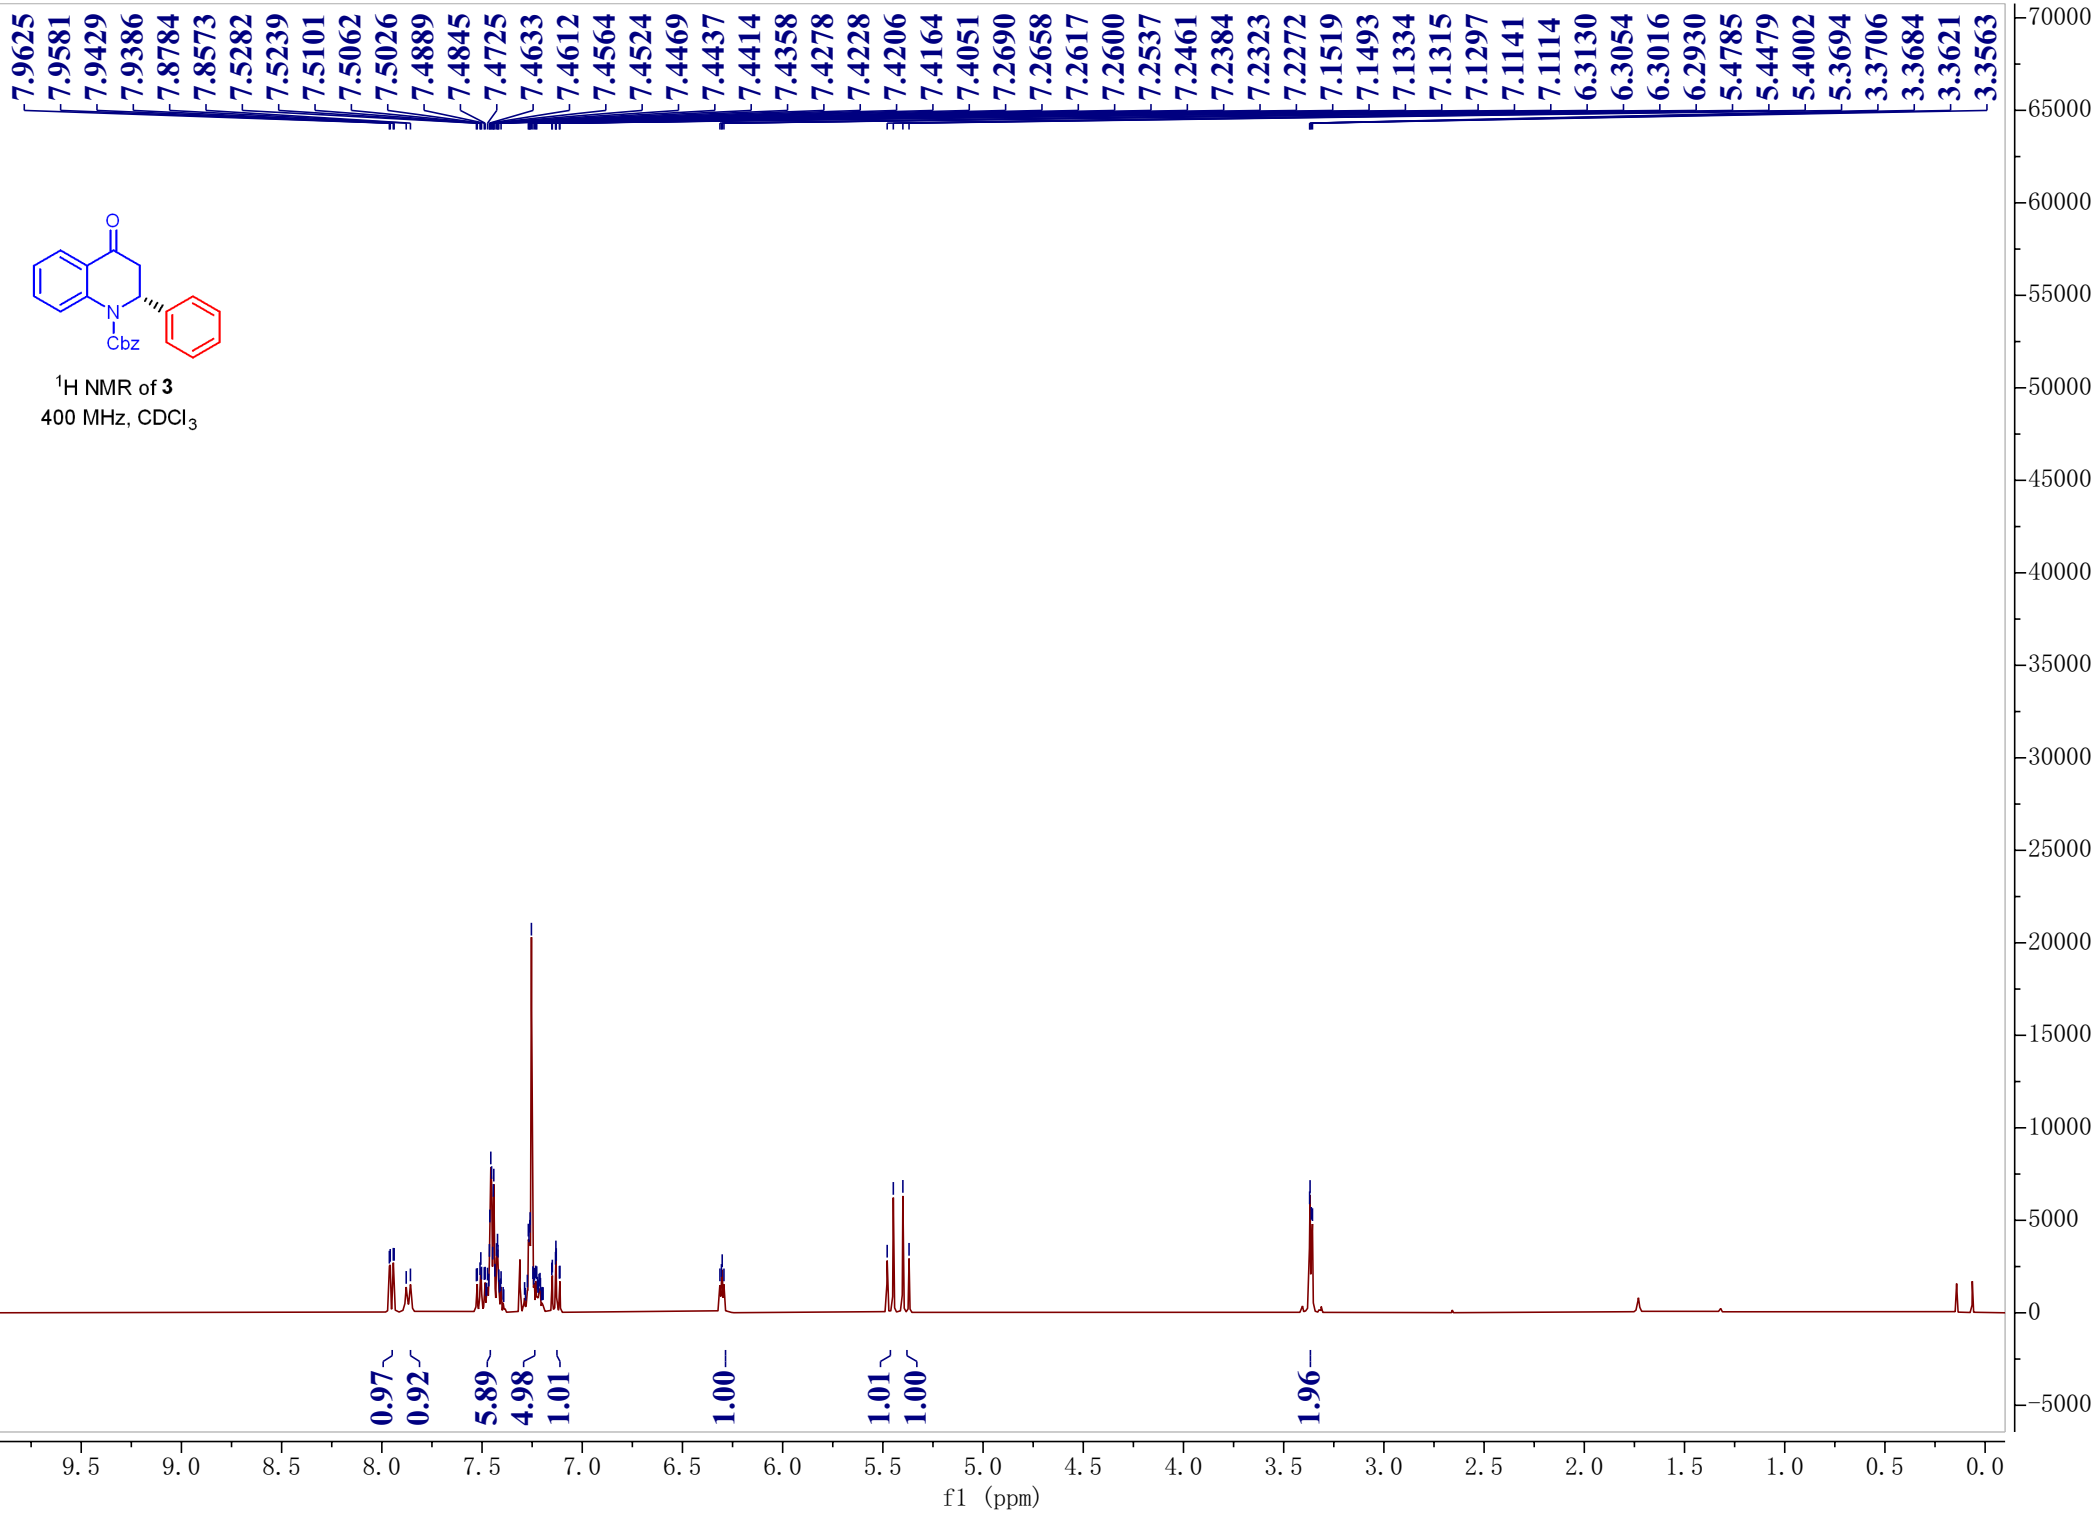

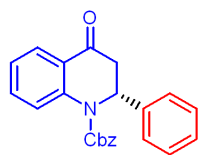

<sup>13</sup>C NMR of 3  
101 MHz, CDCl<sub>3</sub>

192.8293  
154.4113  
141.5765  
138.1558  
135.6852  
134.6746  
128.8085  
128.7427  
128.6005  
128.2773  
127.6814  
126.9822  
126.6659  
125.1479  
124.5215  
124.3115  
68.6281  
56.2340  
42.4284

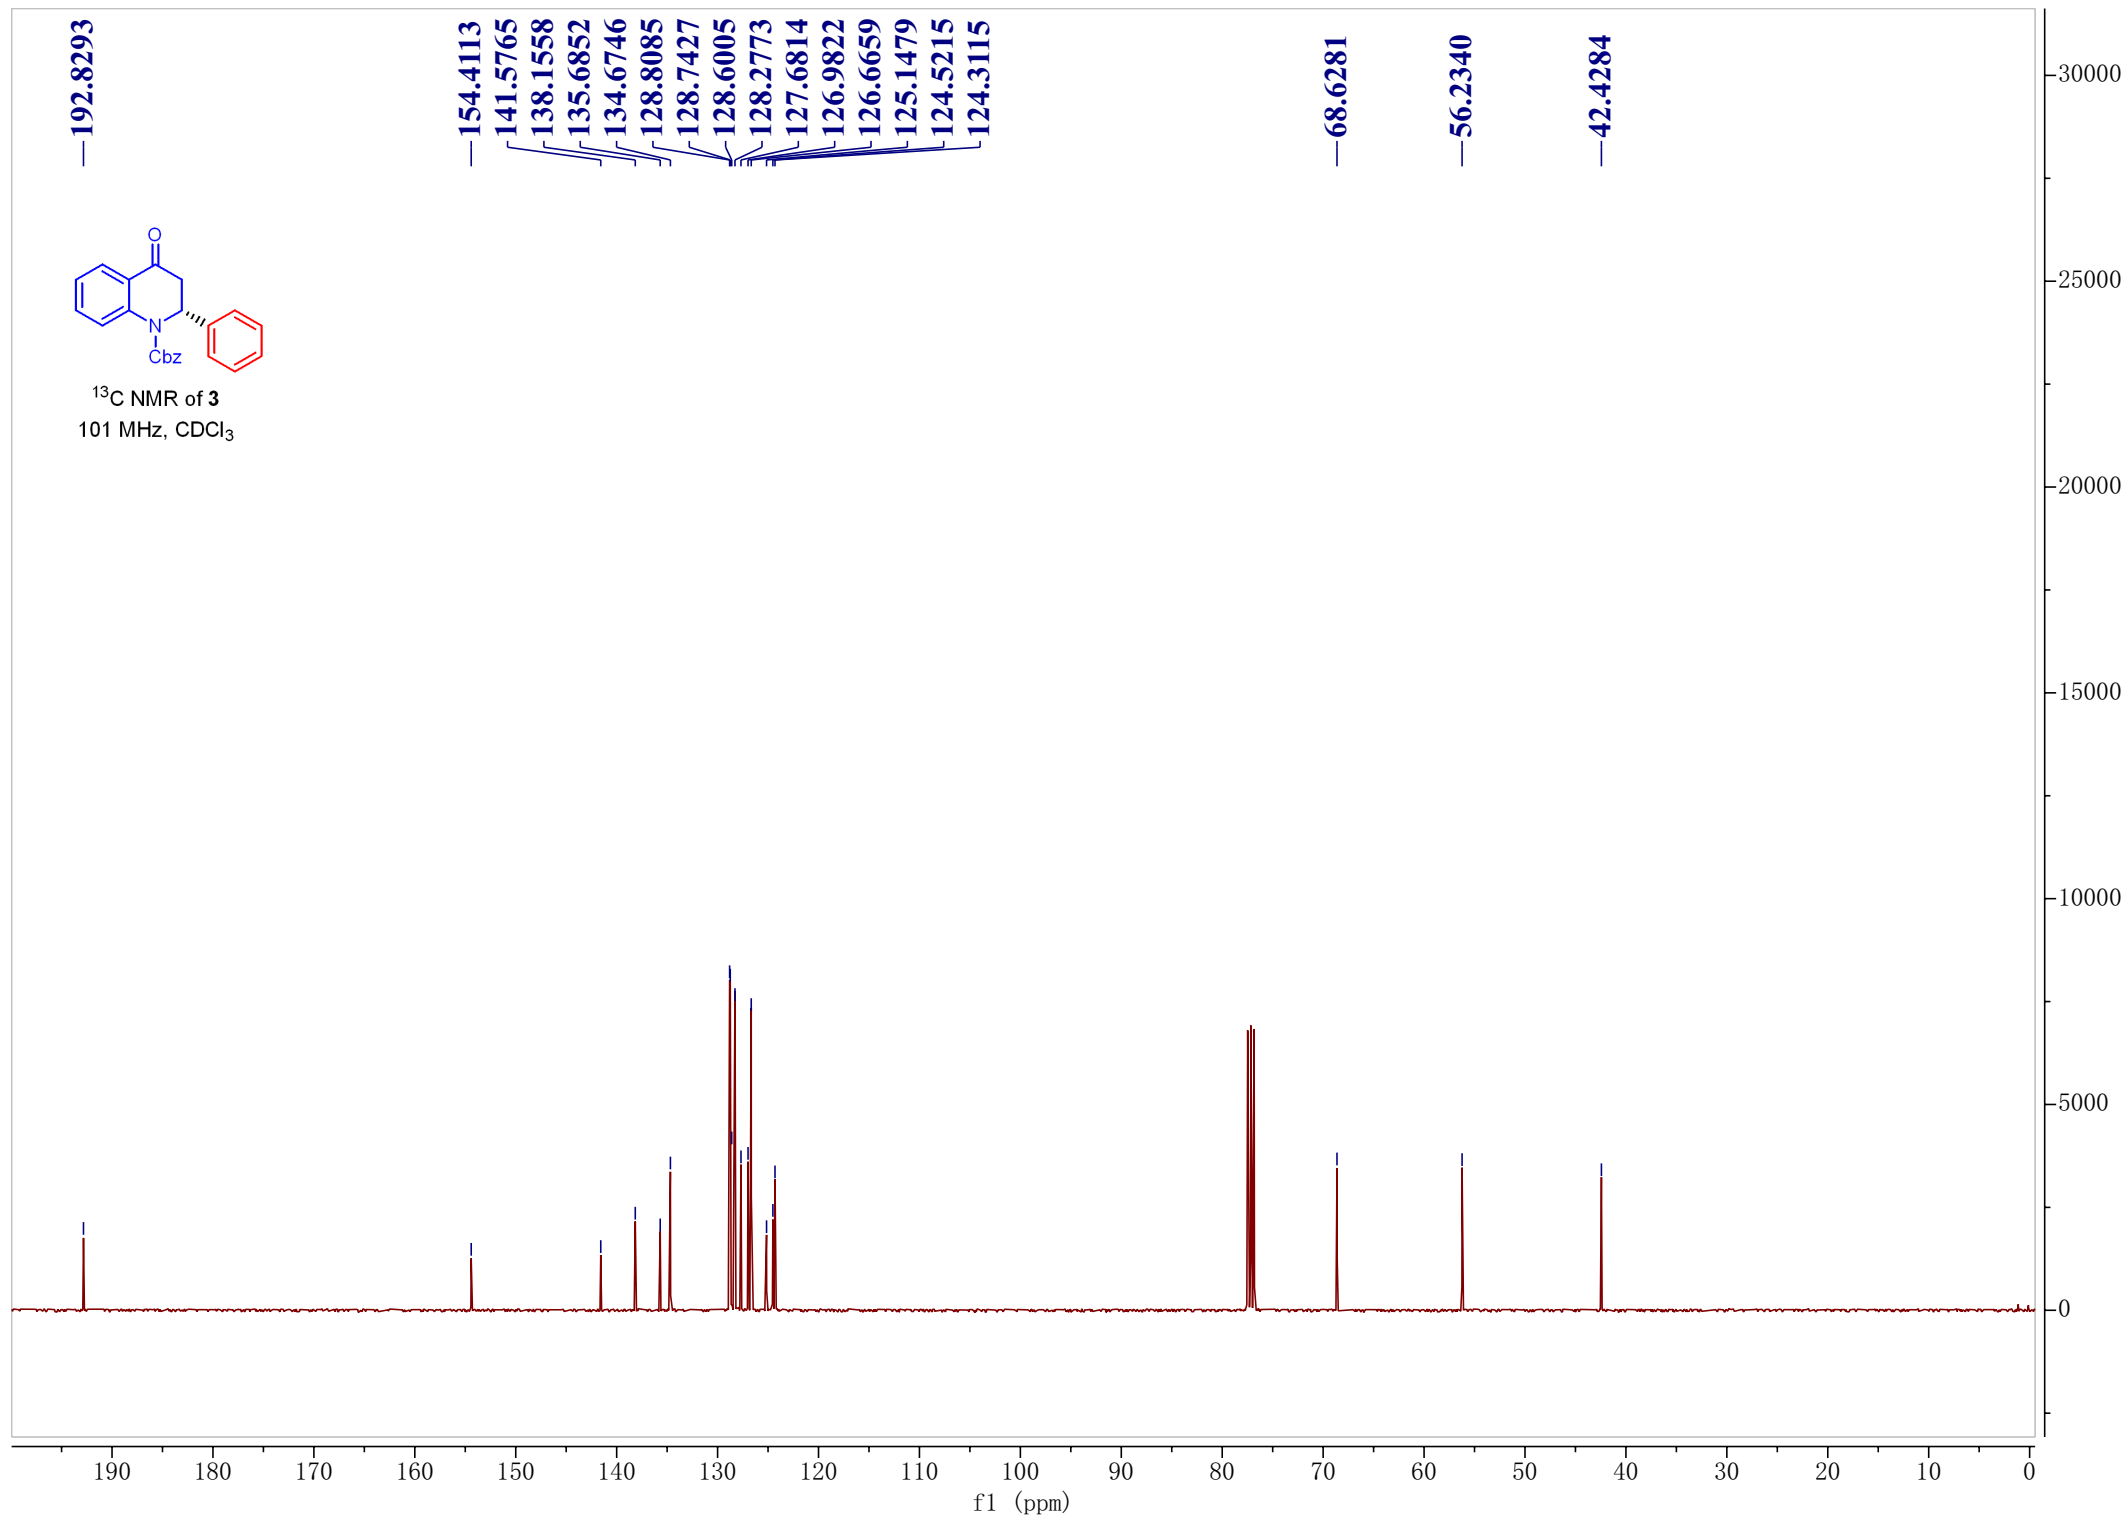

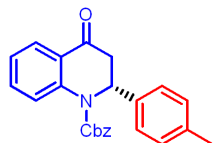

<sup>1</sup>H NMR of 4  
500 MHz CDCl<sub>3</sub>

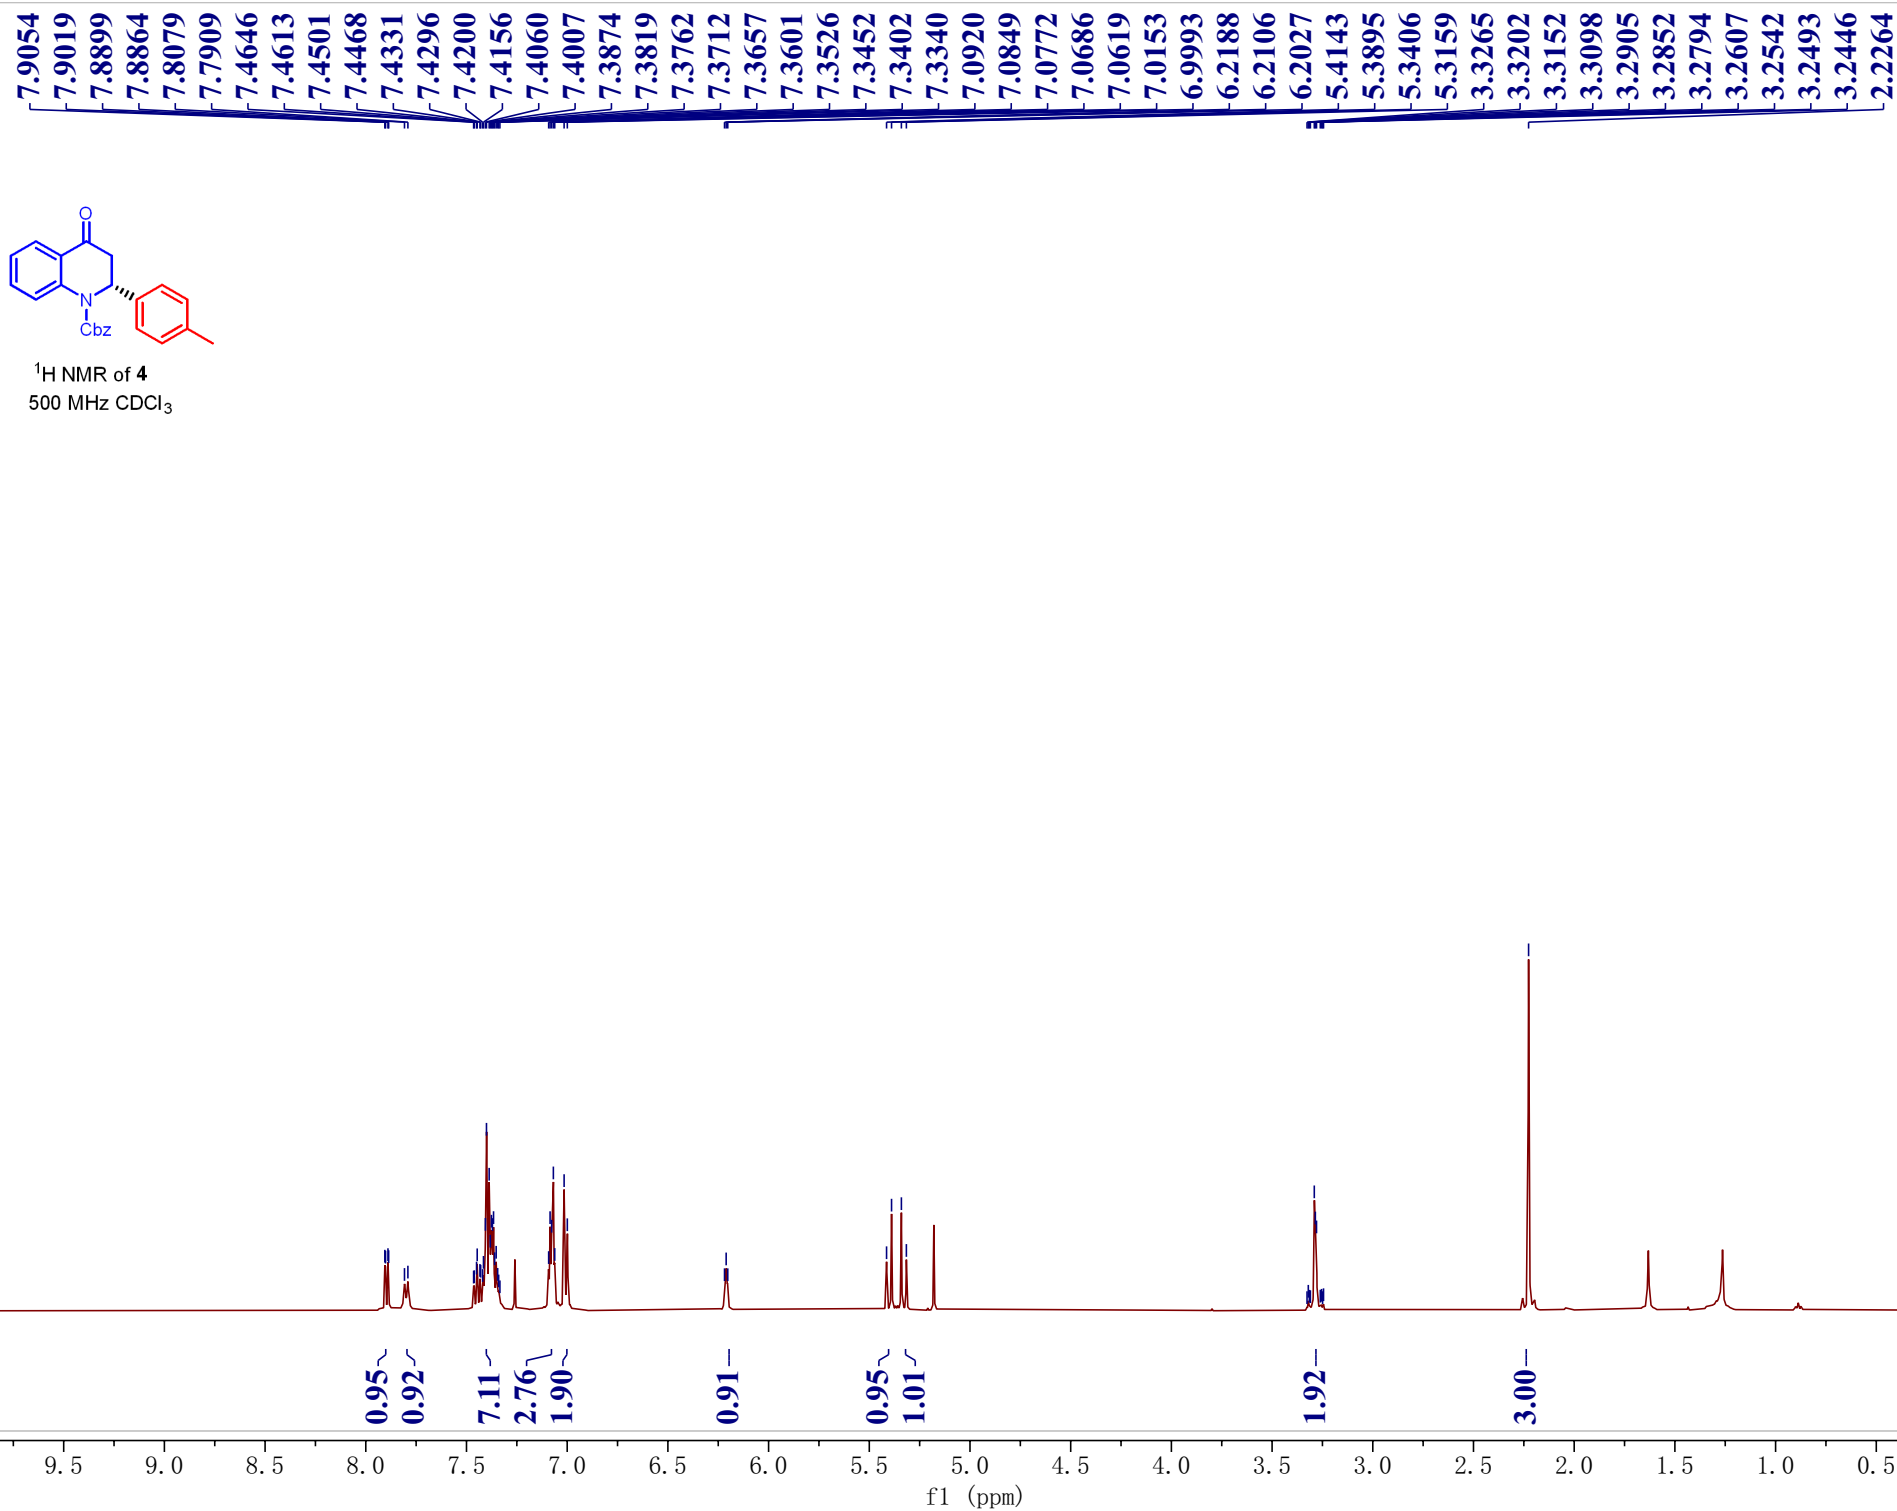

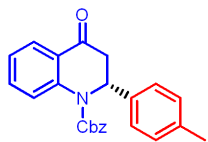

<sup>13</sup>C NMR of **4**  
101 MHz CDCl<sub>3</sub>

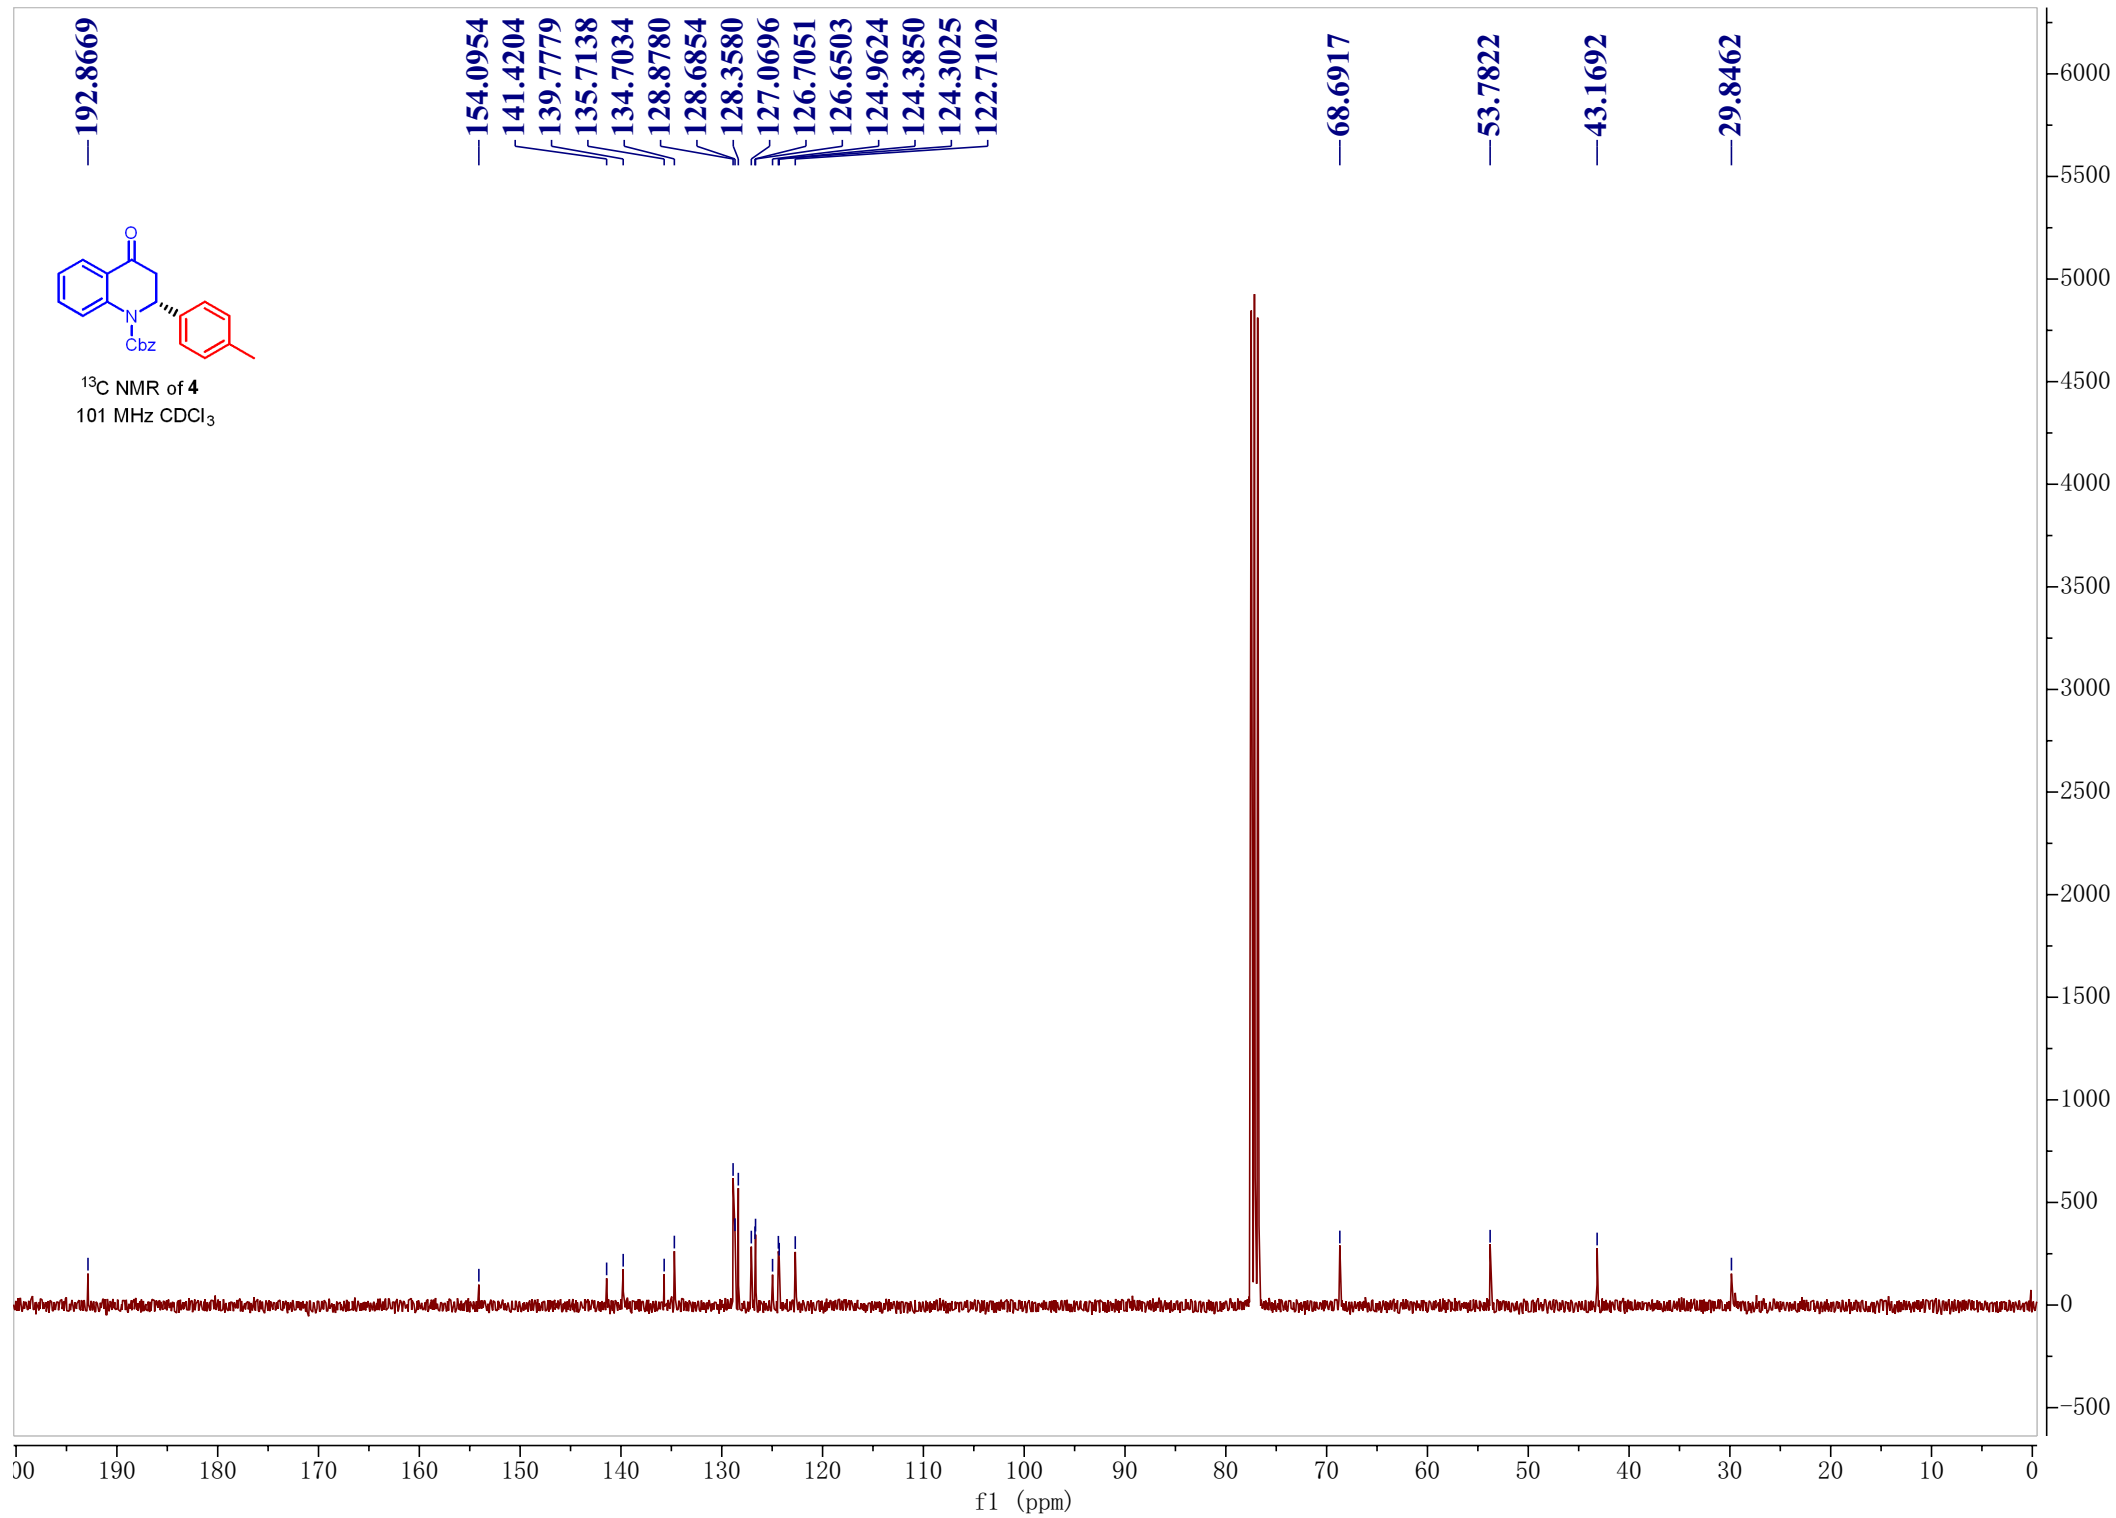

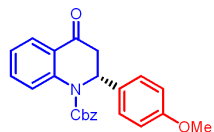

<sup>1</sup>H NMR of **5**  
500 MHz CDCl<sub>3</sub>

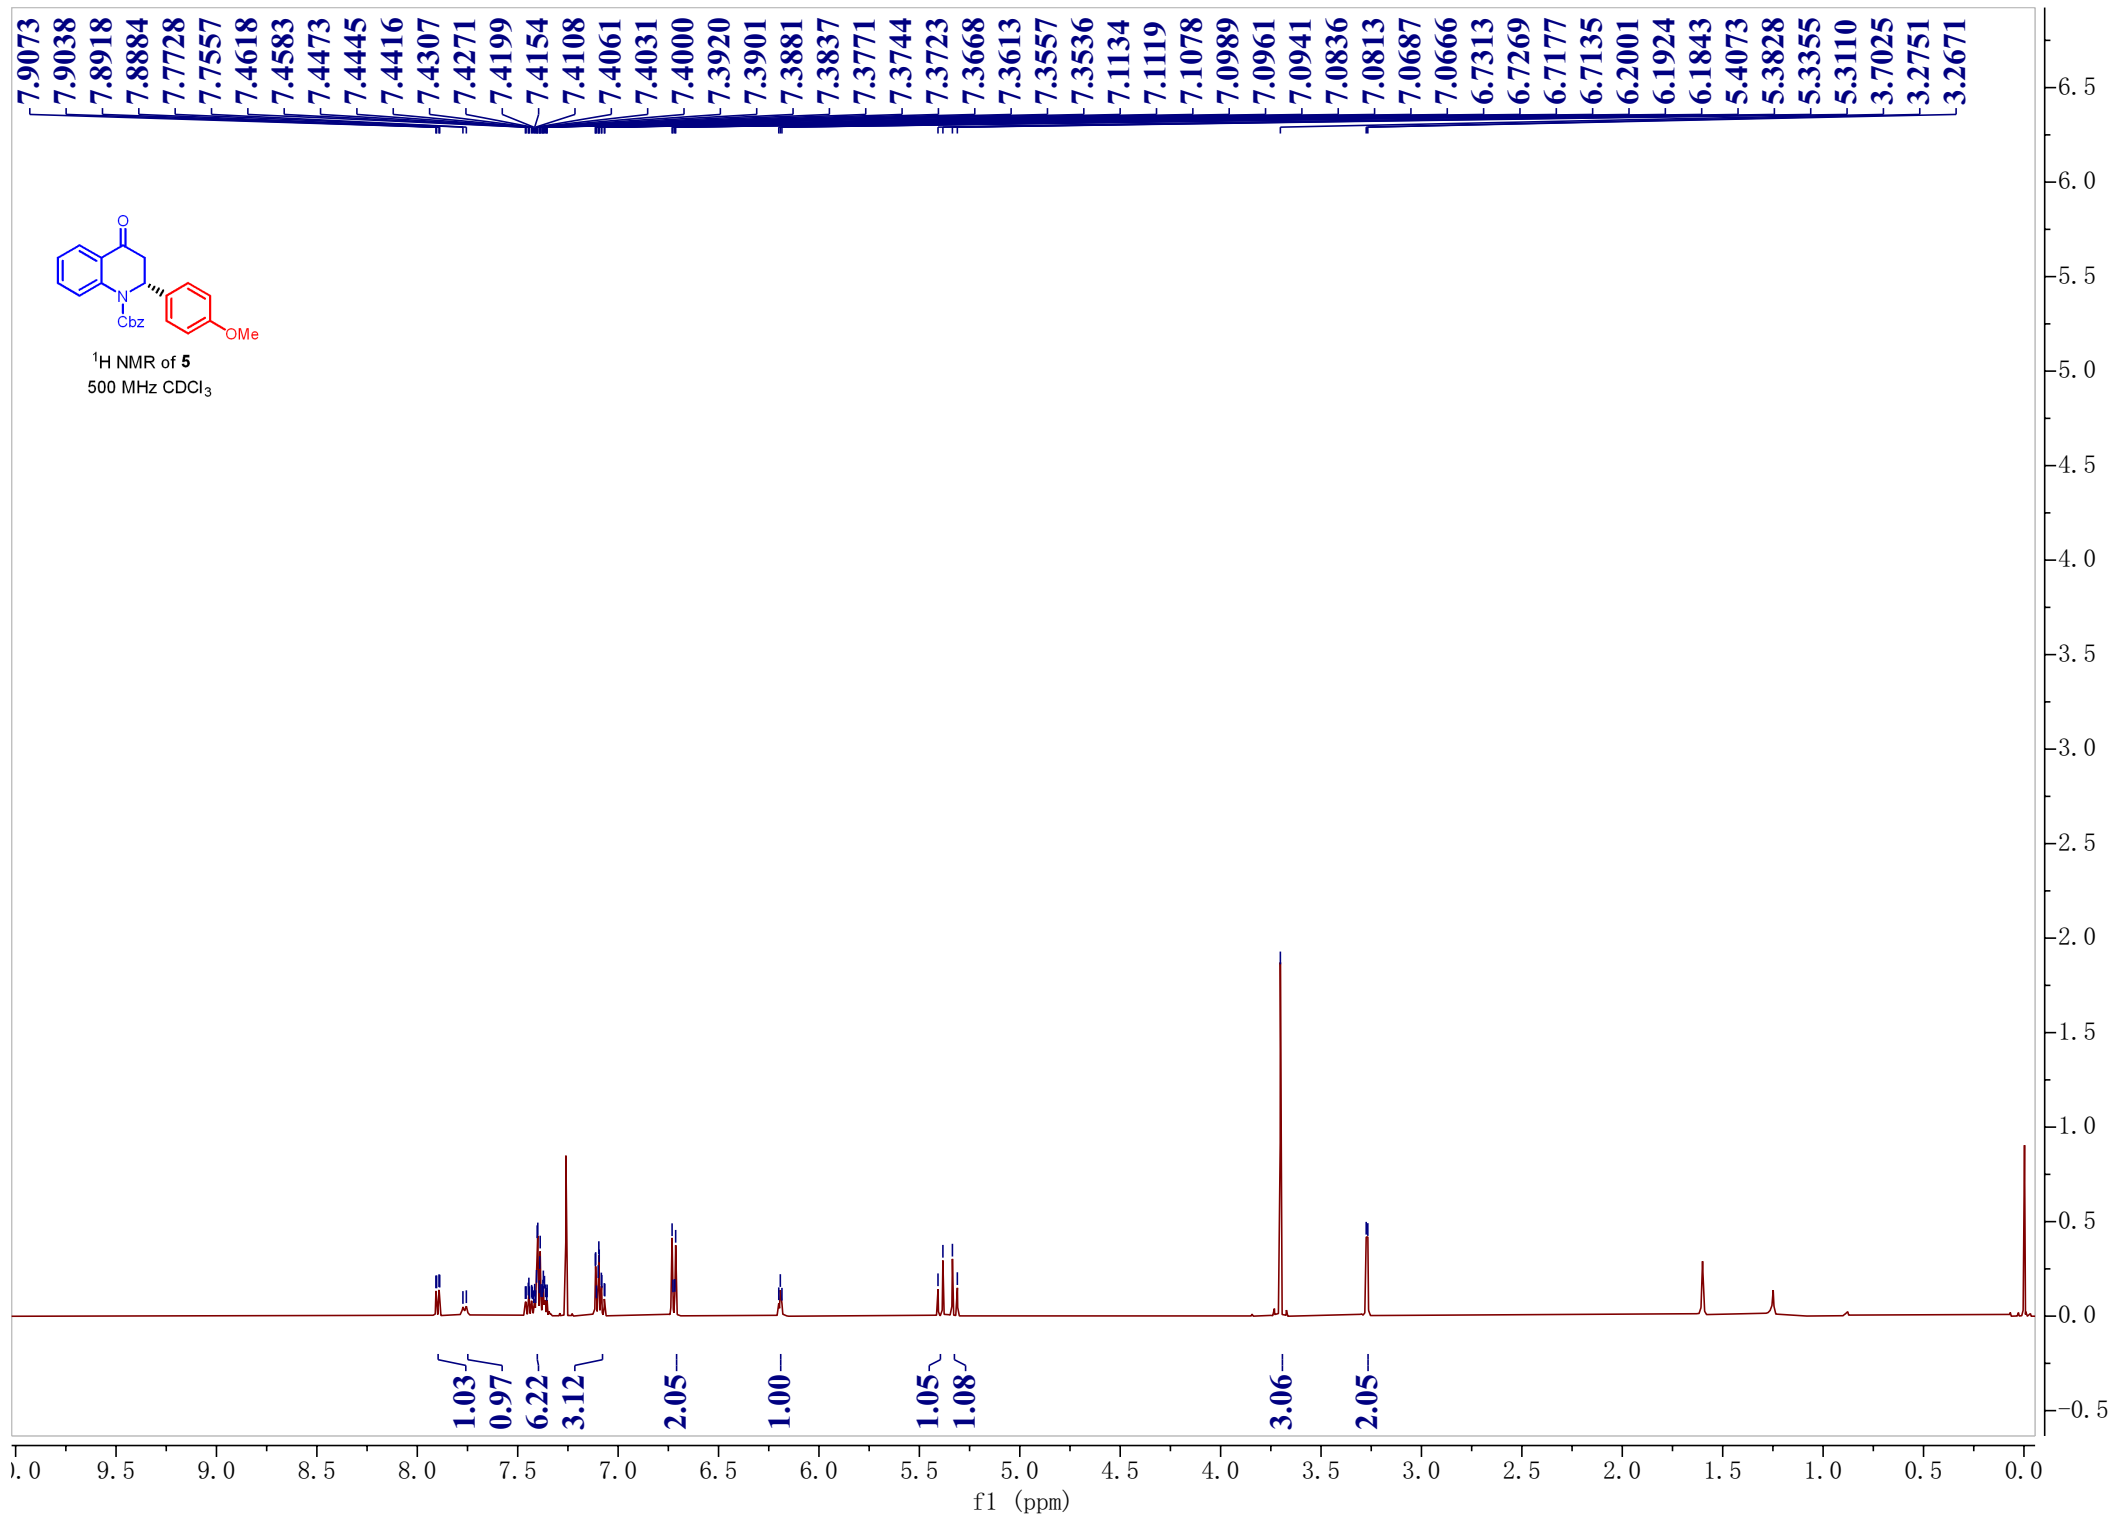

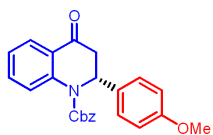

<sup>13</sup>C NMR of **5**  
126 MHz CDCl<sub>3</sub>

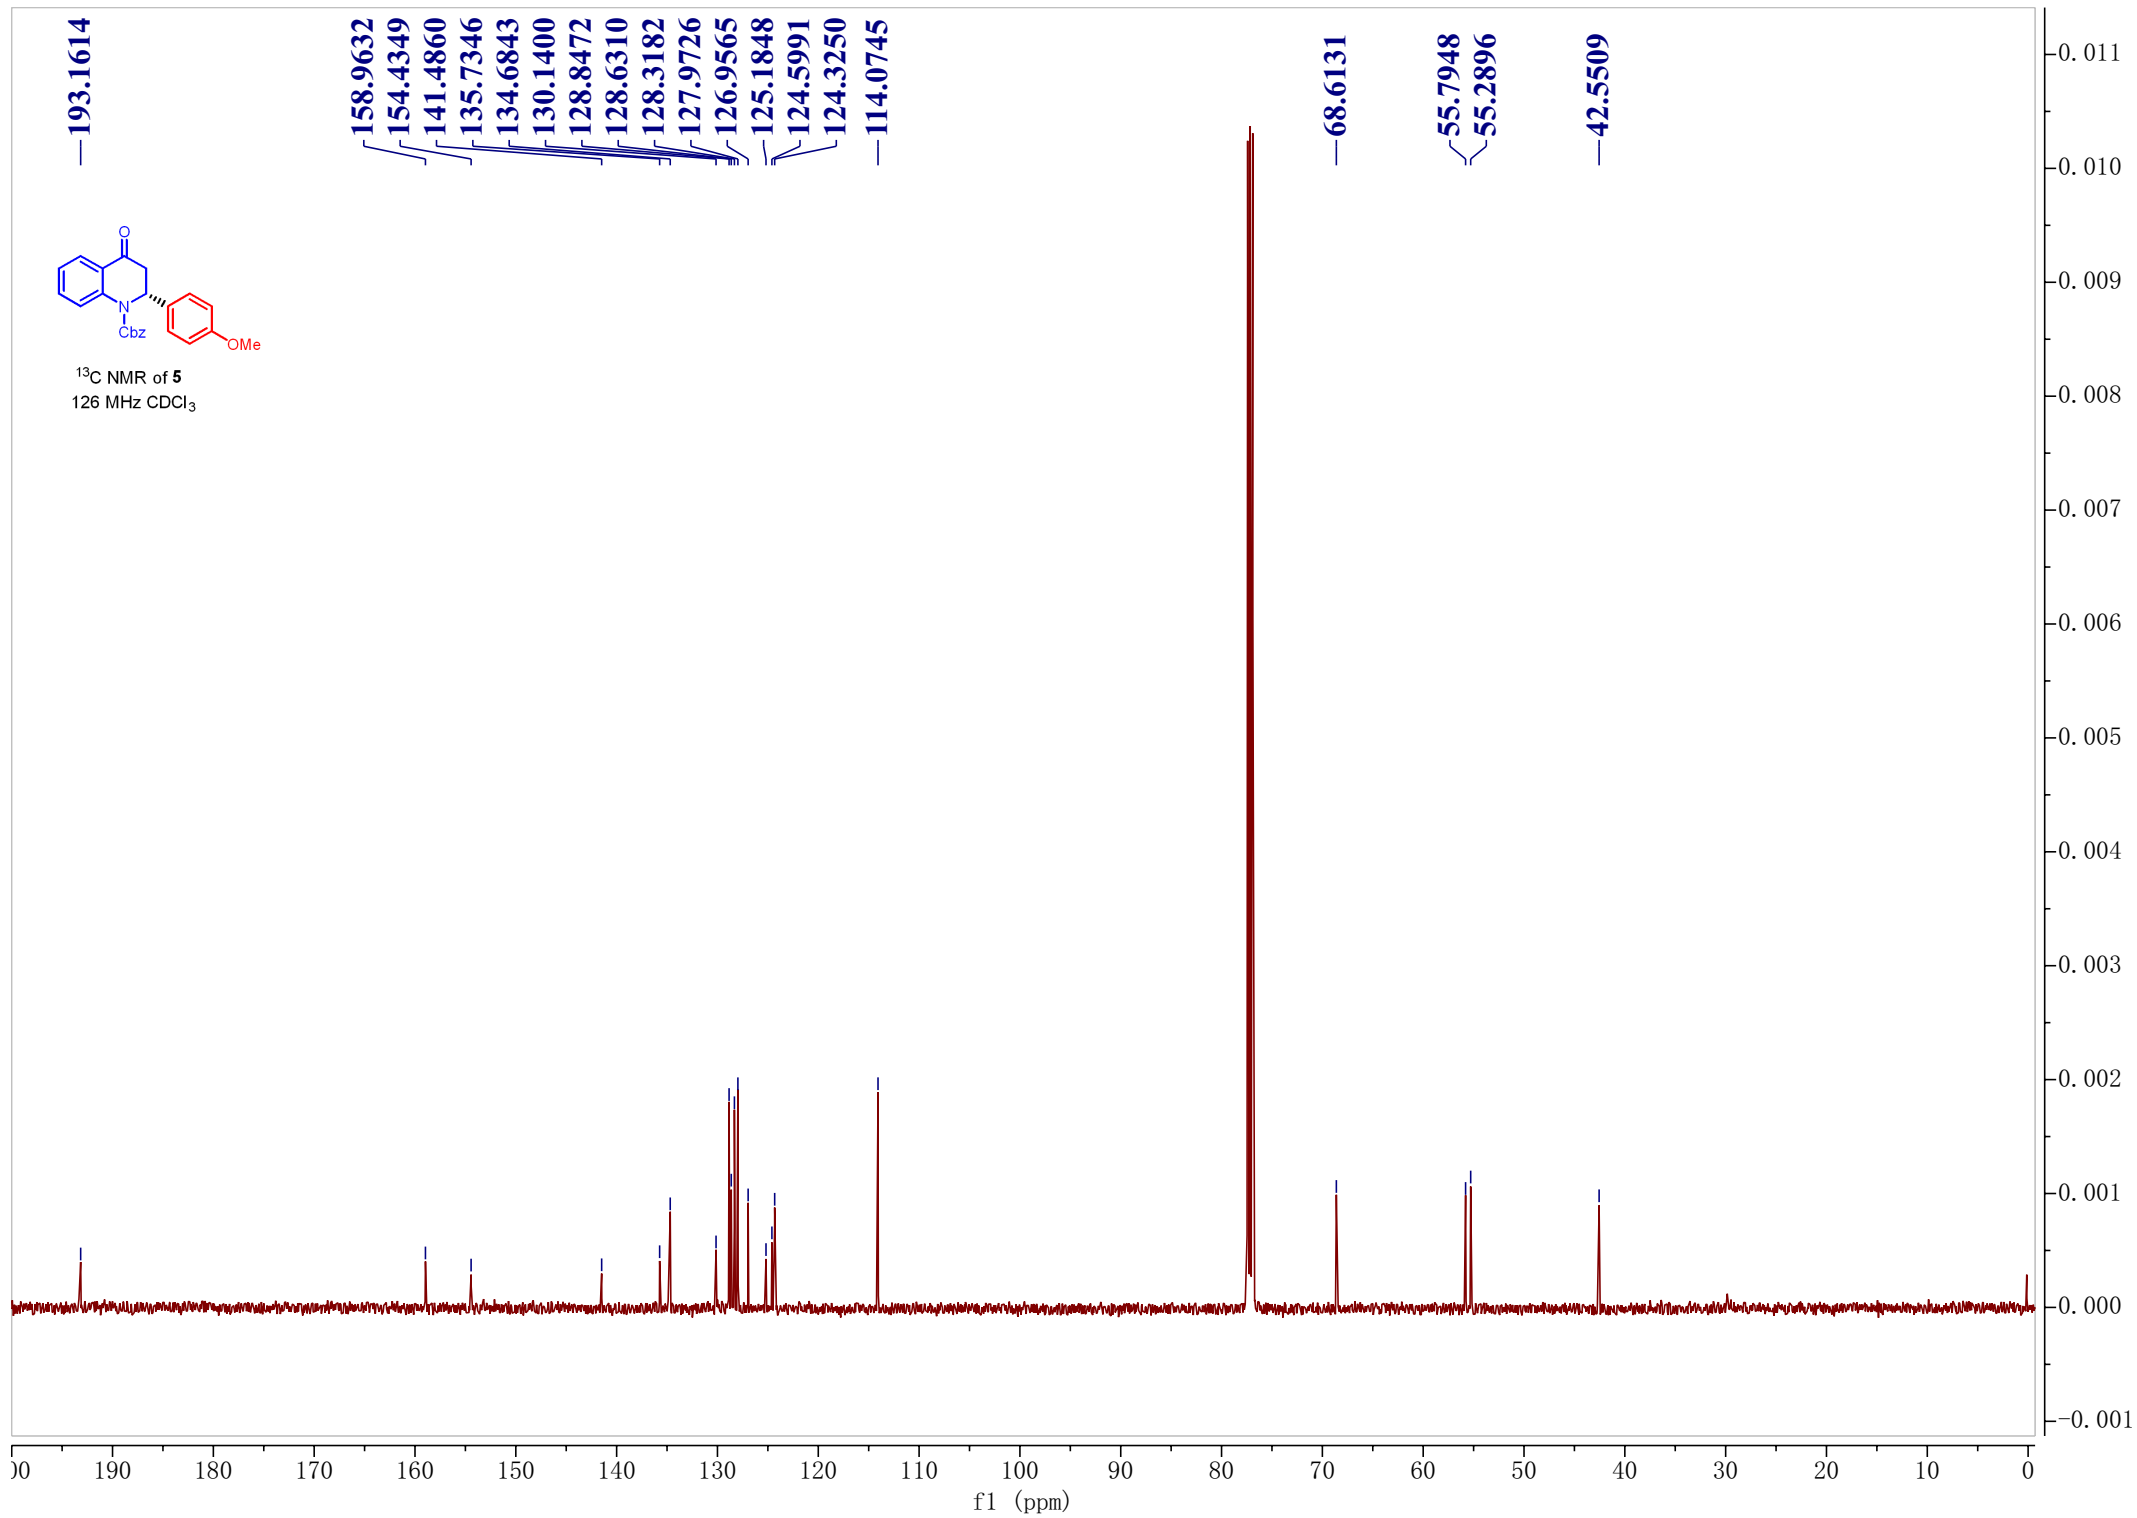



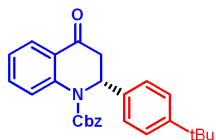

<sup>1</sup>H NMR of 6  
500 MHz CDCl<sub>3</sub>

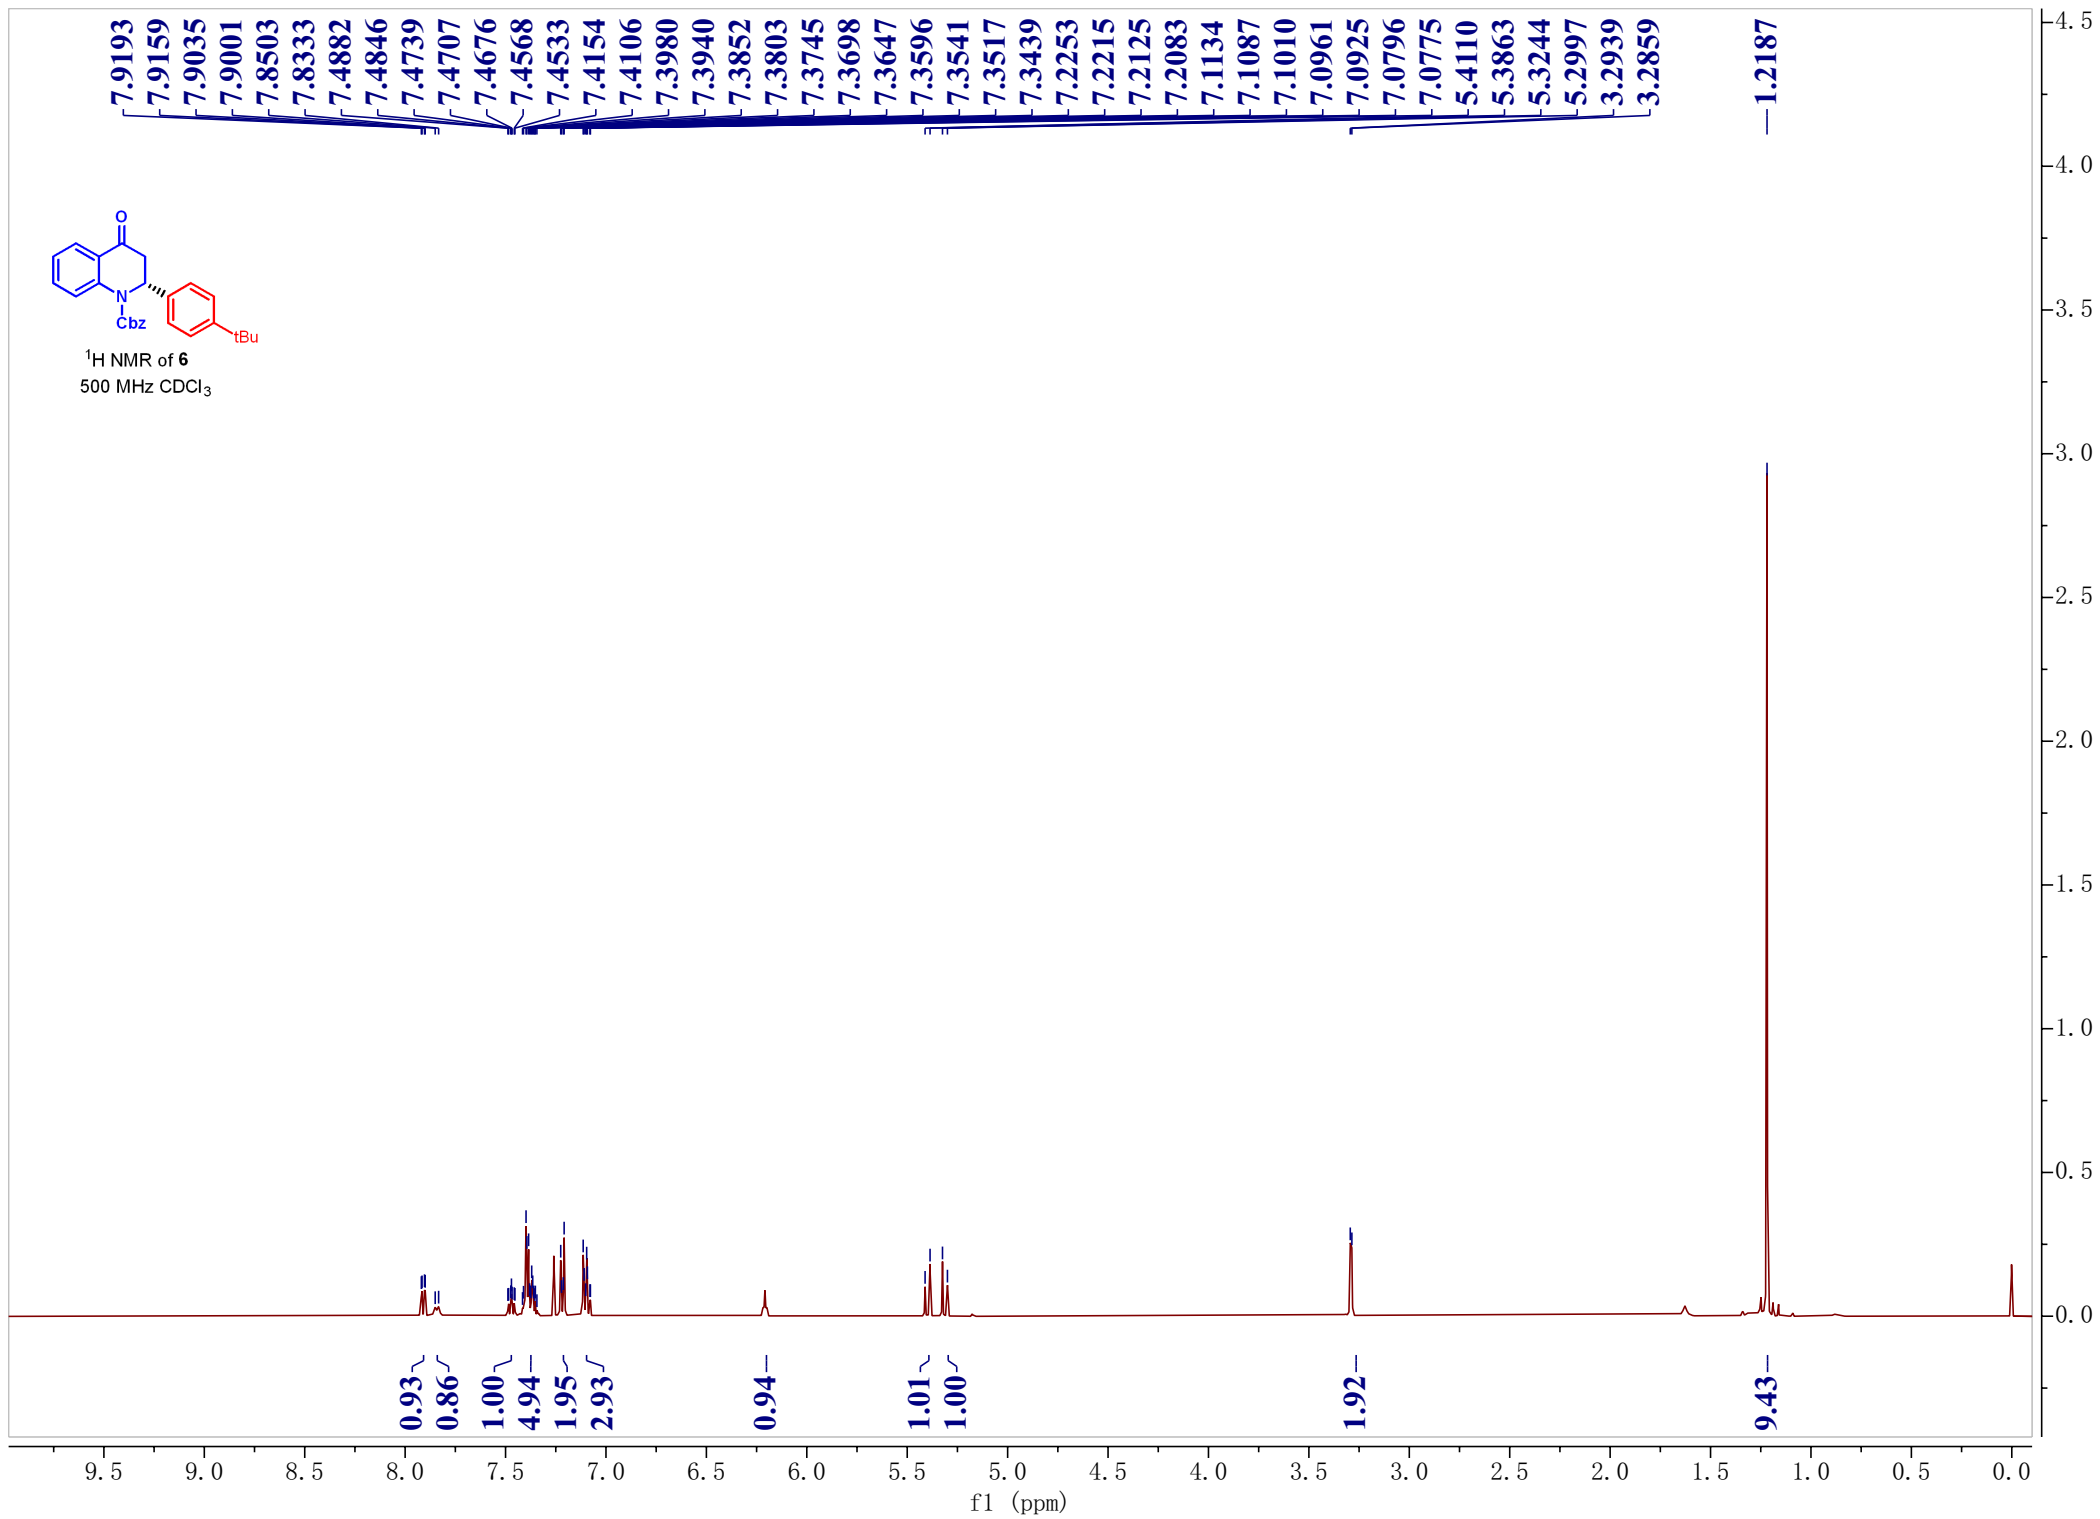

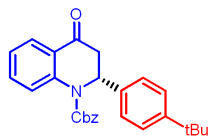

<sup>13</sup>C NMR of **6**  
126 MHz CDCl<sub>3</sub>

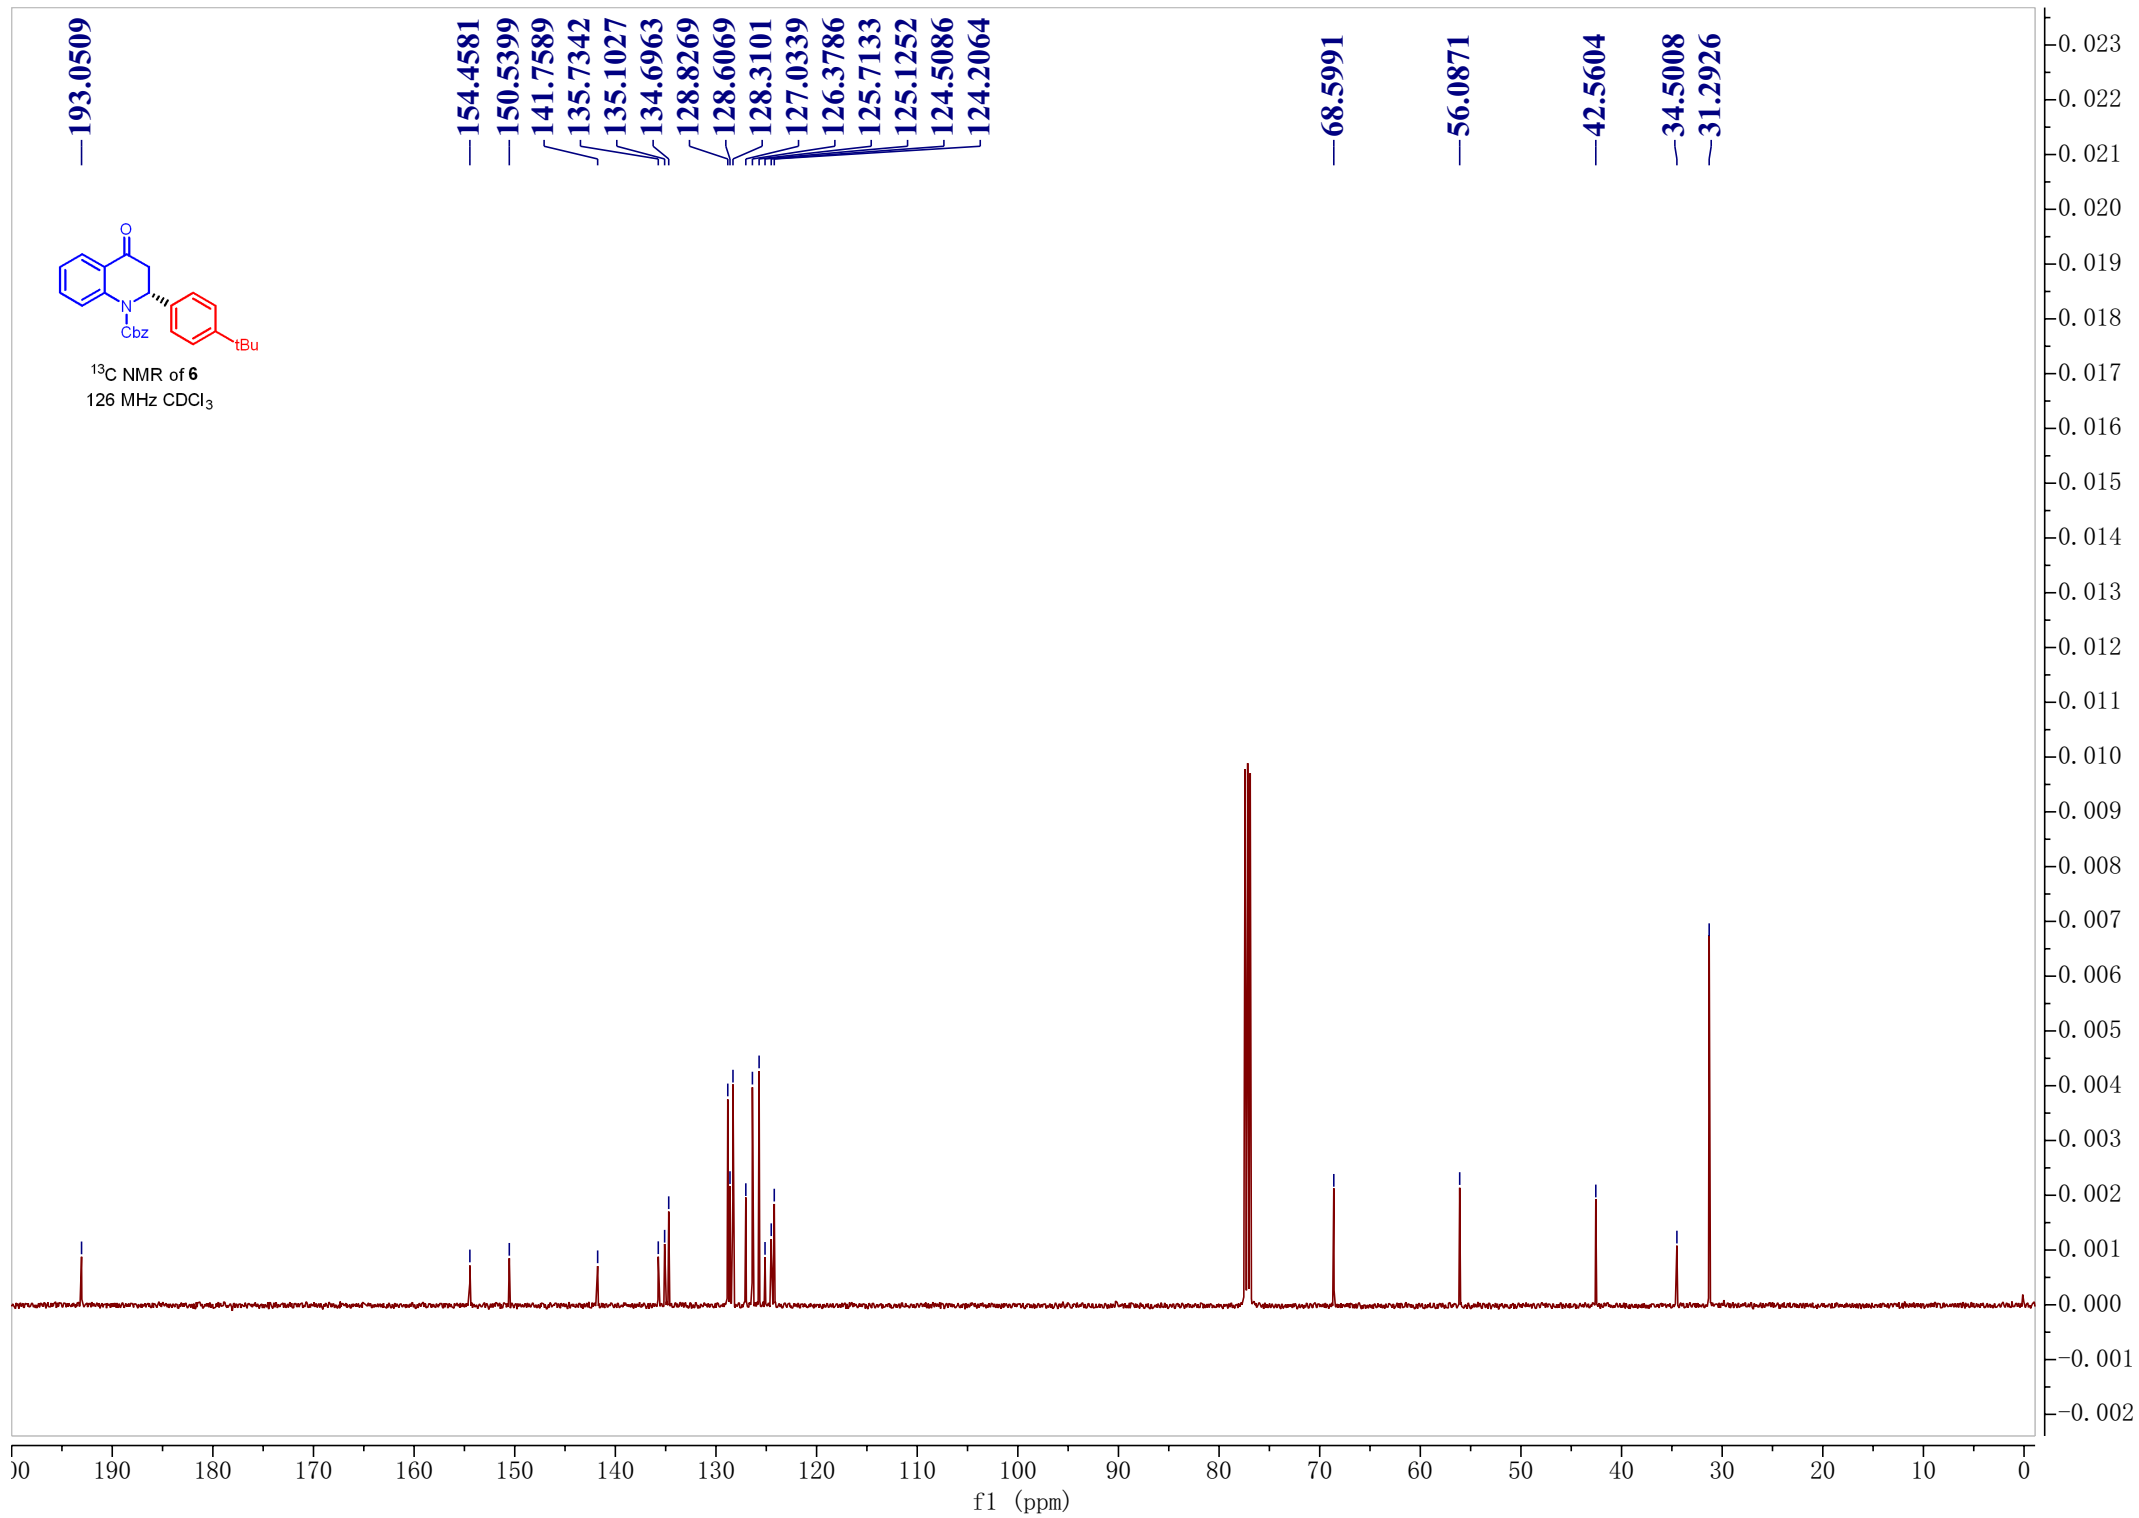

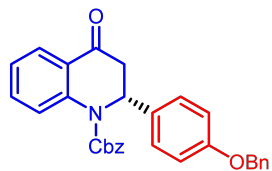

<sup>1</sup>H NMR of 7  
500 MHz CDCl<sub>3</sub>

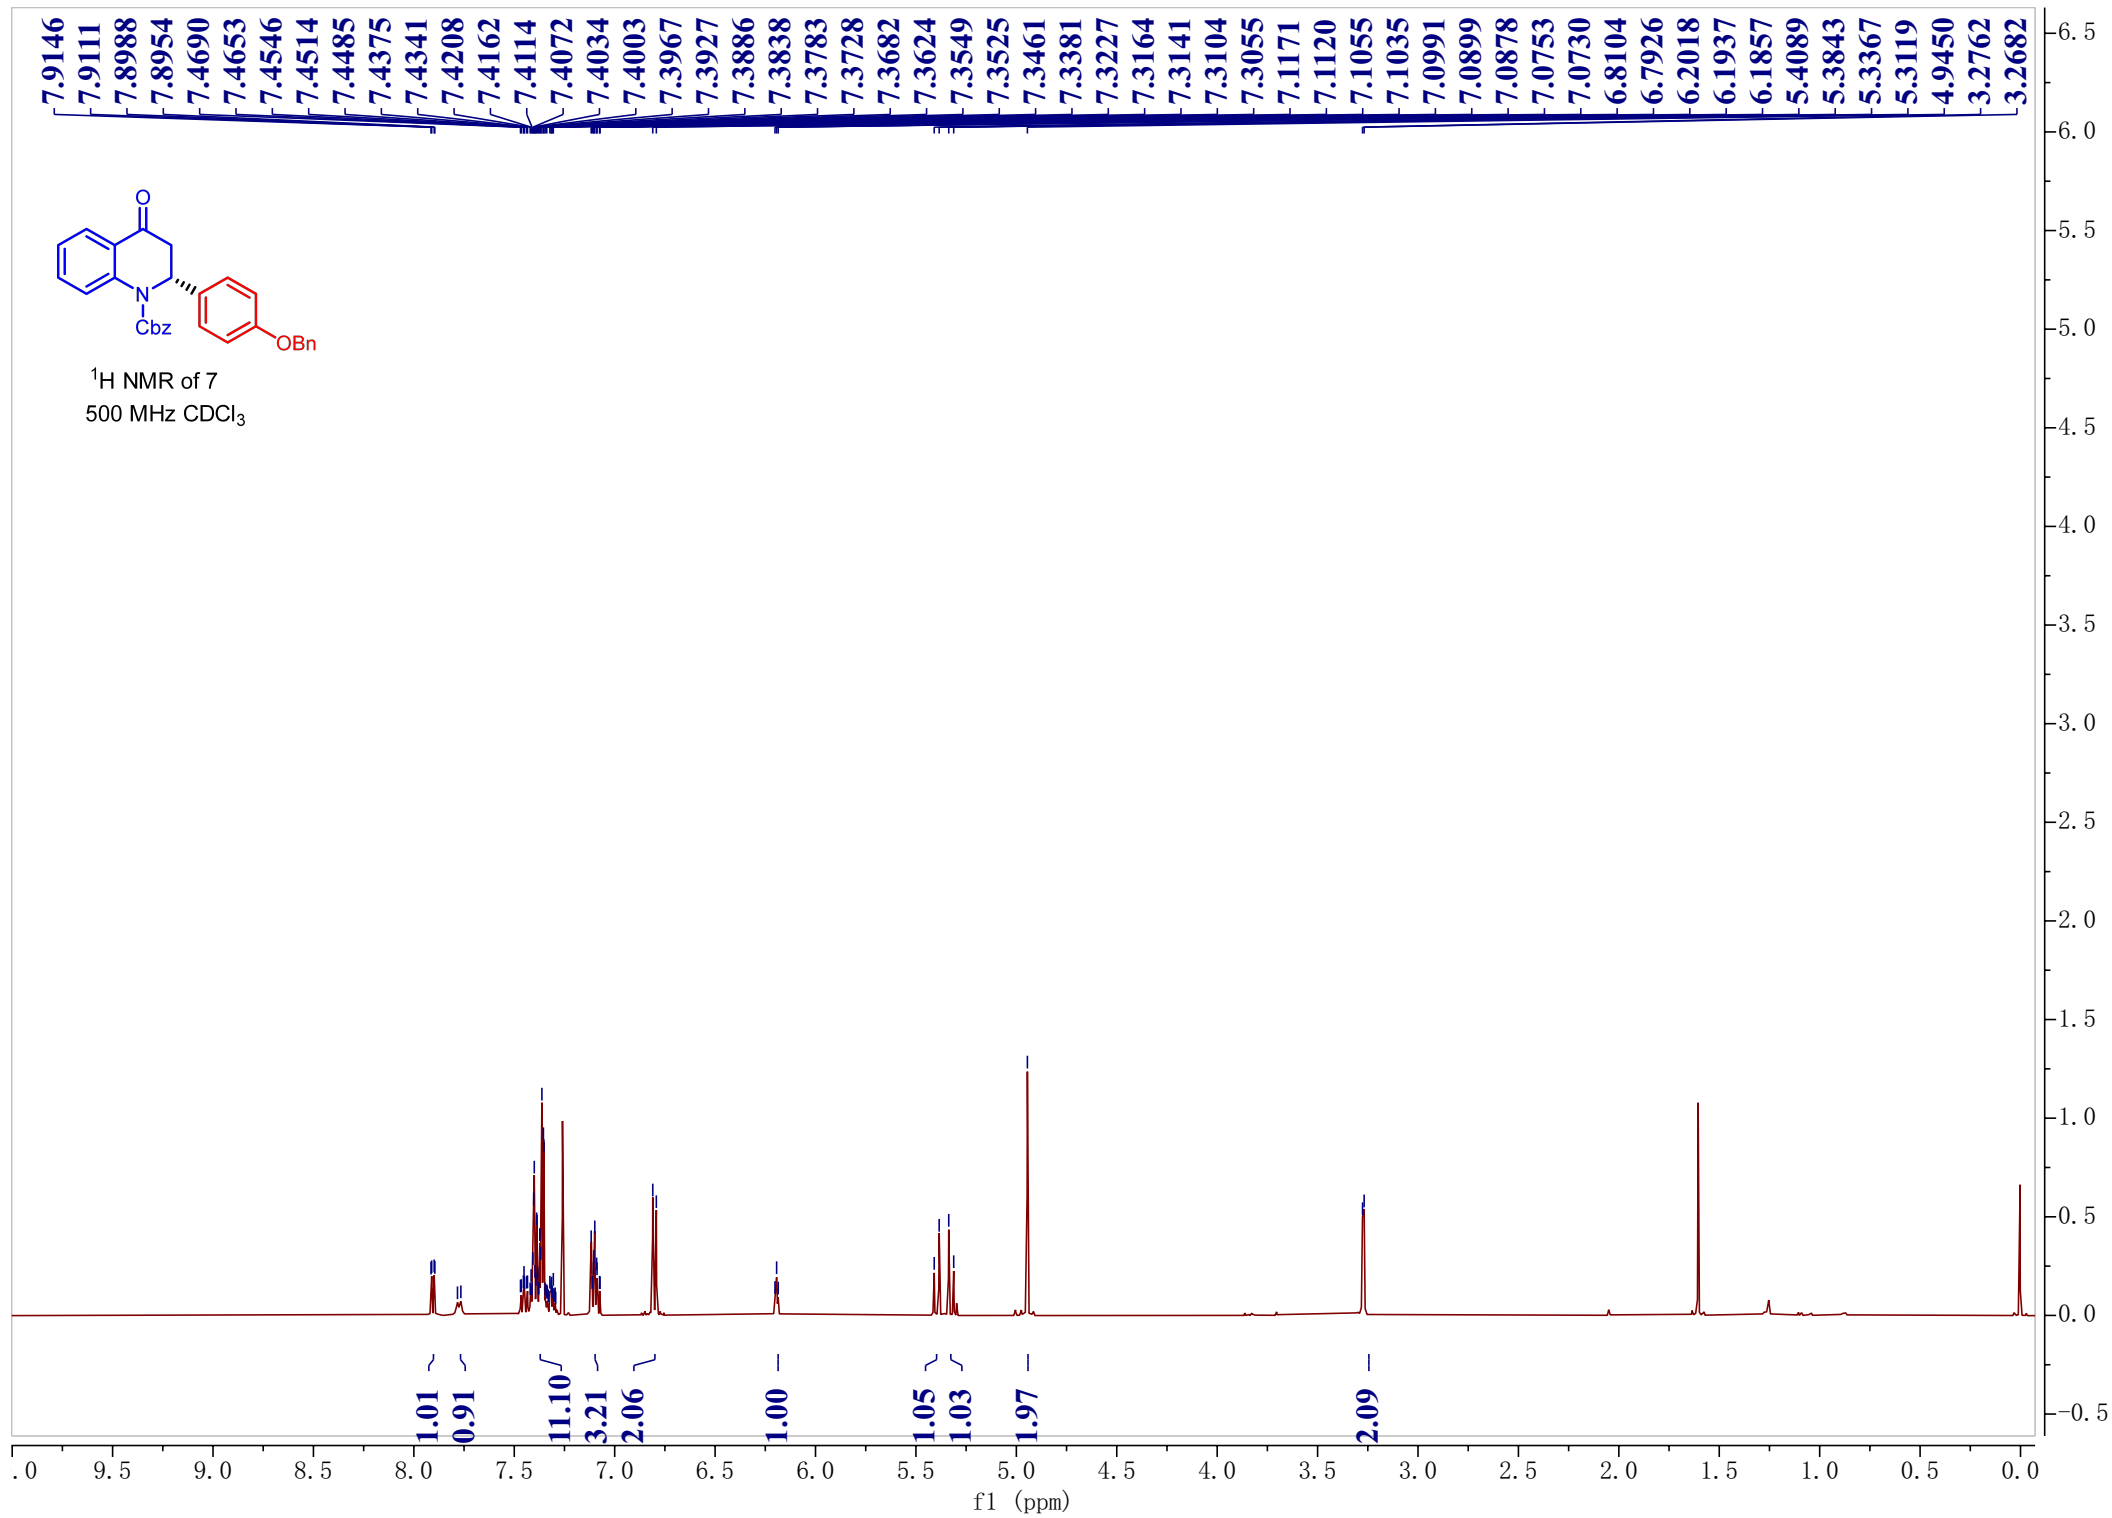

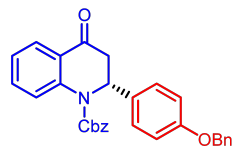

<sup>13</sup>C NMR of 7  
126 MHz CDCl<sub>3</sub>

193.1312  
158.2189  
154.4290  
141.4893  
136.7950  
135.7185  
134.6986  
130.4175  
128.8438  
128.7219  
128.6299  
128.3198  
128.1671  
127.9999  
127.6193  
126.9747  
125.1626  
124.5909  
124.3251  
114.9504

70.0271  
68.6159

55.8033

42.5369

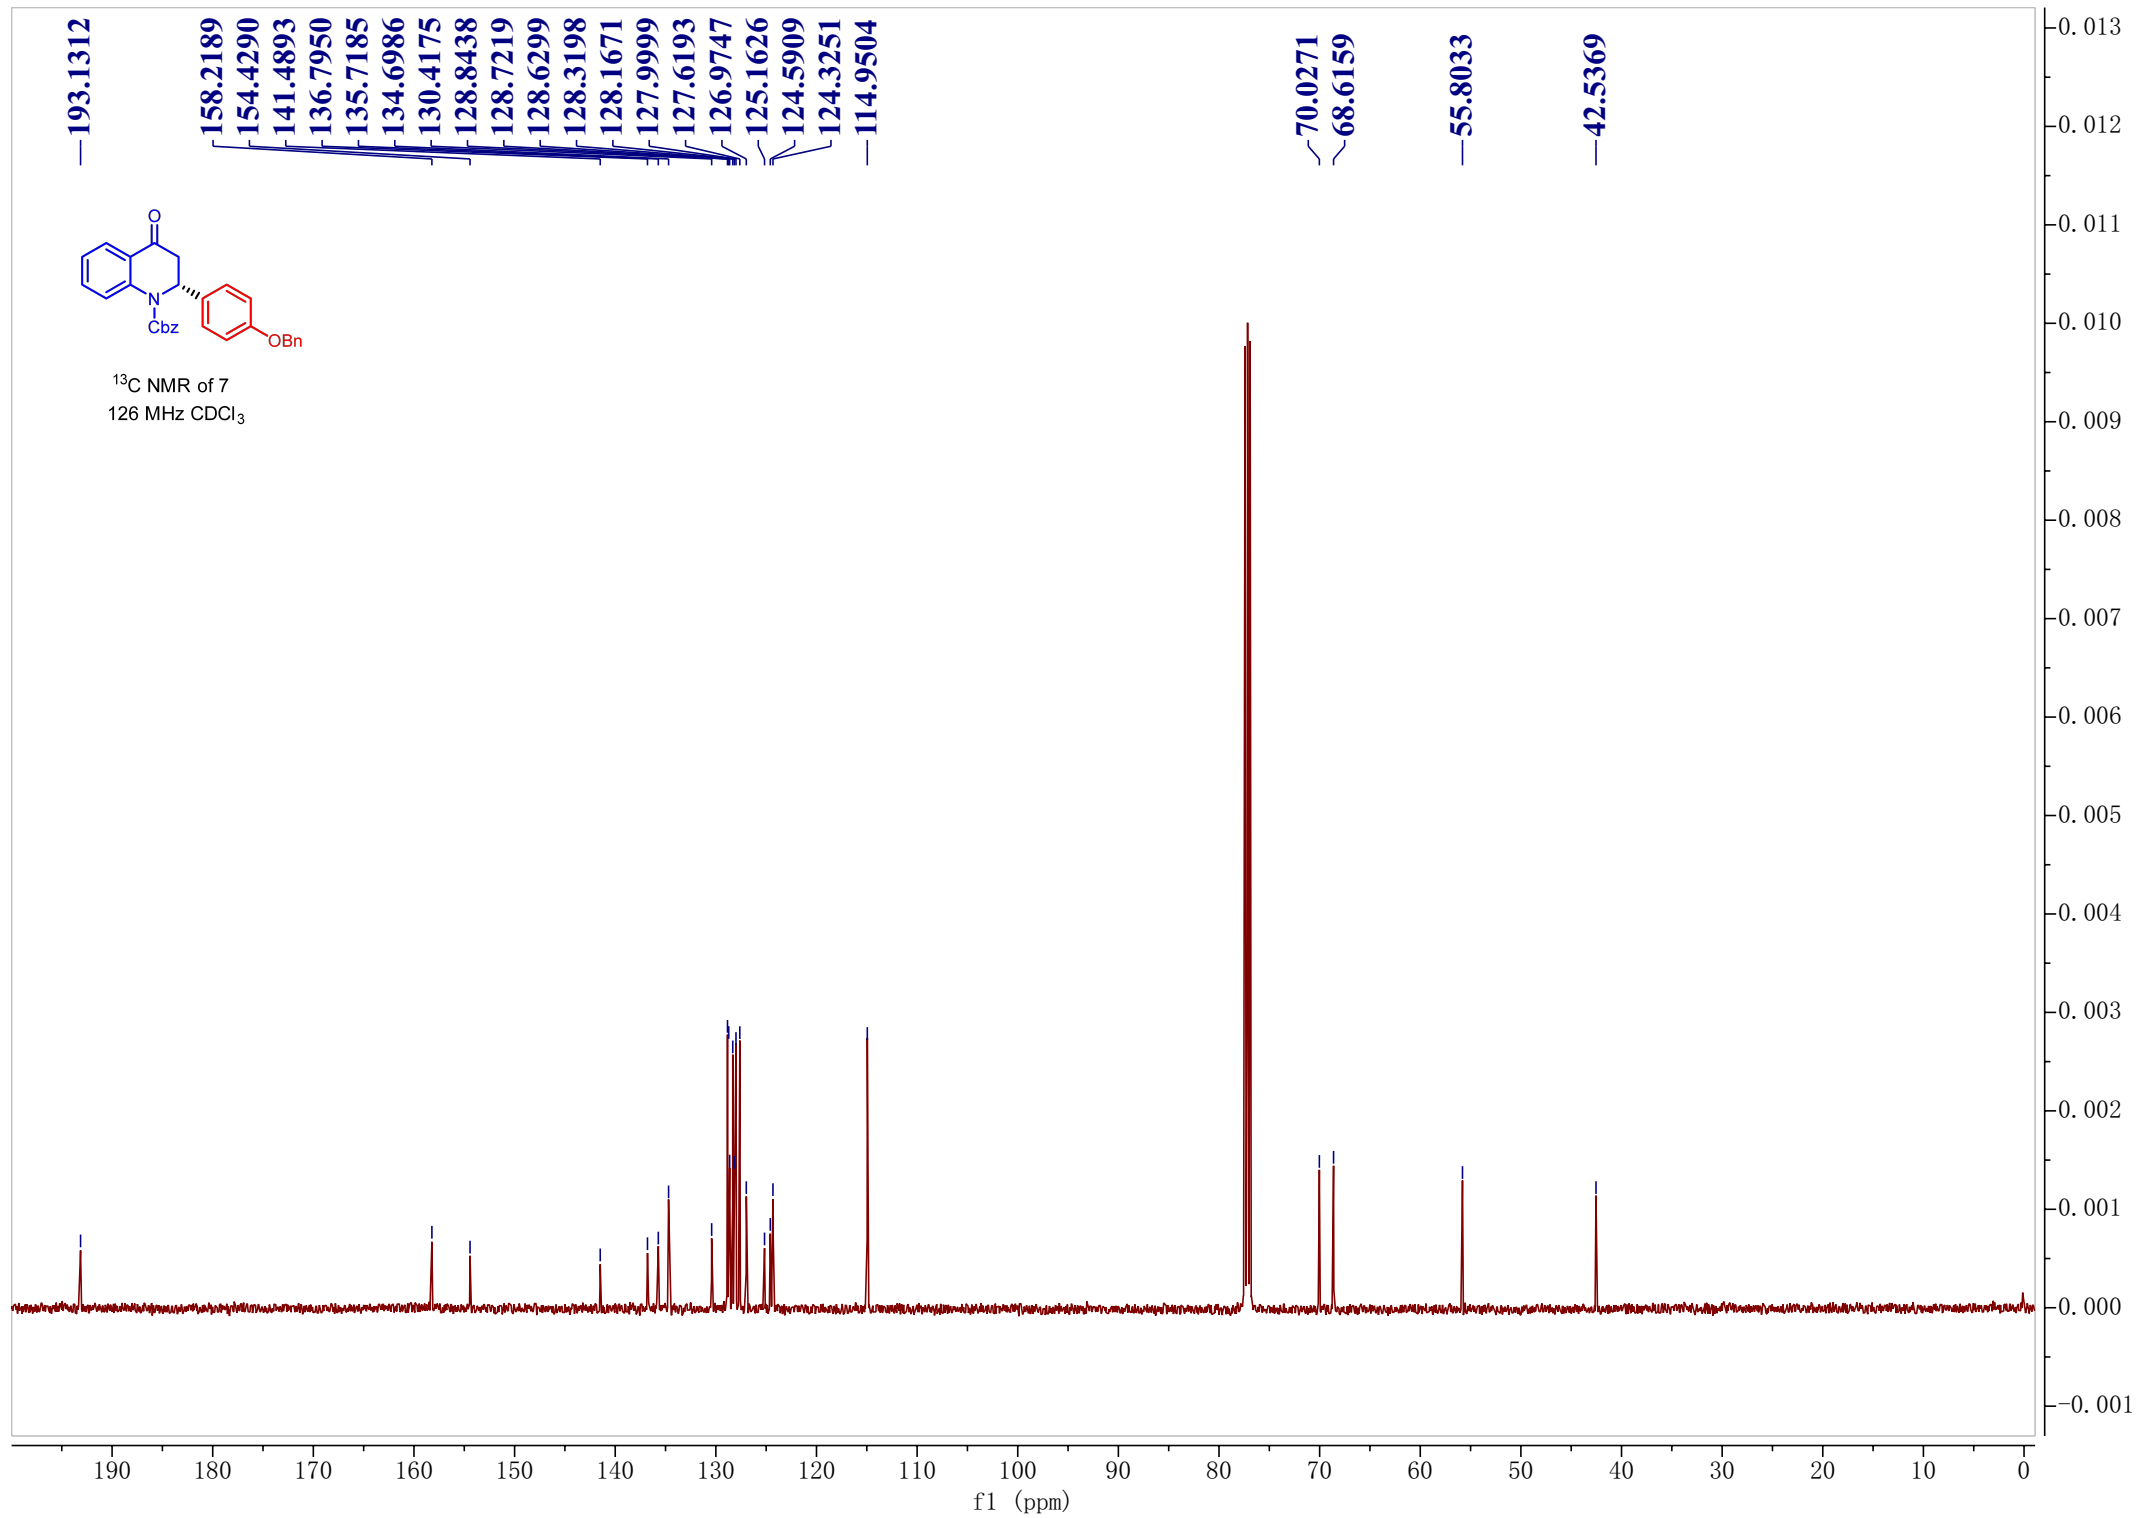

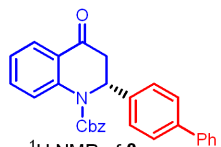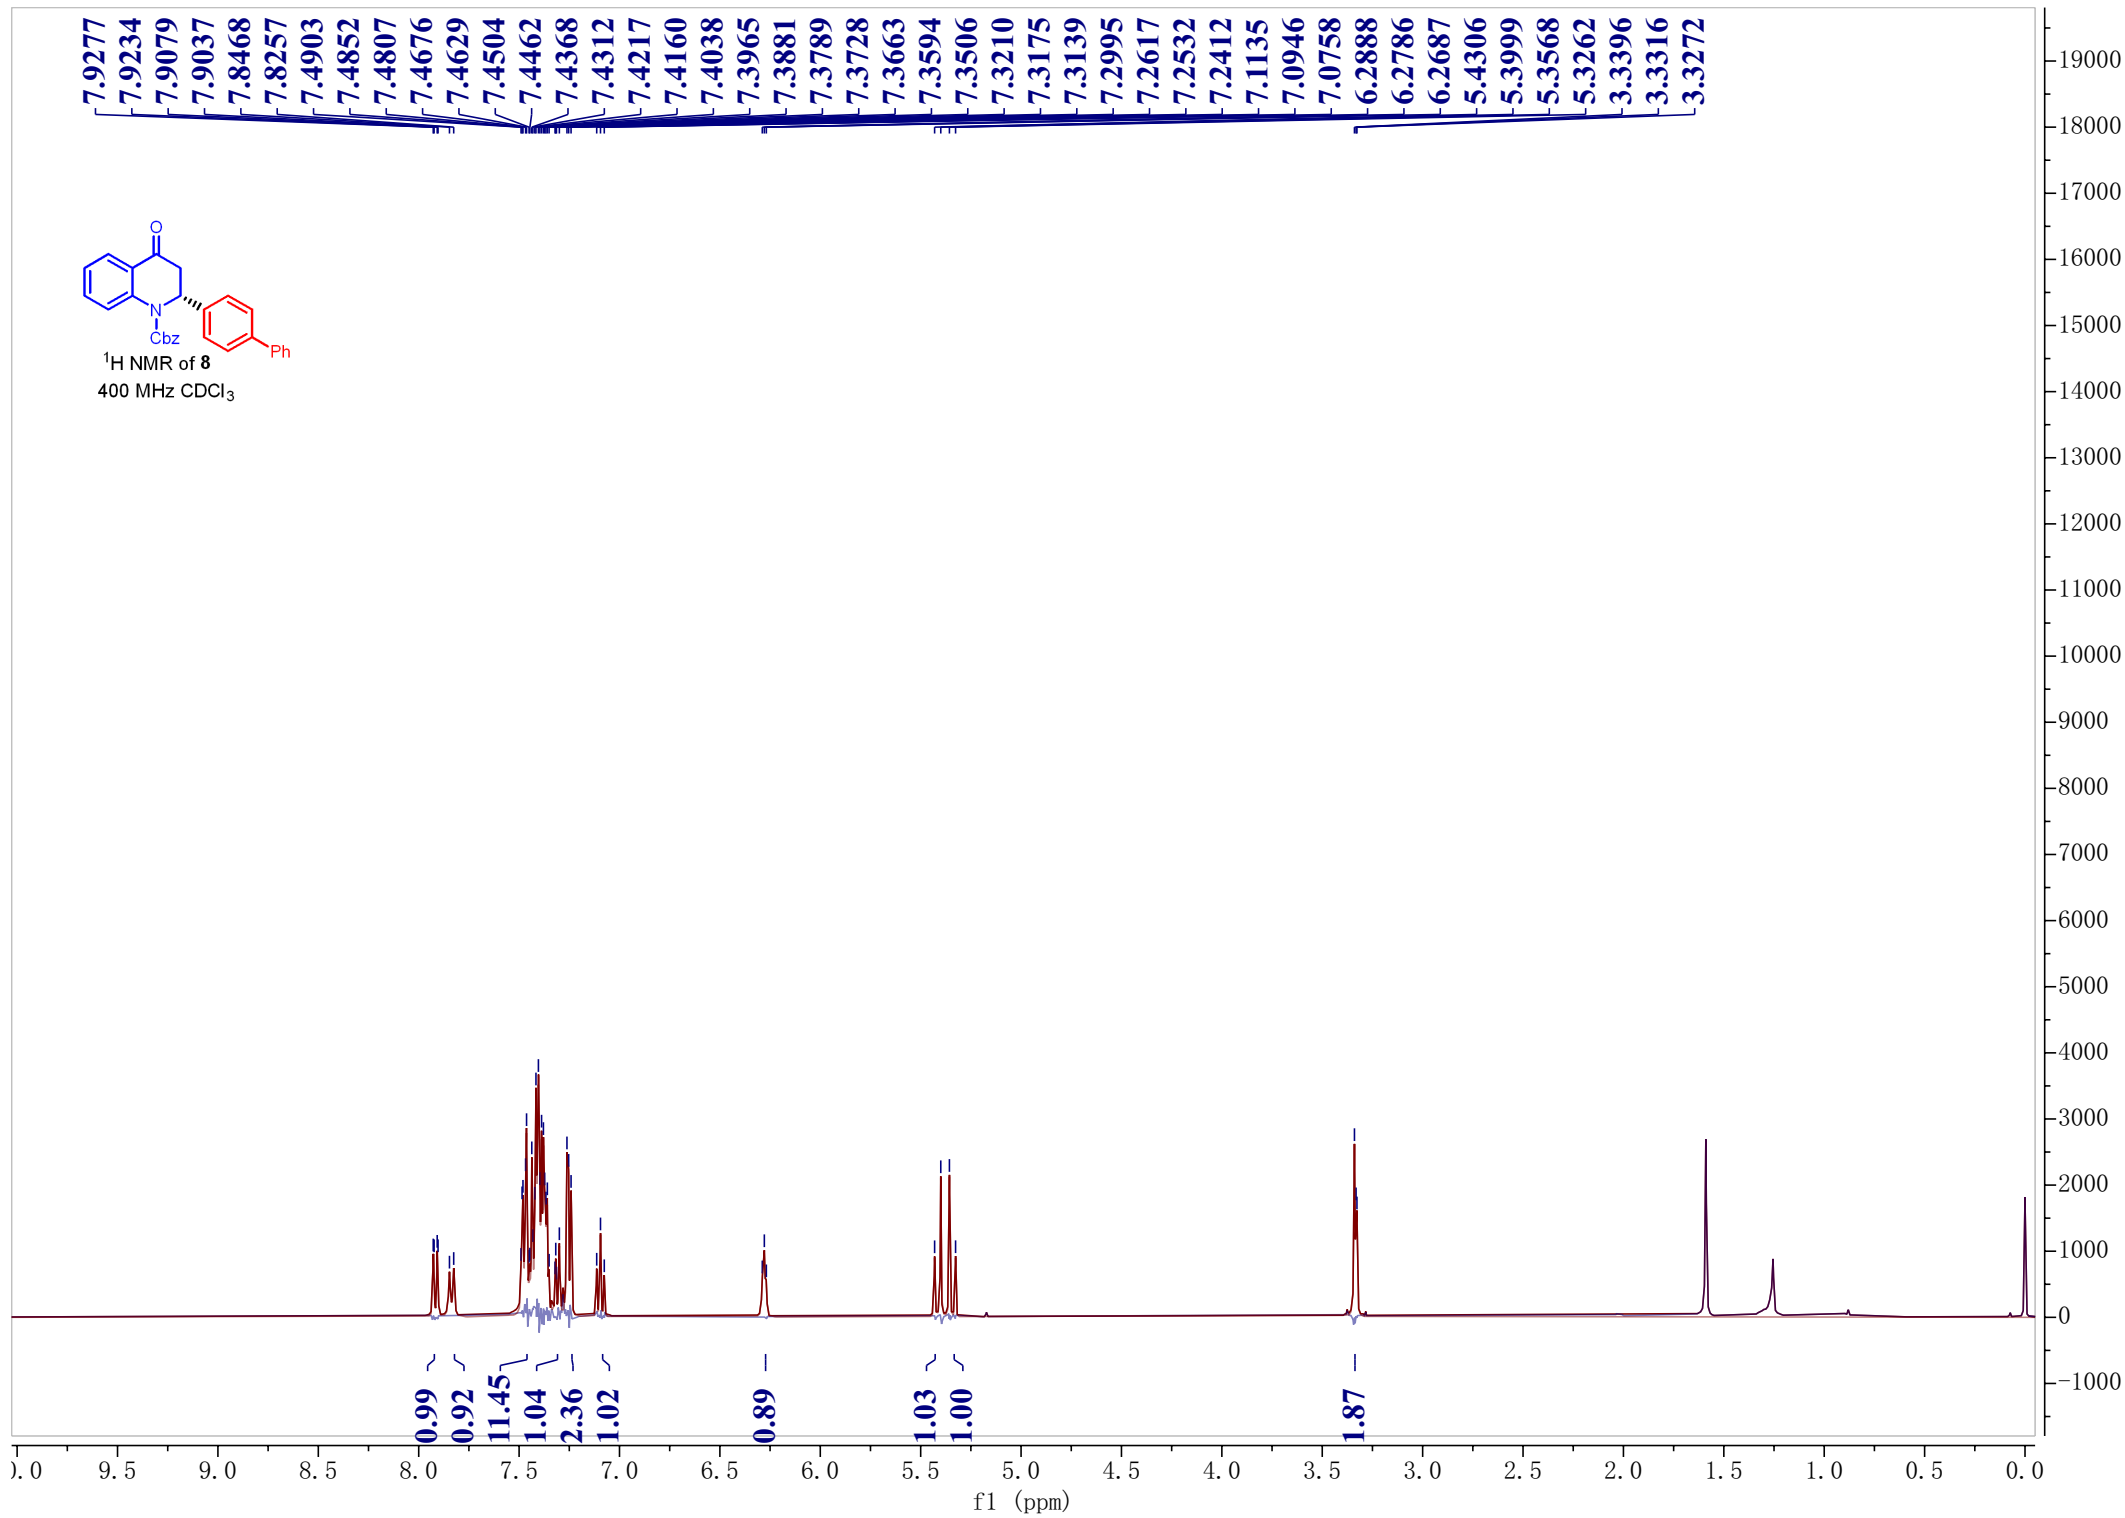

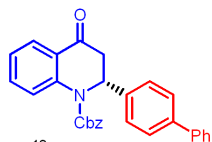

<sup>13</sup>C NMR of **8**  
101 MHz CDCl<sub>3</sub>

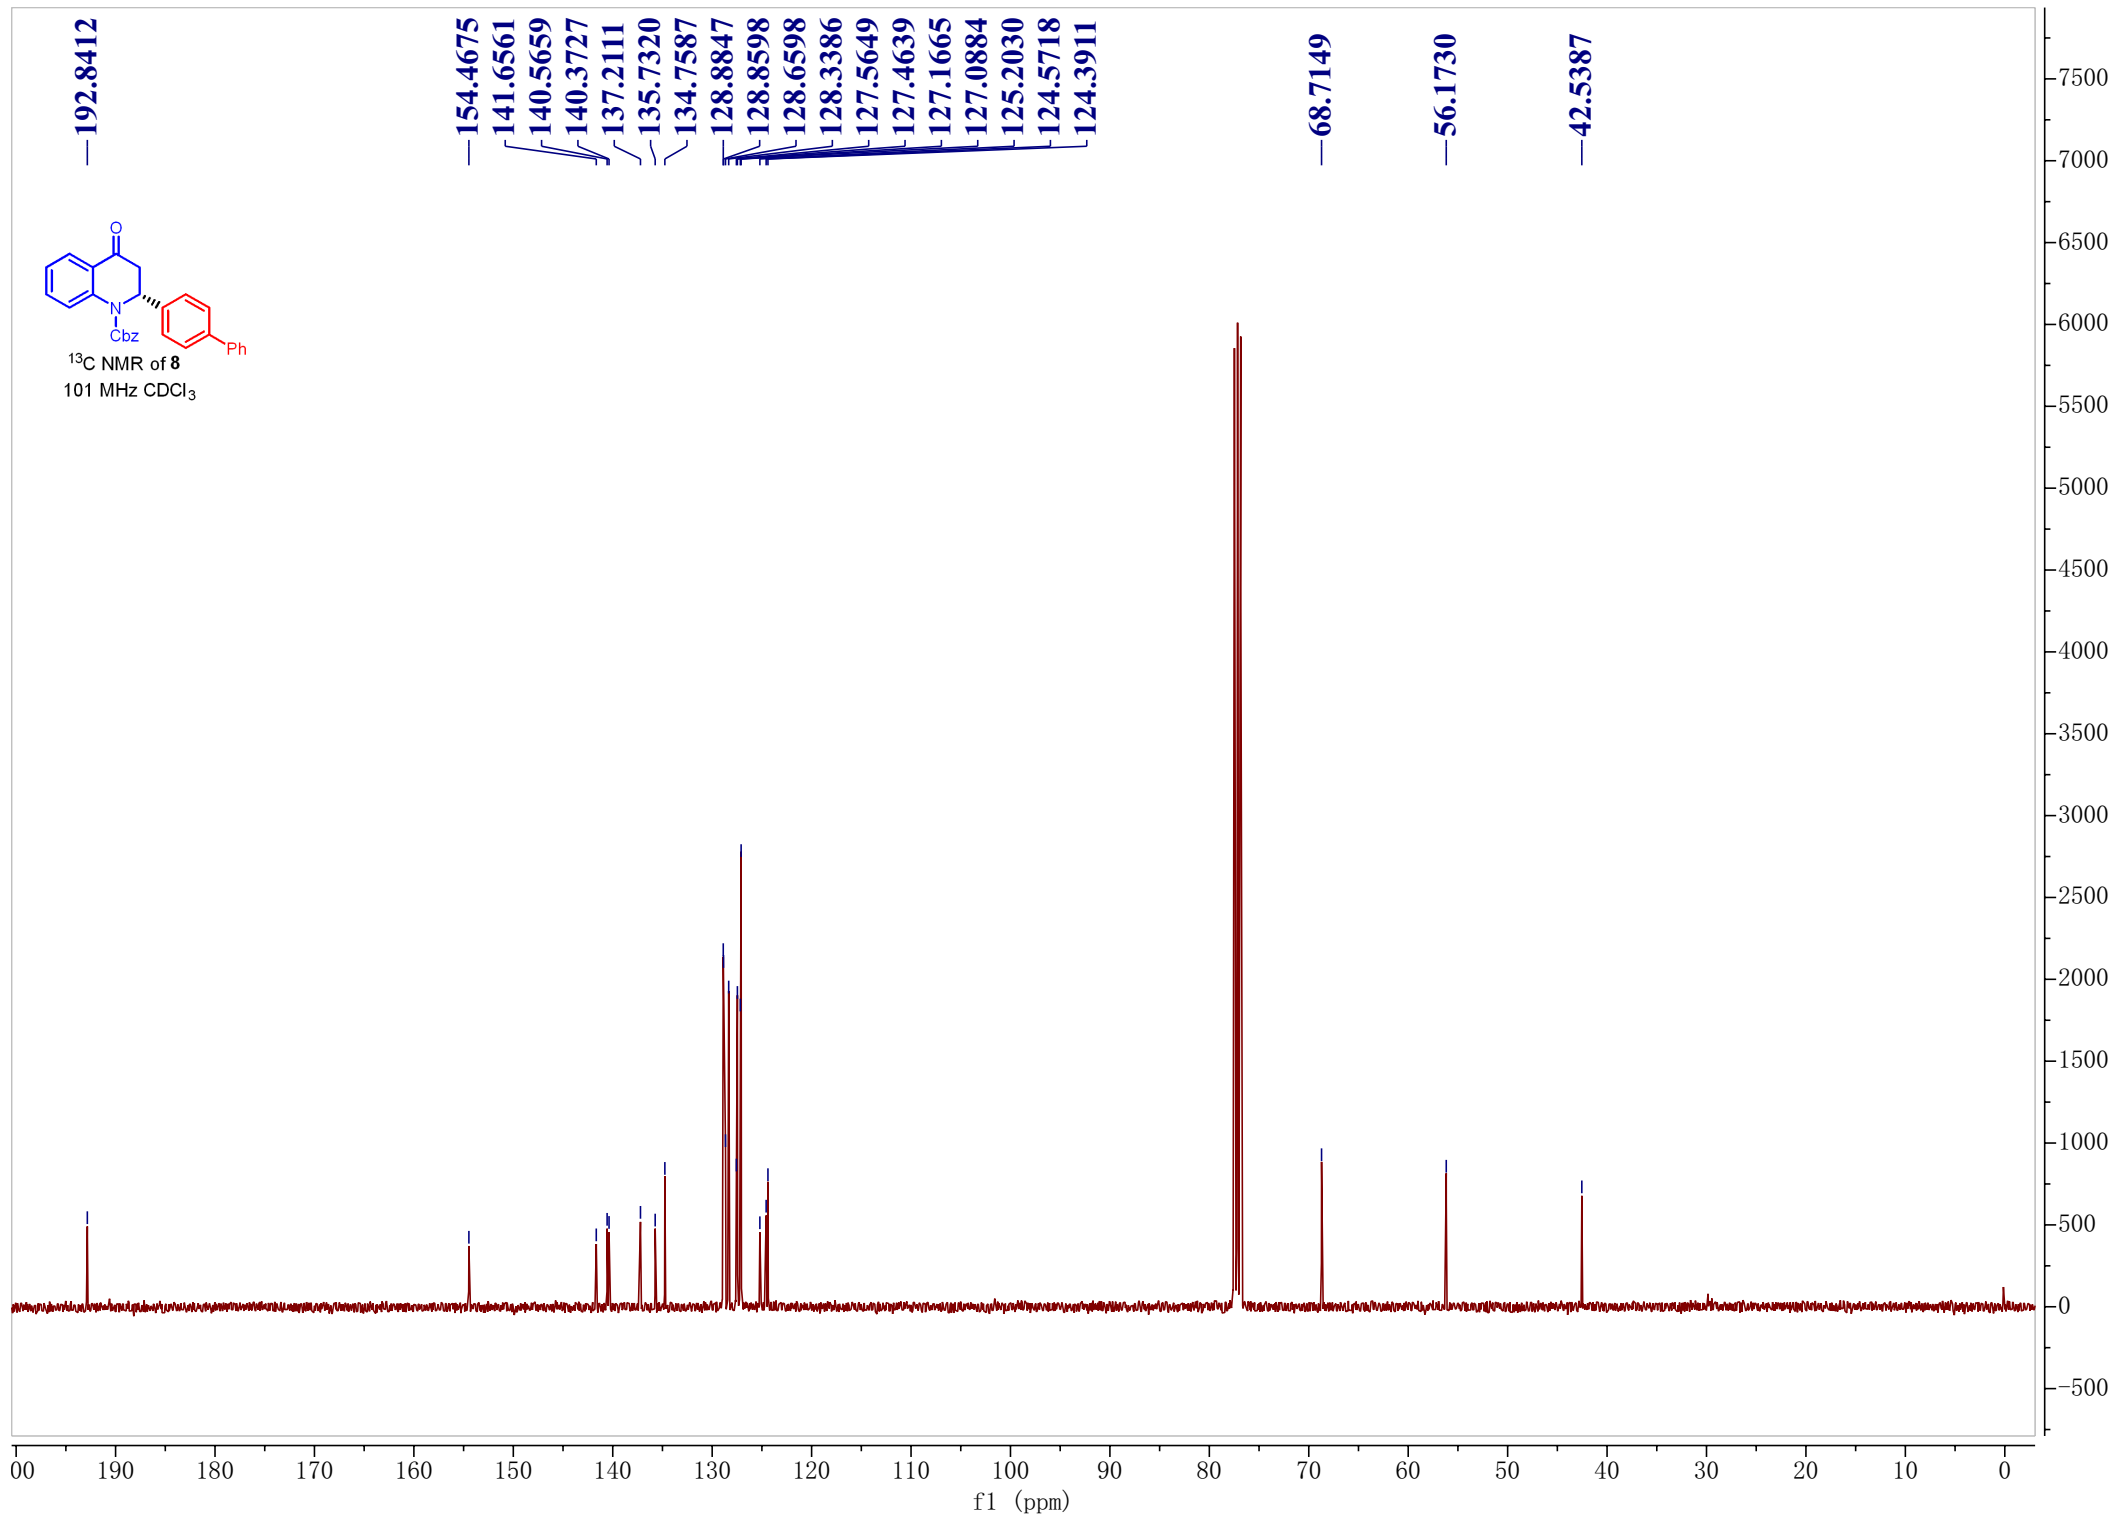

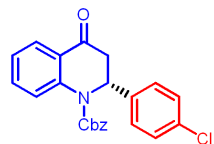

<sup>1</sup>H NMR of **9**  
400 MHz CDCl<sub>3</sub>

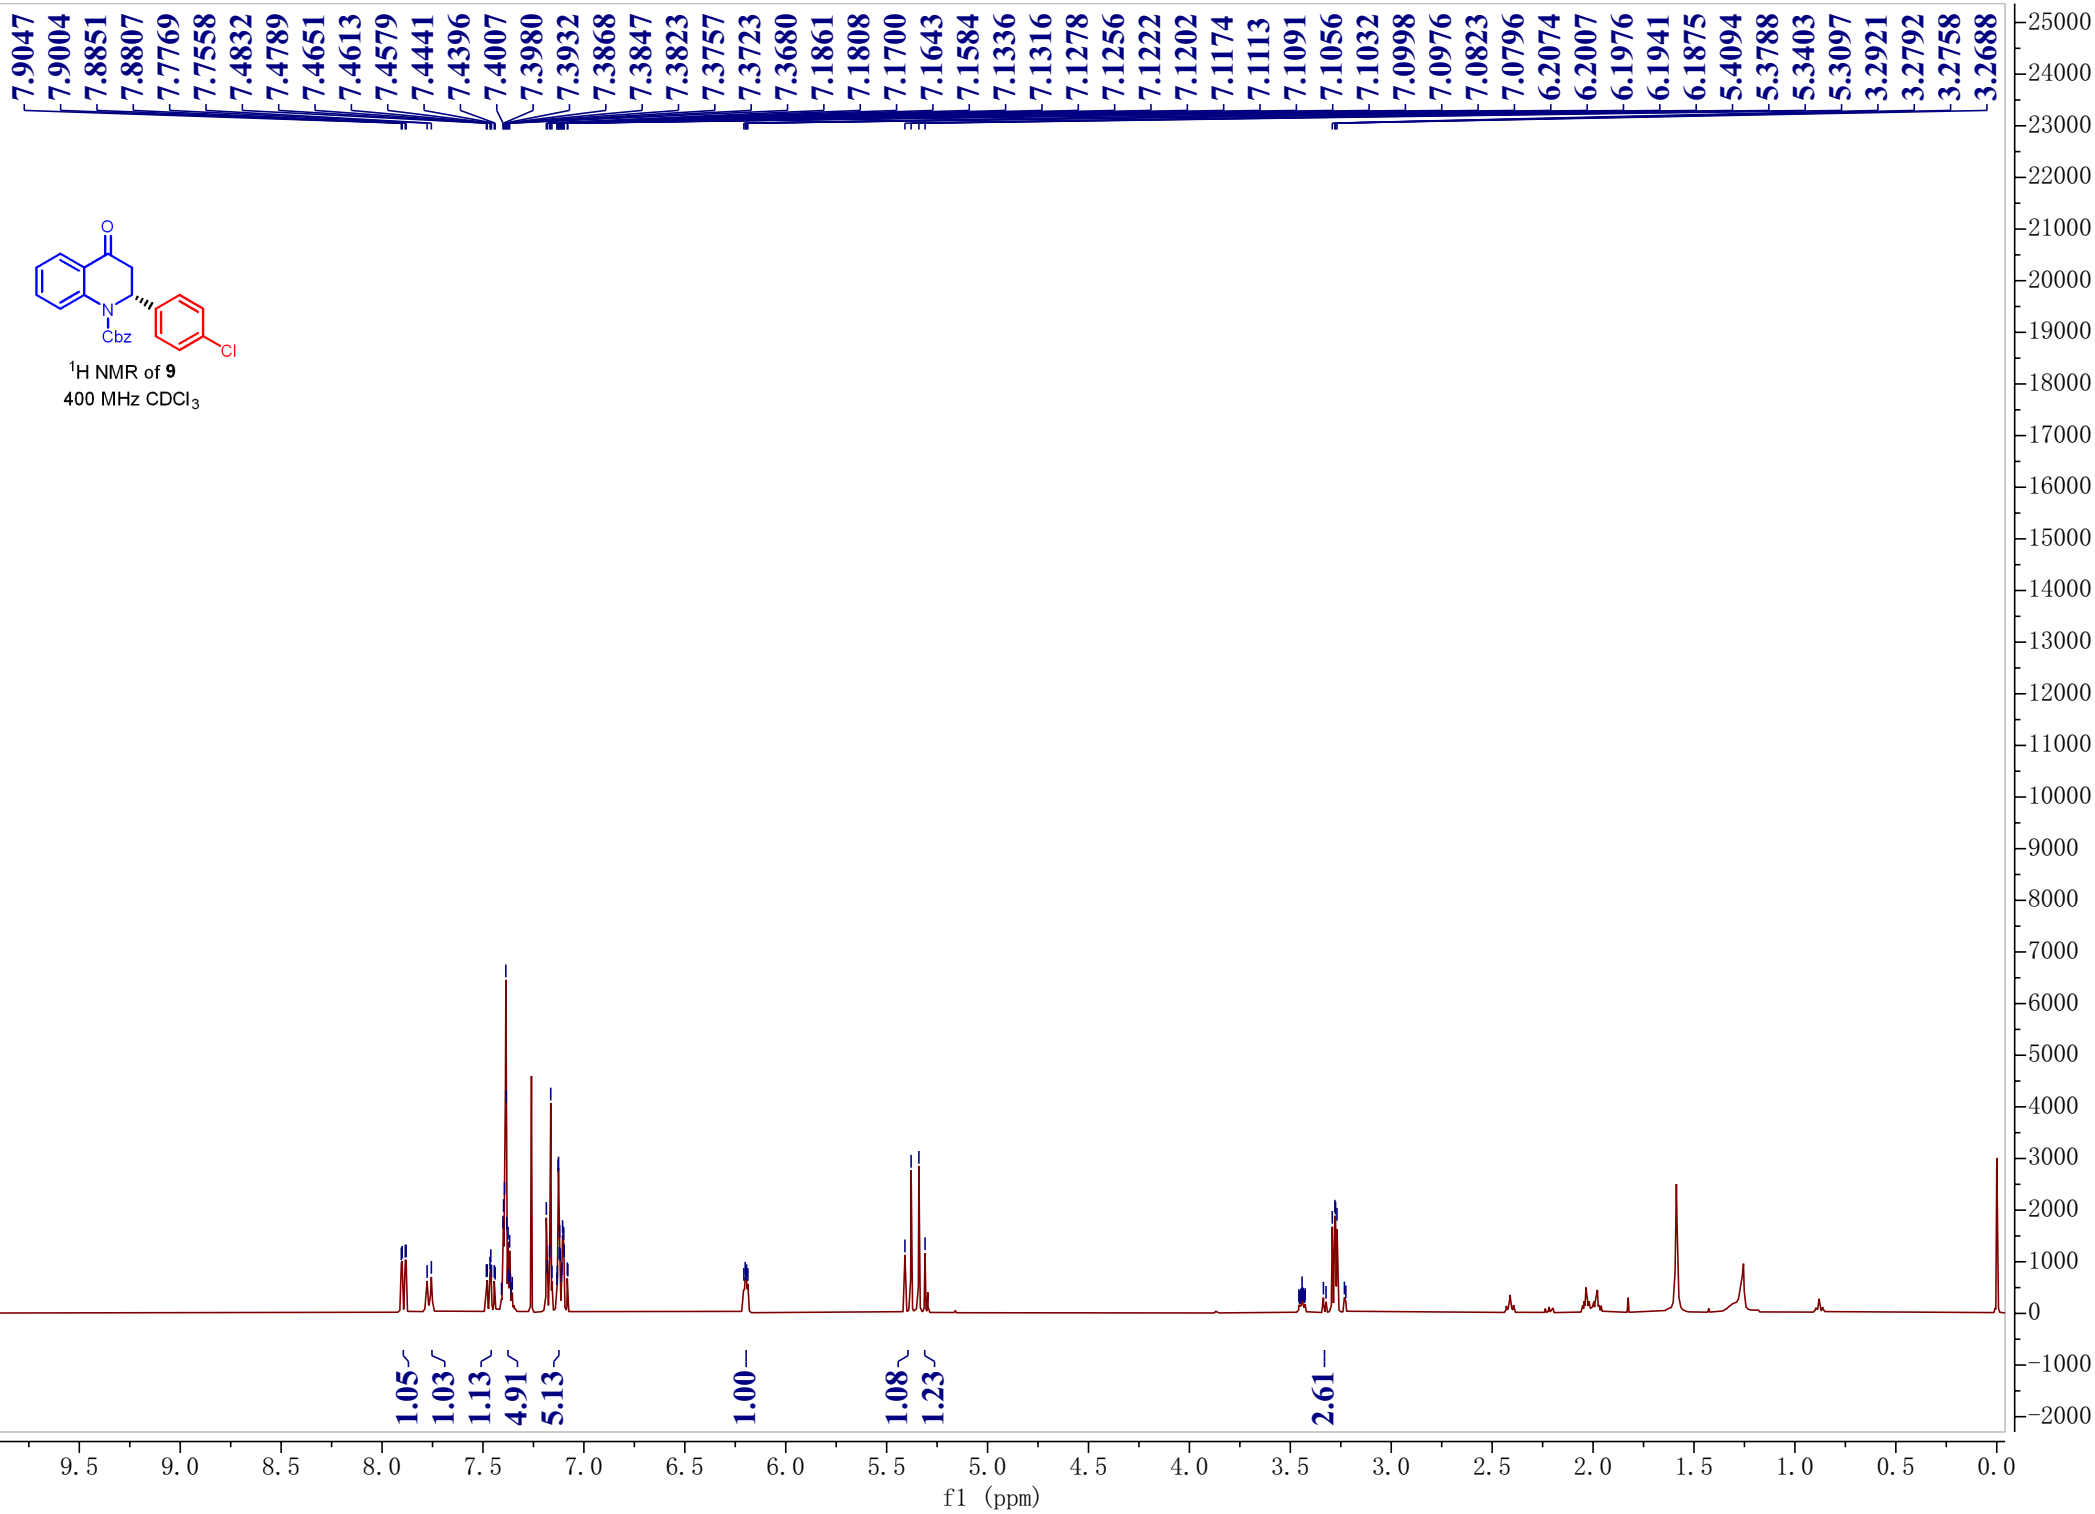

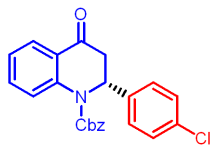

<sup>13</sup>C NMR of **9**  
101 MHz CDCl<sub>3</sub>

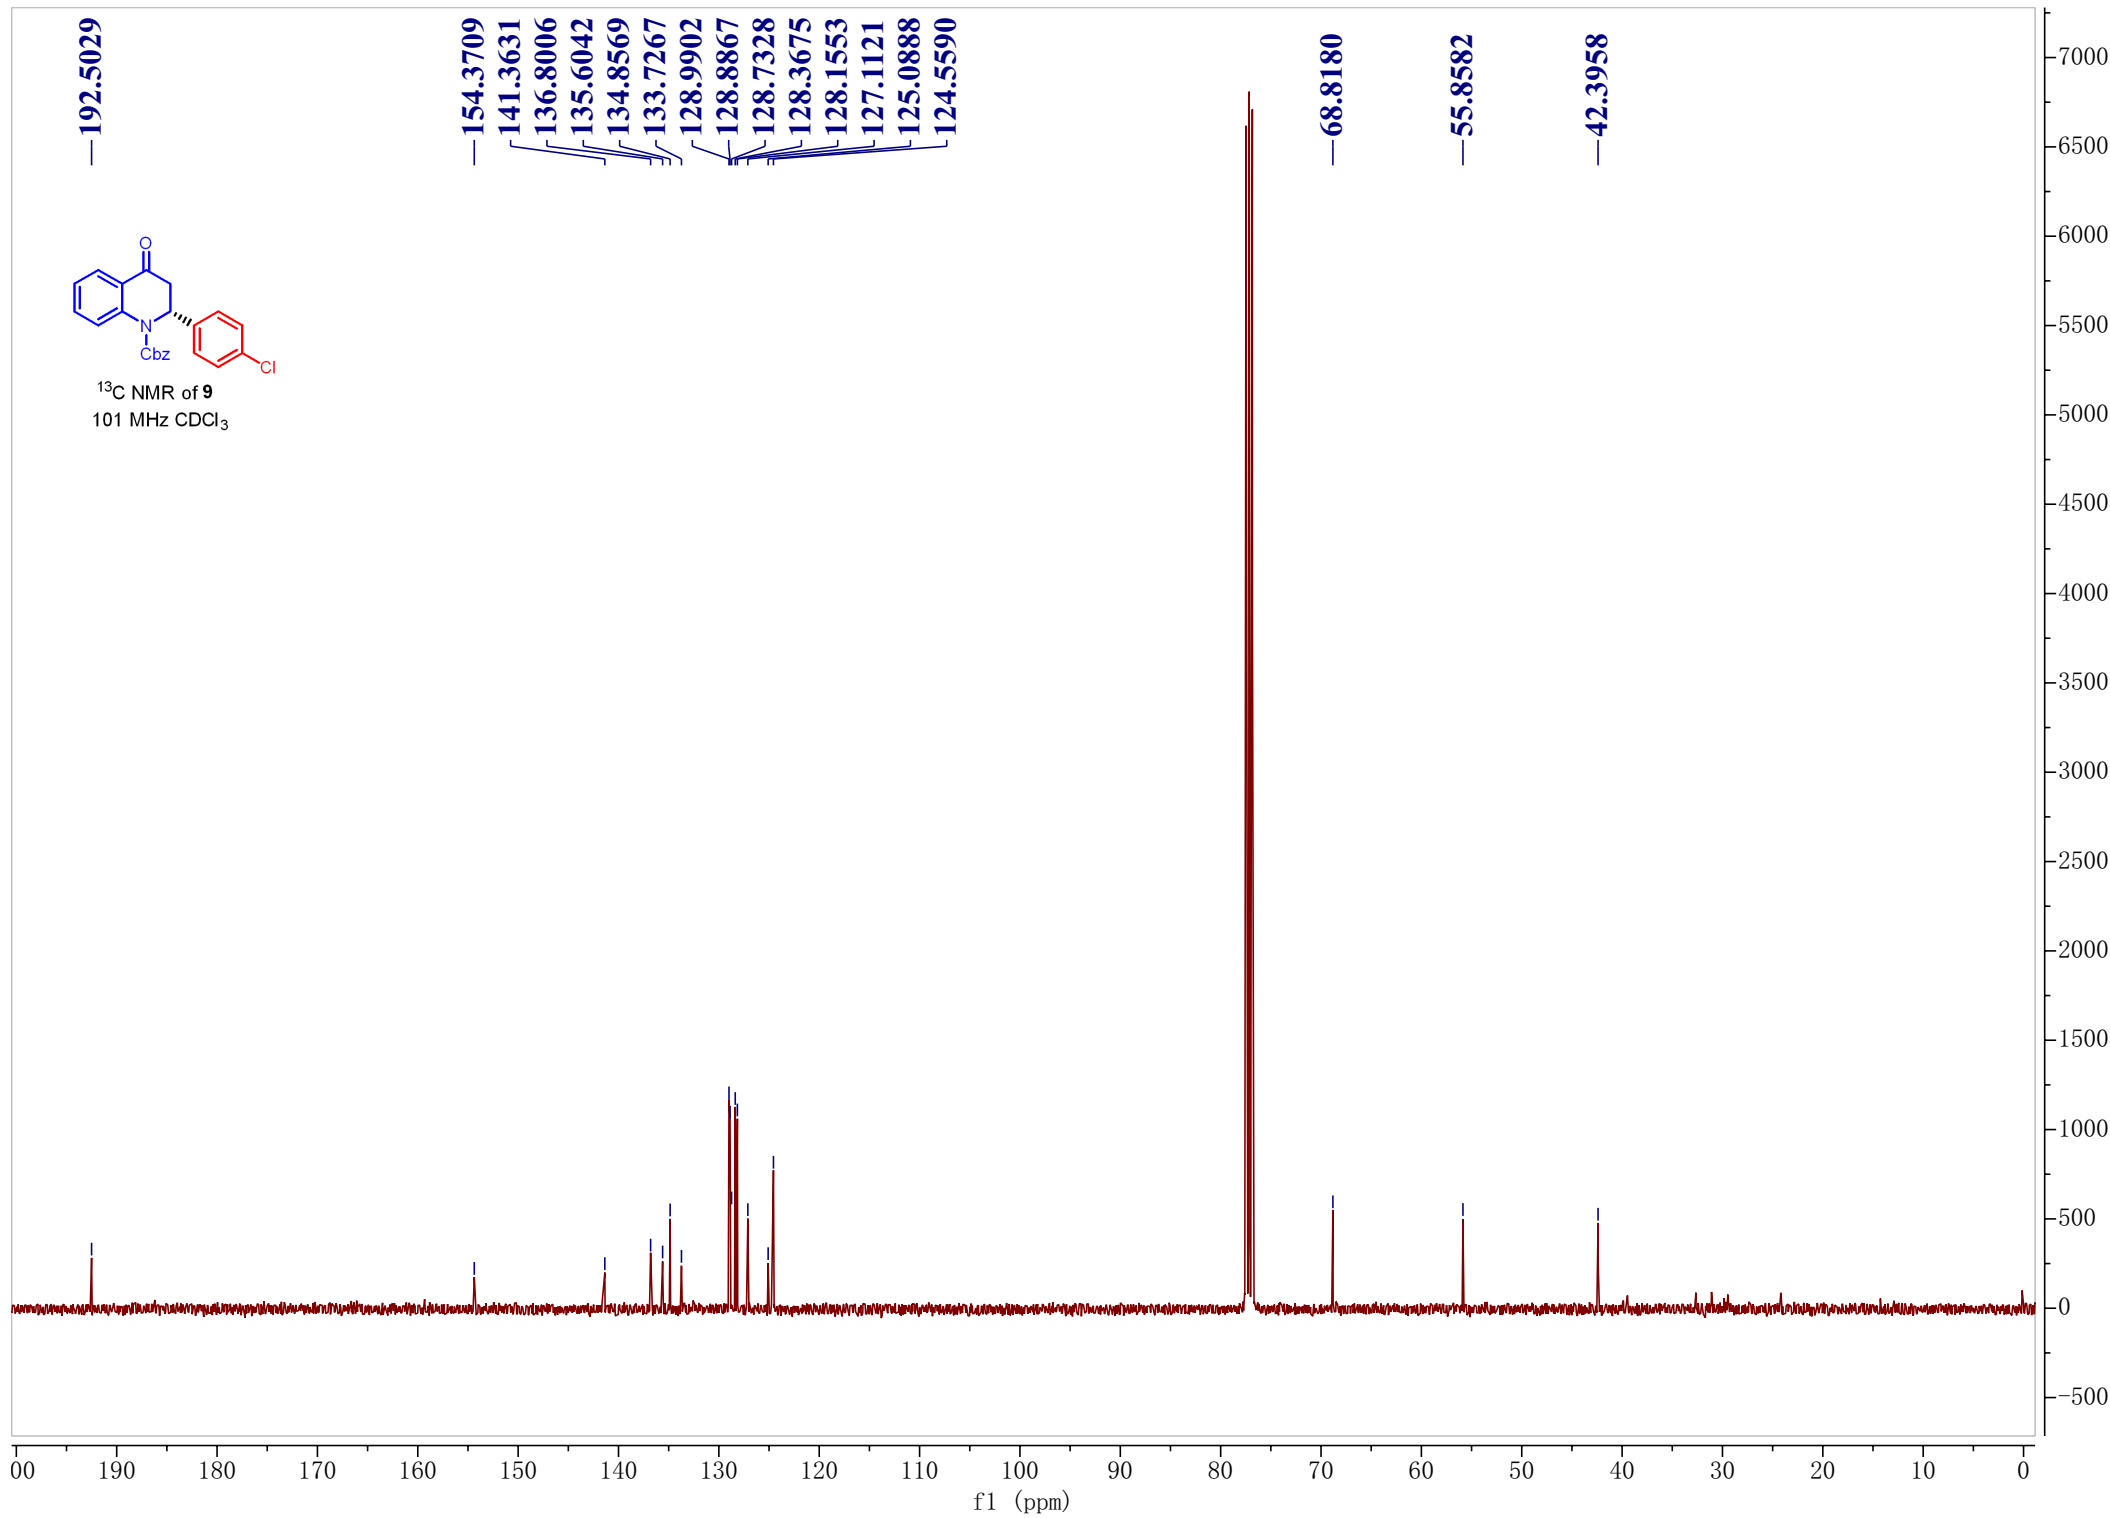



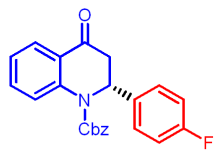

<sup>1</sup>H NMR of **10**  
400 MHz CDCl<sub>3</sub>

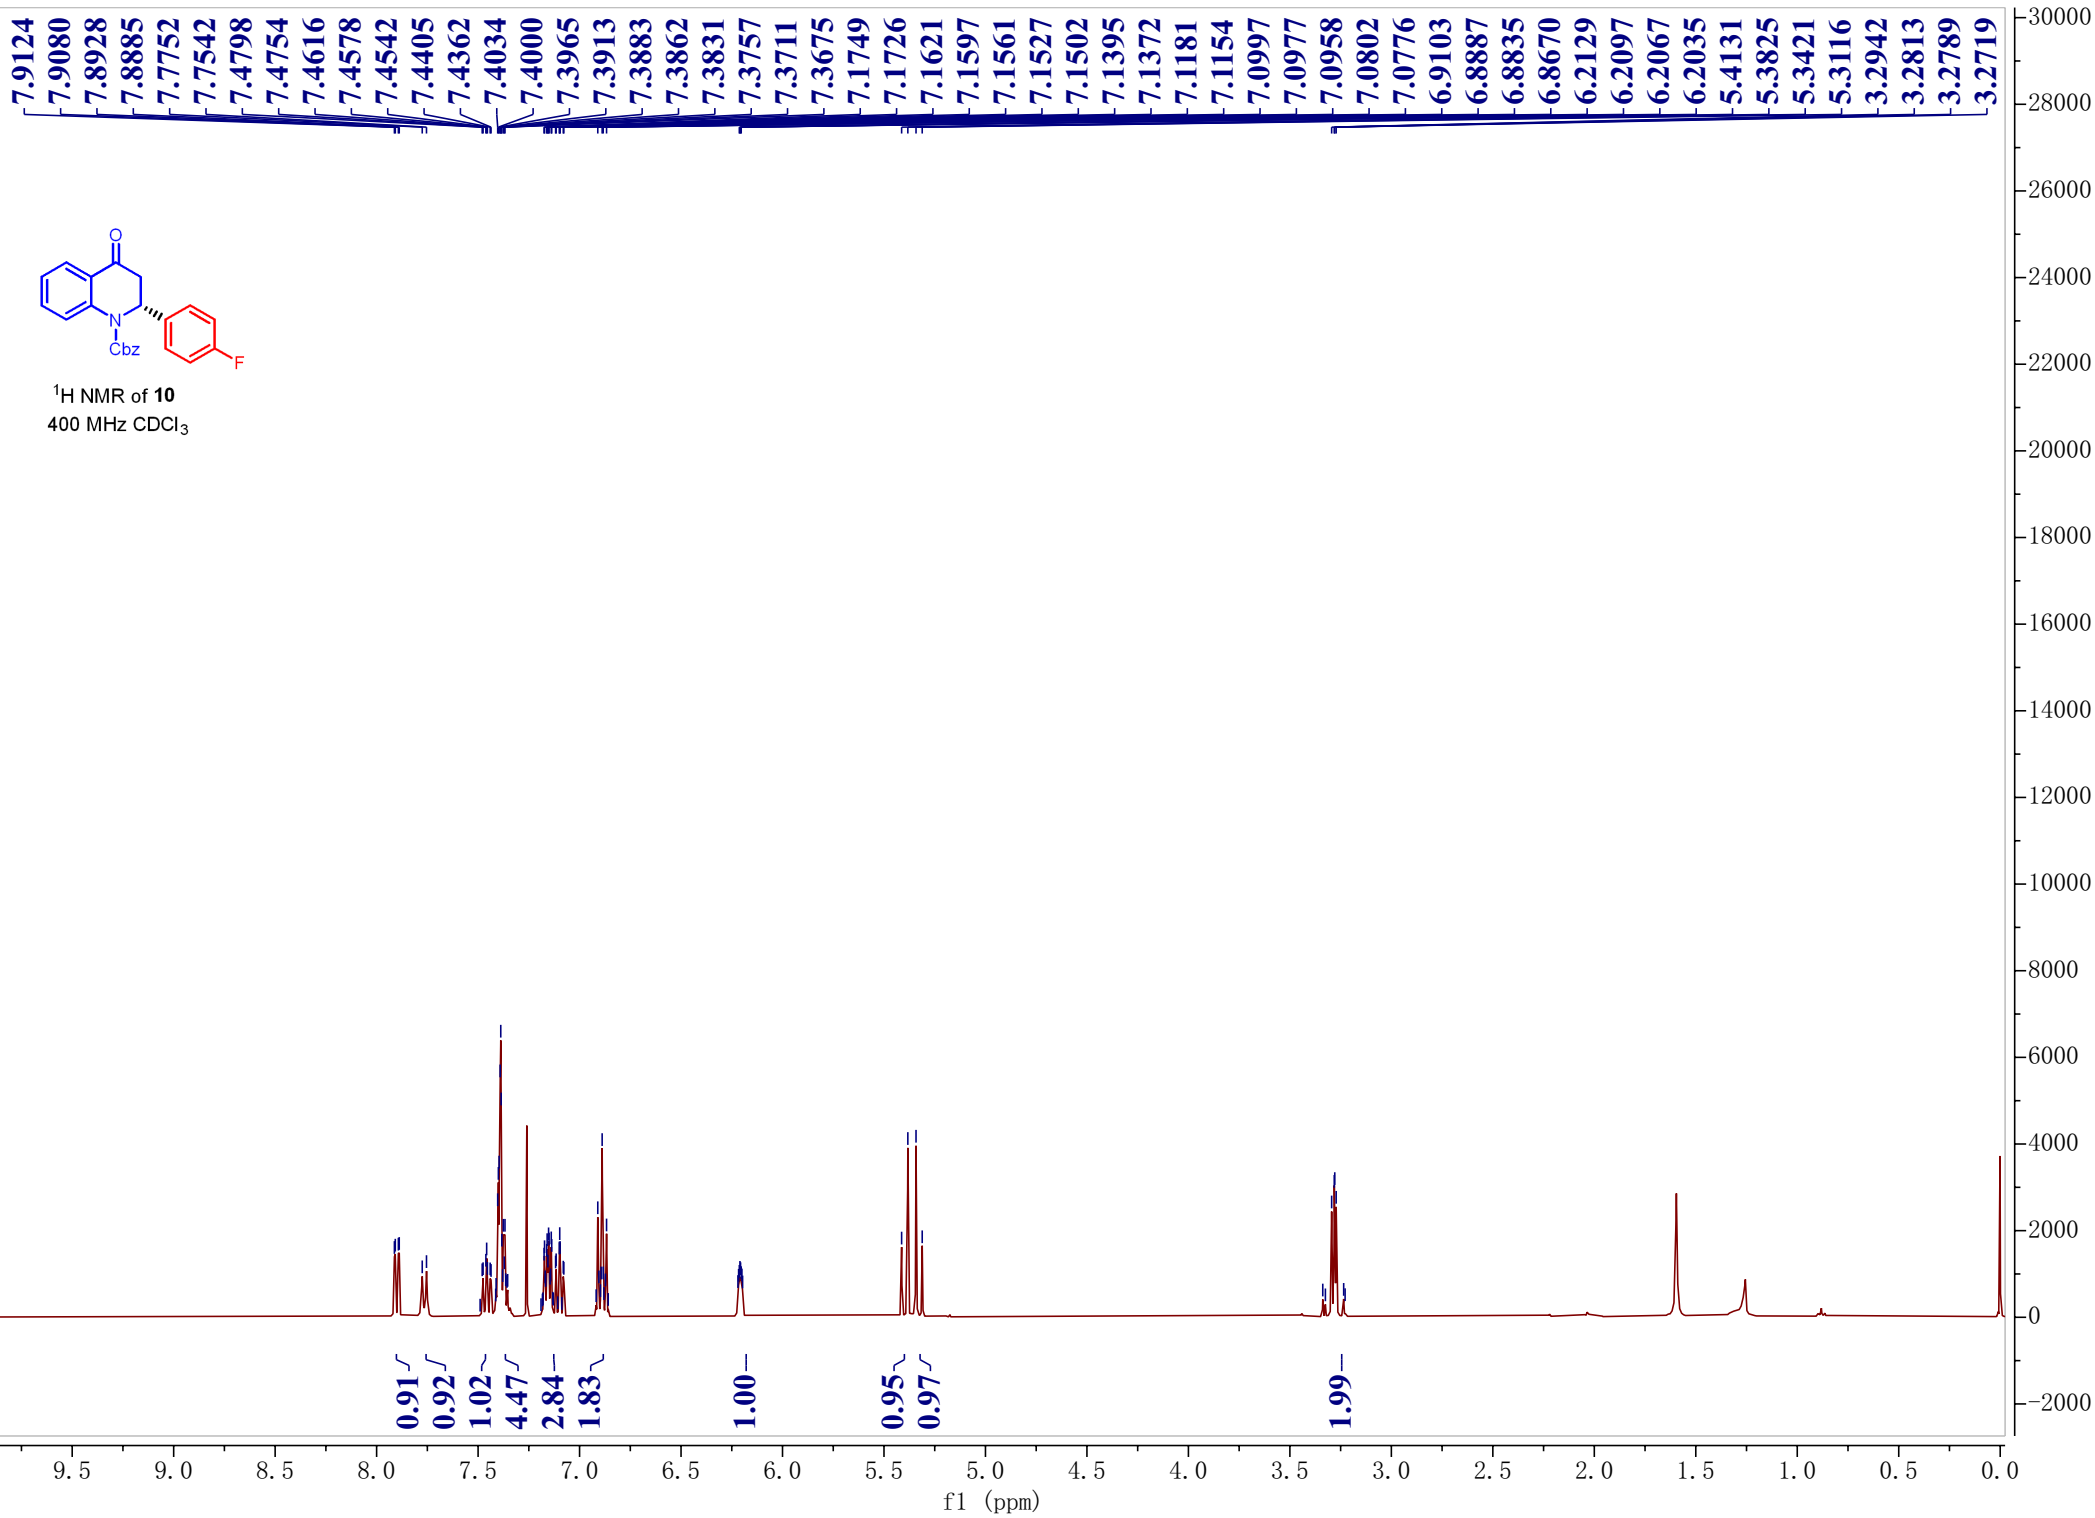

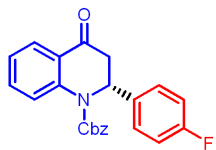

<sup>13</sup>C NMR of **10**  
101 MHz CDCl<sub>3</sub>

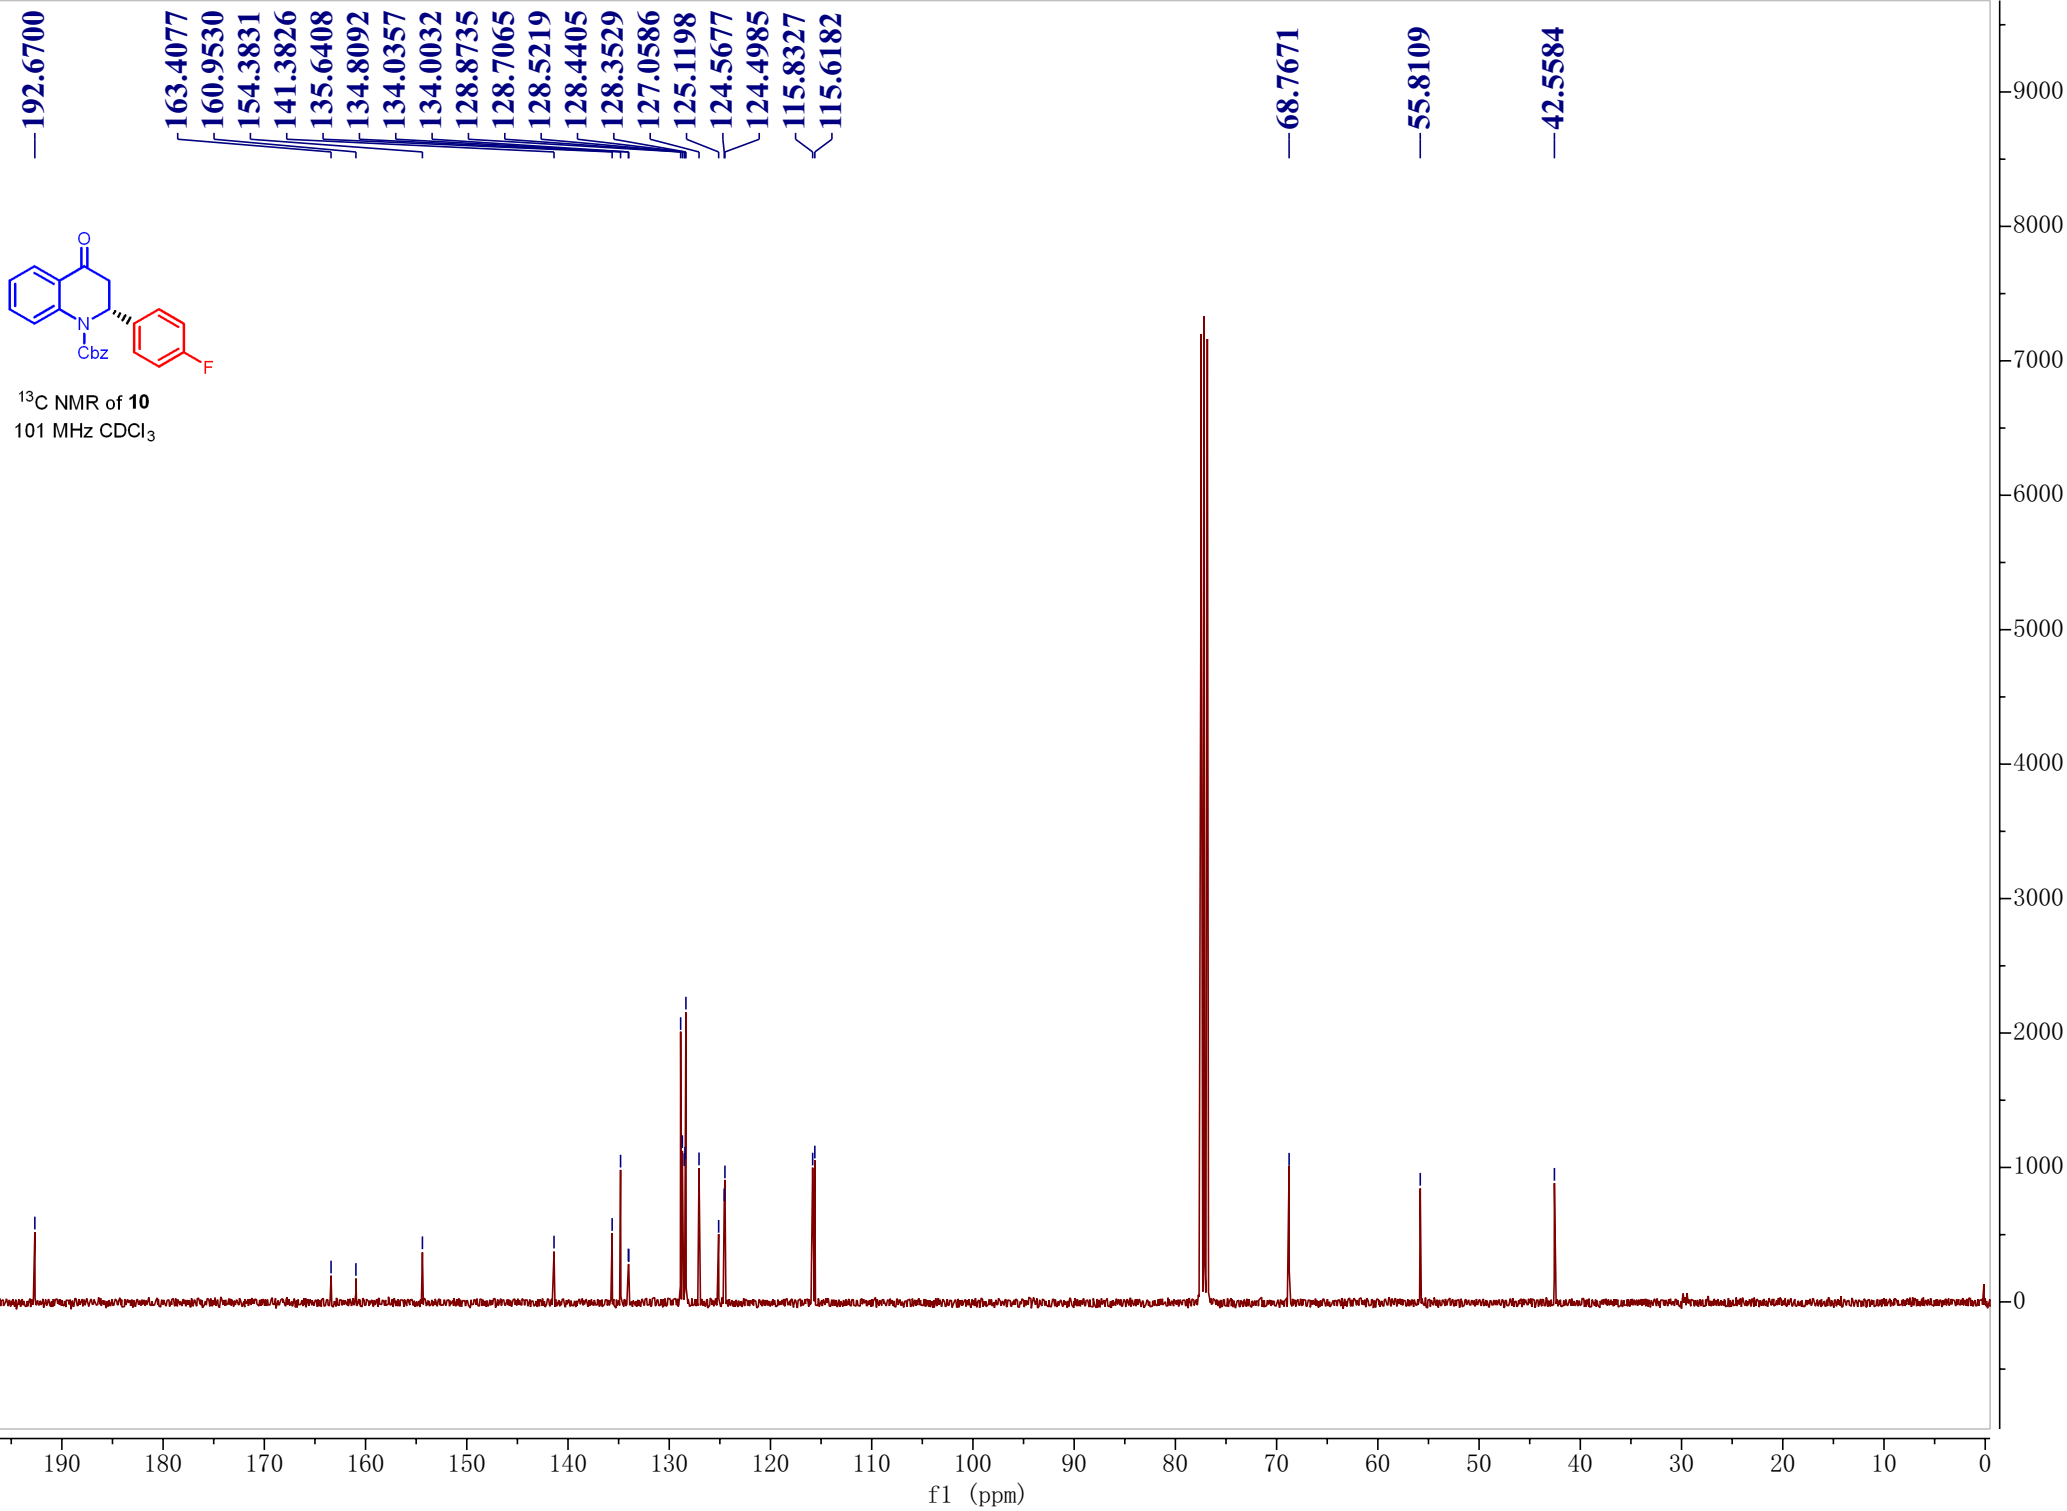

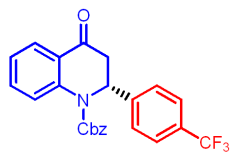

<sup>1</sup>H NMR of **11**  
400 MHz CDCl<sub>3</sub>

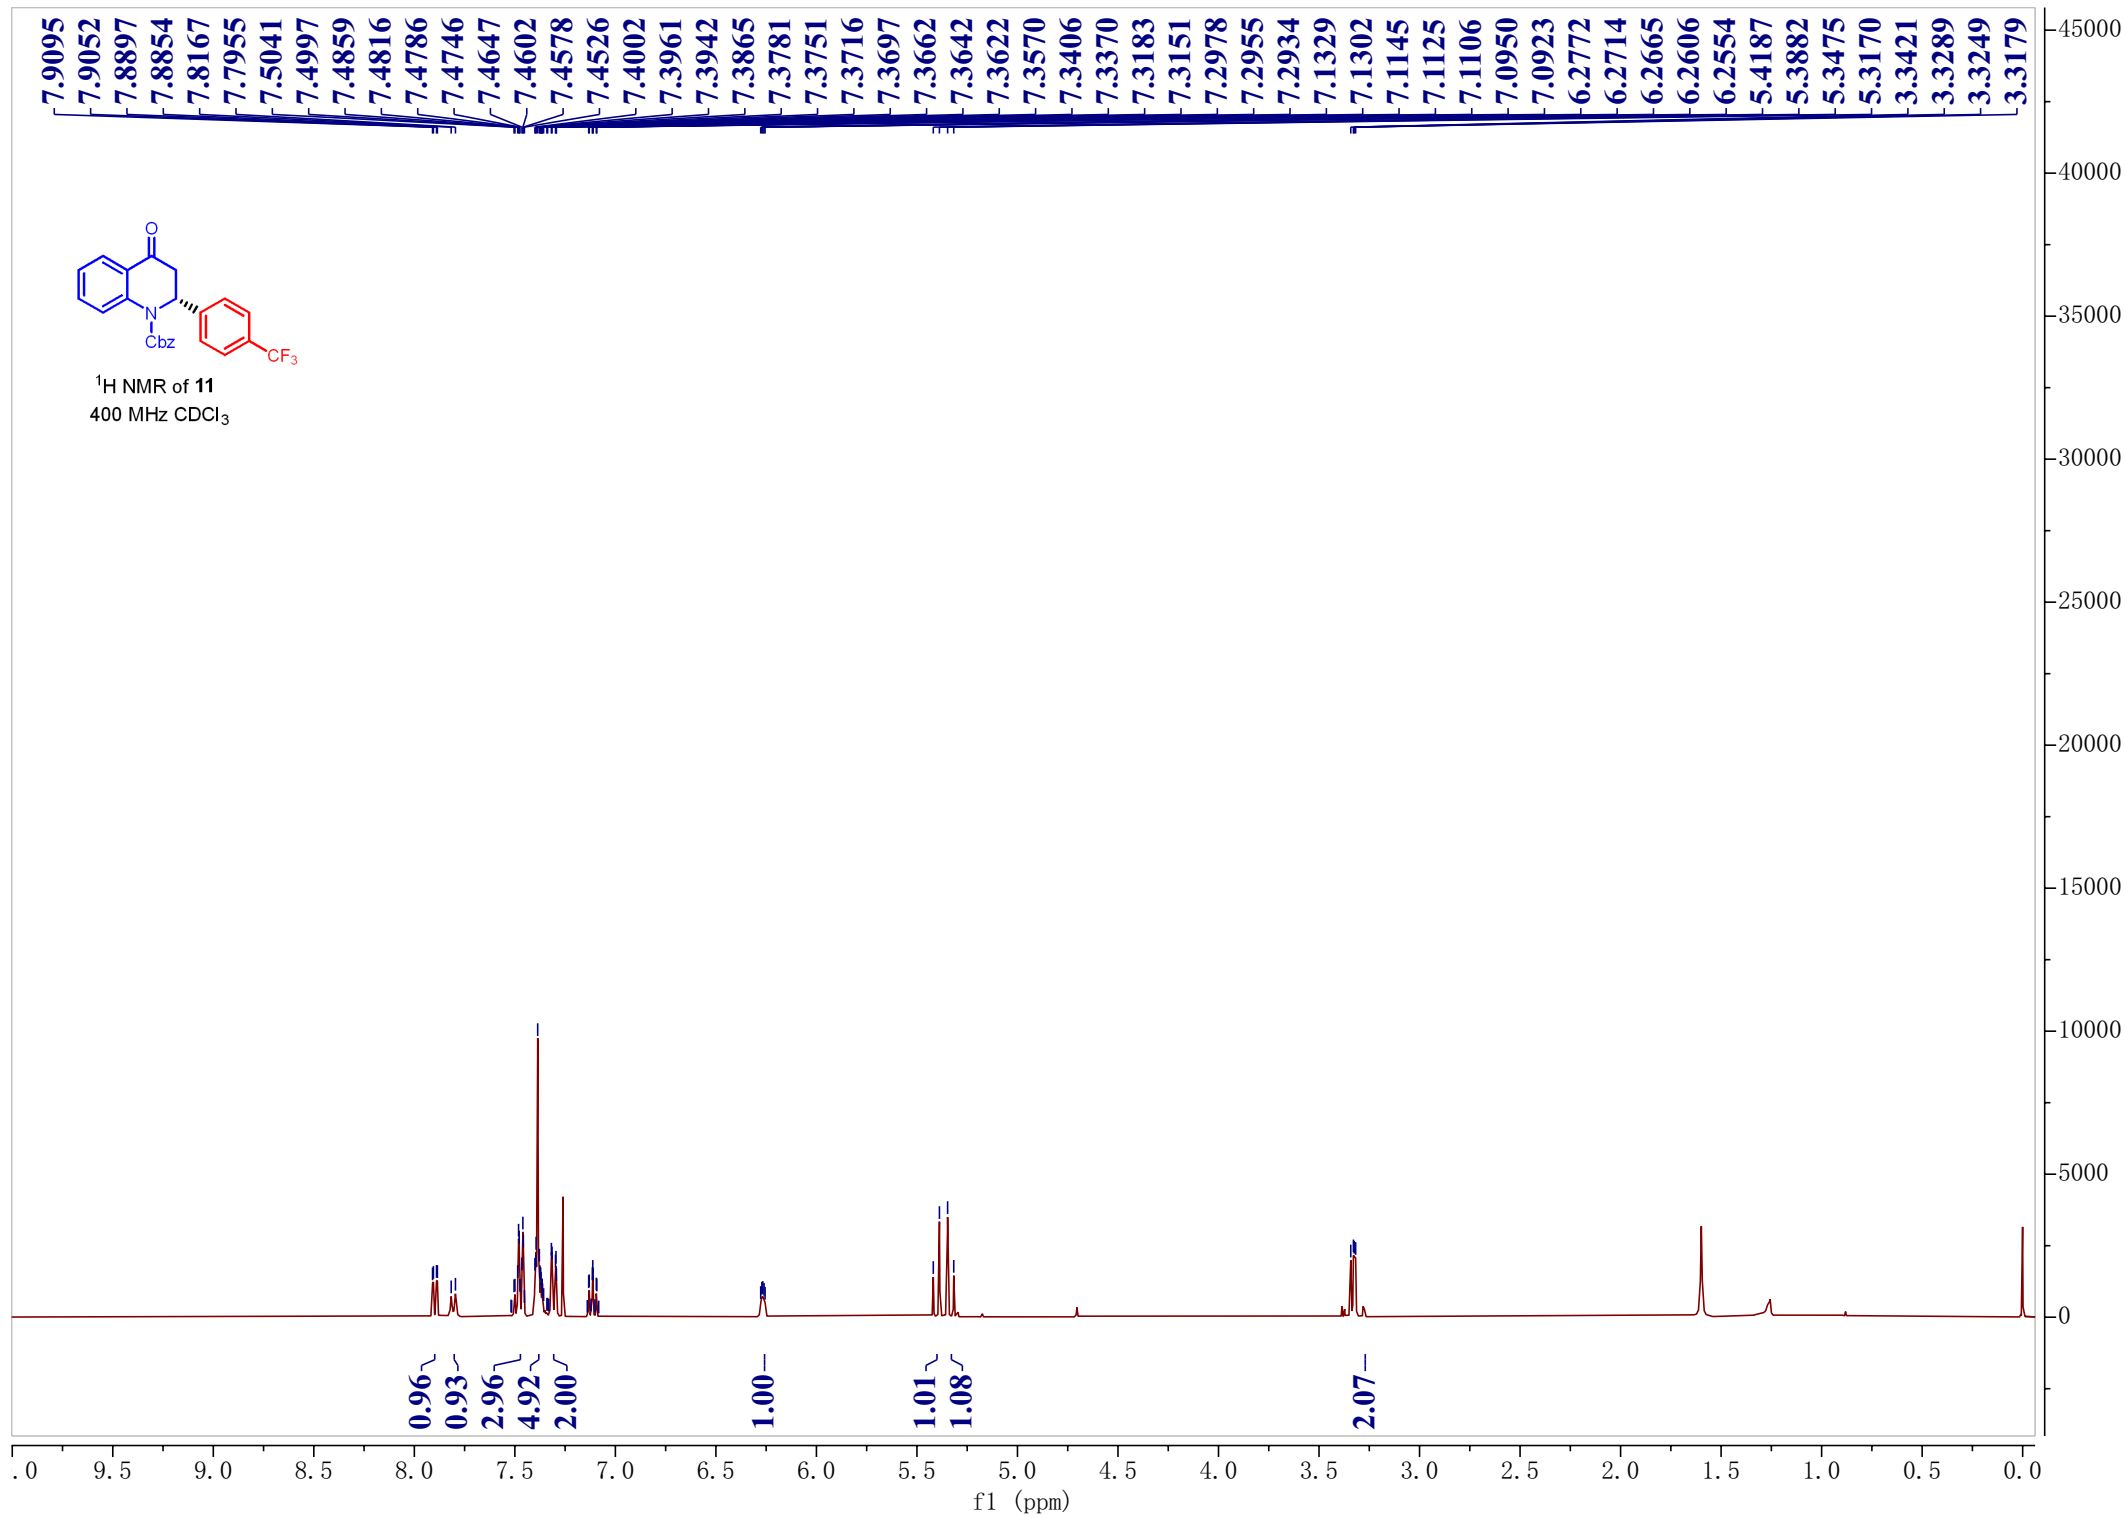

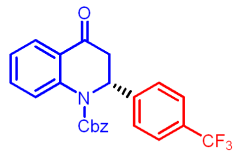

<sup>13</sup>C NMR of **11**  
126 MHz CDCl<sub>3</sub>

—192.8821

—154.1041

—141.4223

—139.7799

—135.7161

—134.7127

—128.8854

—128.6917

—128.3650

—127.0752

—126.7112

—126.6585

—124.9642

—124.3906

—124.3073

—122.7169

—68.6930

—53.7796

—43.1665

f1 (ppm)

0.0055

0.0050

0.0045

0.0040

0.0035

0.0030

0.0025

0.0020

0.0015

0.0010

0.0005

0.0000

-0.0005

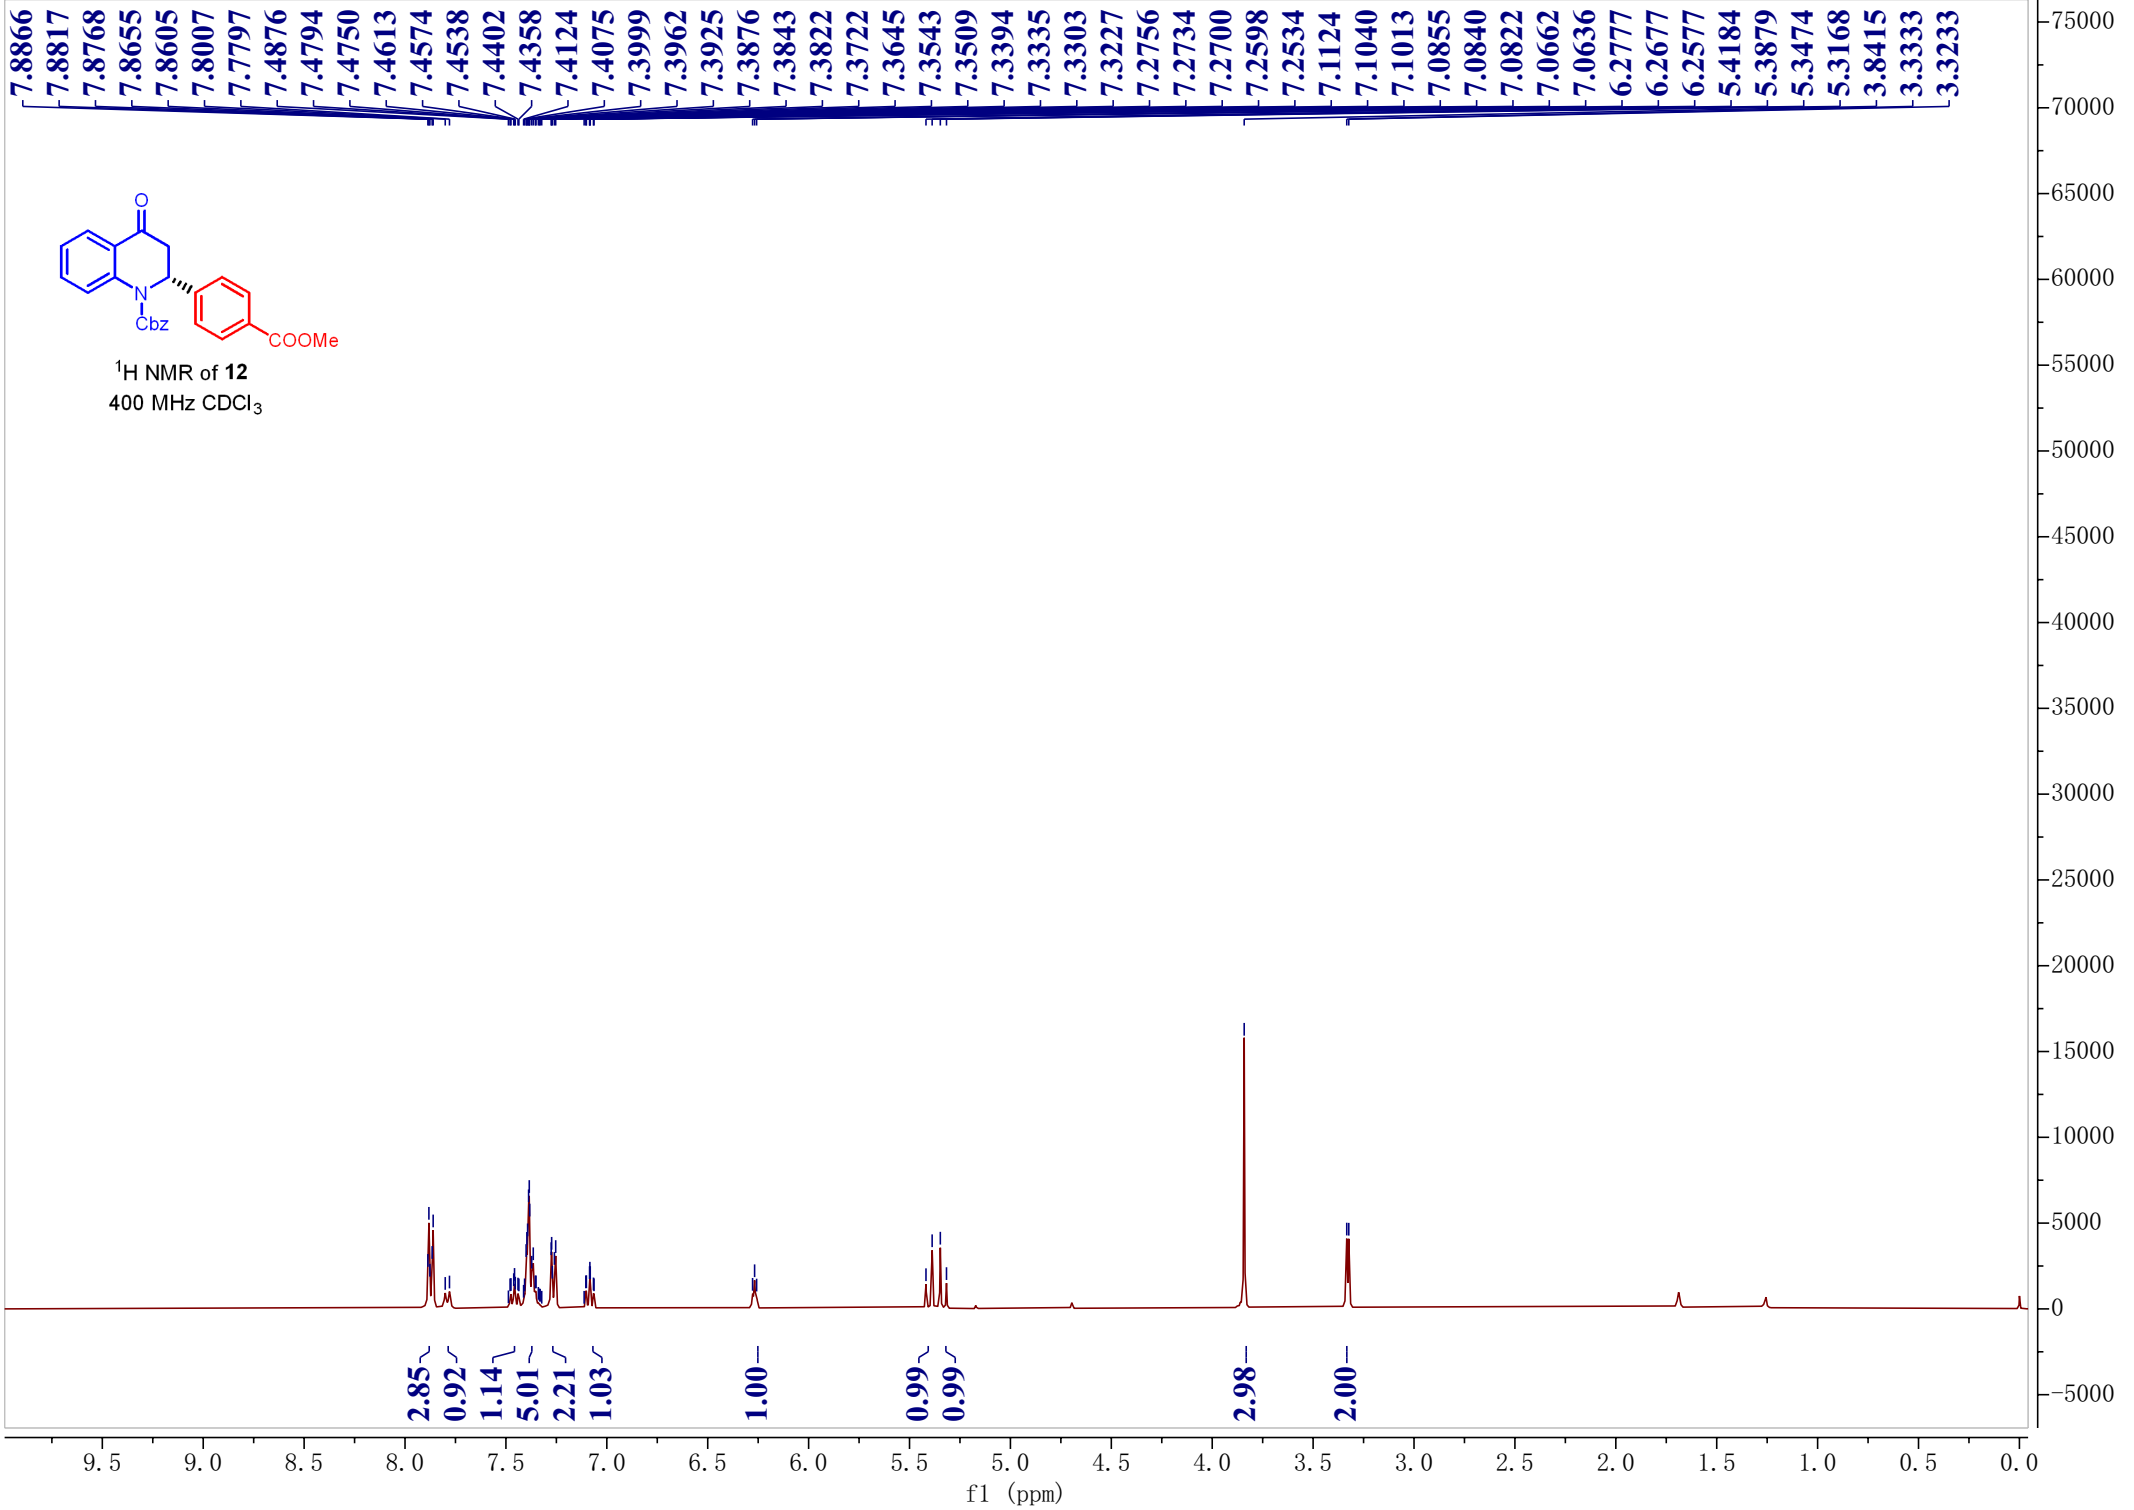

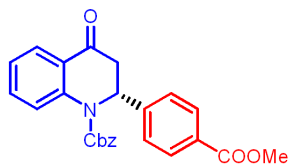

<sup>13</sup>C NMR of **12**  
101 MHz CDCl<sub>3</sub>

—192.3198  
—166.5926  
—154.3276  
—143.3292  
—141.3912  
—135.5382  
—134.8510  
—130.0261  
—129.6104  
—128.8558  
—128.7070  
—128.6591  
—128.3308  
—127.0954  
—127.0796  
—126.7560  
—125.0424  
—124.5613  
—124.5180  
—68.8274  
—56.2184  
—52.2416  
—42.3402

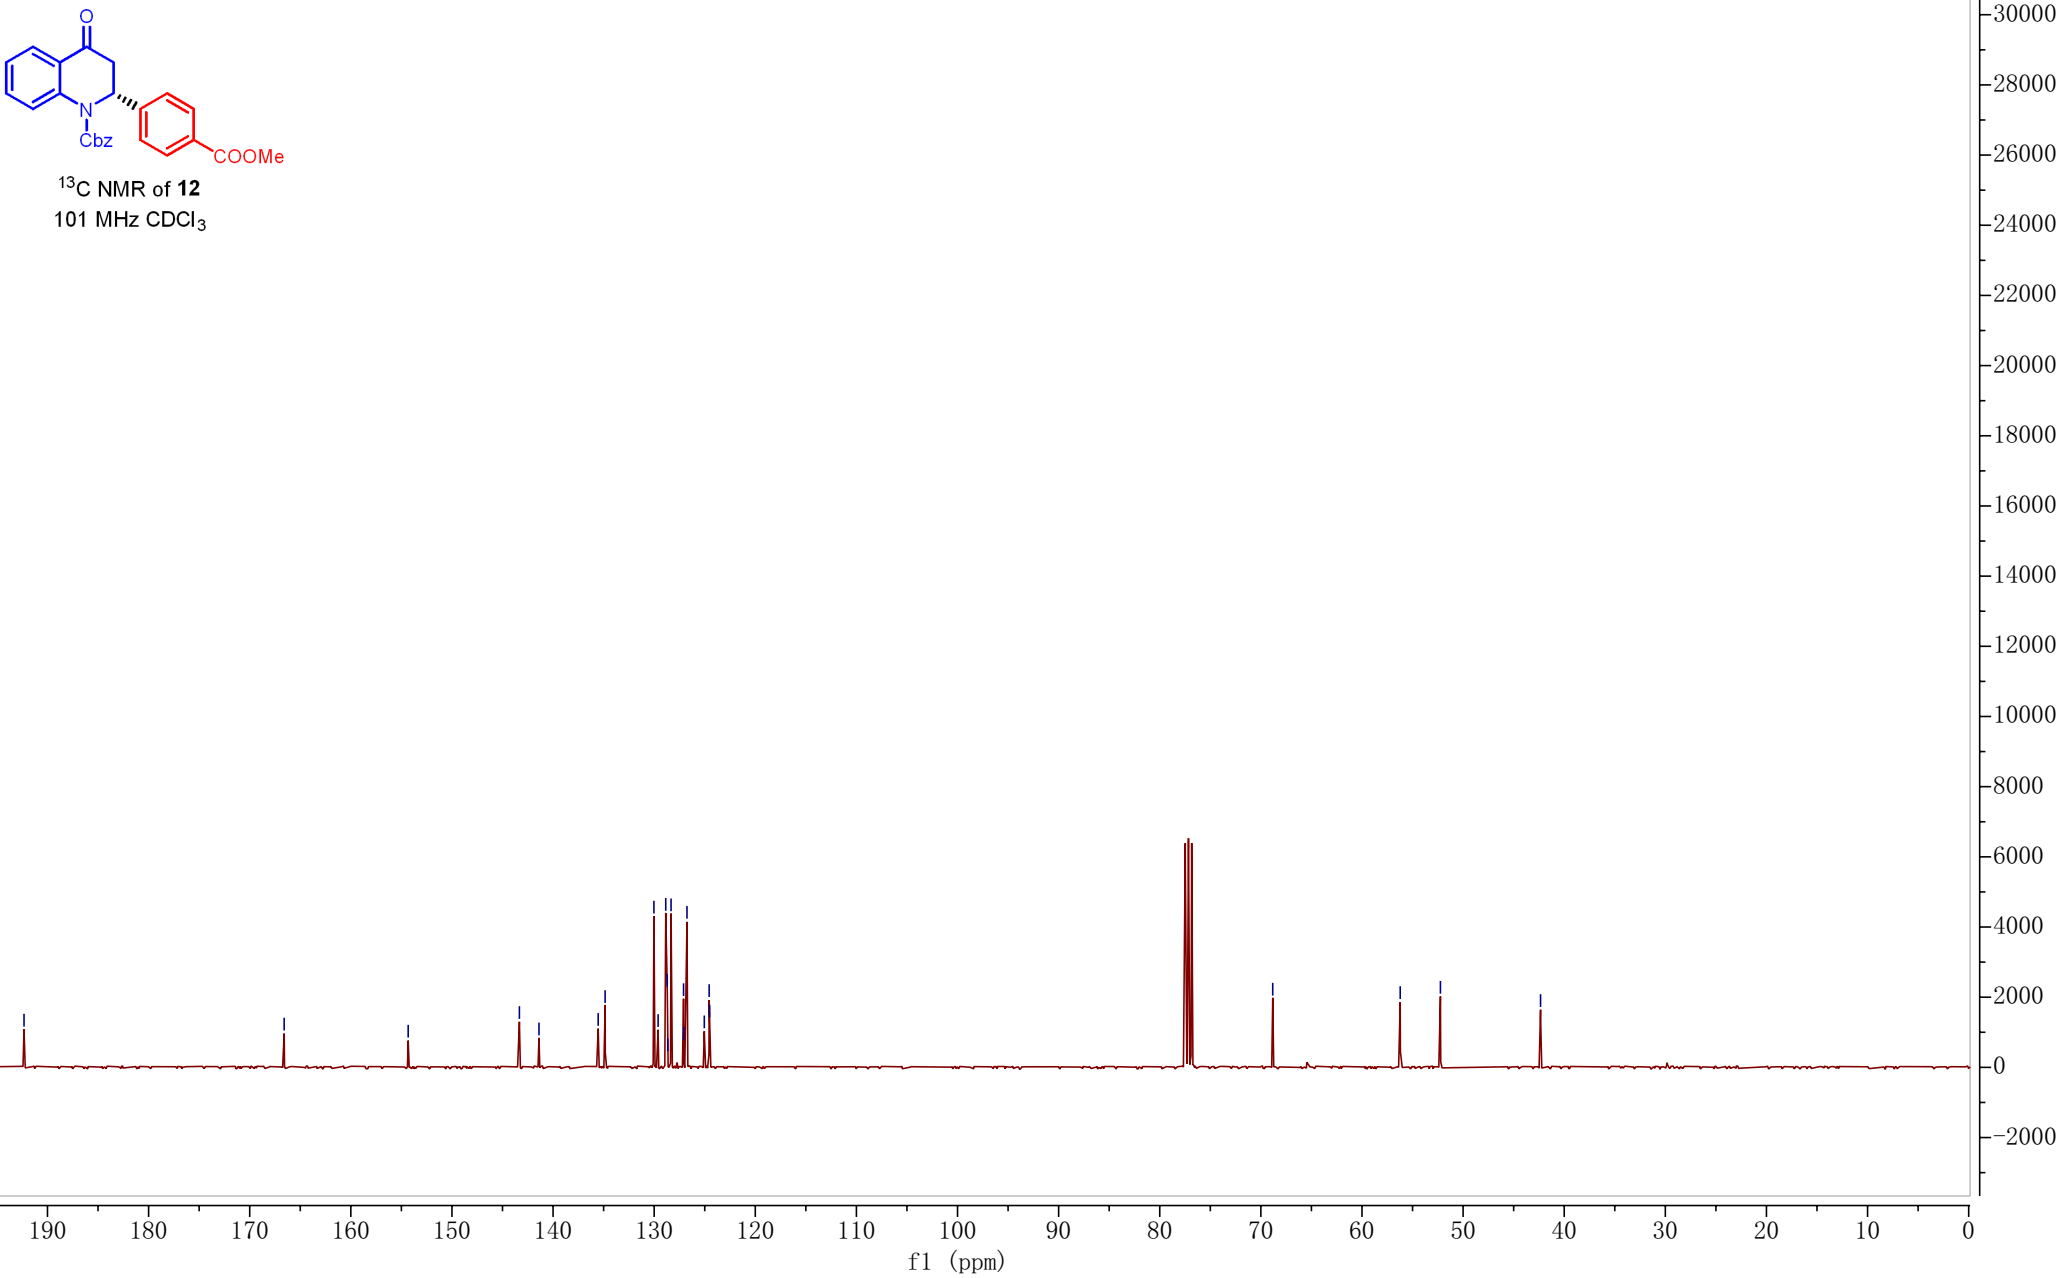

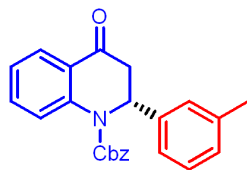

<sup>1</sup>H NMR of **13**  
400 MHz CDCl<sub>3</sub>

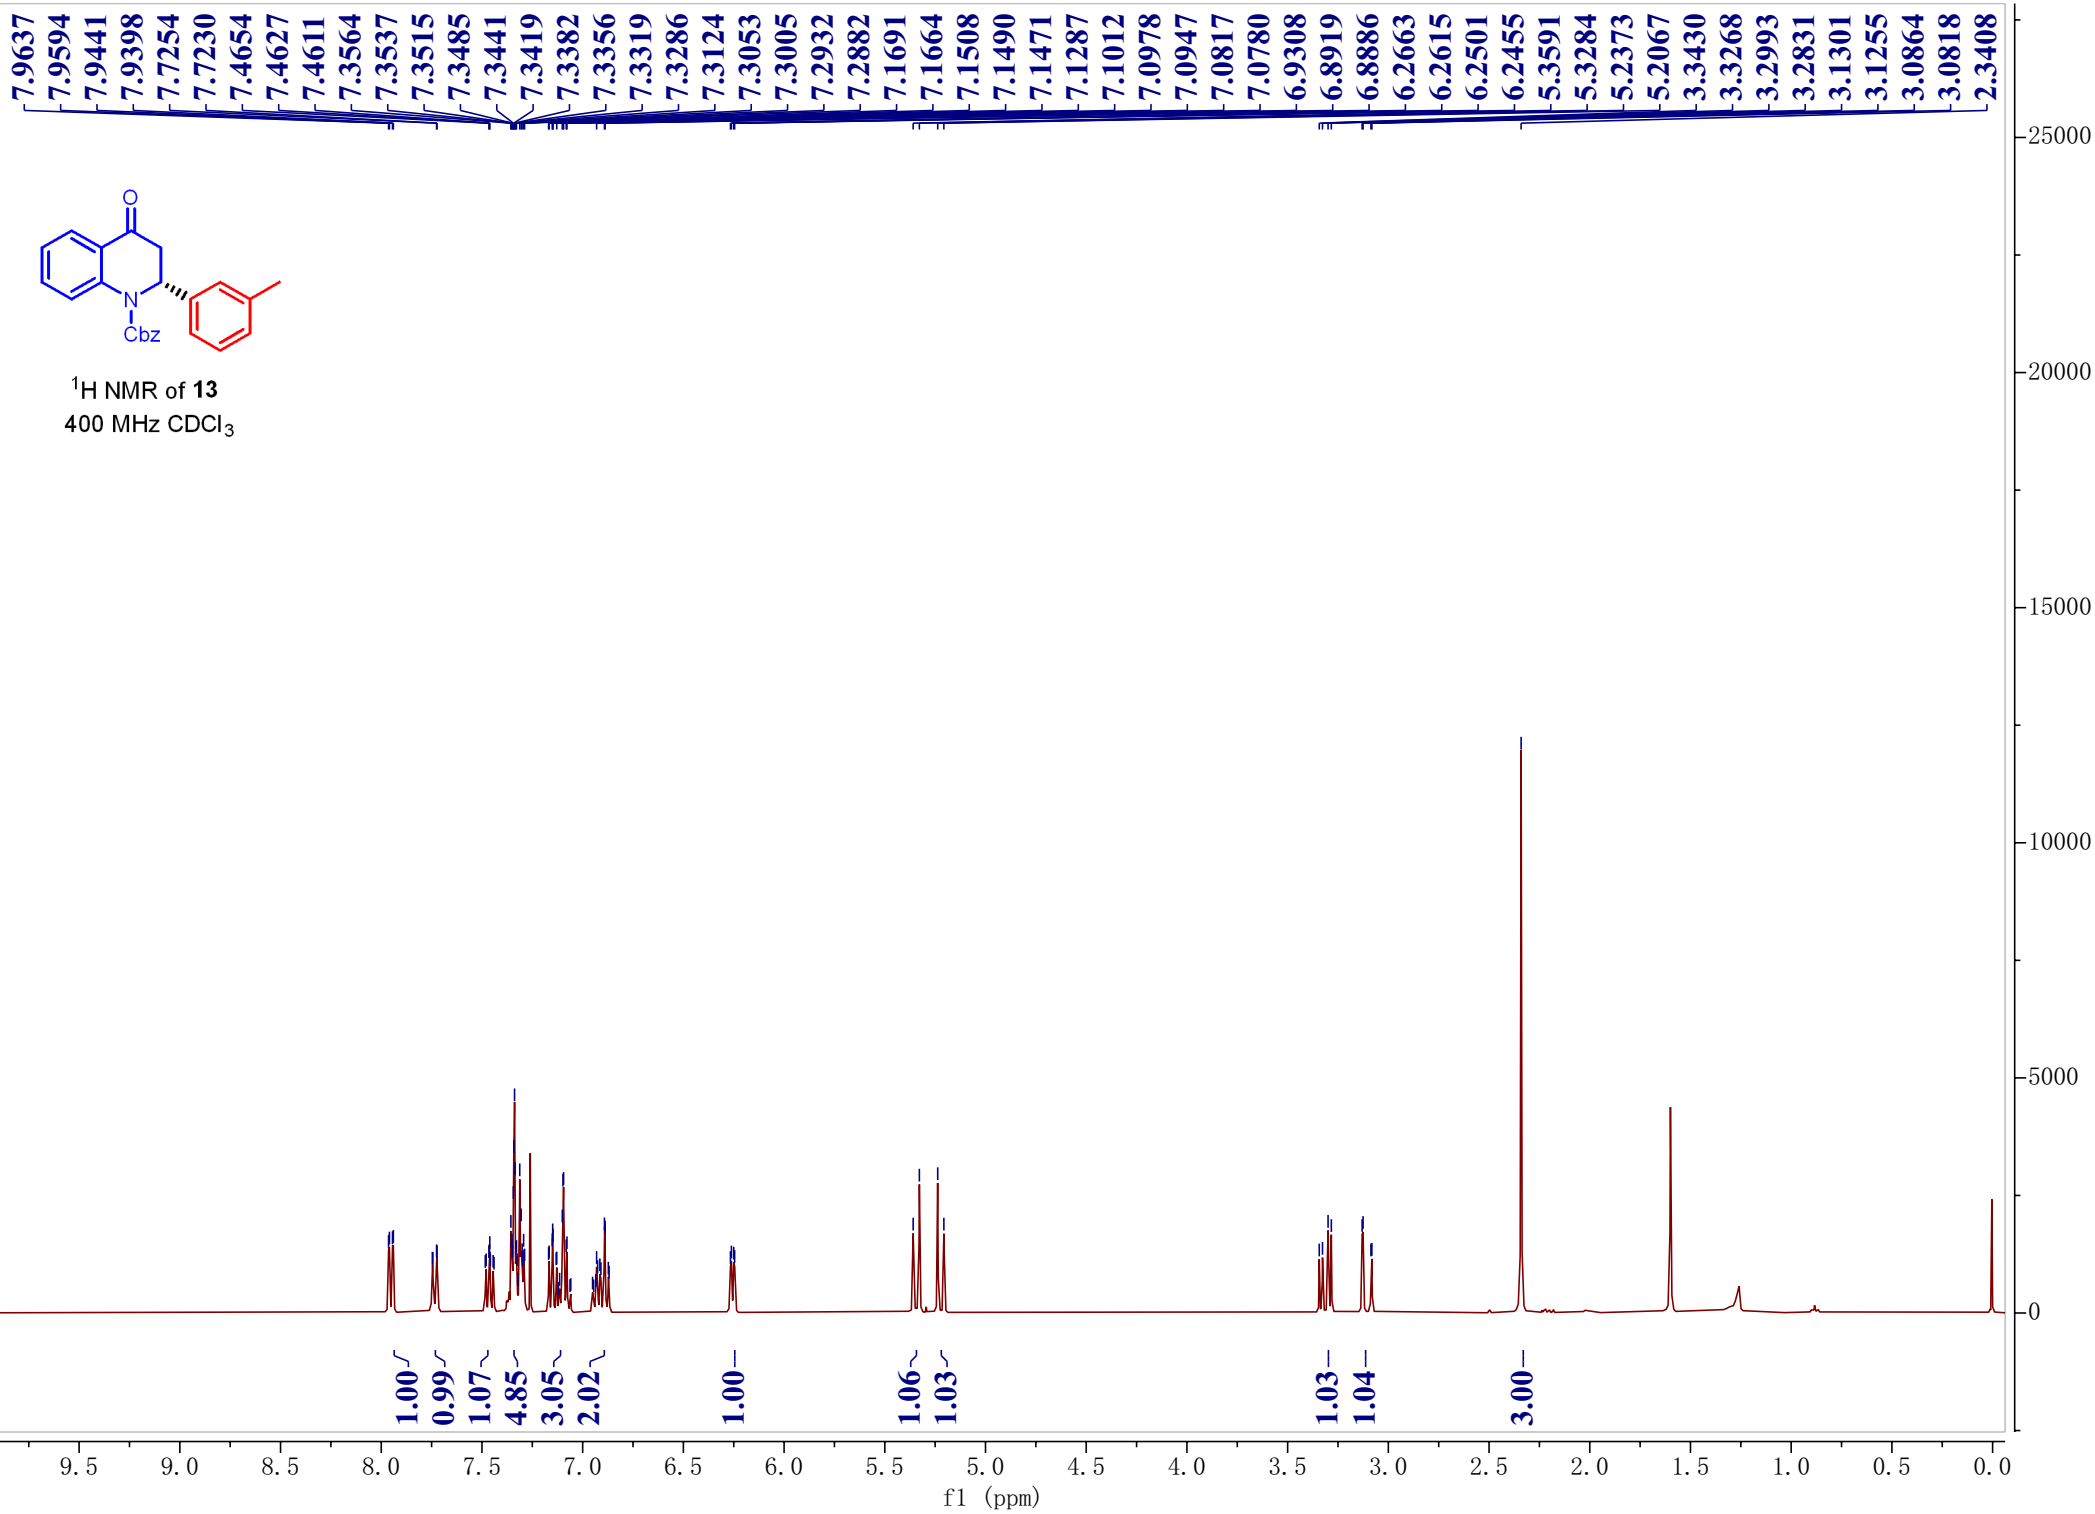

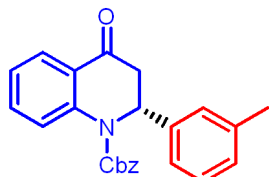

<sup>13</sup>C NMR of **13**  
101 MHz CDCl<sub>3</sub>

193.5160  
154.1162  
142.0711  
136.7960  
136.4167  
135.7354  
134.6871  
131.3847  
128.7611  
128.5436  
128.1786  
127.9956  
126.8508  
126.2918  
126.0705  
125.8446  
124.7857  
124.7144  
68.5789  
54.7600  
42.7886  
19.7079

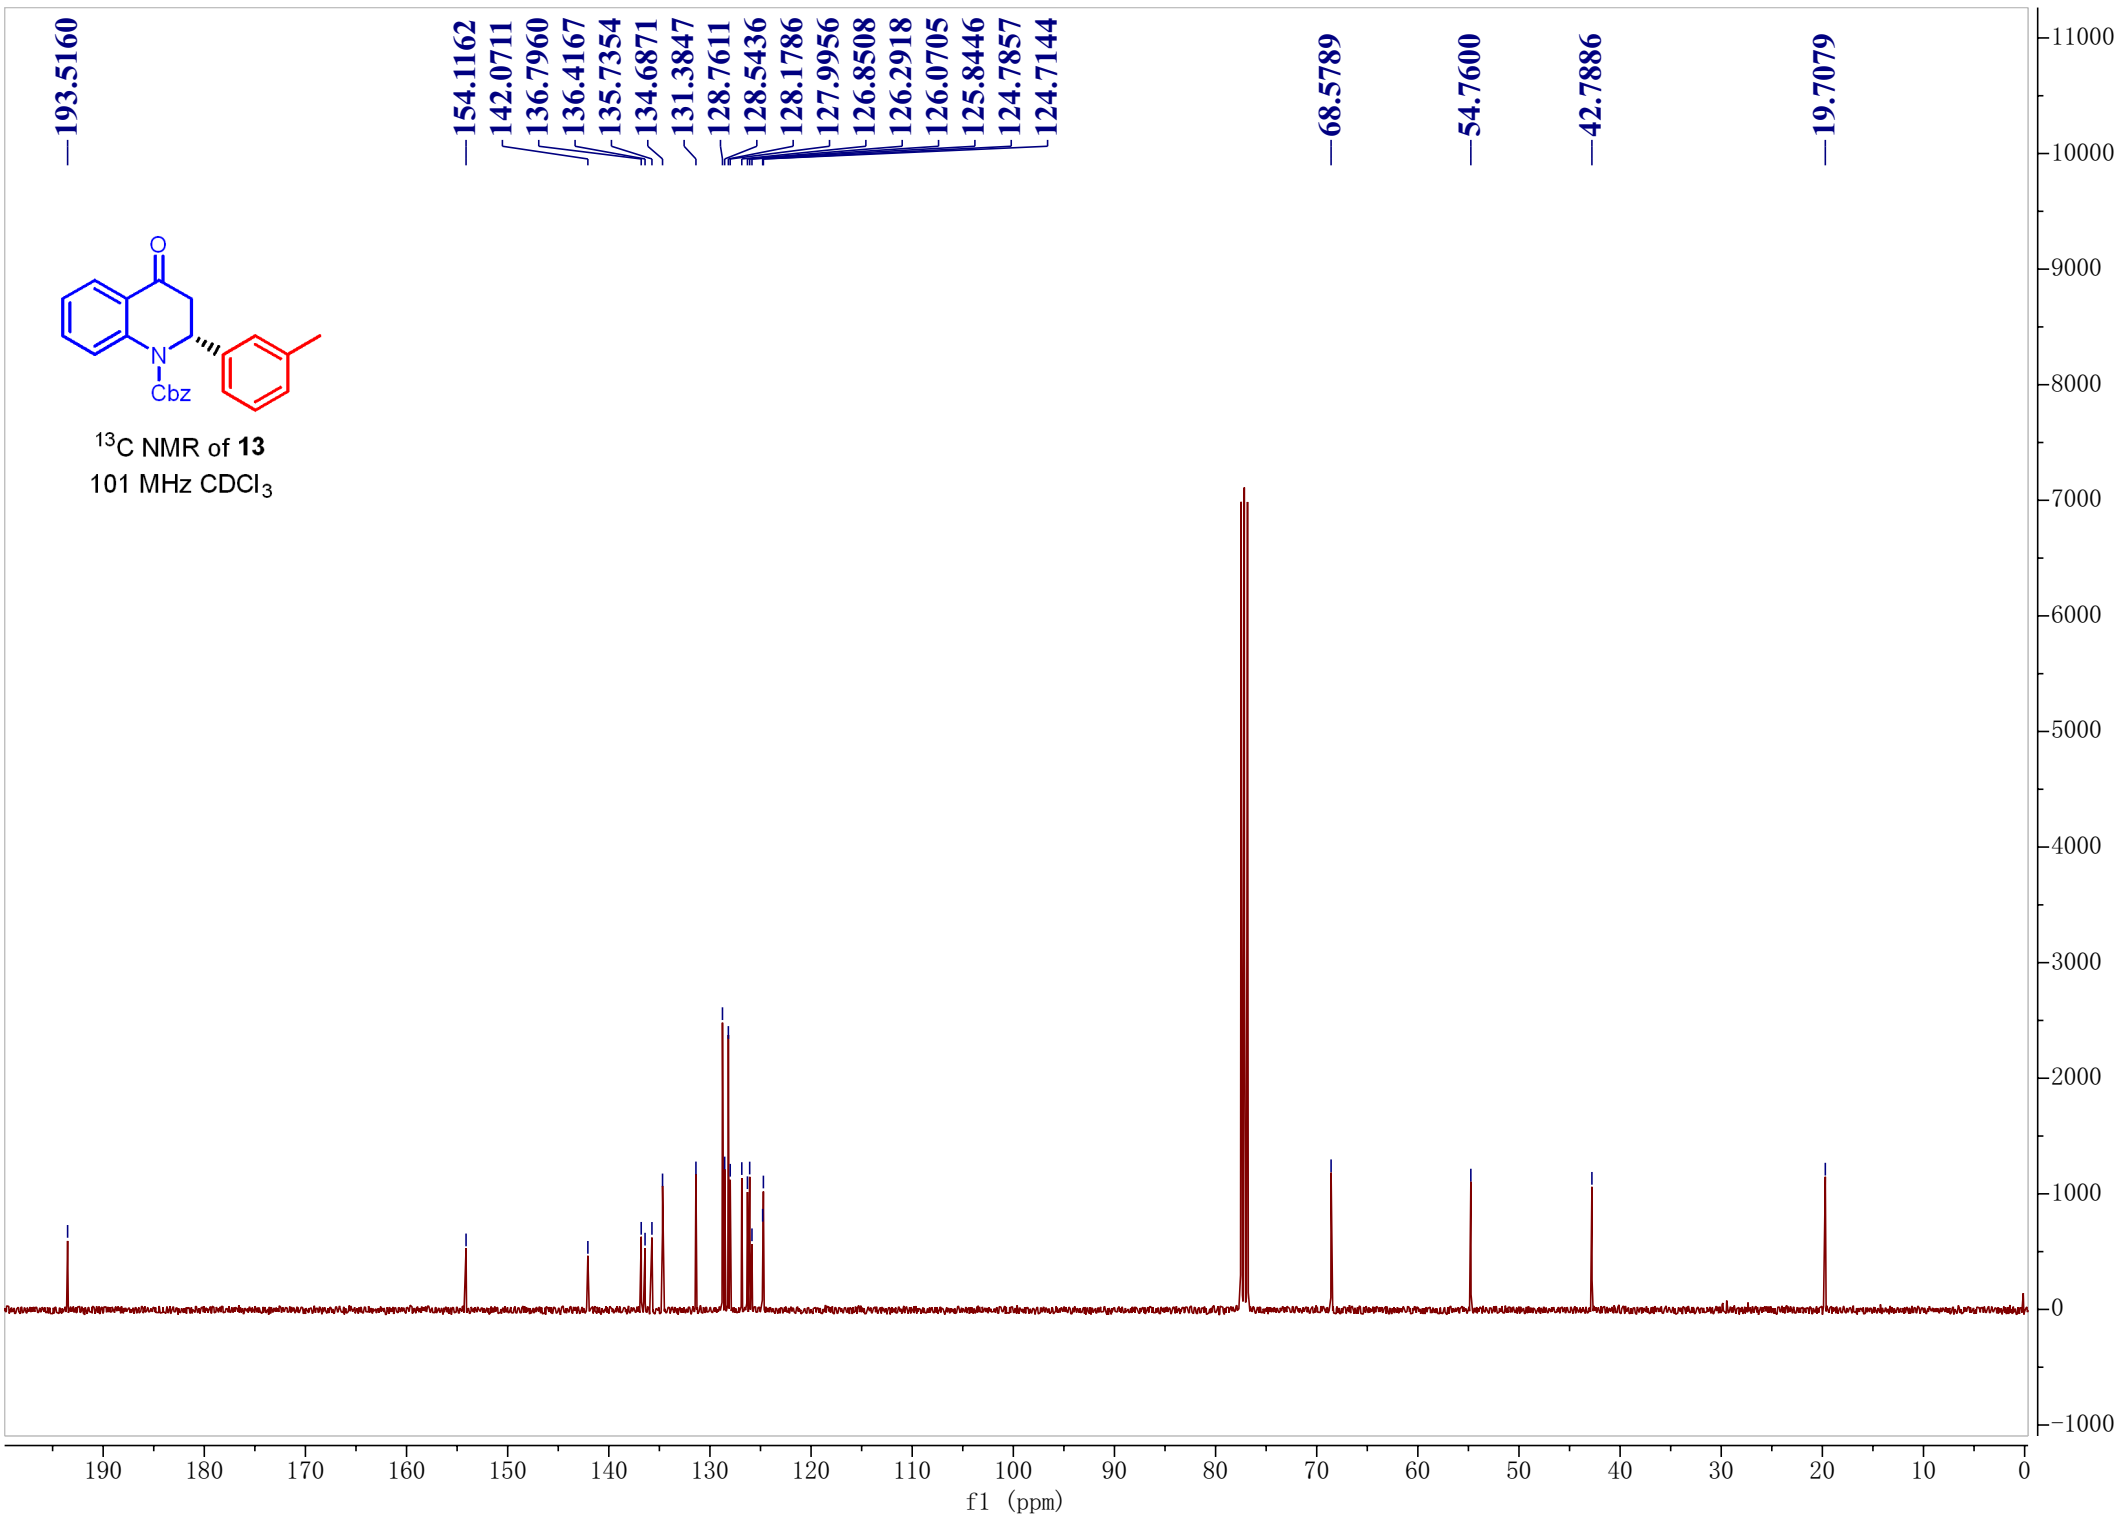



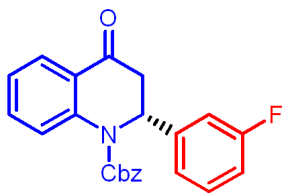

<sup>1</sup>H NMR of **14**  
400 MHz CDCl<sub>3</sub>

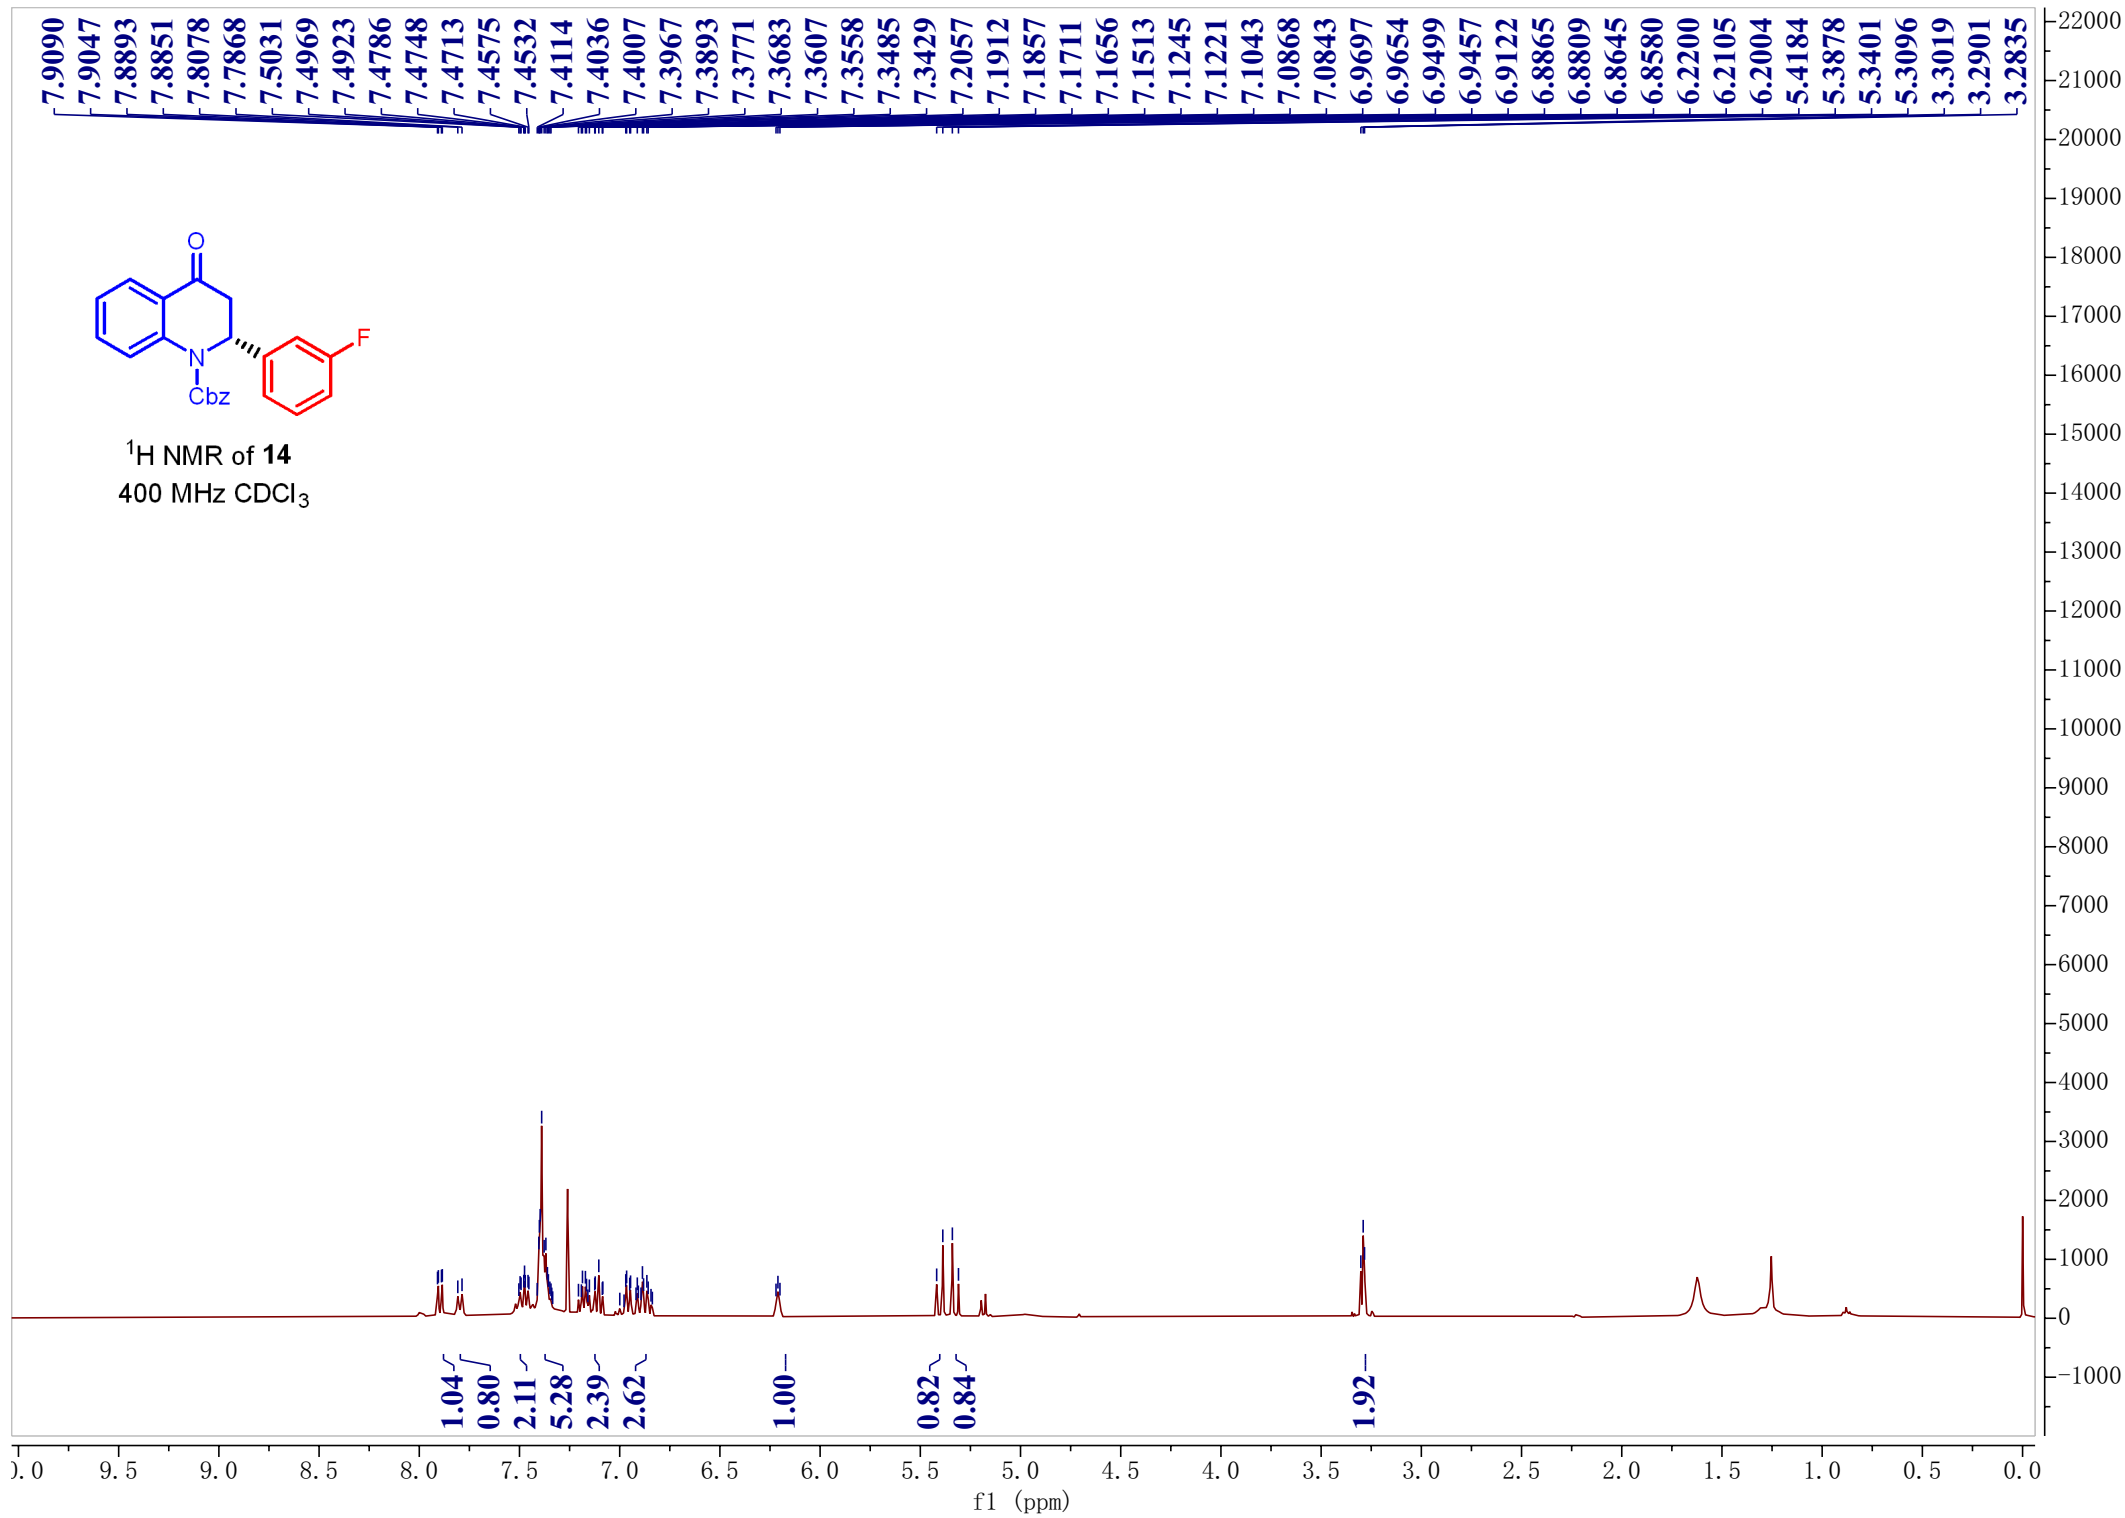

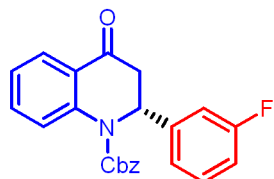

<sup>13</sup>C NMR of 14  
101 MHz CDCl<sub>3</sub>

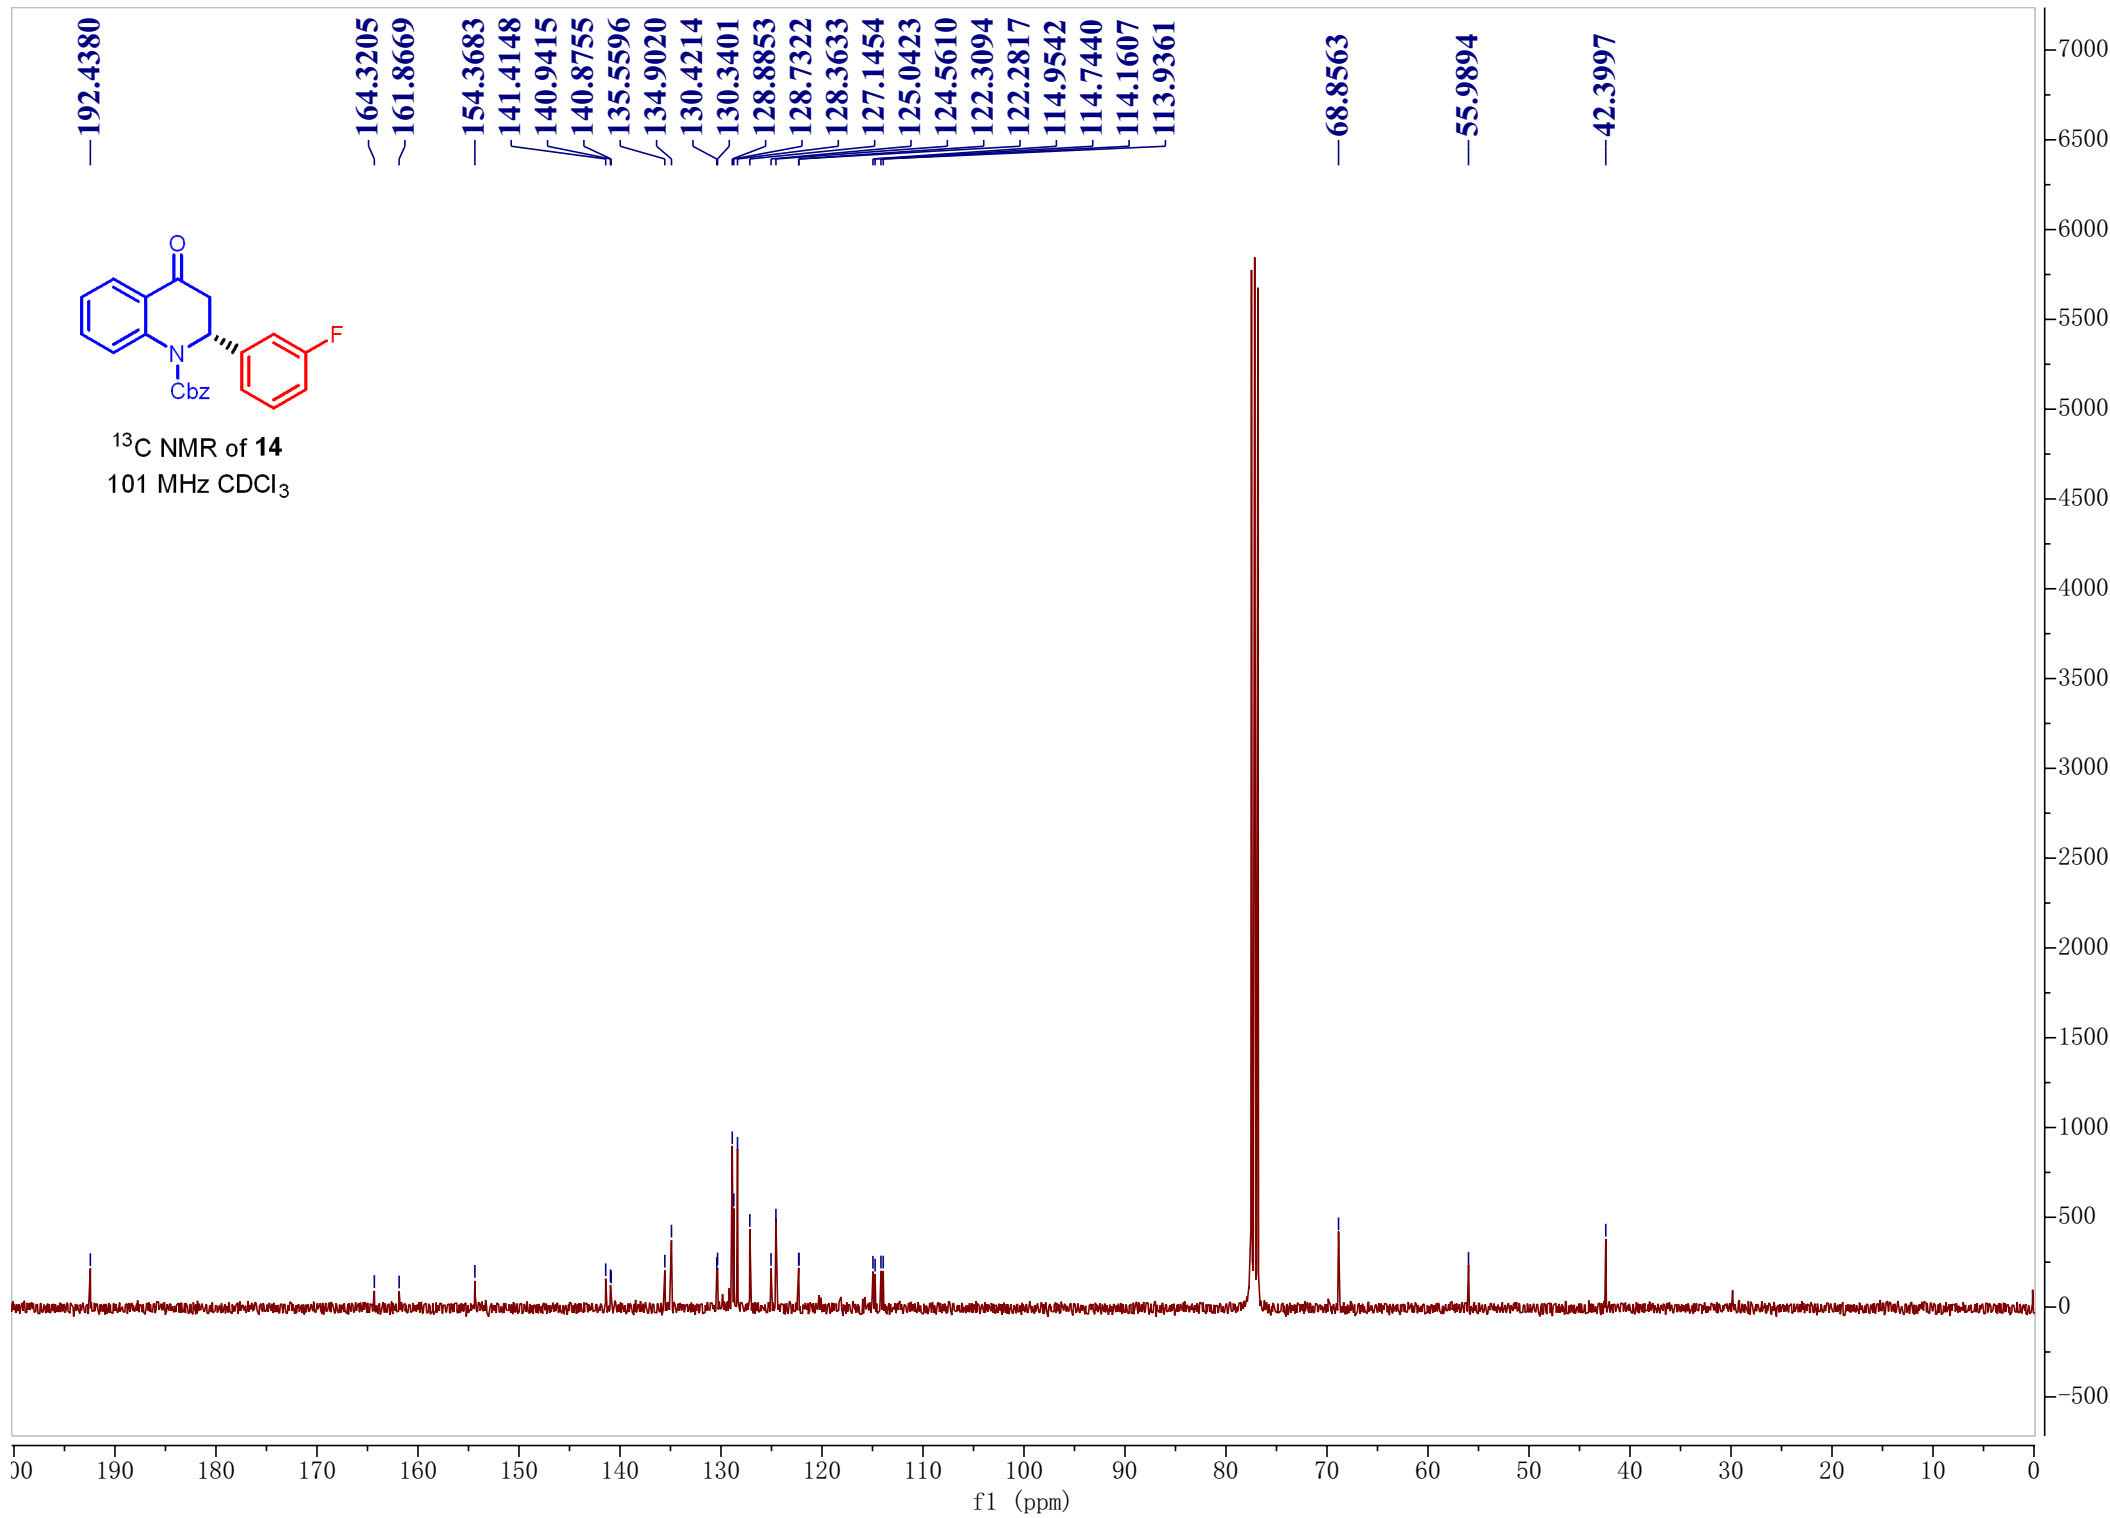

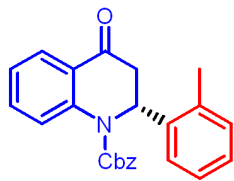

<sup>1</sup>H NMR of **15**  
400 MHz CDCl<sub>3</sub>

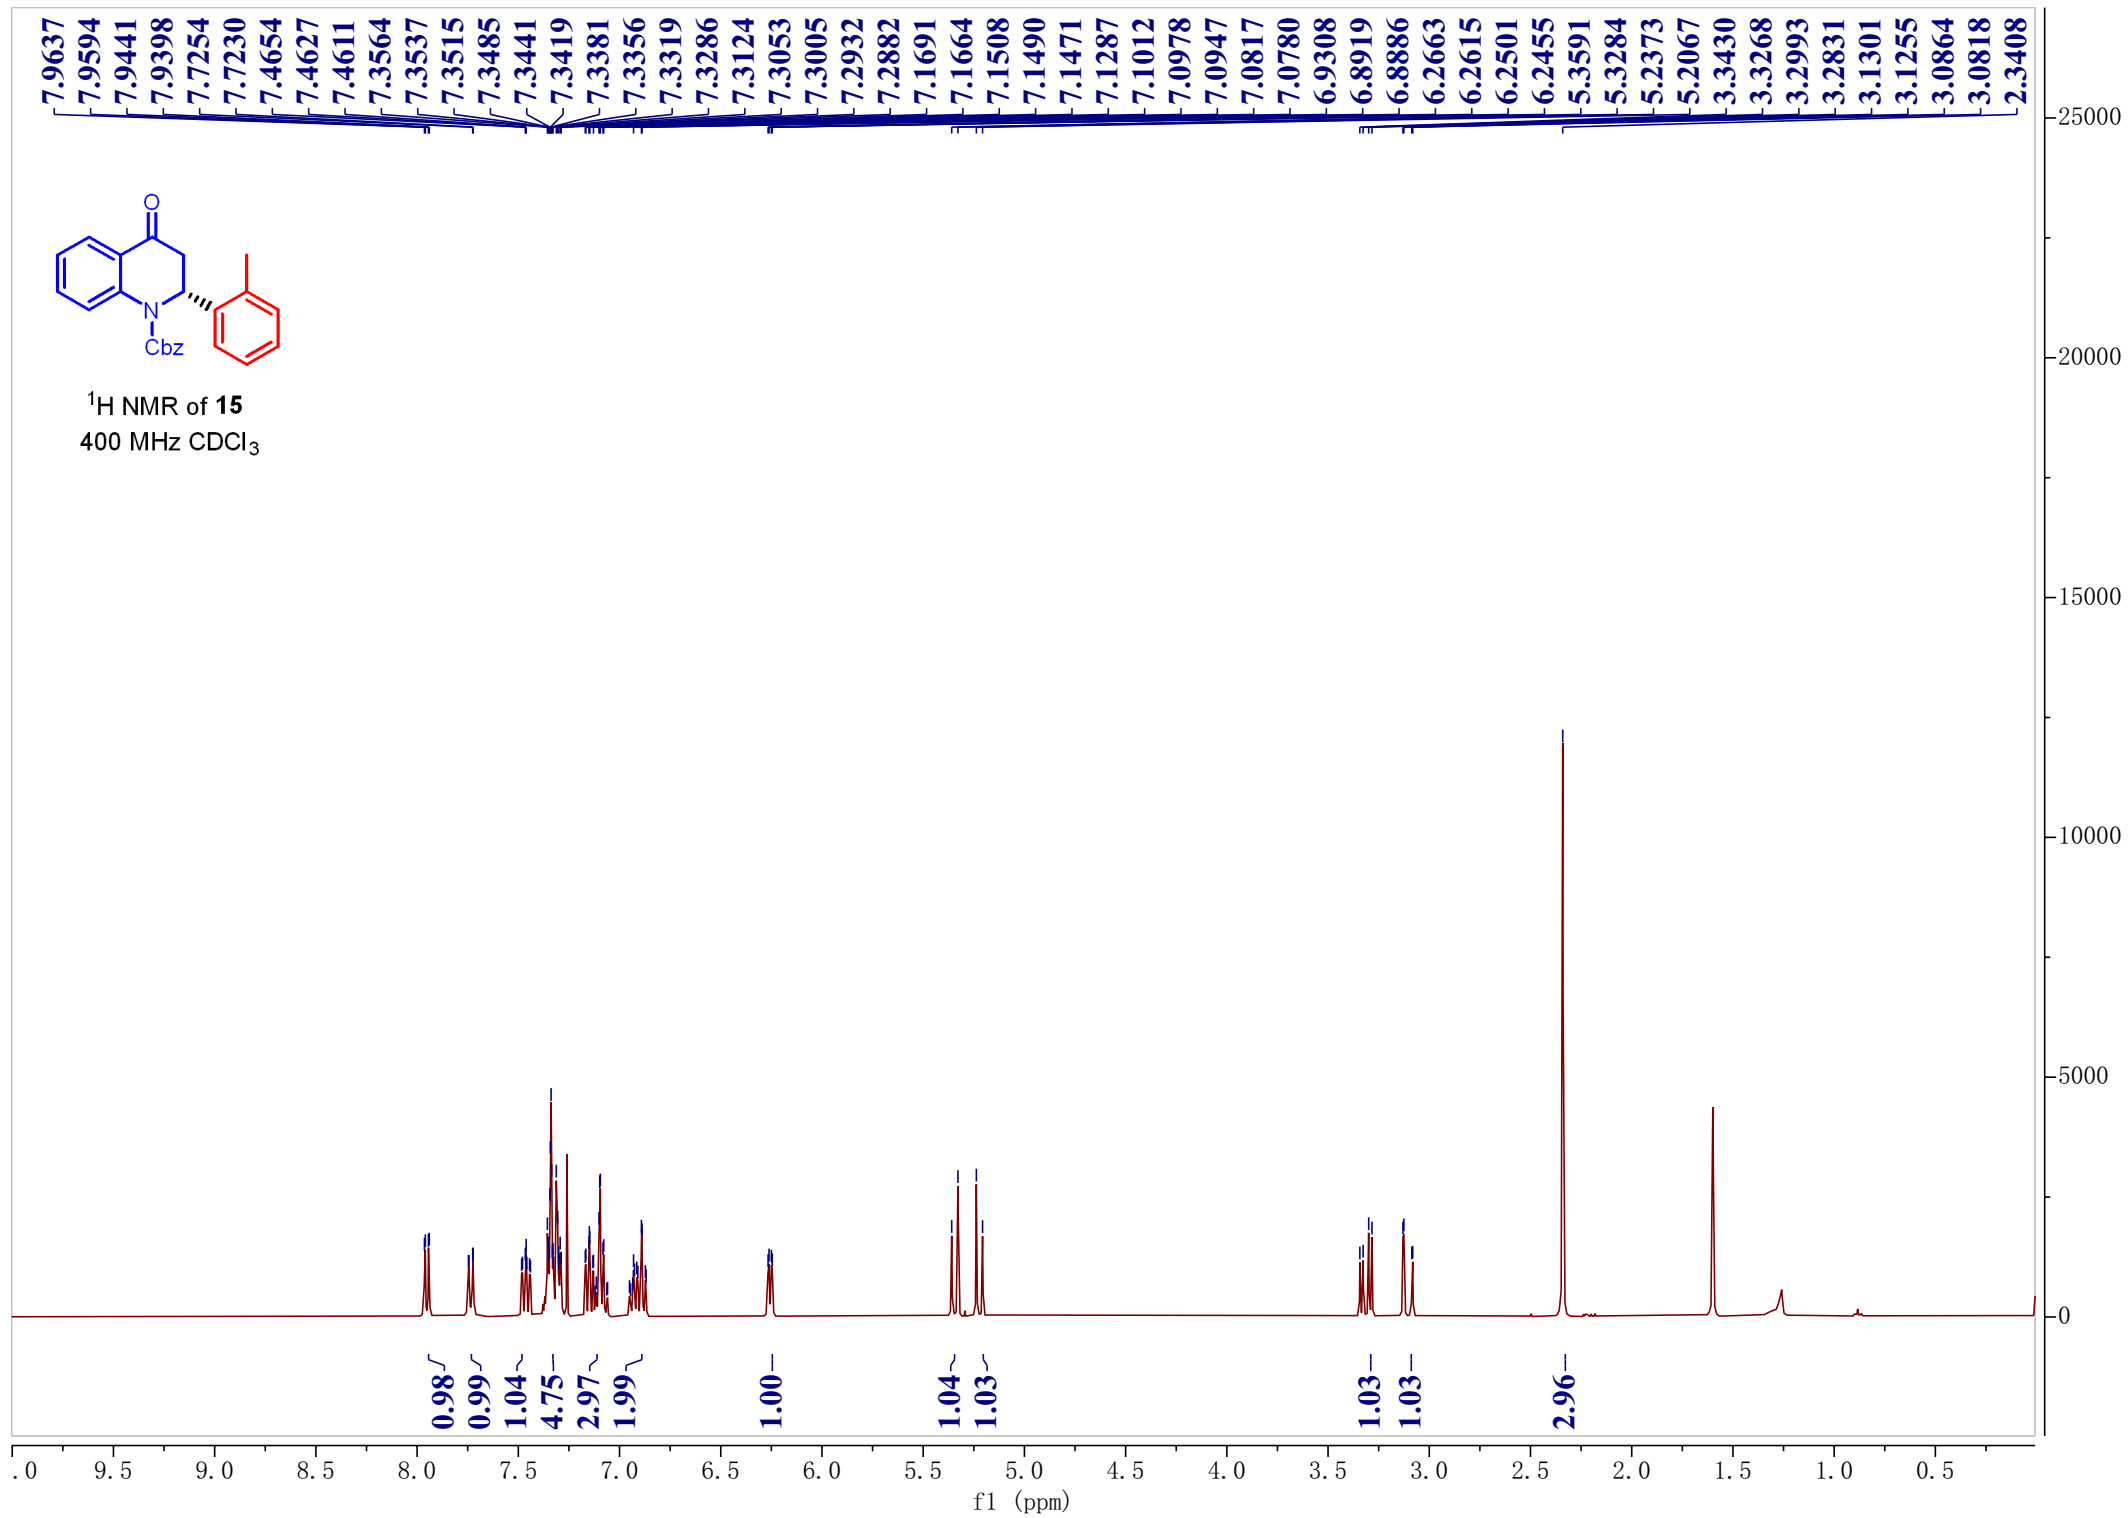

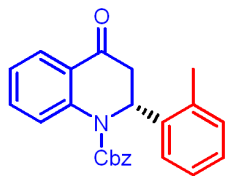

$^{13}\text{C}$  NMR of **15**  
101 MHz  $\text{CDCl}_3$

193.5160  
154.1162  
142.0711  
136.7960  
136.4167  
135.7354  
134.6871  
131.3847  
128.7611  
128.5436  
128.1786  
127.9956  
126.8508  
126.2918  
126.0705  
125.8446  
124.7857  
124.7144  
68.5789  
54.7600  
42.7886  
19.7079

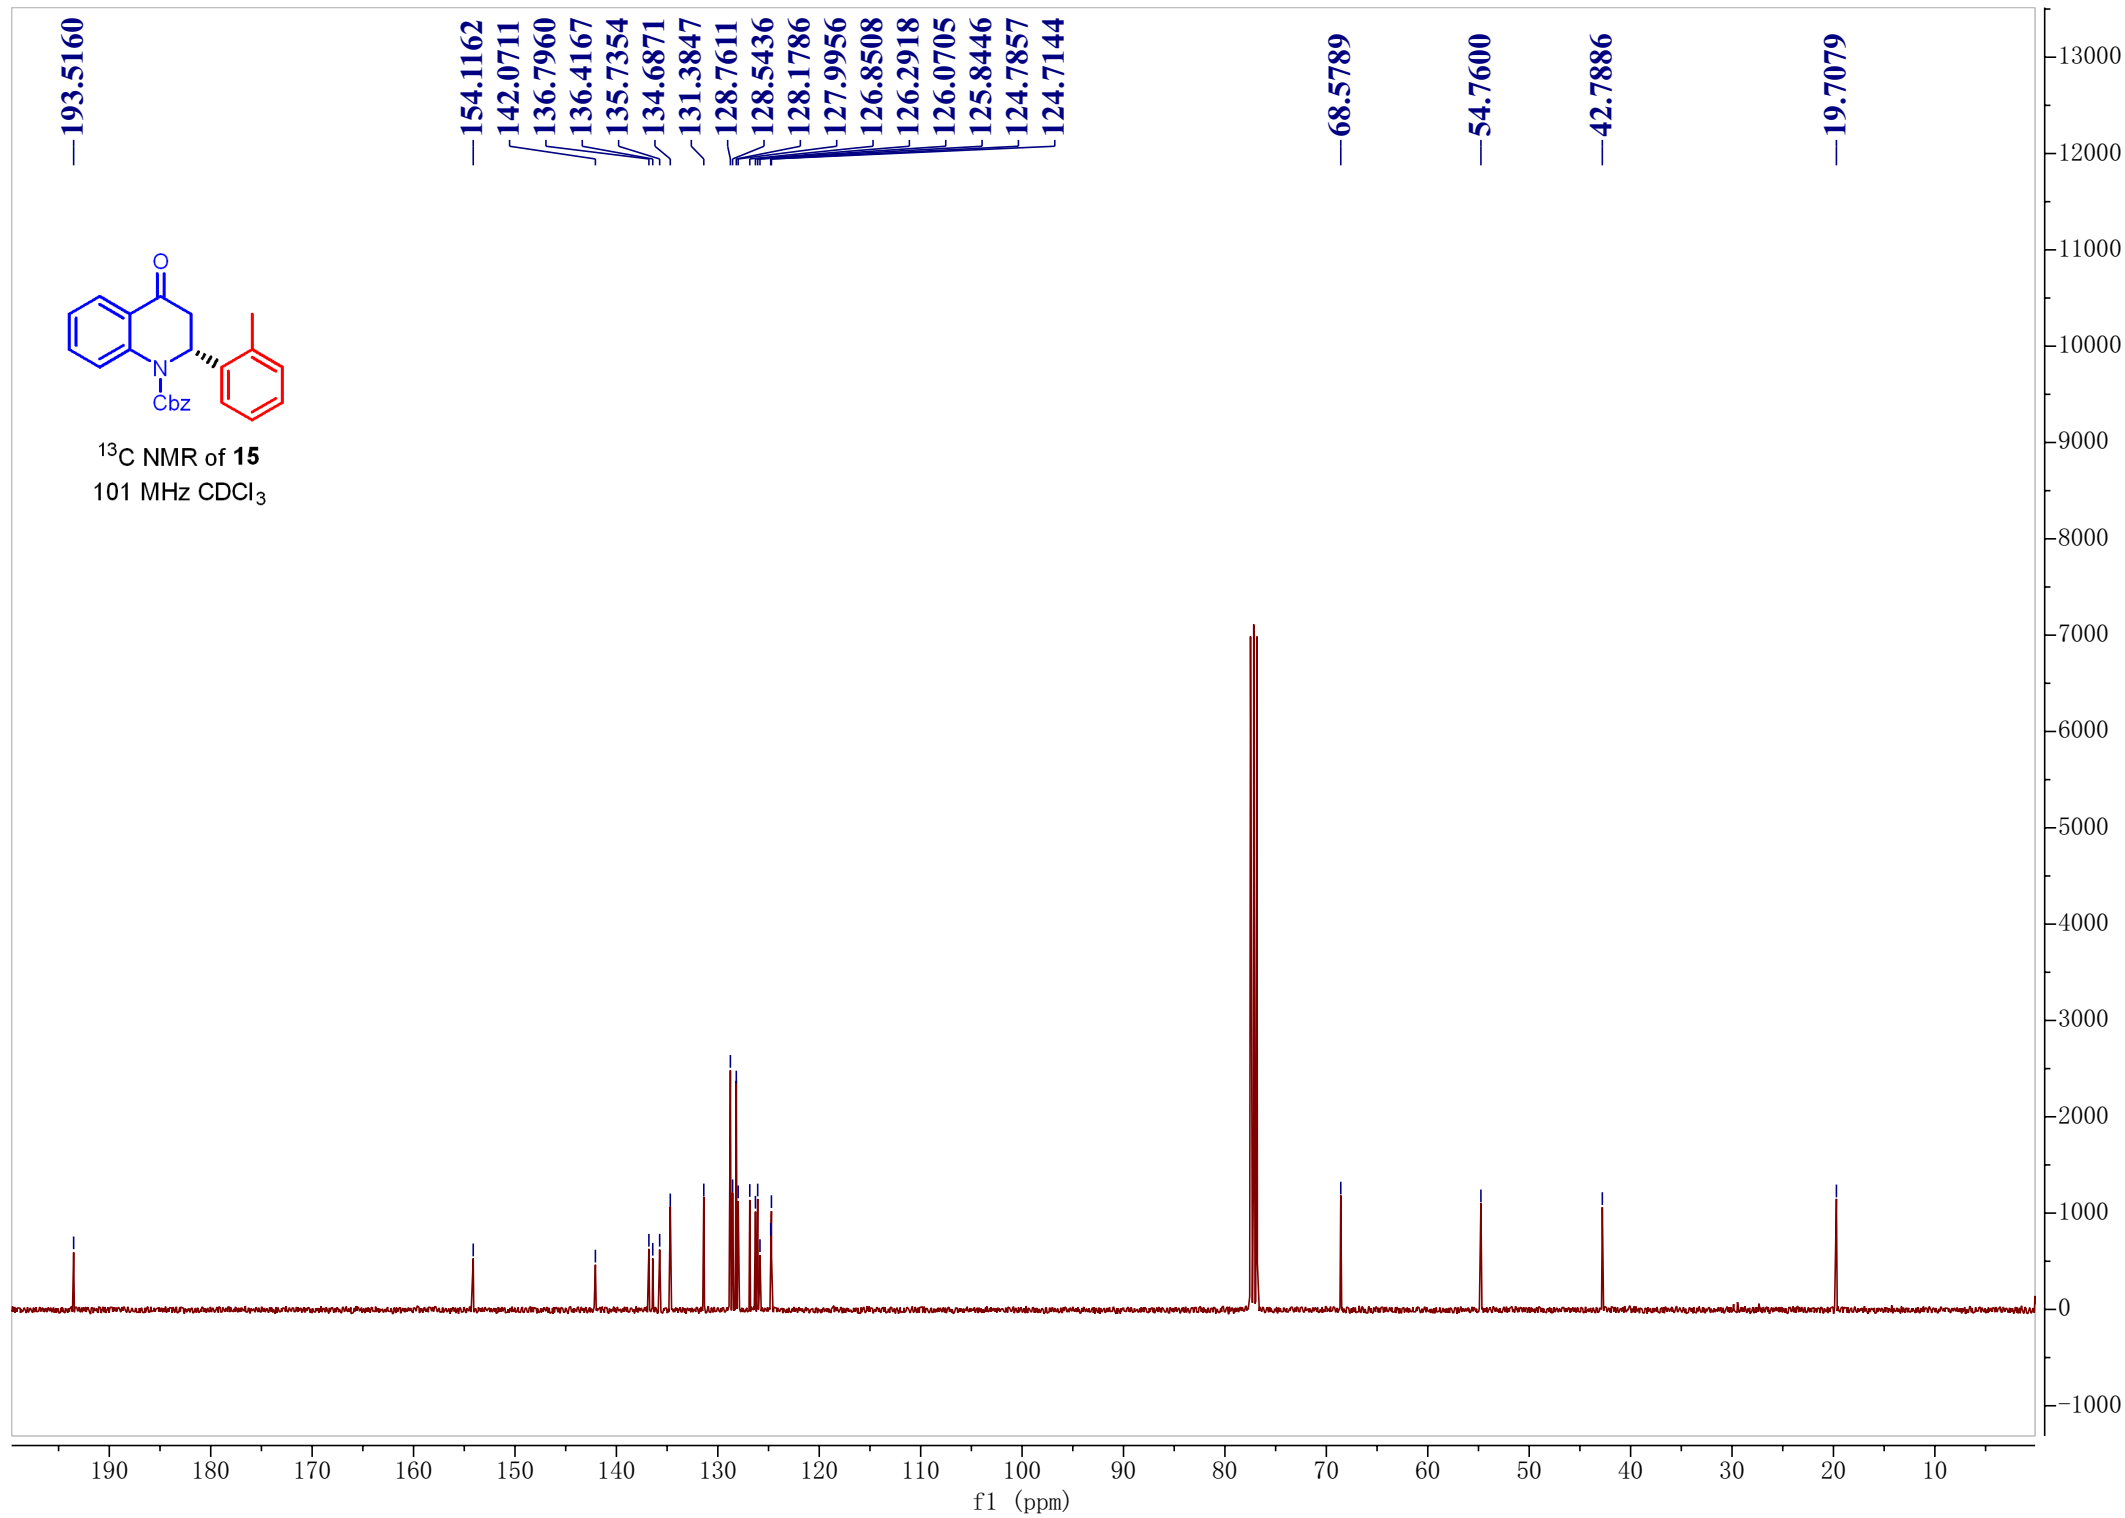

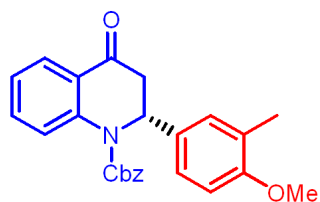

<sup>1</sup>H NMR of 16  
500 MHz CDCl<sub>3</sub>

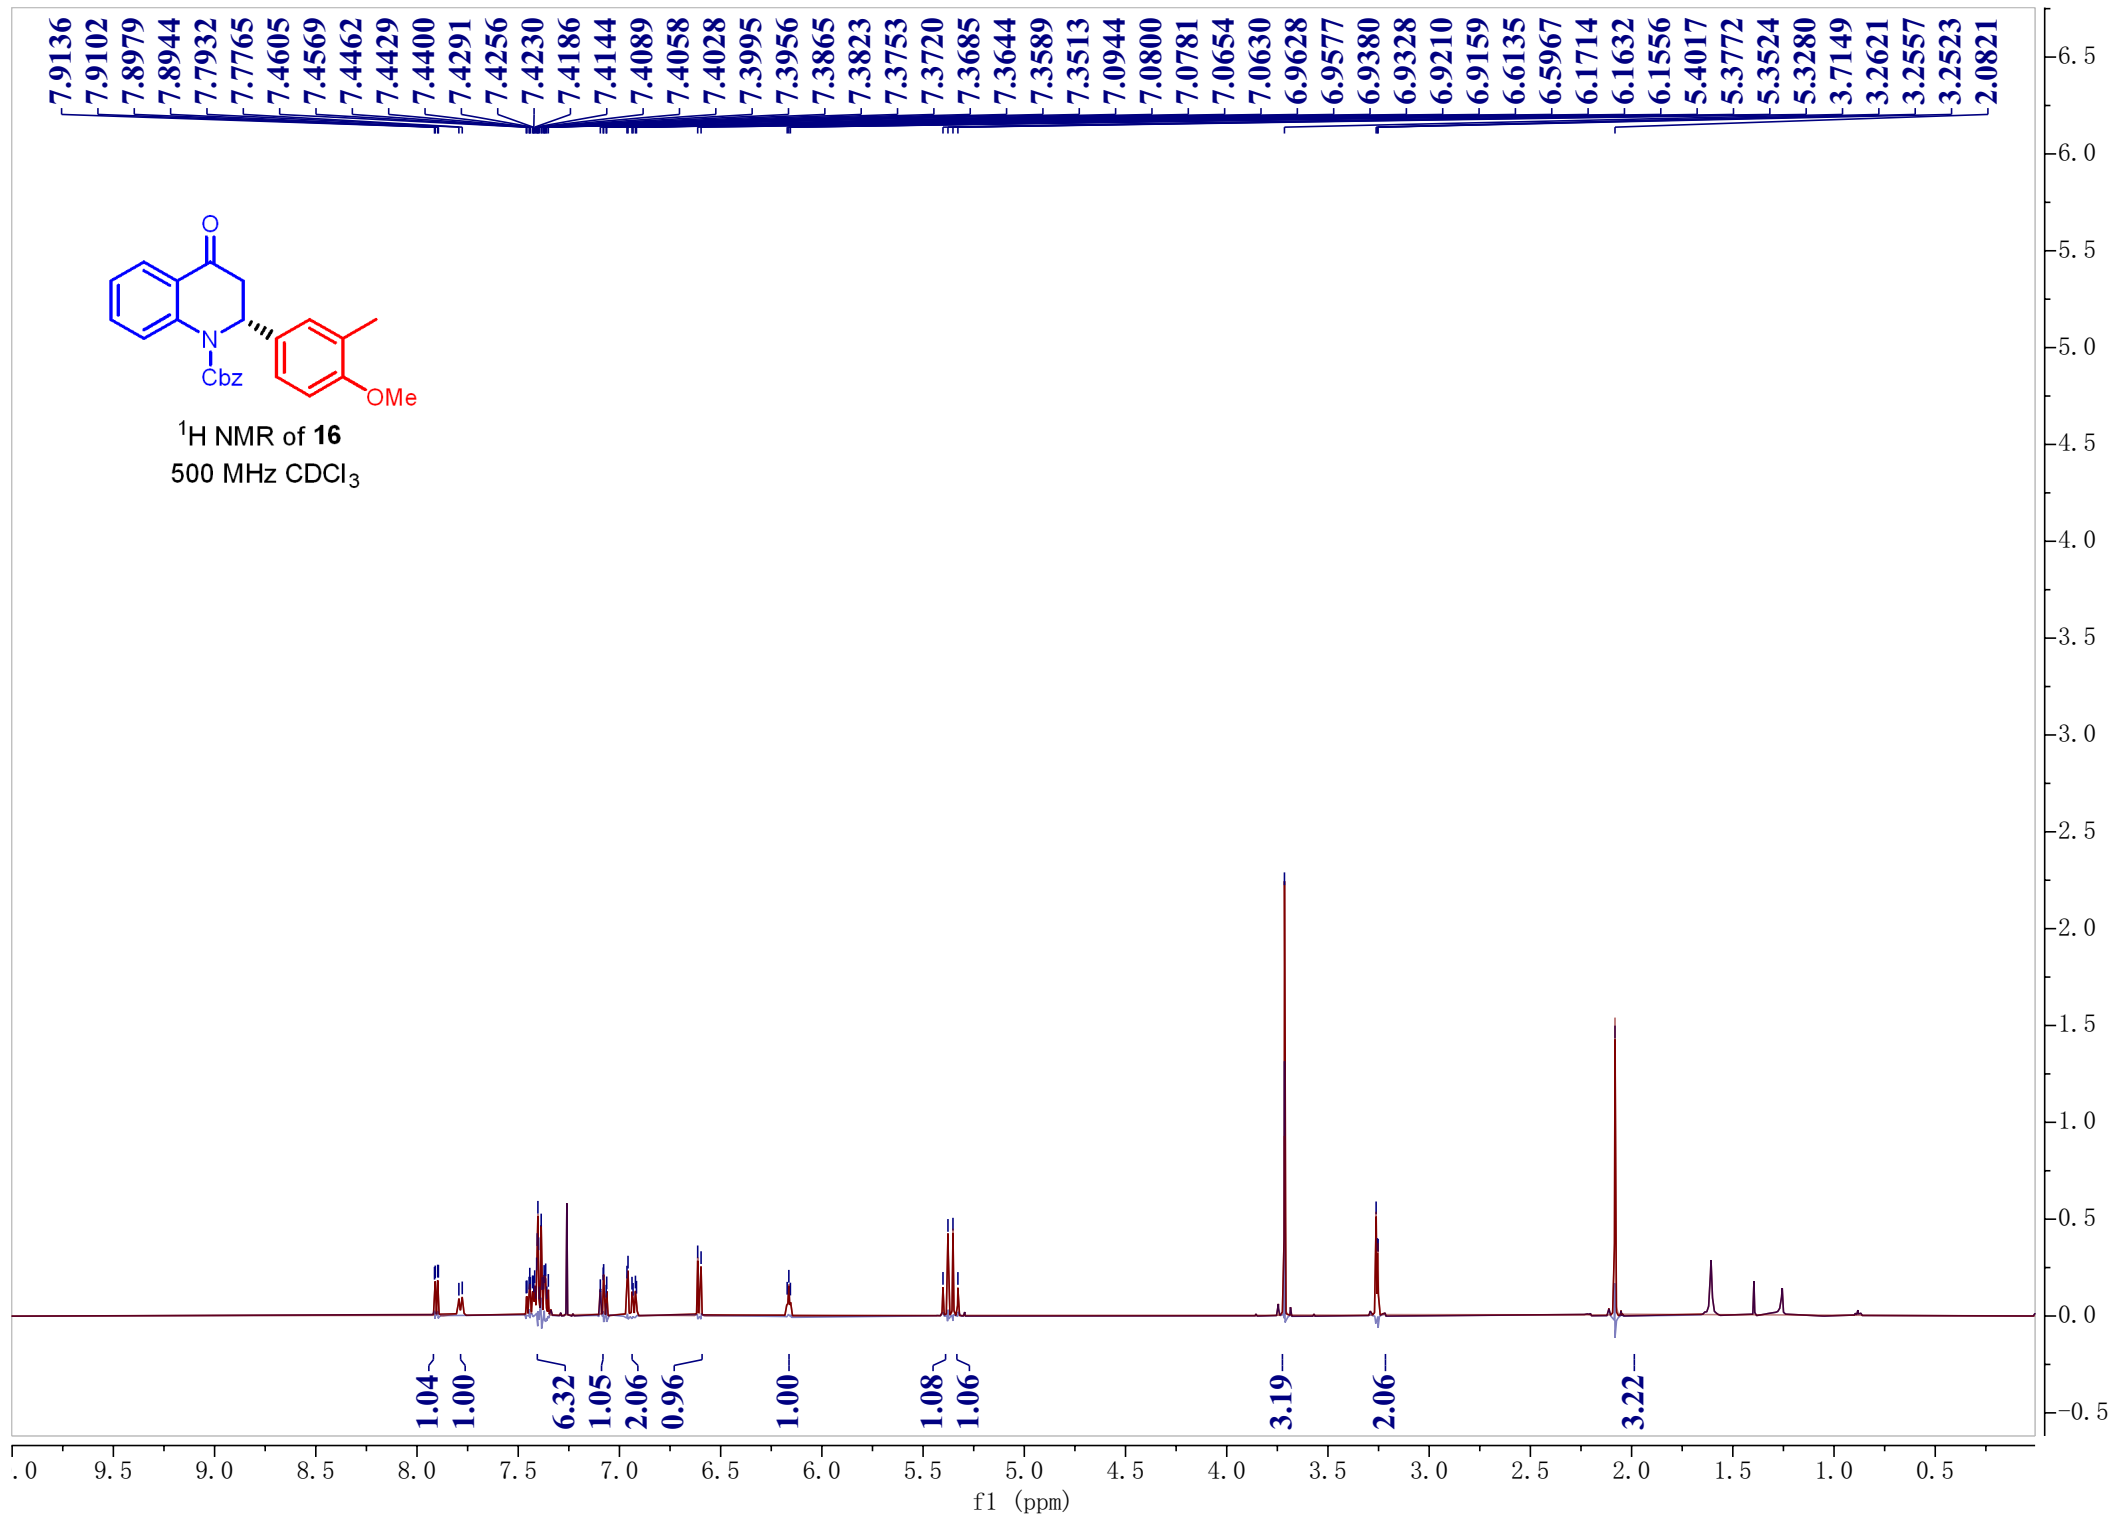

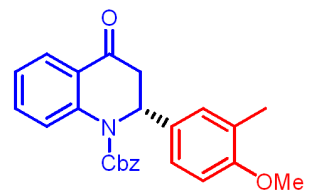

<sup>13</sup>C NMR of **16**  
126 MHz CDCl<sub>3</sub>

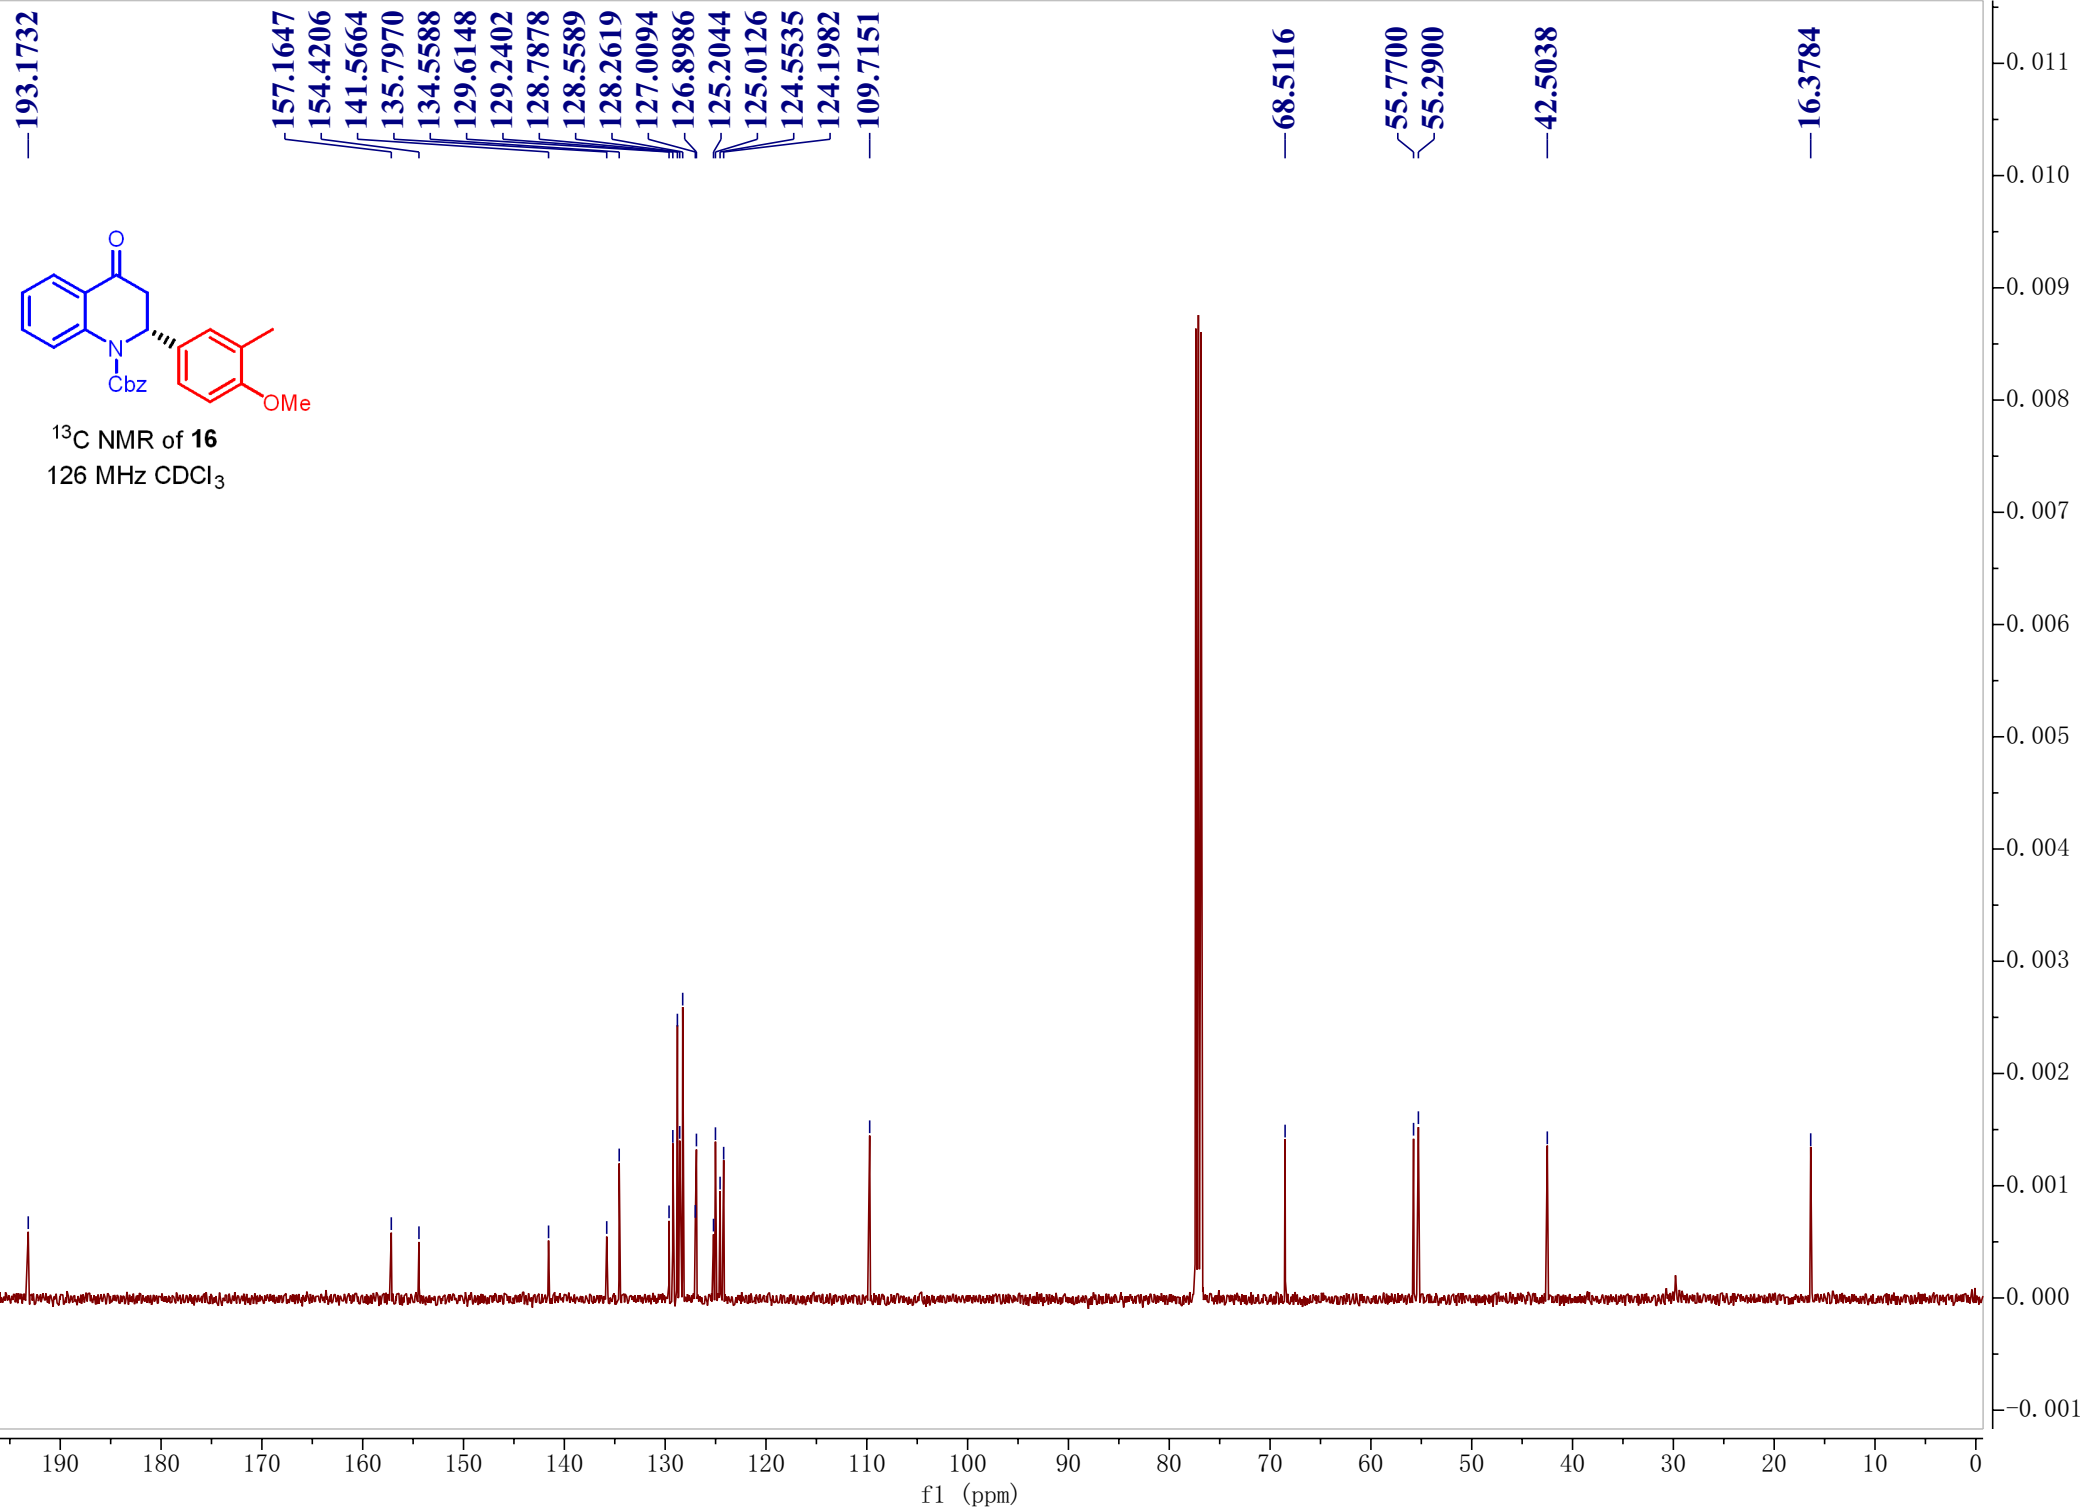

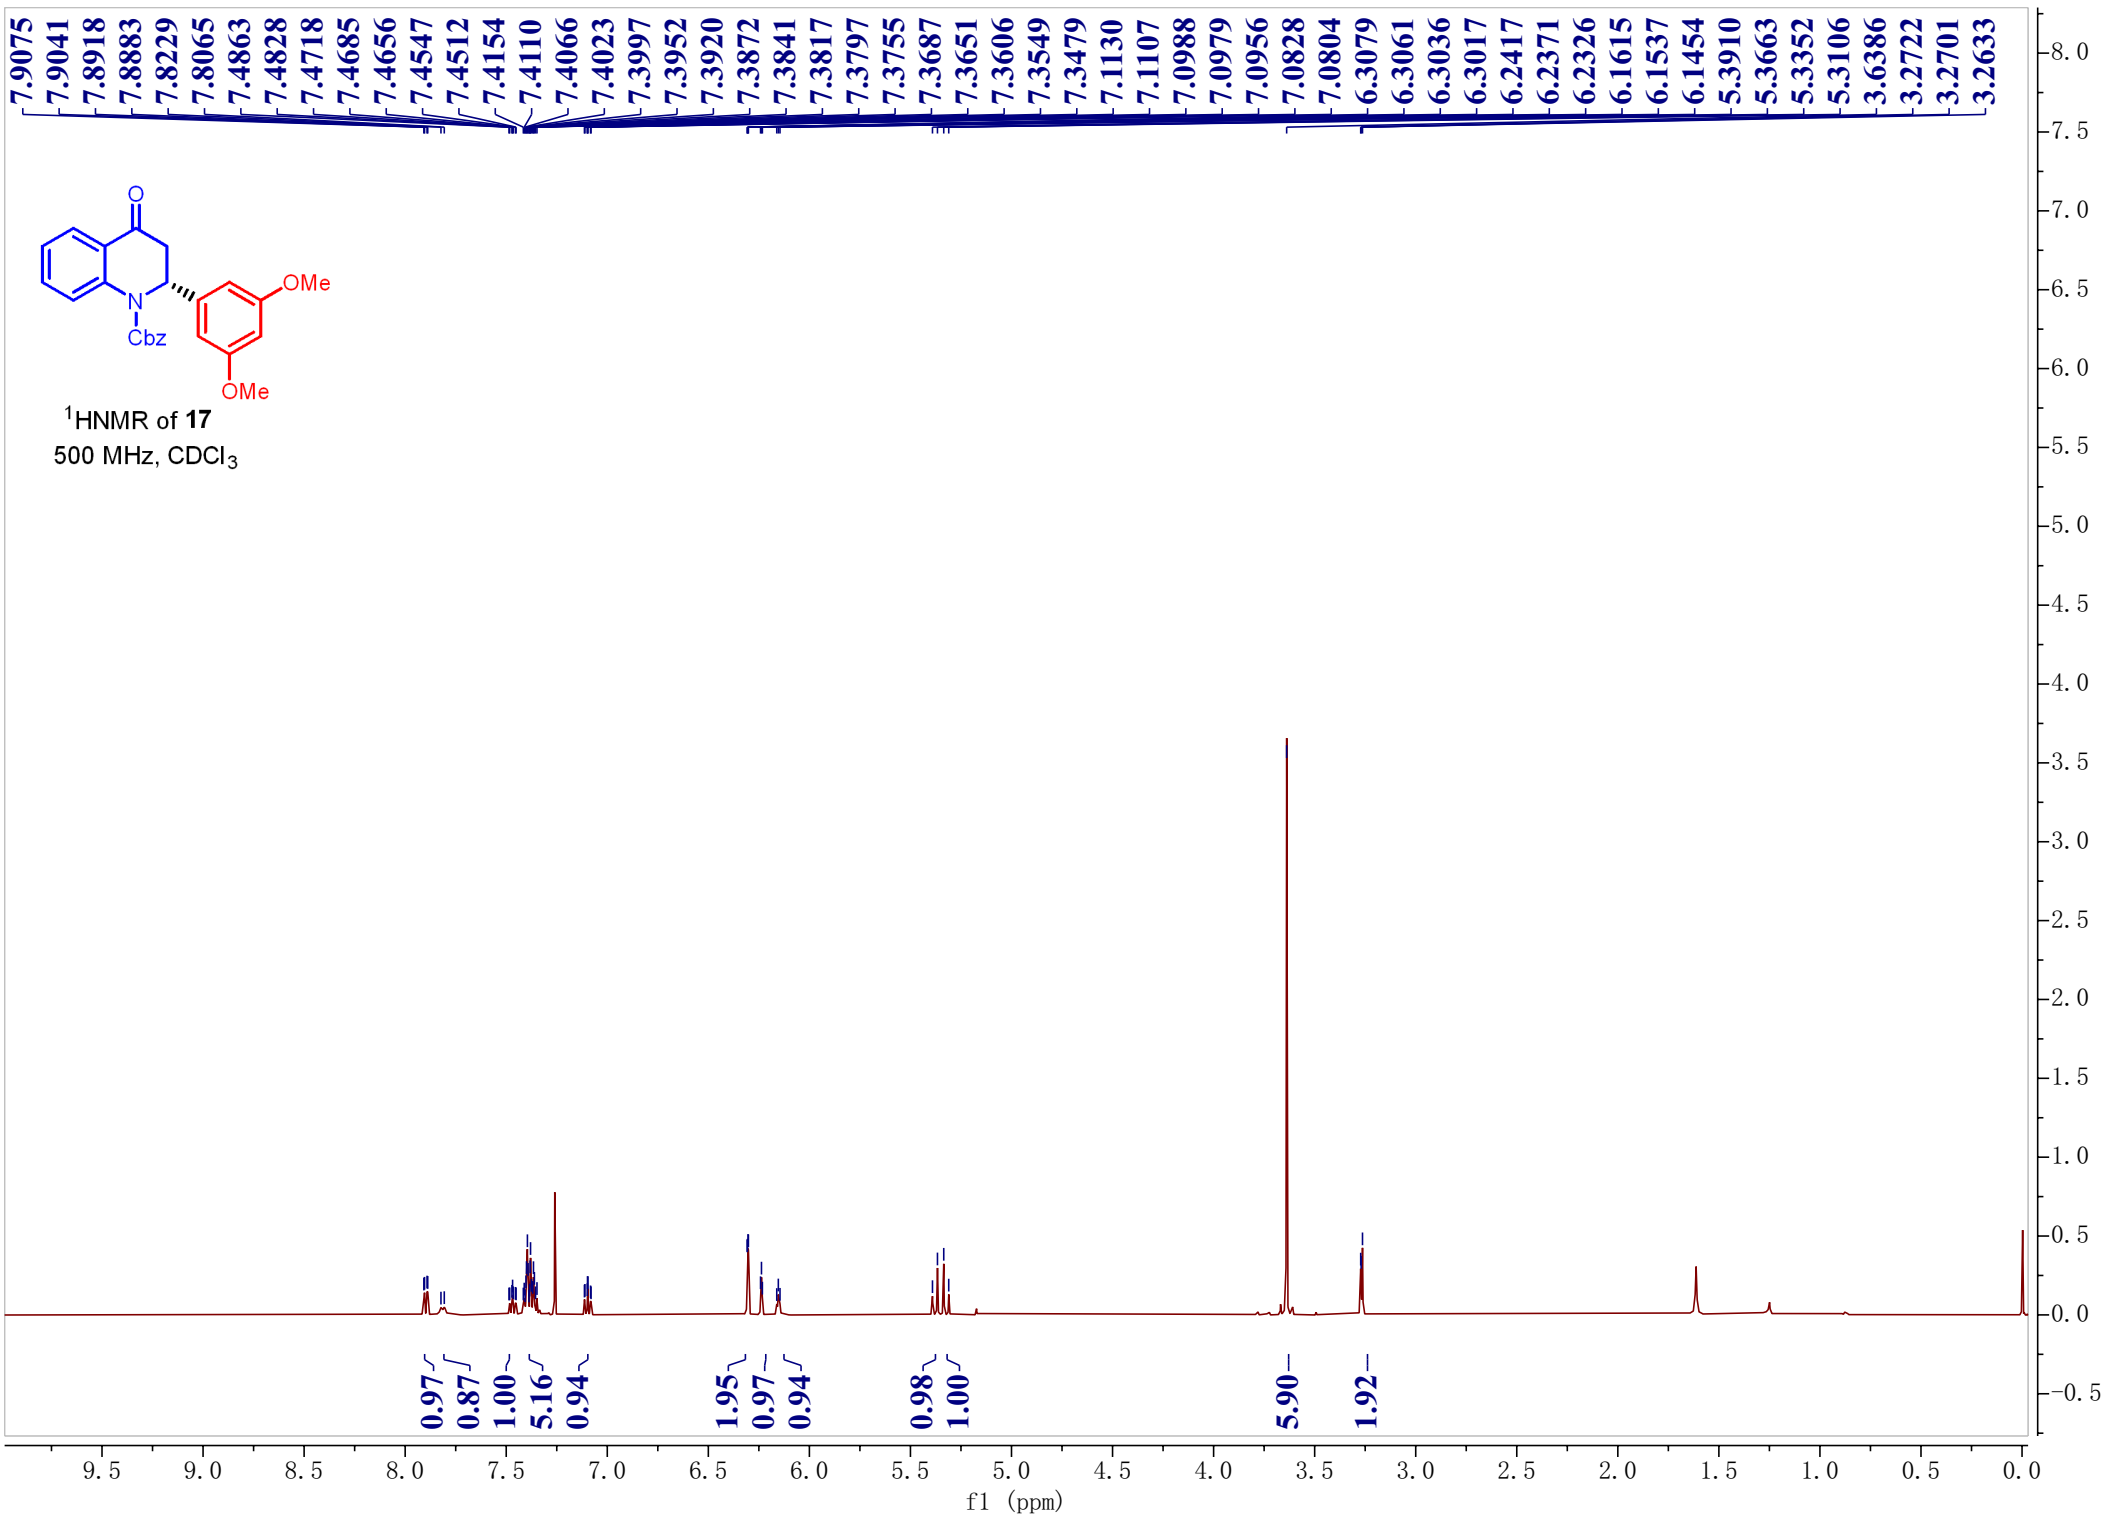

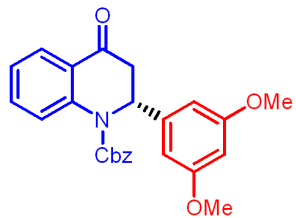

<sup>13</sup>HNMR of 17  
126 MHz, CDCl<sub>3</sub>

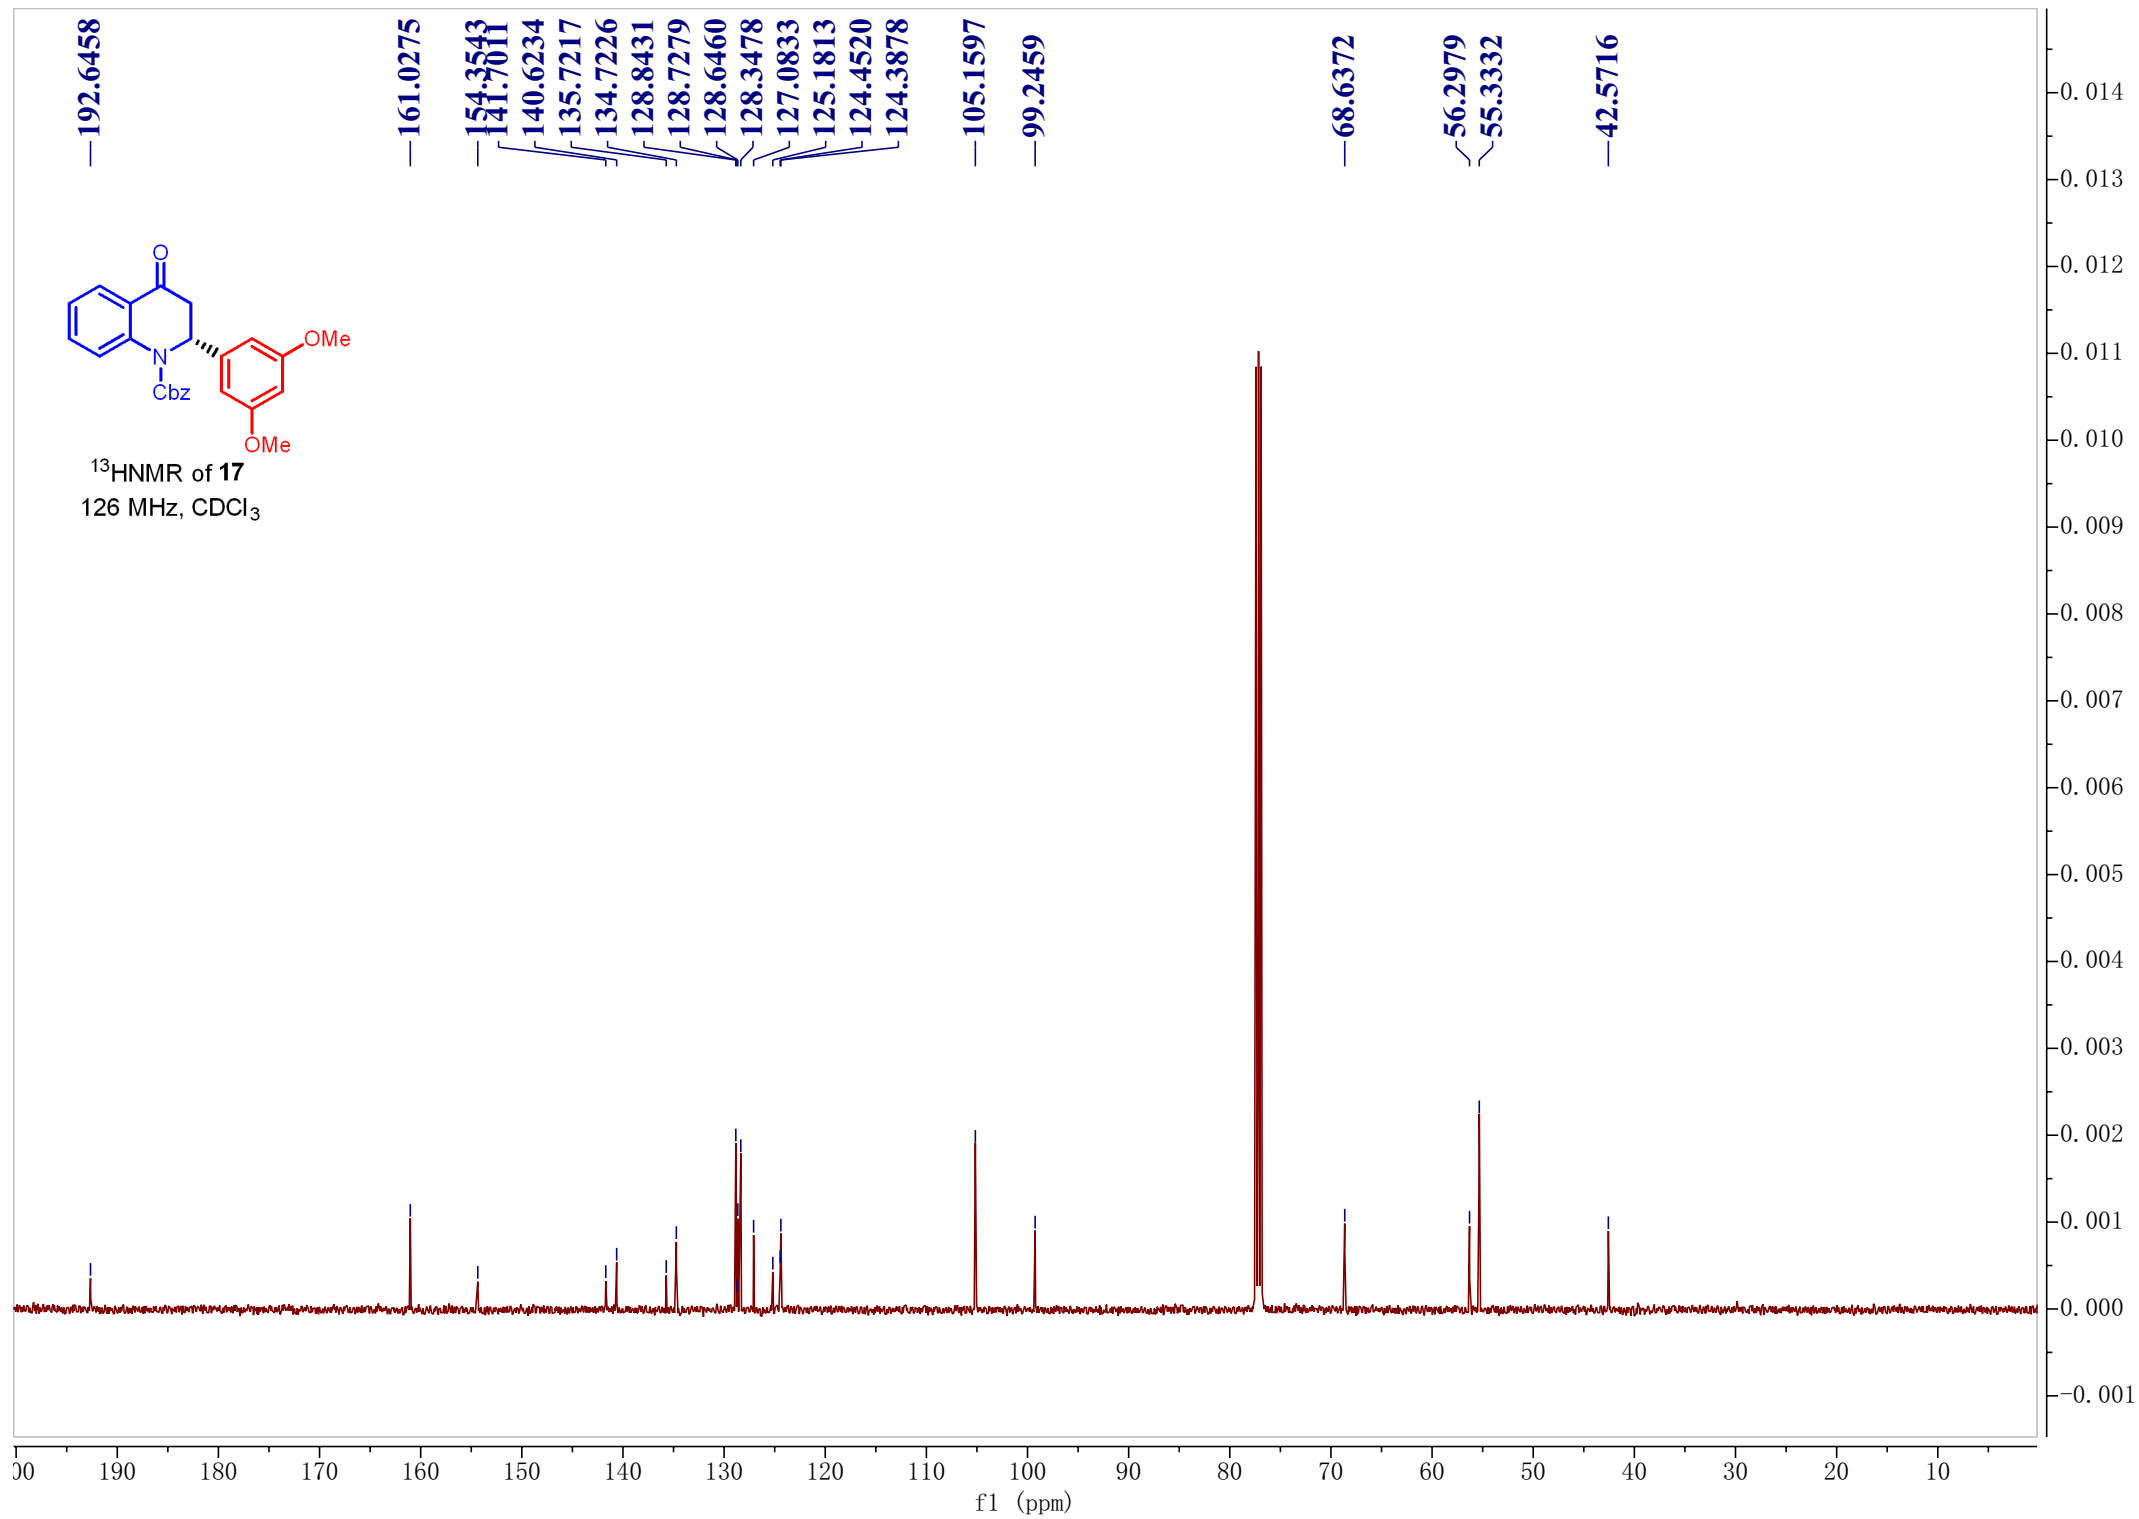



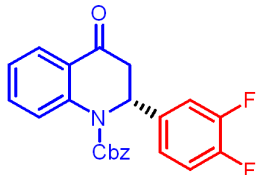

<sup>1</sup>H NMR of 18  
400 MHz CDCl<sub>3</sub>

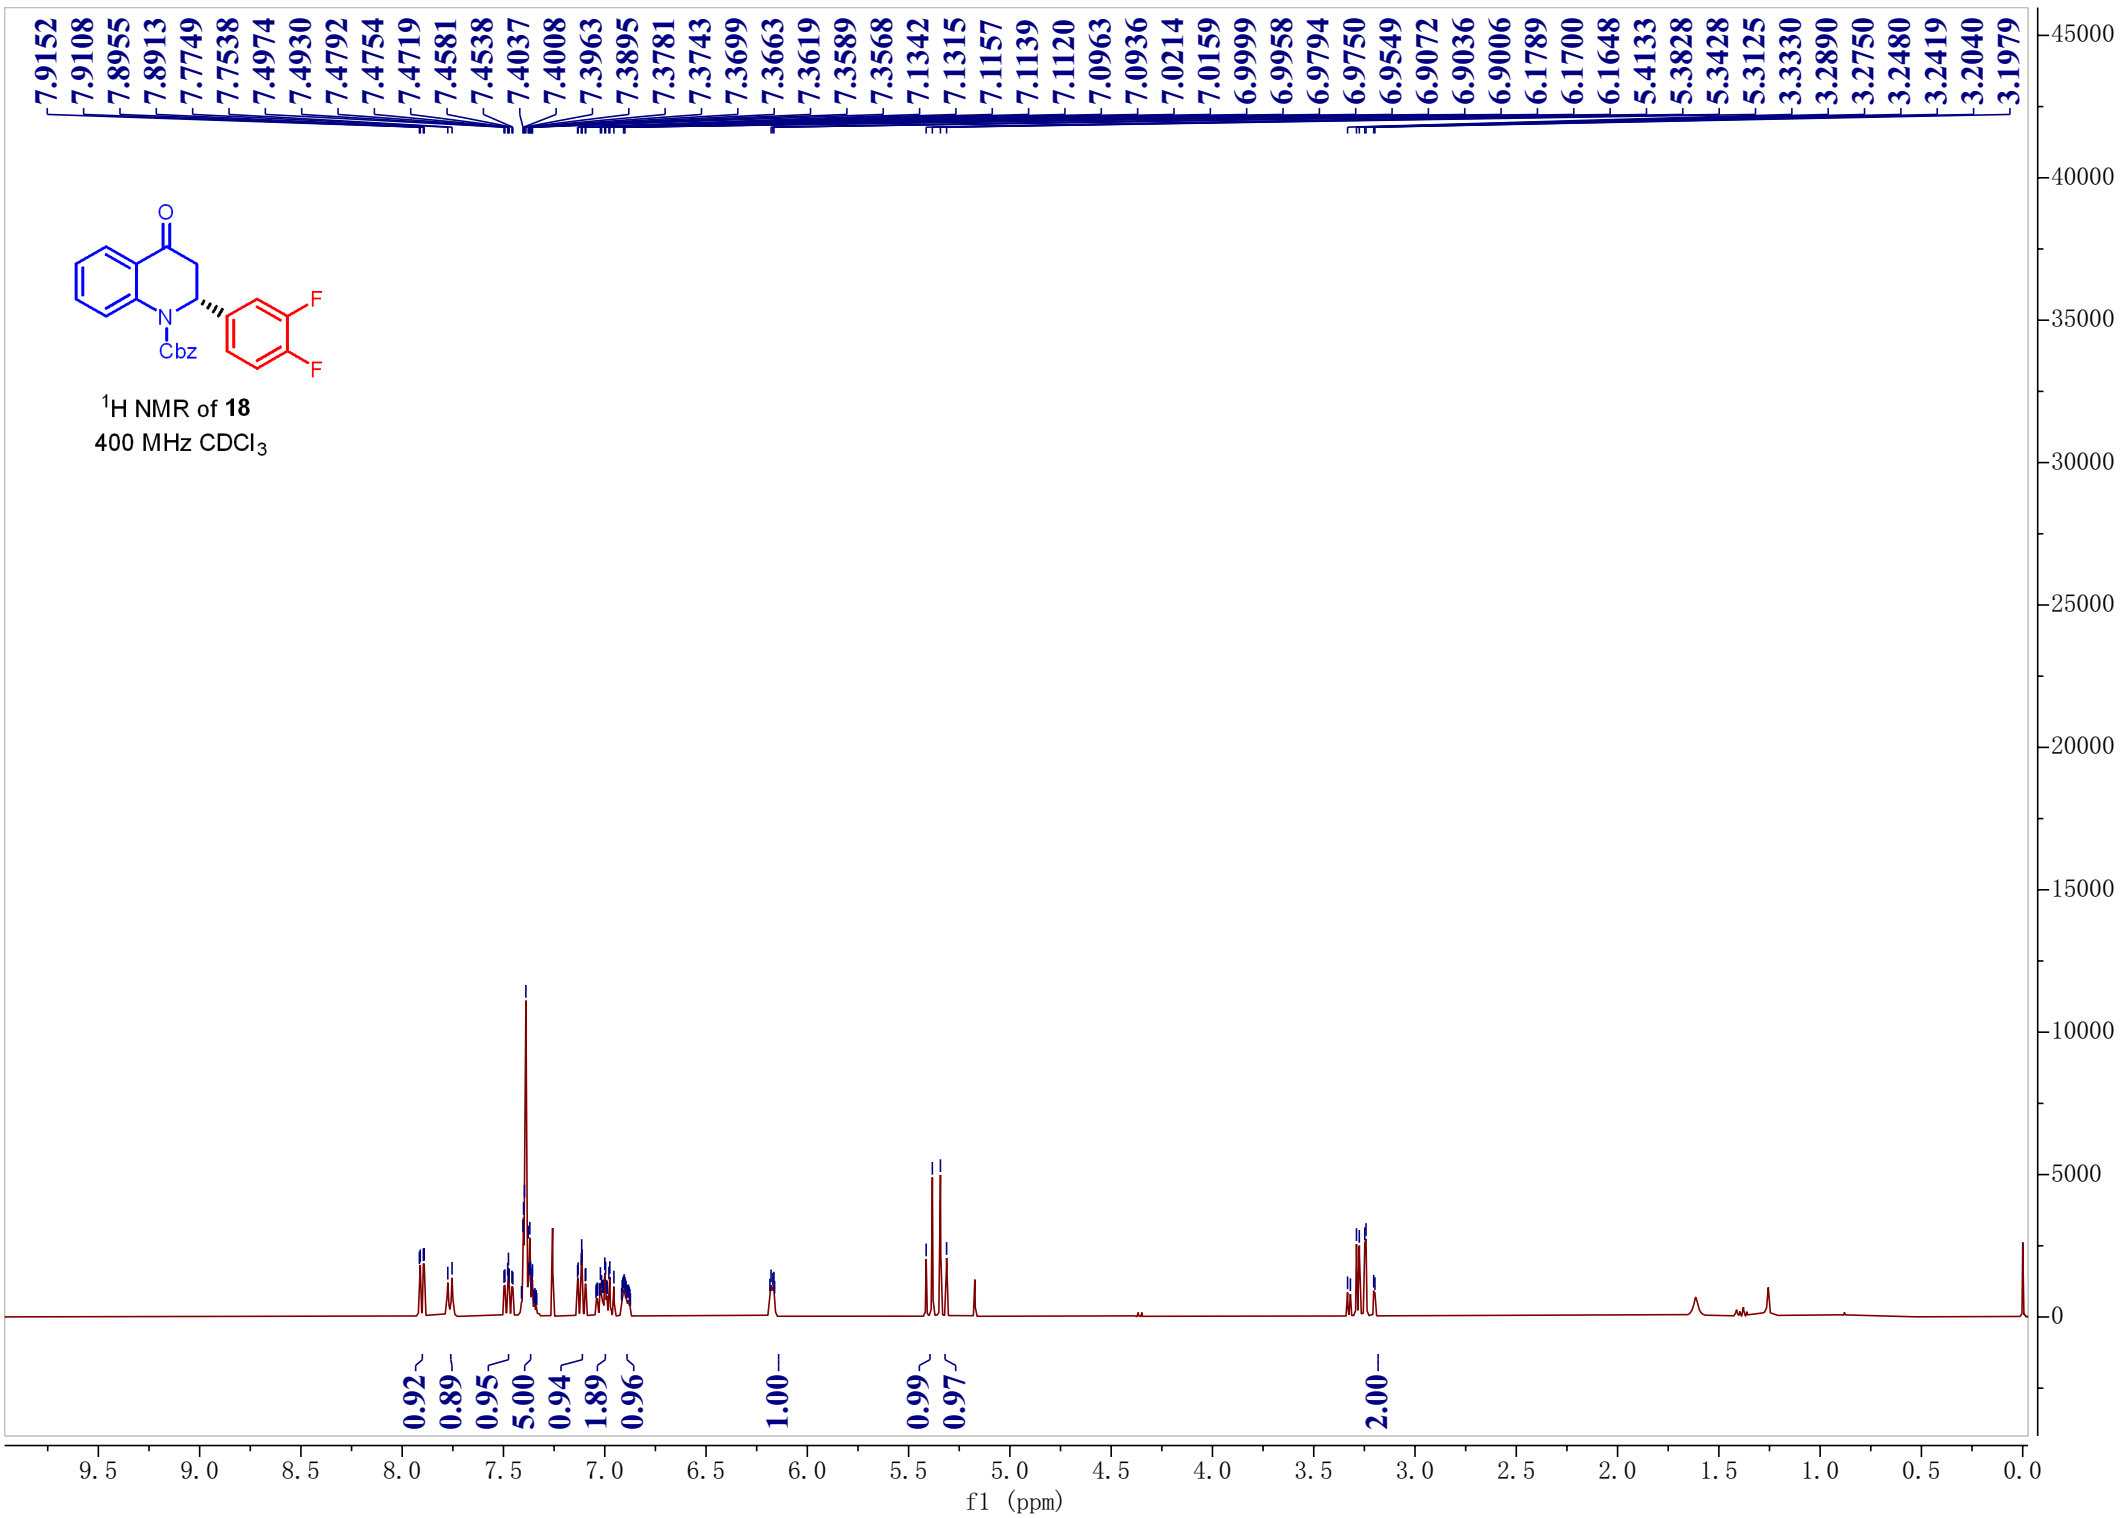

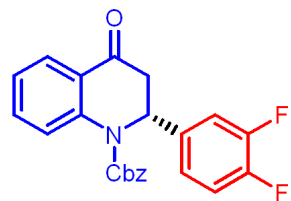

$^{13}\text{C}$  NMR of **18**  
101 MHz  $\text{CDCl}_3$

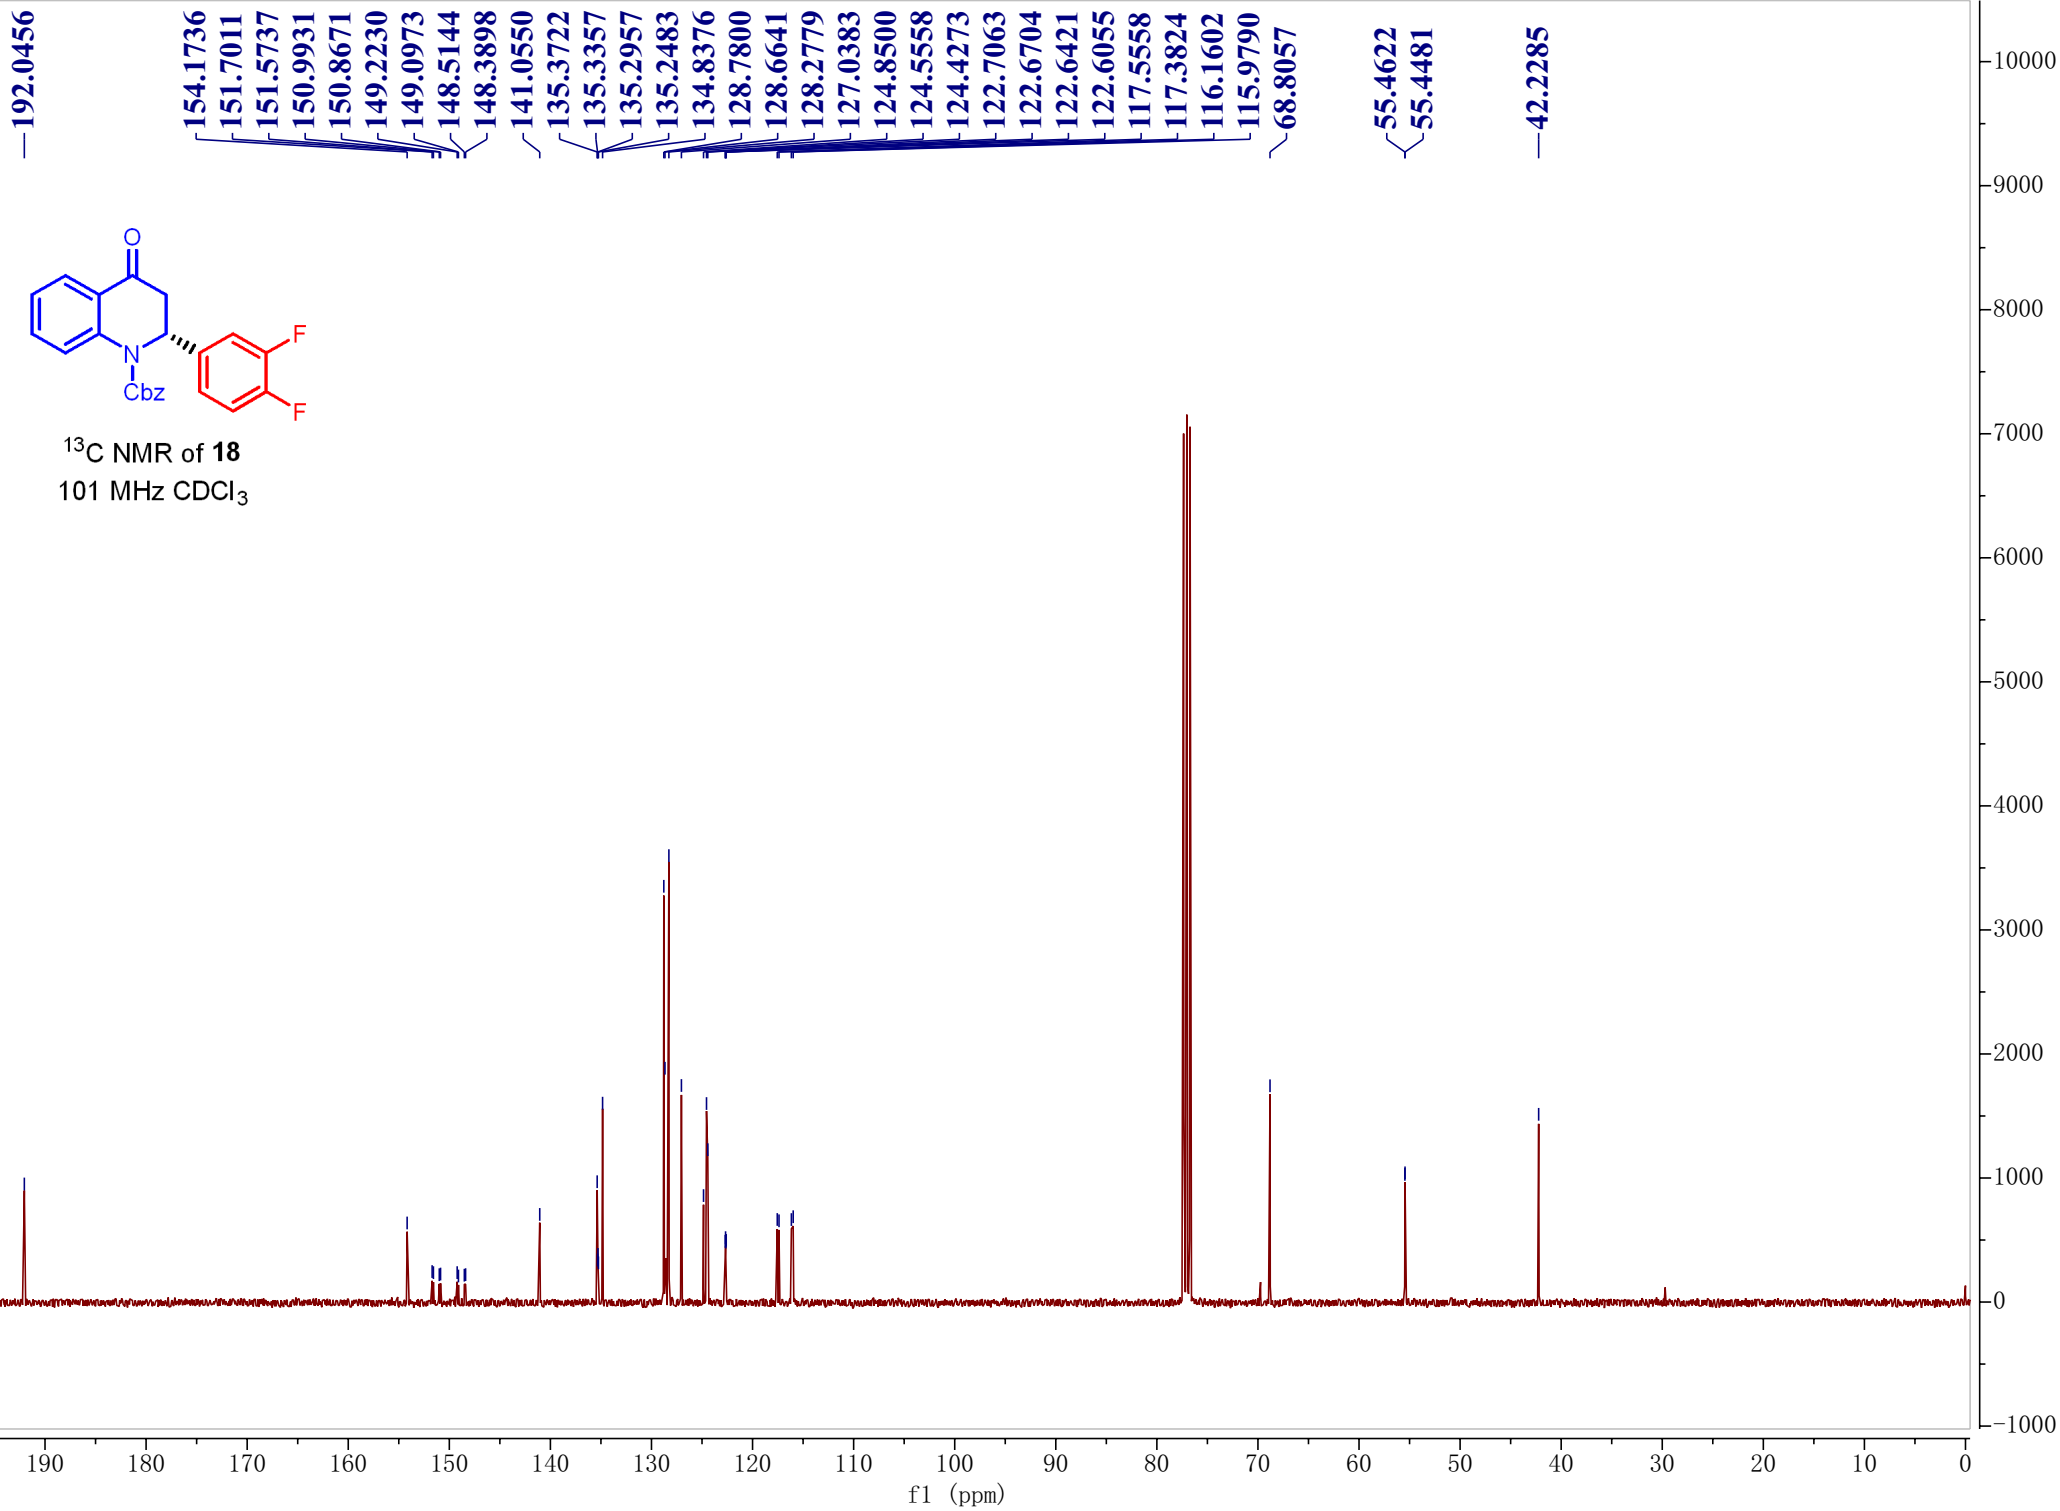

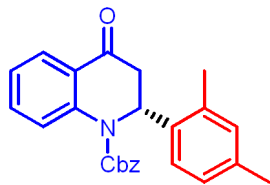

<sup>1</sup>H NMR of **19**  
500 MHz CDCl<sub>3</sub>

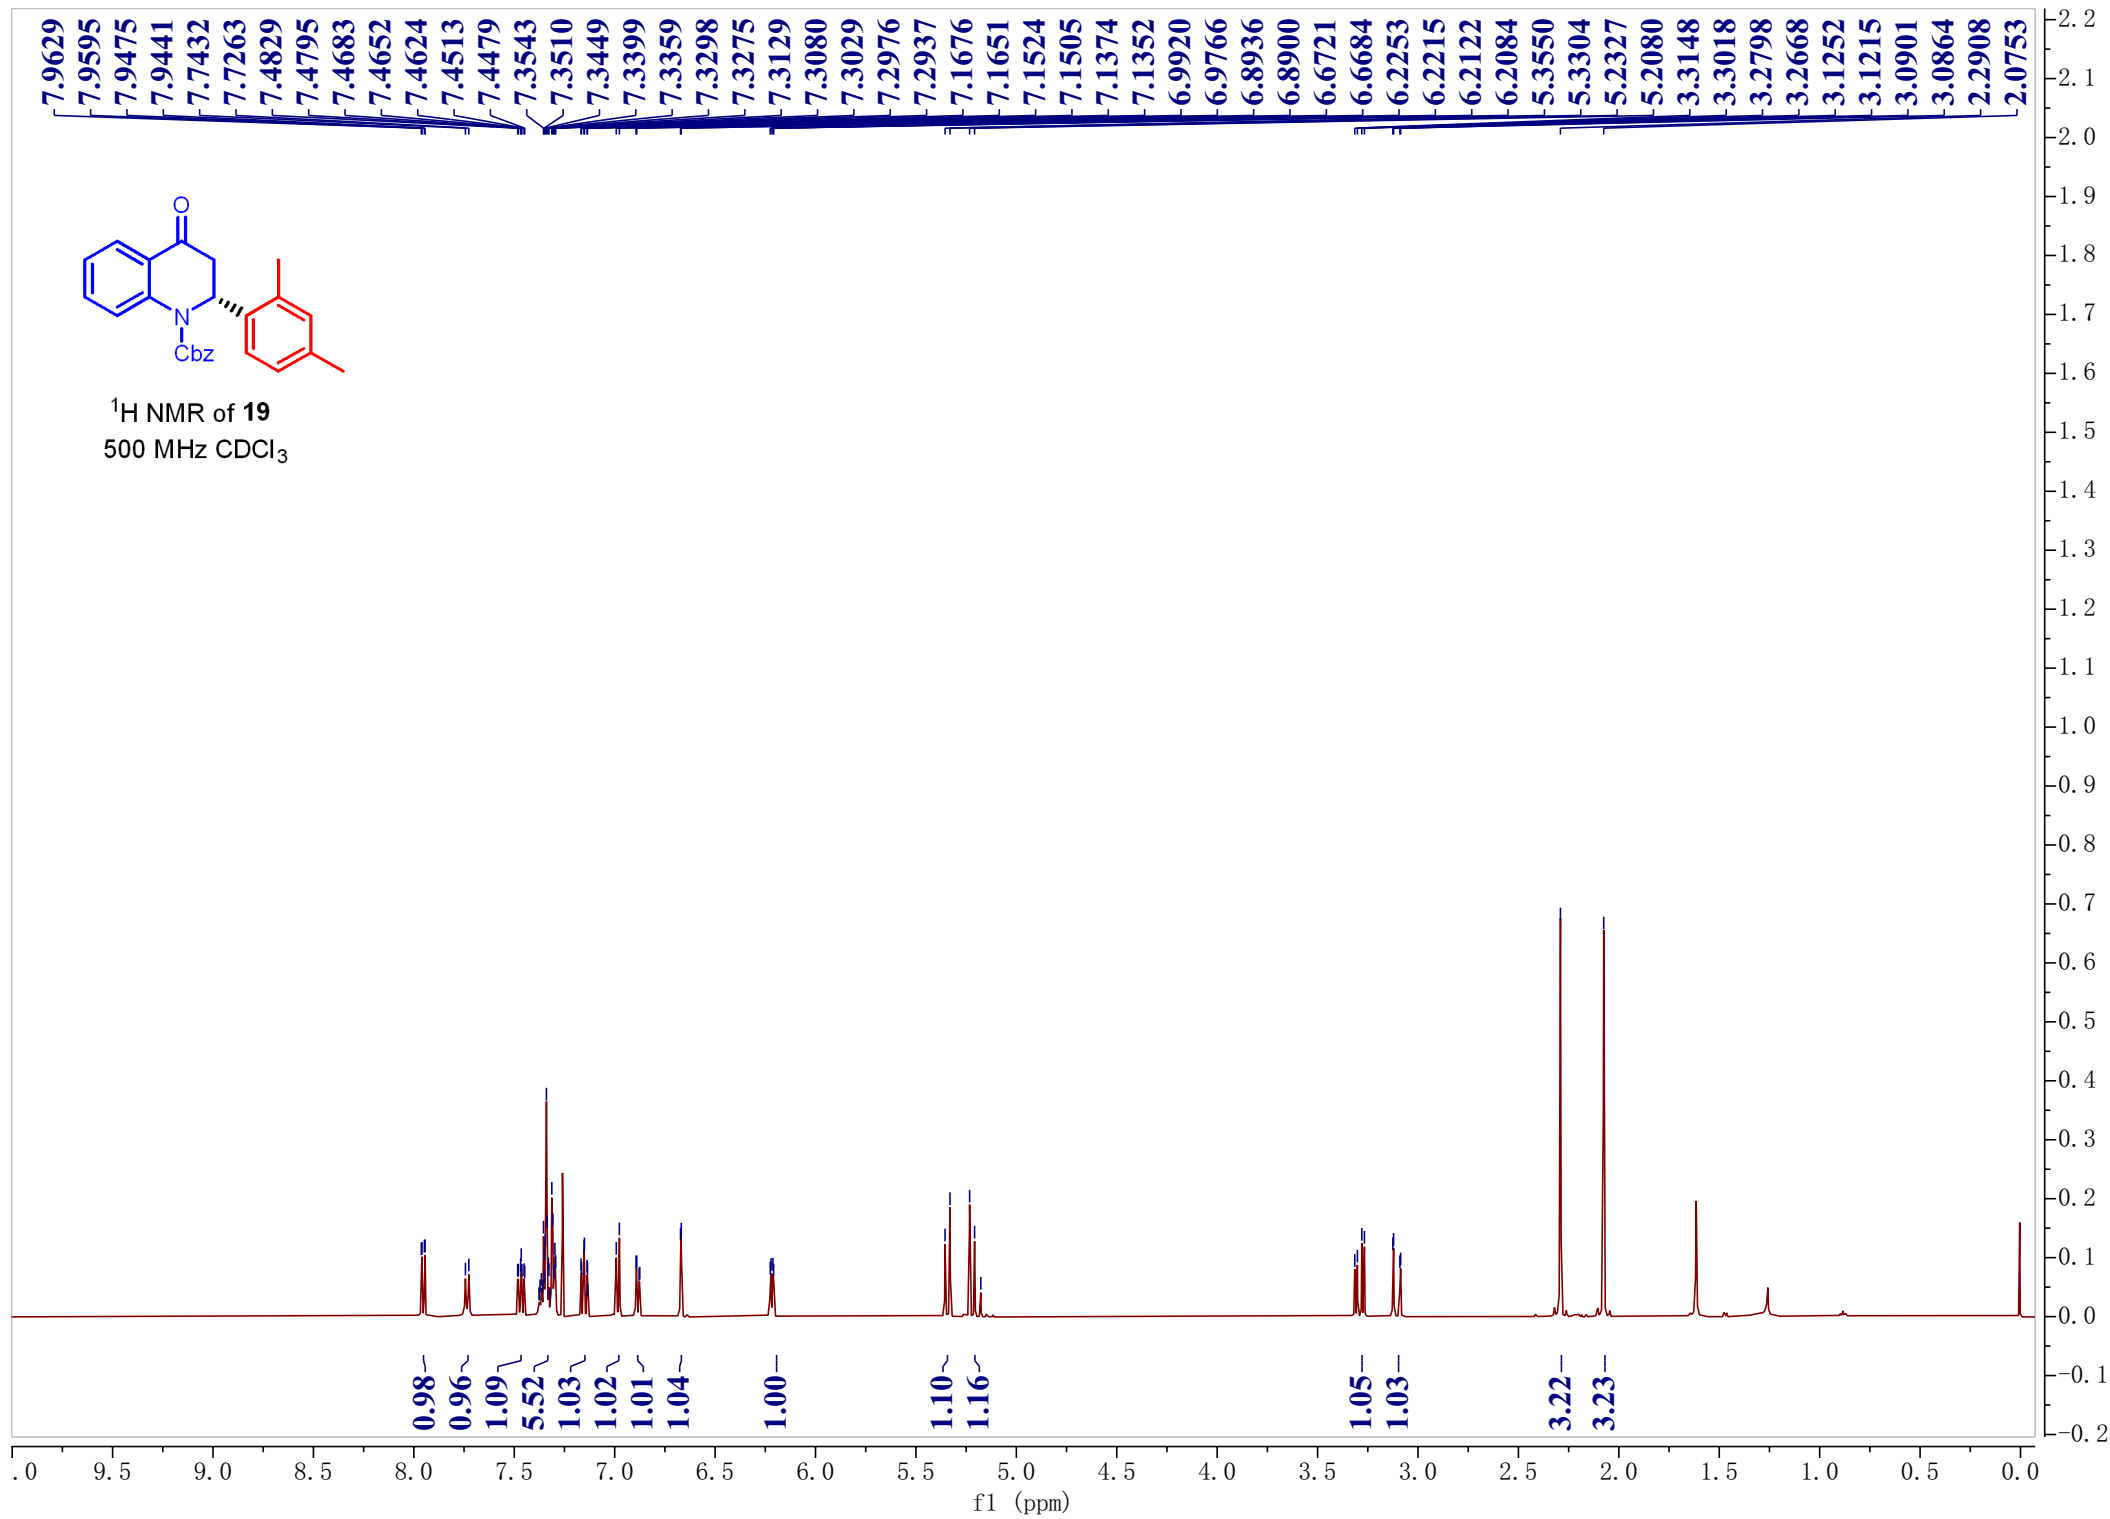

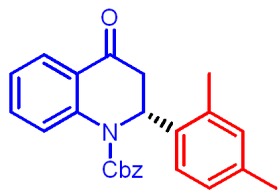

<sup>13</sup>C NMR of **19**  
126 MHz CDCl<sub>3</sub>

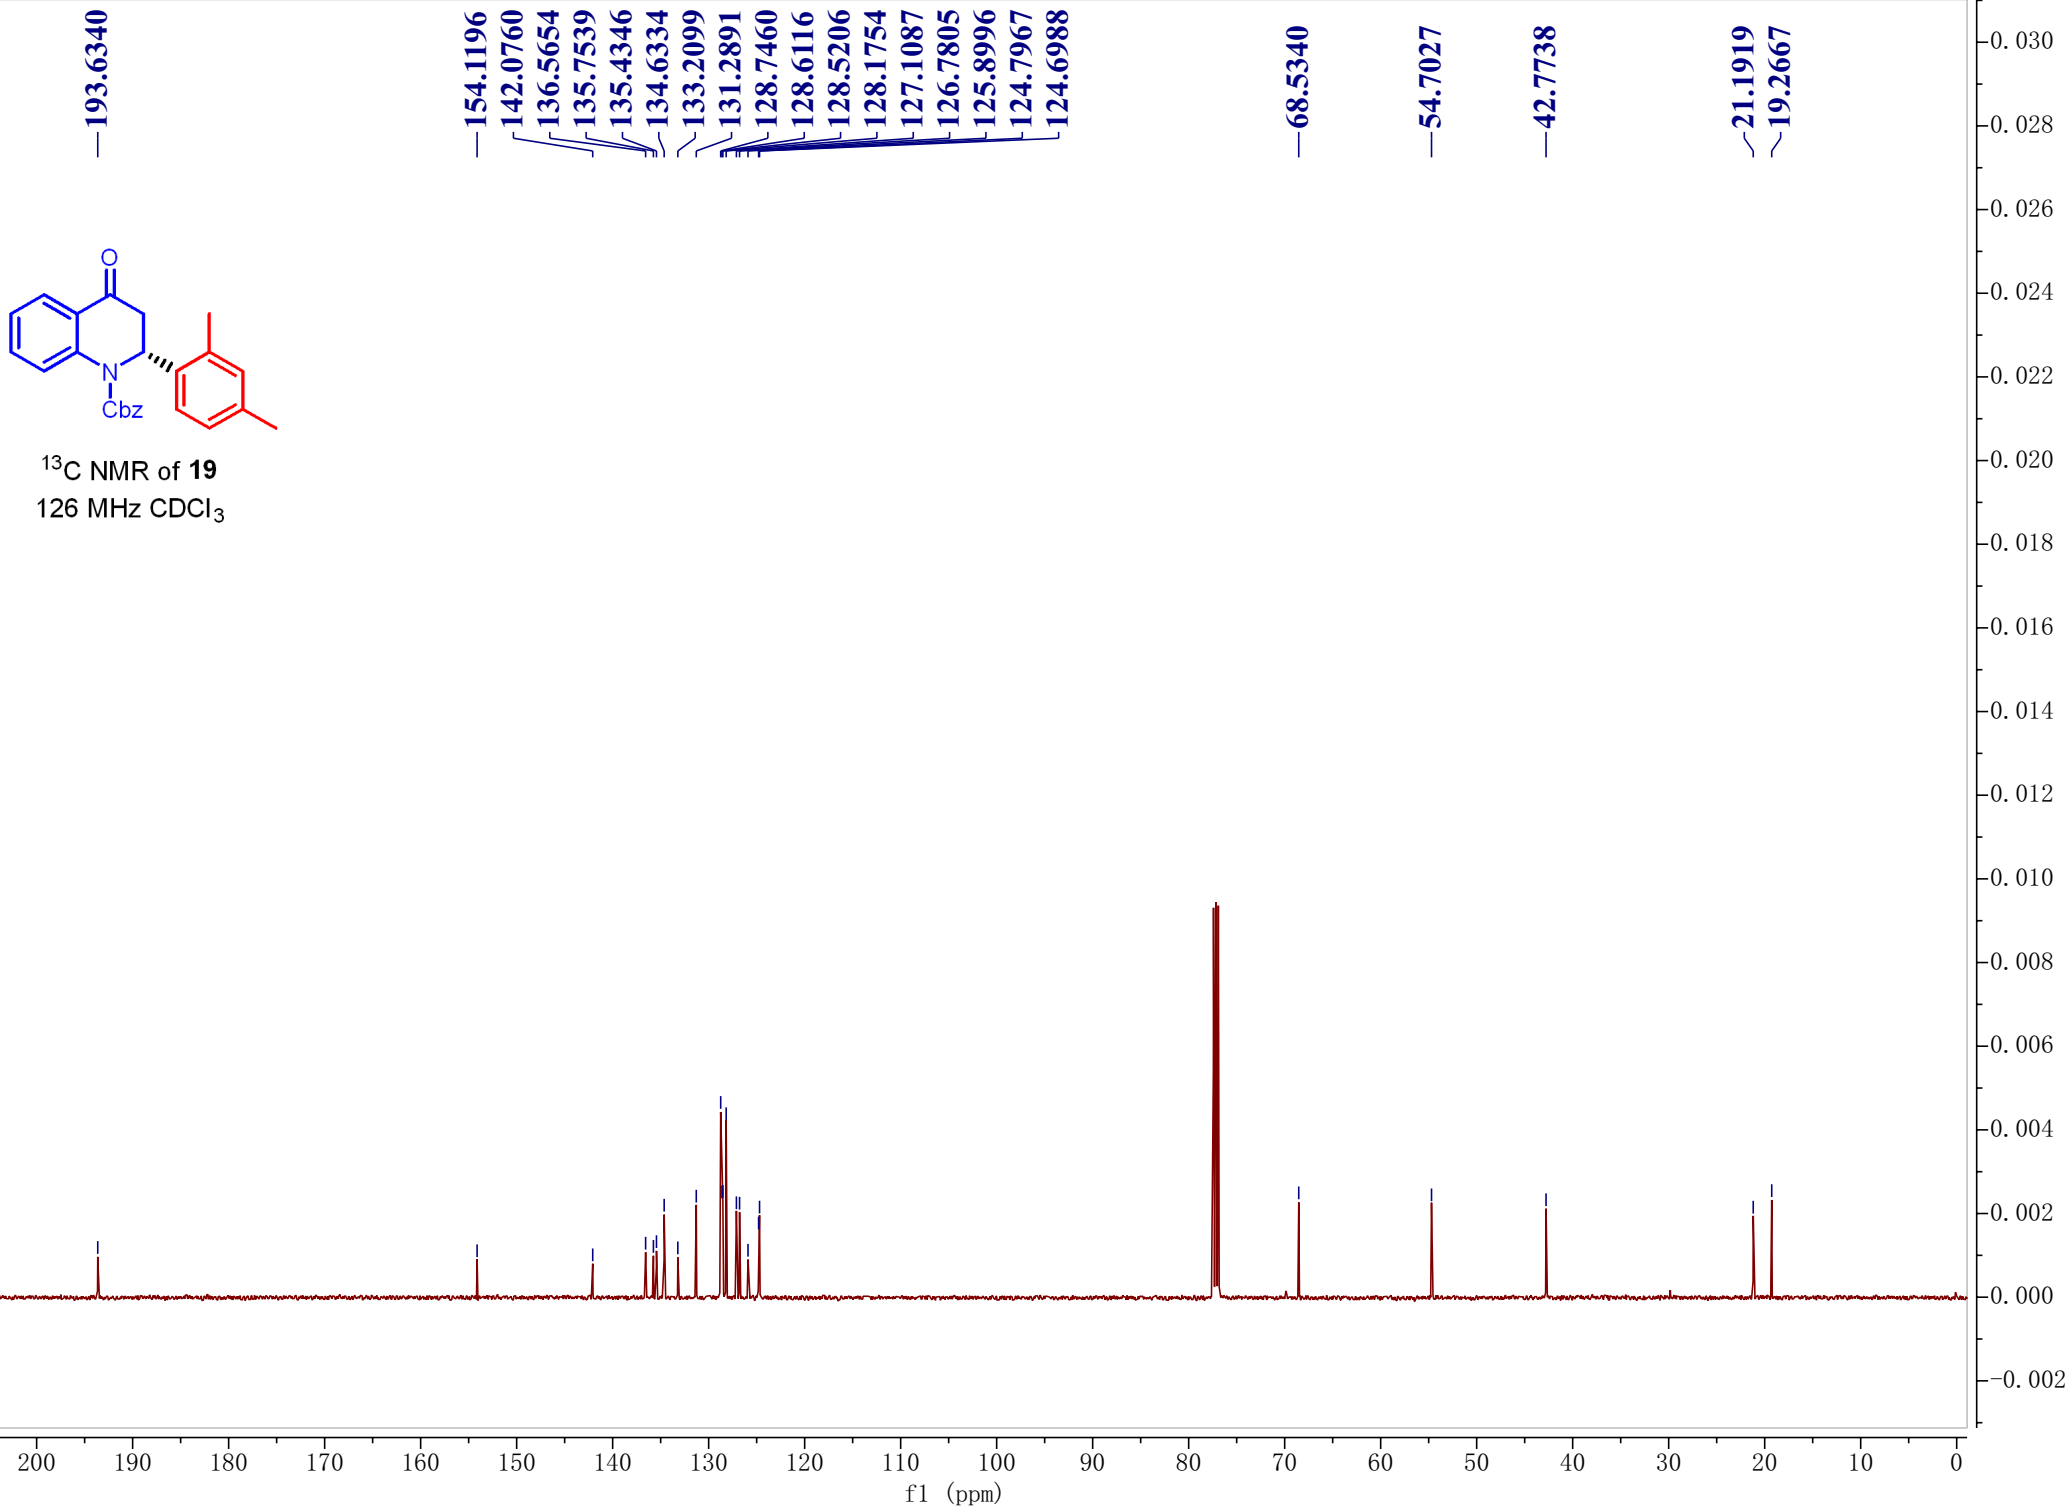

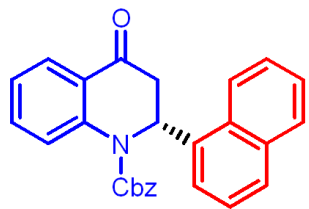

<sup>1</sup>H NMR of 20  
500 MHz CDCl<sub>3</sub>

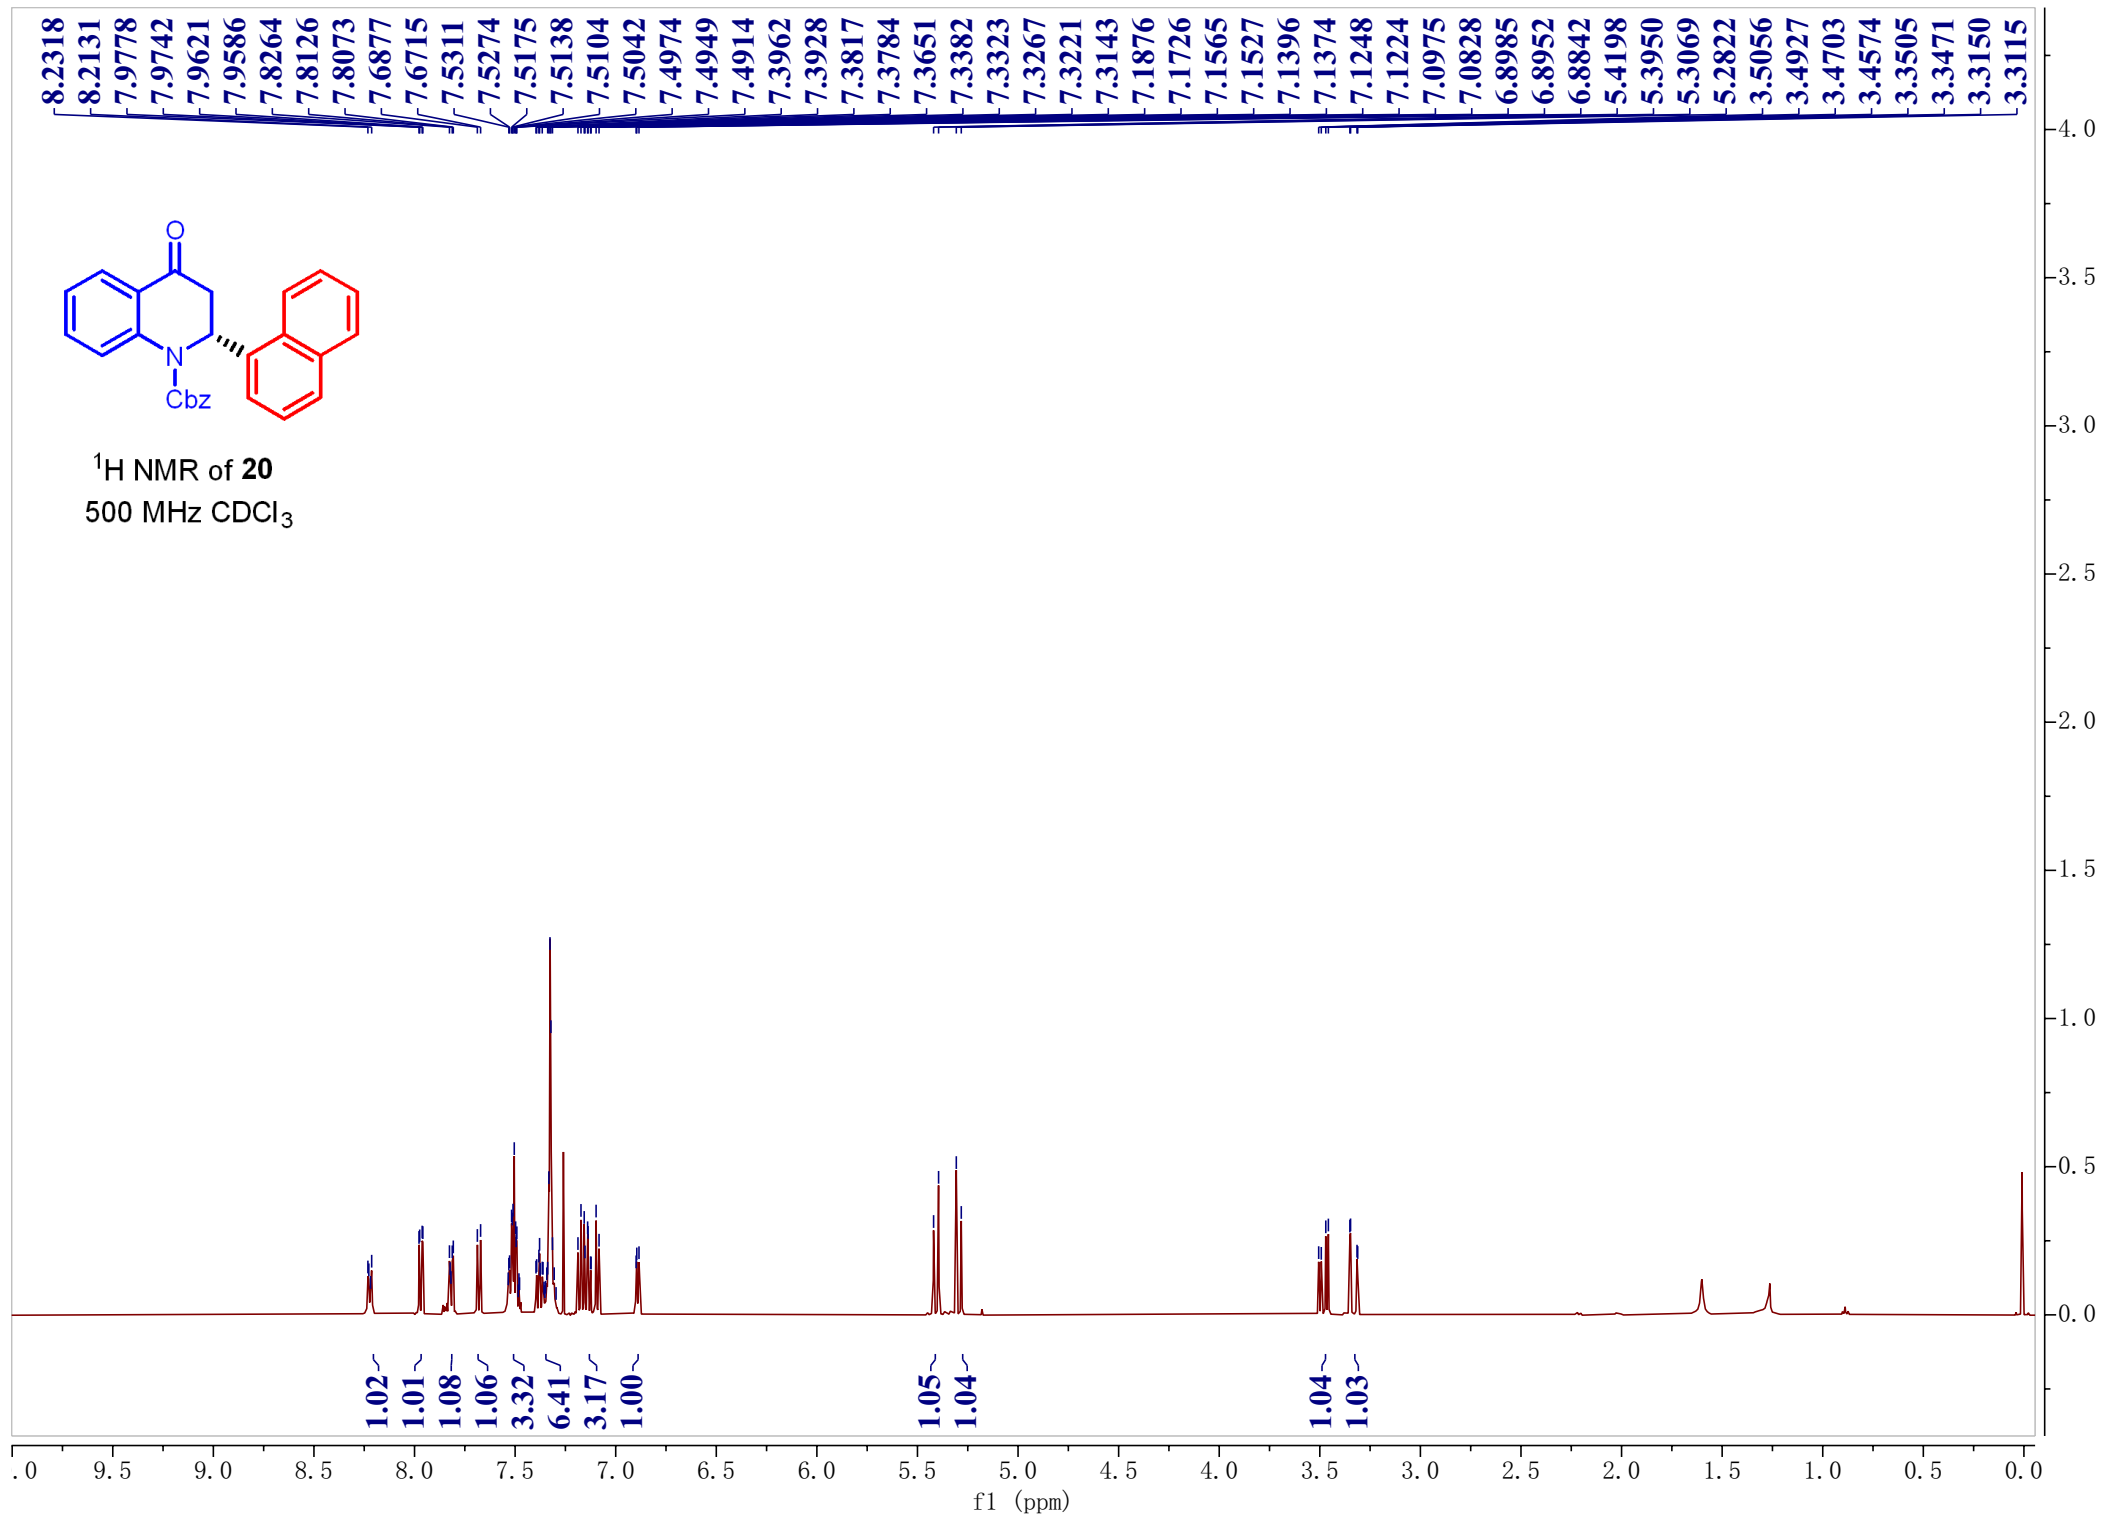

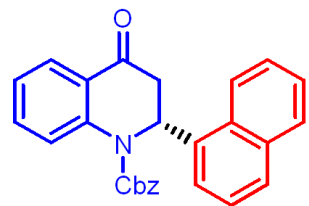

$^{13}\text{C}$  NMR of **20**  
126 MHz  $\text{CDCl}_3$

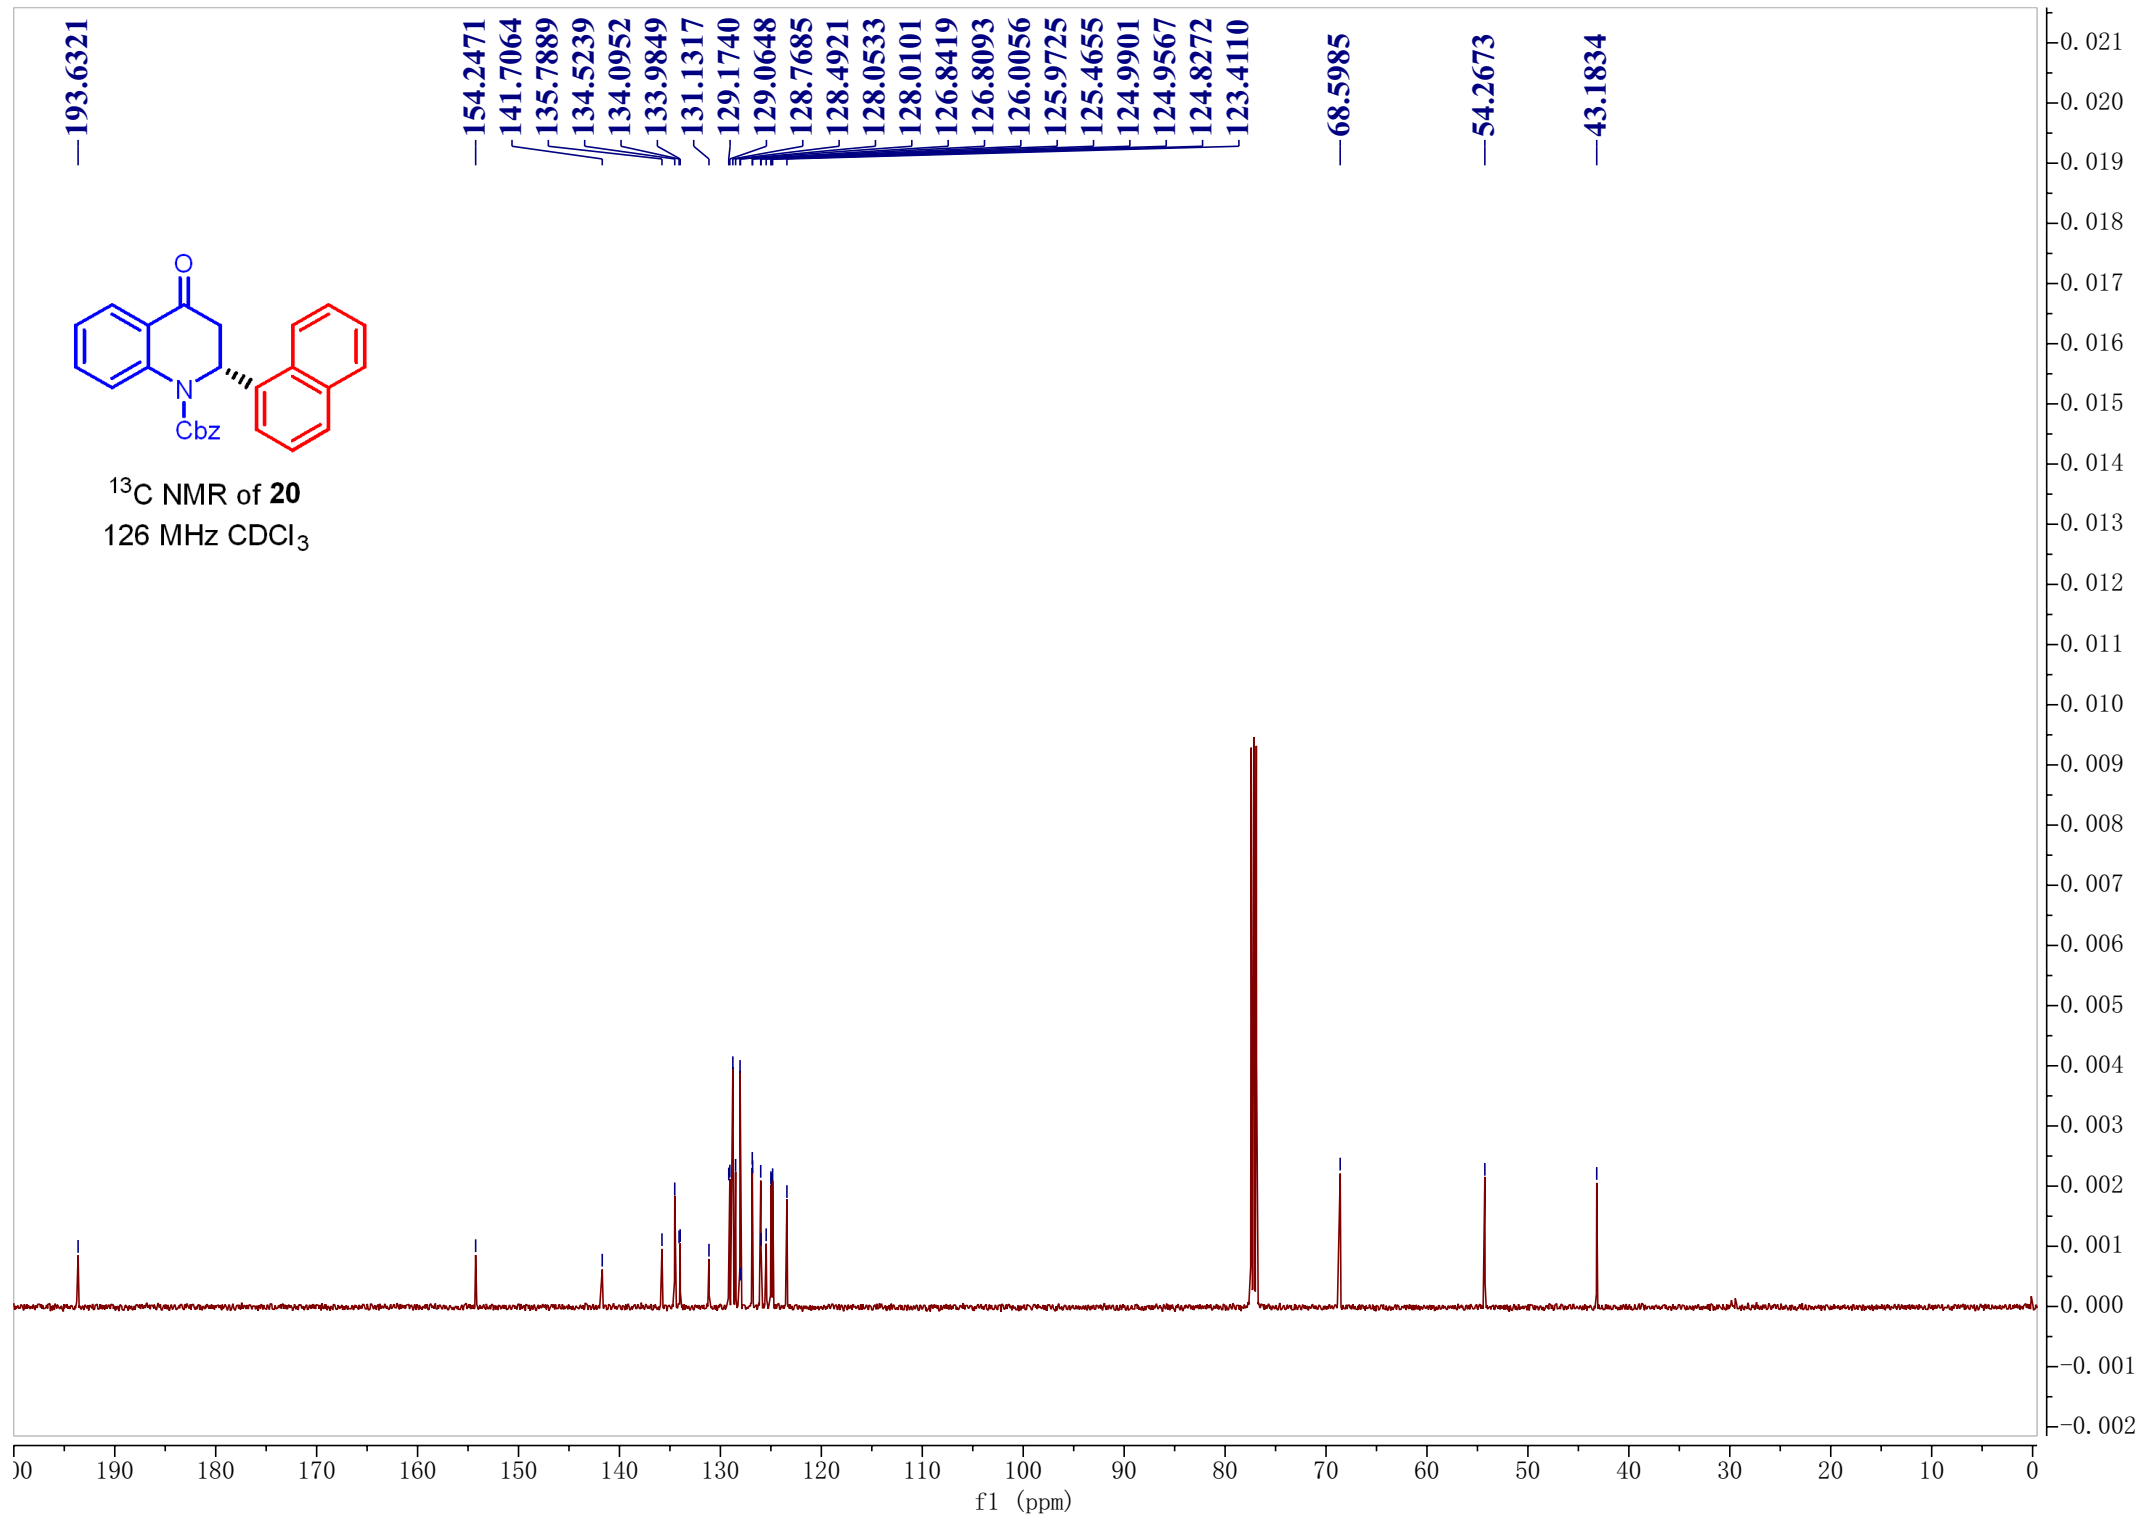

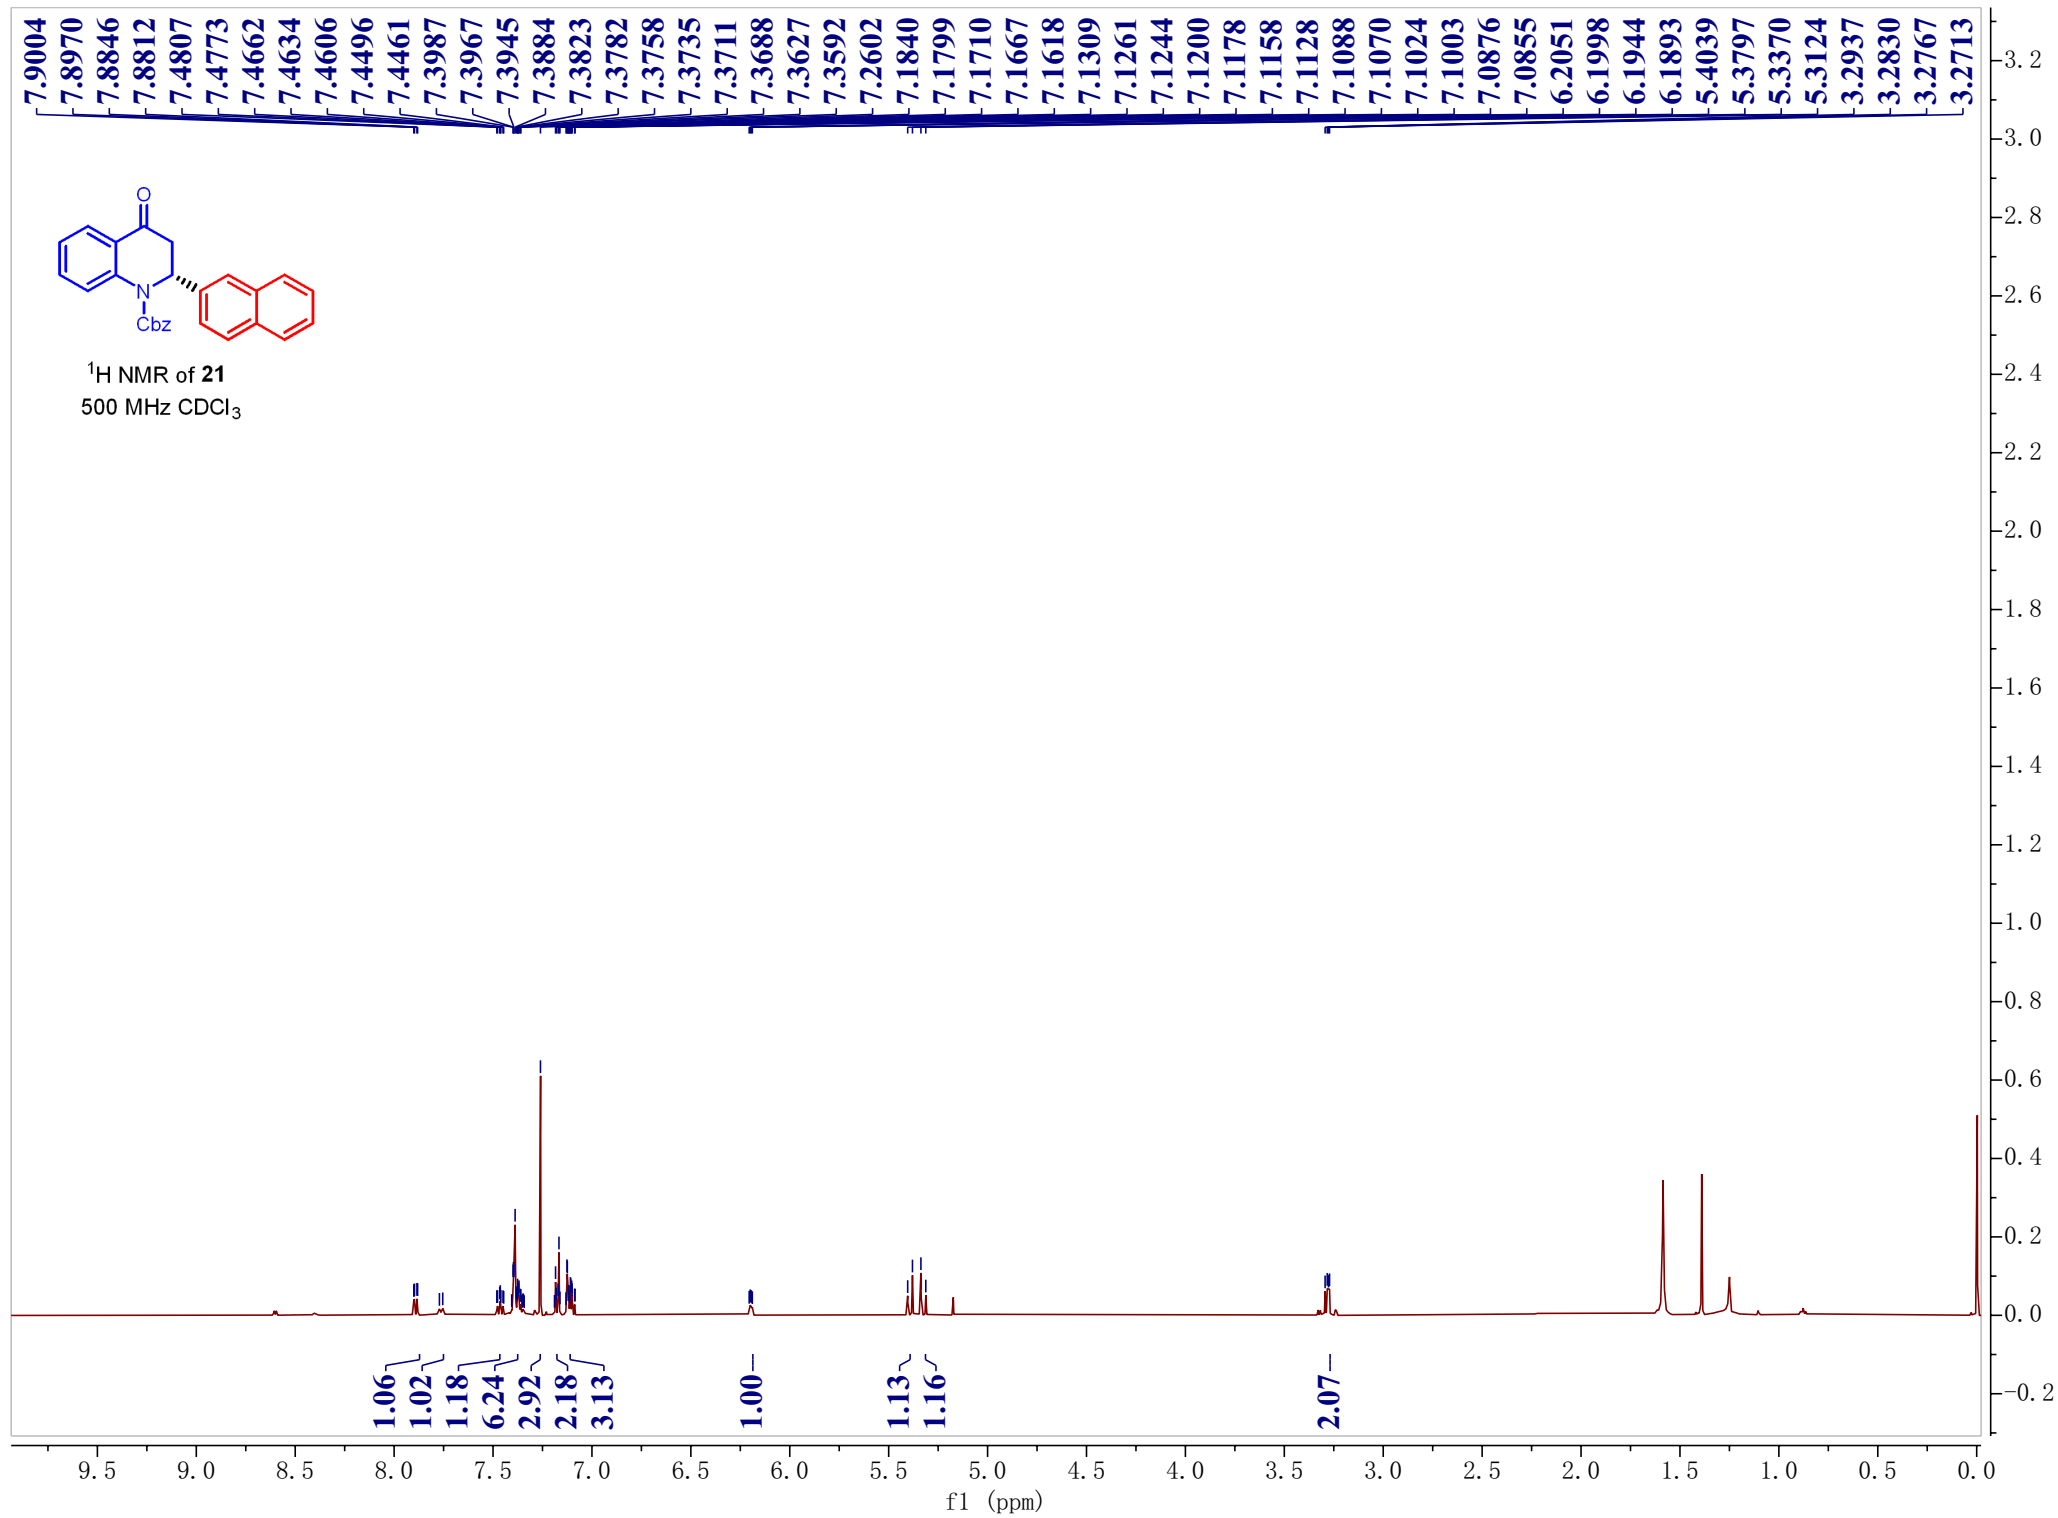

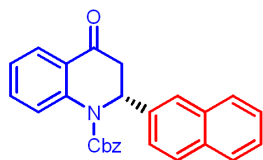

<sup>13</sup>C NMR of 21  
126 MHz CDCl<sub>3</sub>

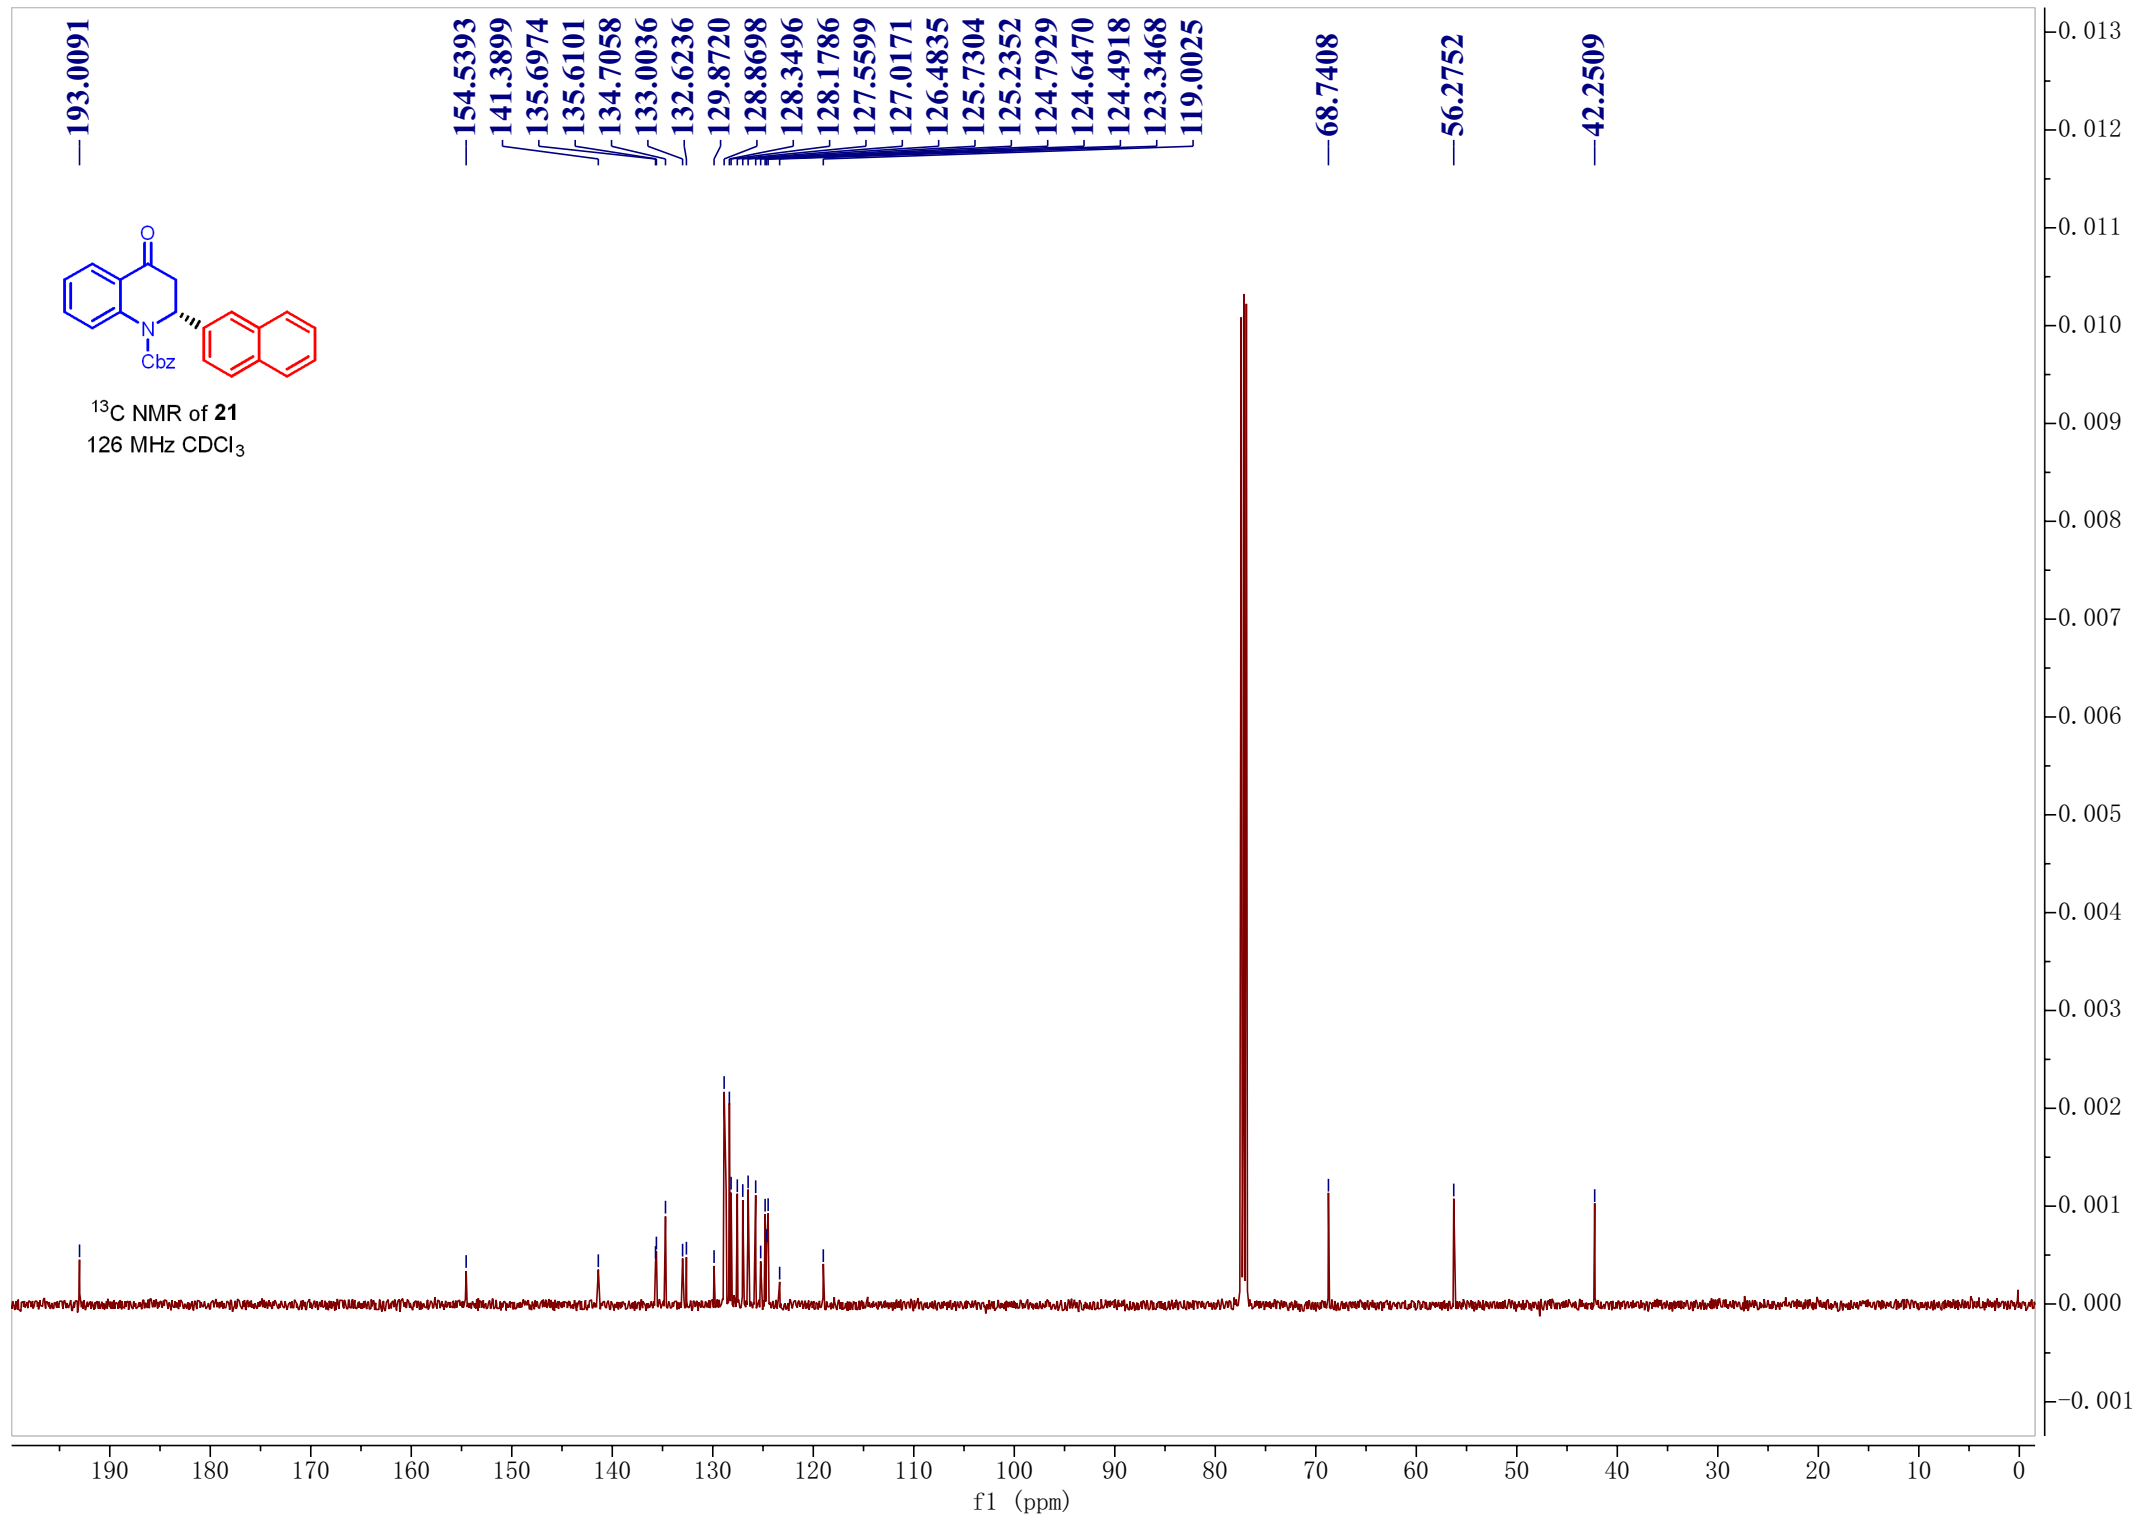



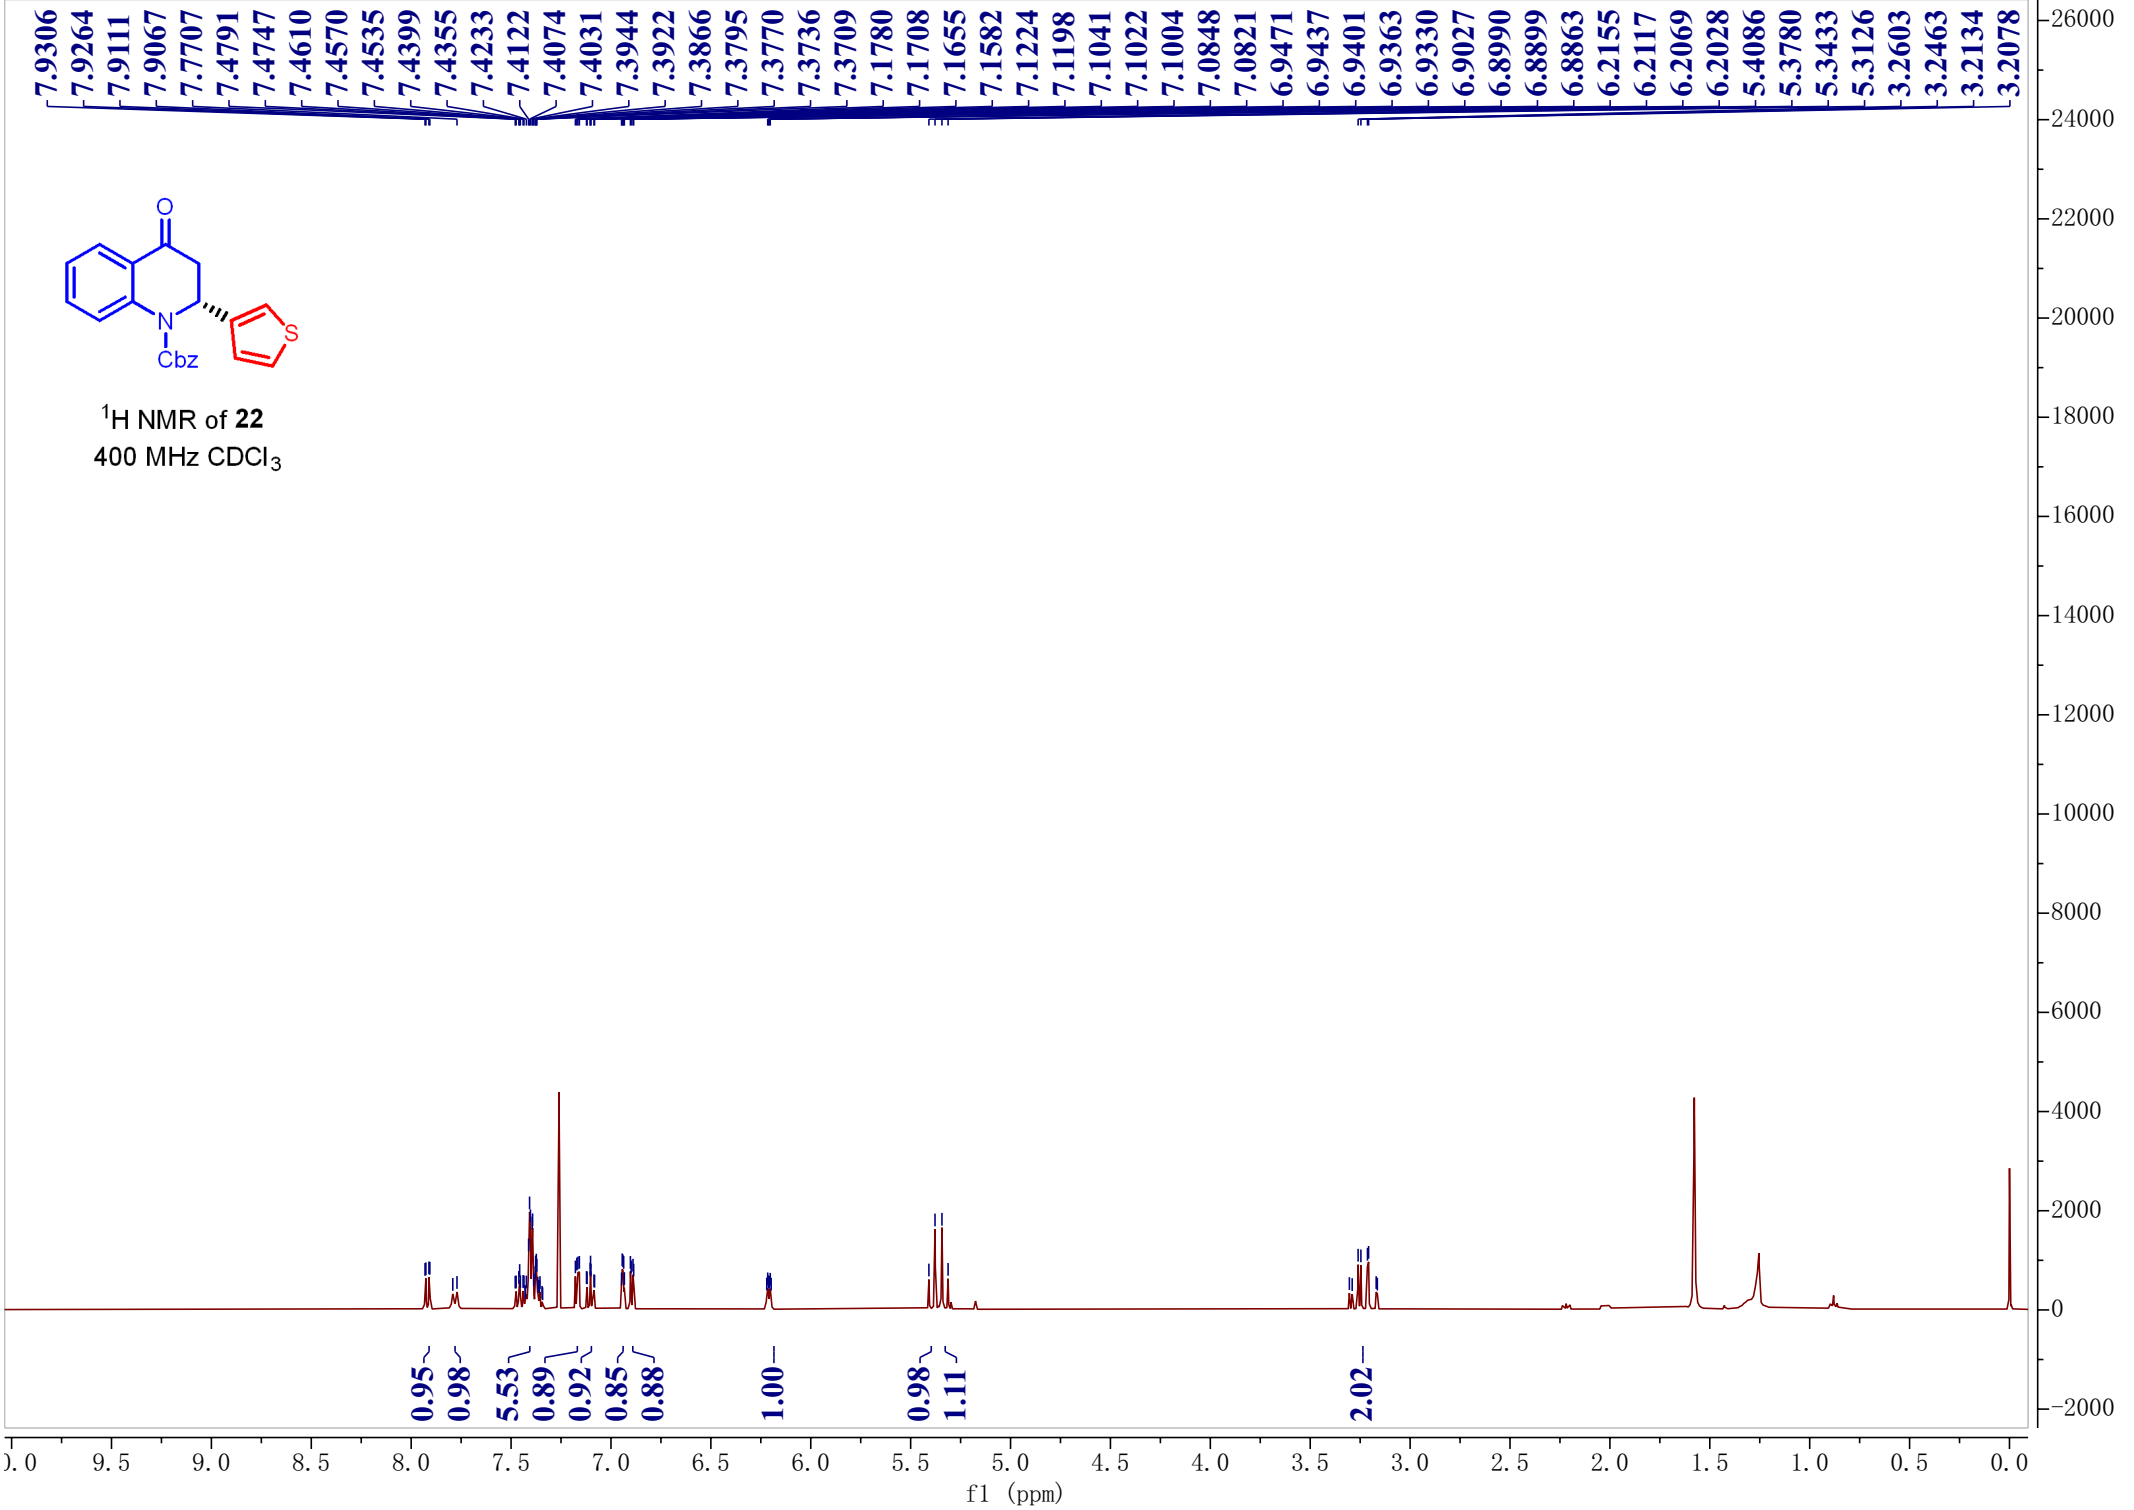

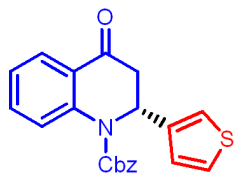

<sup>13</sup>C NMR of **22**  
126 MHz CDCl<sub>3</sub>

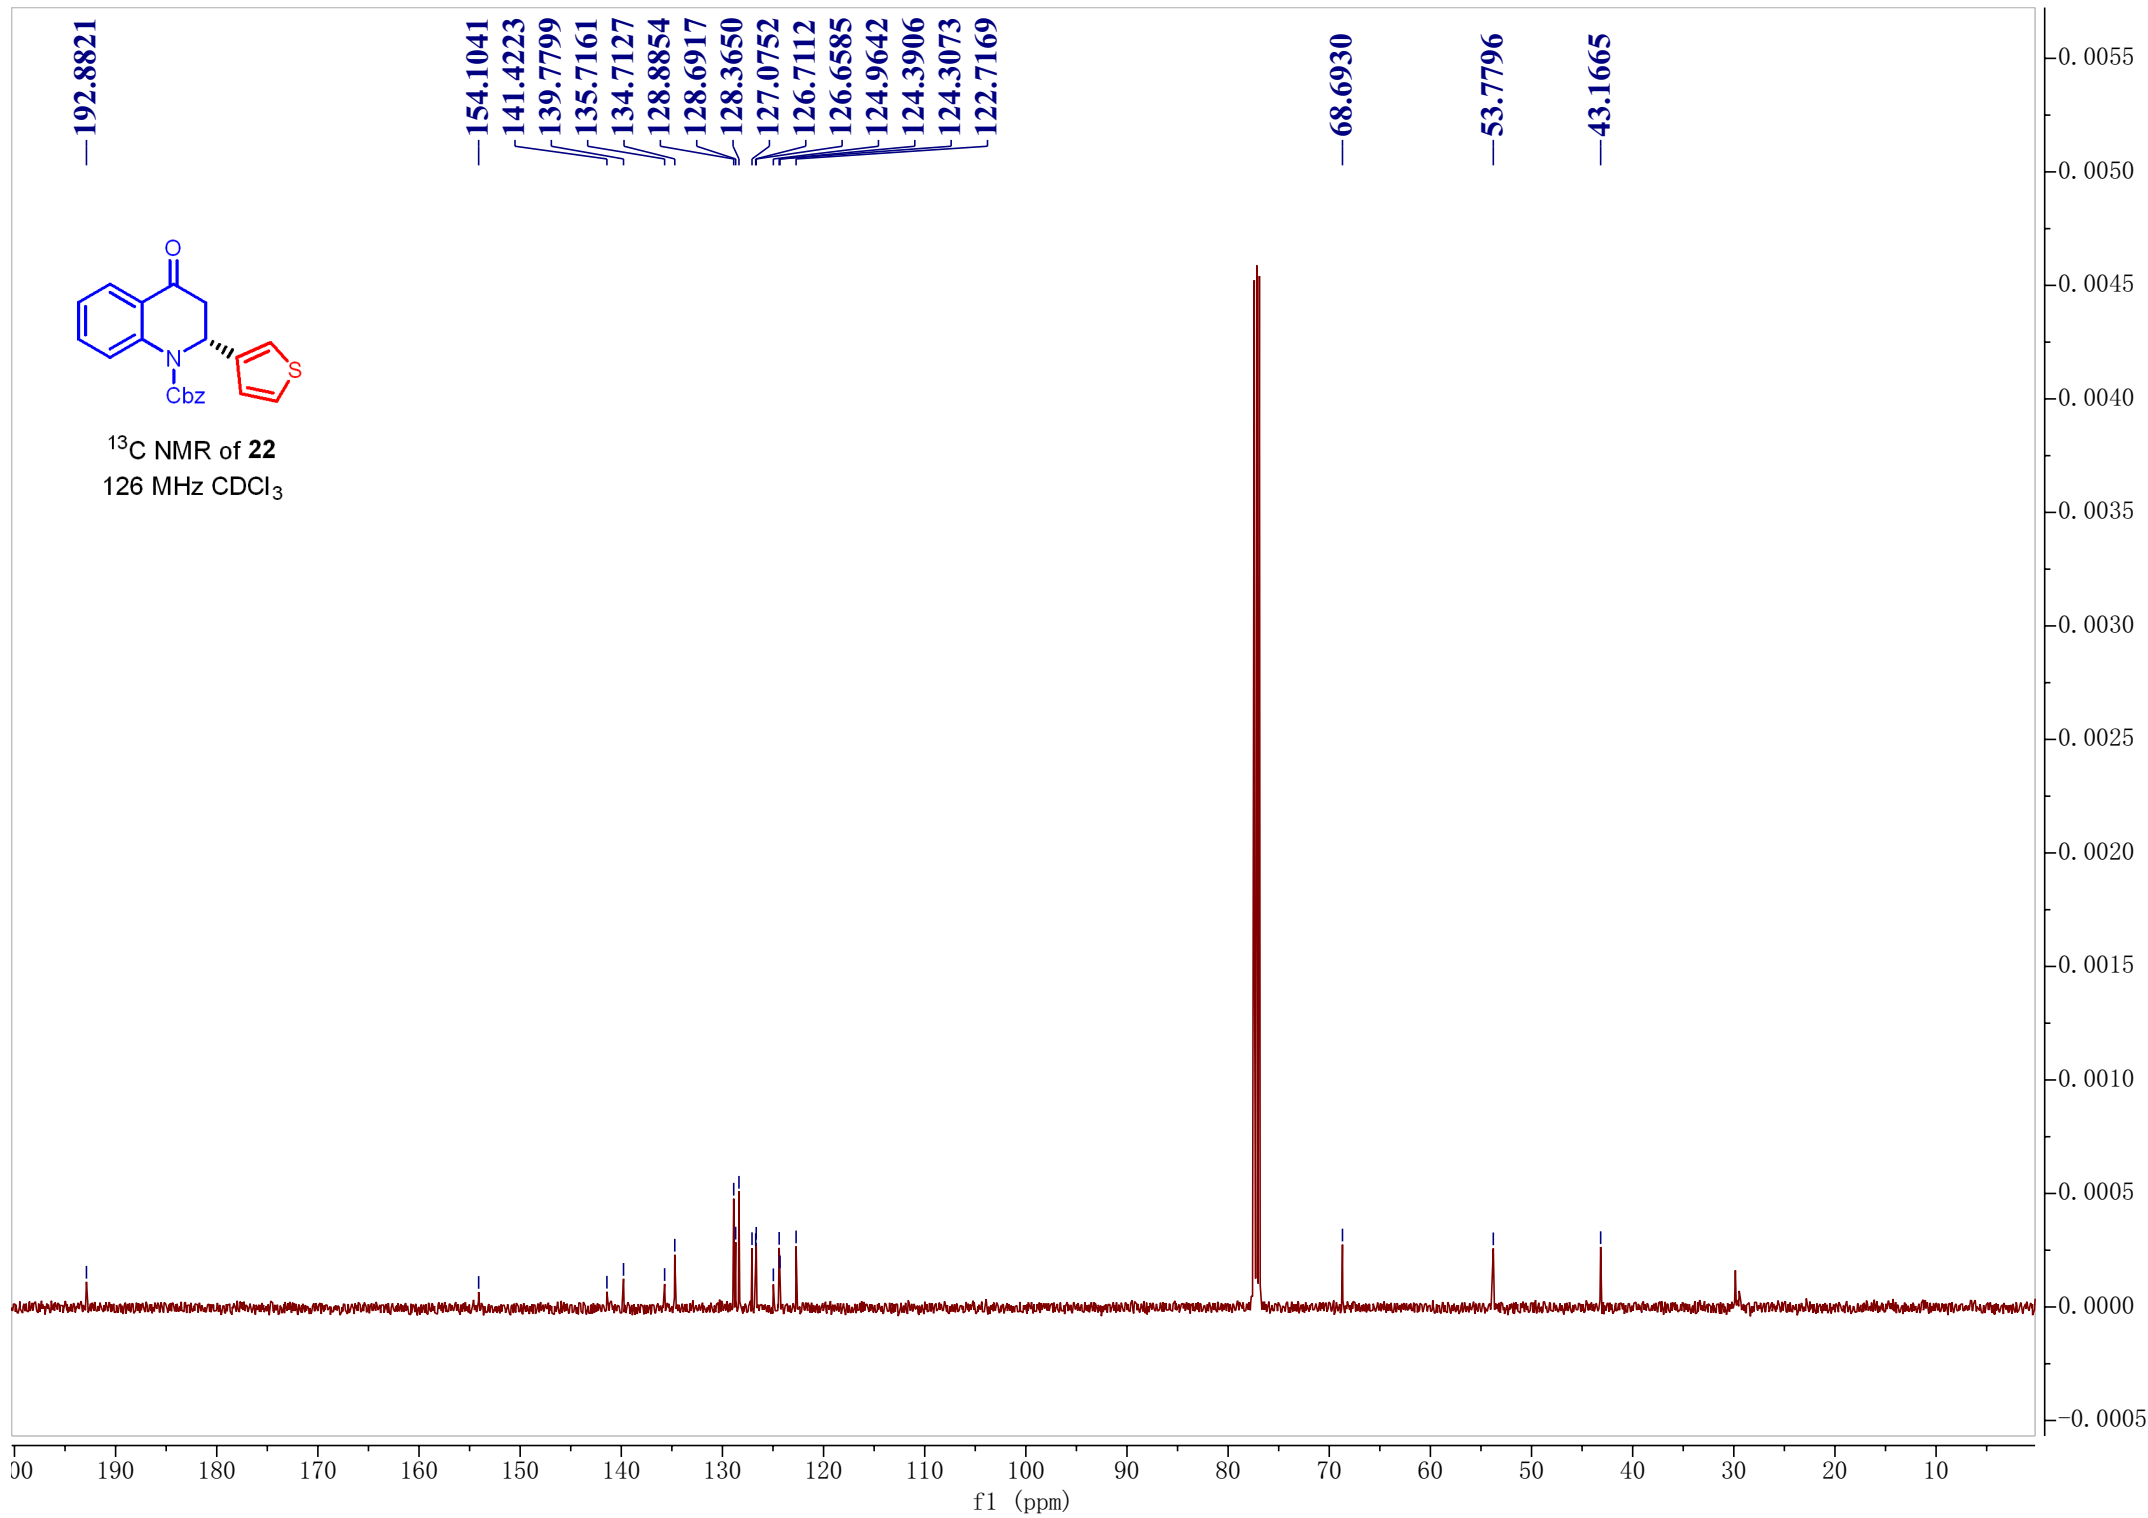

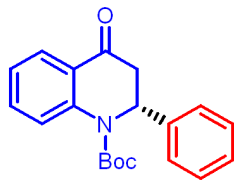

<sup>1</sup>H NMR of 24  
500 MHz CDCl<sub>3</sub>

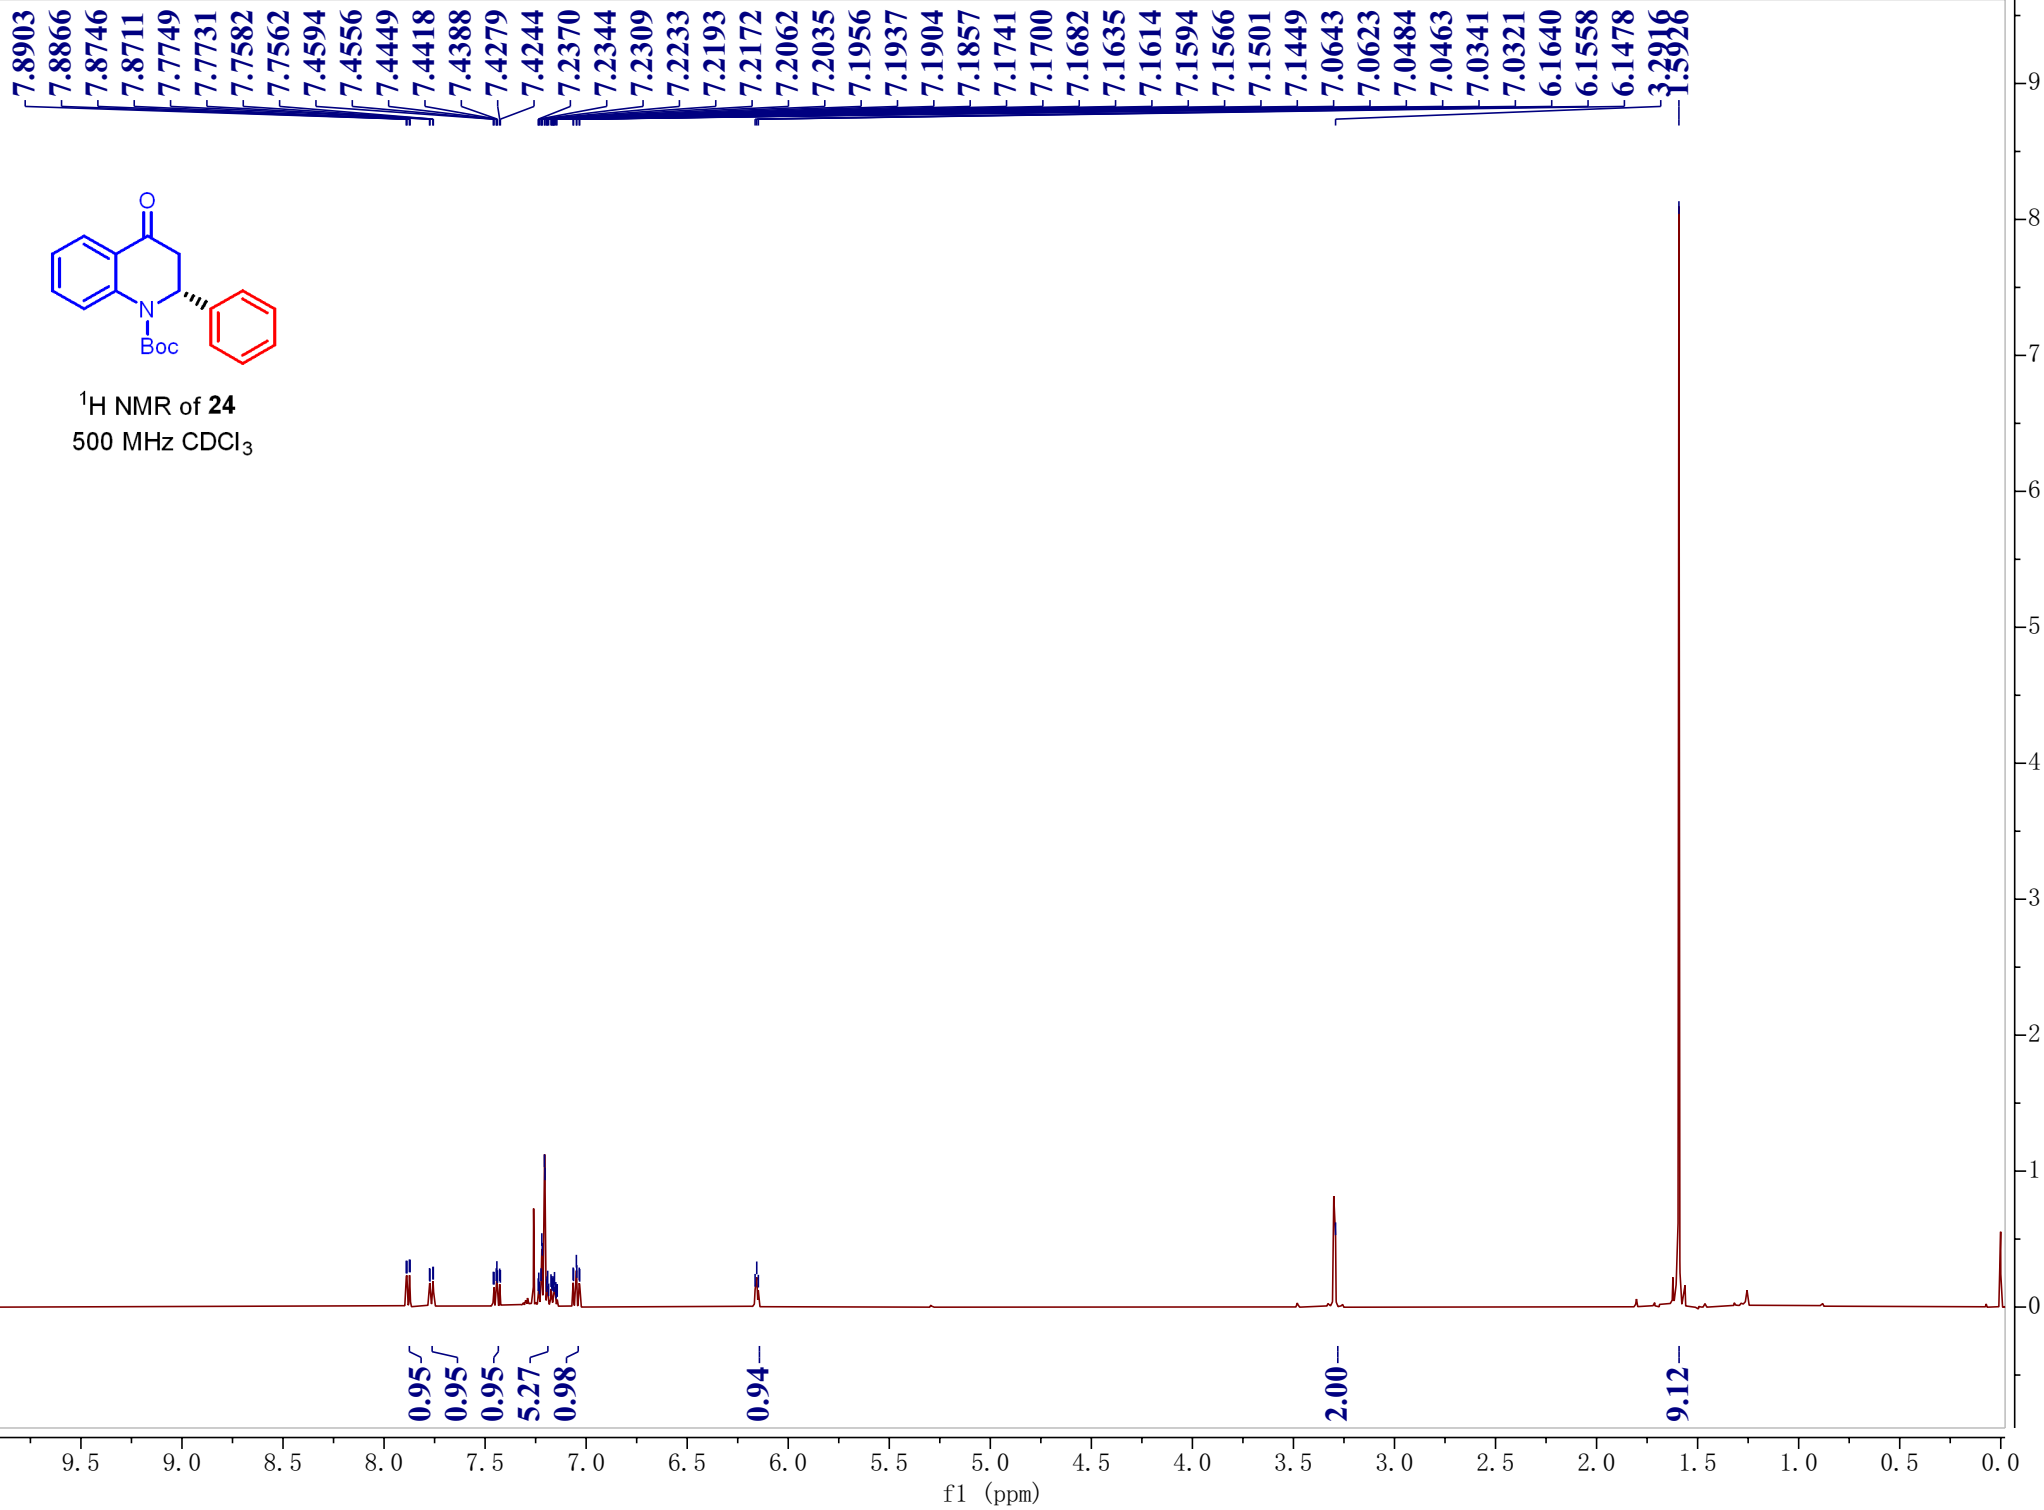

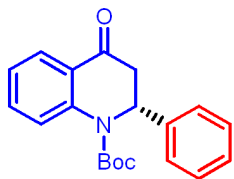

<sup>13</sup>C NMR of **24**  
126 MHz CDCl<sub>3</sub>

—193.2617

—153.4805

—142.2434

—138.7540

—134.4341

—128.7228

—127.5690

—126.9322

—126.7072

—125.0979

—124.7376

—123.8411

—82.7455

—55.8670

—42.4929

—28.4576

f1 (ppm)

0.030  
0.028  
0.026  
0.024  
0.022  
0.020  
0.018  
0.016  
0.014  
0.012  
0.010  
0.008  
0.006  
0.004  
0.002  
0.000  
-0.002

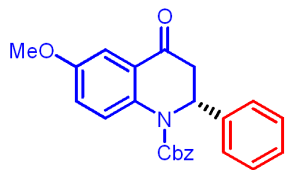

<sup>1</sup>H NMR of **25**  
500 MHz CDCl<sub>3</sub>

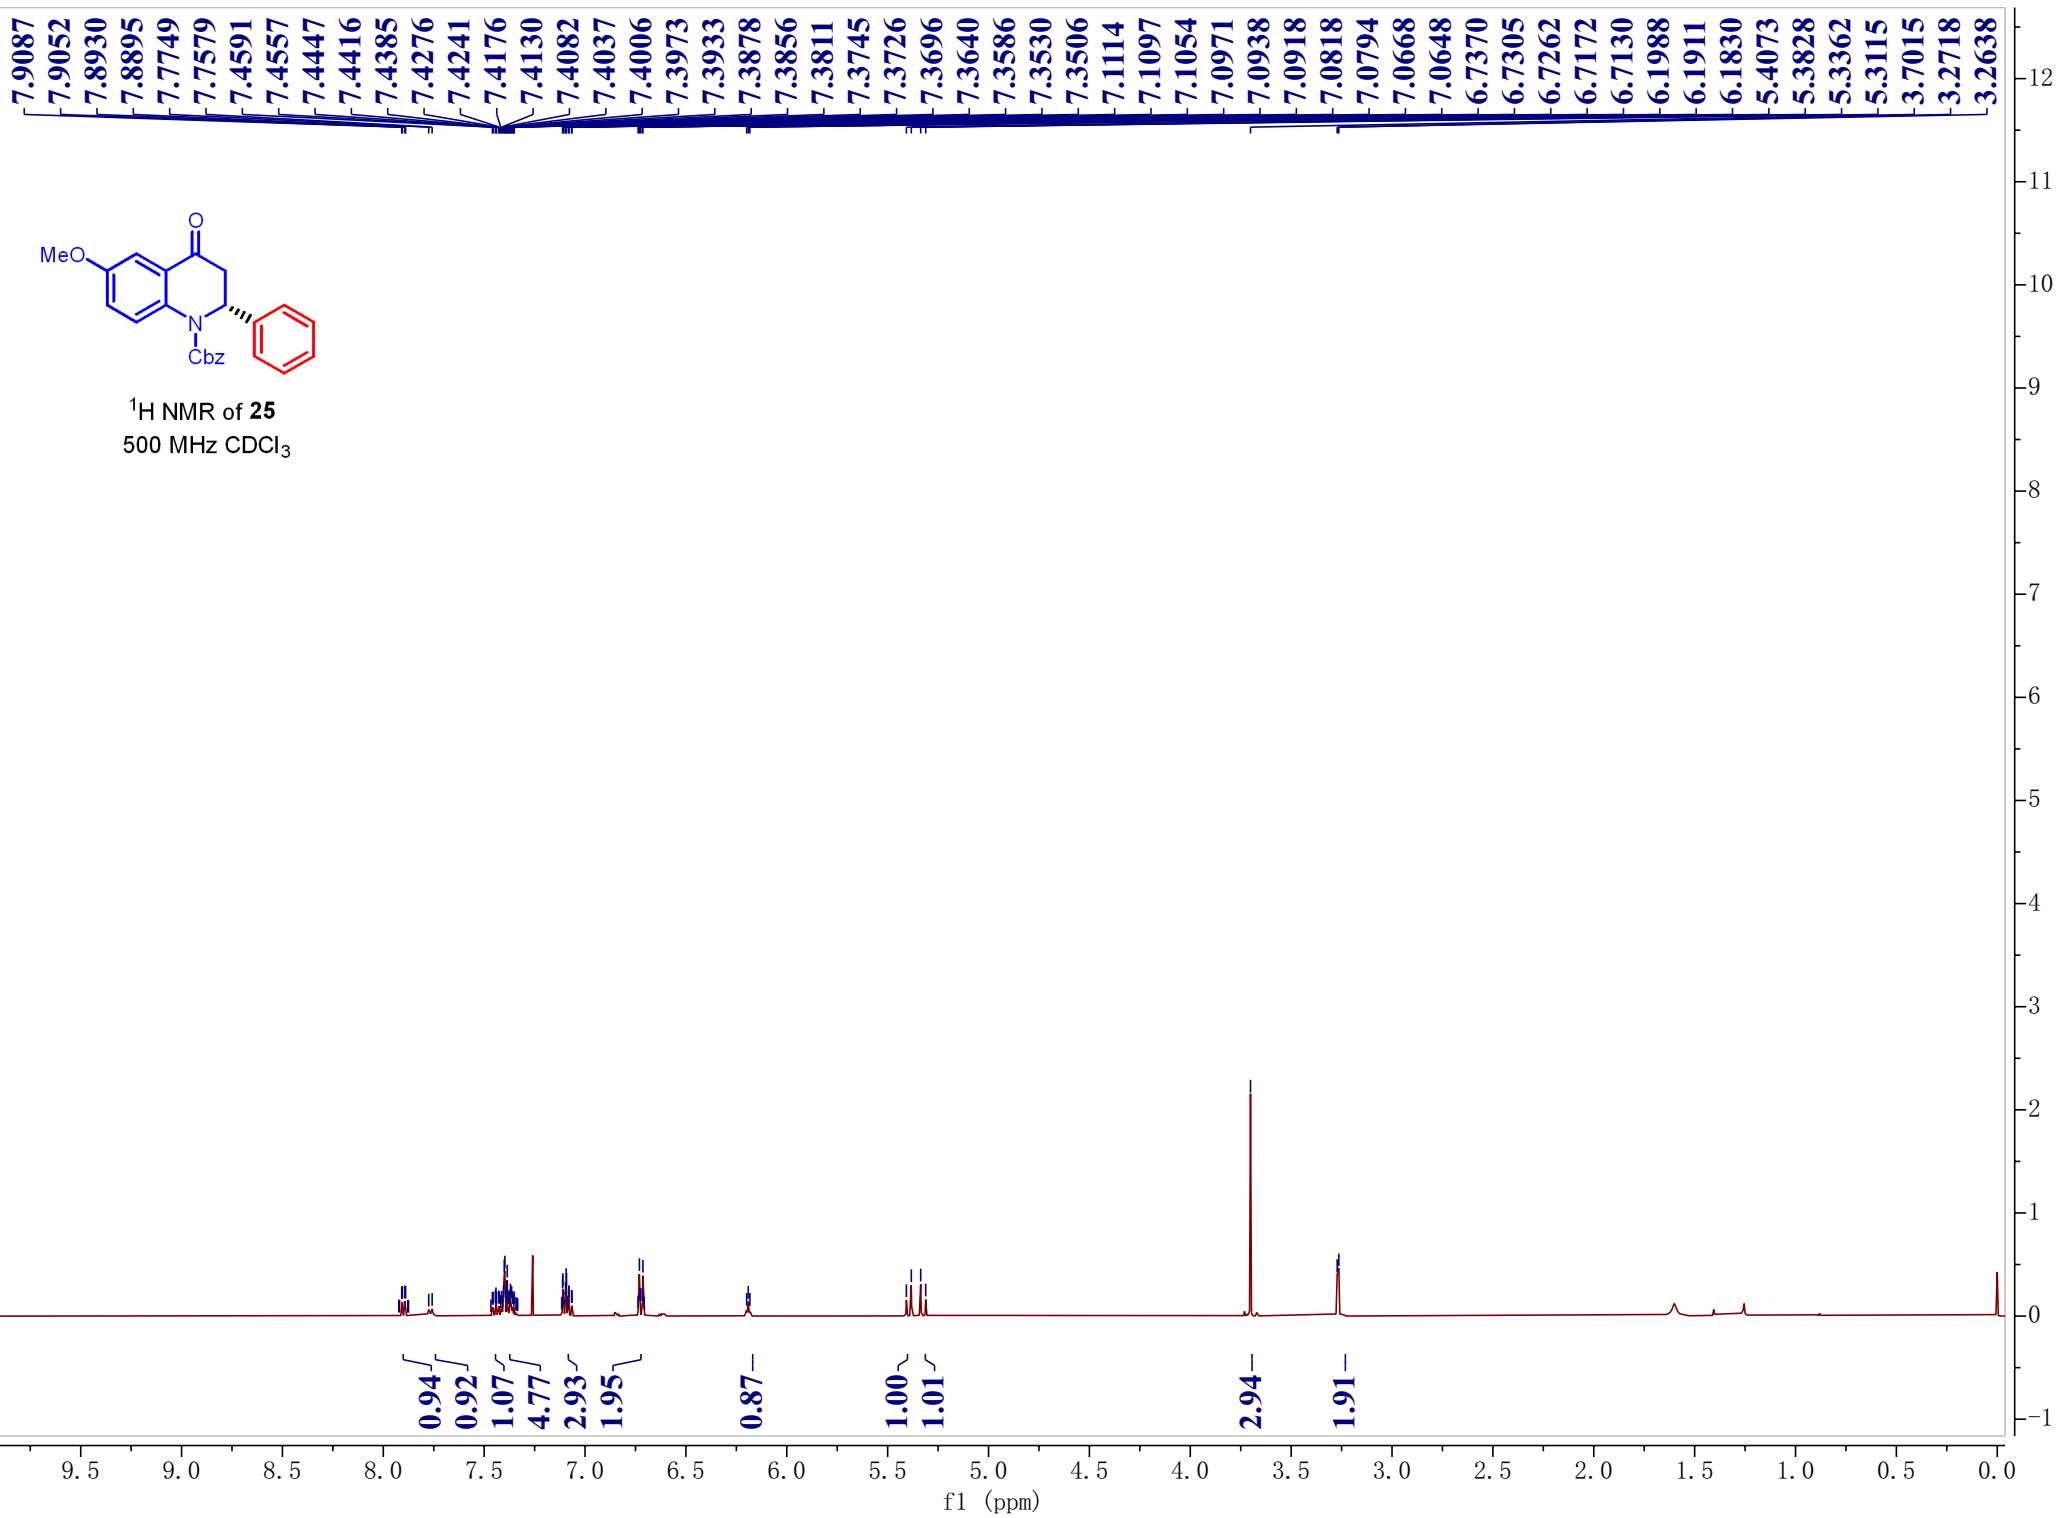

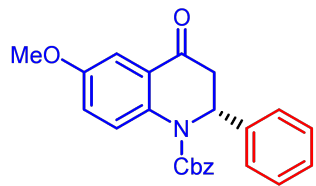

<sup>13</sup>C NMR of 25  
126 MHz, CDCl<sub>3</sub>

—193.1414  
—158.9324  
—154.4084  
—141.4565  
—135.7050  
—134.6606  
—130.1086  
—128.8213  
—128.6056  
—128.2916  
—127.9449  
—126.9290  
—125.1556  
—124.5707  
—124.2985  
—118.9749  
—114.0471

—68.5856

{55.7647  
55.2607

—42.5185

f1 (ppm)

0.016  
0.015  
0.014  
0.013  
0.012  
0.011  
0.010  
0.009  
0.008  
0.007  
0.006  
0.005  
0.004  
0.003  
0.002  
0.001  
0.000  
-0.001

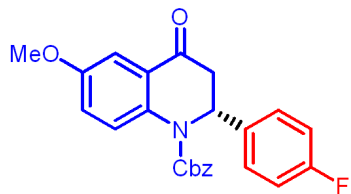

<sup>1</sup>H NMR of 26  
500 MHz CDCl<sub>3</sub>

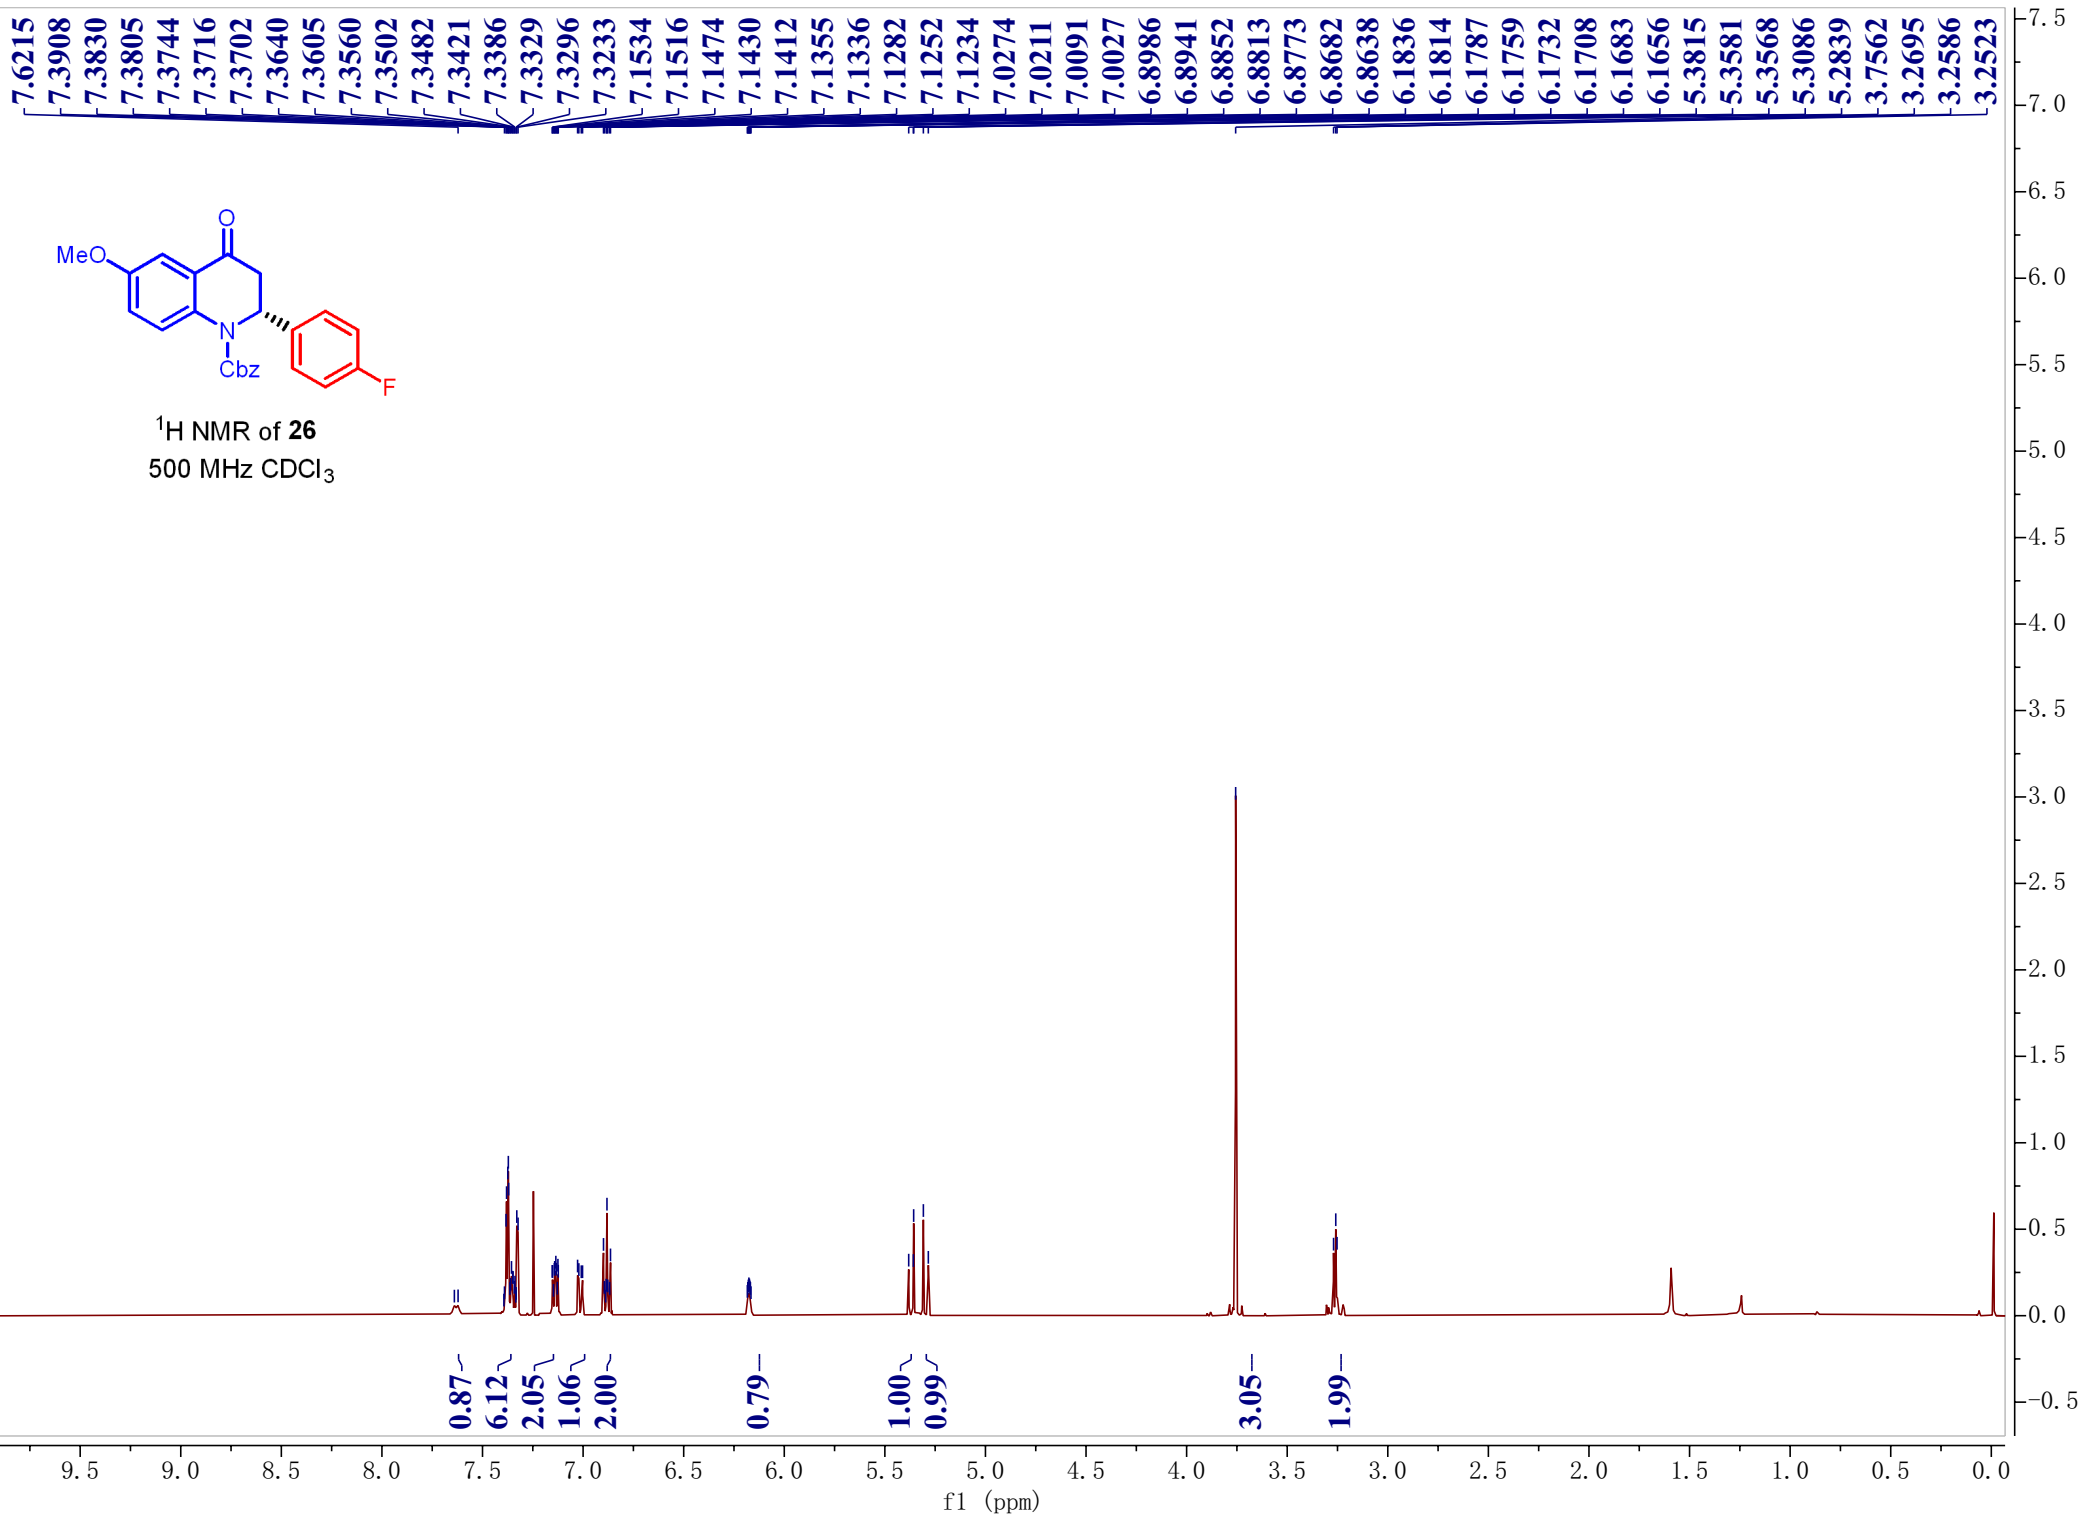

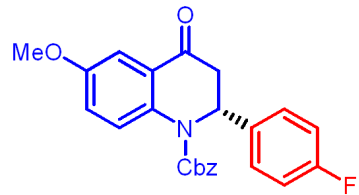

<sup>13</sup>C NMR of **26**  
126 MHz CDCl<sub>3</sub>

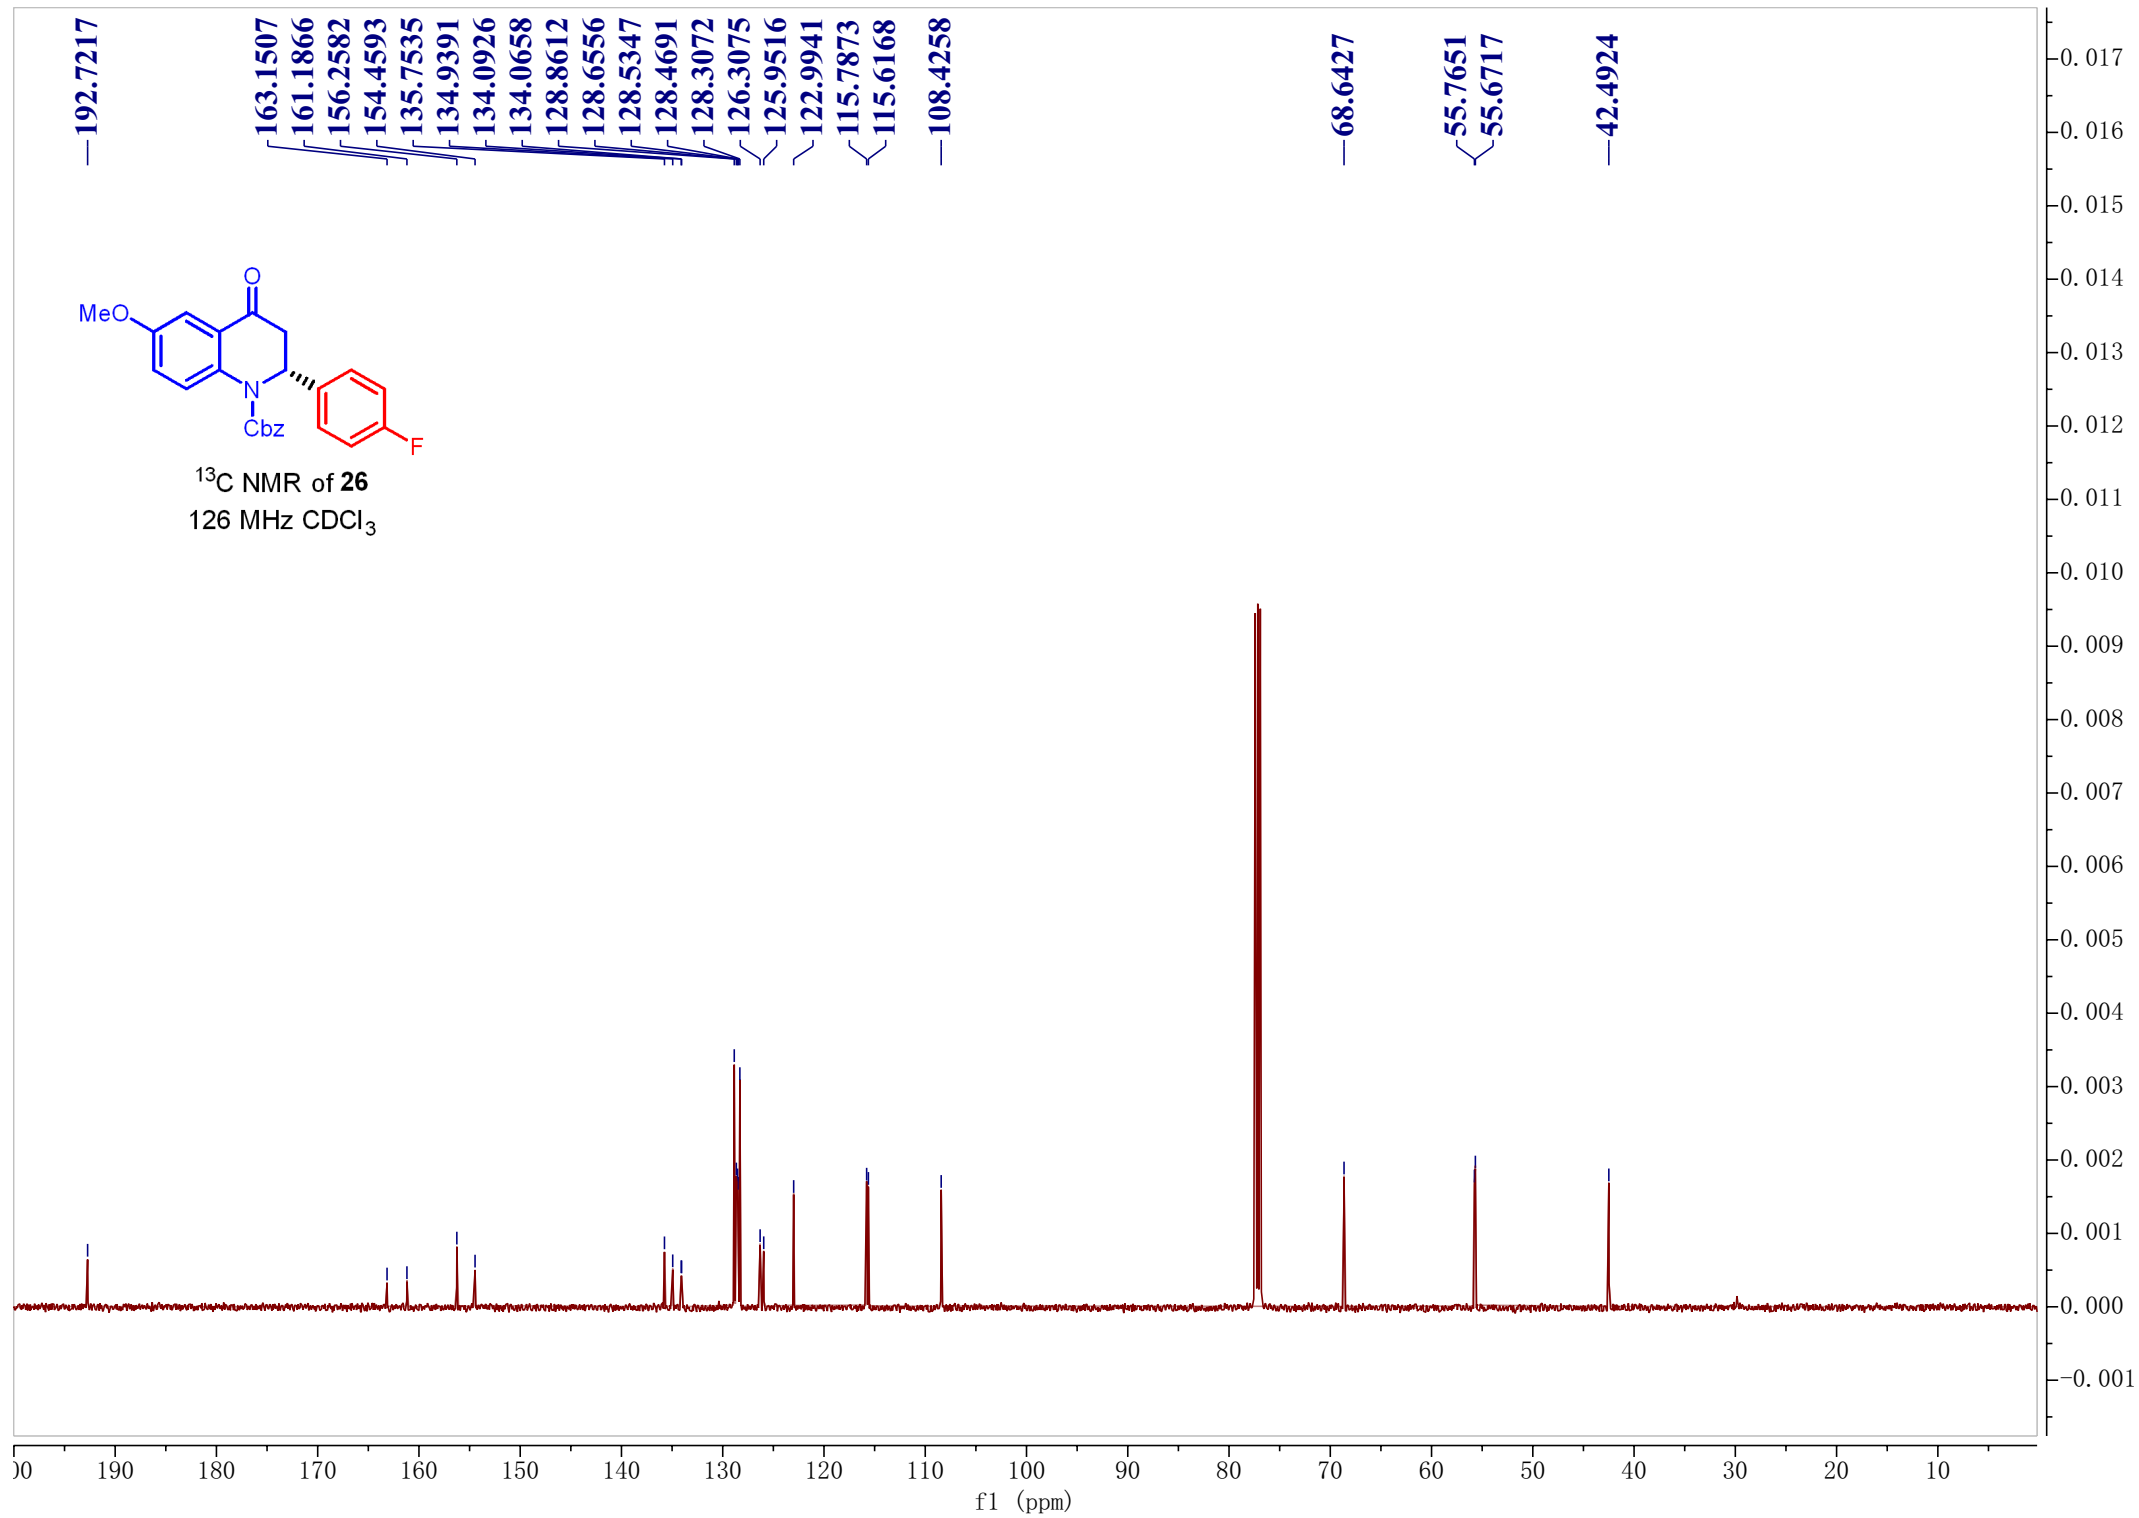



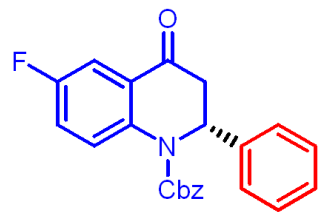

<sup>1</sup>H NMR of **27**  
500 MHz CDCl<sub>3</sub>

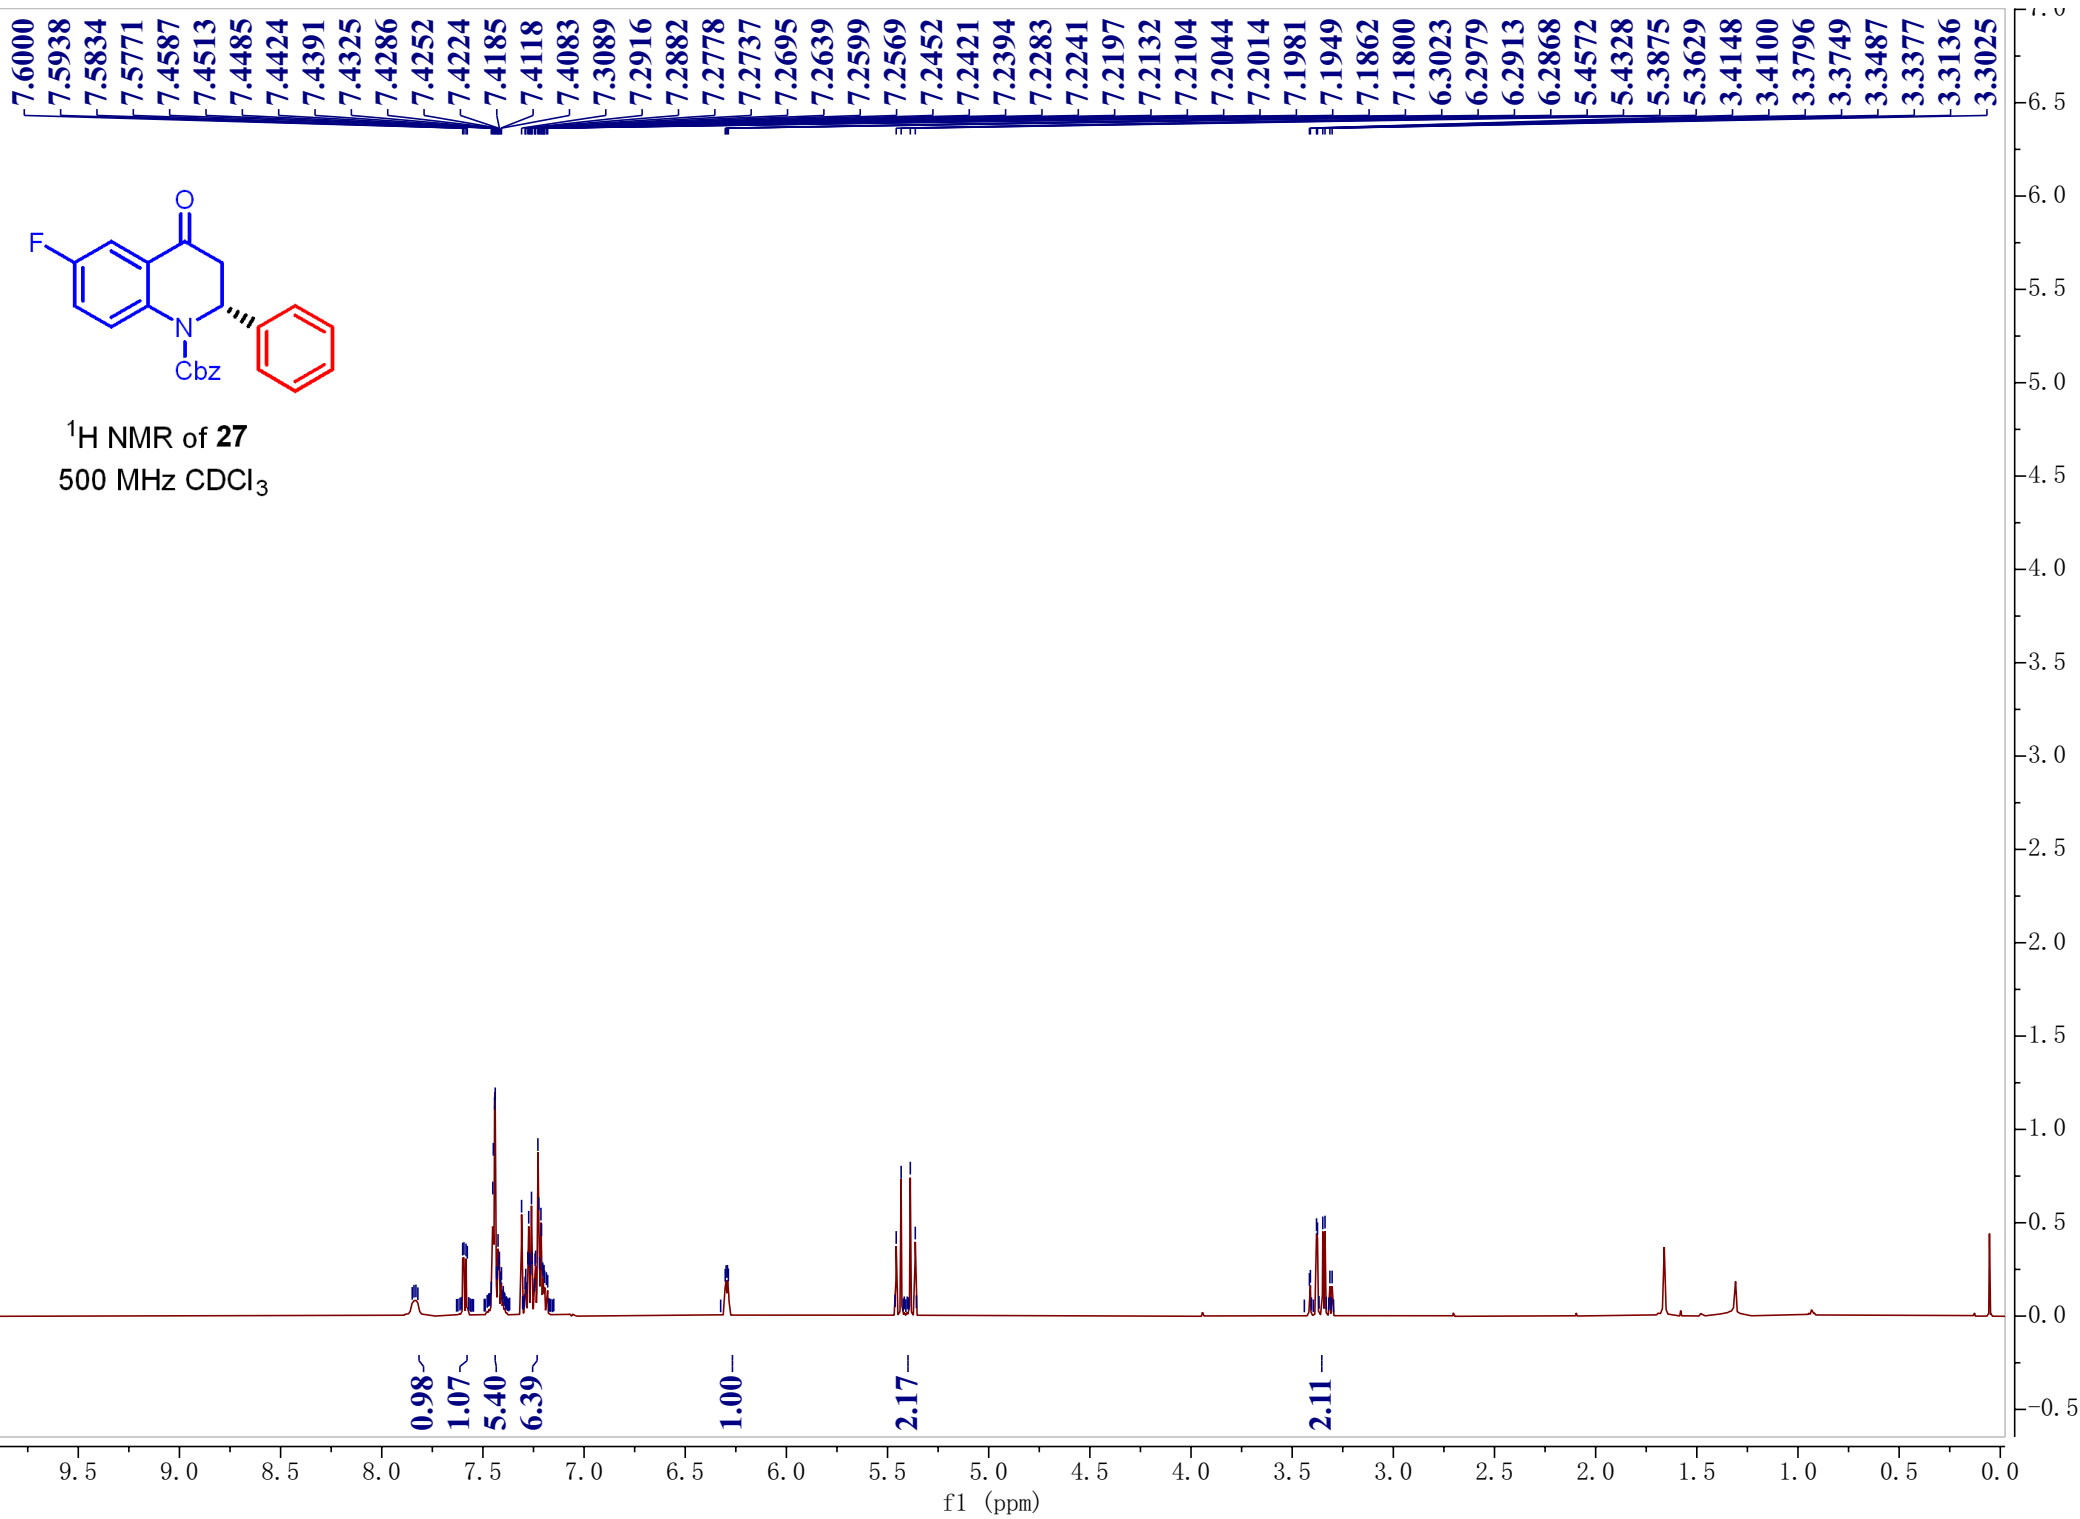

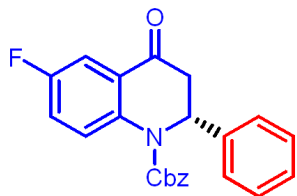

<sup>13</sup>C NMR of **27**  
126 MHz CDCl<sub>3</sub>

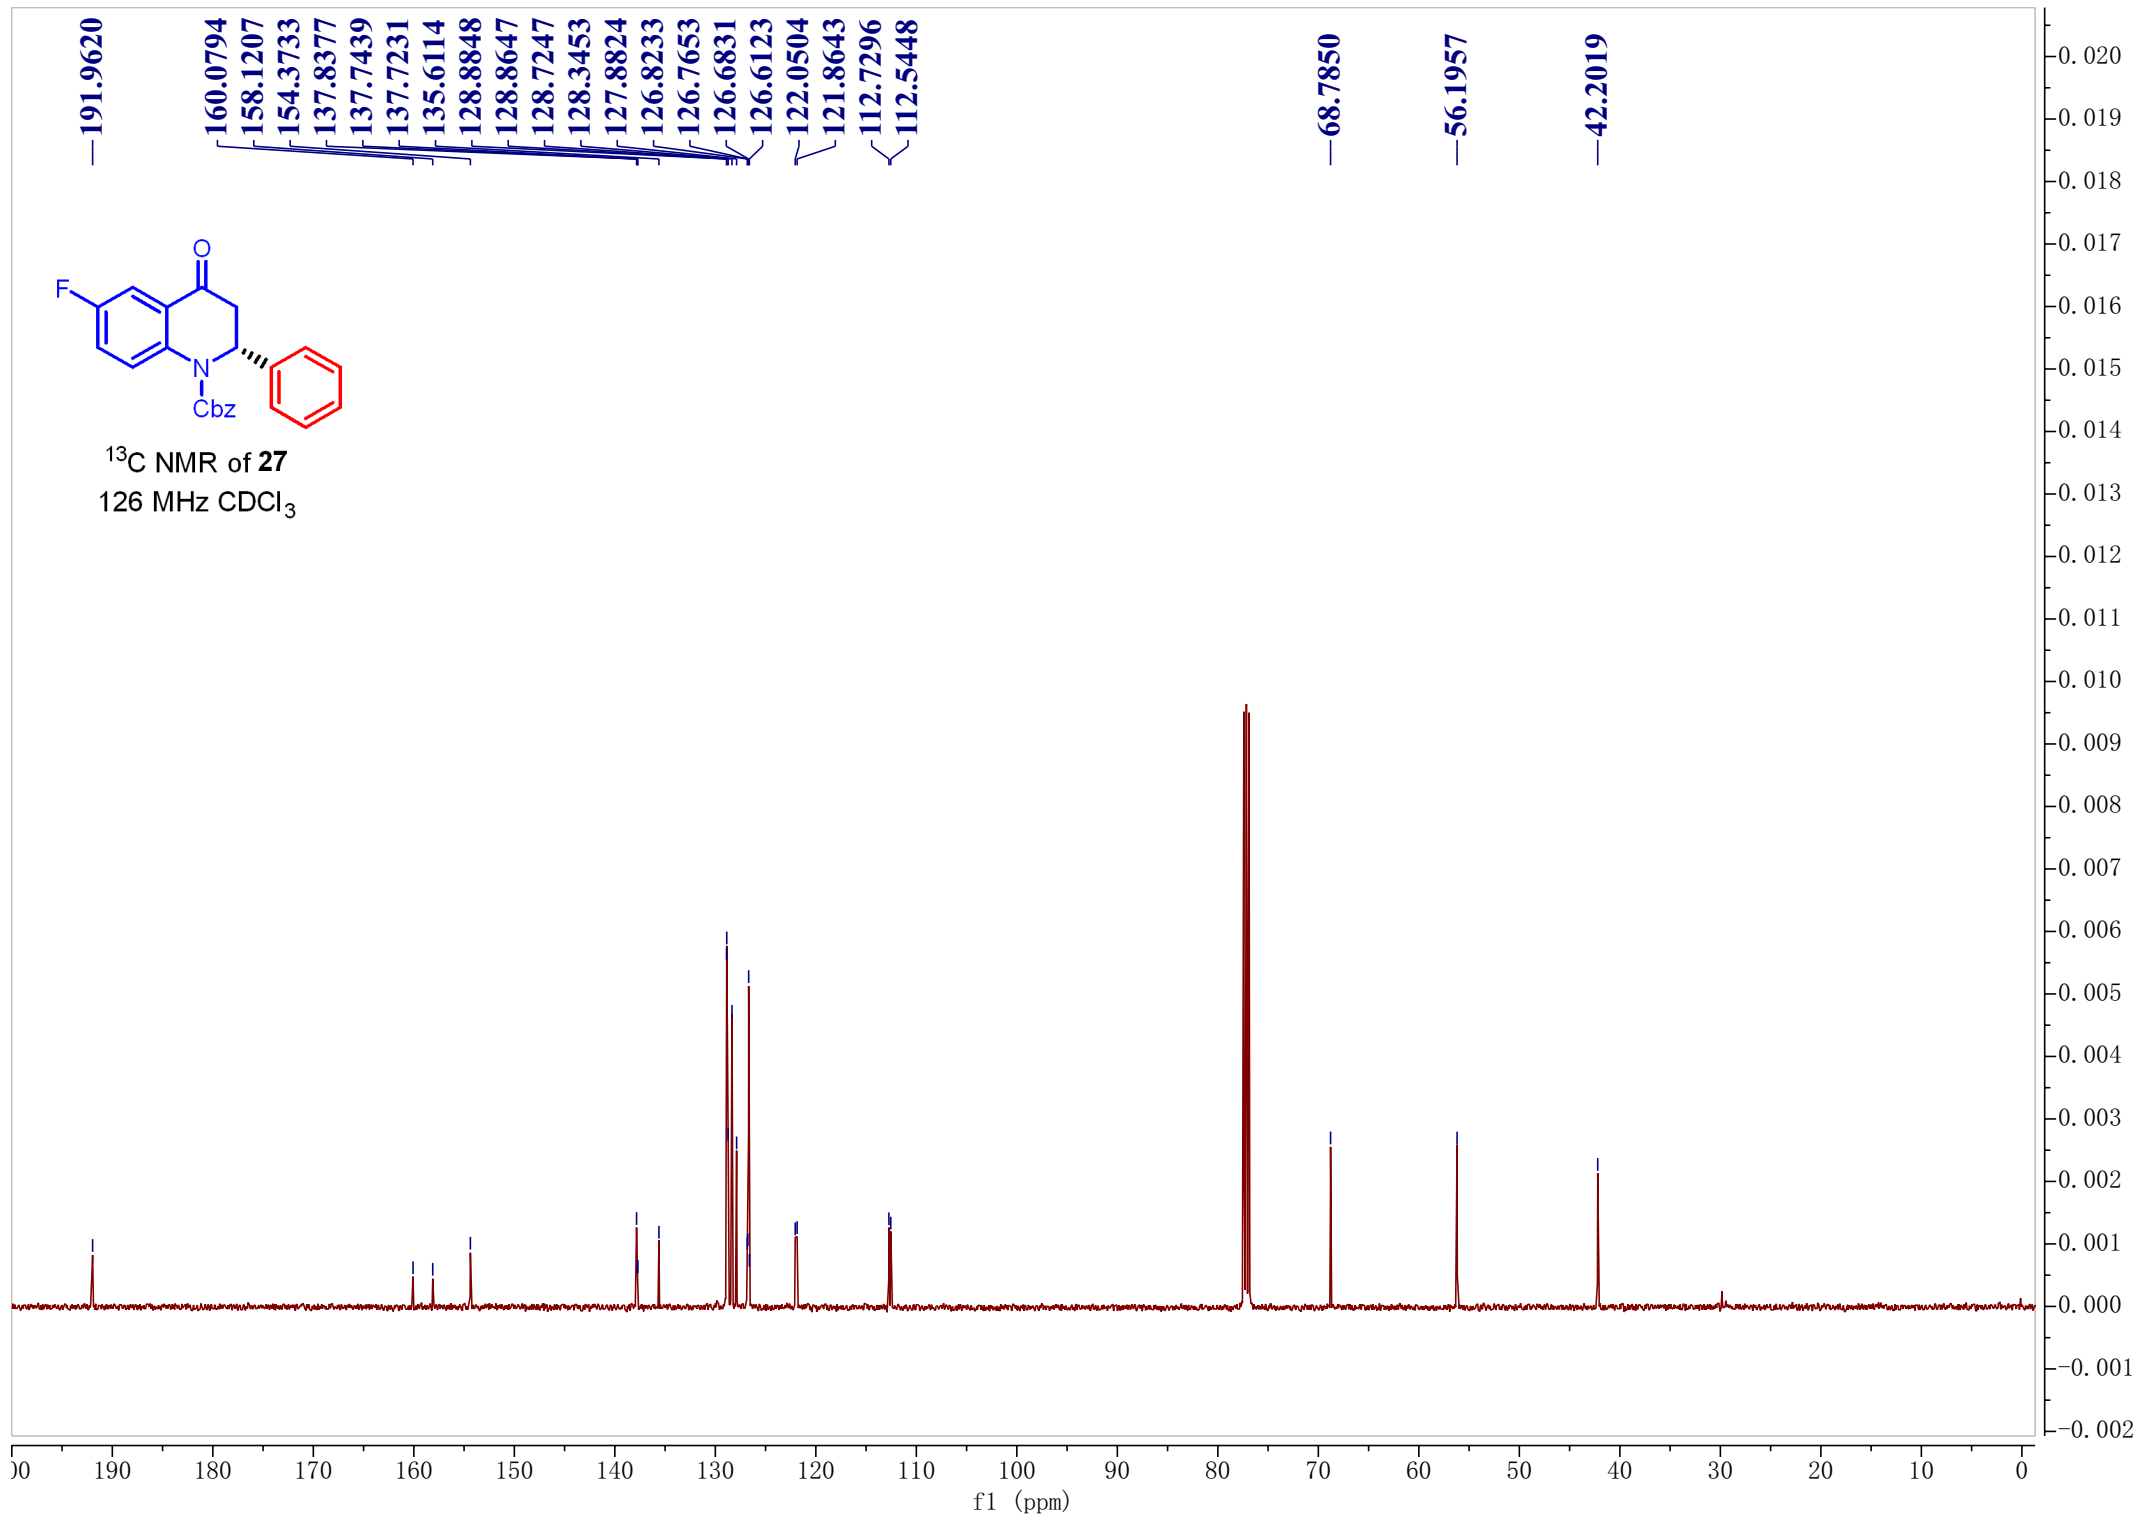

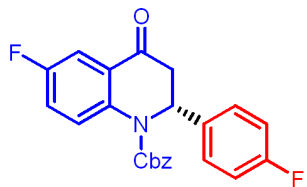

<sup>1</sup>H NMR of **28**  
500 MHz CDCl<sub>3</sub>

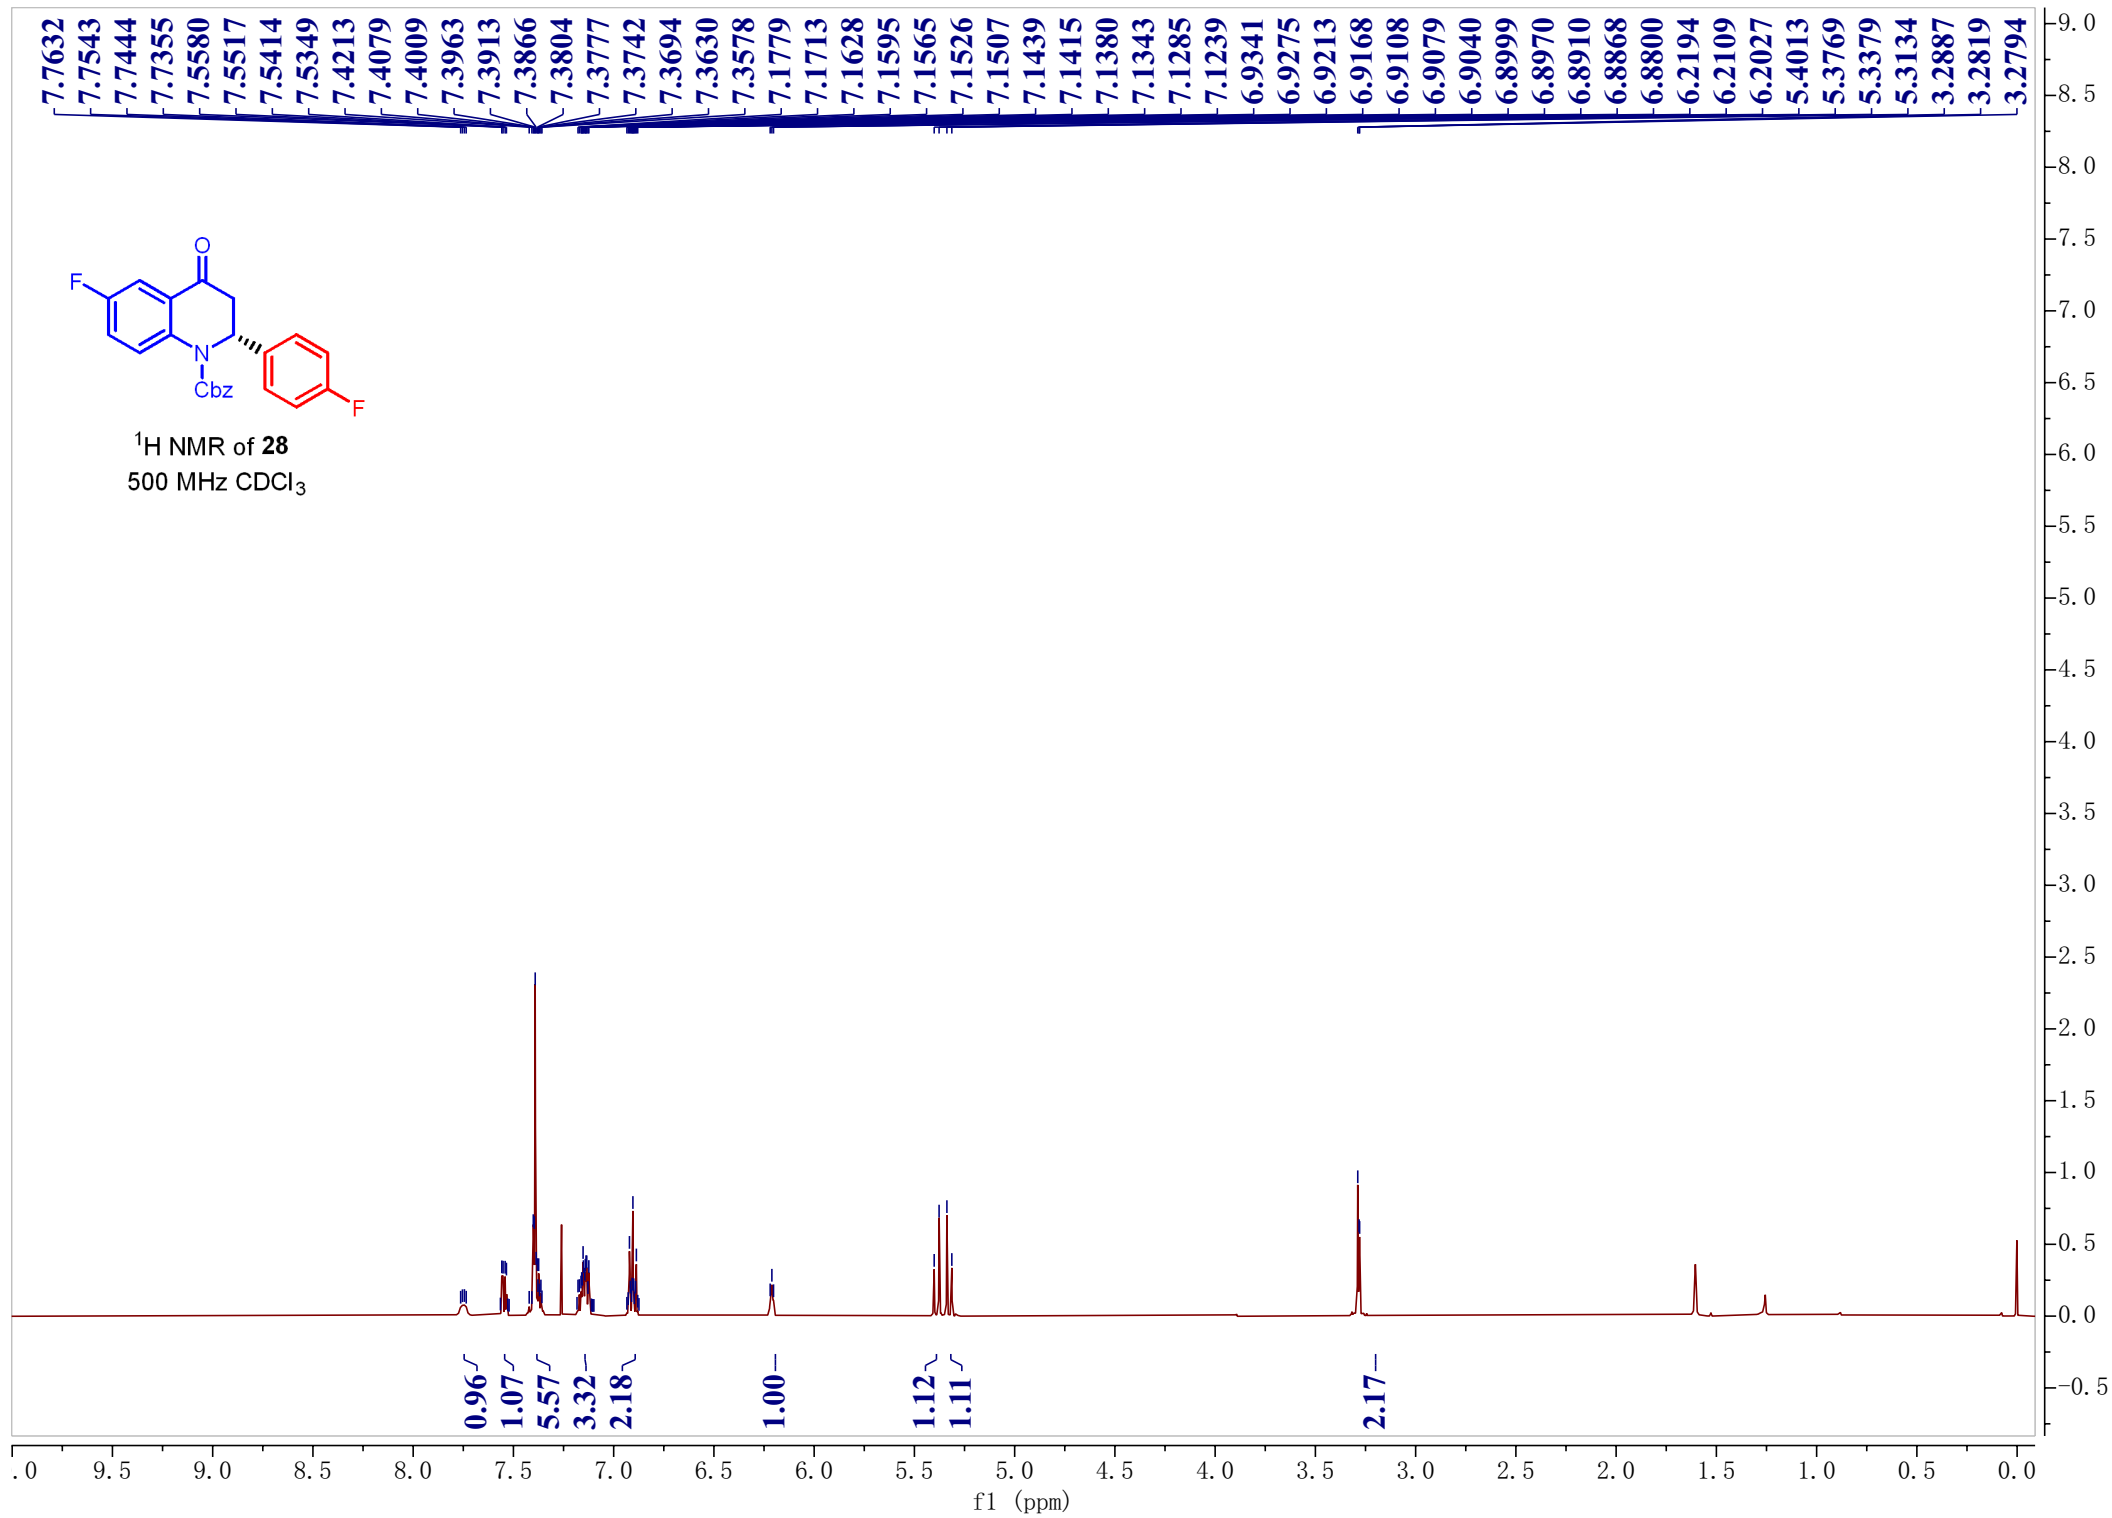

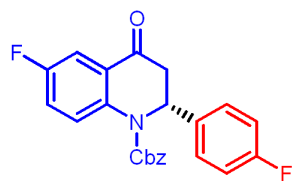

<sup>13</sup>C NMR of **28**  
126 MHz CDCl<sub>3</sub>

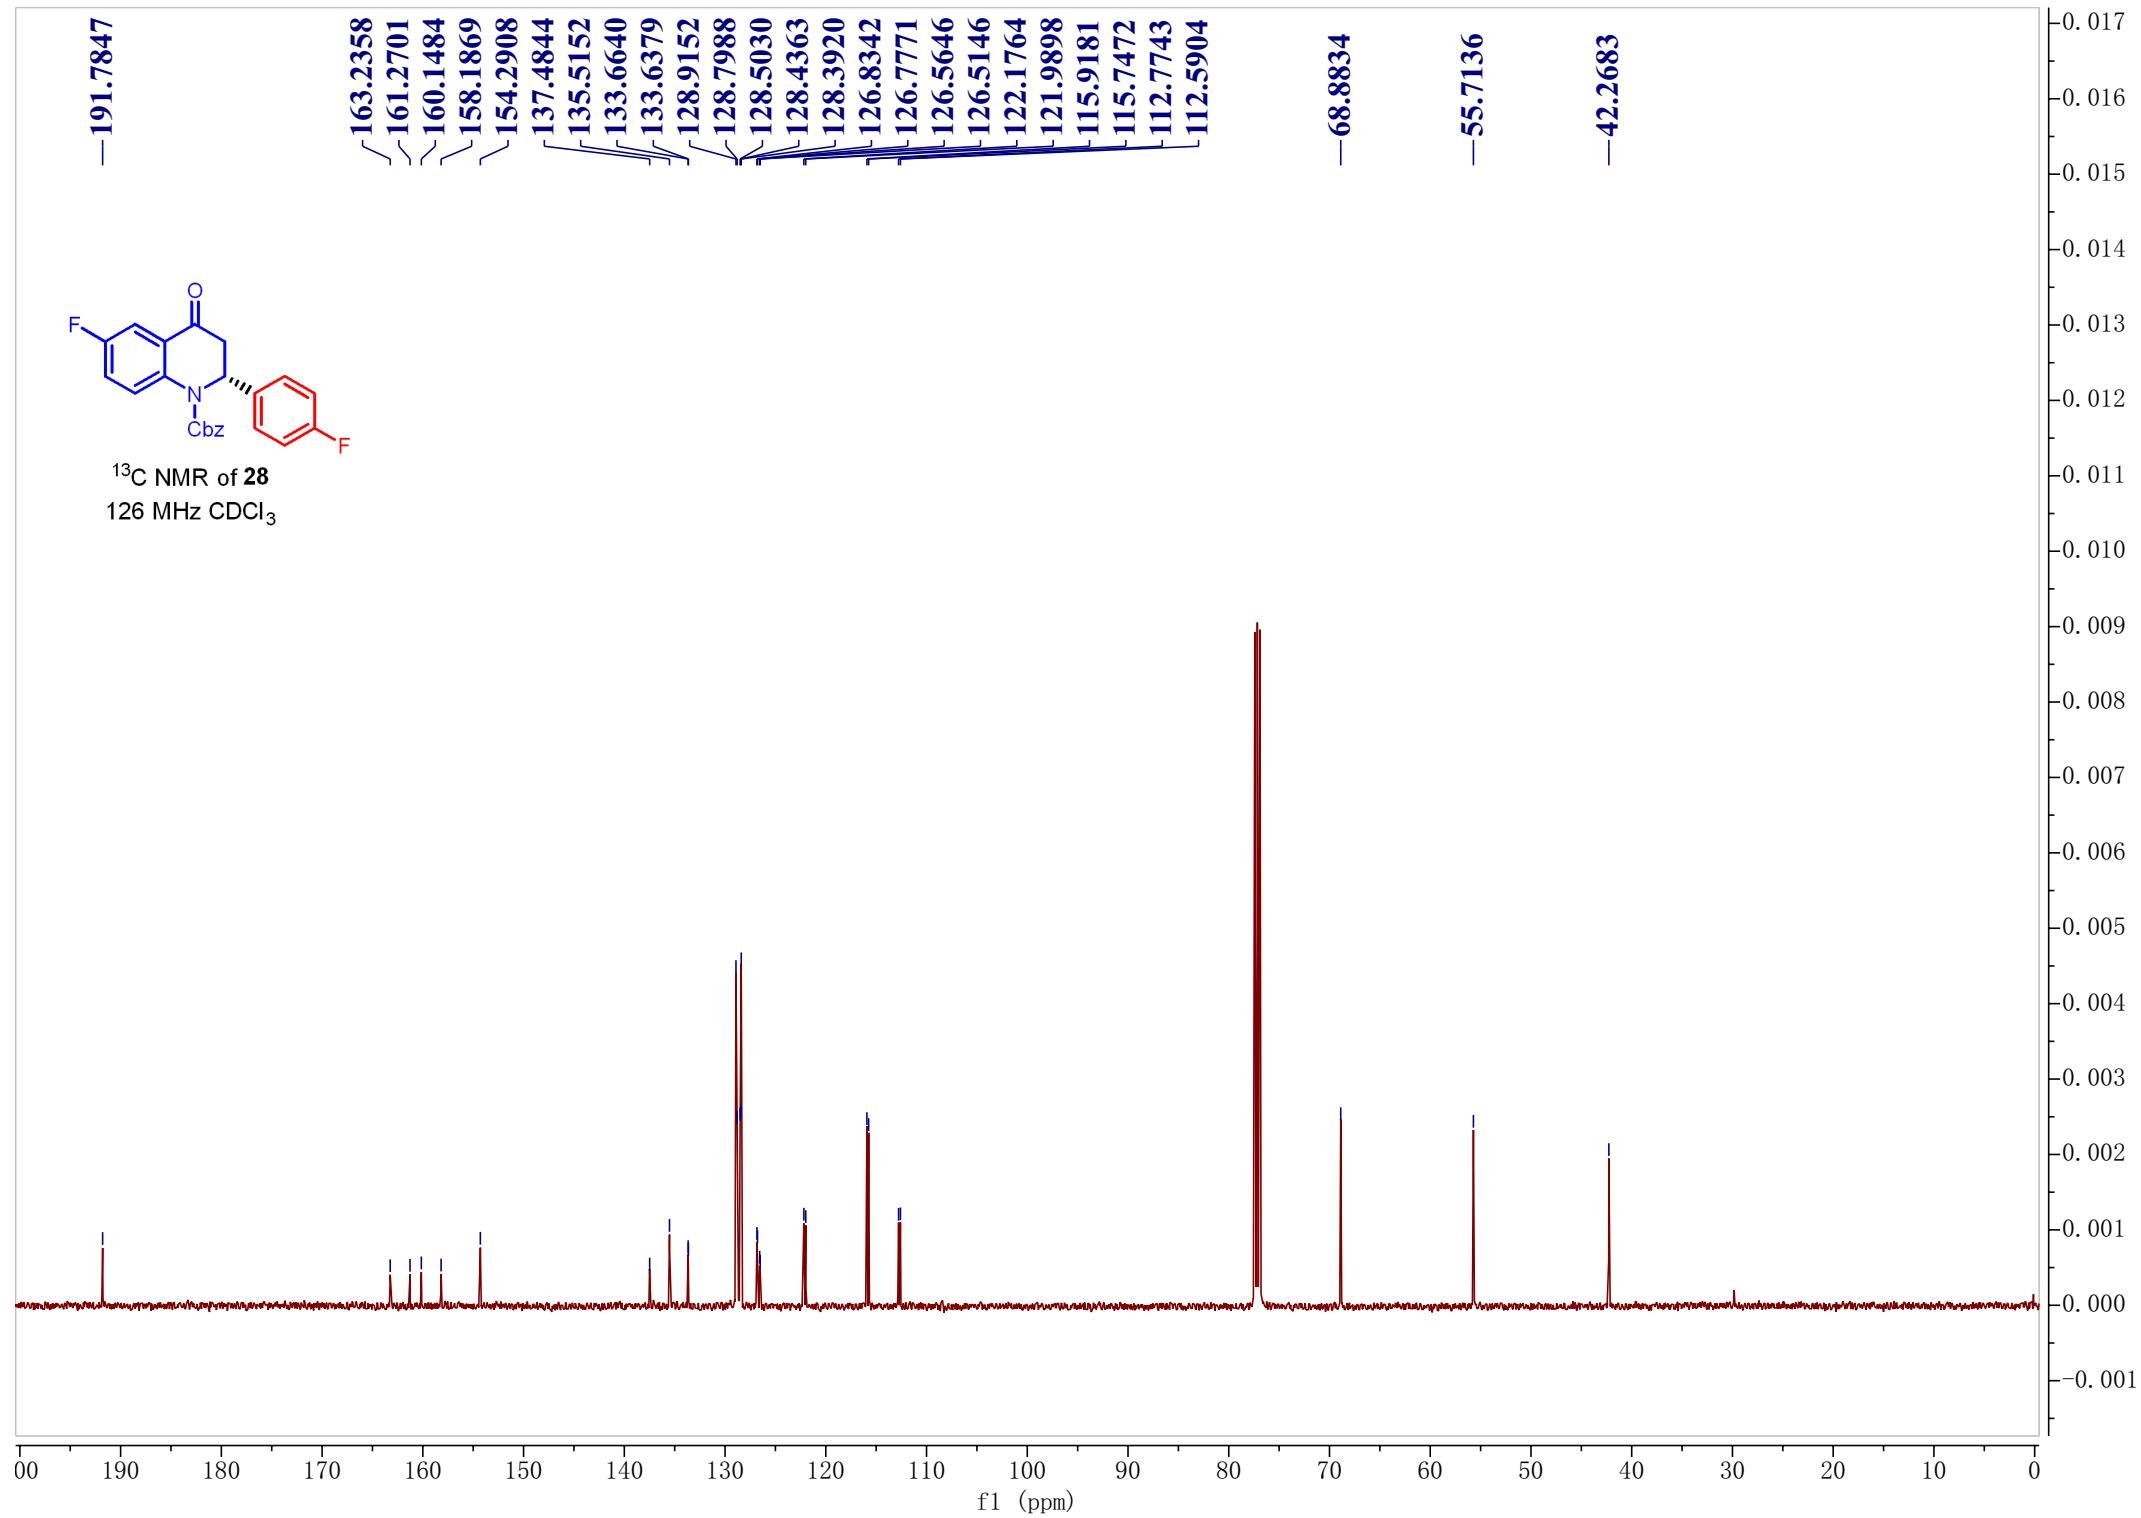

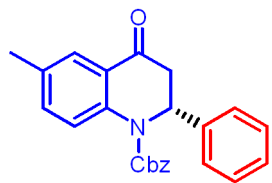

<sup>1</sup>H NMR of **29**  
500 MHz CDCl<sub>3</sub>

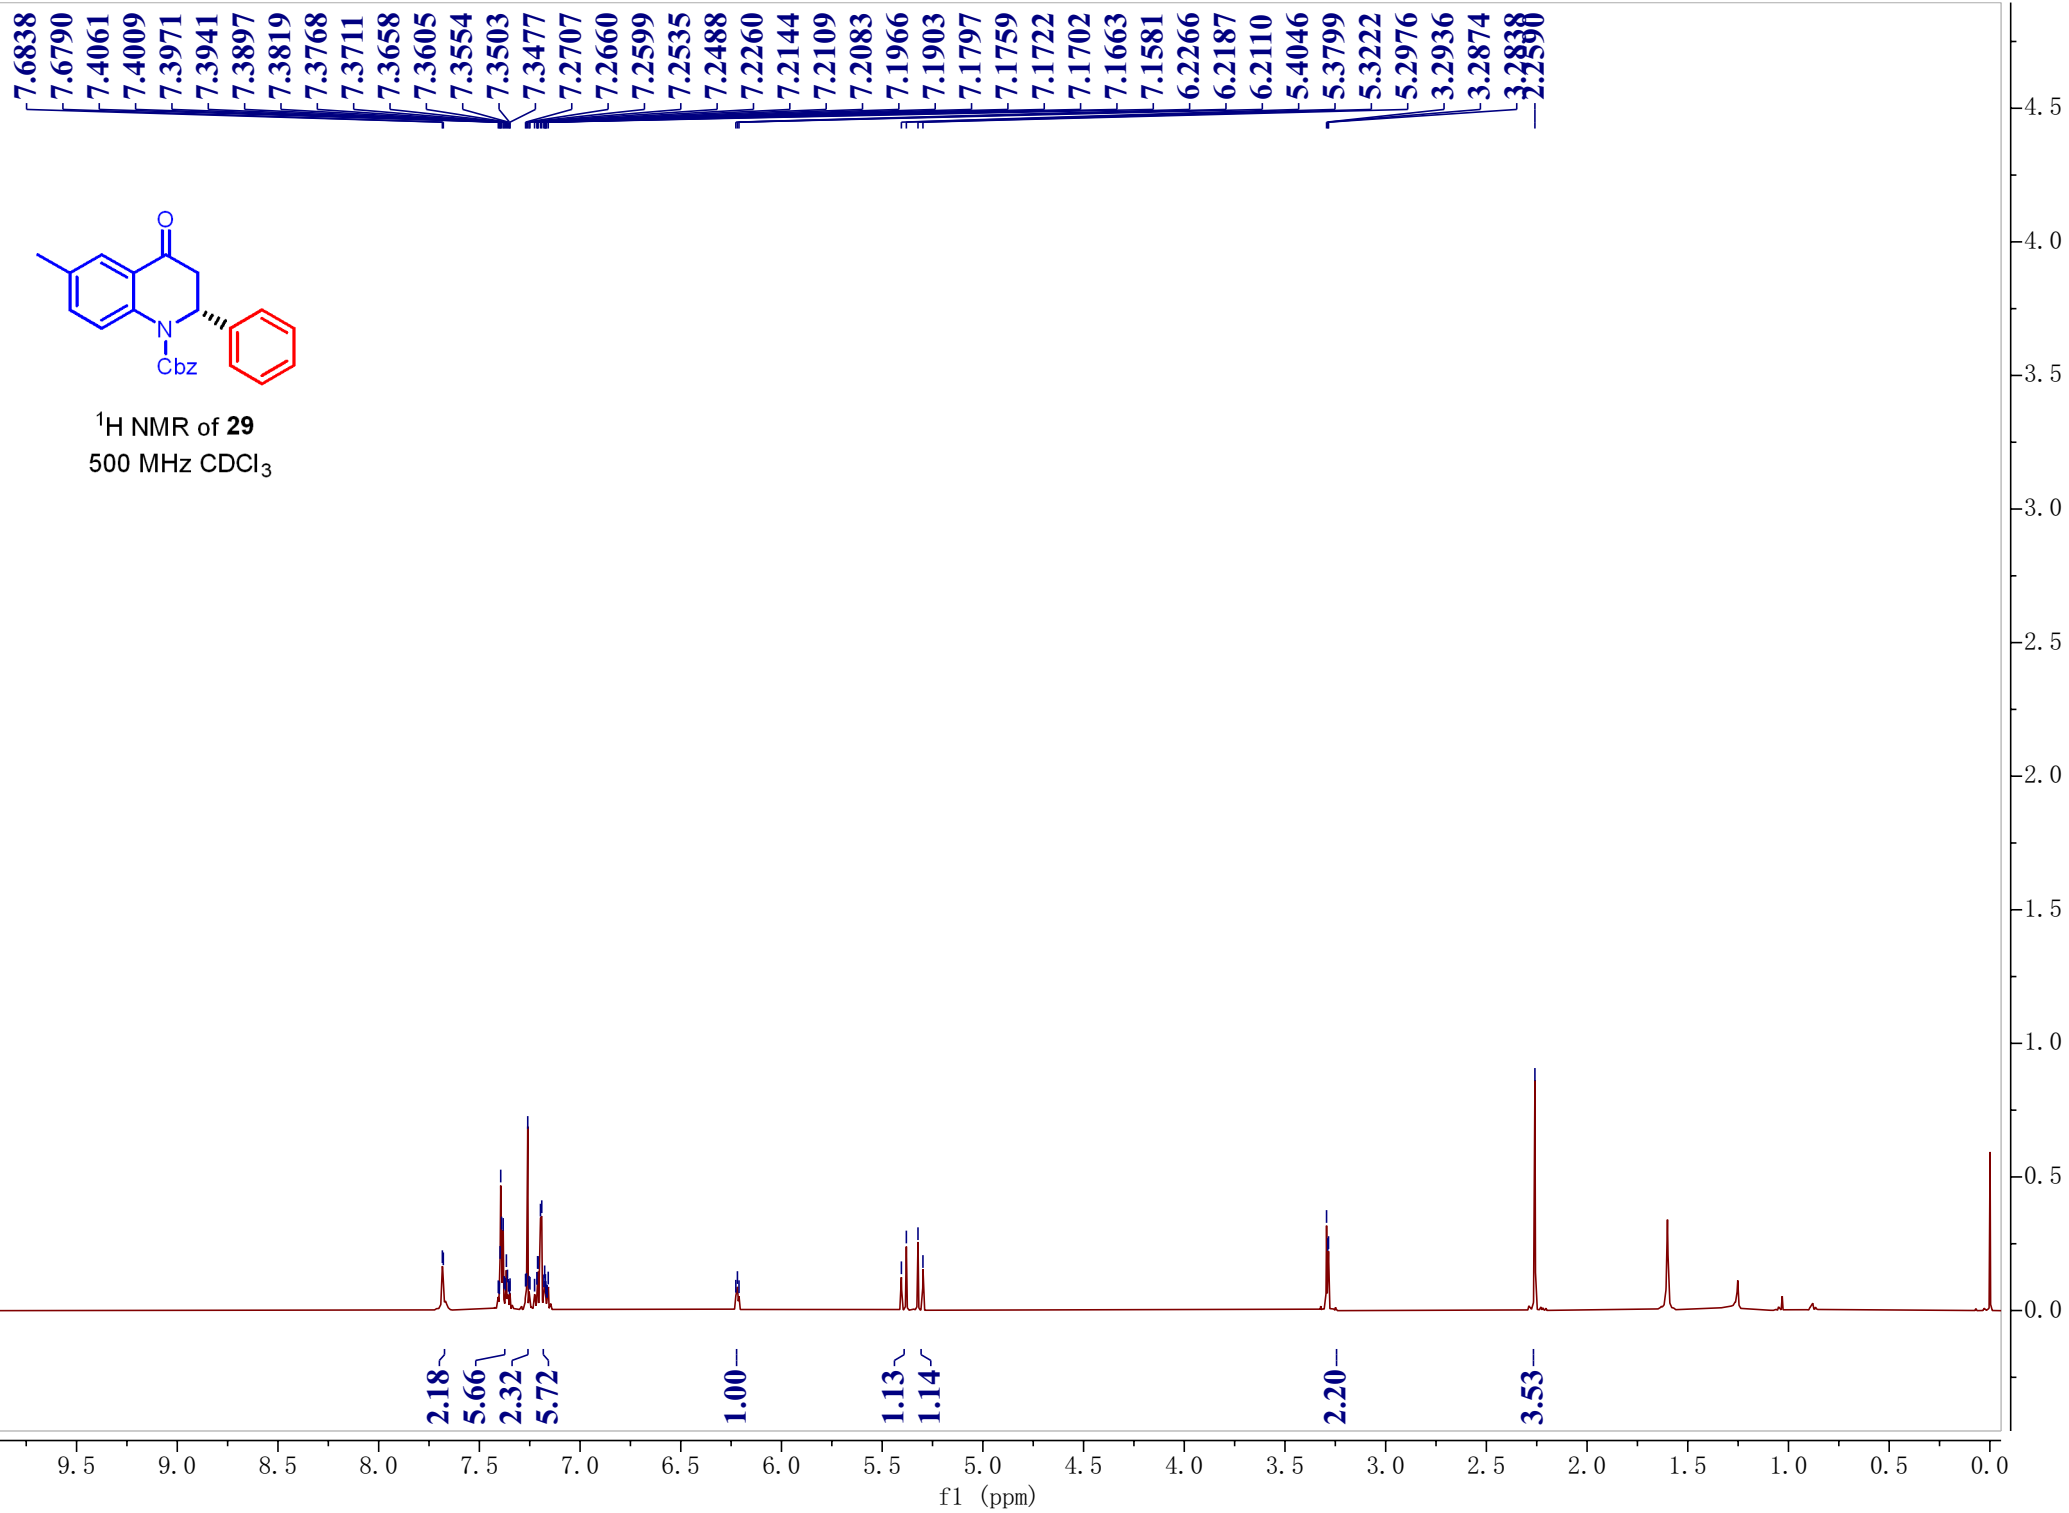

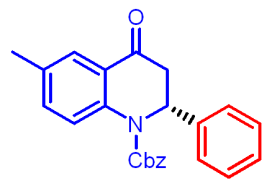

$^{13}\text{C}$  NMR of **29**  
126 MHz  $\text{CDCl}_3$

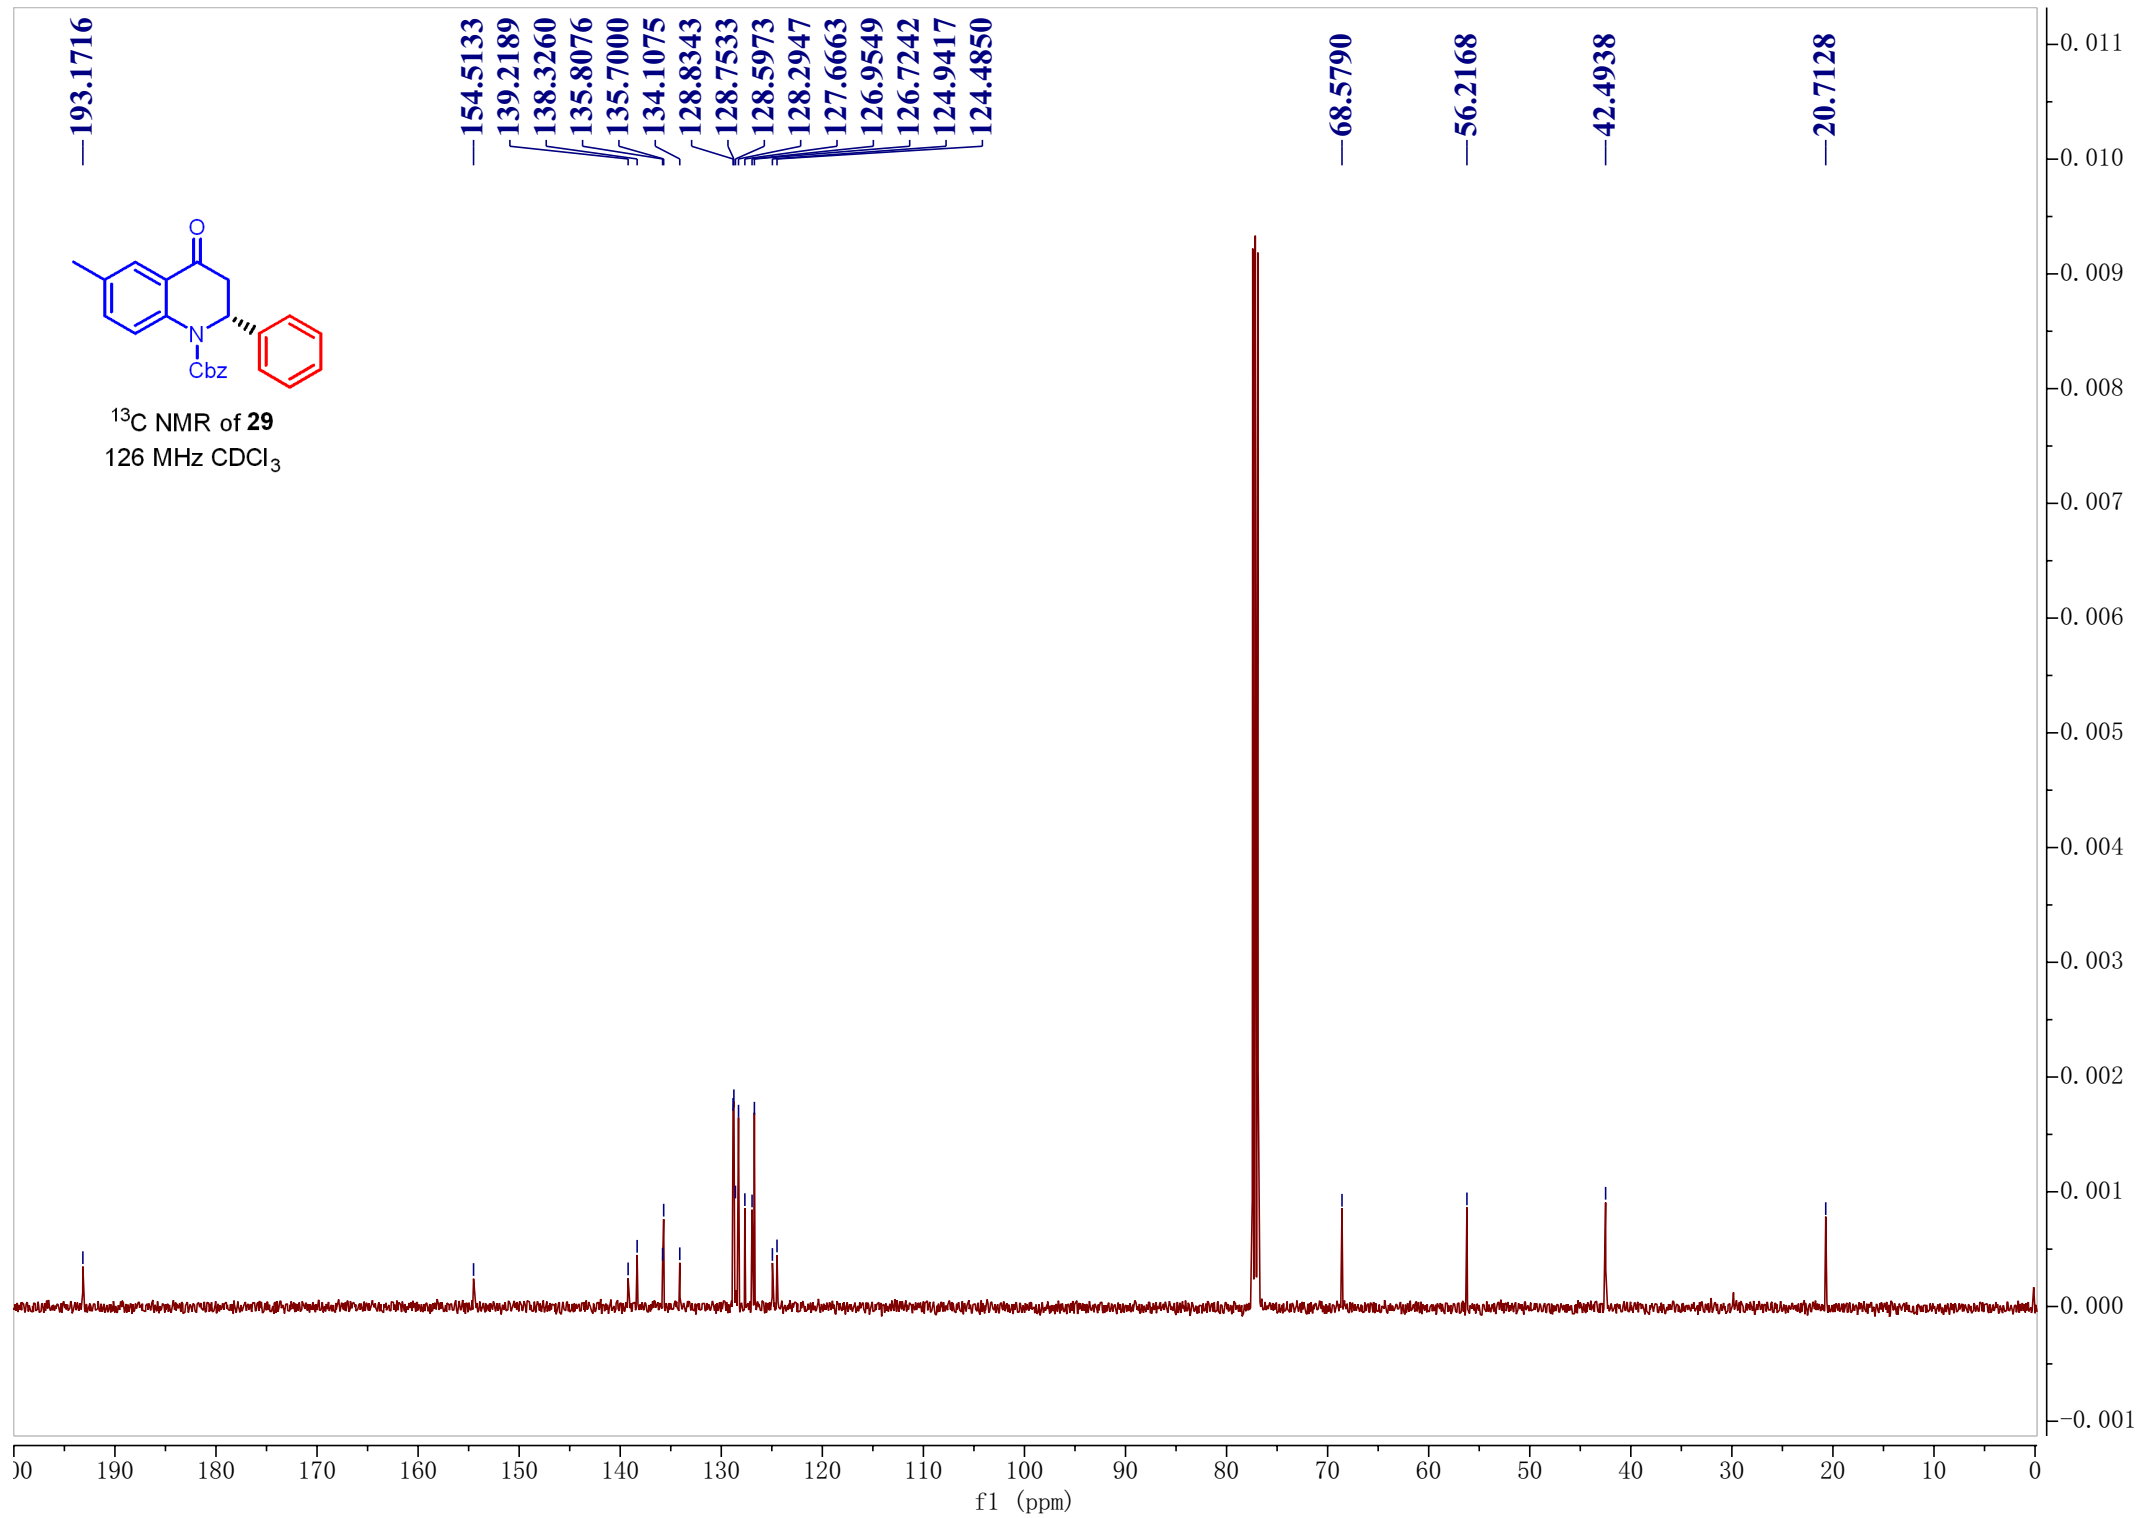

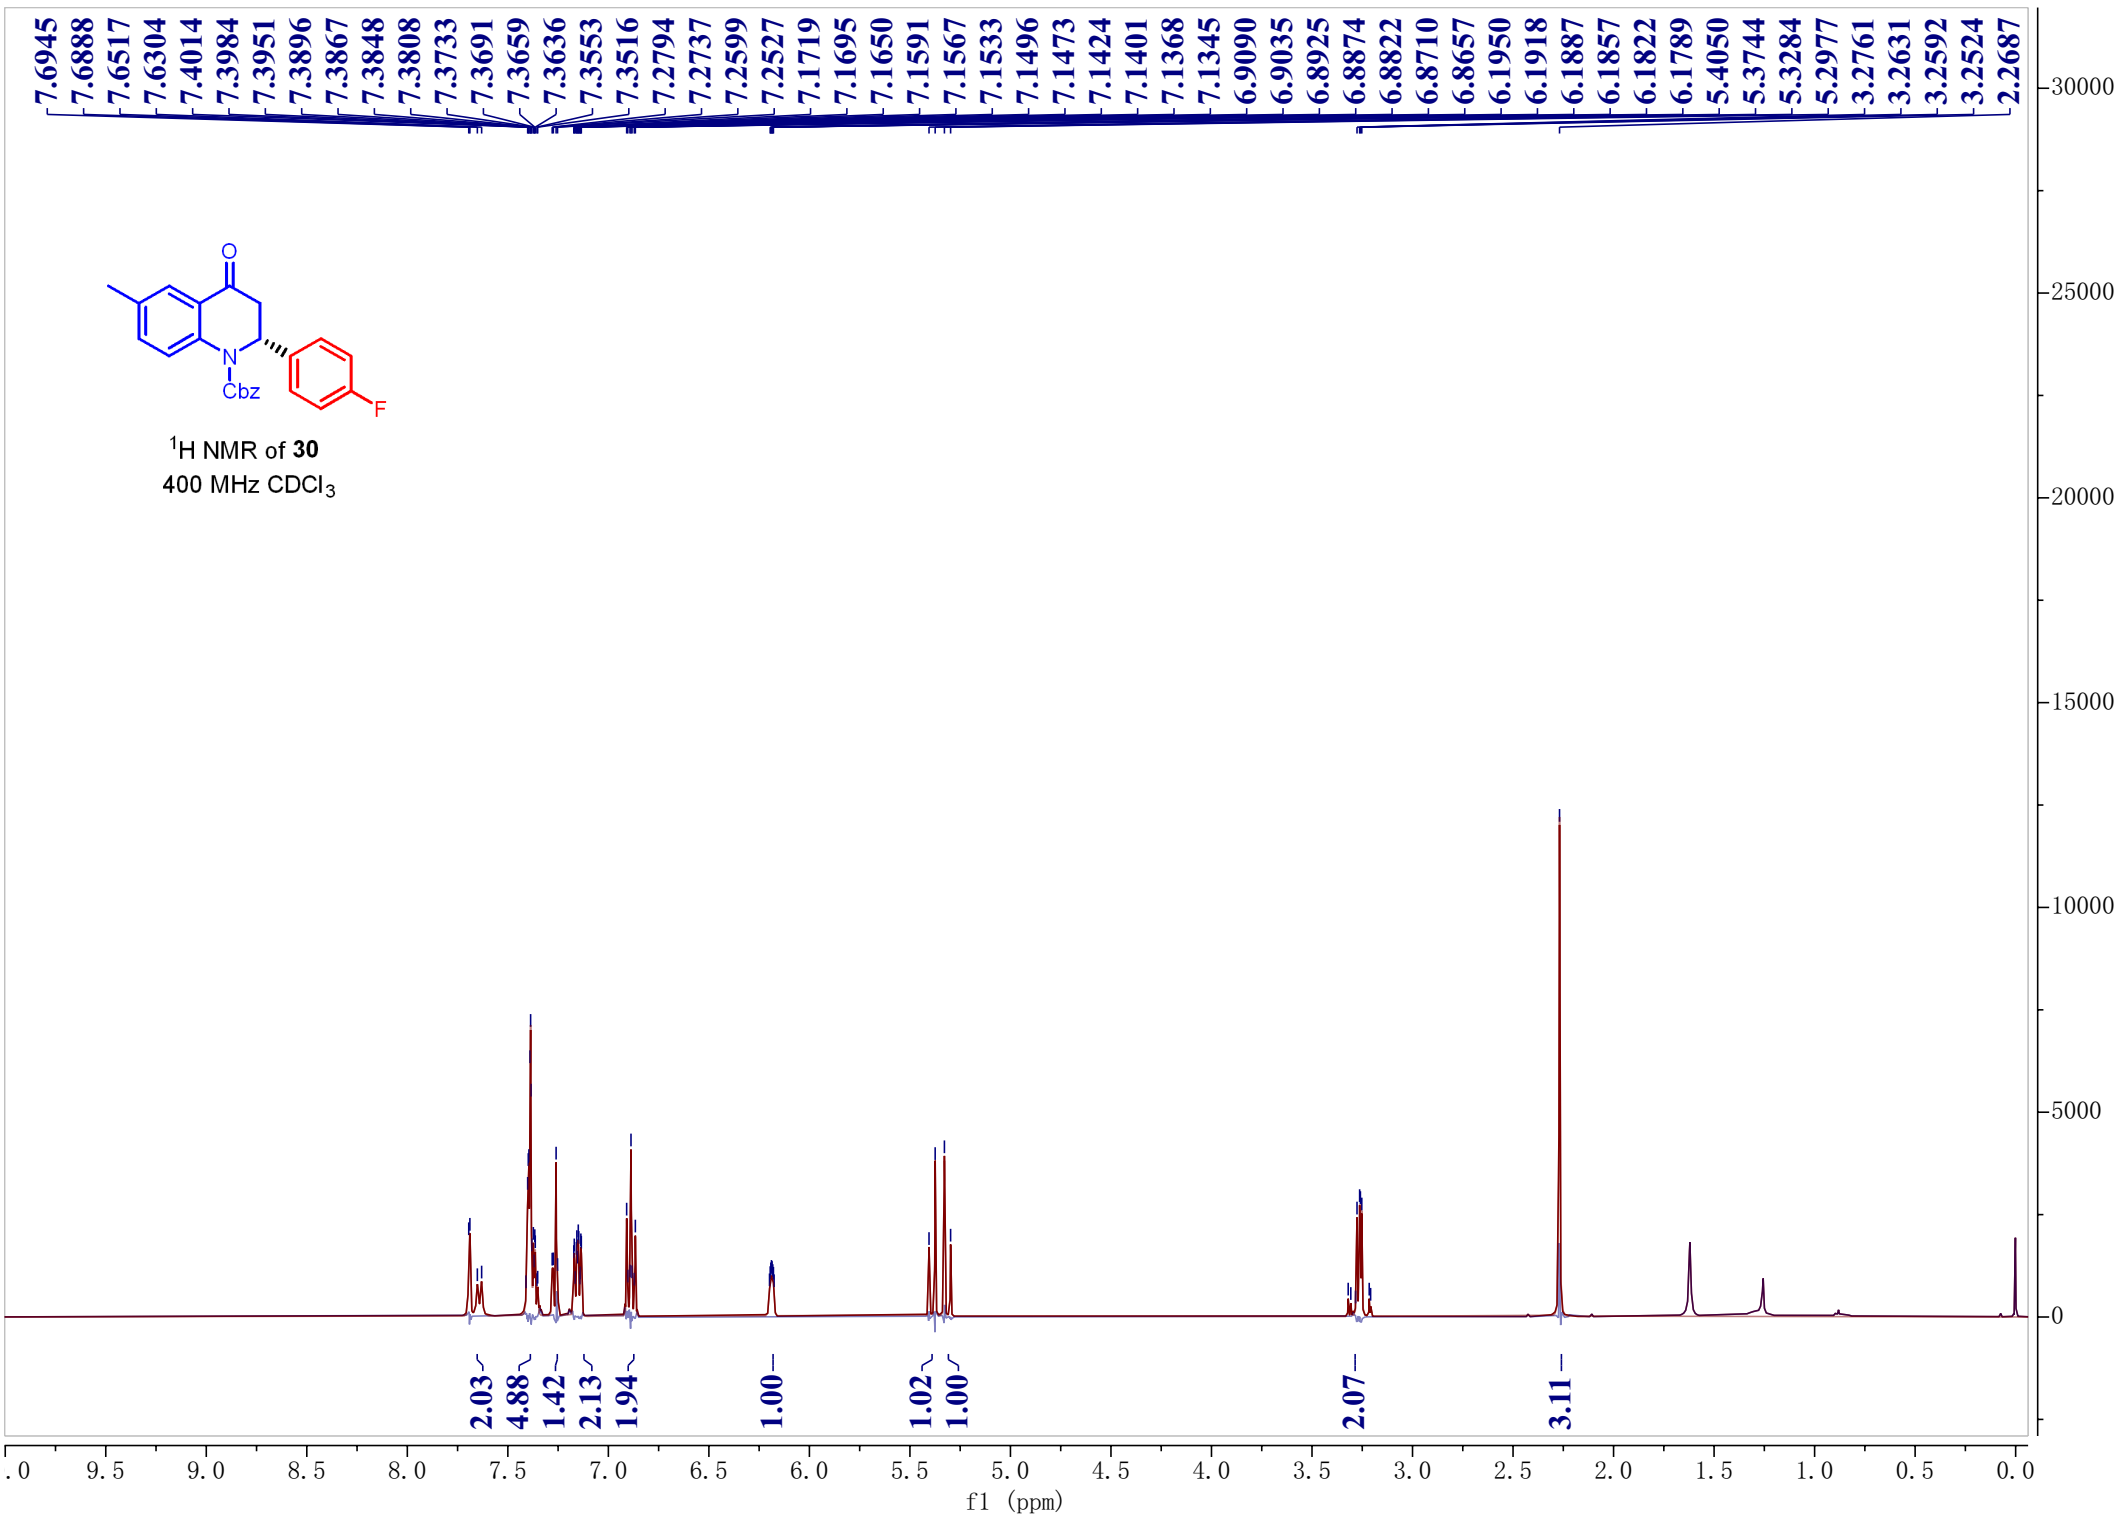

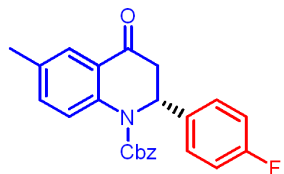

<sup>13</sup>C NMR of **30**  
101 MHz CDCl<sub>3</sub>

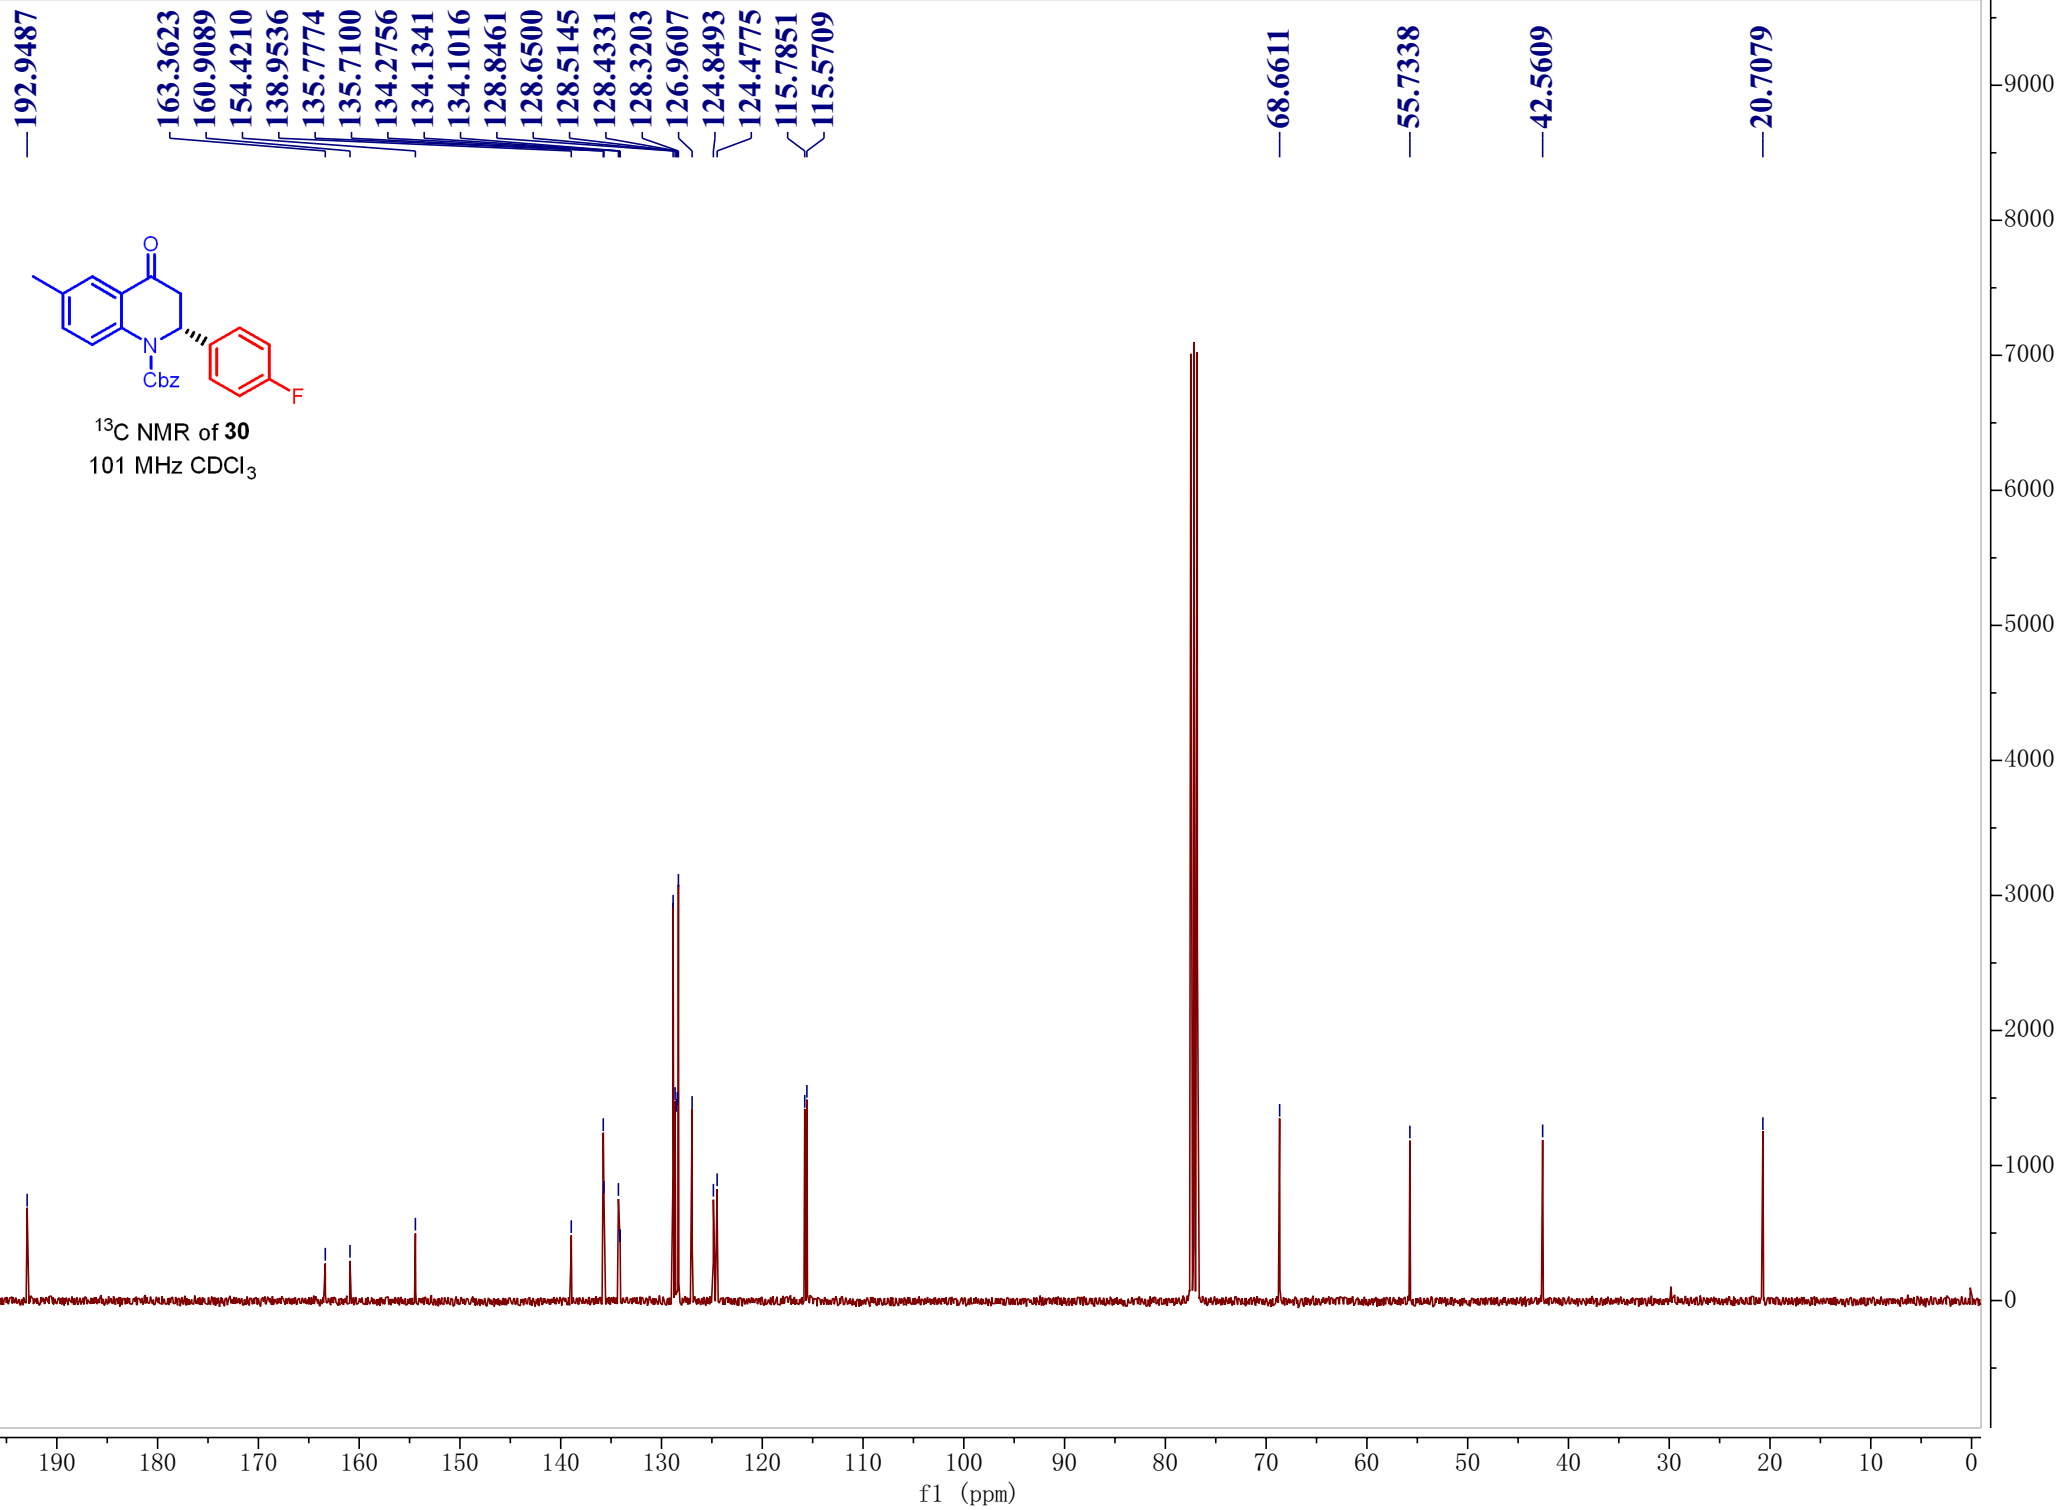



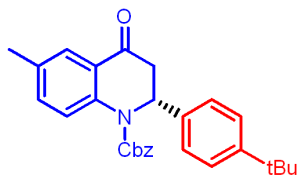

<sup>1</sup>H NMR of **31**  
400 MHz CDCl<sub>3</sub>

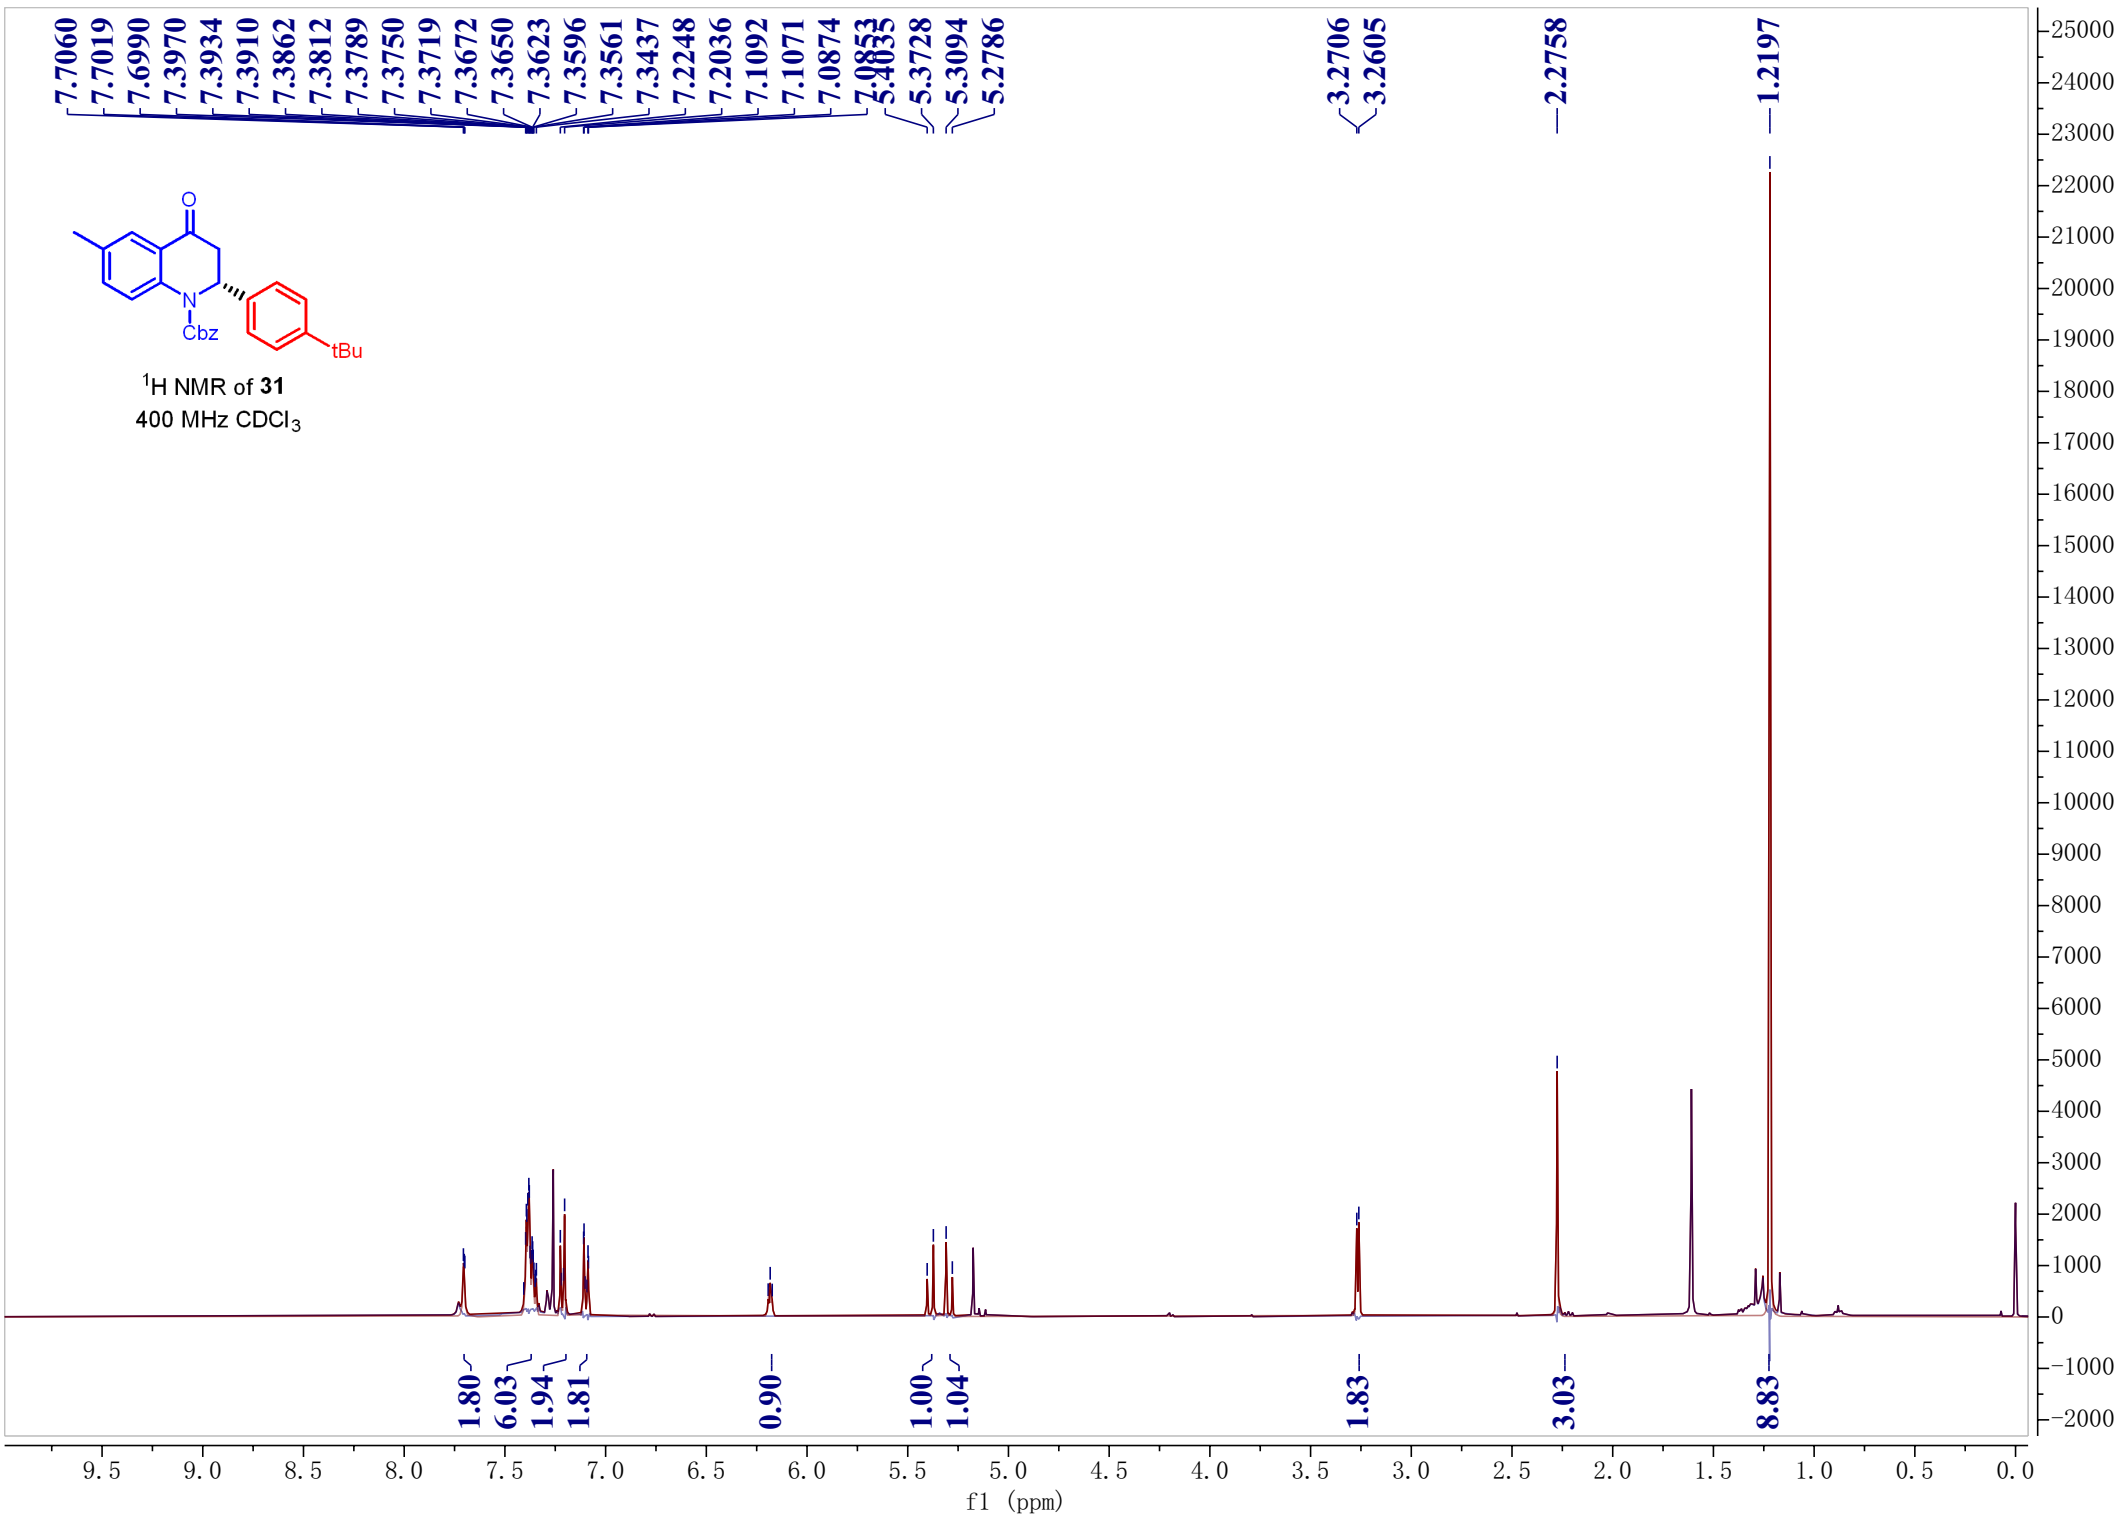

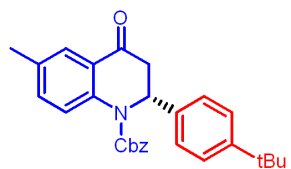

<sup>13</sup>C NMR of **31**  
101 MHz CDCl<sub>3</sub>

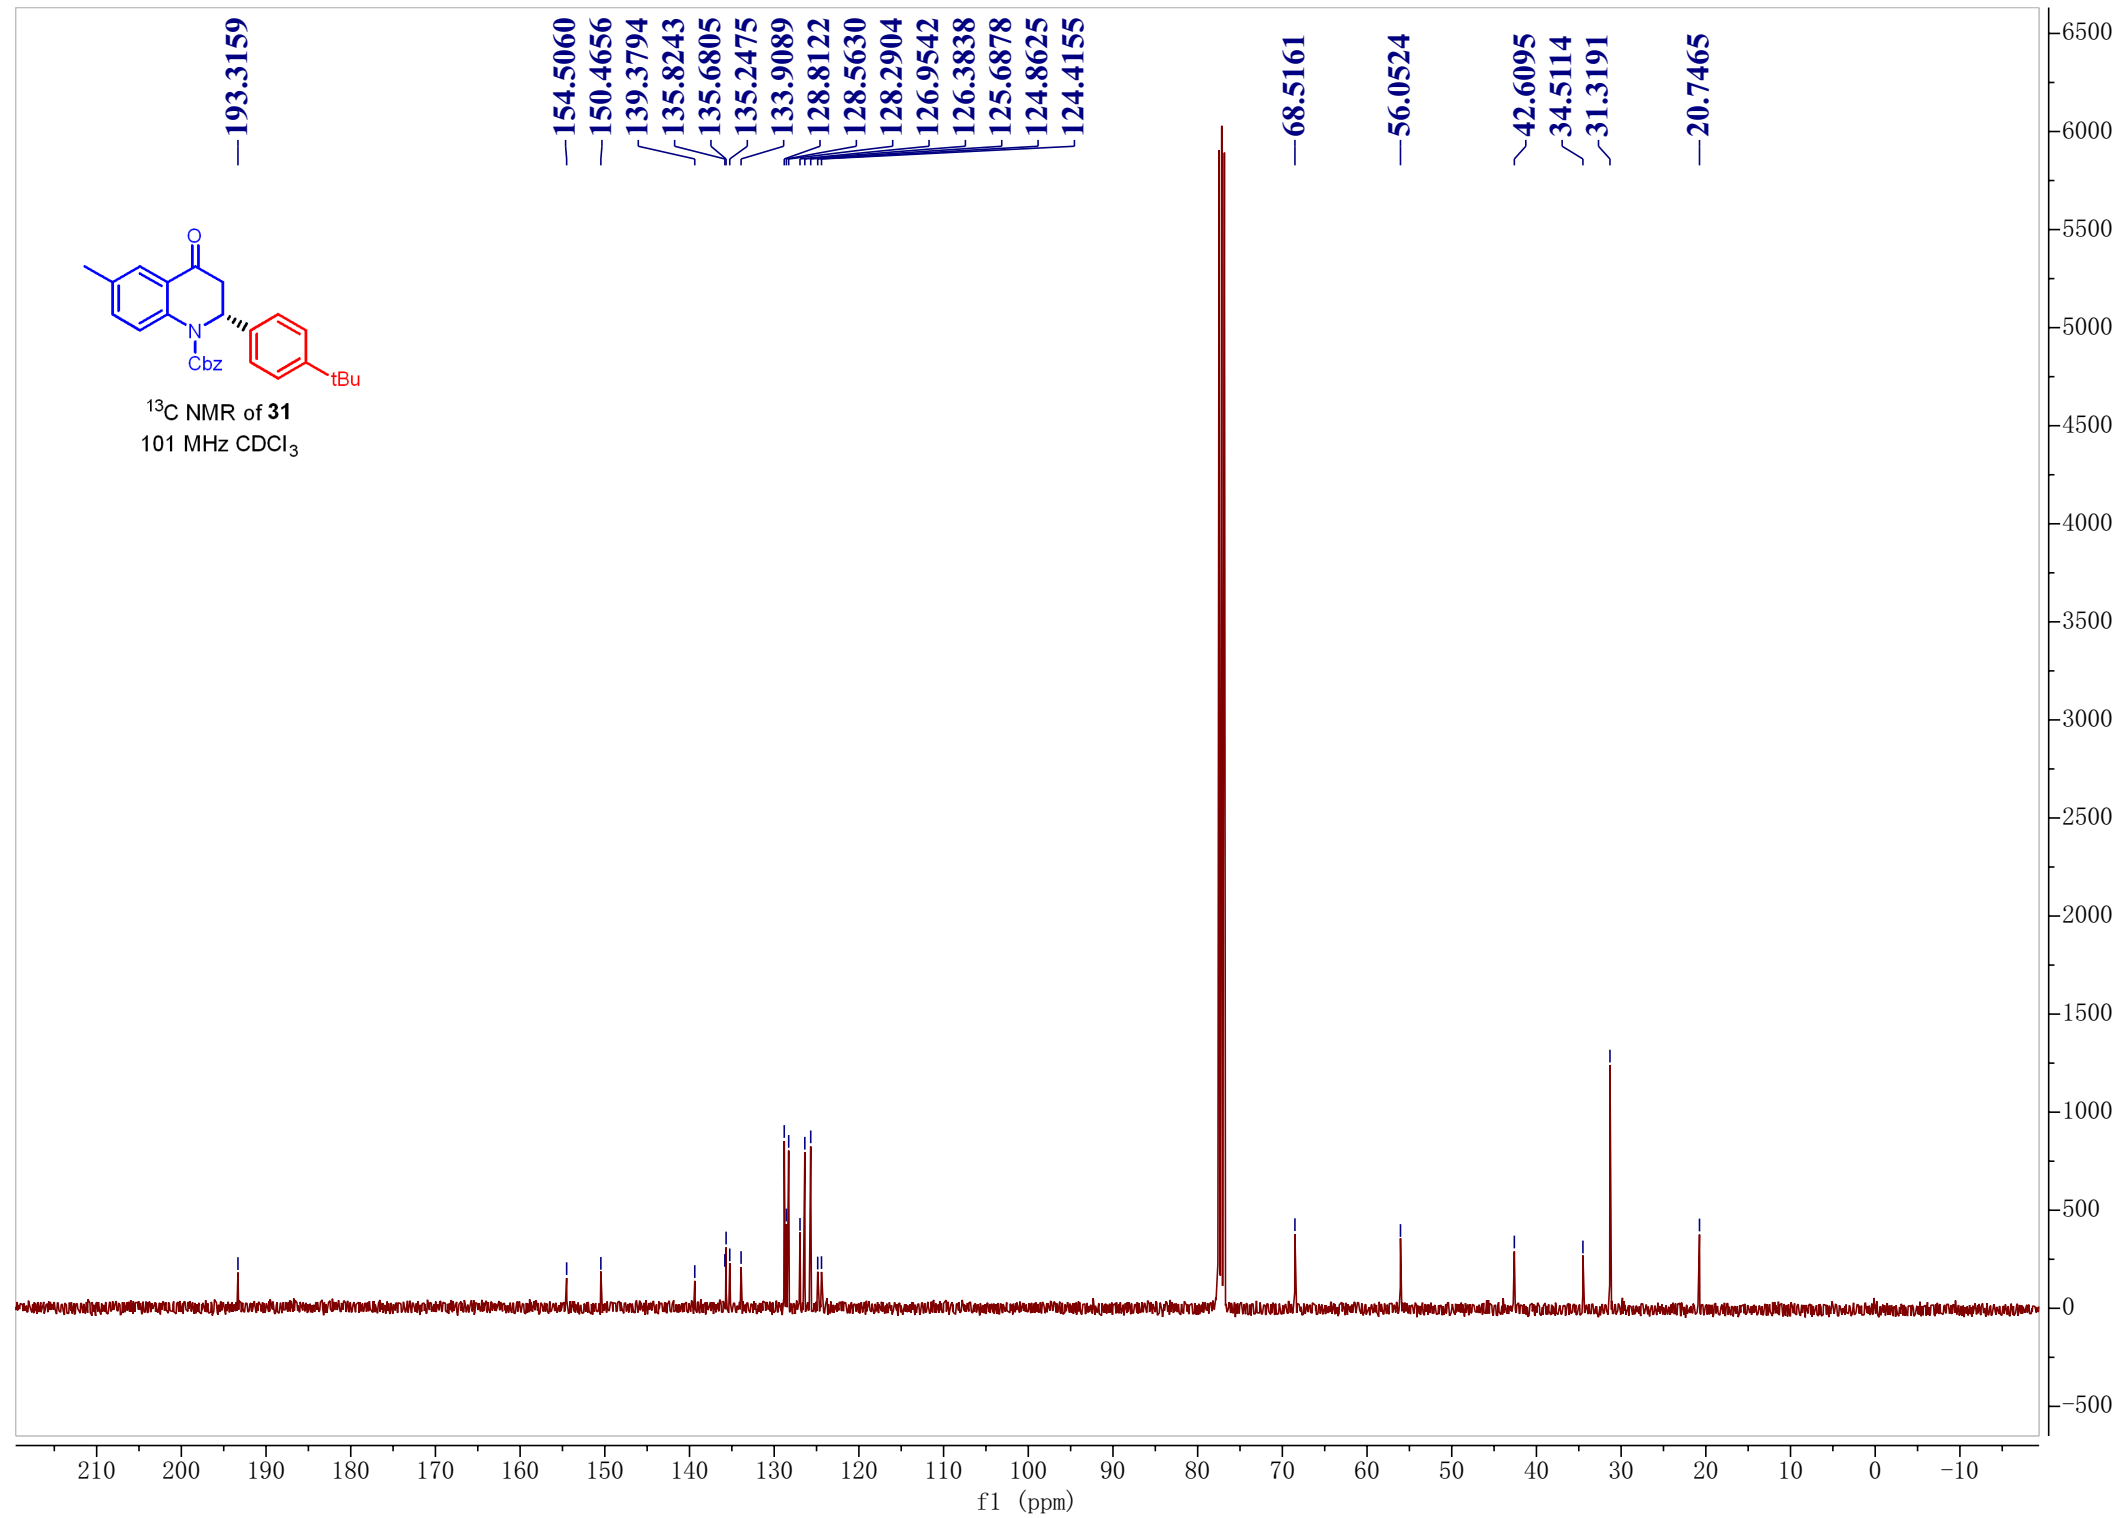

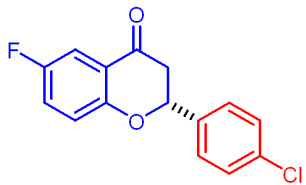

<sup>1</sup>H NMR of **32**  
500 MHz, CDCl<sub>3</sub>

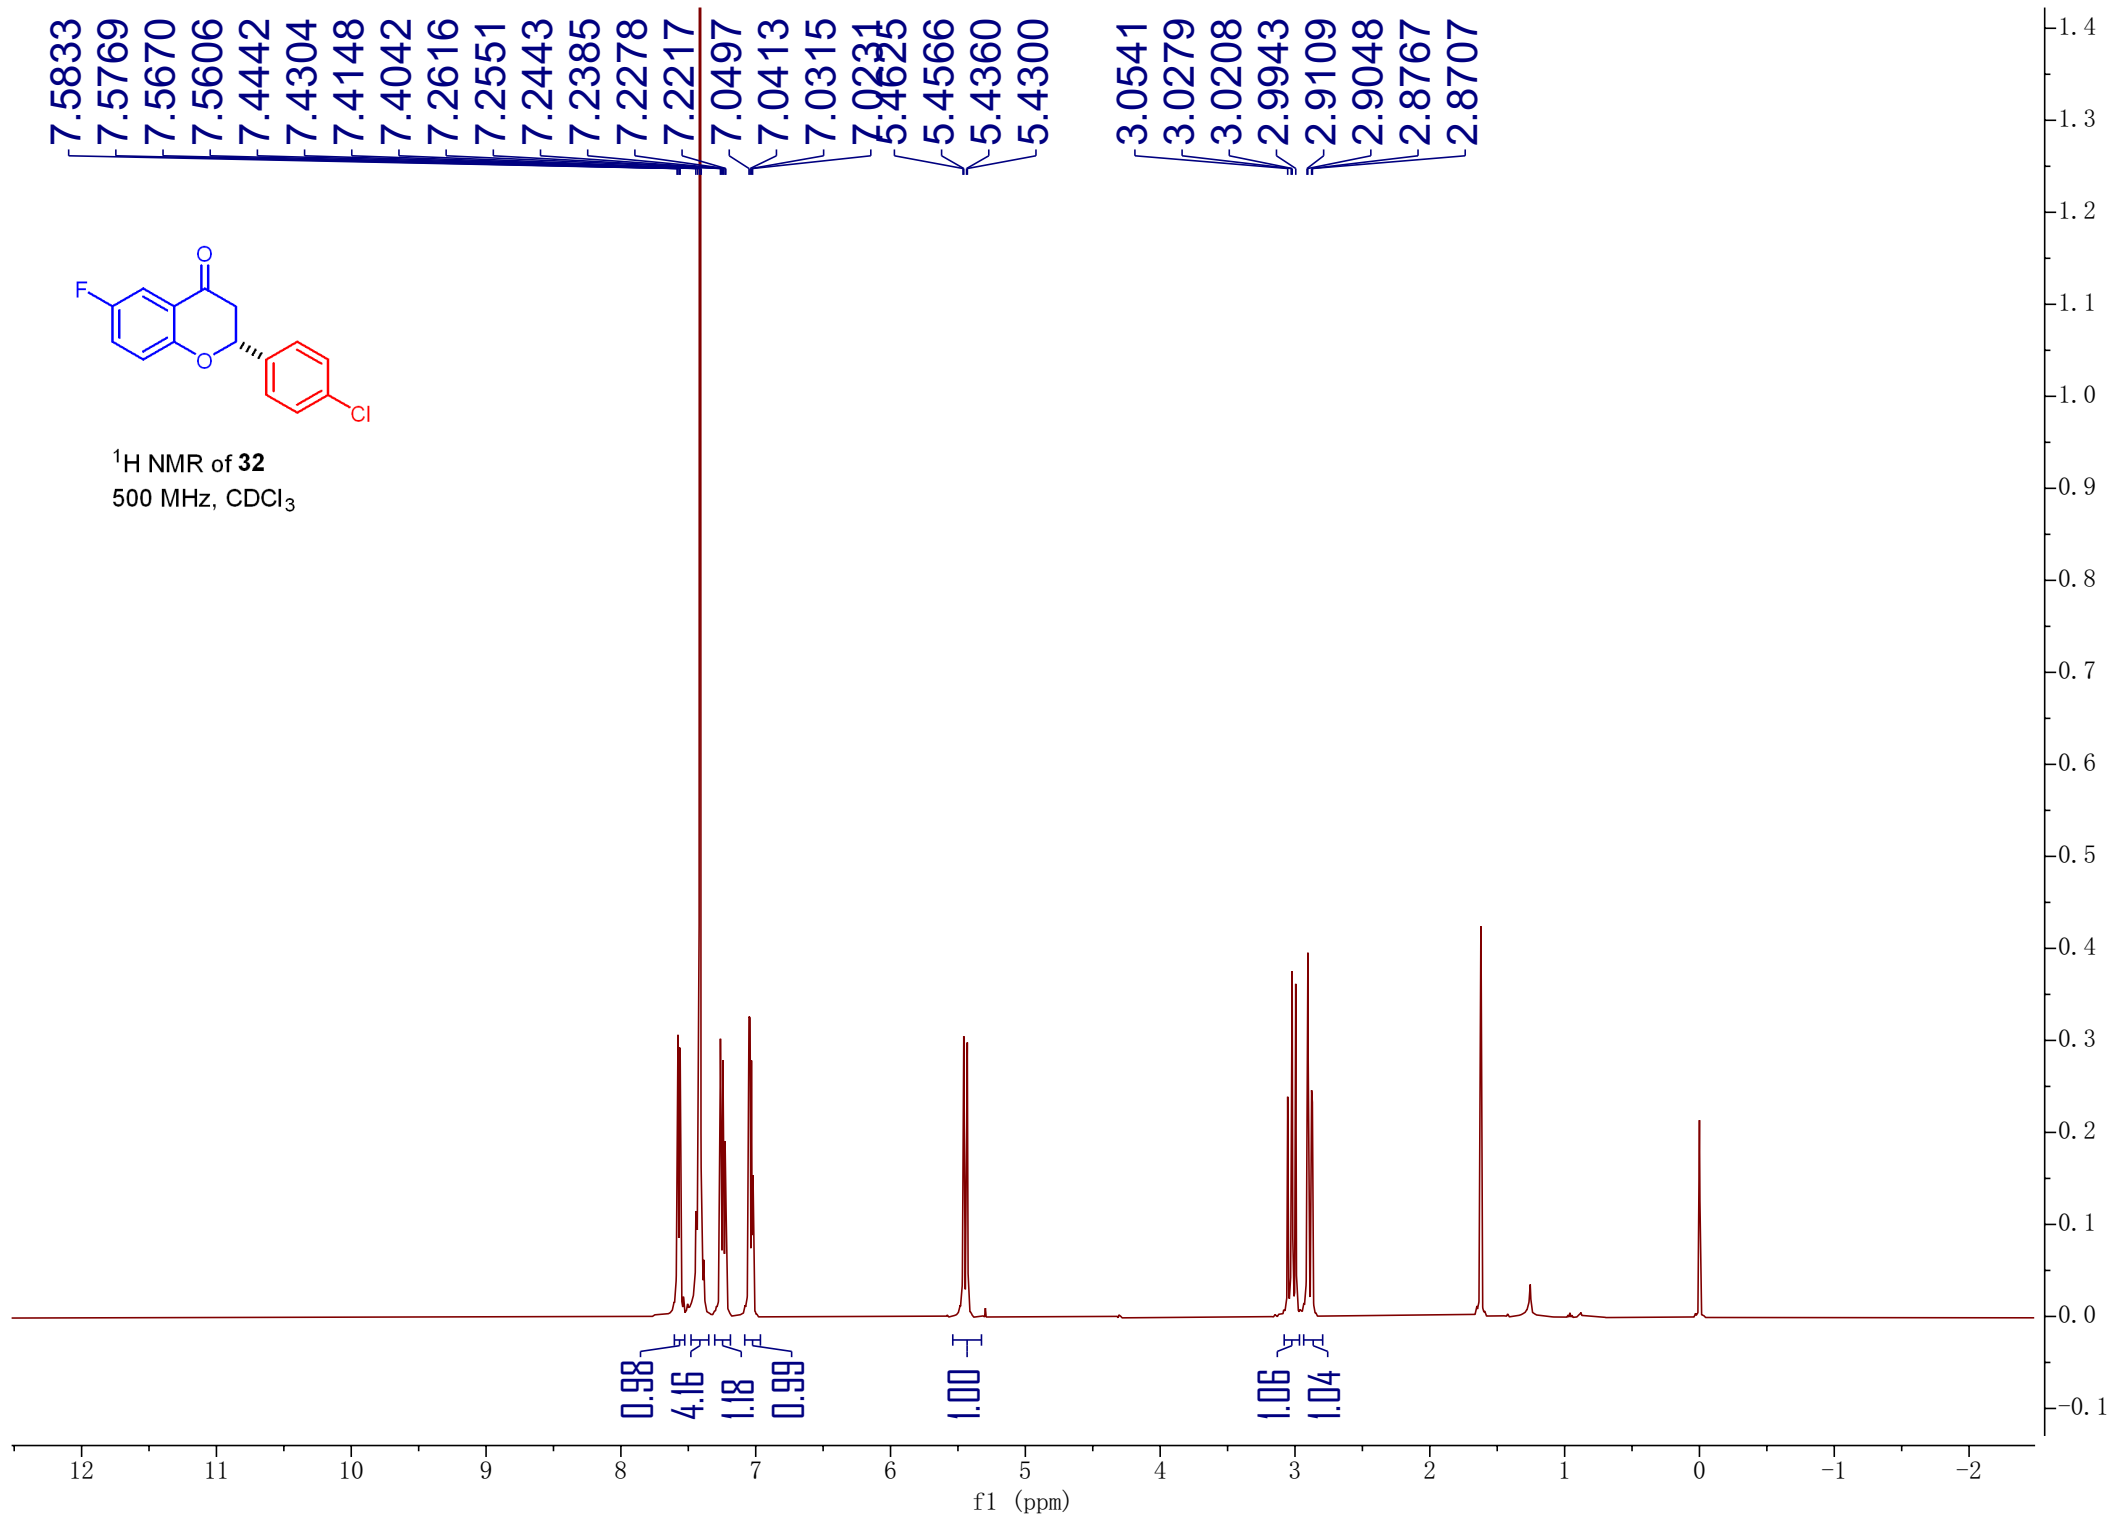

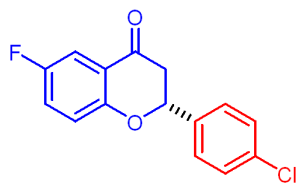

<sup>13</sup>C NMR of **32**  
126 MHz, CDCl<sub>3</sub>

—190.9028

158.5522

157.6680

156.6226

137.0888

134.8707

129.2359

127.6328

124.0526

123.8598

121.5160

121.4607

119.9724

119.9145

112.3139

112.1293

79.1960

—44.4114

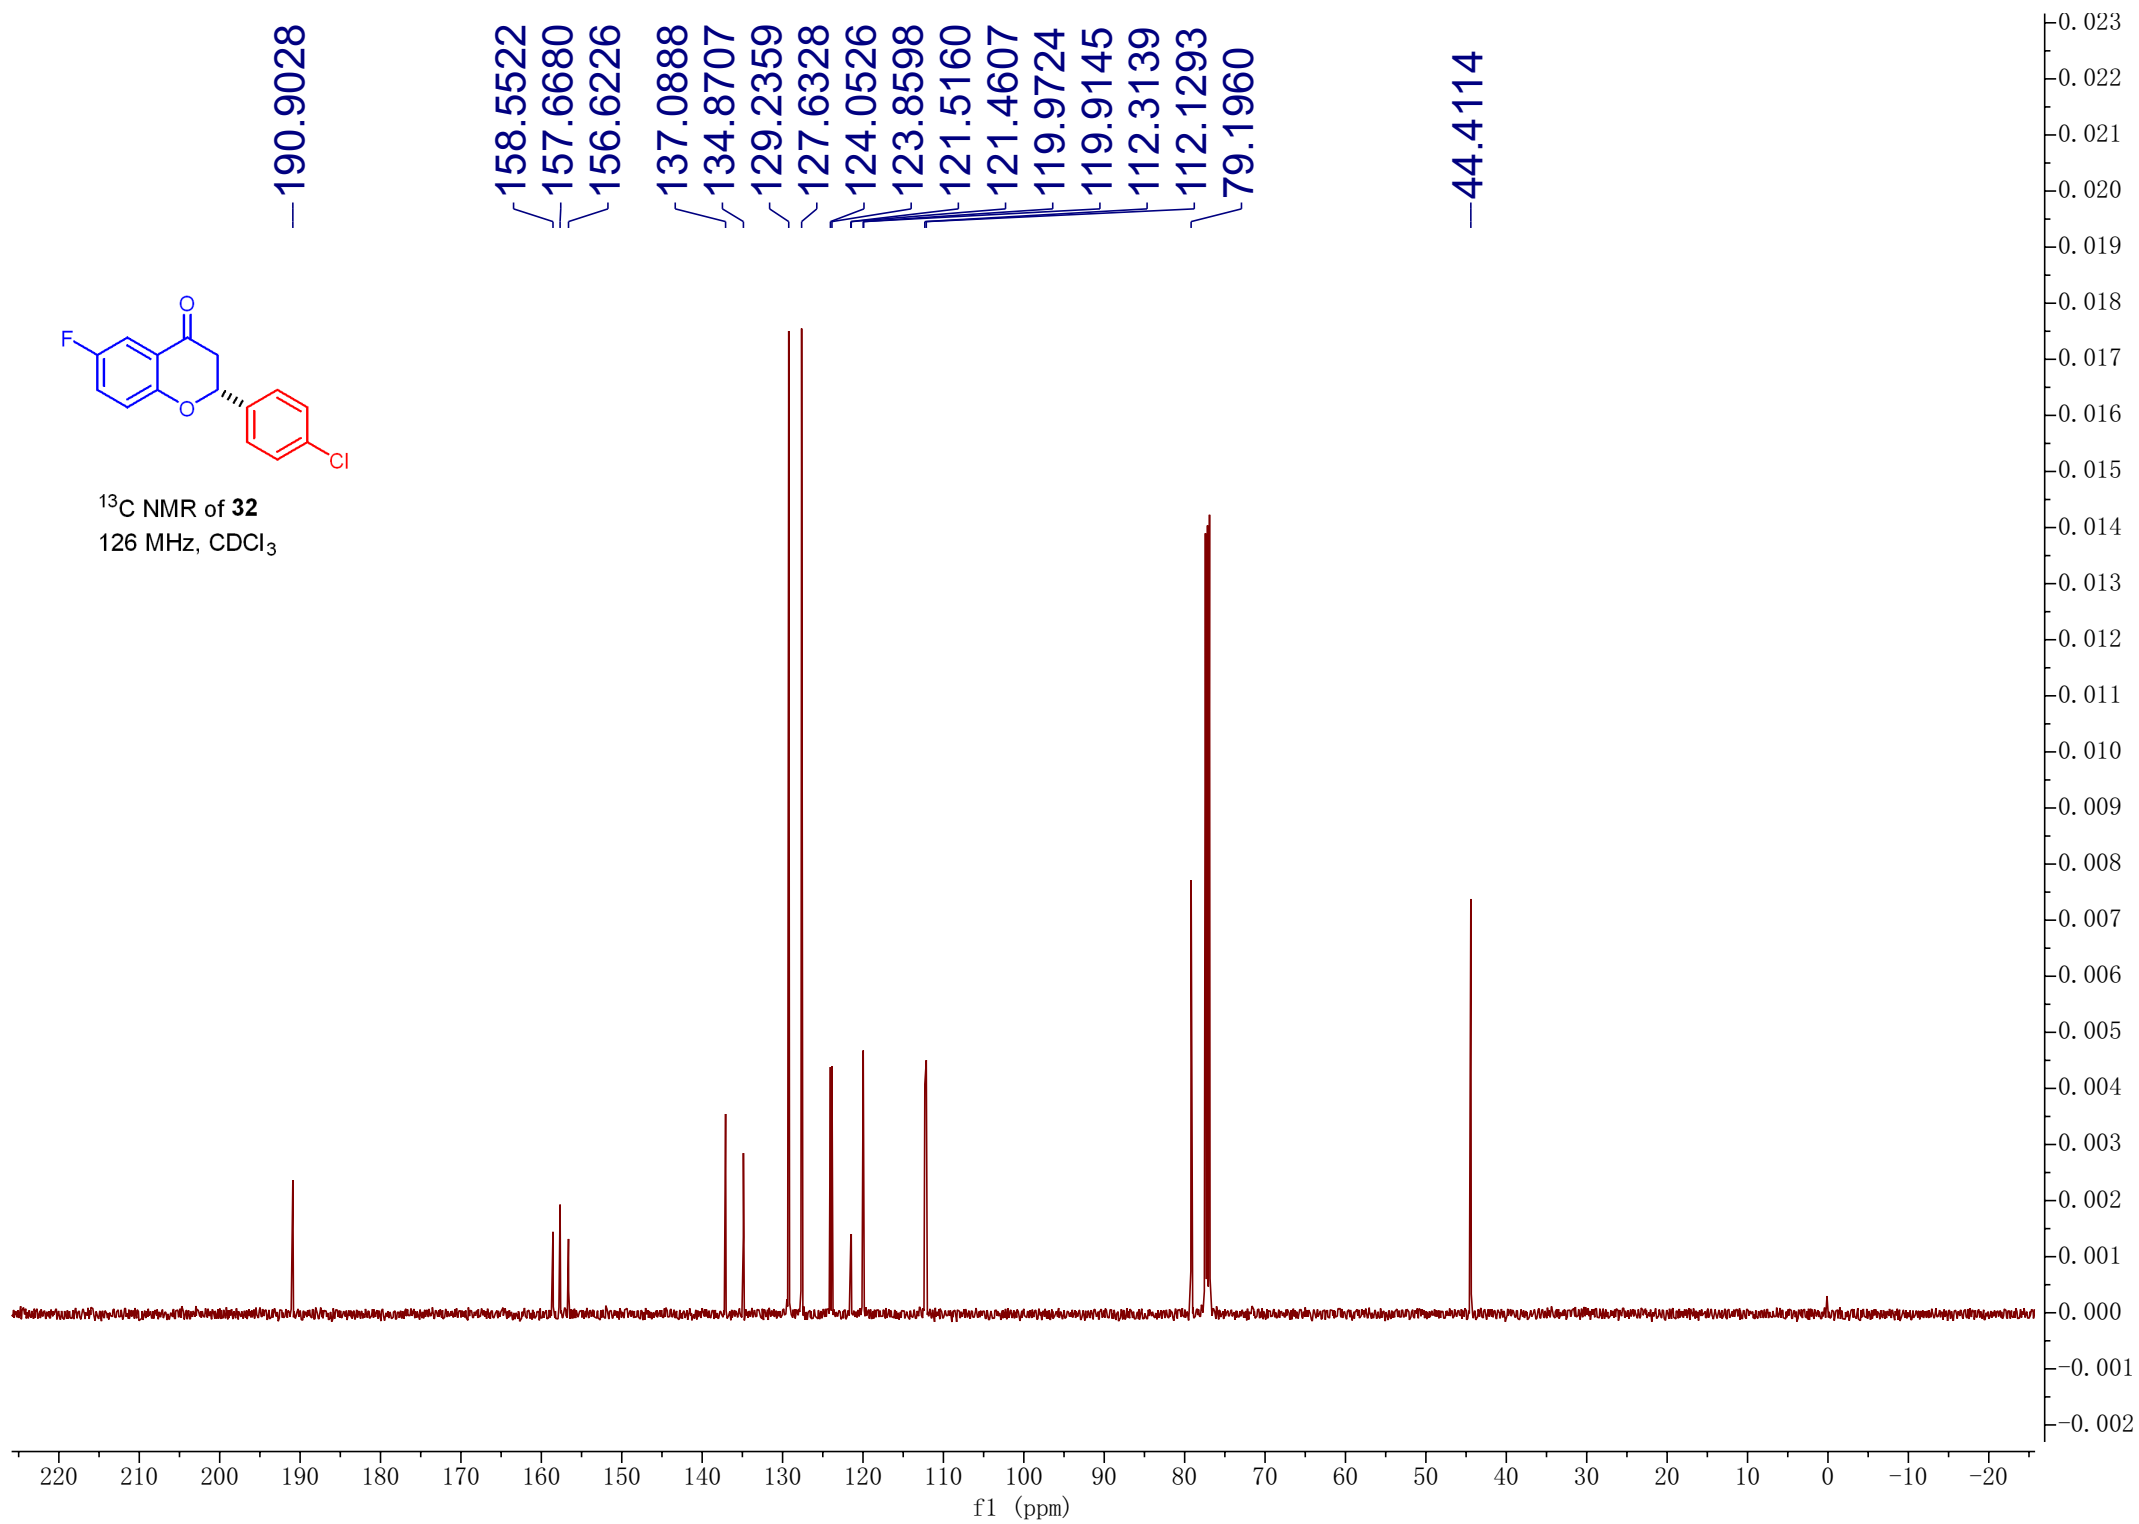

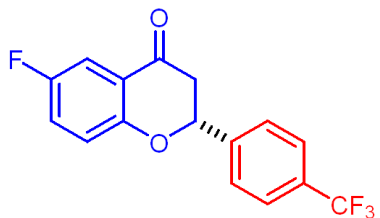

<sup>1</sup>H NMR of **33**  
500 MHz, CDCl<sub>3</sub>

7.7050  
7.6889  
7.6065  
7.5904  
7.5870  
7.5800  
7.5699  
7.5641  
7.2686  
7.2618  
7.2471  
7.2353  
7.2286  
7.0647  
7.0558  
7.0464  
7.0384  
6.9415  
5.5350  
5.5153  
5.5089

3.0508  
3.0245  
3.0165  
2.9903  
2.9431  
2.9364  
2.9089  
2.9026

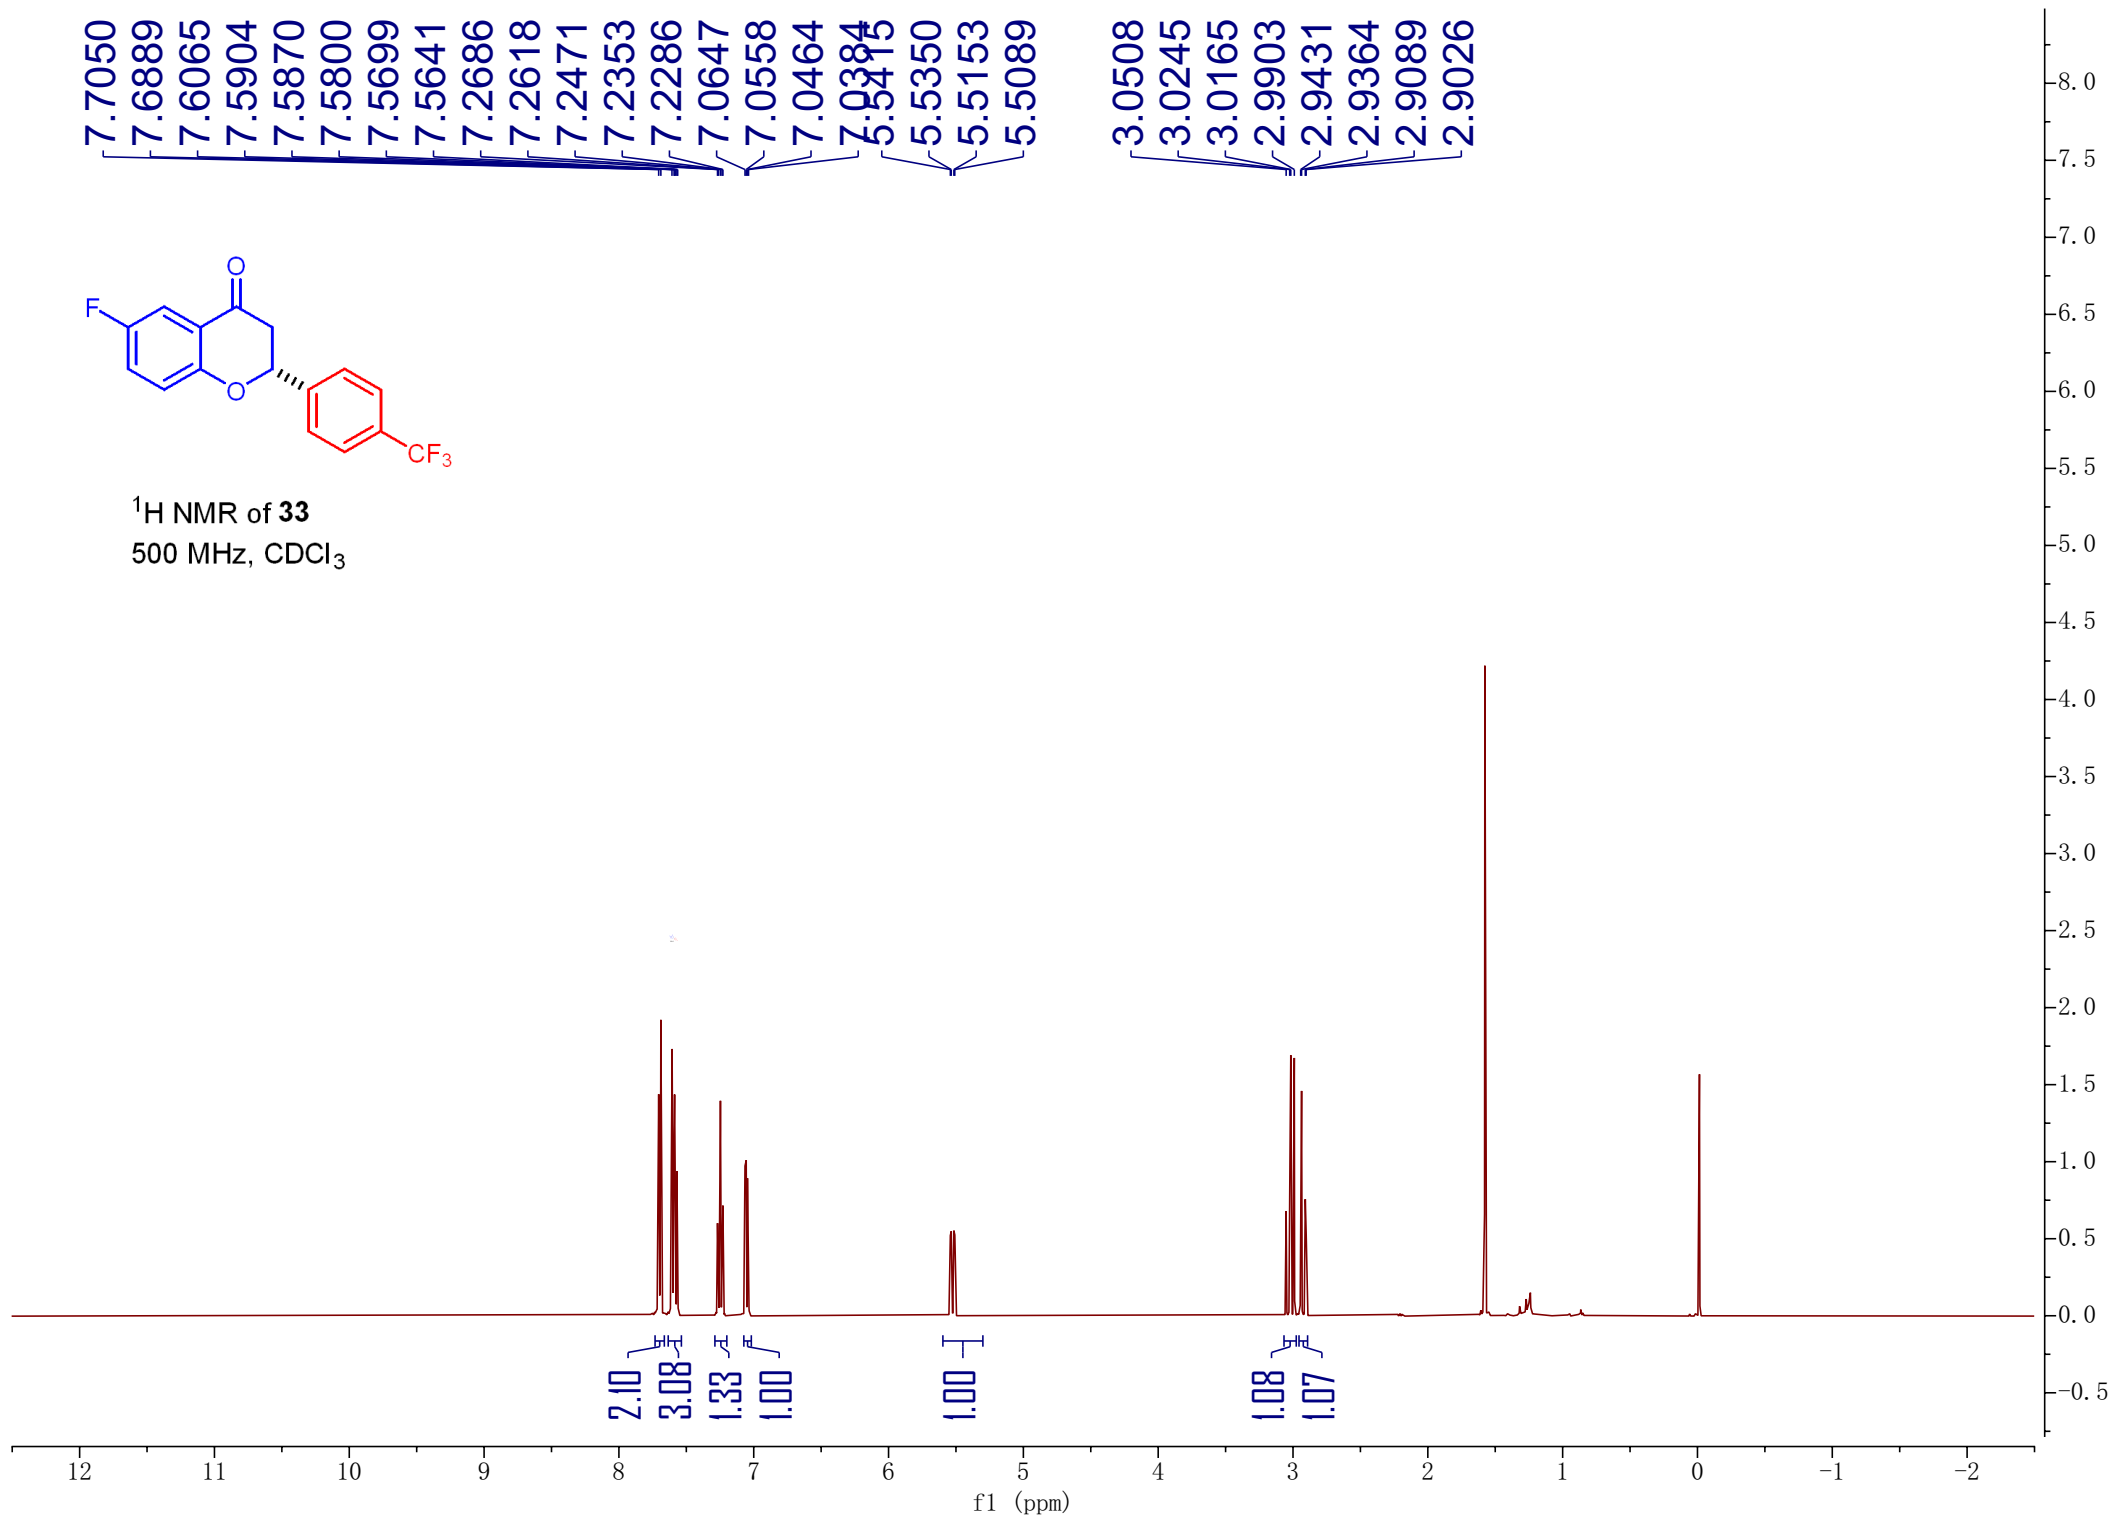

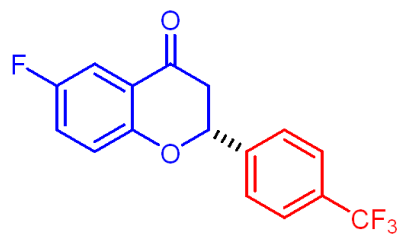

$^{13}\text{C}$  NMR of **33**  
126 MHz,  $\text{CDCl}_3$

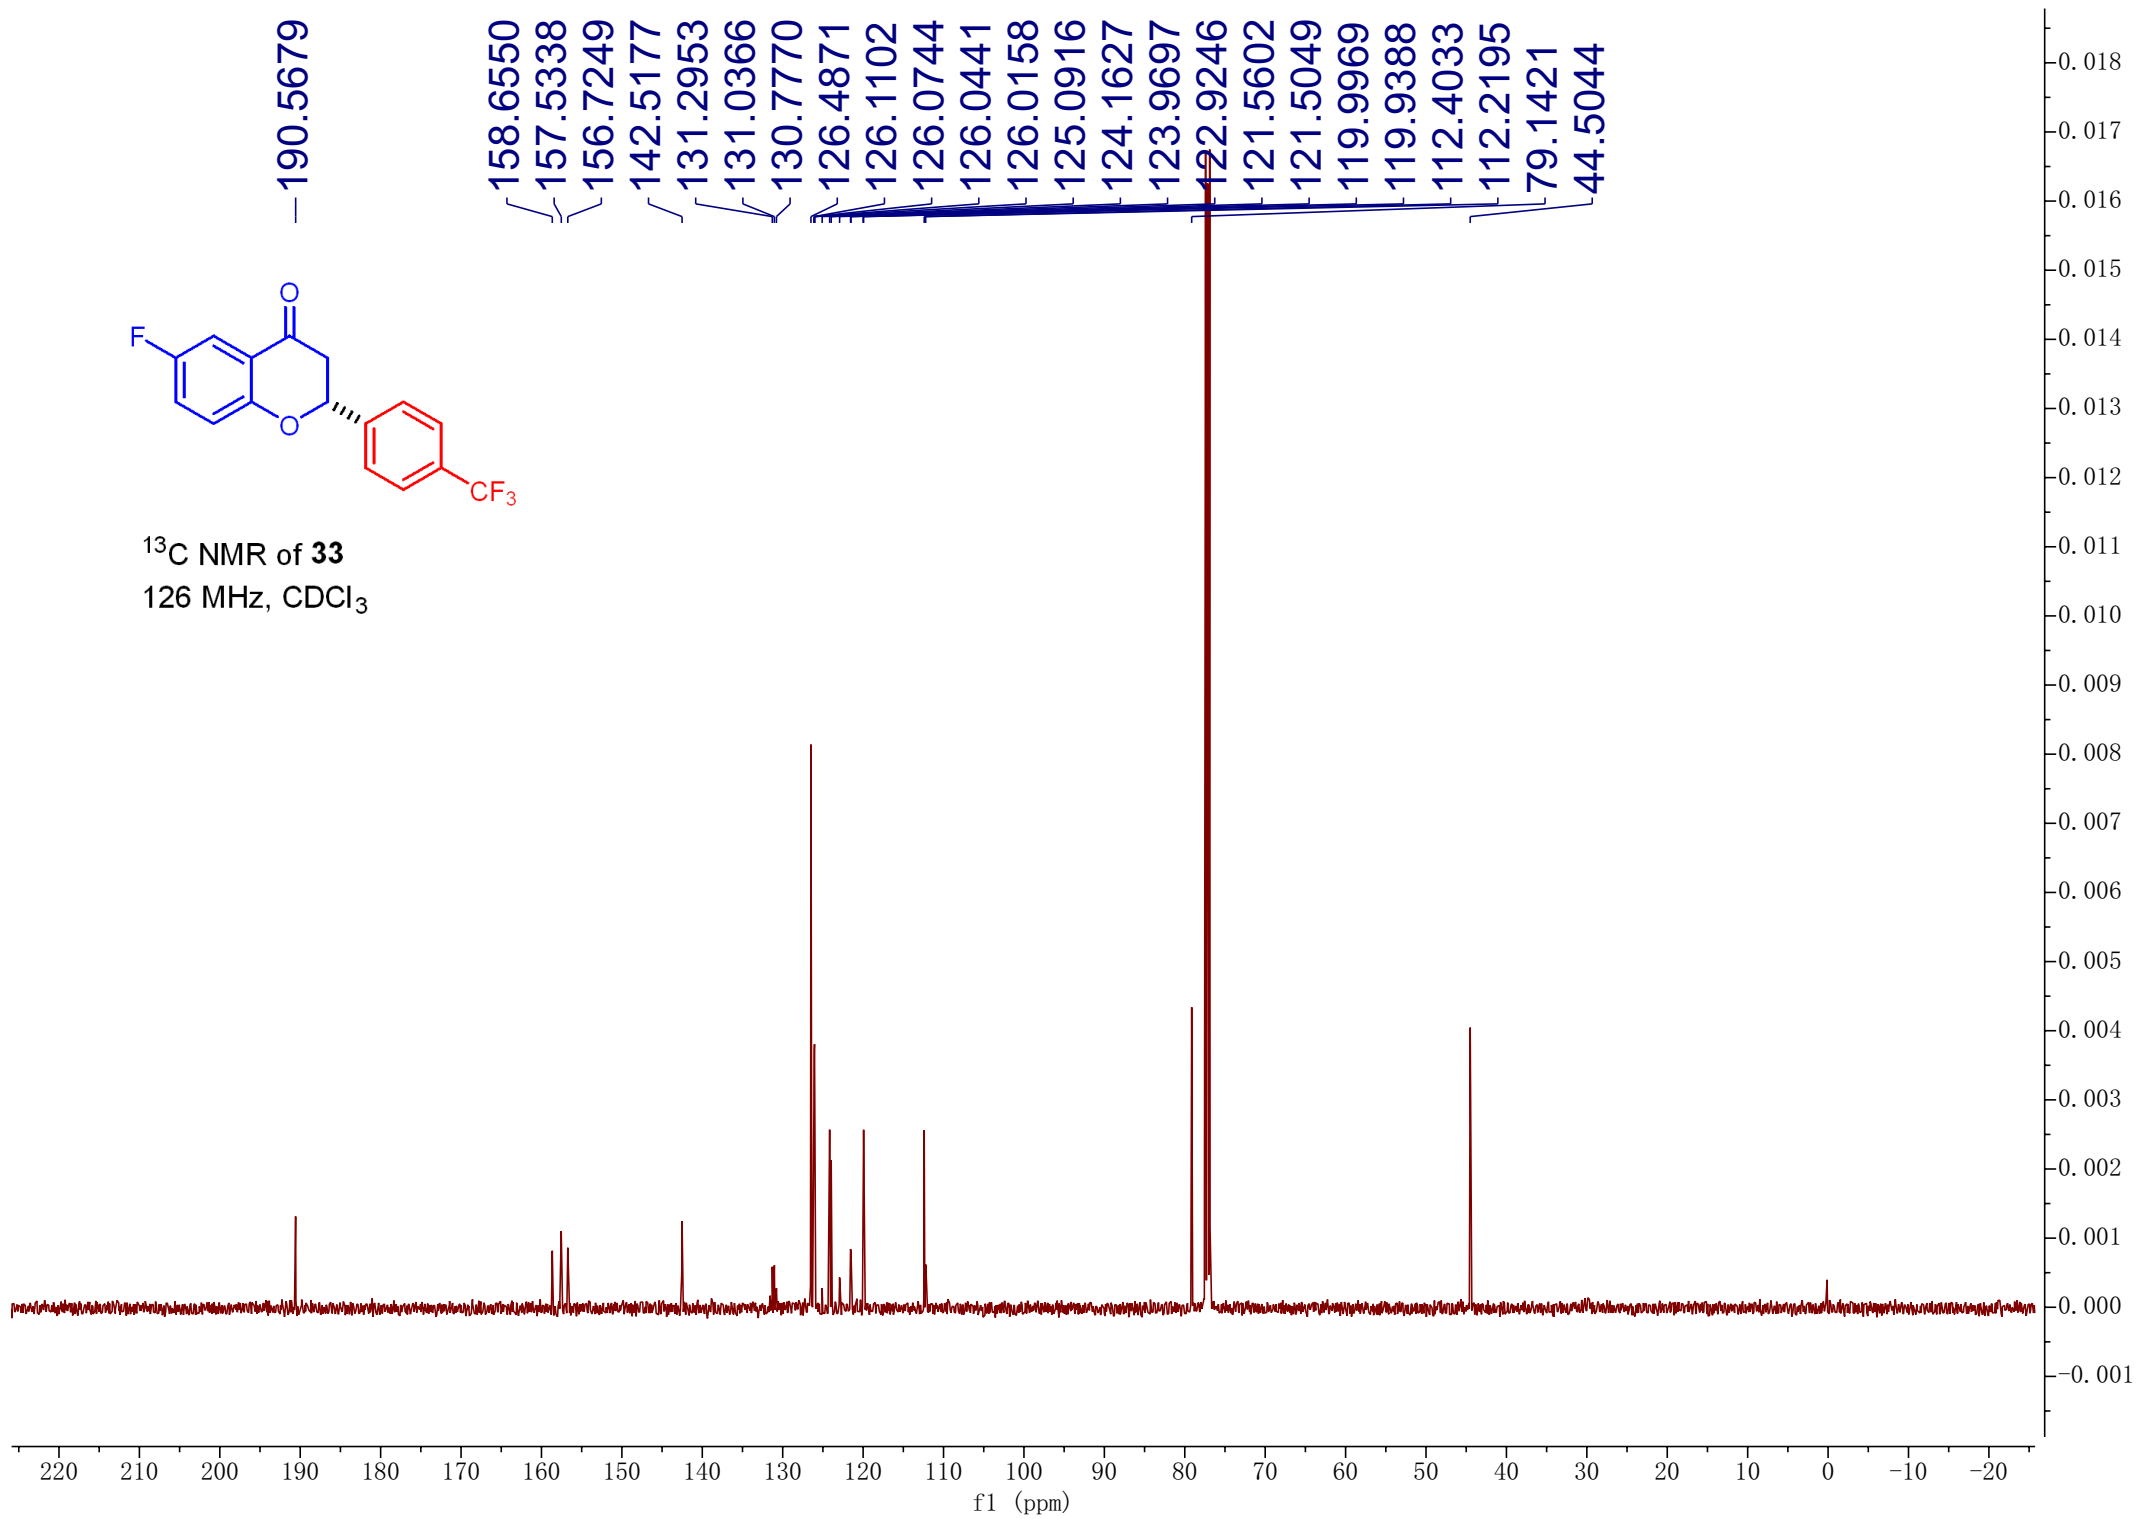

7.5744  
7.5676  
7.5574  
7.5514  
7.3625  
7.3588  
7.3506  
7.3464  
7.2455  
7.2298  
7.2125  
7.2057  
7.1966  
7.1907  
7.0270  
7.0189  
7.0087  
5.9997  
5.4259  
5.4043  
5.3987

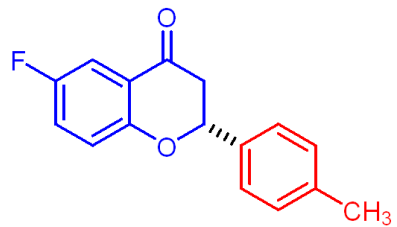

<sup>1</sup>H NMR of **34**  
500 MHz, CDCl<sub>3</sub>

3.0990  
3.0717  
3.0647  
3.0382  
2.8905  
2.8848  
2.8837  
2.8563  
2.8505  
2.3768

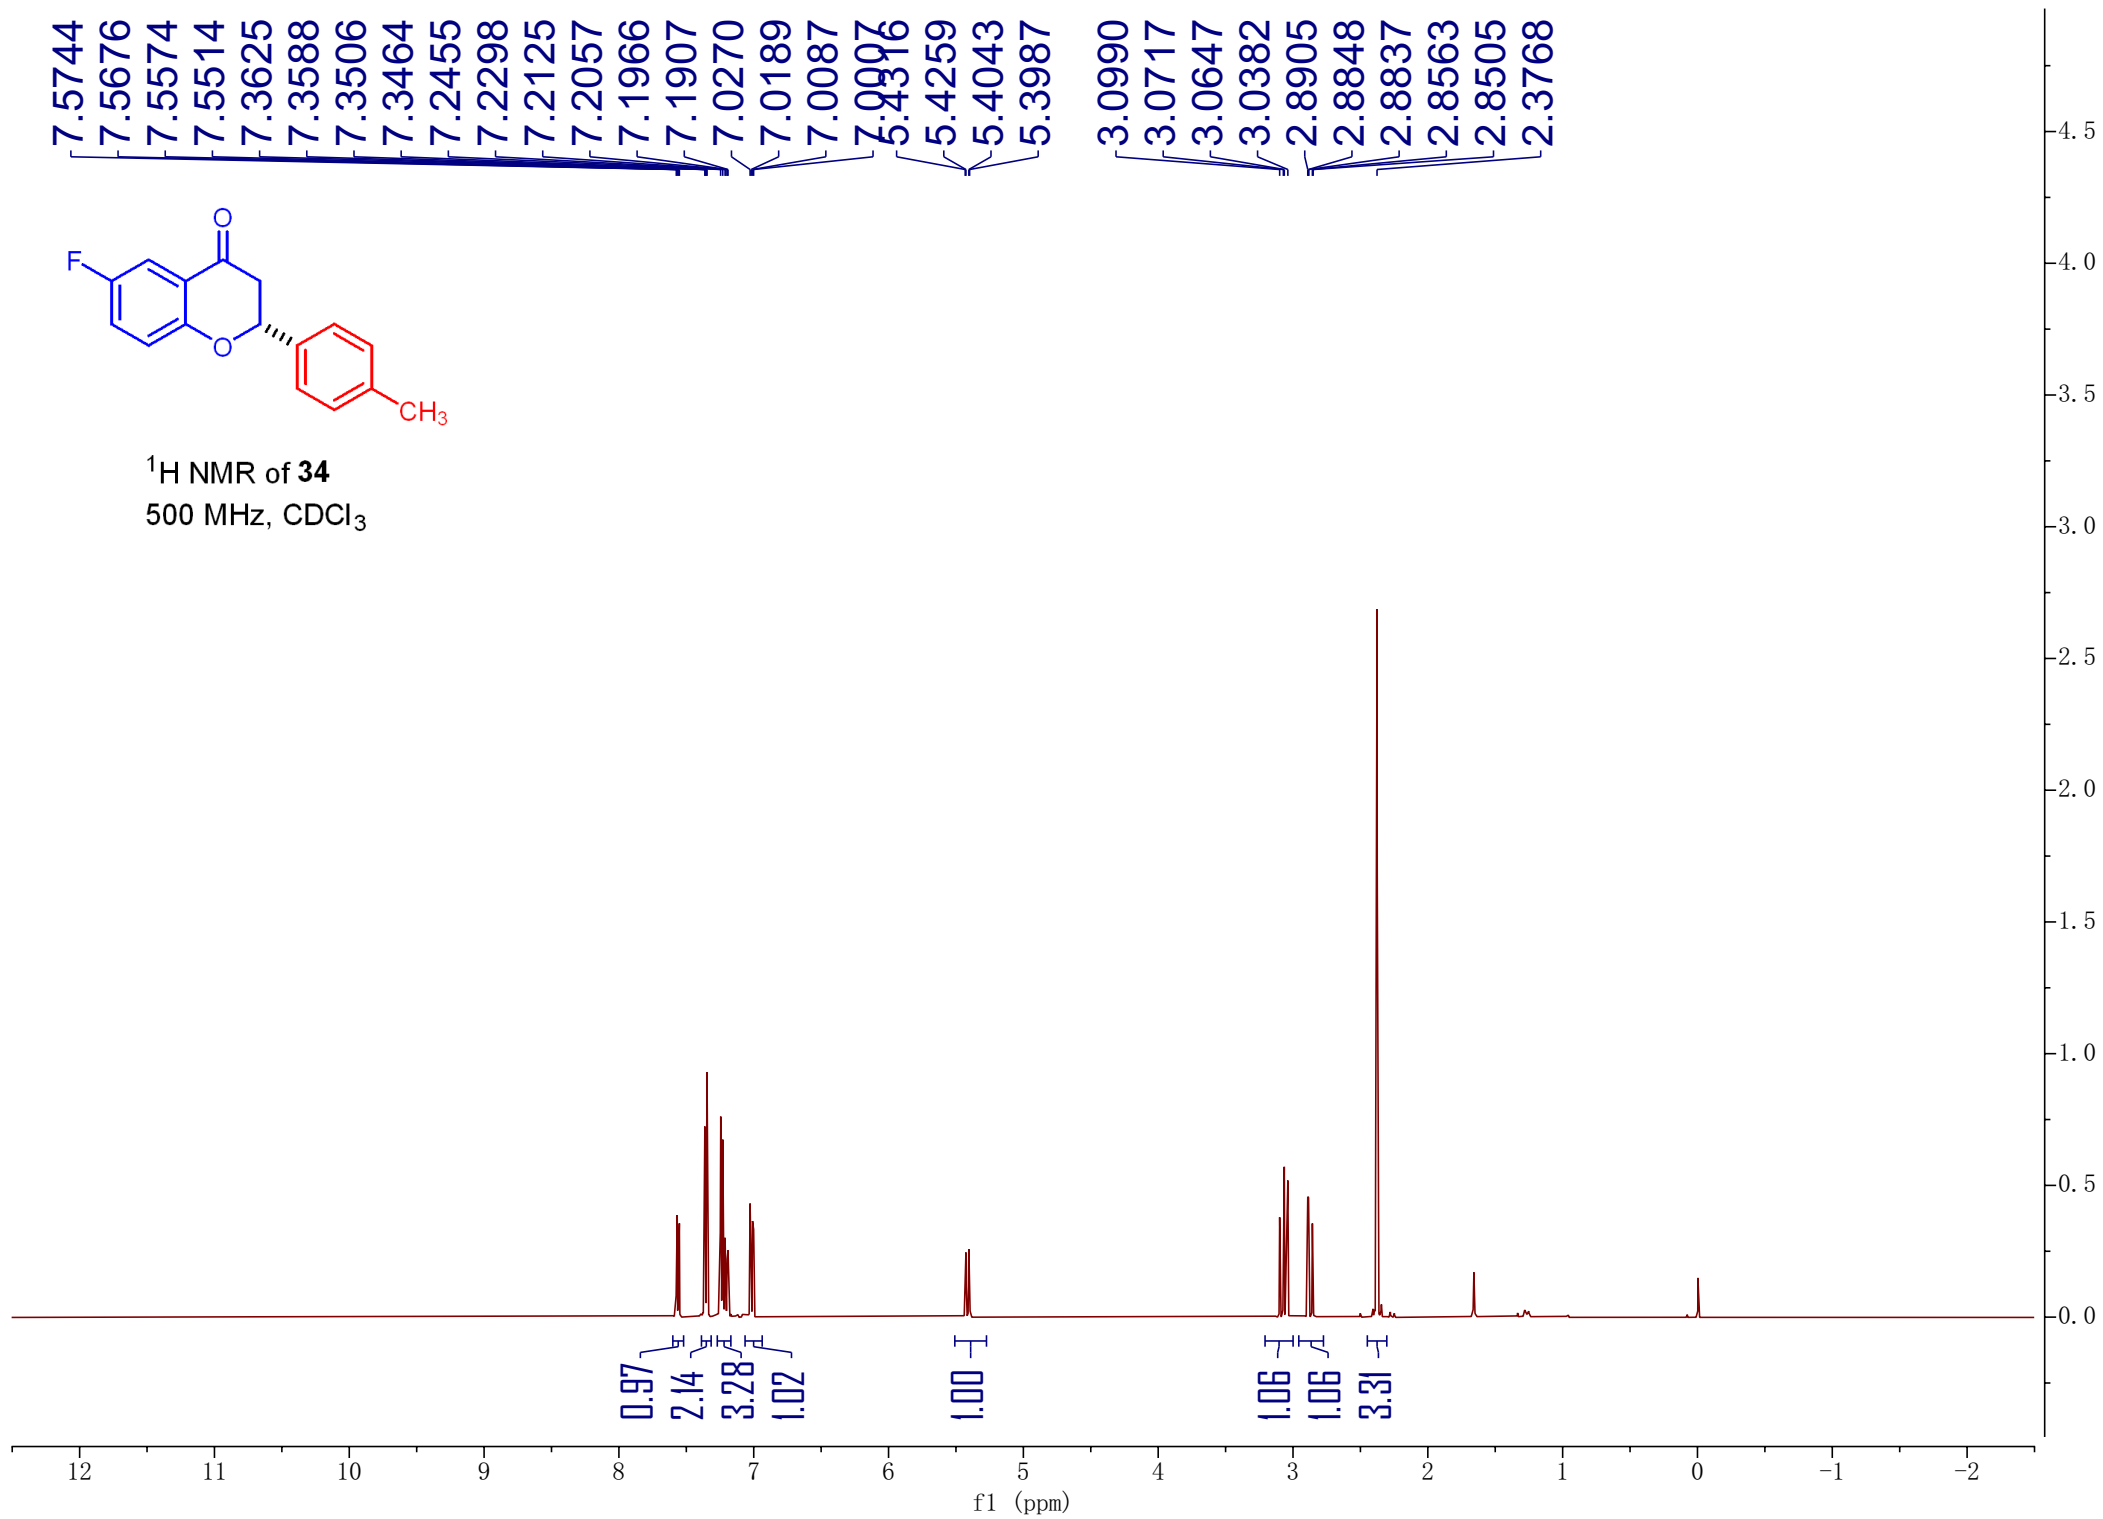

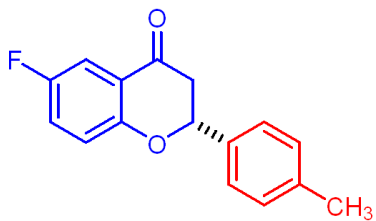

<sup>13</sup>C NMR of **34**  
126 MHz, CDCl<sub>3</sub>

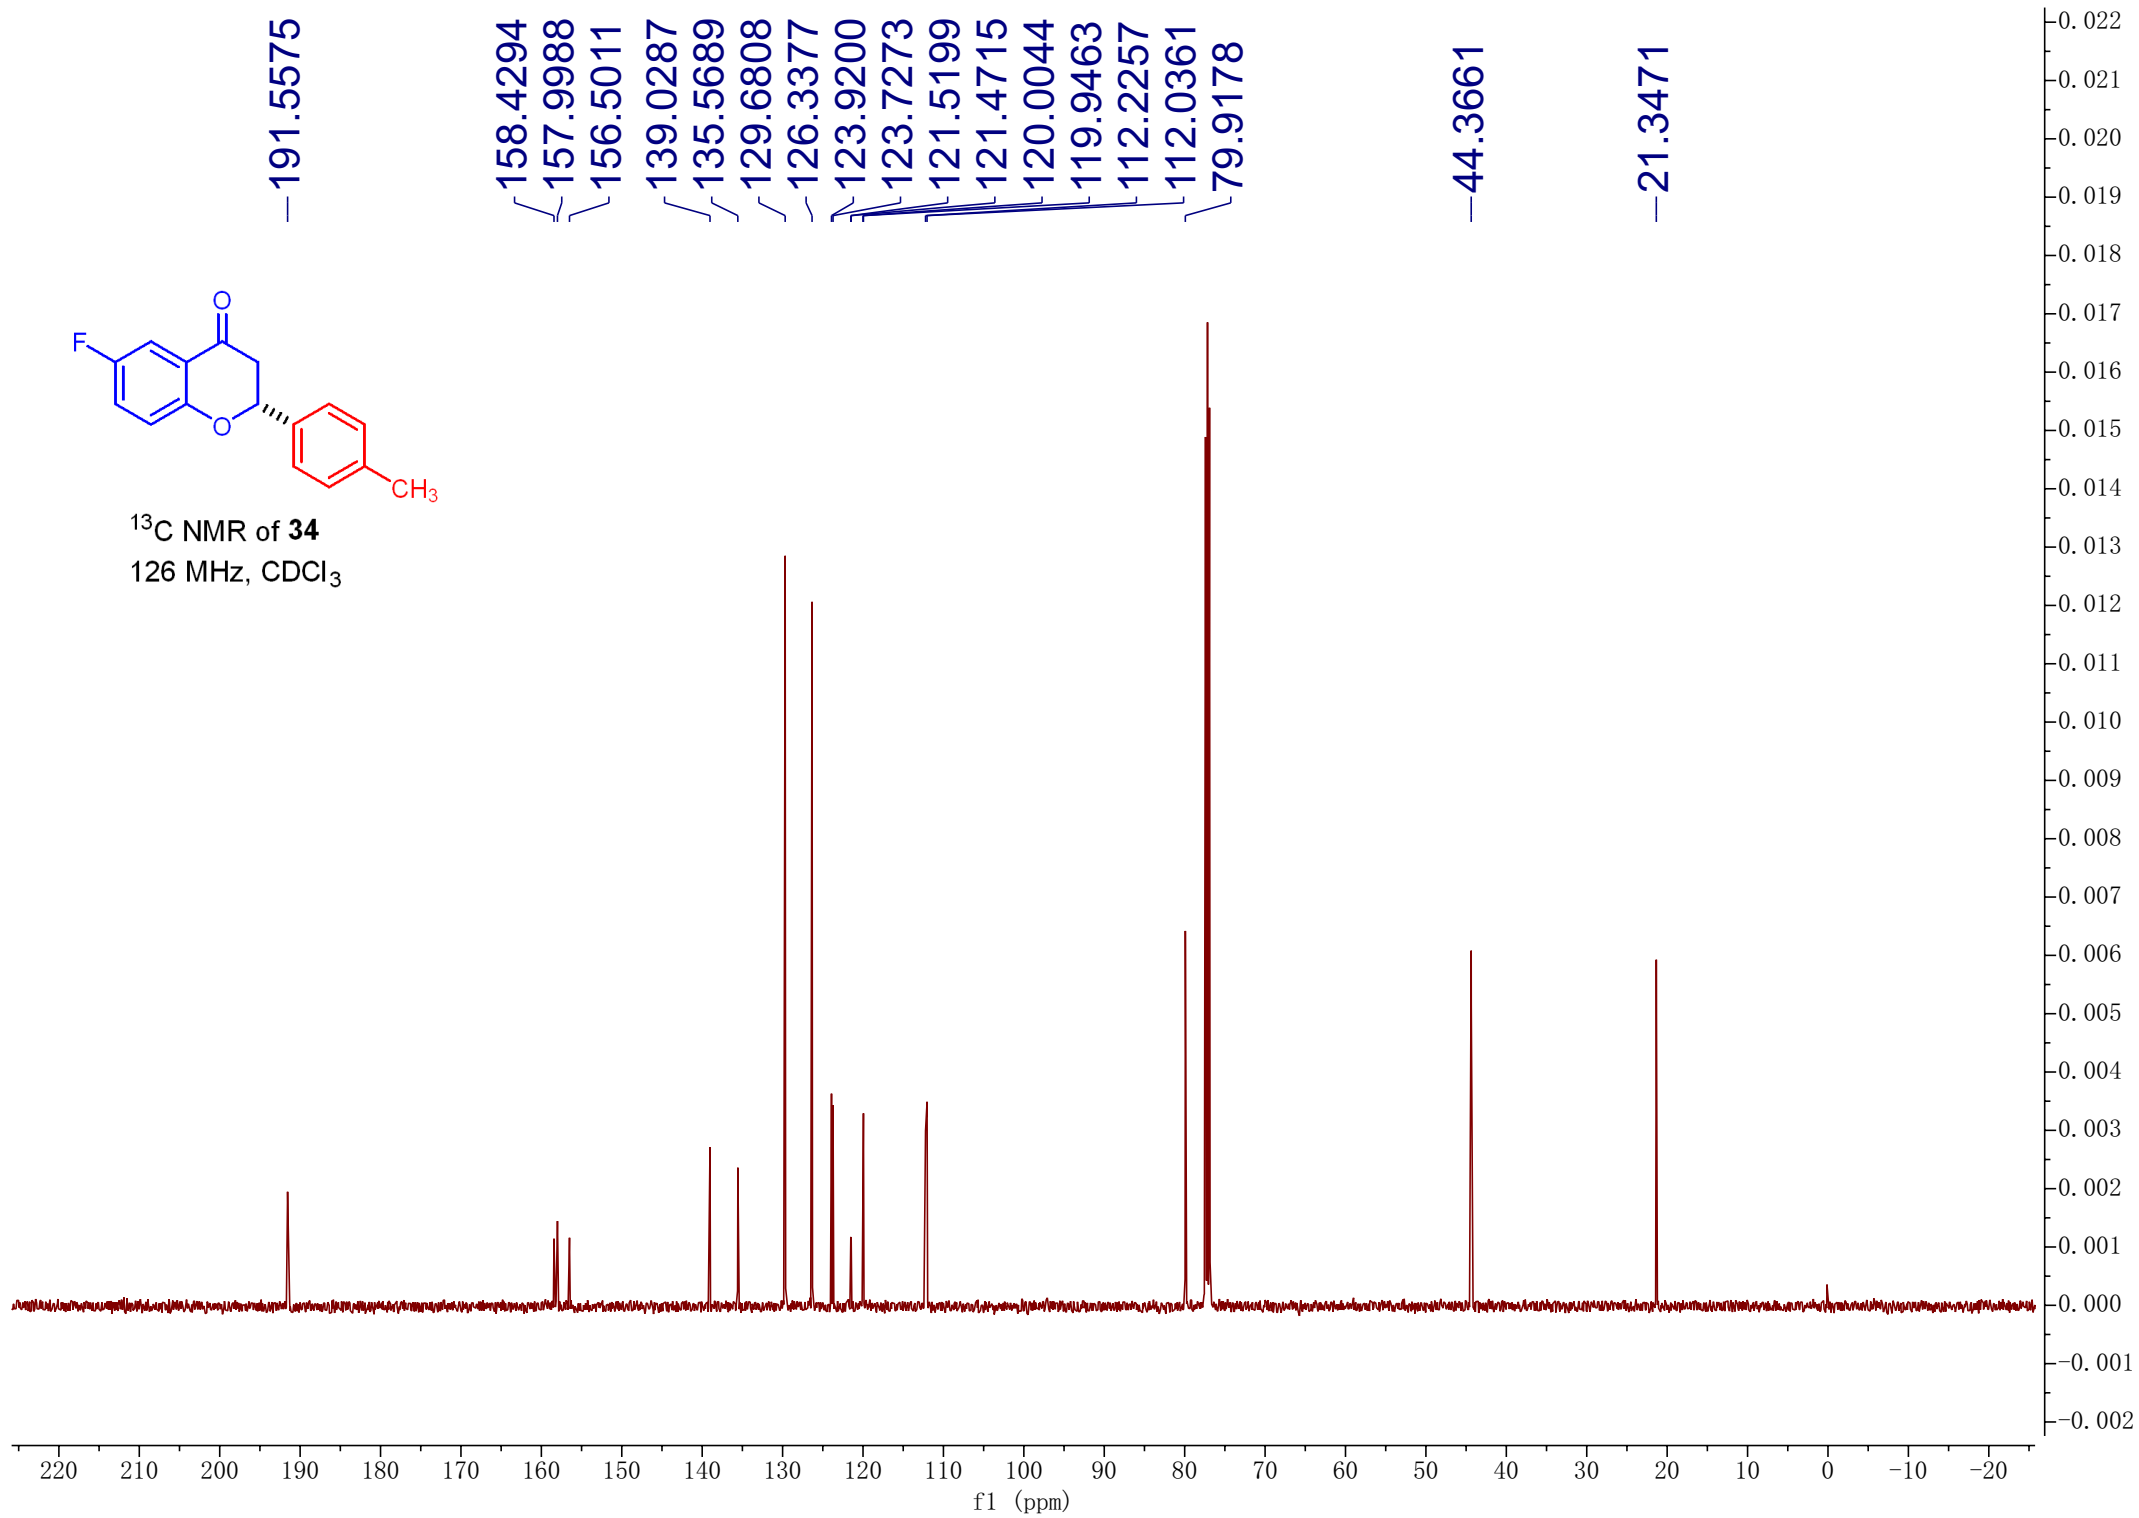



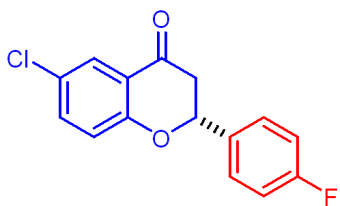

<sup>1</sup>H NMR of **35**  
400 MHz, CDCl<sub>3</sub>

7.8889  
7.8822  
7.4893  
7.4840  
7.4785  
7.4723  
7.4682  
7.4638  
7.4600  
7.4492  
7.4444  
7.4378  
7.4348  
7.4294  
7.4253  
7.4191  
7.4142  
7.4085  
7.4057  
7.3975  
7.0287  
7.0067  
5.4942  
5.4868  
5.4611  
5.4536

3.1181  
3.0852  
3.0757  
3.0427  
2.9316  
2.9241  
2.8891  
2.8817

0.93

5.82

0.99

1.00

1.02

1.01

f1 (ppm)

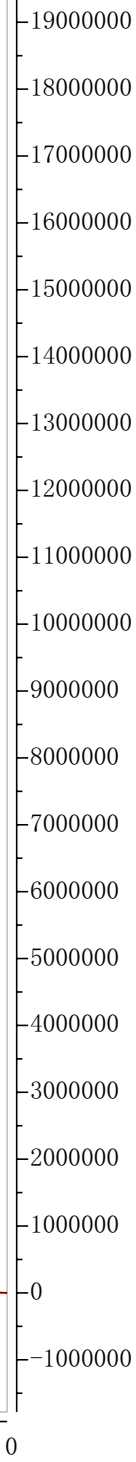

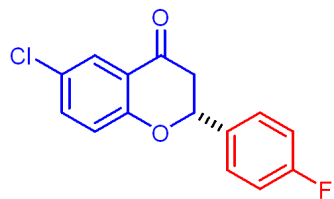

<sup>13</sup>C NMR of **35**  
101 MHz, CDCl<sub>3</sub>

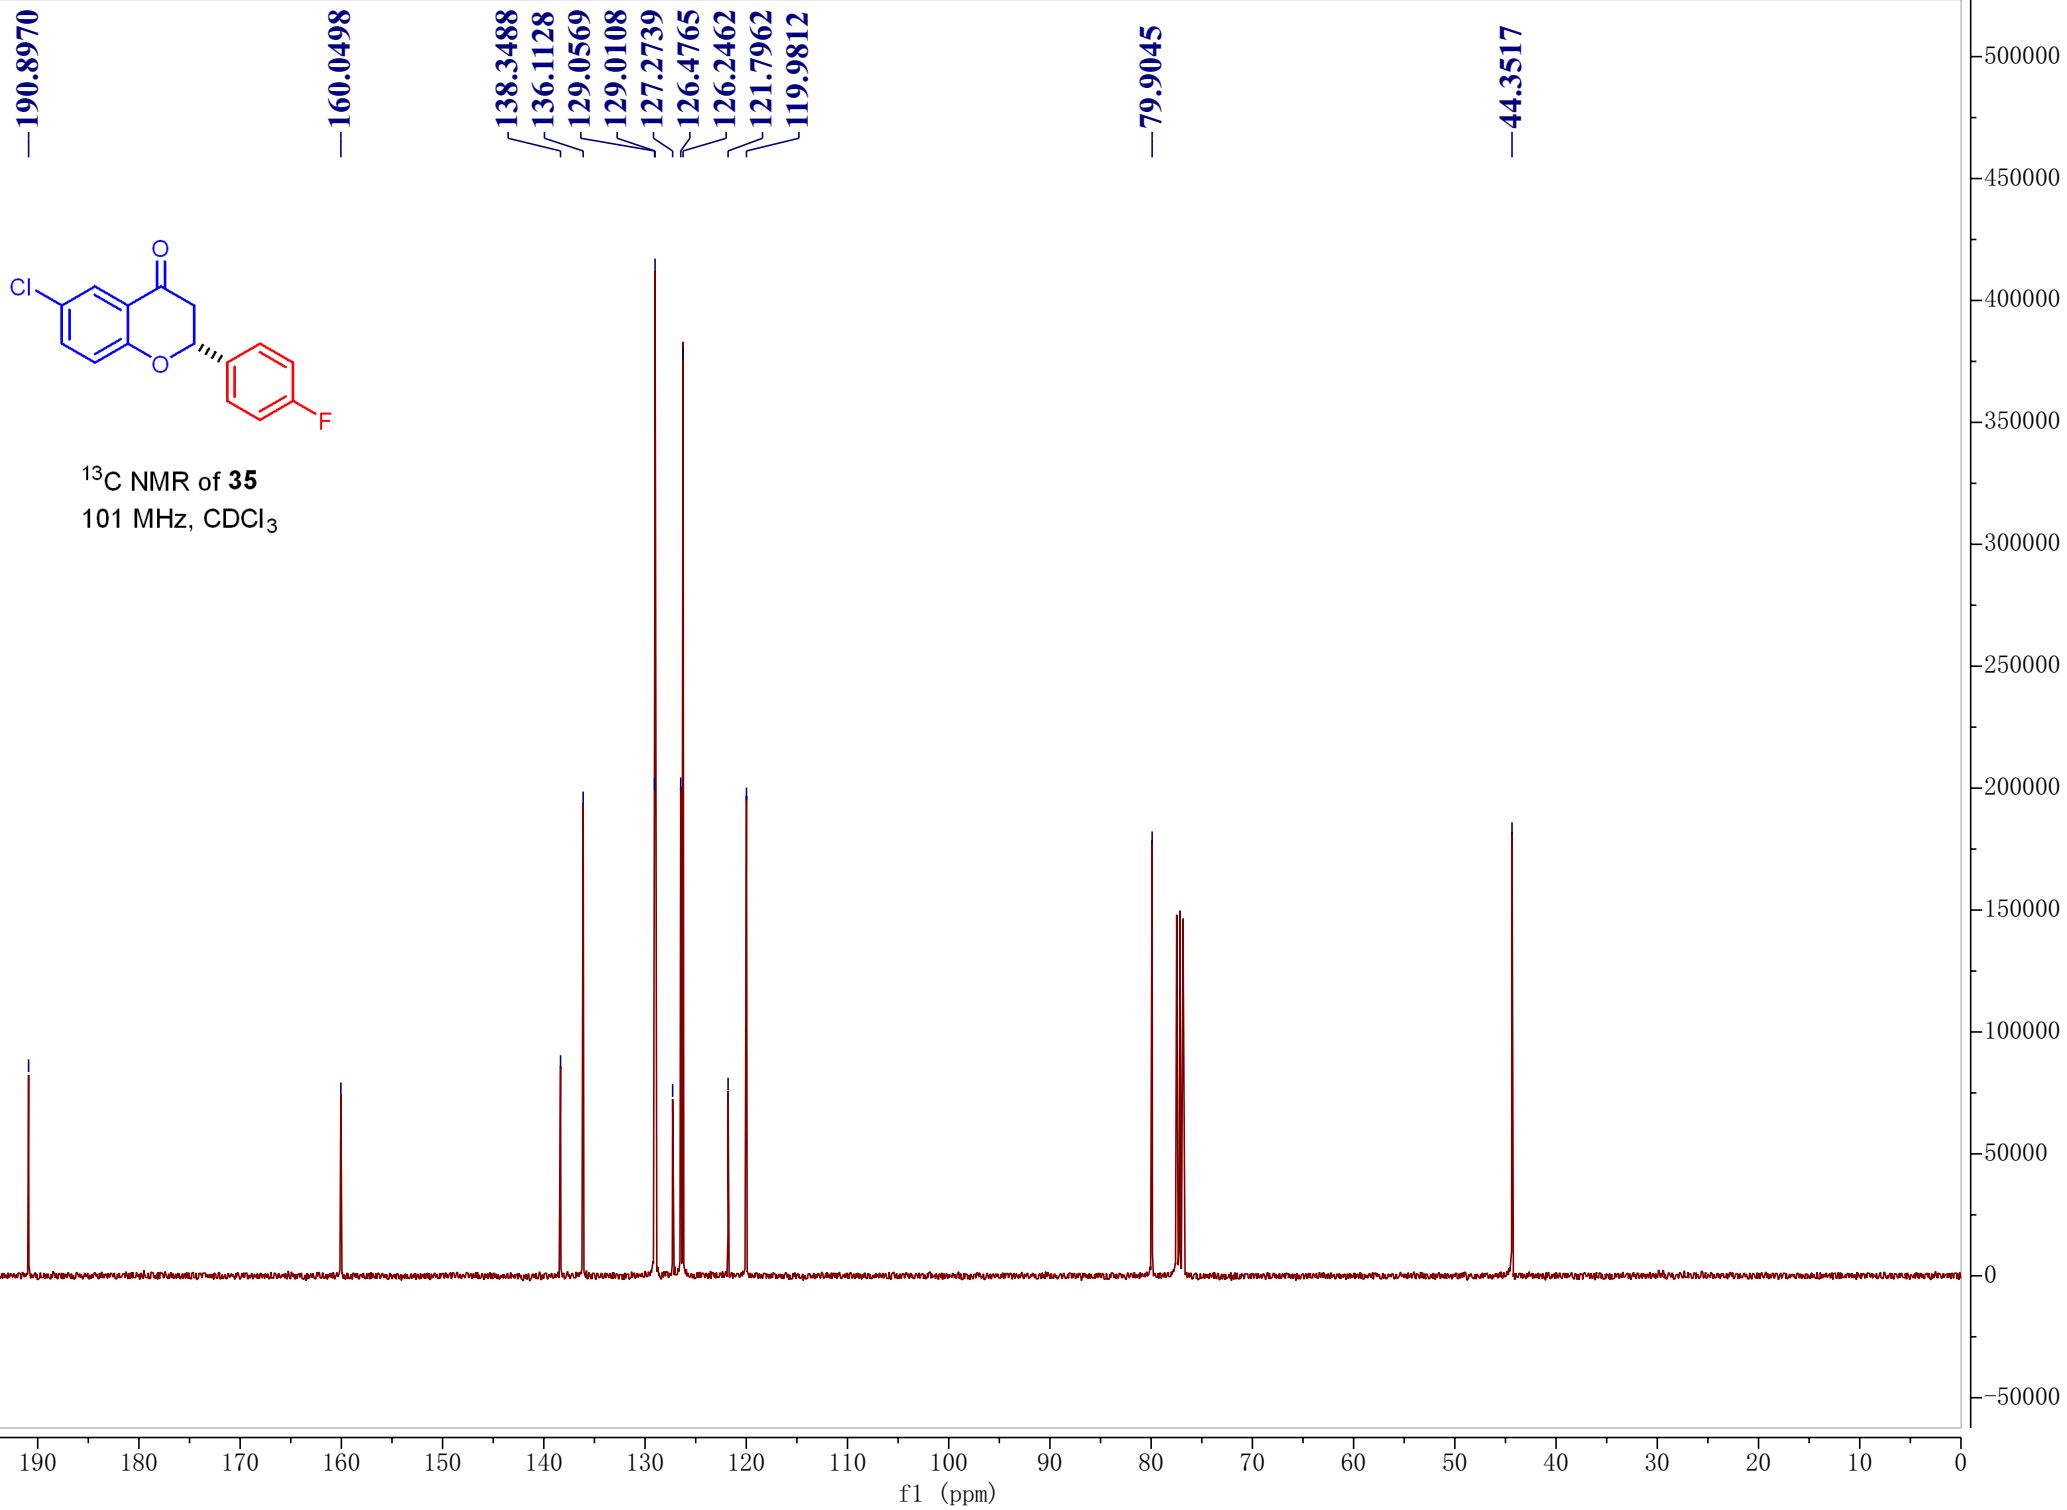

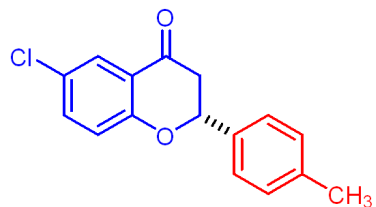

<sup>1</sup>H NMR of **36**  
500 MHz, CDCl<sub>3</sub>

7.7944  
7.7878  
7.3562  
7.3493  
7.3363  
7.3341  
7.3295  
7.3273  
7.2804  
7.2601  
7.1704  
7.1679  
7.1487  
6.9236  
6.9015  
5.3670  
5.3597  
5.3340  
5.3268

3.0315  
2.9985  
2.9891  
2.9561  
2.8190  
2.8116  
2.7765  
2.7693  
2.2998

0.91  
1.05  
1.91  
2.02  
1.00

1.00

1.03  
1.02

3.05

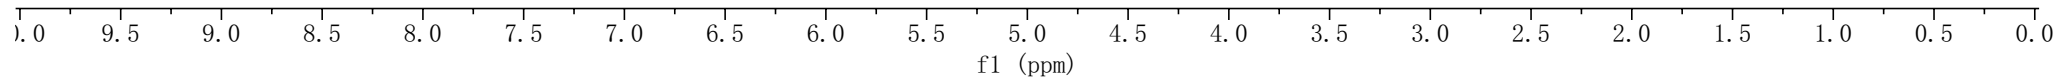

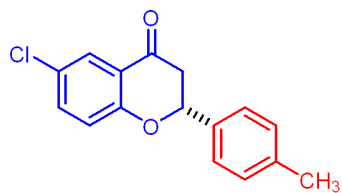

$^{13}\text{C}$  NMR of **36**  
126 MHz,  $\text{CDCl}_3$

—191.0812

—160.1196

—139.0201

—136.0618

—135.3538

—129.6511

—127.1735

—126.4501

—126.2997

—121.7885

—119.9930

—79.8380

—44.2253

—21.3198

210 200 190 180 170 160 150 140 130 120 110 100 90 80 70 60 50 40 30 20 10 0 -10

f1 (ppm)

800000  
750000  
700000  
650000  
600000  
550000  
500000  
450000  
400000  
350000  
300000  
250000  
200000  
150000  
100000  
50000  
0  
-50000  
-100000

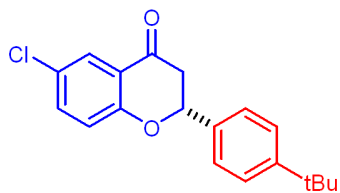

<sup>1</sup>H NMR of **37**  
400 MHz, CDCl<sub>3</sub>

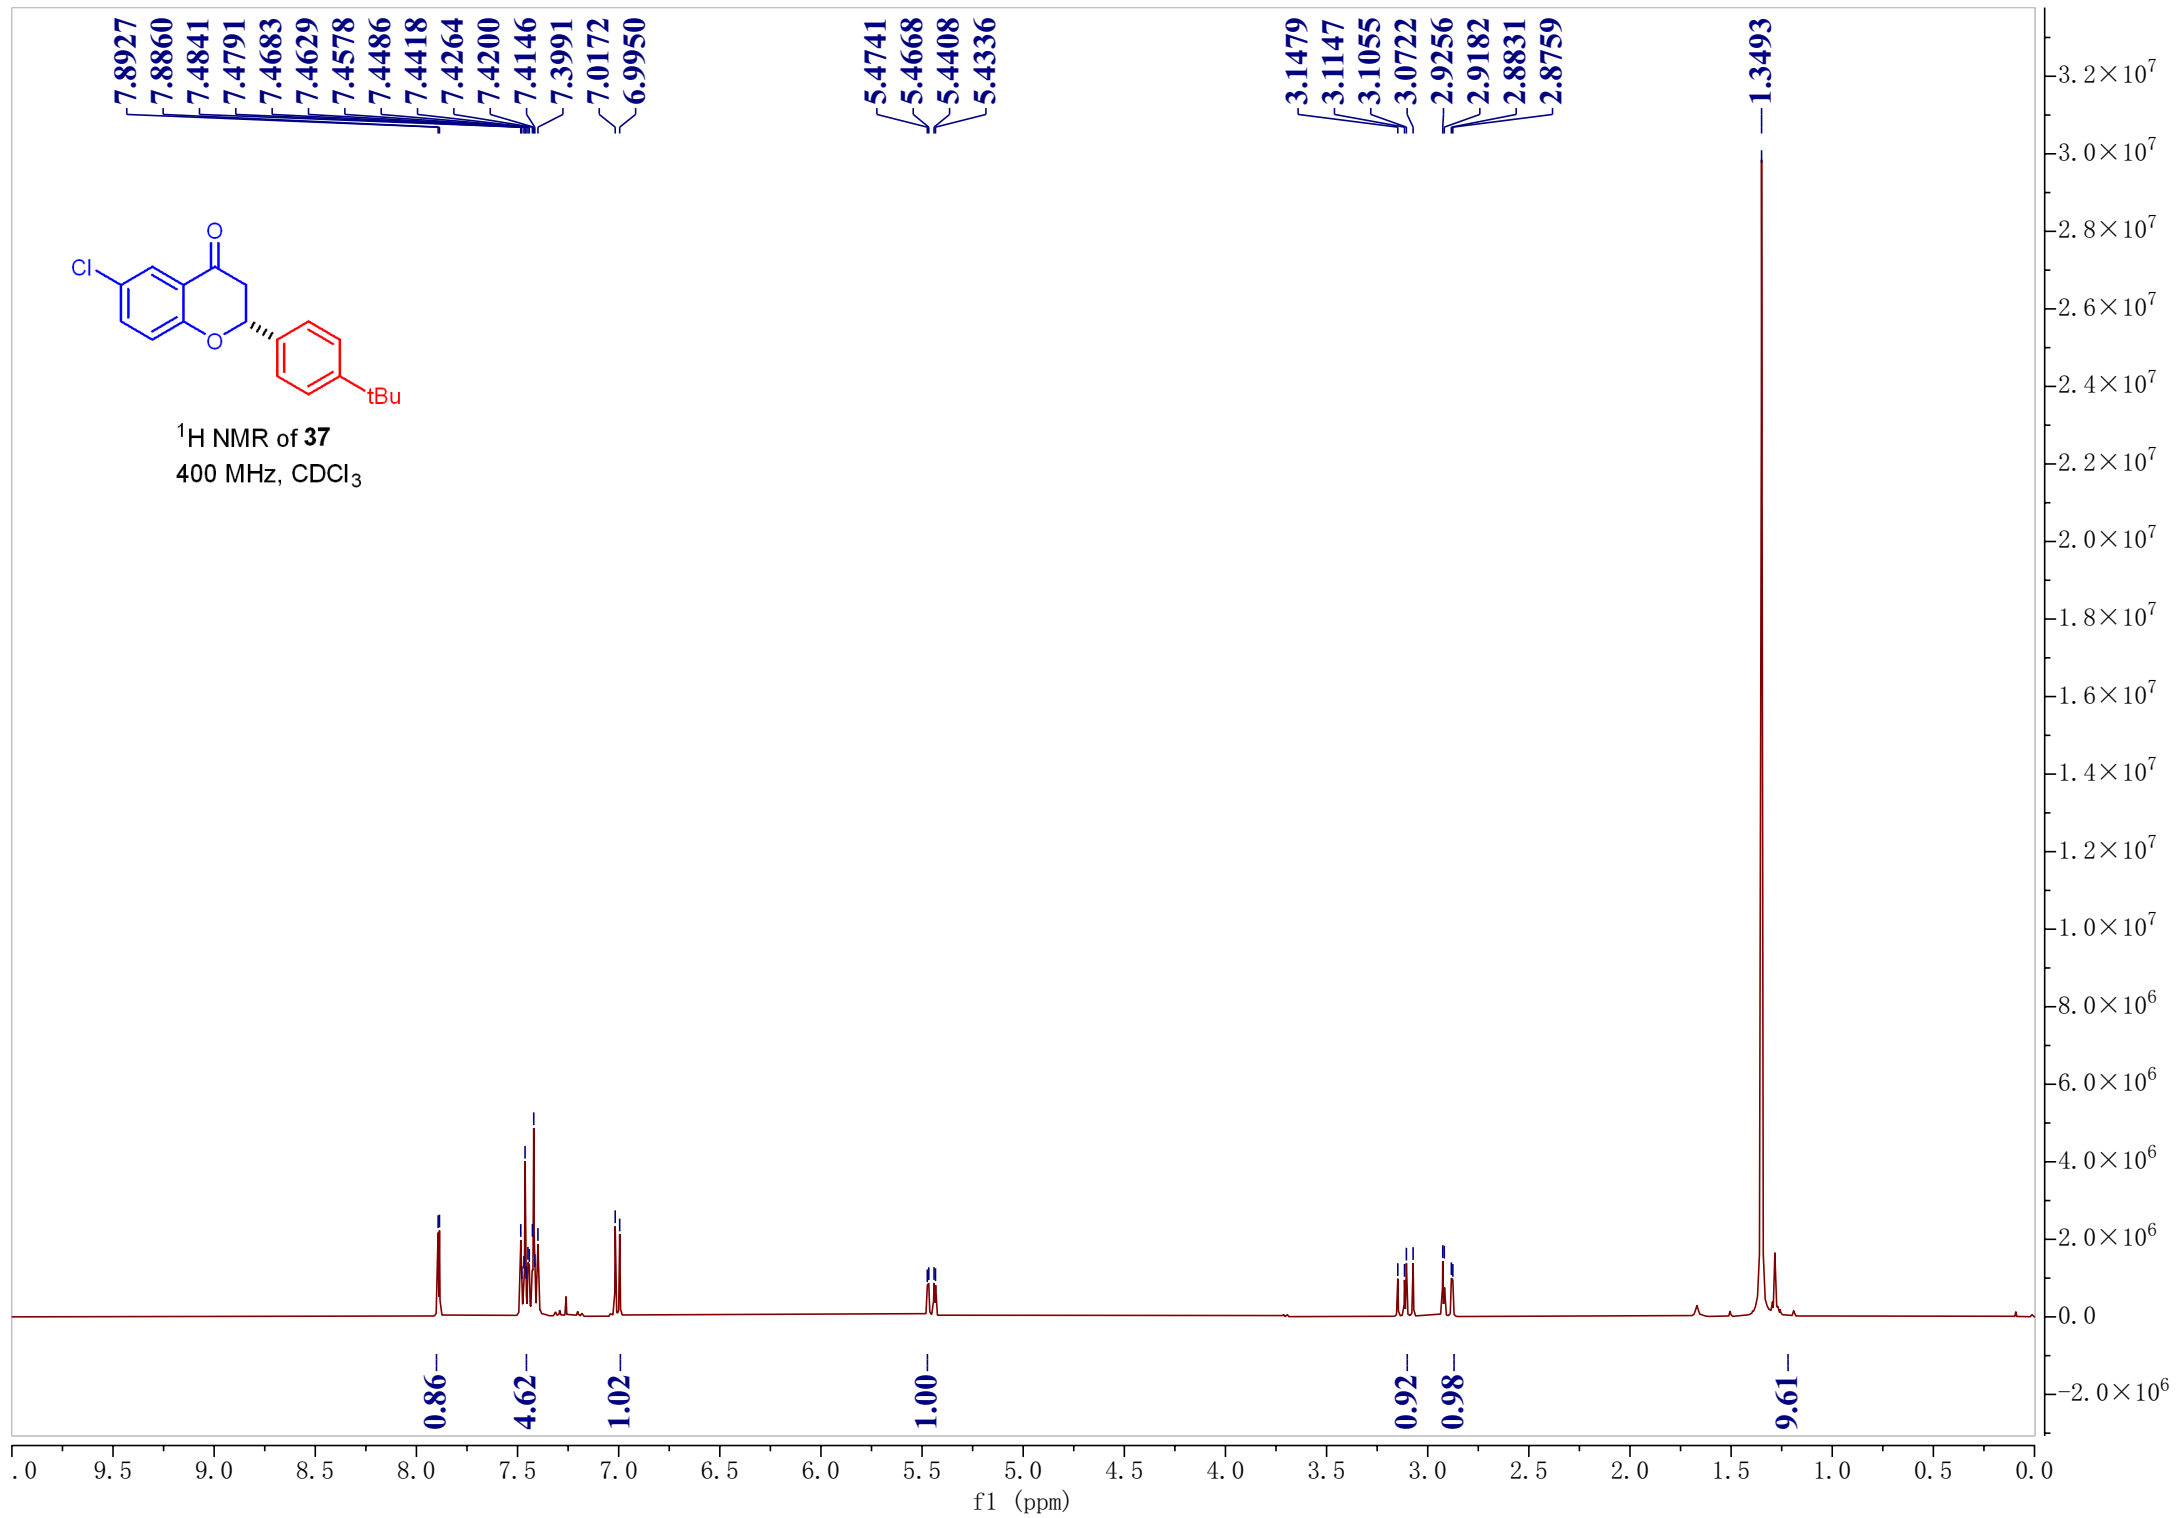

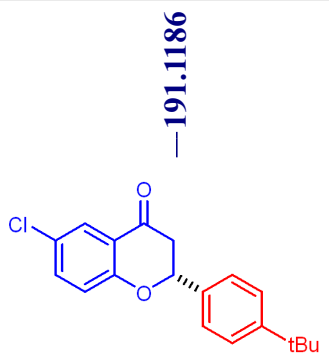

<sup>13</sup>C NMR of **37**  
101 MHz, CDCl<sub>3</sub>

—191.1186  
—160.1632  
—152.2688  
—136.0732  
—135.2546  
—127.1877  
—126.4750  
—126.1567  
—125.9585  
—121.8118  
—119.9990

—79.8482

—44.1564

—34.8021

—31.4410

—31.3966

210 200 190 180 170 160 150 140 130 120 110 100 90 80 70 60 50 40 30 20 10 0 -10

f1 (ppm)

750000  
700000  
650000  
600000  
550000  
500000  
450000  
400000  
350000  
300000  
250000  
200000  
150000  
100000  
50000  
0  
-50000

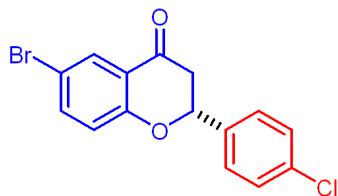

<sup>1</sup>H NMR of **38**  
500 MHz, CDCl<sub>3</sub>

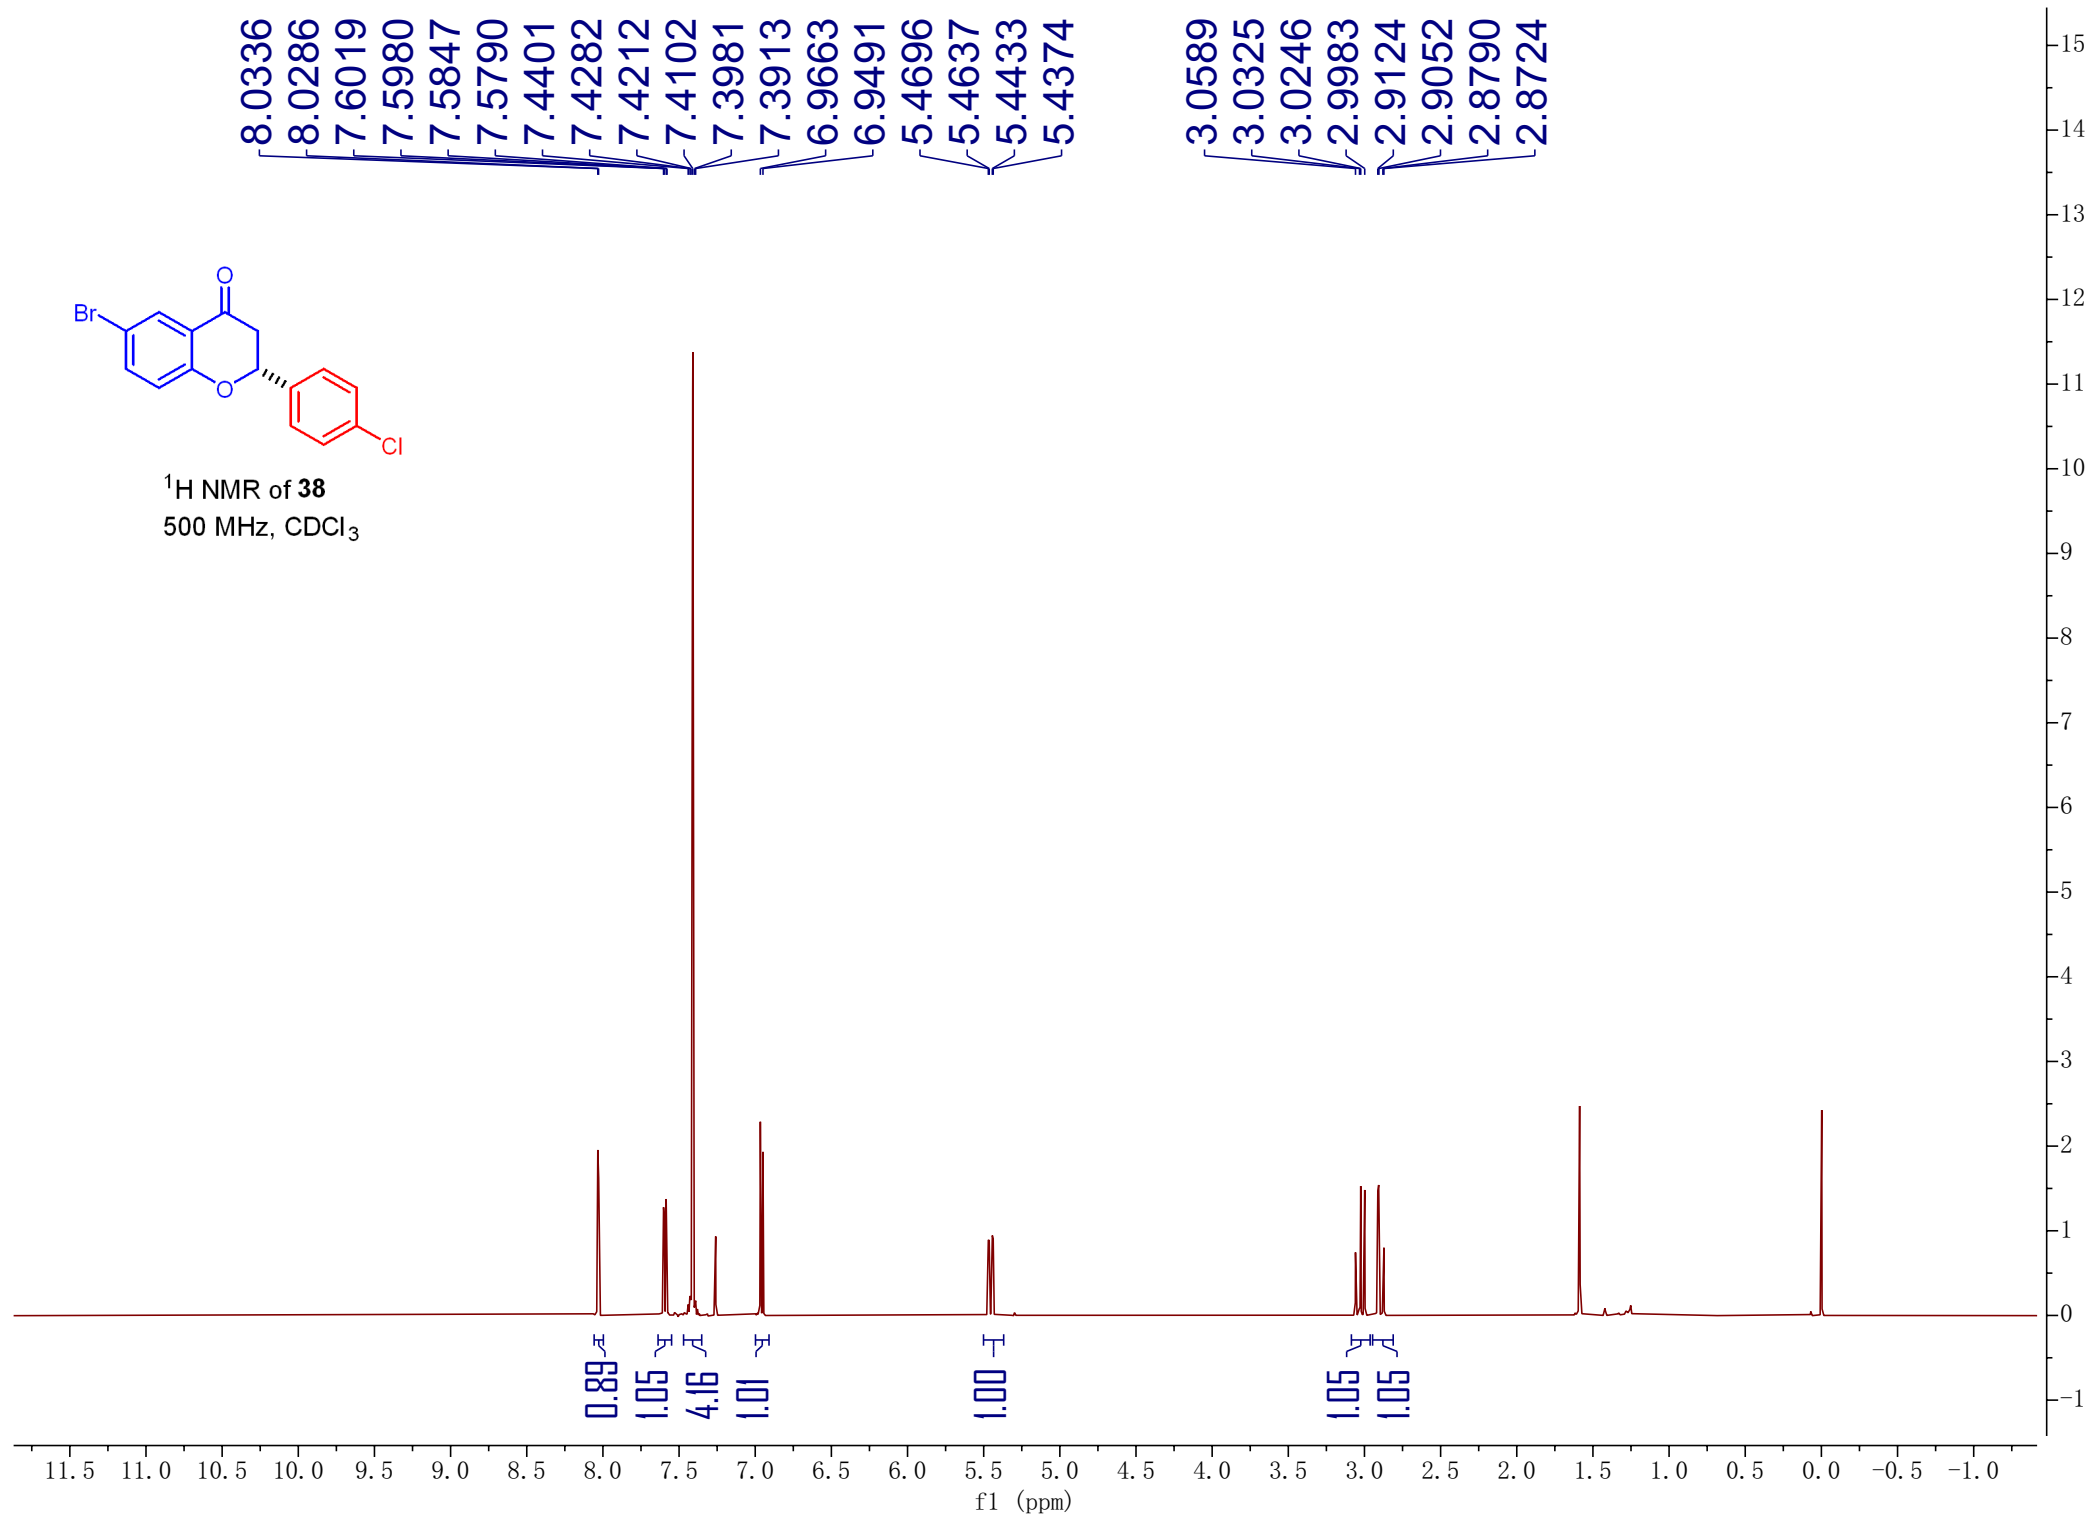

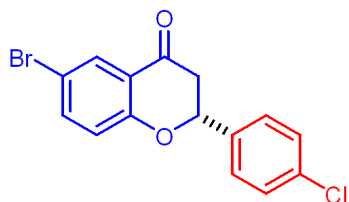

<sup>13</sup>C NMR of **38**  
126 MHz, CDCl<sub>3</sub>

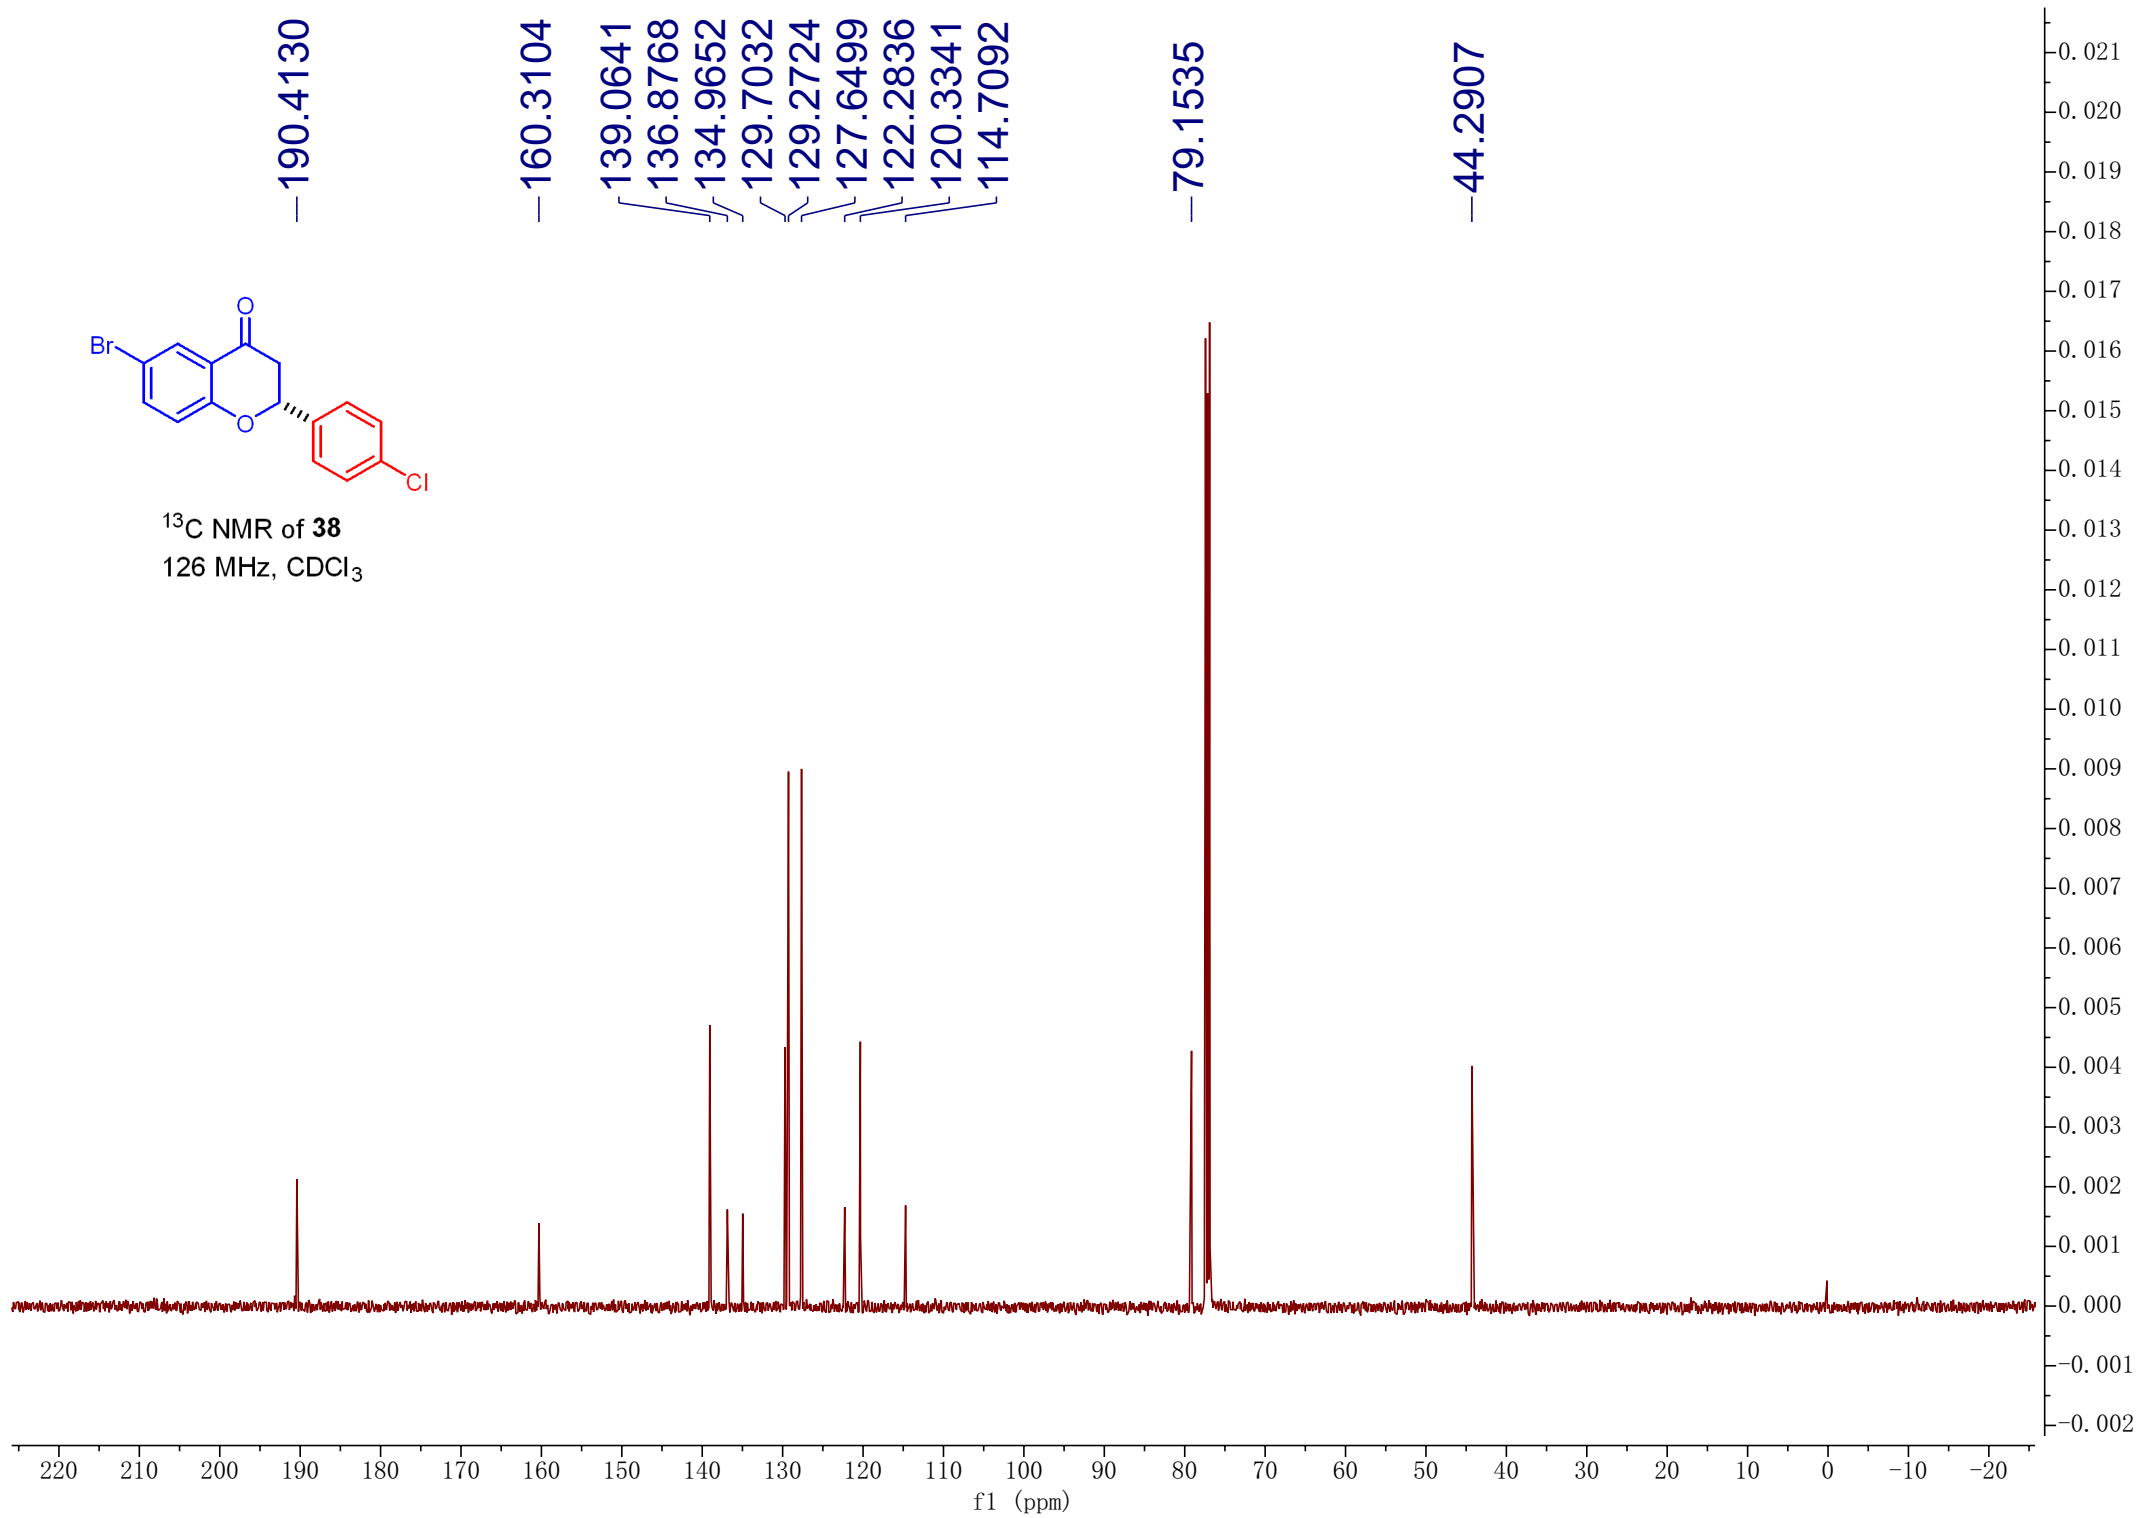



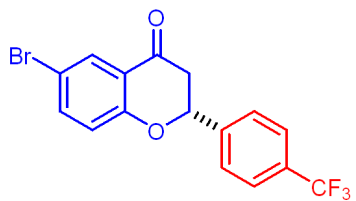

<sup>1</sup>H NMR of **39**  
500 MHz, CDCl<sub>3</sub>

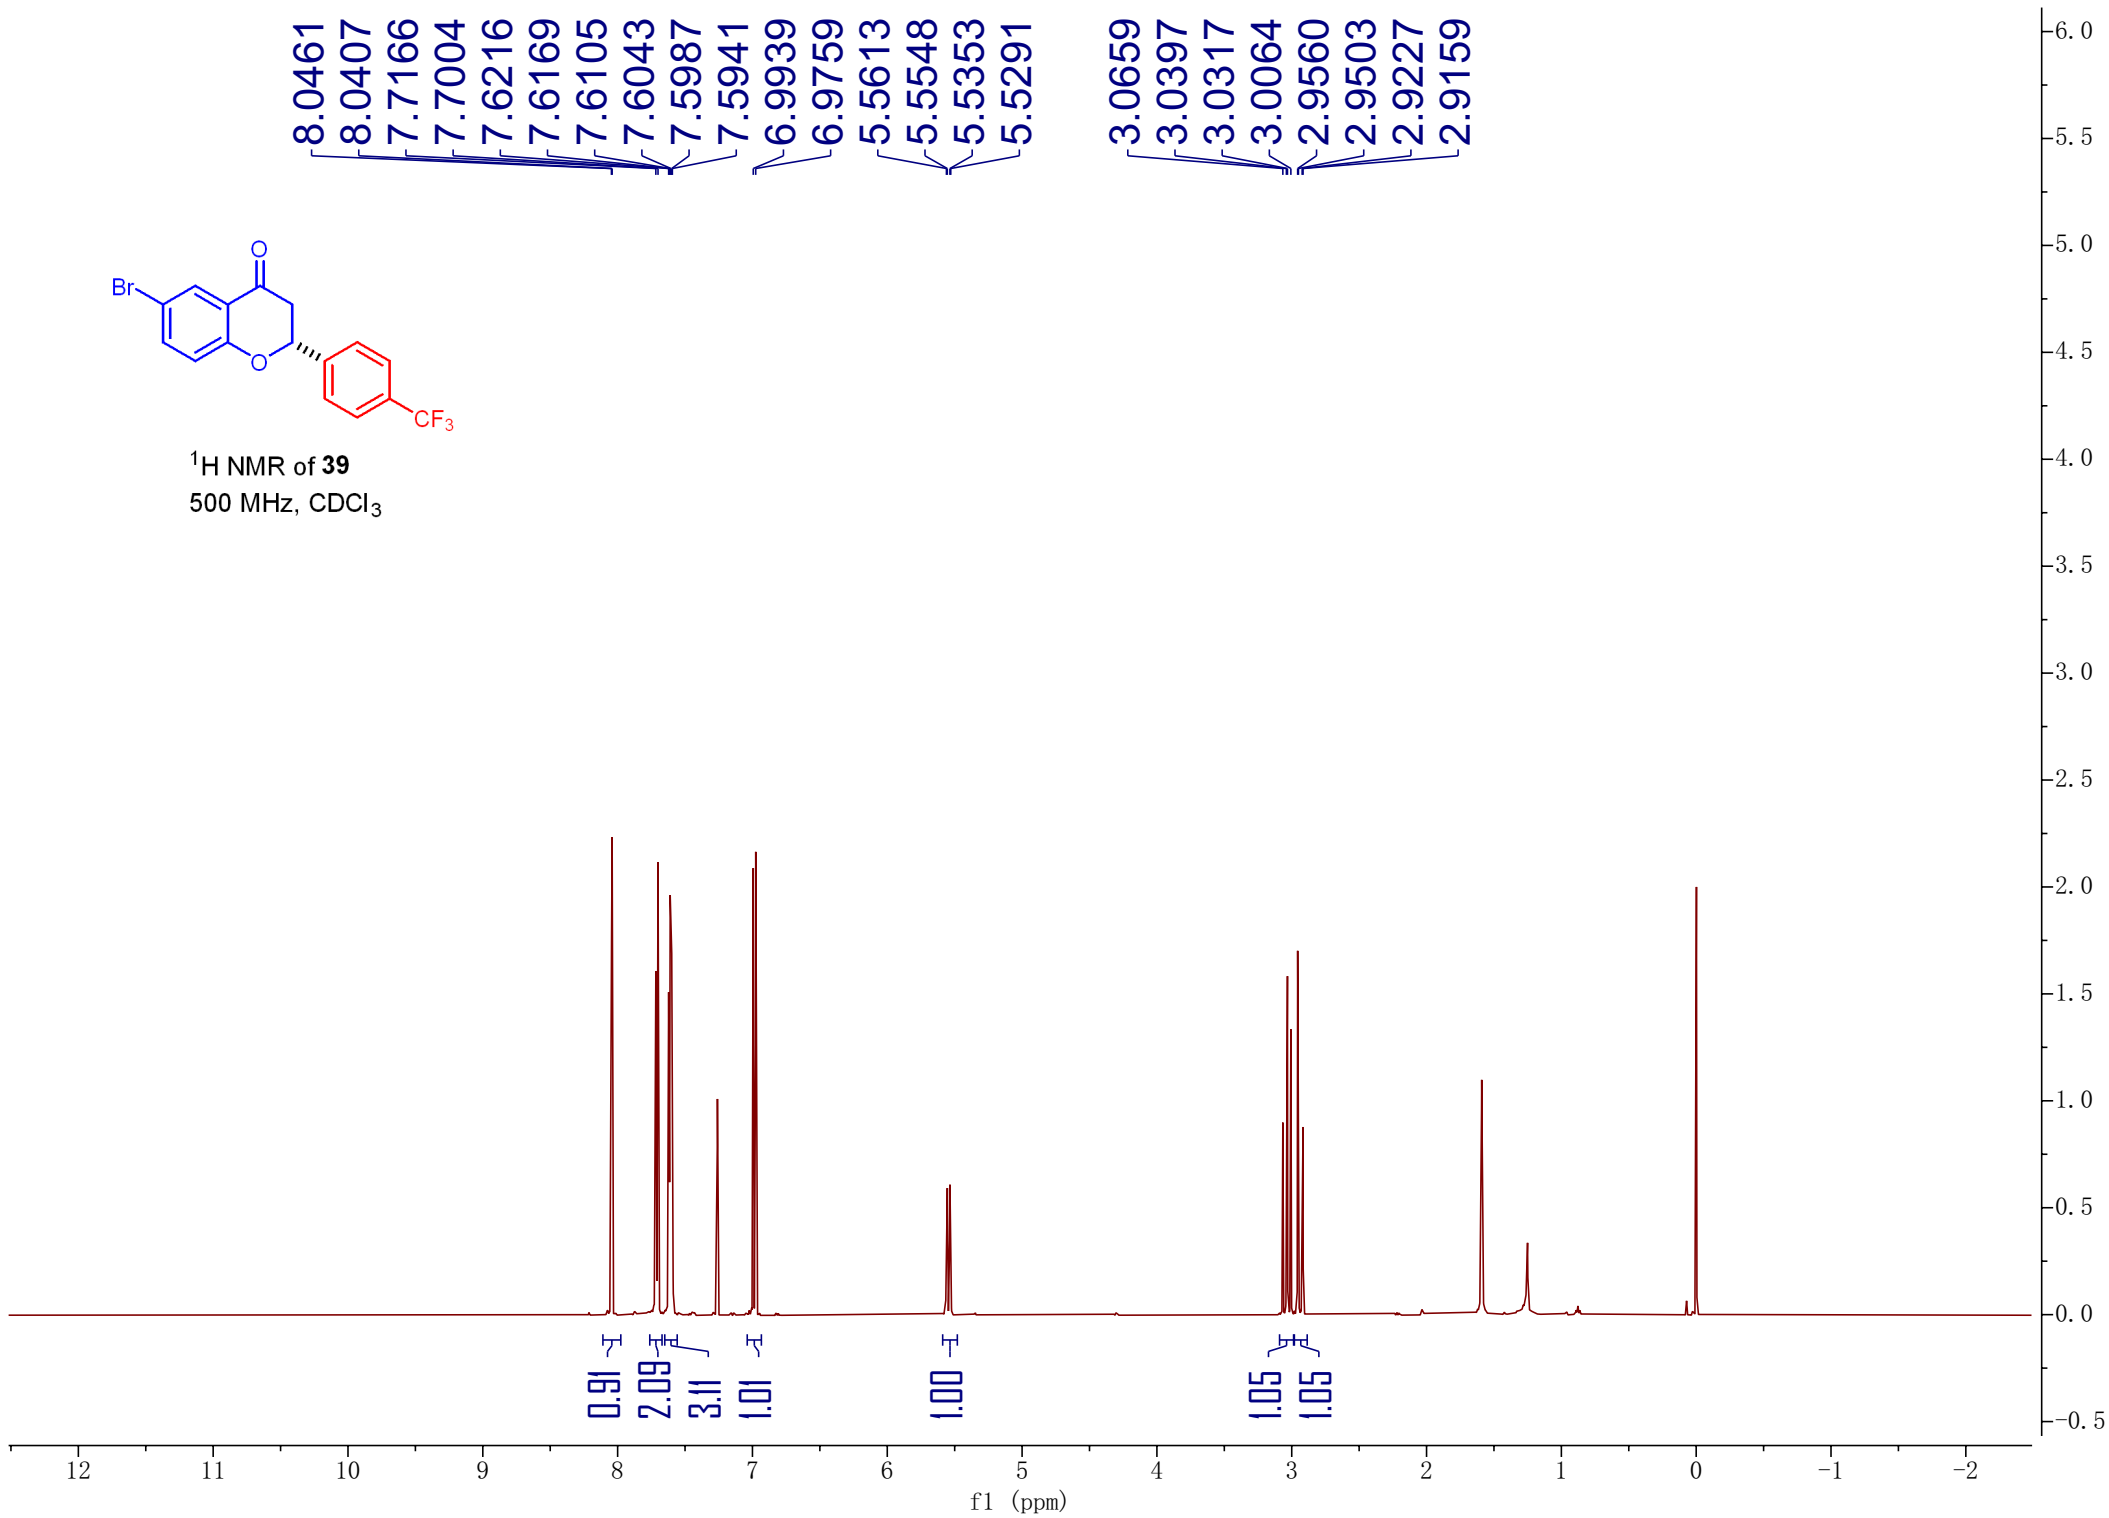

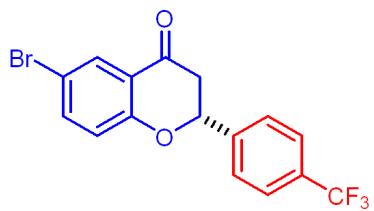

$^{13}\text{C}$  NMR of **39**  
126 MHz,  $\text{CDCl}_3$

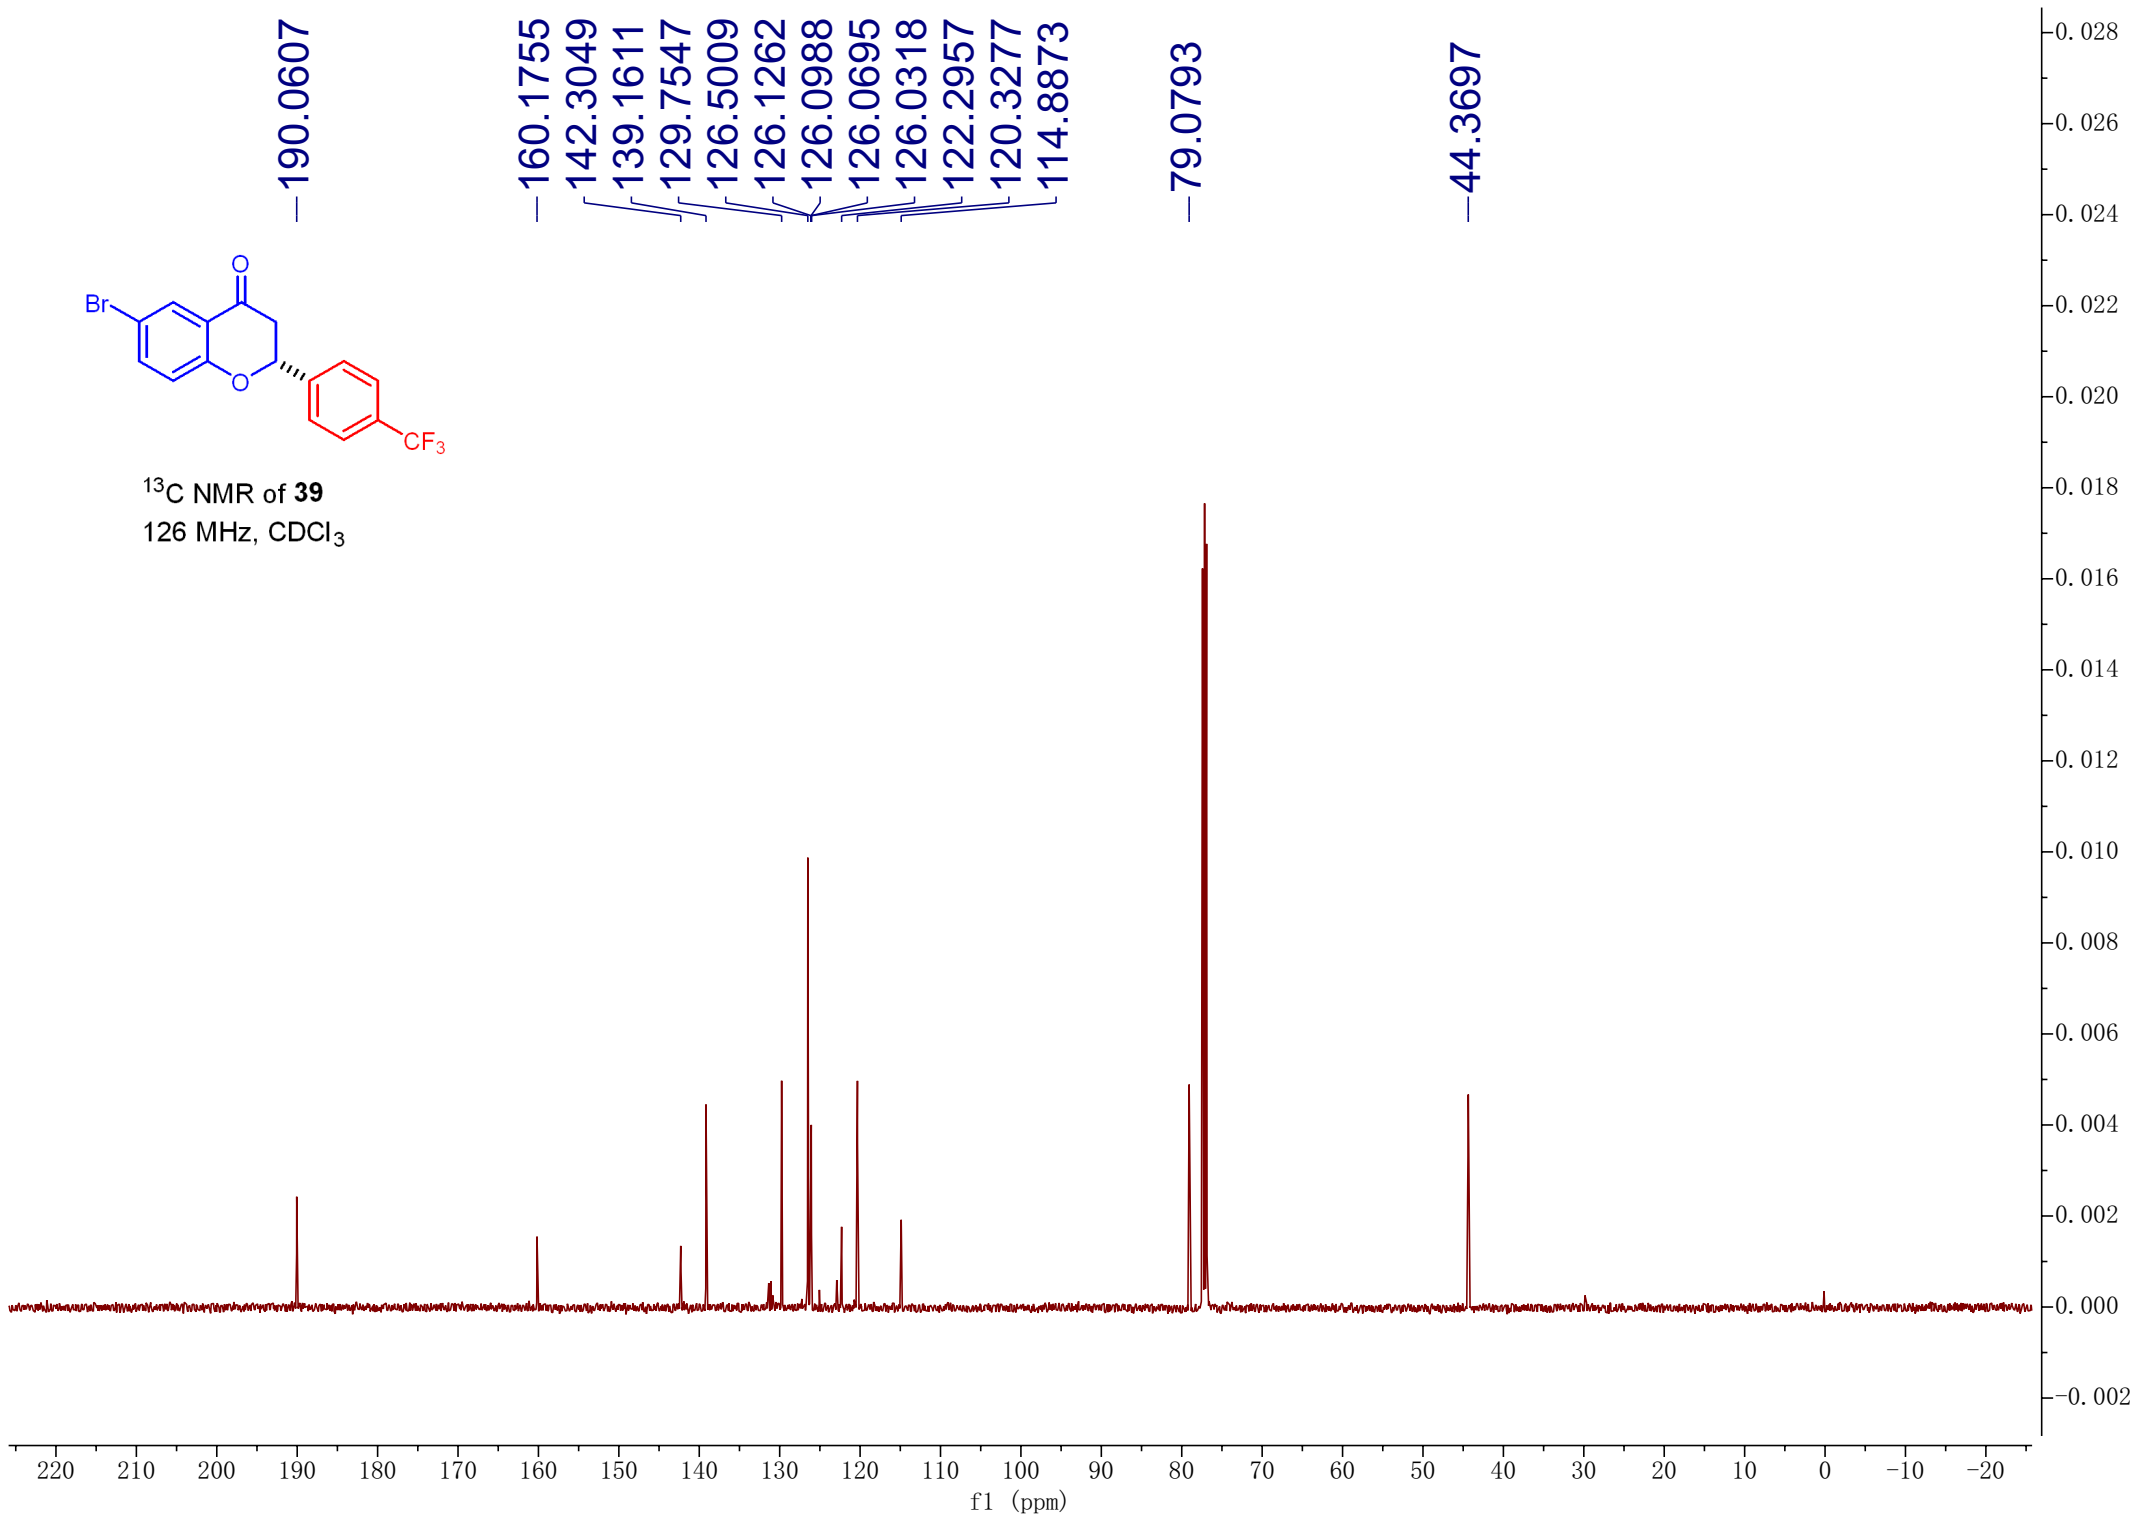

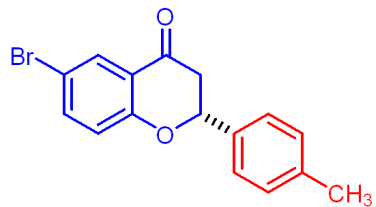

<sup>1</sup>H NMR of **40**  
500 MHz, CDCl<sub>3</sub>

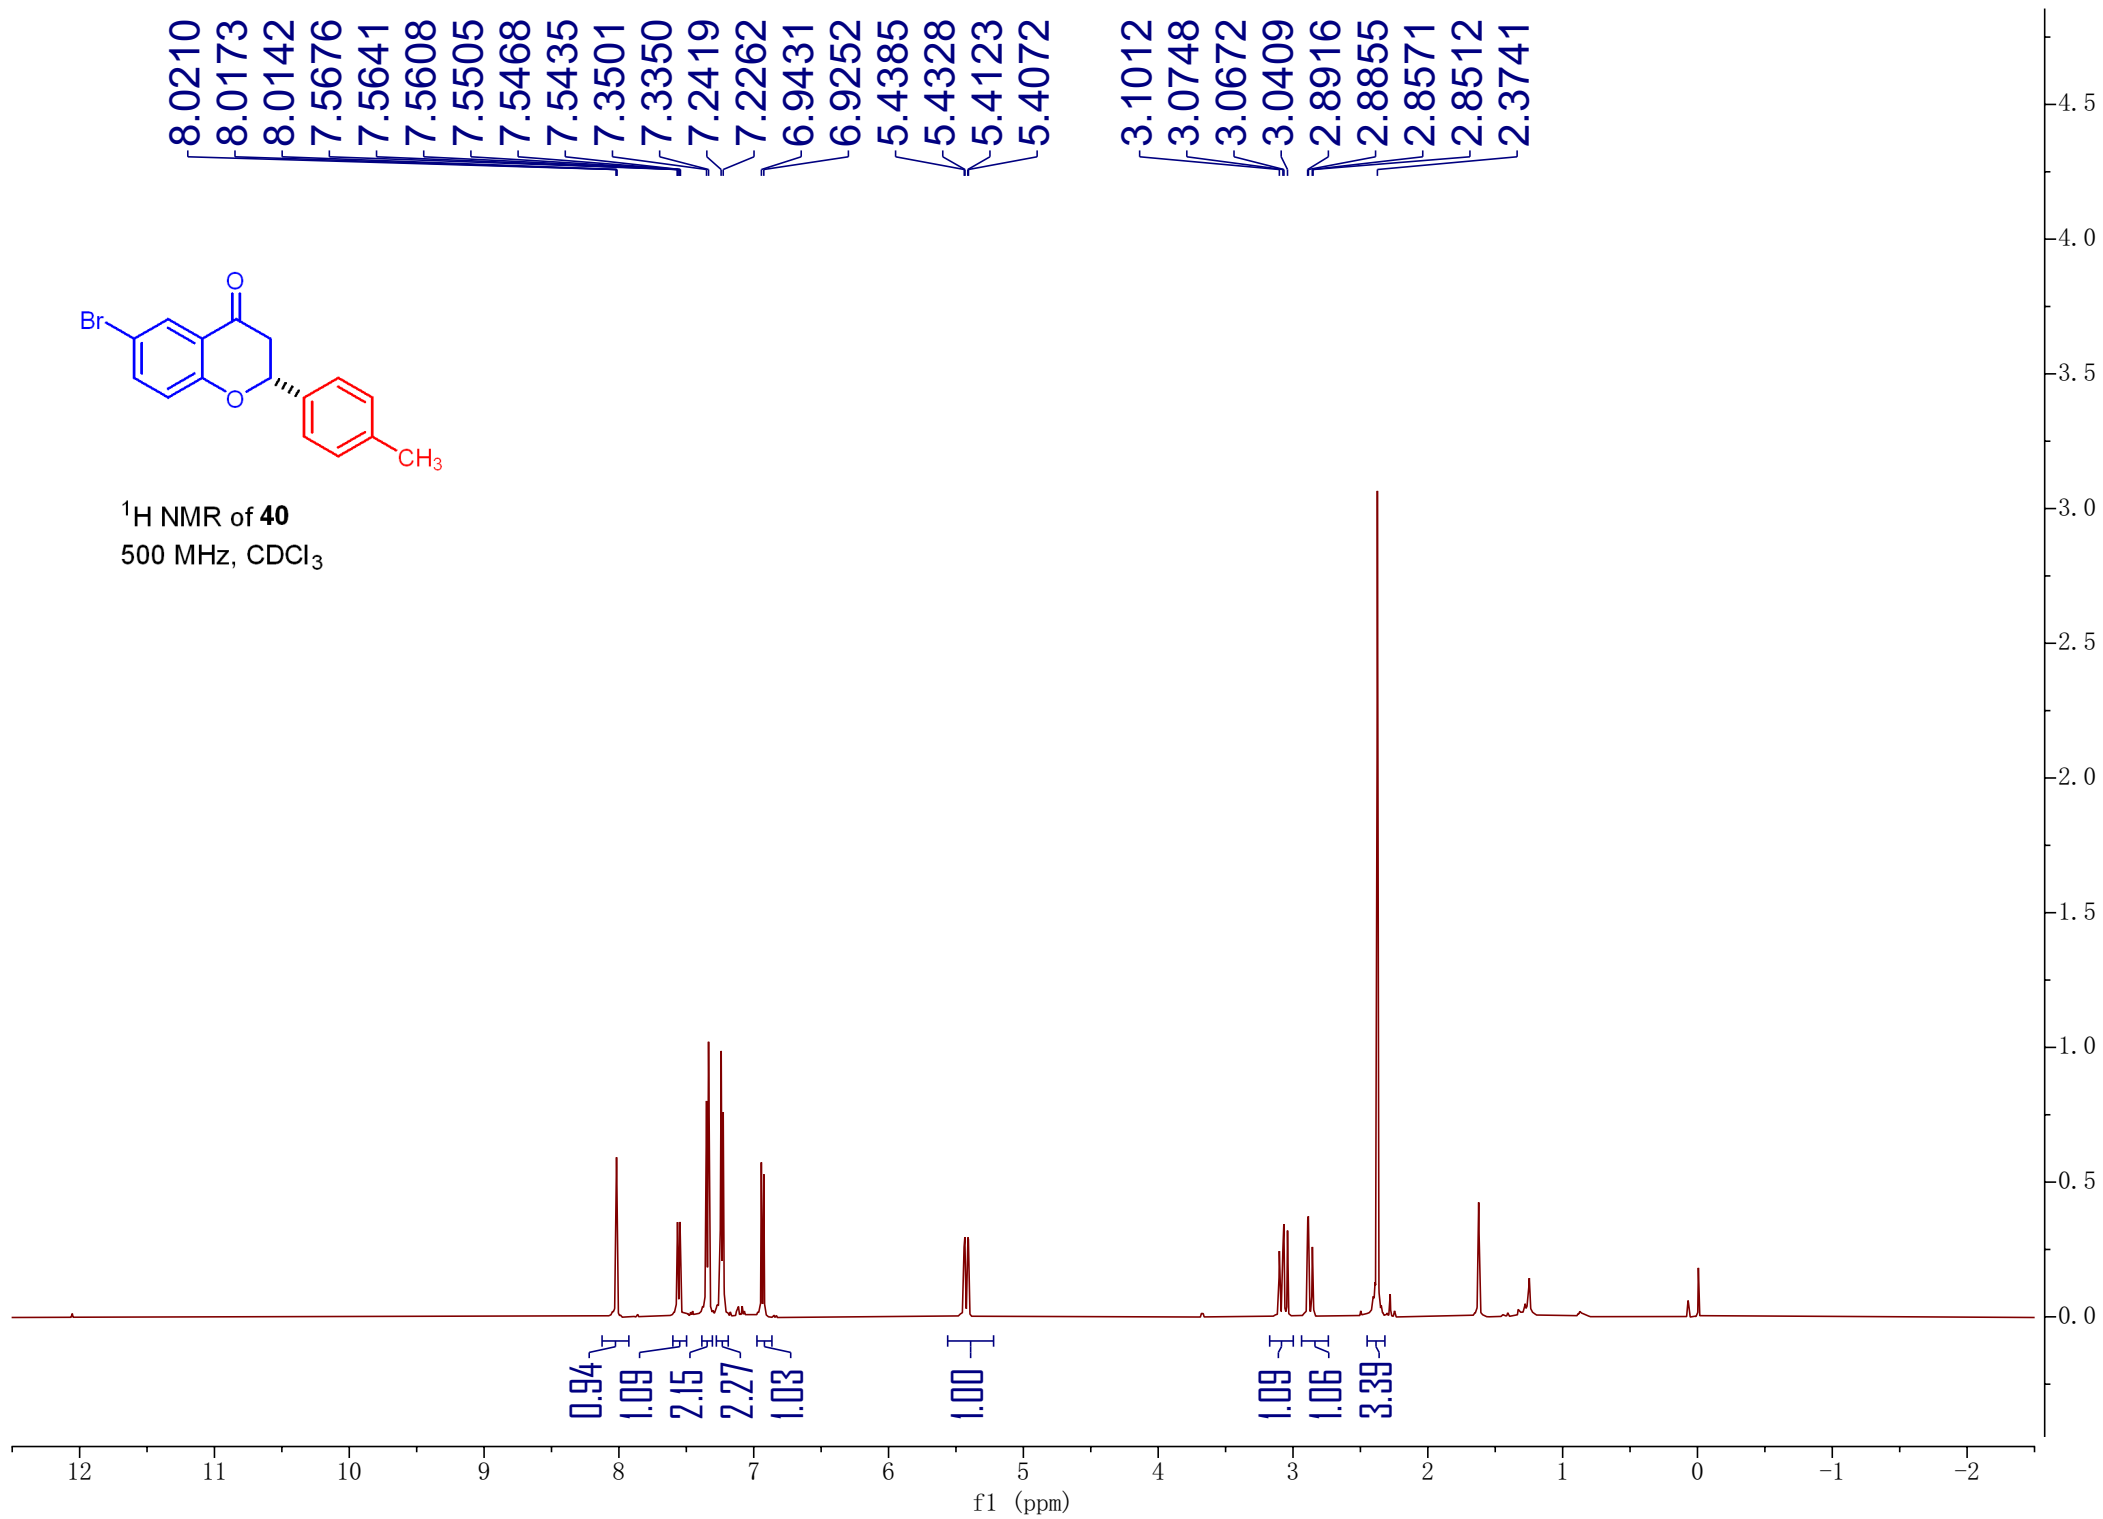

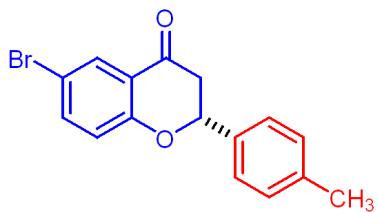

<sup>13</sup>C NMR of **40**  
126 MHz, CDCl<sub>3</sub>

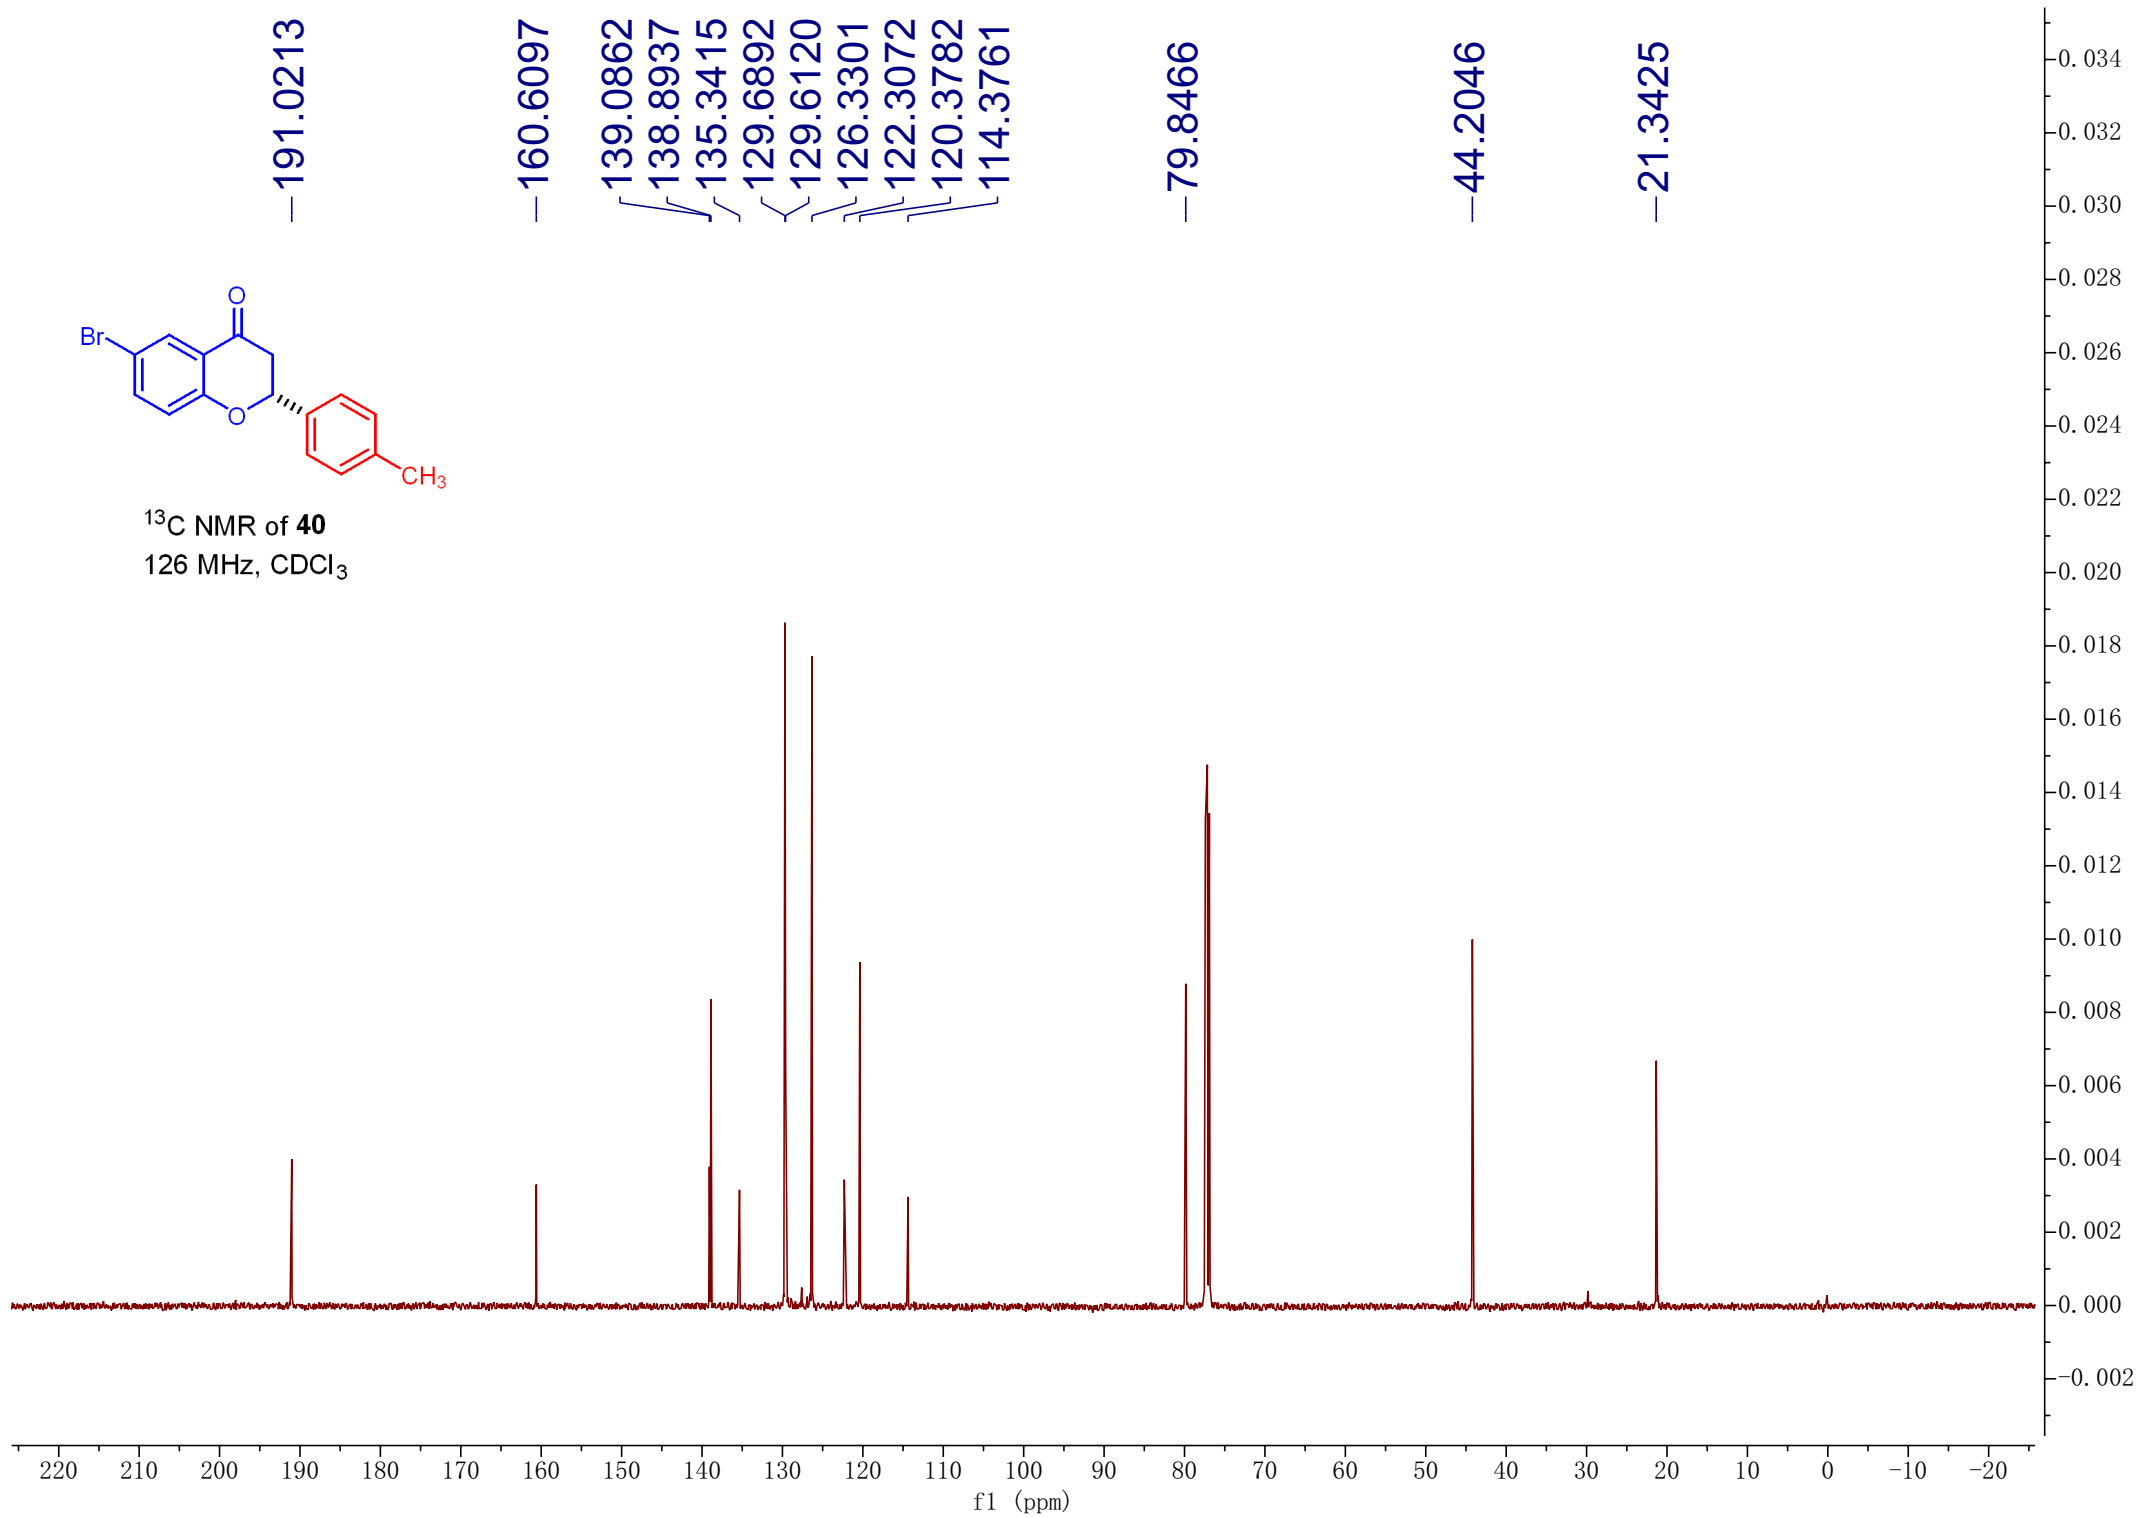

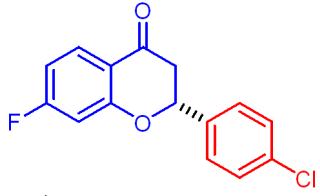

<sup>1</sup>H NMR of **41**  
500 MHz, CDCl<sub>3</sub>

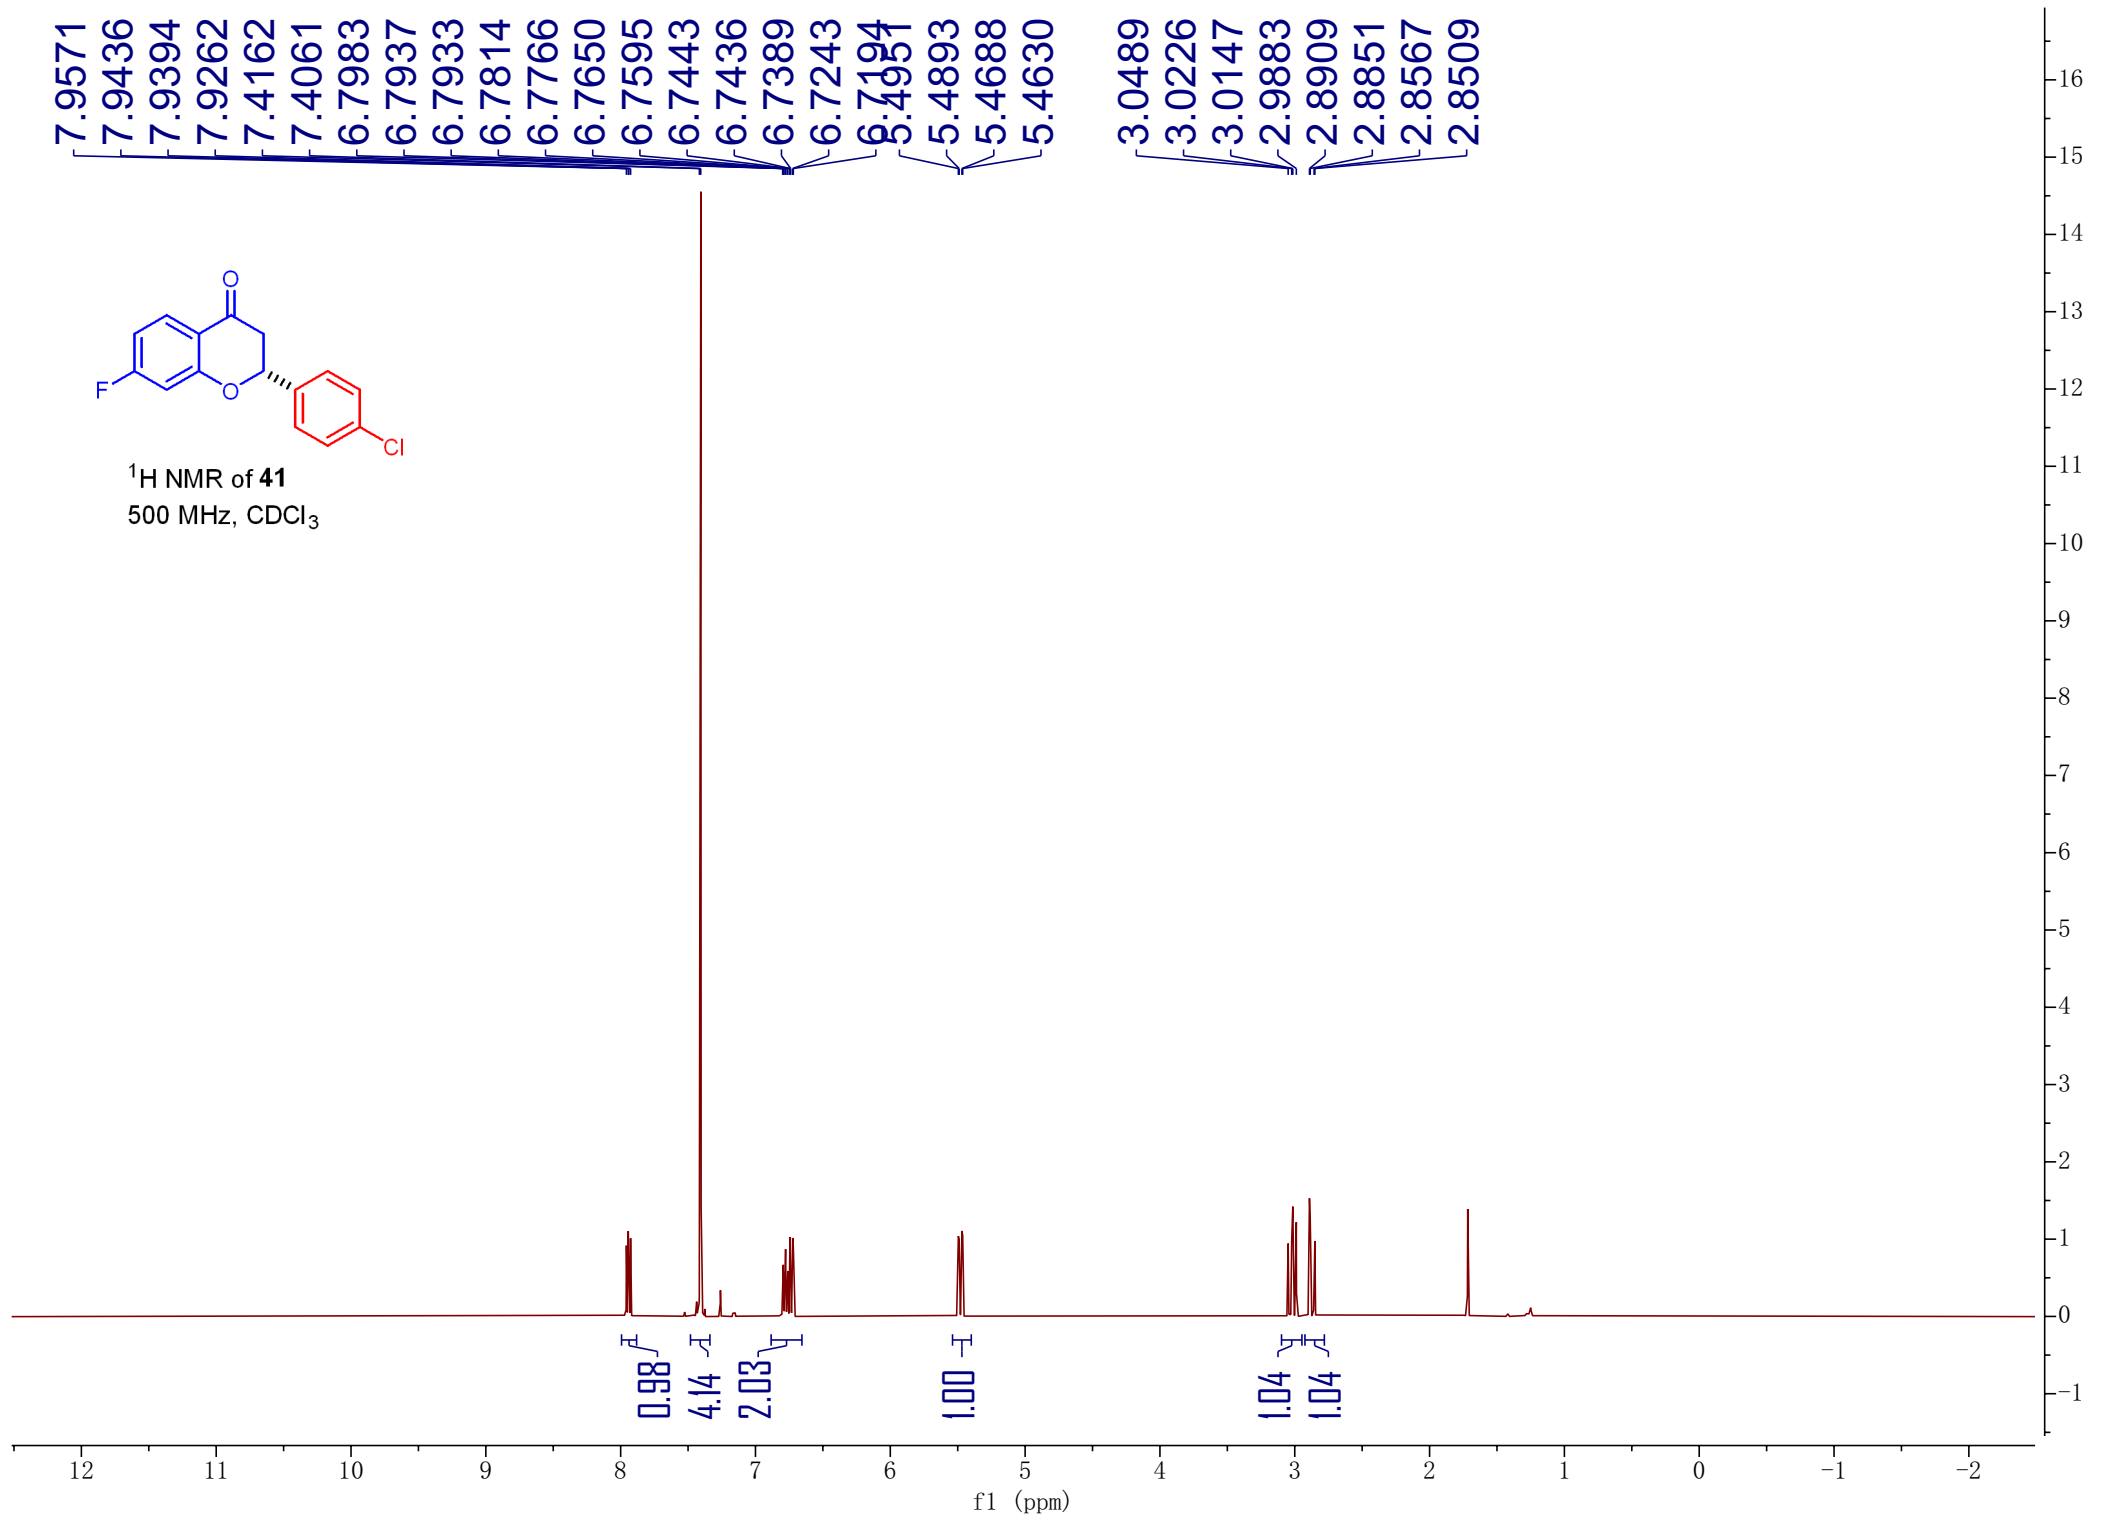

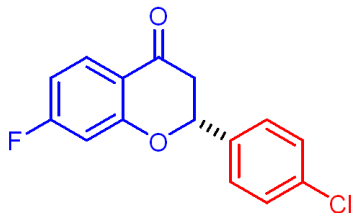

$^{13}\text{C}$  NMR of **41**  
126 MHz,  $\text{CDCl}_3$

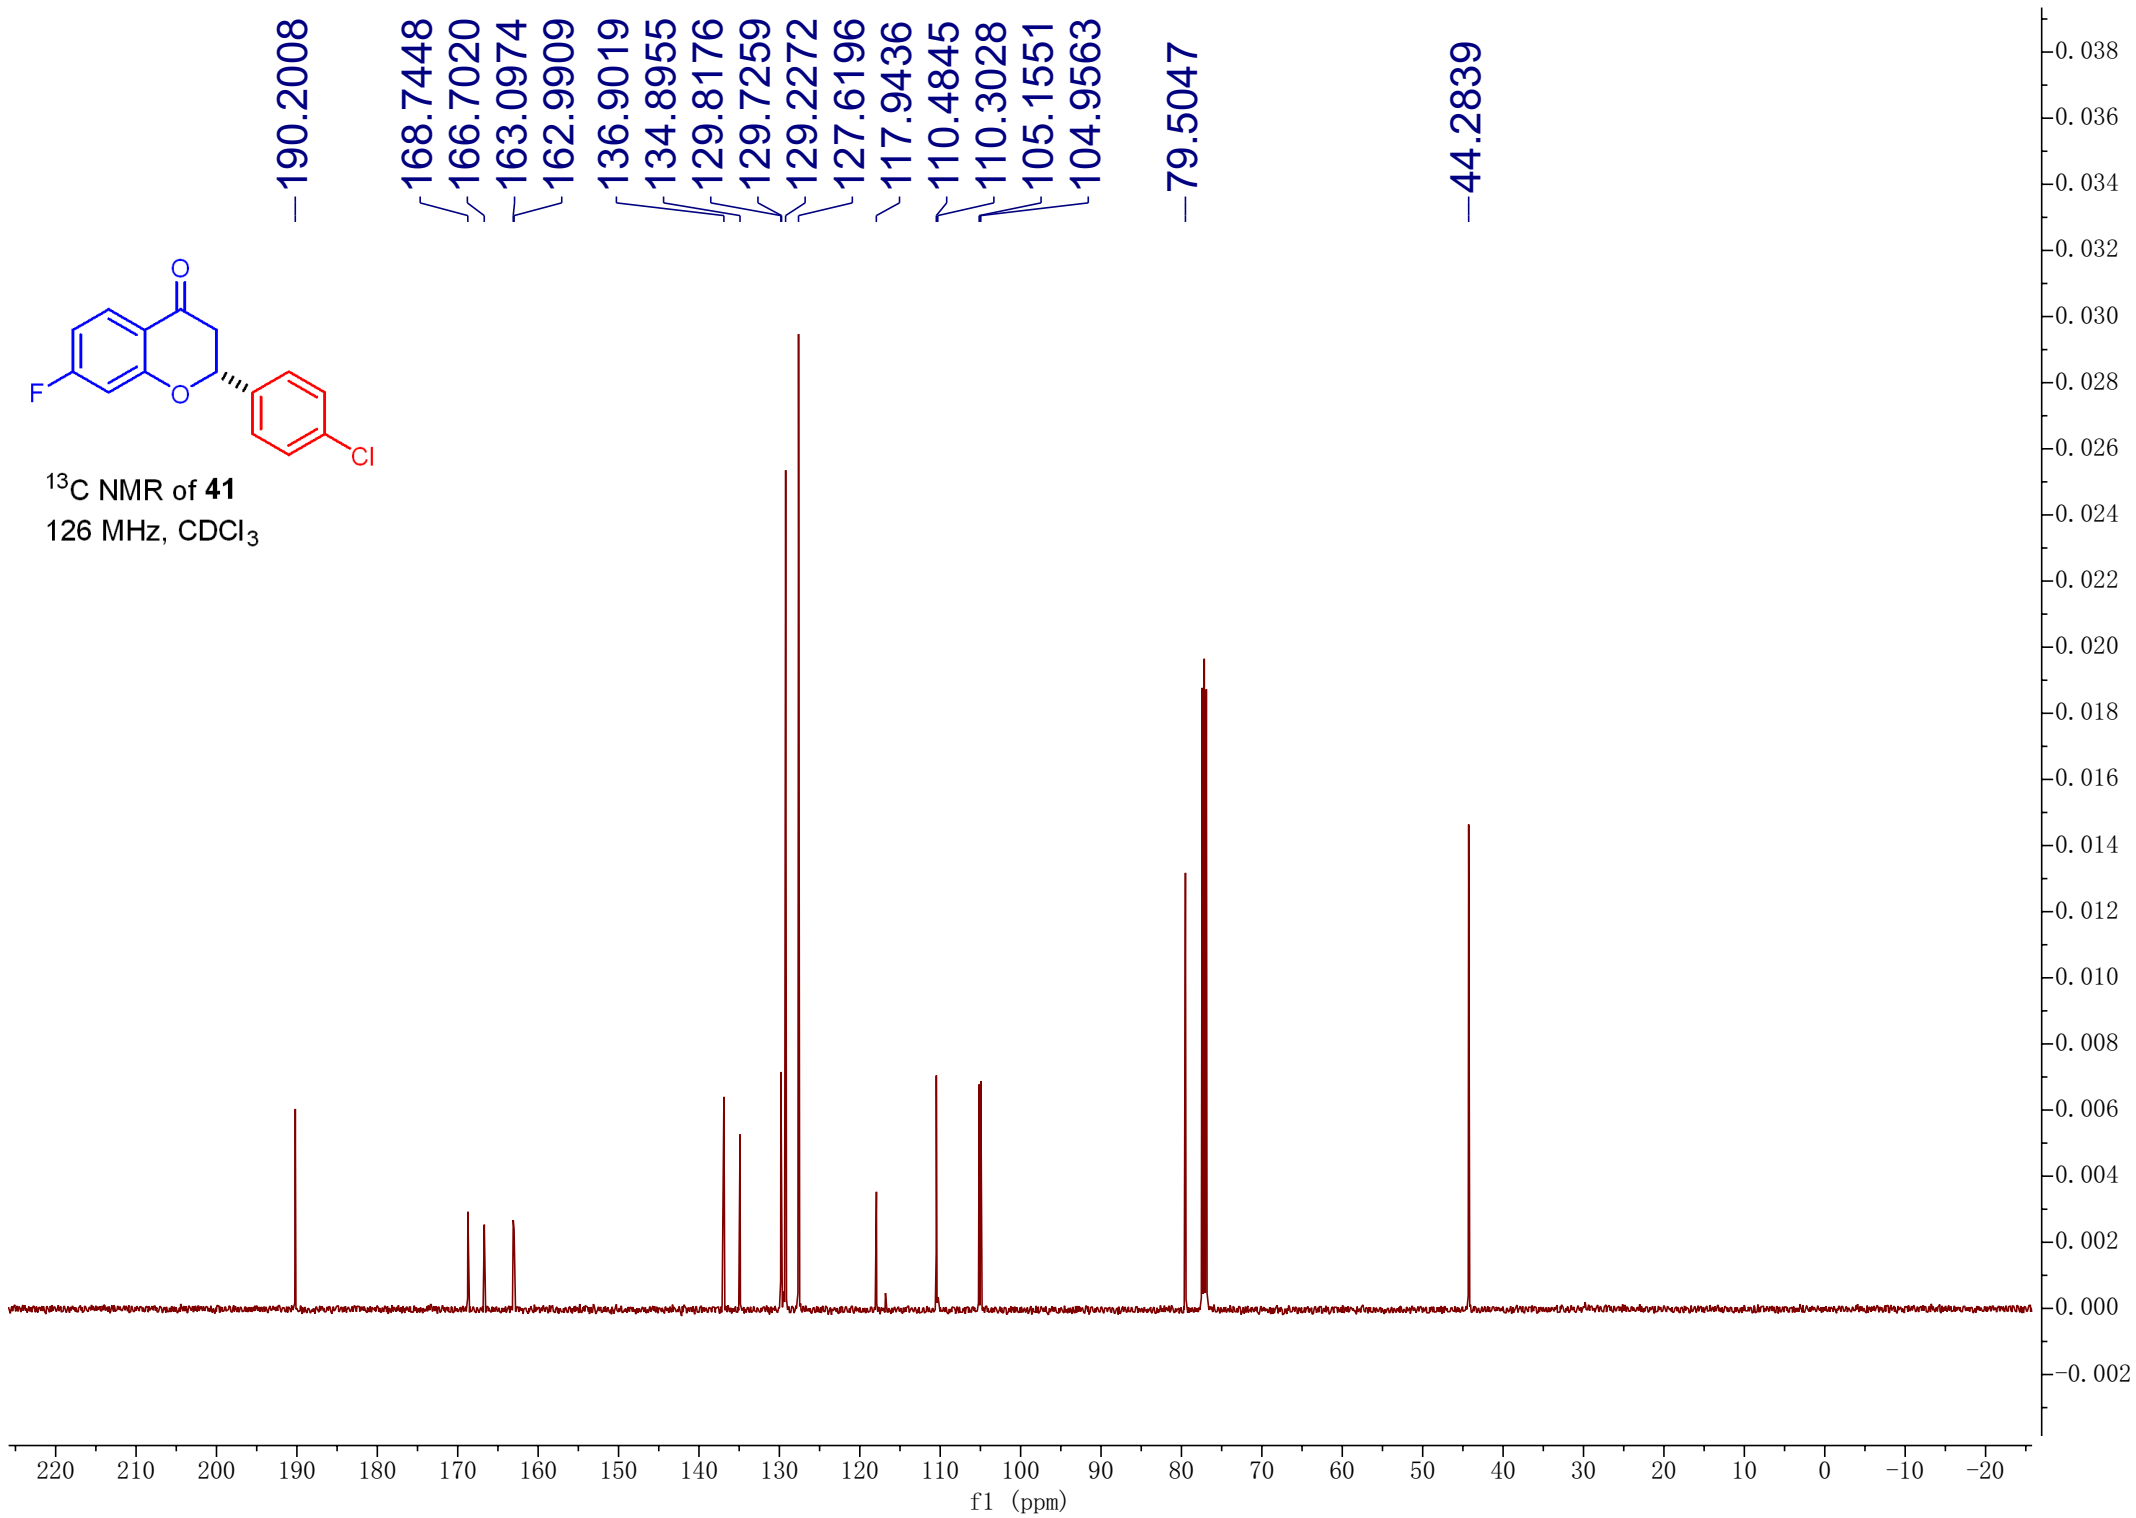

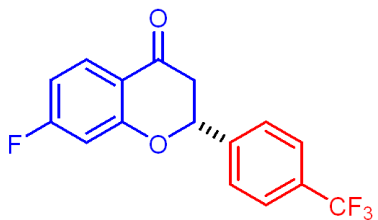

<sup>1</sup>H NMR of **42**  
400 MHz, CDCl<sub>3</sub>

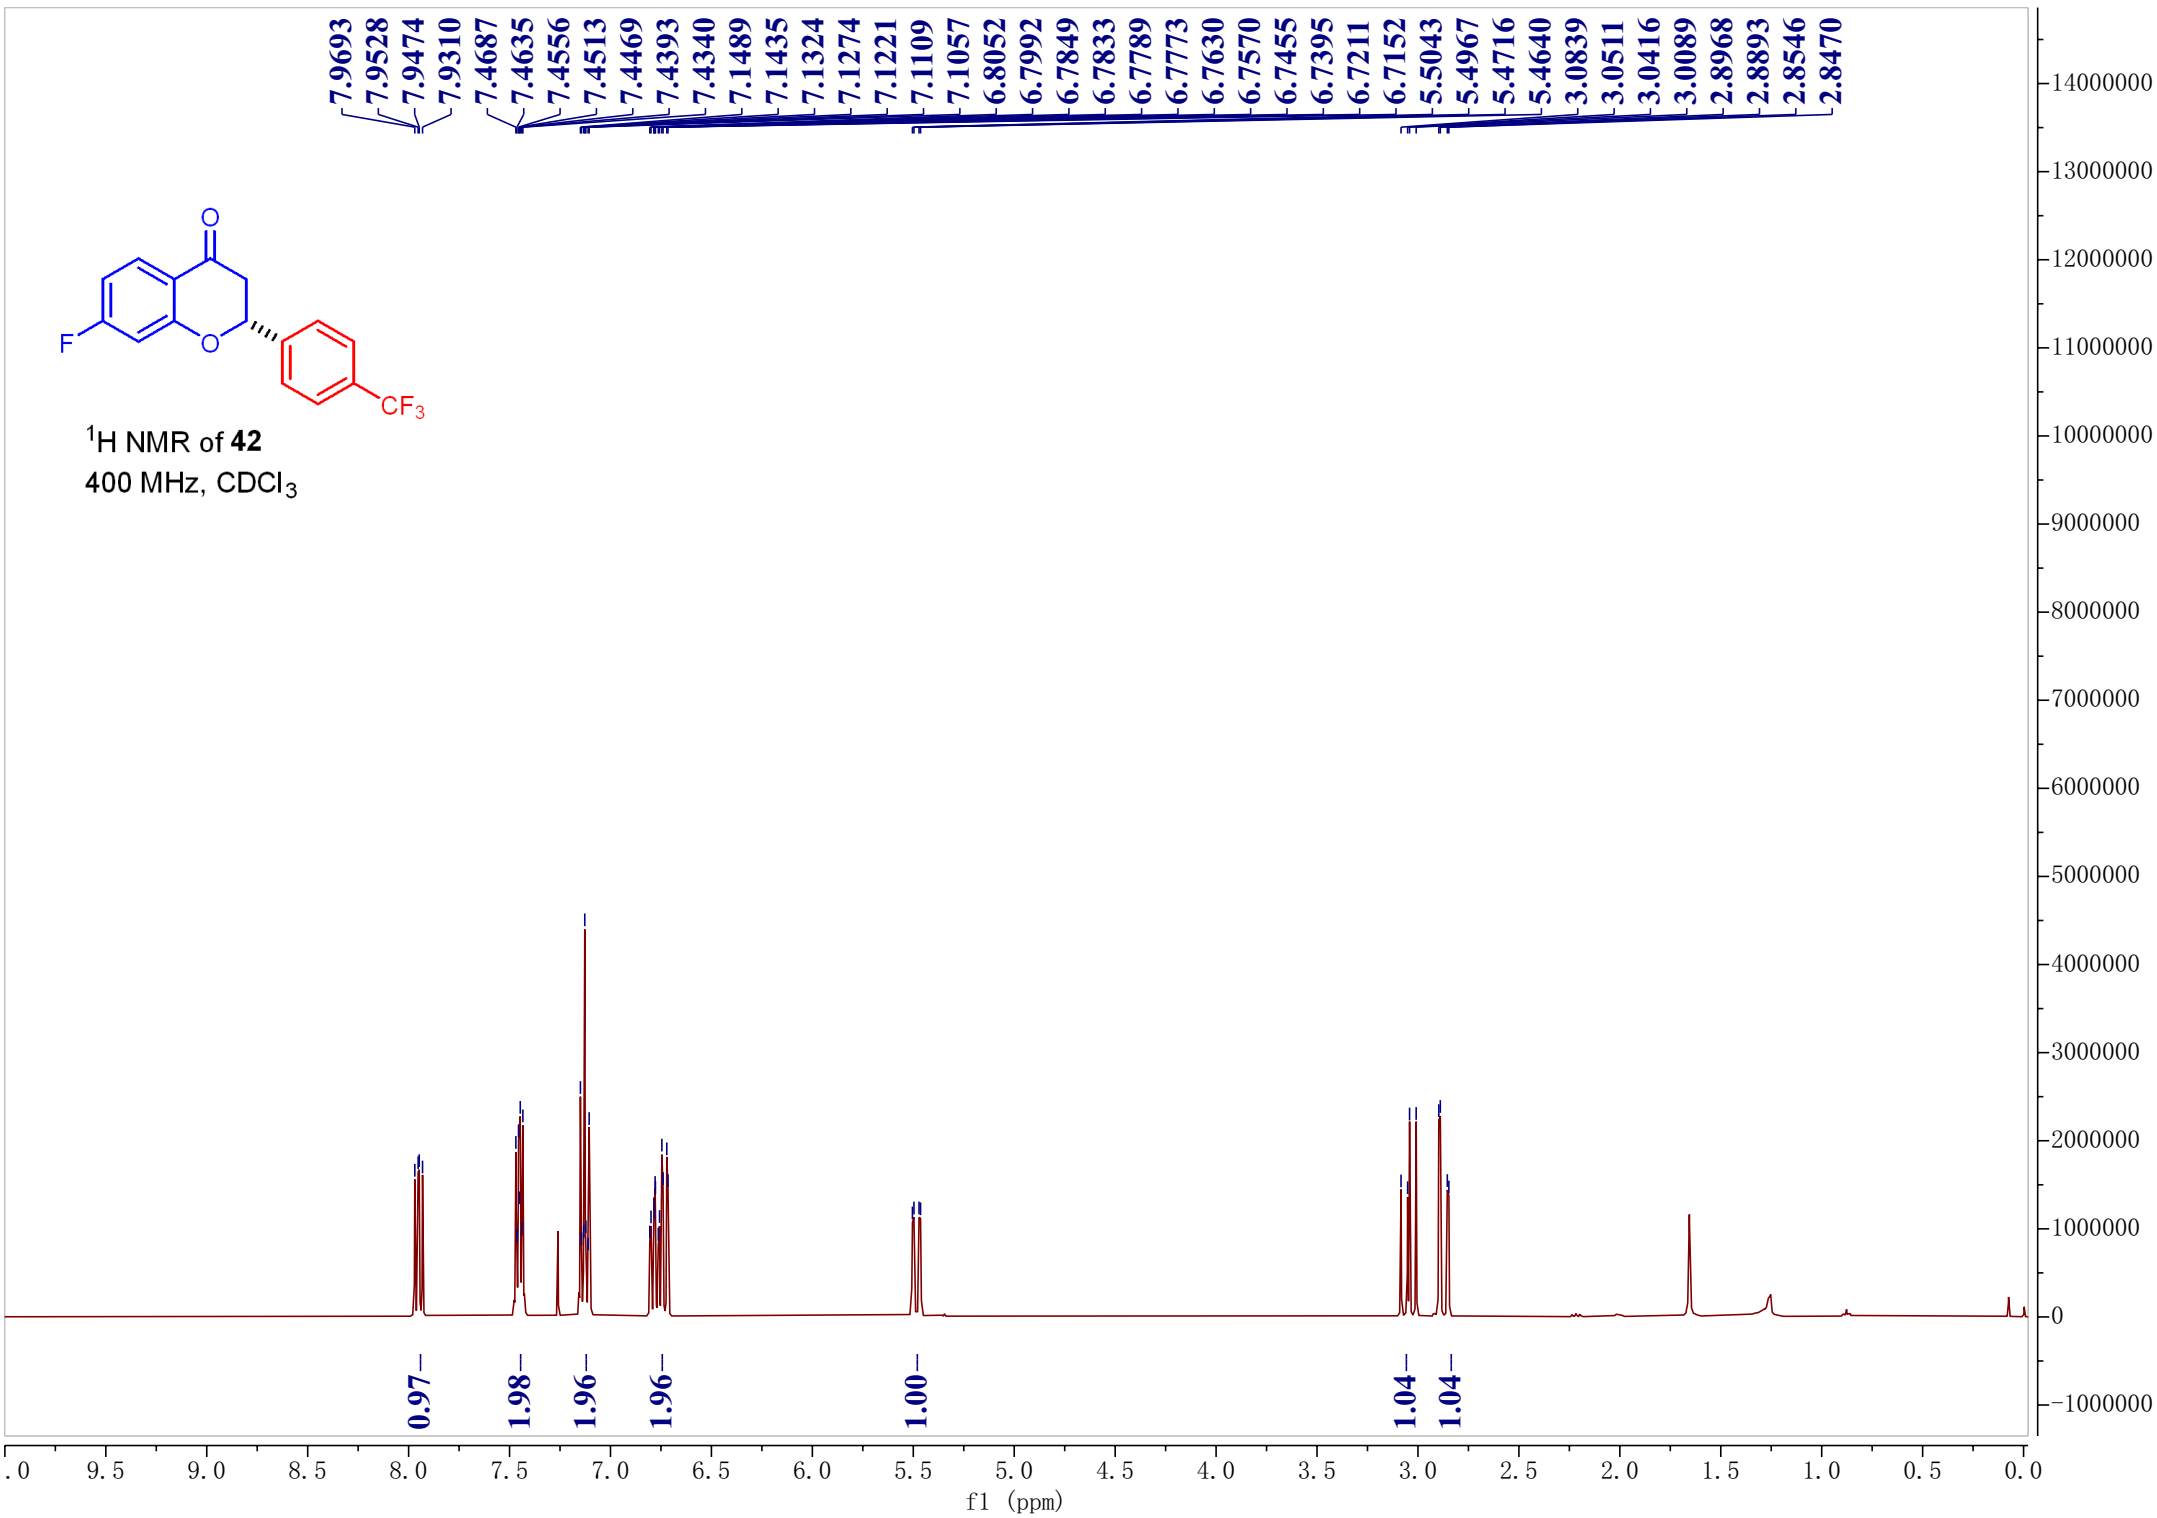

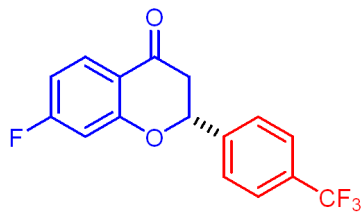

$^{13}\text{C}$  NMR of **42**  
101 MHz,  $\text{CDCl}_3$

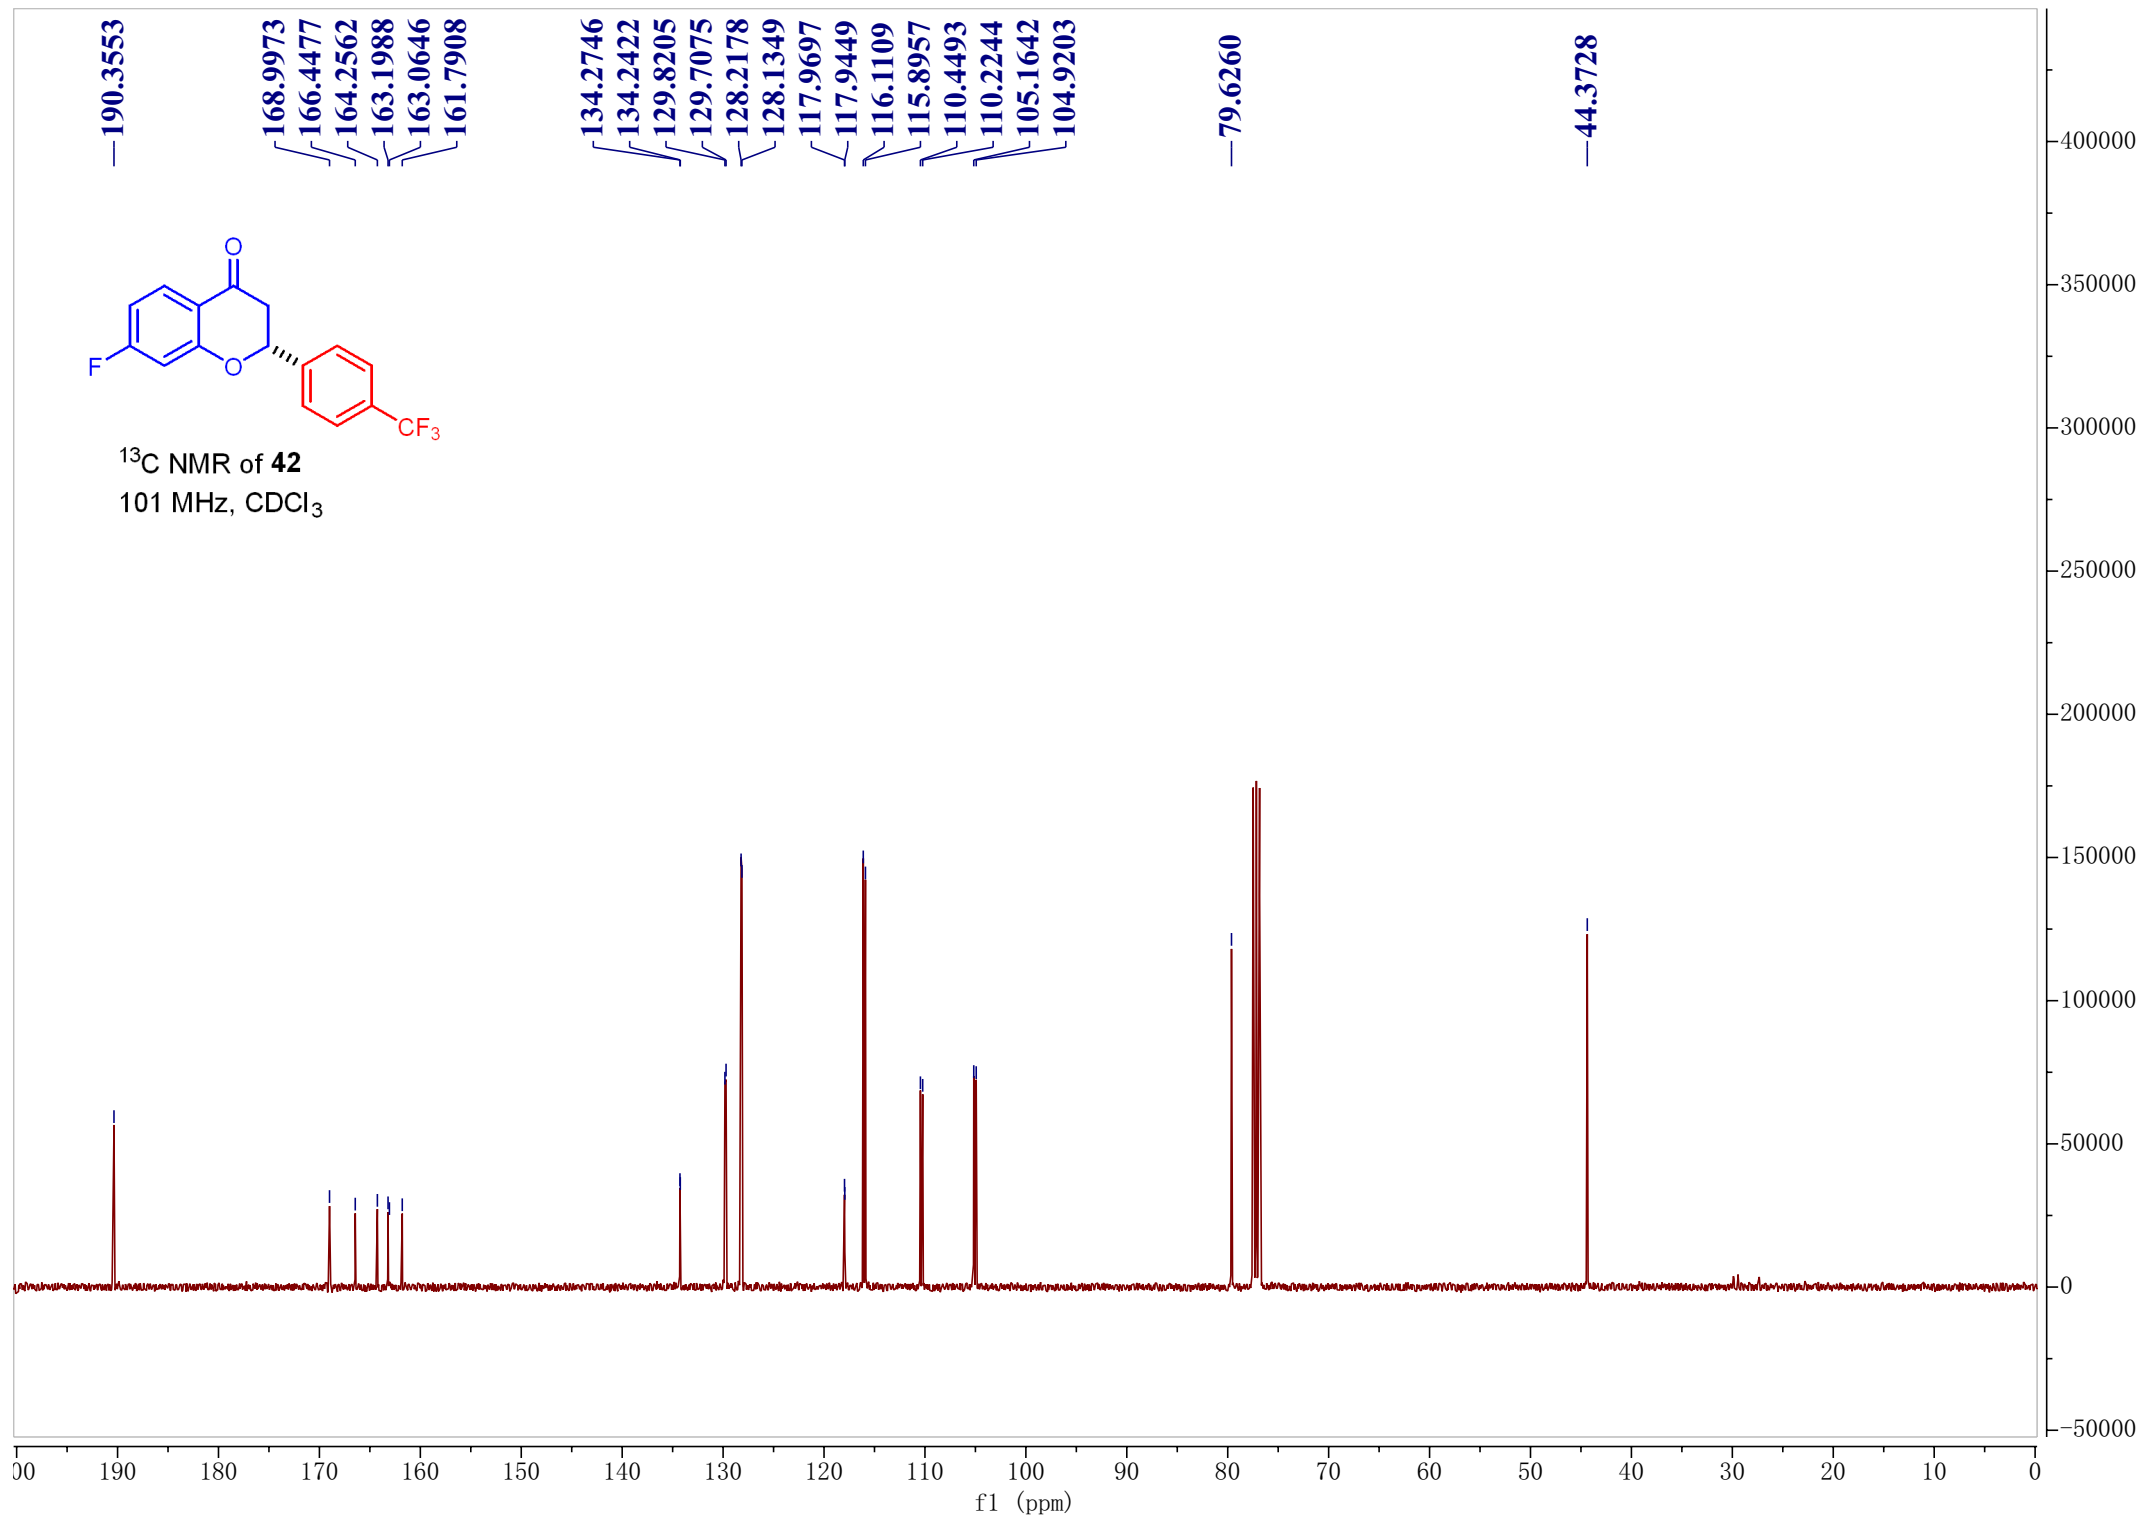



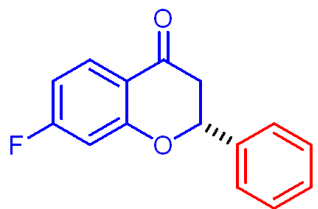

<sup>1</sup>H NMR of **43**  
500 MHz, CDCl<sub>3</sub>

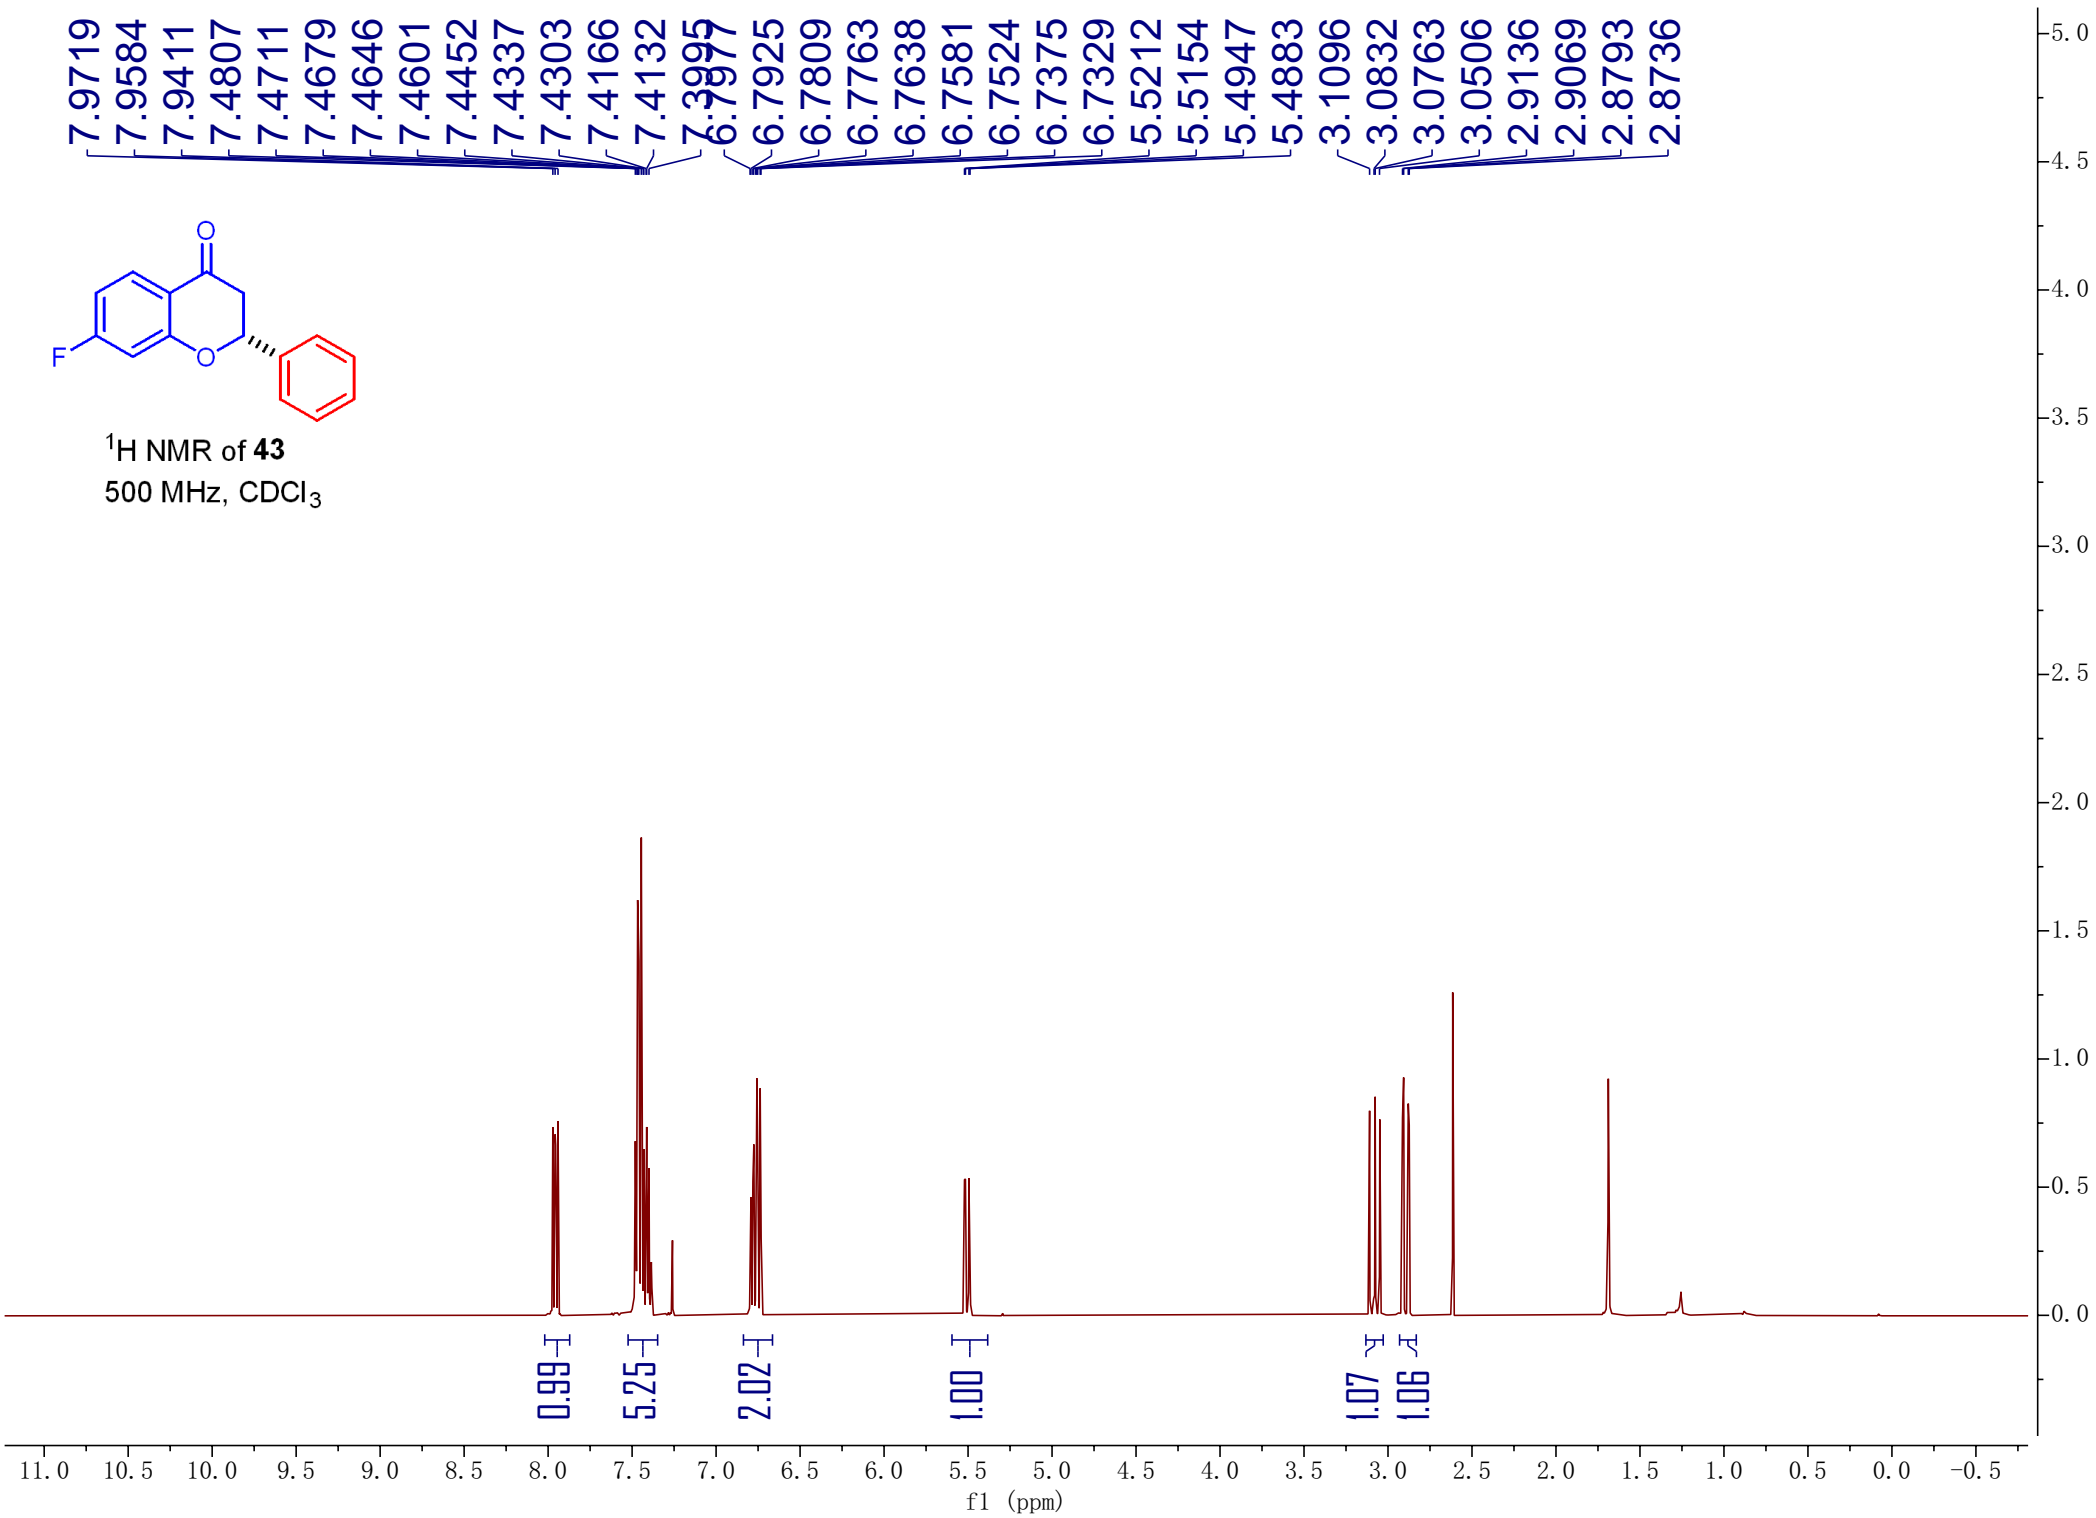

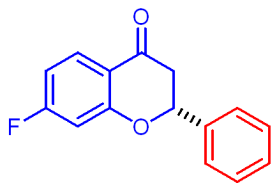

<sup>13</sup>C NMR of **43**  
126 MHz, CDCl<sub>3</sub>

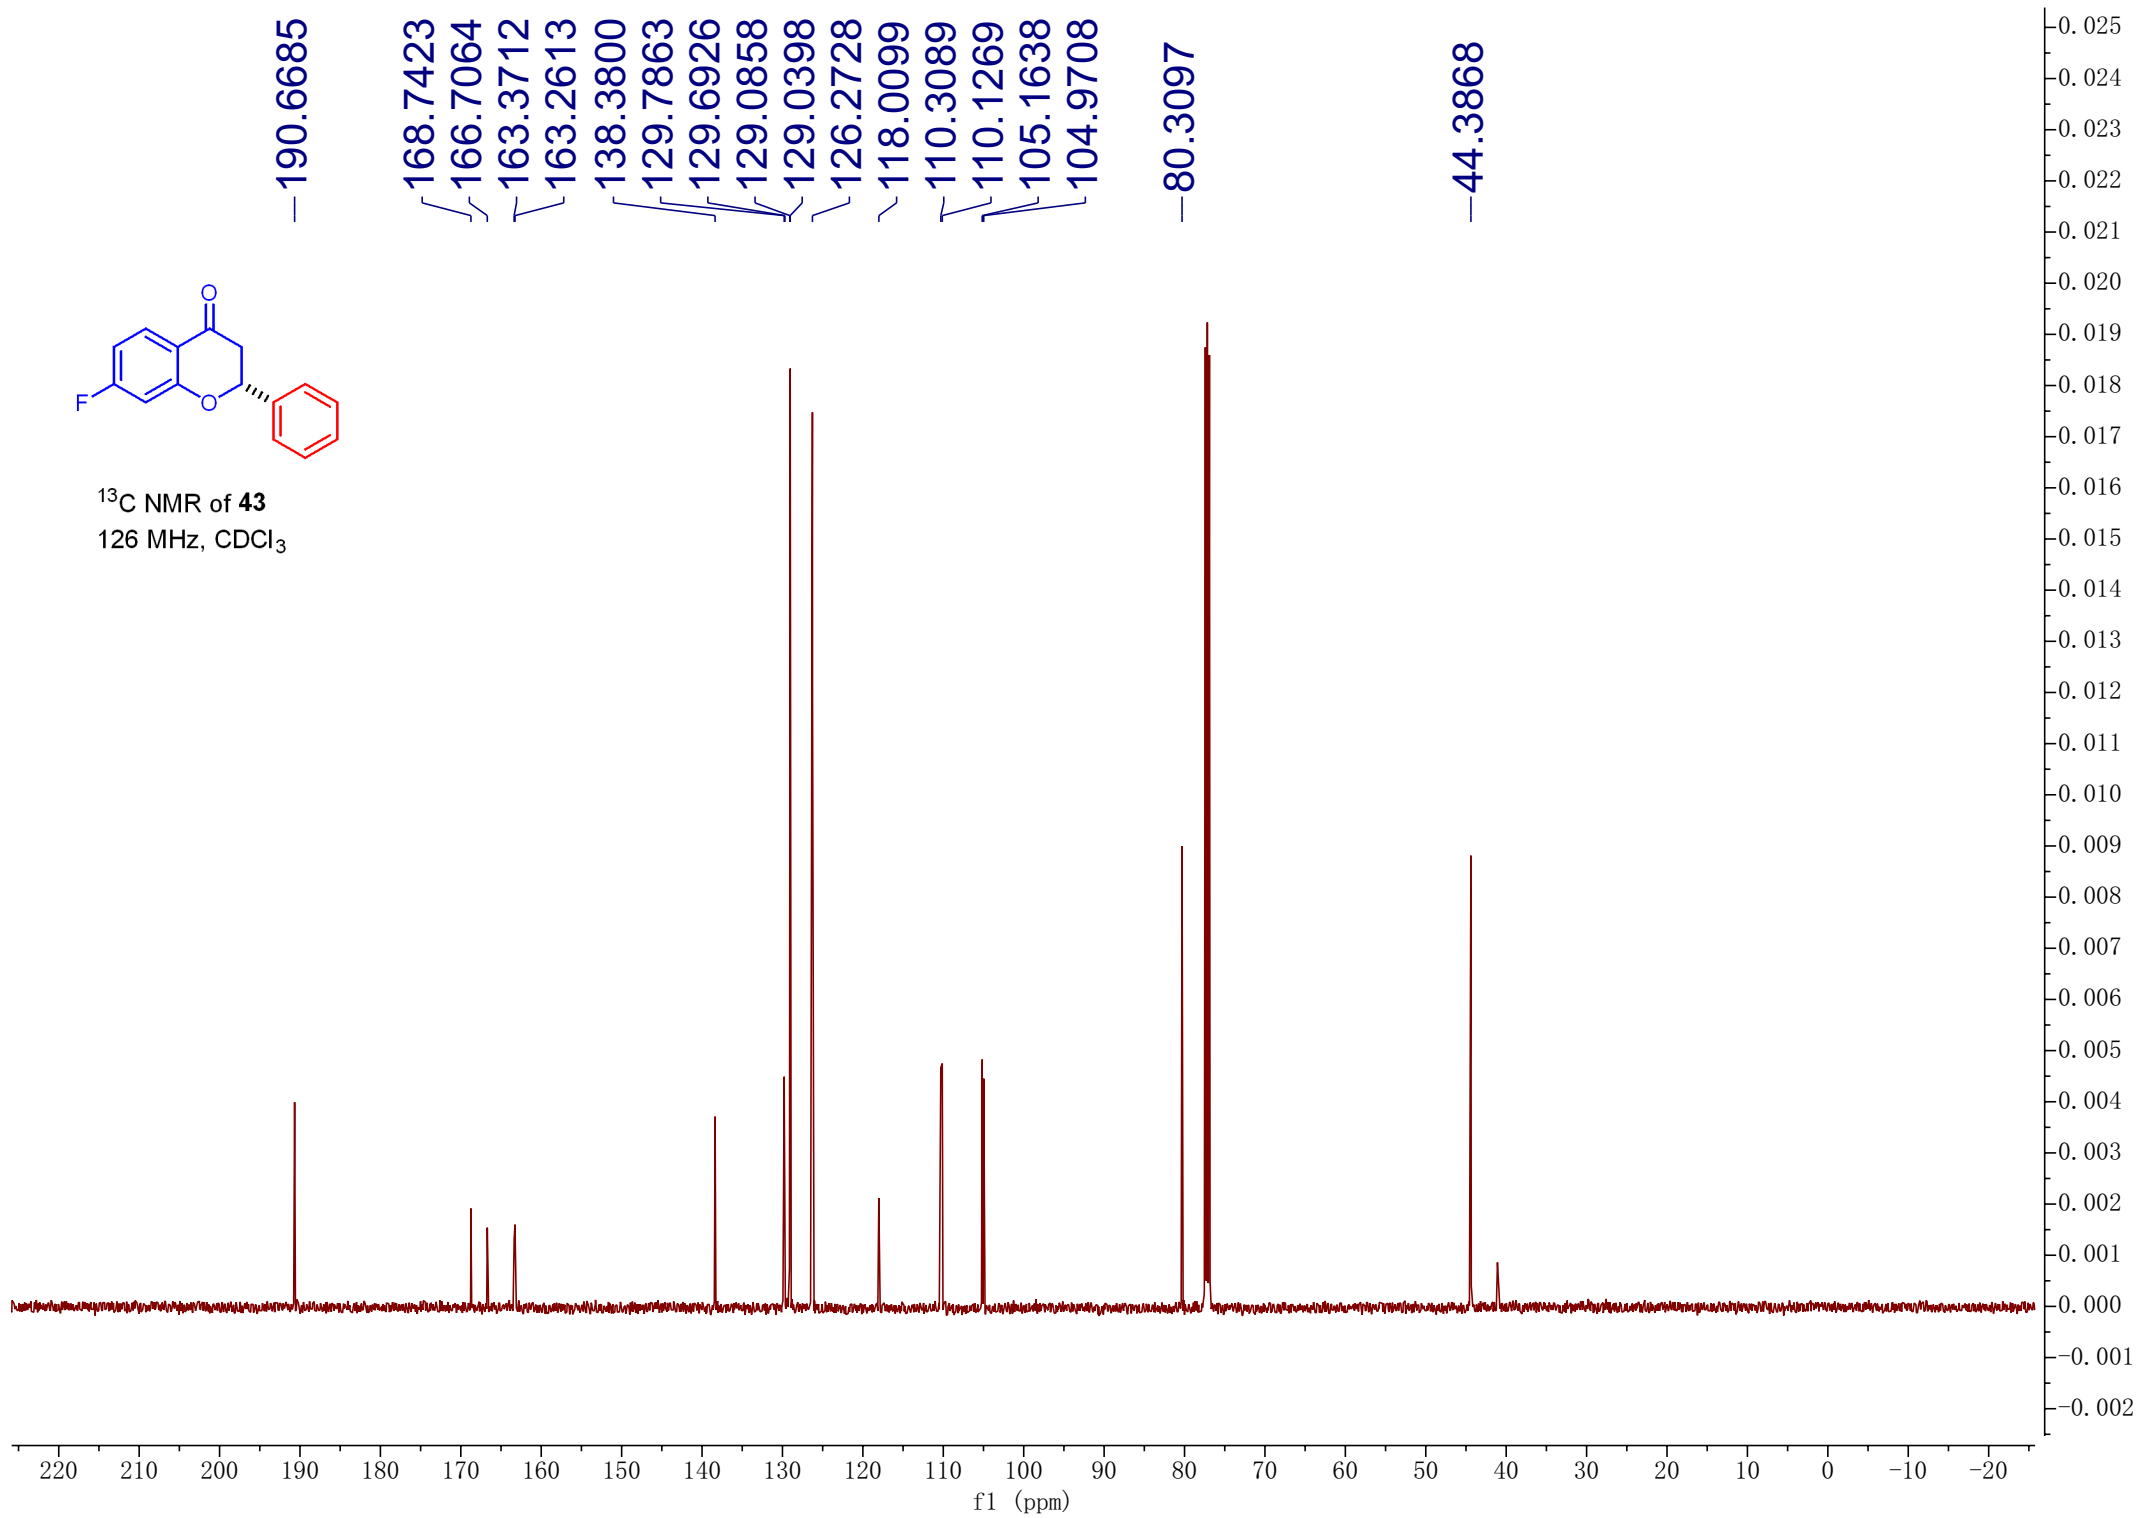

Supplement: d4qo01345j1.pdf [file d4qo01345j1.pdf]
